# Supplementary material
Source: PubMed Central journal article supplement (PMC4720525)
Supplement: NIHMS751228-supplement-01.pdf [file NIHMS751228-supplement-01.pdf]

## **SUPPLEMENTARY MATERIALS**

Transcription factor trapping by RNA in gene regulatory elements

### **TABLE OF CONTENTS**

#### **Materials and Methods**

**Murine embryonic stem cells**

**Antibodies**

**Actinomycin D, THZ1, Triptolide, and DRB treatment**

**Affinity purification of YY1-associated DNA (YY1 ChIP-seq)**

**Analysis of the affinity purified YY1-associated DNA (YY1 ChIP-seq)**

**Genome-wide YY1 binding motif identification**

**Targeting of ESCs with shRNA against an exosome component**

**RNA-seq analysis of changes in steady-state RNA levels in ESCs targeted with shRNA against an exosome component**

**Metagene analysis**

**Statistical tests for change in binding**

**Heatmap analysis**

**Read distribution analysis**

**Global run-on sequencing (GRO-seq) sample preparation**

**GRO-seq analysis**

**Affinity purification and sequencing of YY1-associated RNA (YY1 CLIP-seq)**

**YY1 CLIP-seq analysis**

**Purification and determination of concentration of the recombinant YY1**

**RNase A treatment and YY1 chromatin binding assay**

**Electrophoretic mobility shift assay (EMSA)**

**DNA oligonucleotides used as probes and competitors in EMSA**

**RNA oligonucleotides used as probes and competitors in EMSA**

**DNA-RNA chimeric oligonucleotides used in *in vitro* tethering experiments**

**Competition EMSA: *in vitro* RNA tethering experiments**

**Generation of stable mESC lines for *in vivo* tethering experiments**

**Affinity purification and qPCR analysis (ChIP-qPCR) of YY1-associated DNA in the *in vivo* tethering experiments**

**Supplementary Figures**

**Supplementary Tables**

## **MATERIALS and METHODS**

### *Murine embryonic stem cells*

Bio-YY1 murine embryonic stem cells (mESCs) (25), control mESCs expressing only biotin ligase *BirA* (25), and bio-OCT4 ESCs (26) were grown on irradiated murine embryonic fibroblasts (MEFs) unless otherwise stated. Cells were grown under standard mESC conditions as described previously (27). Briefly, cells were grown on 0.2% gelatinized (Sigma, G1890) tissue culture plates in ESC media; DMEMKO (Invitrogen, 10829-018) supplemented with 15% fetal bovine serum (Sigma, F4135-500), 1000 U/mL LIF (ESGRO, ESG1106), 100  $\mu$ M nonessential amino acids (Invitrogen, 11140-050), 2 mM L-glutamine (Invitrogen, 25030-081), 100 U/mL penicillin, 100  $\mu$ g/mL streptomycin (Invitrogen, 15140-122), and 8 nL/mL of 2-mercaptoethanol (Sigma, M7522).

### *Antibodies*

Anti-RNA polymerase II (phospho CTD Ser-2) (Millipore, 04-1571), anti-YY1 (Santa Cruz Biotechnology, SC-1703), anti- $\beta$ -Tubulin (Millipore, 05-661), anti-Histone H3 (Abcam, ab1791), anti-OCT4 (Santa Cruz, 8628X), and anti-EXOSC3 (Abcam, ab156683) antibodies were used for Western blot analyses.

### *Actinomycin D, THZ1, Triptolide, and DRB treatment*

Bio-YY1 mESCs were treated with 1  $\mu$ M of Actinomycin D, 10  $\mu$ M THZ1, or 1  $\mu$ M triptolide prepared in 100% DMSO or with equal amount of DMSO by adding the drug or DMSO directly to the culture media and incubating cells with the drug for 6hrs at 37°C. Cells were washed with PBS and used for GRO-seq or ChIP-seq analysis. In the DRB experiment, cells were treated with 100  $\mu$ M DRB for 3hrs and YY1 ChIP-qPCR was performed after the first 10, 20, and 30 minutes of incubation with the drug, whereas

ChIP-seq was performed after 30-min of incubation with the drug. At the end of the 3hr-treatment, cells were washed two times with PBS, and YY1 ChIP-qPCR was performed after the first 10, 20, and 30 minutes after fresh media without the drug was added to the cells, whereas ChIP-seq was performed 30 minutes after fresh media was added as previously described (28).

#### Affinity purification of YY1-associated DNA (YY1 ChIP-seq)

Purification of YY1-associated chromatin was performed using bio-YY1 mESCs (25). Detailed protocol was described previously (29). Bio-YY1 is expressed at 10-20% of the endogenous YY1 protein level as has been estimated using quantitative Western blot analysis. mESCs were depleted of MEFs by splitting mESCs twice (1:5) when cells reached confluence onto newly gelatinized plates without MEFs and growing them until achieving confluence again. Approximately  $5 \times 10^7$  mESCs were chemically crosslinked by the addition of one-tenth volume of fresh 11% formaldehyde solution for 10 minutes at room temperature. Cells were rinsed twice with 1X PBS and harvested using a silicon scraper and flash frozen in liquid nitrogen. Cells were stored at  $-80^{\circ}\text{C}$  prior to use. Cells were sonicated (Misonix Sonicator 3000) in sonication buffer (20mM Tris-HCl pH 8.0, 150mM NaCl, 2mM EDTA, 1% Triton X-100, 0.1% SDS) for 10 cycles at 30 seconds each on ice at 21 watts (60 second pause between pulses). The resulting whole cell extract was cleared by centrifugation for 10 min at 12,000 g and then incubated overnight at  $4^{\circ}\text{C}$  with 50  $\mu\text{l}$  streptavidin sepharose high performance (GE Healthcare, 17-5113-01). Beads were washed 2X with 2% (vol/vol) SDS, 1X with 50mM HEPES pH 7.5, 500mM NaCl, 1mM EDTA, 1% Triton X-100, 1X with 10mM Tris-HCl pH 8.0, 250 mM LiCl, 1mM EDTA, 0.5% NP40, 0.5% sodium deoxycholate, and 2X with TE buffer. The affinity-purified DNA was eluted and formaldehyde crosslinks were reversed overnight at  $65^{\circ}\text{C}$ . The DNA were purified by phenol/chloroform extraction and precipitated with ethanol. The ChIP-seq libraries were prepared with Illumina TruSeq DNA Sample Preparation kit, and sequenced on Illumina HiSeq 2000.

### Analysis of the affinity purified YY1-associated DNA (YY1 ChIP-seq)

Acquired images were processed through the bundled Illumina image extraction pipeline, which identified polony positions, performed base calling and generated QC statistics. Sequences were aligned using Bowtie 1.0.1 (30) to NCBI Build 37 (UCSC 37, mm9) of the mouse genome. Alignments were performed with the following parameters: `-k 1 -m 1 -n 2 -p 4 -l 40 -best -sam`. WIG files for visualization were made using MACS (31) with parameters `-w -S -space=50 -nomodel -shiftsize=200 -keep-dup=1`. WIG files were uploaded and visualized on the UCSC Genome Browser (32). Peaks were identified using MACS with corresponding control and parameters `-p 1e-9` and `-keep-dup=1`.

### Genome-wide YY1 binding motif identification

To identify DNA sequences in the mouse mm9 genome version predicted to bind YY1, we used FIMO (33). The genome was scanned with PWMs MA0142.1 from Jaspar (34) for OCTSOX, and YY1\_full from (35) for YY1.

### Targeting of ESCs with shRNA against an exosome component

The pLKO.1 shRNA constructs against firefly luciferase (as a negative control) and *Exosc3* were a gift from Dr. Phillip Sharp. The targeted sequence in the *Exosc3* mRNA is 5'-GGUGAAUUUCUCCUGGCAGAUC-3'. The targeted sequence in the firefly luciferase mRNA is 5'-GGACAUCACUUACGCUGAGU-3'. The puromycin resistance gene in pLKO.1 construct was replaced with the hygromycin B resistance gene using *BamHI* and *KpnI* sites. About 3  $\mu$ g pLKO.1 vector, 2.5  $\mu$ g pMD2, and 7.5  $\mu$ g pPAX plasmids were transfected into 6 million HEK293FT cells in T75 tissue culture flask using Lipofectamine 2000 (Life technologies) according to the manufacturer's instructions. Growth media was replaced with 10 ml fresh media 16hrs post-transfection. Lentivirus-containing supernatants were harvested 48hrs post-transfection and

centrifuged at 1200 rpm for 20 min at room temperature to pellet cell debris. About 3 million mESCs in 4 ml complete growth media were incubated with 3 ml lentivirus-containing supernatant with polybrene (final concentration 6  $\mu\text{g}/\text{ml}$ ). The next day, the media was replaced with complete mESC culture media containing 500  $\mu\text{g}/\text{ml}$  hygromycin B (Life Technologies, 10687-010). After 7 days of selection, mESCs were maintained in complete growth media containing 200  $\mu\text{g}/\text{ml}$  hygromycin B.

Total RNA was isolated from 10 million mESCs (luciferase control or *Exosc3* knockdown cells) using mirVana miRNA Isolation Kit (Ambion, AM1560) according to the manufacturer's protocol. About 7.6  $\mu\text{l}$  of 1:100 fold dilution of ERCC RNA Spike-In Mix (Ambion, 4456740) was added to 1  $\mu\text{g}$  total RNA. TruSeq Stranded RiboZero libraries were then prepared and sequenced on Illumina HiSeq2000.

For YY1 ChIP-Seq experiments, mESCs targeted with control and *Exosc3* shRNAs were counted and equal number of cells was plated 12hrs before crosslinking.

#### *RNA-Seq analysis of changes in steady-state RNA levels in ESCs targeted with shRNA against an exosome component*

RNA-seq reads were aligned to the non-random mm9 version of the mouse reference genome with added ERCC spike-in chromosomes using tophat (36) with a GTF of mouse RefSeq genes provided as a parameter. FPKM values were calculated twice using RPKM\_count from the RSeQC package (37). The initial run used all mouse RefSeq genes and ERCC spike-ins. This allowed us to determine that exosome knockdown did not cause a loss of mRNA expression, because the ERCC spike-ins added in ratio to cell number provide a normalization method capable of detecting global effects on expression. We floored the expression of all RefSeq genes and ERCC probes at 0.01 and added a pseudocount of 0.1 to all entries. All values were normalized by equilibrating the expression of the ERCC probes between experiments as described previously (38). Briefly, normalize.loess from the affy R package was used to equilibrate

the expression of ERCC probes between experiments and used to normalize the expression of RefSeq genes. A one-tailed Wilcoxon rank sum test of whether RefSeq gene levels decreased upon exosome knockdown showed they did not decrease.

Since expression of RefSeq genes—largely mRNAs—is not lost upon exosome knockdown, we used the RefSeq genes as a normalization method to determine if enhancer RNAs and promoter RNAs tended to increase upon exosome knockdown. FPKM values were calculated for RefSeq genes, ERCC probes, promoters of 16,202 non-overlapping RefSeq genes, and all constituent enhancers. These values were floored at 0.01 and a pseudocount of 0.1 was added. After normalizing using expressed RefSeq genes (RPKM > 1 in both cases) as the constant, we noted that levels of these non-coding RNAs increased. The amount of non-coding RNA level increase is conservative and low because our evidence suggests that mRNA levels also increase upon exosome knockdown. Thus, our normalization shows that enhancer and promoter RNA levels become elevated even relative to the mRNA levels.

### Metagene analysis

Enhancer metagenes were constructed using +/- 2000 bases from the centers of regions co-bound by OCT4, SOX2, and NANOG in mouse ESCs as defined in (23). Super-enhancer constituent metagenes were constructed using +/- 2000 bases from the centers of super-enhancer constituents, which were defined as enhancers contacting super-enhancers as calculated in (23). Promoter metagenes were constructed using +/- 2000 bases from RefSeq transcription start sites that had no other transcription start sites in that window.

Densities were calculated in bins using bamToGFF (39). Resulting values were plotted in R using matplotlib. Figure panel-specific adjustments are noted in the table below. Where noted, we disregarded the top 20 most signal-rich regions, because CLIP-seq signal was unusually concentrated therein, and all of these regions had at least one

RepeatMasker-annotated repeat, often somewhat divergent RNA repeats. Where noted, we used “transcribed” promoters, which had GRO-seq RPM-normalized density >1.

Where noted we used “not transcribed” promoters, which had zero GRO-seq reads and zero H3K4me3 reads. Where noted, multiple reads with the same position were collapsed to one using samtools rmdup except in CLIP-seq analysis where reads were manually collapsed if they had the same barcode and position, and in motif analyses.

Where noted, background signal was subtracted from ChIP or CLIP signal by either per-bin per-region normalization of counts in the exact same genomic location, or by subtracting the mean bin signals of input from the precipitated sample.

Here is the detailed description of the parameters used.

| Figure   | Factor        | Treatment      | Region Type     | # Regions Used | Region Criteria                 | RPM           | Positional Duplicates   | Background Normalization                 |
|----------|---------------|----------------|-----------------|----------------|---------------------------------|---------------|-------------------------|------------------------------------------|
| 1B       | GRO-Seq       | None           | Promoters       | 16202          | Non-Overlapping                 | Y             | Removed                 | None                                     |
| 1B       | GRO-Seq       | None           | Enhancers       | 10627          | All                             | Y             | Removed                 | None                                     |
| 1D, SF1B | YY1 ChIP-Seq  | None           | Promoters       | 16202          | Non-Overlapping                 | Y             | Removed                 | None                                     |
| 1D, SF1B | YY1 ChIP-Seq  | None           | Enhancers       | 10627          | All                             | Y             | Removed                 | None                                     |
| 1D, SF1B | YY1 CLIP-Seq  | None           | Promoters       | 16182          | Non-Overlapping, Discard top 20 | Y             | Removed if same barcode | None                                     |
| 1D, SF1B | YY1 CLIP-Seq  | None           | Enhancers       | 10607          | Discard top 20                  | Y             | Removed if same barcode | None                                     |
| 3B       | GRO-Seq       | DRB -> Release | Promoters       | 16202          | Non-Overlapping                 | N             | Removed                 | None                                     |
| 3B       | GRO-Seq       | DRB -> Release | Enhancers       | 10627          | All                             | N             | Removed                 | None                                     |
| 3B       | GRO-Seq       | DRB -> Release | SE Constituents | 646            | All                             | N             | Removed                 | None                                     |
| 3B       | GRO-Seq       | DRB            | Promoters       | 16202          | Non-Overlapping                 | N             | Removed                 | None                                     |
| 3B       | GRO-Seq       | DRB            | Enhancers       | 10627          | All                             | N             | Removed                 | None                                     |
| 3B       | GRO-Seq       | DRB -> Release | SE Constituents | 646            | All                             | N             | Removed                 | None                                     |
| 3B       | YY1 ChIP-Seq  | DRB -> Release | Promoters       | 16202          | Non-Overlapping                 | Y             | Removed                 | Mean input signal in each bin subtracted |
| 3B       | YY1 ChIP-Seq  | DRB -> Release | Enhancers       | 10627          | All                             | Y             | Removed                 | Mean input signal in each bin subtracted |
| 3B       | YY1 ChIP-Seq  | DRB -> Release | SE Constituents | 646            | All                             | Y             | Removed                 | Mean input signal in each bin subtracted |
| 3B       | YY1 ChIP-Seq  | DRB            | Promoters       | 16202          | Non-Overlapping                 | Y             | Removed                 | Mean input signal in each bin subtracted |
| 3B       | YY1 ChIP-Seq  | DRB            | Enhancers       | 10627          | All                             | Y             | Removed                 | Mean input signal in each bin subtracted |
| 3B       | YY1 ChIP-Seq  | DRB            | SE Constituents | 646            | All                             | Y             | Removed                 | Mean input signal in each bin subtracted |
| 3C       | YY1 ChIP-Seq  | shLuc          | Promoters       | 16202          | Non-Overlapping                 | Y             | Removed                 | per-bin per-region input subtraction     |
| 3C       | YY1 ChIP-Seq  | shLuc          | Enhancers       | 10627          | All                             | Y             | Removed                 | per-bin per-region input subtraction     |
| 3C       | YY1 ChIP-Seq  | shLuc          | SE Constituents | 646            | All                             | Y             | Removed                 | per-bin per-region input subtraction     |
| 3C       | YY1 ChIP-Seq  | shEXO3         | Promoters       | 16202          | Non-Overlapping                 | Y             | Removed                 | per-bin per-region input subtraction     |
| 3C       | YY1 ChIP-Seq  | shEXO3         | Enhancers       | 10627          | All                             | Y             | Removed                 | per-bin per-region input subtraction     |
| 3C       | YY1 ChIP-Seq  | shEXO3         | SE Constituents | 646            | All                             | Y             | Removed                 | per-bin per-region input subtraction     |
| SF1B     | Oct4 ChIP-Seq | None           | Promoters       | 16202          | Non-Overlapping                 | Y             | Removed                 | None                                     |
| SF1B     | Oct4 ChIP-Seq | None           | Enhancers       | 10627          | All                             | Y             | Removed                 | None                                     |
| SF1B     | Oct4 Motifs   | None           | Promoters       | 16202          | Non-Overlapping                 | N, no density | Kept                    | None                                     |
| SF1B     | Oct4 Motifs   | None           | Enhancers       | 10627          | All                             | N, no density | Kept                    | None                                     |
| SF1B     | YY1 Motifs    | None           | Promoters       | 16202          | Non-Overlapping                 | N, no density | Kept                    | None                                     |
| SF1B     | YY1 Motifs    | None           | Enhancers       | 10627          | All                             | N, no density | Kept                    | None                                     |



|       |               |      |                 |       |                 |   |                         |                                          |
|-------|---------------|------|-----------------|-------|-----------------|---|-------------------------|------------------------------------------|
| SF2   | GRO-Seq       | None | Promoters       | 9709  | Transcribed     | Y | Removed                 | None                                     |
| SF2   | GRO-Seq       | None | Promoters       | 1118  | Not transcribed | Y | Removed                 | None                                     |
| SF2   | OCT4 ChIP-Seq | None | Promoters       | 9709  | Transcribed     | Y | Removed                 | None                                     |
| SF2   | OCT4 ChIP-Seq | None | Promoters       | 1118  | Not transcribed | Y | Removed                 | None                                     |
| SF2   | YY1 ChIP-Seq  | None | Promoters       | 9709  | Transcribed     | Y | Removed                 | None                                     |
| SF2   | YY1 ChIP-Seq  | None | Promoters       | 1118  | Not transcribed | Y | Removed                 | None                                     |
| SF2   | YY1 CLIP-Seq  | None | Promoters       | 9709  | Transcribed     | Y | Removed                 | None                                     |
| SF2   | YY1 CLIP-Seq  | None | Promoters       | 1118  | Not transcribed | Y | Removed                 | None                                     |
| SF5   | YY1 CLIP      | None | Promoters       | 16182 | Discard top 20  | Y | Removed if same barcode | Ctrl CLIP                                |
| SF5   | YY1 CLIP      | None | Enhancers       | 10607 | Discard top 20  | Y | Removed if same barcode | Ctrl CLIP                                |
| SF5   | Oct4 CLIP     | None | Promoters       | 16182 | Discard top 20  | Y | Removed if same barcode | Ctrl CLIP                                |
| SF5   | Oct4 CLIP     | None | Enhancers       | 10607 | Discard top 20  | Y | Removed if same barcode | Ctrl CLIP                                |
| SF10  | GRO-Seq       | None | Promoters       | 16202 | Non-Overlapping | Y | Removed                 | None                                     |
| SF10  | GRO-Seq       | None | Enhancers       | 10627 | All             | Y | Removed                 | None                                     |
| SF10  | GRO-Seq       | None | SE Constituents | 646   | All             | Y | Removed                 | None                                     |
| SF10  | GRO-Seq       | DRB  | Promoters       | 16202 | Non-Overlapping | Y | Removed                 | None                                     |
| SF10  | GRO-Seq       | DRB  | Enhancers       | 10627 | All             | Y | Removed                 | None                                     |
| SF10  | GRO-Seq       | DRB  | SE Constituents | 646   | All             | Y | Removed                 | None                                     |
| SF10  | YY1 ChIP-Seq  | None | Promoters       | 16202 | Non-Overlapping | Y | Removed                 | Mean input signal in each bin subtracted |
| SF10  | YY1 ChIP-Seq  | None | Enhancers       | 10627 | All             | Y | Removed                 | Mean input signal in each bin subtracted |
| SF10  | YY1 ChIP-Seq  | None | SE Constituents | 646   | All             | Y | Removed                 | Mean input signal in each bin subtracted |
| SF10  | YY1 ChIP-Seq  | DRB  | Promoters       | 16202 | Non-Overlapping | Y | Removed                 | Mean input signal in each bin subtracted |
| SF10  | YY1 ChIP-Seq  | DRB  | Enhancers       | 10627 | All             | Y | Removed                 | Mean input signal in each bin subtracted |
| SF10  | YY1 ChIP-Seq  | DRB  | SE Constituents | 646   | All             | Y | Removed                 | Mean input signal in each bin subtracted |
| SF10C | GRO-Seq       | None | Promoters       | 16202 | Non-Overlapping | Y | Removed                 | None                                     |
| SF10C | GRO-Seq       | None | Enhancers       | 10627 | All             | Y | Removed                 | None                                     |
| SF10C | GRO-Seq       | None | SE Constituents | 646   | All             | Y | Removed                 | None                                     |
| SF10C | GRO-Seq       | ActD | Promoters       | 16202 | Non-Overlapping | Y | Removed                 | None                                     |
| SF10C | GRO-Seq       | ActD | Enhancers       | 10627 | All             | Y | Removed                 | None                                     |
| SF10C | GRO-Seq       | ActD | SE Constituents | 646   | All             | Y | Removed                 | None                                     |
| SF10C | YY1 ChIP-Seq  | None | Promoters       | 16202 | Non-Overlapping | Y | Removed                 | Mean input signal in each bin subtracted |
| SF10C | YY1 ChIP-Seq  | None | Enhancers       | 10627 | All             | Y | Removed                 | Mean input signal in each bin subtracted |
| SF10C | YY1 ChIP-Seq  | None | SE Constituents | 646   | All             | Y | Removed                 | Mean input signal in each bin subtracted |
| SF10C | YY1 ChIP-Seq  | ActD | Promoters       | 16202 | Non-Overlapping | Y | Removed                 | Mean input signal in each bin subtracted |
| SF10C | YY1 ChIP-Seq  | ActD | Enhancers       | 10627 | All             | Y | Removed                 | Mean input signal in each bin subtracted |
| SF10C | YY1 ChIP-Seq  | ActD | SE Constituents | 646   | All             | Y | Removed                 | Mean input signal in each bin subtracted |
| SF10D | YY1 ChIP-Seq  | None | Promoters       | 16202 | Non-Overlapping | Y | Removed                 | Mean input signal in each bin subtracted |
| SF10D | YY1 ChIP-Seq  | None | Enhancers       | 10627 | All             | Y | Removed                 | Mean input signal in each bin subtracted |
| SF10D | YY1 ChIP-Seq  | None | SE Constituents | 646   | All             | Y | Removed                 | Mean input signal in each bin subtracted |
| SF10D | YY1 ChIP-Seq  | THZ1 | Promoters       | 16202 | Non-Overlapping | Y | Removed                 | Mean input signal in each bin subtracted |
| SF10D | YY1 ChIP-Seq  | THZ1 | Enhancers       | 10627 | All             | Y | Removed                 | Mean input signal in each bin subtracted |
| SF10D | YY1 ChIP-Seq  | THZ1 | SE Constituents | 646   | All             | Y | Removed                 | Mean input signal in each bin subtracted |
| SF10D | YY1 ChIP-Seq  | TPI  | Promoters       | 16202 | Non-Overlapping | Y | Removed                 | Mean input signal in each bin subtracted |
| SF10D | YY1 ChIP-Seq  | TPI  | Enhancers       | 10627 | All             | Y | Removed                 | Mean input signal in each bin subtracted |
| SF10D | YY1 ChIP-Seq  | TPI  | SE Constituents | 646   | All             | Y | Removed                 | Mean input signal in each bin subtracted |

### Statistical tests for change in binding

$p$ -values were calculated by comparing the distributions of values of drug-treated and control sequencing samples using one-tailed Student's  $t$ -test unless otherwise noted. Values were calculated using one value per sample for the whole displayed region.

### Heatmap analysis

16,202 promoters (described above) and 10,627 enhancers (described above) were used for heatmap analysis in fig. S1C. RPM-normalized read densities per region were calculated using bamToGFF (-d -r). Regions are ordered by ChIP-seq values and visualized using heatmap.2 in R.

### Read distribution analysis

For fig. S4, reads were categorized by the type of region they fell into: enhancer (+/- 2kb around the center of 10,627 OSN sites, described above), promoter (+/- 2kb around 16,202 filtered RefSeq transcription start site, described above), RefSeq intron, RefSeq exon, other. Reads that fell in multiple categories of DNA regions were sorted into the most former category on this list. Reads were categorized using bedtools intersect (40) and the amount of genome in each category was calculated using bedtools subtract. To normalize read counts, we divided the number of reads falling in a category of region by the total number of DNA bases in all regions of that type.

### Global run-on sequencing (GRO-seq) sample preparation

GRO-seq analysis for Fig. 1, B and C, fig. S1A, fig. S2, and fig. S4 was performed as described in (3).

GRO-seq for fig. 3B, S10B, and S10C was performed as described previously (5) by using  $1 \times 10^8$  bio-YY1 mESCs. Briefly, the nuclei were isolated first, and then *in vitro* nuclear run-on assay was performed with Br-UTP. The nascent RNA was labeled with Br-UTP, hydrolyzed with NaOH, and purified with anti-BrdU agarose beads (Santa Cruz

Biotech). The purified nascent RNA was then phosphorylated and polyA tail was added at the 3' end. Subsequently, the RNA was reverse transcribed, and the cDNA was purified through gel extraction and circularized by CirLigase. The circular single-stranded DNA was linearized by APE 1 endonuclease, and PCR amplified. The final PCR product was purified and sequenced on the Illumina HiSeq 2000.

### Global run-on sequencing (GRO-seq) analysis

Once sequenced, the 40bp GRO-seq reads used in Fig. 1C and fig. S1A were first filtered off ribosomal RNAs using SortmeRNA (41) with the eukaryote rRNA databases to account for rRNA genes in the proximity of *Arid1a*. Reads used in metagenes in Fig. 1B, S2, S4 were not filtered in this manner. Both filtered and unfiltered reads were then trimmed at their 3' ends to remove residual sequencing adaptor sequences, and trimmed reads over 24bp were aligned to the mm9 version of the mouse genome using Bowtie 0.12.9 (30) as described in (3). Reads having a Phred score quality under 33 or aligning to more than 10 locations in the genome were discarded, and only the best mapping location was retained for each read. A high number of reads mapping to chr17:39979942-39985774 + strand region encoding a 45S rRNA precursor not entirely contained in the eukaryote rRNA database were additionally removed. Reads aligning to the + or - strand of the genome were respectively separated into Watson and Crick strand read containing files and wiggle tracks were generated for each file using bedtools (40). Wig format wiggle files were converted into BigWig format with wigToBigWig (42) and uploaded for visualization in the UCSC genome browser (32).

Untreated and ActD-treated GRO-seq reads in fig. S10C were trimmed at the 3 end at the sequence TGG AATTCTCGGGTGCCAAGGAACTCCAGTCAC using cutadapt -m 18. Trimmed reads were aligned with bowtie with parameters -p 20 -n 2 -S -k 1 -m 1 -best and these reads were discarded in favor of those that had polyA tails. PolyA tails for unmapped reads were trimmed using prinseq -trim\_tail\_right 1 (28). PolyA-trimmed

reads were aligned using bowtie -n 2 -S -k 1 -m 1 -best to retain reads that could be uniquely mapped. GRO-seq reads used in Fig. 3B and fig. S10B are from (24).

#### Affinity purification and sequencing of YY1-associated RNA (YY1 CLIP-seq)

CLIP-seq was performed as previously described (43) with the following modifications. Bio-YY1 ESCs and control ESCs expressing only biotin ligase *BirA* were grown in 15-cm plates. Each plate was washed twice with 30 ml of ice-cold PBS, and UV-crosslinking was conducted with 254 nm UV light when plates were placed on ice with lids off at 400 mJ/cm<sup>2</sup>. Cells were scraped off each plate and collected in 15-ml Falcon tubes. Nuclei were purified using Nuclei EZ Prep nuclei isolation kit (Sigma) and flash frozen until ready to use. Three 15-cm plates (~1.5x10<sup>8</sup> cells) of ESCs were used for each experiment. 50  $\mu$ l of Dynabeads® MyOne Streptavidin T1 was used for each 0.5x10<sup>8</sup> cells. Beads were washed thrice with PBS, twice with DEPC-treated 0.1M NaOH, 0.05M NaCl, and once with DEPC-treated 0.1M NaCl. After blocking the beads with sterile-filtered blocking buffer (0.5% BSA in PBS) for 30 min at 4°C, beads were kept on ice in 100  $\mu$ l of the lysis buffer (1xPBS, 0.1% SDS, 0.5% sodium deoxycholate, 0.5% NP-40, 1 mM DTT, cOmplete EDTA-free protease inhibitor cocktail (Roche)) until ready to use.

Each aliquot of 0.5x10<sup>8</sup> cells was thawed on ice and resuspended in 1 ml of the lysis buffer in 1.5 ml tubes. Cells were passed three times through the 26" needle to reduce viscosity, and tubes were rotated for 10 min at 4°C to complete the lysis. 30  $\mu$ l of RQ1 RNase-free DNase (Promega) and 1  $\mu$ l of RNase I (Life Technologies, 100U/ $\mu$ l) were added to each 1 ml of lysate and tubes were incubated at 37°C for 15 min in the ThermoMixer C (Eppendorf) (rock for 15 sec at 1,200 rpm, 75 sec off). RNase digestion was stopped by transferring the tubes to ice and adding 25  $\mu$ l Supersaseln RNase Inhibitor (Life Technologies, 20U/ $\mu$ l) to each aliquot of 0.5x10<sup>8</sup> cells. Lysates were cleared up by centrifugation at 20,000g for 10min at 4°C, supernatants were added to the beads, and rotated overnight at 4°C. 2% of the supernatant was saved as input for Western blot analysis.

At the end of incubation, beads were washed twice by rotating them for 5 min each time with 1 ml of ice-cold wash buffer 1 containing 50mM Tris-HCl, pH 7.4, 1mM EDTA, 1M NaCl, 0.1% SDS, 1% NP-40, 1mM DTT, 10u/ml SupraseIN, and cOmplete protease inhibitor followed by two washes (each for 5 min at 4°C) with 1 ml of wash buffer 2 containing 50mM Tris-HCl, pH 7.4, 1mM EDTA, 300mM NaCl, 0.1% SDS, 1% NP-40, 1mM DTT, 10u/ml SupraseIN, and cOmplete protease inhibitor. The second DNase-treatment was conducted by incubating beads in 50- $\mu$ l reaction in presence of 5  $\mu$ l of 10X TurboDNase buffer and 2  $\mu$ l of TurboDNase (2u/ $\mu$ l) (Life Technologies) for 25 min at 37°C in the ThermoMixer C (rock for 15 sec at 1,000 rpm, 90 sec off). Beads were washed twice by rotating them for 5 min each time with 1 ml of ice-cold wash buffer 1 containing 50mM Tris-HCl, pH 7.4, 1mM EDTA, 500mM NaCl, 0.1% SDS, 1% NP-40, 1mM DTT, 10u/ml SupraseIN, and cOmplete protease inhibitor followed by two washes with 1 ml of wash buffer 2, two washes with 1 ml of RIPA-S buffer containing 50mM Tris-HCl pH 7.4, 1M NaCl, 2M Urea, 0.5% NP-40, 1% sodium deoxycholate, 5 mM EDTA, 0.1% SDS, 1mM DTT, and two washes with 1 ml of PNK buffer containing 50mM Tris-HCl pH 7.4, 10 mM MgCl<sub>2</sub>, and 0.5% NP-40. Beads were resuspended in 1000  $\mu$ l of PNK buffer and 100  $\mu$ l of the beads was transferred to a clean tube. After removal of the PNK buffer, these beads were resuspended in 30 $\mu$ l of PNK labeling mix containing 3  $\mu$ l of 10X PNK buffer (NEB), 1  $\mu$ l of T4 PNK (NEB) and 1  $\mu$ l of ATP, g-<sup>32</sup>P (Perkin Elmer, NEG035C001MC) and incubated for 20 min at 37°C in the ThermoMixer C (rock for 15 sec at 1,000 rpm, 90 sec off). Labeling mix was removed and beads were washed three times with 50mM Tris-HCl, pH 7.4, 1mM EDTA, 150mM NaCl, 0.1% SDS, 1% NP-40, 1mM DTT. Unlabeled 900- $\mu$ l worth of beads was washed in the same manner. Labeled RNA species cross-linked to YY1 were eluted off beads by incubating beads for 10 min at 95°C in 20  $\mu$ l of 1X NuPage LDS sample buffer (Life technologies) in presence of 10mM DTT. Of the remaining 900  $\mu$ l of unlabeled beads, 100  $\mu$ l was used for Western blot analysis, and protein-RNA complexes were eluted off the remaining beads in 40  $\mu$ l of 1X NuPage LDS sample buffer, 10mM DTT. Protein-RNA complexes were separated on a 10% Criterion XT Bis-Tris gel (Bio-Rad) and transferred to nitrocellulose membrane (Bio-Rad) for 2hrs (250mA) at 4°C. Samples for Western

blot analysis were resolved on SDS-PAGE and transferred to another membrane in parallel with the CLIP samples. After transfer, membrane was rinsed with TBS buffer, wrapped in Saran Wrap and exposed to film. Regions slightly above the radioactive band corresponding to YY1 protein based on results of the Western blot analysis, were excised from the membrane, sliced into thin strips, and transferred to 2ml tubes. RNA was isolated in the following way: 400  $\mu$ l of proteinase K buffer containing 100mM Tris-HCl pH 7.4, 50mM NaCl, 10mM EDTA and 4 mg/ml proteinase K (20mg/ml) (Life Technologies) was added to the tubes, which were rocked for 40 min at 37°C in the ThermoMixer C at 1,200 rpm. Once 400  $\mu$ l of PKU buffer containing 100mM Tris-HCl pH 7.4, 50mM NaCl, 10mM EDTA, 7M Urea was added to the tubes, they were incubated for another 40 min at 37°C in the ThermoMixer C at 1,200 rpm. Liquid fraction was transferred to a fresh 2ml tube, 800  $\mu$ l of phenol:chlorophorm:isoamyl alcohol (25:24:1 v/v) pH 8.0 (Sigma) was mixed with it and loaded to MaxTract High Density tubes (Quagen). After centrifugation at 16,000g for 5 min, aqueous phase was transferred to two clean tubes and RNA was precipitated in presence of 0.3 M sodium acetate, 1  $\mu$ l of GlycoBlue (Life Technologies) and 3X volume of 100% ethanol at -20°C overnight. Precipitated RNA pellets were washed with 70% ethanol and dried. At this point, UV-crosslinked RNA purified from all  $1.5 \times 10^8$  cells was pulled from all six tubes and resuspended in 10  $\mu$ l of RNase-free H<sub>2</sub>O. RNA was dephosphorylated in a 20- $\mu$ l reaction containing 70mM Tris-HCl pH 6.5, 10mM MgCl<sub>2</sub>, 5mM DTT, 0.5  $\mu$ l SuperaseIN, and 2  $\mu$ l PNK (NEB) at 37°C for 1 hr. After phenol/chloroform extraction, RNA was ethanol precipitated and resuspended in 13  $\mu$ l H<sub>2</sub>O. RNA was denatured by incubation at 70°C for 2 min and kept on ice until ready to use. Subsequently, adapter with sequence /5rApp/TG GAA TTC TCG GGT GCC AAG G/3ddC/ was ligated to the 3' end of the RNA in a 20 $\mu$ l reaction containing 20 $\mu$ M adapter, 1xRNA ligase buffer, 2  $\mu$ l PEG 8000, and 2  $\mu$ l truncated RNA ligase (NEB, M0373) at 16°C overnight. Reactions were ethanol precipitated and reverse transcription of the RNA was conducted using SuperScript III reverse transcriptase (Life Technologies) at 55°C for 1hr using RT primer [Phos]ANNNNagatcGGAAGAGCGTCGTGTAGGGAAAGAGTGT[Sp-C18]CACTCA[Sp-C18]CCTTGGCACCCGAGAATTCCA. Subsequently, RNA was removed by treating the

sample with 1  $\mu$ l RNase H and 1  $\mu$ l (0.3 mg/ml) RNase A at 37°C for 20 min. After phenol/chloroform extraction, cDNA was ethanol precipitated and resuspended in 10  $\mu$ l H<sub>2</sub>O.

cDNA denatured in presence of gel loading dye II (Life Technologies) at 70°C for 3 min was separated from the adapter and the RT primer on a 10% TBE-Urea polyacrylamide gel (10 Watts, 1.5-2hrs). Gel was stained with SYBR Gold Nucleic Acid Stain (Life Technologies) and area corresponding to 100-200nt was excised from the gel. Excised gel fragments were further fragmented and cDNA was eluted in buffer containing 0.5M NaCl and 1mM EDTA by rotating tubes at room temperature overnight. Gel slurry was transferred to a Costar Spin-X 0.22 $\mu$ m column (Corning, 8161) and spun at 8,000g for 3min. cDNA was consequently ethanol precipitated, resuspended in 8 $\mu$ l H<sub>2</sub>O, and circularized in presence of 1  $\mu$ l CircLigase II buffer, 0.5  $\mu$ l MnCl<sub>2</sub> and 0.5  $\mu$ l CircLigaseII (Epicentre, CL9021K) by incubating the cDNA at 60°C for 1hr. After CircLigaseII heat inactivation at 80°C for 10 min, DNA was ethanol precipitated and resuspended in 21  $\mu$ l H<sub>2</sub>O. 5 $\mu$ l of the DNA was used as a template in each of two 50- $\mu$ l PCR reactions using Phusion High Fidelity DNA polymerase (NEB, M0530) (7 cycles, empirically determined) and the following primers:

DSFP5 (Aatgatacggcgaccaccgagatctacactctttccctacacgacgctcttcc) and the following bar-coded primers:

DSFP3\_1 for control *BirA* sample

CAAGCAGAAGACGGCATACGAGATCGTGATCGGTCCTTGGCACCCGAGAATTCCA

DSFP3\_2 for bio-YY1 sample

CAAGCAGAAGACGGCATACGAGATACATCGCGGTCCTTGGCACCCGAGAATTCCA

PCR products were ethanol precipitated and separated on a 10% TBE-Urea polyacrylamide gel. After gel staining with SYBR Gold, 150-250nt gel fragments were excised from a gel and DNA was eluted by incubating gel pieces in 0.5M NaCl and 1mM

EDTA by rotating tubes at room temperature overnight. DNA was ethanol precipitated and resuspended in 10  $\mu$ l H<sub>2</sub>O. After diluting the DNA ten-fold, 1  $\mu$ l of the diluted DNA was used as a template in the next round of 15 cycles of PCR for bio-YY1 sample and 25 cycles of PCR for control *BirA* sample using either Phusion High-Fidelity DNA polymerase or GoTaq DNA polymerase (Promega) and the following primers: AATGATACGGCGACCACC and CAAGCAGAAGACGGCATAC. PCR products were resolved on 2% Agarose Resolute GPG gel (American Bioanalytical), isolated from a gel, and PCR products synthesized using GoTaq DNA polymerase was cloned into TOPO-TA vector (Life Technologies) and resulting plasmid was subjected to Sanger sequencing to confirm complexity of the insert. PCR product obtained using Phusion High Fidelity DNA polymerase was subjected to high-throughput sequencing on Illumina High-Seq genome analyzer. Insert sequencing primer was CTCTTTCCCTACACGACGCTCTTCCGATCT and barcode sequencing primer was TGGAATTCTCGGGTGCCAAGGACCG.

OCT4 CLIP-seq was conducted similarly to YY1 CLIP-seq using bio-OCT4 mESCs described in (26).

### YY1 CLIP-seq analysis

CLIP-Seq reads were processed in a manner adapted from (43). Cutadapt (44) was used to trim the sequence TGGAATTCTCGGGTGCCAAGG off of the 3' end of CLIP-Seq reads with parameter  $-m$  18. First, bowtie was used to map trimmed reads to the mm9 mouse genome with parameters  $-best -strata -m1 -n 2 -5 5 -p 50 -S$ . Bowtie2 (45) was used to map those reads bowtie failed to map (accounting for deletions caused by UV crosslinking) with parameters  $-5 5 -sensitive -p 50$ . The resulting bowtie and bowtie2 mappings were combined and used for downstream analysis.

Multiple reads were collapsed to one if they had the same chromosome, start, end, and first four nucleotides (barcode) to account for PCR duplicates. RepeatMasker regions



for mm9 were downloaded from the UCSC Genome Browser and subsetted for rRNA repeats. Reads contacting these regions were discarded. Remaining reads were separated into + and – strand reads using samtools view (46). Enriched regions and WIG files were created on strand-separated mapping files using MACS with parameters –w –S –space=50 –nomodel –shiftsize=40 –keep-dup=1. Peaks identified separately on reads mapping to each strand were concatenated and used for Figure S3. Peaks were required to have at least one read mapped with bowtie2.

#### Purification and determination of concentration of the recombinant YY1

YY1 protein was purified using a method modified from (15). Briefly, a plasmid containing the N-terminal His<sub>6</sub>-tagged YY1 coding sequence (a gift from Dr. Yang Shi) was transformed into BL21-CodonPlus (DE3)-RIL cells (Stratagene, 230245). A fresh bacterial colony was inoculated into LB media containing ampicillin and chloramphenicol and grown overnight at 37°C. Bacteria were pelleted, resuspended in 500ml of fresh pre-warmed LB media, and grown for 1.5 hours at 37°C. After induction of YY1 expression with 1mM IPTG, cells were grown for another 5 hours, collected, and stored frozen at -80°C until ready to use.

Pellets were resuspended in 5ml of Buffer A (6M GuHCL, 25mM Tris, 100mM NaCl, pH8.0) containing 10mM imidazole, 5mM 2-mercaptoethanol, and cOmplete protease inhibitors (Roche) and sonicated (ten cycles of 15 seconds on, 60 sec off). The lysate was cleared by centrifugation at 13,000g for 20 minutes at 4°C, 1ml of Ni-NTA agarose (Invitrogen, R901-15) pre-equilibrated with 10X volumes of buffer A was added to the cleared lysate, and tubes containing agarose lysate slurry were rotated at room temperature for 1 hour. The agarose slurry was poured into a column, and packaged agarose was washed with 15x volumes of Buffer A containing 10mM imidazole and 5mM DTT. Protein was eluted with 3ml Buffer A containing 500mM imidazole and 5mM DTT.

After adjusting the concentration of ZnCl<sub>2</sub> and DTT in the elution buffer to 0.1mM and 100mM, respectively, the purified protein was denatured at 60°C for 30 minutes and refolded by dialyzing it against 600 ml of the dialysis buffer containing 25mM Tris-HCl pH 8.5, 100mM NaCl, 10mM MgCl<sub>2</sub>, 0.1mM ZnCl<sub>2</sub>, and 5mM DTT at 4°C changing the buffer three times. At the end of the dialysis, precipitated material was removed by centrifugation at 1,800g for 15 minutes at 4°C. Soluble fraction was dialyzed against 600ml of the dialysis buffer containing 1mM DTT and 10% glycerol at 4°C changing the buffer three times. At the end of the dialysis, protein was stored in aliquots at -80°C.

Based on A260 to A280 ratio, less than 4% of protein is associated with nucleic acid. HPLC chromatograph does not show presence of soluble YY1 aggregate. Recombinant YY1 behaves similarly to endogenous YY1 in nuclear extract EMSA assays as shown in fig. S6 and S7.

Concentration of the full-length YY1 in the final protein preparation was determined by first resolving serial dilutions of BCA standard alongside YY1 on a 10% SDS-PAGE gel. Resolved proteins were then stained with the Bio-Safe Coomassie Stain (Bio-Rad), and YY1 amount was estimated by densitometry of the corresponding Coomassie-stained YY1 band relative to the BCA standards using ChemiDoc XRS+ system with Image Lab software (Bio-Rad).

The N-terminal (amino acids 1-277) and C-terminal (amino acids 271-420) portions of YY1 were purified in a fashion similar to the full-length YY1.

#### *RNase treatment and YY1 chromatin binding assay*

Chromatin binding assay was modified from a published protocol (47). Nuclei were prepared using hypotonic buffer and then half of the purified nuclei was left untreated (control), whereas another half was treated with 1: 100 dilution of RNase A (Sigma, R4642) for 10 min at 37 °C. After washing, both untreated and RNase A-treated nuclei were digested with 1:10 dilution of DNase I (Promega, M6101) in presence of (NH<sub>4</sub>)<sub>2</sub>SO<sub>4</sub>

at 37 °C for 30 min to isolate soluble chromatin fraction. The supernatants (soluble chromatin fraction) were then analyzed by Western blotting.

### Electrophoretic mobility shift assay (EMSA)

EMSA was performed essentially as described in (48). To prepare nuclear extracts (NE), bio-YY1 mESCs were depleted of MEFs. Cells were then washed twice in cold PBS, collected, and resuspended in 5 ml ice-cold hypotonic lysis buffer (20 mM HEPES, pH 7.4, 20% glycerol, 10 mM NaCl, 1.5 mM MgCl<sub>2</sub>, 0.2 mM EDTA, 0.1% Triton X-100, 0.5 mM dithiothreitol, 1 mM phenylmethylsulfonyl fluoride) in presence of cOmplete proteinase inhibitor. After 10 min incubation on ice, nuclei were spun down, resuspended in 0.5 ml of nuclear extraction buffer (hypotonic lysis buffer plus 420 mM NaCl) and rotated for 1 hr at 4°C. Supernatants were then clarified by centrifugation, aliquoted, and stored at –80°C. Protein concentrations were determined using the BCA protein assay (Life Technologies).

Oligonucleotide DNA probes containing YY1 binding sites were generated by first annealing 30-nt single-stranded oligonucleotides to obtain 100 μM stock of double-stranded oligonucleotides, and by then labeling 10 pmol of this stock with T4 polynucleotide kinase (New England Biolabs) and [ $\gamma$ -<sup>32</sup>P]-ATP (Perkin Elmer). DNA-RNA chimeric oligonucleotides used in the tethering experiments were annealed and labeled in a similar way. The 30-nt single-stranded RNA probes were labeled in the same way as the DNA probes. Unincorporated [ $\gamma$ -<sup>32</sup>P]-ATP was removed using G-25 spin columns (Roche). Labeled stocks were further diluted to obtain 0.1 μM stocks of labeled nucleic acids, 1 μl of which was used in the binding reactions.

EMSA with NE were performed as follows: DNA-binding reactions (20 μl) containing 20 mM HEPES-KOH, pH 7.5, 105 mM NaCl, 1.5 mM MgCl<sub>2</sub>, 0.2 mM EDTA, 0.02% Triton X-100, 5% glycerol, 0.5 mM dithiothreitol, 500 ng poly(dI-dC), and 10 μg nuclear extract were pre-incubated with or without specific competitor (100-fold excess) at room temperature for 20 min. Following pre-incubation, 0.1 pmol of radiolabeled DNA probe was added to the reaction mixtures and incubation continued for another 80 min. Each

reaction mixture was then mixed with Triple Dye Loading Buffer (National Diagnostics), loaded onto a native 5% polyacrylamide gel (acrylamide:bis, 39:1, National Diagnostics) containing 0.5× TBE and 1% glycerol, and electrophoresed in 0.5× TBE at 300 V for 10 min at room temperature, followed by at 250 V for 75 min at 4°C for. After electrophoresis, the gels were dried at 80°C for 50 min and exposed to a phosphorimager screen (Fuji). For antibody super-shift assays, NEs were first incubated with radiolabeled DNA probe for 20 min before 0.5 µl of the YY1 antibody was added to the reaction mixtures and incubation continued for another 80 min.

EMSAs with the recombinant YY1 were performed in a similar way as those with the NE. DNA-binding reactions (20 µl) contained 10 mM HEPES-KOH pH 7.5, 12 mM Tris-HCl pH 7.4, 50 mM NaCl, 50 mM KCl, 5 mM MgCl<sub>2</sub>, 0.1 mM ZnCl<sub>2</sub>, 0.01% NP-40, 5% glycerol, 500 ng poly(dI-dC), 0.5 mM DTT, and recombinant YY1. RNA-binding reactions (20 µl) contained 10 mM HEPES-KOH pH 7.5, 12 mM Tris-HCl pH 7.4, 50 mM NaCl, 50 mM KCl, 5 mM MgCl<sub>2</sub>, 0.1 mM ZnCl<sub>2</sub>, 0.01% NP-40, 5% glycerol, 10 U SUPERase In RNase inhibitor (Life Technologies), 0.5 mM DTT, and recombinant YY1.

#### DNA oligonucleotides used as probes and competitors in EMSA

*Rpl30* promoter with YY1 motif (labeled DNA probe in fig. S6, A and B, S7C, S14, A to C, and S15, A and B; cold specific competitor in fig. S6B, cold DNA competitor 3 in fig. S8C, and a part of cold competitor 2 in fig. S15, A and B):

Forward 5´-TCGCTCCCCGGCCATCTTGGCGGCTGGTGT-3´

Reverse 5´- ACACCAGCCGCCAAGATGGCCGGGGAGCGA-3

*Rpl30* promoter with no YY1 motif (labeled probe in fig. S6A and cold non-specific competitor in fig. S6B):

Forward 5´- AGGCAGTGGcTAgcTcaCGTCCCTGGATCG-3´

Reverse 5' - CGATCCAGGGACGtgAgCTaGCCACTGCCT-3'

*Arid1a* promoter with YY1 motif (labeled DNA probe in Fig. 2, A and B, fig. S6A, S7B, and S9B; cold competitor in fig. S7B and DNA competitor 2 in fig. S7C):

Forward 5' -CTCTTCTCTCTTAAAATGGCTGCCTGTCTG- 3'

Reverse 5' -CAGACAGGCAGCCATTTTAAAGAGAGAAGAG- 3'

*Arid1a* promoter with no YY1 motif (labeled DNA probe in fig. S6A; cold non-specific competitor in fig. S7B):

Forward 5' -CCCGCCTCCCCAGGCCTACGCGCTGAGCTC -3'

Reverse 5' -GAGCTCAGCGCGTAGGCCTGGGGAGGCGGG -3'

*Lefty1* enhancer (labeled DNA probe in fig. S5B and cold DNA competitor in fig. S5B):

Forward 5' - GGTGGGAGGGAGACTGCCCTTTGTCATGTAGAAGGAGCTT-3'

Reverse 5' - AAGCTCCTTCTACATGACAAAGGGCAGTCTCCCTCCCACC -3'

mut *Lefty1* enhancer (cold DNA competitor in fig. S5B):

Forward 5' -ACGTGCAGGGAGACTGCCCTTTGTCATGTAGAAGCAGTTG -3'

Reverse 5' -CAACTGCTTCTACATGACAAAGGGCAGTCTCCCTGCACGT -3'

#### RNA oligonucleotides used as probes and competitors in EMSA

*Arid1a* promoter RNA **A** (labeled probe in Fig. 2, A and B, in fig. S5B, S7, A to C, S9C, and as a part of probe 2 in fig. S14, A to C; cold competitor in fig. S5B, S7C, S8, B and C, a part of probe 3 in fig. S14, A to C, and a part of cold competitor 1 and 2 in fig. S15, A and B):

5' -rCrUrCrUrUrCrUrCrUrCrUrUrArArArArUrGrGrCrUrGrCrCrUrGrUrCrUrG-3'

*Arid1a* promoter RNA **1** (labeled probe in fig. S8A; cold competitor in fig. S8B):

5´ - rCrArGrArCrArGrGrCrArGrCrCrArUrUrUrUrArArGrArGrArGrArArGrArG -3´

*Arid1a* promoter RNA **B** (cold competitor in fig. S8, B and C):

5´ - rCrCrCrGrCrCrUrCrCrCrCrArGrGrCrCrUrArCrGrCrGrCrUrGrArGrCrUrC -3´

*DNA-RNA chimeric oligonucleotides used in in vitro tethering experiments*

*Rpl30* promoter with YY1 motif – *Arid1a* promoter RNA (labeled probe 2 in fig. S14, A to C; cold competitor 1 in fig. S15, A and B):

Forward 5´ -

**TCGCTCCCCG****GCCATCTTG****GCGGCTGGTGT**rCrUrCrUrUrCrUrCrUrCrUrUrArArArArU  
rGrGrCrUrGrCrCrUrGrUrCrUrG -3´

Reverse 5´ -

**ACACCAGCCG****CAAGATGG****CCGGGGAGCGA**rCrUrCrUrUrCrUrCrUrCrUrUrArArArA  
rUrGrGrCrUrGrCrCrUrGrUrCrUrG-3´

*Competition EMSA: in vitro RNA tethering experiments*

For competition EMSA in fig. S15, single-stranded DNA-RNA chimeric oligonucleotides were annealed to obtain 50µM stock of the 30-bp *Rpl30* DNA containing 30-nt *Arid1a* RNA overhang on each 3´ end (competitor 1) and its serial dilutions immediately before the experiment. Thus, each molecule of competitor 1 contained three potential binding sites for YY1: one in DNA, and two in RNA. Competitor 2 was obtained by first annealing complementary single-stranded *Rpl30* DNA oligonucleotides to obtain 100µM stock of 30-bp *Rpl30* DNA, and by then mixing this stock with *Arid1a* promoter RNA to

obtain a final stock, which consisted of 50 $\mu$ M 30-bp *Rpl30* DNA and 100 $\mu$ M 30-nt *Arid1a* RNA. Thus, for each molecule of DNA, there were two molecules of RNA, which added up to three potential YY1 binding sites, as was the case in the competitor 1. The stock of the competitor 2 was further serially diluted before each experiment.

Binding reactions (20  $\mu$ l) containing 10 mM HEPES-KOH pH 7.5, 12 mM Tris-HCl pH 7.4, 50 mM NaCl, 50 mM KCl, 5 mM MgCl<sub>2</sub>, 0.1 mM ZnCl<sub>2</sub>, 0.01% NP-40, 5% glycerol, 10 U SUPERase In RNase inhibitor (Life Technologies), 0.5 mM DTT, 500 ng poly(dI-dC), and recombinant YY1 were pre-incubated with or without different concentrations of either competitor 1 or competitor 2 at room temperature for 20 min. Following pre-incubation, 0.1 pmol of radiolabeled DNA probe was added to the reaction mixtures and binding reactions were incubated for another 80 min. Each reaction mixture was then mixed with Triple Dye Loading Buffer (National Diagnostics) and loaded onto a native 5% polyacrylamide gel (acrylamide:bis, 39:1, National Diagnostics) containing 0.5 $\times$  TBE and 1% glycerol and electrophoresed in 0.5 $\times$  TBE at 300 V for 10 min at room temperature, followed by electrophoresis at 250 V for 75 min at 4°C for. After electrophoresis, the gels were dried at 80°C for 50 min and exposed to a phosphorimager screen (Fuji). Screen were scanned using Typhoon FLA 9500 (GE Healthcare Life Sciences) and quantified using ImageQuant TL software (GE Healthcare Life Sciences). Graph in fig. 15B was created and IC<sub>50</sub> values were estimated using Prism 6 software. Error bars represent standard deviation from the mean value for each data point obtained in at least three replicates. Values were fit using non-linear regression function in the Prism program. The *p*-value for differences between log<sub>10</sub>IC<sub>50</sub> values was calculated using the two-tailed *t*-test taking into account number of biological replicates for each data point.

#### Generation of stable mESC lines for in vivo tethering experiments

Genome editing was performed using CRISPR/Cas9 essentially as described (49, 50).

Lentiviral plasmid pHAGE-TRE-dCas9 containing tetracycline-inducible dCas9 and lentiviral stuffer plasmid pLKO.1-puro U6 sgRNA *BfuAI* were obtained from Addgene (50915 and 50920, respectively).

Target-specific DNA oligonucleotides were annealed and cloned into the pLKO.1-puro U6 sgRNA *BfuAI* plasmid digested with *BfuAI* to obtain pLKO.1-puro U6 sg*Suz12*, pLKO.1-puro U6 sg*Klf5*, pLKO.1-puro U6 sg*E2f3*, pLKO.1-puro U6 sg*Nufip2*, pLKO.1-puro U6 sg*Cnot6*, and pLKO.1-puro U6 sg*Pias1* plasmids. The genomic sequences complementary to guide RNAs are GTACTGGCTGCTCAAATGTC for *Suz12* enhancer, GTGATGTAGGTATAATTAGCC for *Klf5* enhancer, TTGCATGTTGTTCTCGGAGC for *E2f3* enhancer, CCATGTATGGTTACGGGGATC for *Nufip2* enhancer, GCTGAAAGACCACAGCTCCC for *Cnot6* enhancer, and TTGGGTGTTGAGAATAGGTCC for *Pias1* enhancer. Constructs for targeting the RNA tethering constructs to the six enhancers were ordered from Integrated DNA Technologies as gBlocks and cloned into the pLKO.1-puro U6 sgRNA *BfuAI* plasmid digested with *NdeI* and *EcoRI* to obtain pLKO.1-puro U6 sg*Suz12*-tracrRNA-*Arid1a* RNA **A** and pLKO.1-puro U6 sg*Suz12*-tracrRNA-*Arid1a* RNA **B** constructs, pLKO.1-puro U6 sg*Cnot6*-tracrRNA-*Arid1a* RNA **A** and pLKO.1-puro U6 sg*Cnot6*-tracrRNA-*Arid1a* RNA **B** constructs, pLKO.1-puro U6 sg*E2f3*-tracrRNA-*Arid1a* RNA **A** and pLKO.1-puro U6 sg*E2f3*-tracrRNA-*Arid1a* RNA **B** constructs, pLKO.1-puro U6 sg*Klf5*-tracrRNA-*Arid1a* RNA **A** construct, pLKO.1-puro U6 sg*Nufip2*-tracrRNA-*Arid1a* RNA **A**, and pLKO.1-puro U6 sg*Pias1*-tracrRNA-*Arid1a* RNA **A**, in which *Arid1a* RNA **A** is the RNA compatible with YY1 binding *in vitro*, and *Arid1a* RNA **B** is the RNA incompatible with YY1 binding.

Puromycin-resistance (*pac*) gene in all targeting plasmids was then replaced with hygromycin B-resistance gene (HygR) by first amplifying HygR gene from pLVX-Tet-On Advanced vector (Clontech) using Phusion High-Fidelity DNA polymerase (NEB), digesting it with *BamHI* and *KpnI* restriction enzymes, and then cloning the digested PCR product into the targeting plasmids digested with the same restriction enzymes to obtain pLKO.1-hygro U6 sg*Suz12*-tracrRNA-*Arid1a* RNA **A** and pLKO.1-hygro U6



sg*Suz12*-tracrRNA-*Arid1a* RNA **B** constructs, pLKO.1-hygro U6 sg*Cnot6*-tracrRNA-*Arid1a* RNA **A** and pLKO.1-hygro U6 sg*Cnot6*-tracrRNA-*Arid1a* RNA **B** constructs, pLKO.1-hygro U6 sg*E2f3*-tracrRNA-*Arid1a* RNA **A** and pLKO.1-hygro U6 sg*E2f3*-tracrRNA-*Arid1a* RNA **B** constructs, pLKO.1-hygro U6 sg*Klf5*-tracrRNA-*Arid1a* RNA **A** construct, pLKO.1-hygro U6 sg*Nufip2*-tracrRNA-*Arid1a* RNA **A**, and pLKO.1-hygro U6 sg*Pias1*-tracrRNA-*Arid1a* RNA **A** plasmids.

pHAGE-TRE-dCas9 DNA and each of the targeting plasmids were packaged into lentivirus by transfecting the corresponding plasmids into the HEK 293FT cells (Life Technologies) using Lipofectamine 2000 transfection reagent (Life Technologies) in the presence of packaging plasmids.

mESCs expressing bio-YY1 (25) were depleted of MEFs and transduced with the lentivirus for the expression of dCas9 and each of the targeting RNA constructs. Selection for cells expressing both dCas9 and each of the targeting constructs was conducted in the presence of 500  $\mu\text{g/ml}$  of geneticin (Life Technologies, 10131035) and 500  $\mu\text{g/ml}$  of hygromycin B (Sigma, H0654). Selection began 24hrs from the start of transduction and continued for another 7 days. Once selection was finished, cells were maintained on DR4 MEFs in media containing 100  $\mu\text{g/ml}$  of geneticin and 100  $\mu\text{g/ml}$  of hygromycin B. Expression of dCas9 was induced with 1  $\mu\text{g/ml}$  of doxycycline and cells were collected 72hrs later. Cells were crosslinked using formaldehyde in three biological replicates and the extent of YY1 binding at targeted and control untargeted enhancers in the same cells was evaluated after affinity purification of YY1-associated DNA followed by qPCR.

#### *Affinity purification and qPCR analysis (ChIP-qPCR) of YY1-associated DNA in the in vivo tethering experiments*

Approximately  $2 \times 10^7$  mESCs were chemically crosslinked by the addition of one-tenth volume of fresh 11% formaldehyde solution for 10 minutes at room temperature. Formaldehyde was quenched by addition of one-twentieth volume of 2.5M Glycine and incubation for another 5 min at room temperature. Cells were rinsed twice with 25 ml of ice-cold 1X PBS and harvested

using a silicon scraper, pelleted down by centrifugation at 1,500 g for 5 min at 4°C, and pellets were flash-frozen in liquid nitrogen. Cells were stored at –80°C prior to use.

Cells were lysed in 4 ml of LB1 (50mM HEPES-KOH pH 7.5, 140mM NaCl, 1mM EDTA, 0.25% Triton X-100, 0.5% NP-40, 10% glycerol) in presence of cOmplete proteinase inhibitors (Roche) and incubated on a rotator at 4°C for 10 min. After centrifugation at 1350 g for 5 min at 4°C, nuclei were washed with 4 ml of LB2 (10mM Tris-HCl pH 8.0, 200 mM NaCl, 1mM EDTA pH 8.0, 1mM EGTA pH 8.0 in presence of cOmplete proteinase inhibitors (Roche)) by incubating them on a rotator at 4°C for 10 min. After centrifugation at 1350 g for 5 min at 4°C, nuclei were resuspended in 2 ml of the final sonication buffer (50mM HEPES-KOH pH 7.5, 140mM NaCl, 1mM EDTA, 1% Triton X-100, 0.1% SDS, 0.1% sodium deoxycholate in presence of cOmplete proteinase inhibitors (Roche)) and sonicated on ice (7 cycles at 30 seconds each at 18 watts 60 second pause between pulses, output level 4.5) using Misonix Sonicator 3000. The resulting whole cell extract was cleared by centrifugation for 10 min at 20,000 g and then incubated overnight at 4°C with 50  $\mu$ l Dynabeads® MyOne™ Streptavidin T1 (Life Technologies, 65601) magnetic beads pre-blocked with 0.5% BSA in PBS for 2hrs at 4°C. Beads were washed at room temperature for 8 min with each of the following buffers: 2X with 2% (vol/vol) SDS in PBS; 1X with 50mM HEPES pH 7.5, 350mM NaCl, 1mM EDTA, 1% Triton X-100, 0.1% sodium deoxycholate, 0.1% SDS; 1X with 20mM Tris-HCl pH 8.0, 250 mM LiCl, 1mM EDTA, 0.5% NP40, 0.5% sodium deoxycholate; 2X with TE.

DNA was eluted off beads in 300  $\mu$ l of elution buffer (50 mM Tris-HCl pH 8.0, 10 mM EDTA pH 8.0, 1% SDS) by rotating the tubes containing the beads overnight at 65°C. SDS in the eluted sample was diluted two-fold with TE buffer, and RNA was digested by incubating the tubes at 37°C for 30 min in presence of 3  $\mu$ l of RNase A (30mg/ml). Following incubation, proteins were digested with 7  $\mu$ l of 20 mg/ml Proteinase K in presence of 3  $\mu$ l of 1M CaCl<sub>2</sub> at 55°C for 1.5hrs. After phenol/chloroform extraction, DNA was ethanol precipitated and resuspended in 50  $\mu$ l. DNA isolated from 5% of the initial whole-cell extract (input DNA) was similarly resuspended in 50  $\mu$ l of H<sub>2</sub>O.

1 $\mu$ l of the affinity-purified YY1-associated DNA or input DNA was used in qPCR reactions containing 1x *Power* SYBR Green PCR master mix (Life Technologies). *Arid1a* enhancer, bound by YY1 in mESCs, was chosen as a positive control region, whereas olfactory receptor gene, which has no YY1 binding in mESCs, was chosen as a negative control region. First, fold enrichment in YY1 binding at *Arid1a* enhancer in each ChIP sample over the YY1 binding at the same enhancer in the corresponding input sample was estimated relative to the fold enrichment at the negative control region in the same sample as a measure of the affinity purification efficiency in different samples. As a result, to compensate for differences in affinity purification efficiency among different samples, normalization coefficients were derived for each ChIP sample. Then, fold enrichment in YY1 binding at each of the six targeted enhancers and at three not targeted enhancers in each ChIP sample over the corresponding input sample was estimated relative to the fold enrichment at the negative control region in the same sample. These fold enrichment values were then multiplied by the normalization coefficients to allow comparison between different samples. Finally, fold enrichment at the targeted enhancers in cells containing tethered RNA was compared to fold enrichment at these enhancers in cells containing only the corresponding guide RNA (sgRNA). The differences in the fold enrichments were expressed as fold change in YY1 binding in cells containing tethered RNA relative to cells containing only the corresponding guide RNA.

Primer sequences were the following:

#### ***Arid1a* enhancer**

Forward      GGCAAACCTTTCGGTTCAGTGG  
Reverse      TTTTCCTCCCCCAAGACAGG

#### **Negative control region**

Forward      CCCACCTTGTGTTCAAATGCTGA  
Reverse      ACGCTTTTCTTCTGCCTTCTGC

#### ***Cnot6* enhancer**

Forward AACCATCAGGAAGGCATCAGG  
Reverse AGCTGATAGGCACTCTGGGTA

***Suz12* enhancer**

Forward GATCTCCGTACAAGCAGGAGG  
Reverse ACTCACCTAAATCTGCCTGCC

***E2f3* enhancer**

Forward AGATGCCAGAGGTCACCTTTG  
Reverse CAAGAGGATTTGTGGGGCTCT

***Nufip2* enhancer**

Forward TACACGTGTGCGCCAGAAGAG  
Reverse TCTAGGAGCCCAGCCCCTTTT

***Klf5* enhancer**

Forward CTCCATTGTCCTAGGGATGCC  
Reverse ACTTTATTCACGGGGCTCCAG

***Pias1* enhancer**

Forward ACTGACTTCCTCCAAGGCCAC  
Reverse TGAATGCTTGGTCCCCAGTGT

*p*-values for the *in vivo* tethering experiments are shown below:

|                                    | Fold change in YY1 binding relative to control |      |      | <i>p</i> -value for changes relative to control |
|------------------------------------|------------------------------------------------|------|------|-------------------------------------------------|
|                                    | exp1                                           | exp2 | exp3 |                                                 |
| Targeted enhancer <i>Suz12</i>     | 1.64                                           | 1.36 | 1.54 | 0.01                                            |
| not targeted enhancer <i>Cnot6</i> | 0.75                                           | 0.85 | 0.91 | 0.96                                            |
| not targeted enhancer <i>E2f3</i>  | 1.19                                           | 1.03 | 1.16 | 0.06                                            |
| not targeted enhancer <i>Klf5</i>  | 1.22                                           | 0.80 | 1.13 | 0.37                                            |
| Targeted enhancer <i>Cnot6</i>     | 1.14                                           | 1.34 | 1.32 | 0.03                                            |
| not targeted enhancer <i>Suz12</i> | 0.87                                           | 0.82 | 1.18 | 0.63                                            |
| not targeted enhancer <i>E2f3</i>  | 0.81                                           | 0.72 | 0.91 | 0.96                                            |
| not targeted enhancer <i>Klf5</i>  | 1.06                                           | 1.12 | 0.89 | 0.38                                            |

|                                    |      |      |      |      |
|------------------------------------|------|------|------|------|
| Targeted enhancer <i>E2f3</i>      | 1.5  | 1.58 | 1.43 | 0.00 |
| not targeted enhancer <i>Cnot6</i> | 1.30 | 1.22 | 1.31 | 0.01 |
| not targeted enhancer <i>Suz12</i> | 1.08 | 1.15 | 1.29 | 0.05 |
| not targeted enhancer <i>Klf5</i>  | 0.74 | 1.01 | 0.75 | 0.90 |
| Targeted enhancer <i>Klf5</i>      | 1.64 | 1.81 | 2.41 | 0.03 |
| not targeted enhancer <i>Suz12</i> | 0.96 | 0.69 | 0.87 | 0.91 |
| not targeted enhancer <i>E2f3</i>  | 1.02 | 0.68 | 1.10 | 0.67 |
| not targeted enhancer <i>Cnot6</i> | 0.89 | 0.86 | 0.83 | 0.99 |
| Targeted enhancer <i>Pias1</i>     | 1.51 | 1.39 | 1.31 | 0.01 |
| not targeted enhancer <i>Suz12</i> | 0.79 | 1.09 | 1.05 | 0.59 |
| not targeted enhancer <i>E2f3</i>  | 1.10 | 1.12 | 0.82 | 0.45 |
| not targeted enhancer <i>Cnot6</i> | 1.19 | 0.98 | 1.15 | 0.12 |
| Targeted enhancer <i>Nufip2</i>    | 1.87 | 2.18 | 1.42 | 0.03 |
| not targeted enhancer <i>Suz12</i> | 0.85 | 0.97 | 1.19 | 0.49 |
| not targeted enhancer <i>E2f3</i>  | 1.05 | 1.07 | 1.02 | 0.04 |
| not targeted enhancer <i>Cnot6</i> | 0.82 | 0.92 | 0.76 | 0.96 |

## **SUPPLEMENTARY FIGURES**

**Fig. S1:** YY1 binds to DNA and RNA at promoter-proximal and distal elements in murine embryonic stem cells (ESCs).

**Fig. S2:** OCT4 and YY1 are associated with promoters of active genes.

**Fig. S3:** YY1 CLIP-seq sample preparation and analysis.

**Fig. S4:** YY1 ChIP-seq and YY1 CLIP-seq reads are distributed similarly among various genomic regions.

**Fig. S5:** OCT4 does not bind to RNA *in vivo* or *in vitro*.

**Fig. S6:** YY1 binds to DNA probes containing consensus YY1 binding motif *in vitro* in murine ESC nuclear extracts.

**Fig. S7:** DNA-binding properties of recombinant YY1 are similar to properties of endogenous YY1 present in murine ESC nuclear extracts.

**Fig. S8:** YY1 binds to some RNA species *in vitro*.

**Fig. S9:** Different regions in YY1 are responsible for binding to DNA and RNA.

**Fig. S10:** Perturbation of RNA levels using transcription inhibitors affects YY1 binding to DNA.

**Fig. S11:** Treatment of ESCs with DRB does not change steady-state levels of YY1.

**Fig. S12:** RNA-seq and Western blot analyses of ESCs, in which an exosome component was targeted with shRNA.

**Fig. S13.** RNA sequences compatible with YY1 binding *in vitro* enhance YY1 binding *in vivo* when tethered near an YY1 binding site in DNA.

**Fig. S14.** Analysis of YY1 binding to probes utilized in the competition EMSA.

**Fig. S15.** DNA containing tethered RNA outcompetes DNA with untethered RNA in competition EMSA.

**Fig. S16.** EMSA of various transcription factors in complexes with RNA.

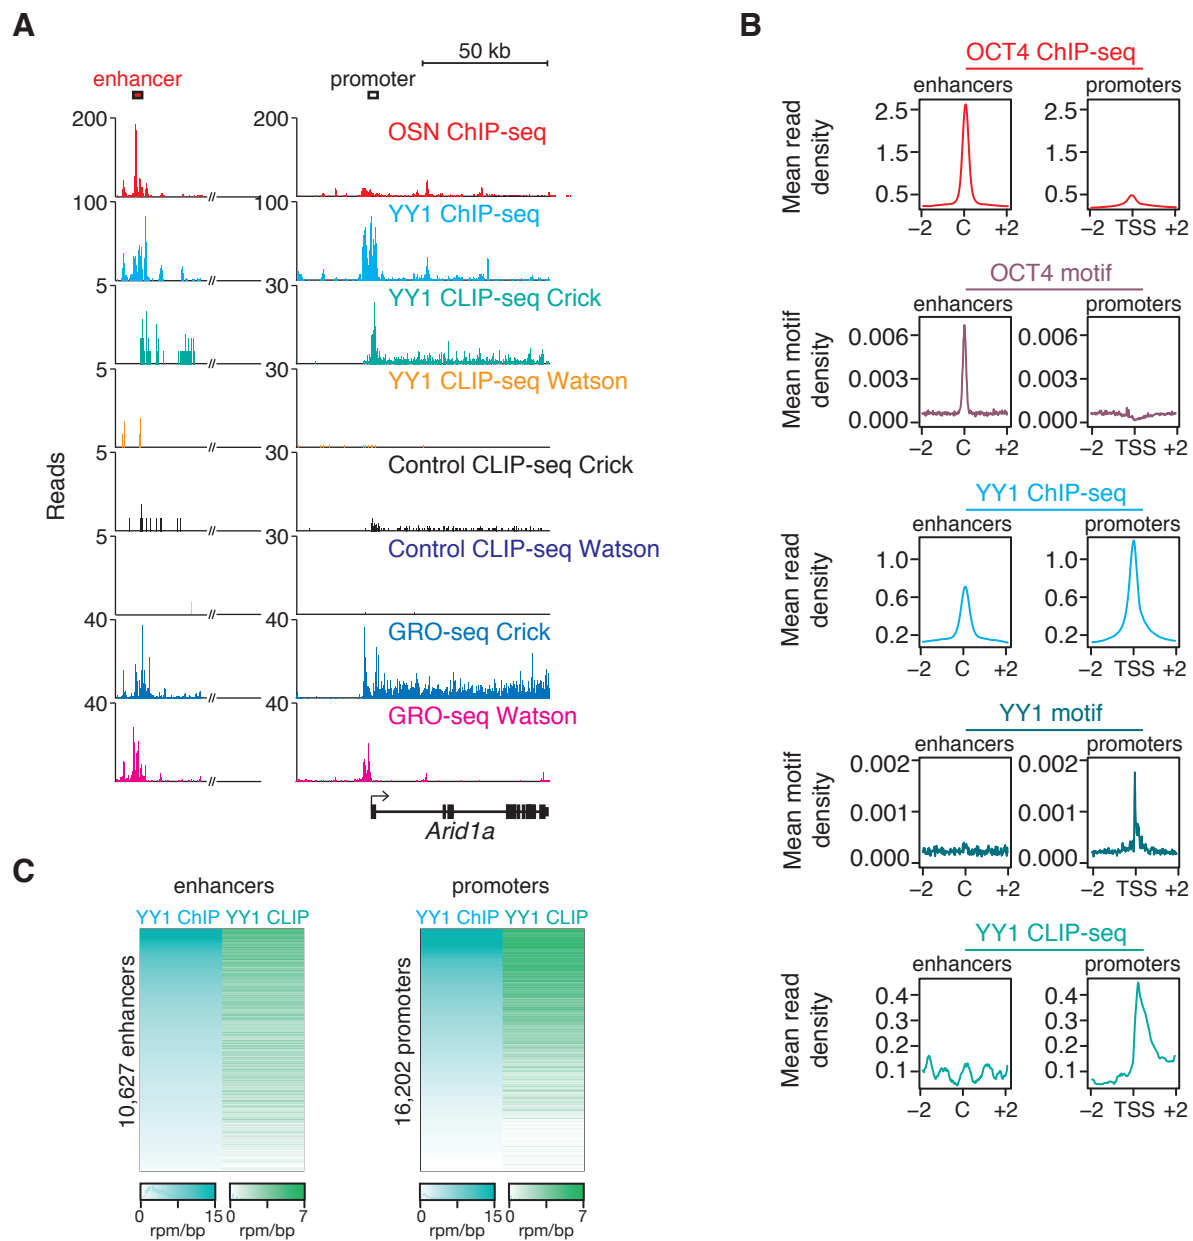

**Fig. S1. YY1 binds to DNA and RNA at promoter-proximal and distal elements in murine embryonic stem cells (ESCs).**

(A). Gene tracks for the *Arid1a* gene showing ChIP-seq reads for OCT4, SOX2, and NANOG (OSN) and bio-YY1, together with CLIP-seq data for bio-YY1 cells and control ESCs expressing only biotin ligase *BirA*. Bio-YY1 and control ESCs were previously described (25). Also shown are GRO-seq reads at the *Arid1a* gene and its enhancer. CLIP-seq and GRO-seq reads that map to Watson and Crick strands of DNA are shown separately. Portions of this panel are duplicated from Fig.1C for context.

(B). Mean read density of OCT4 ChIP-seq, YY1 ChIP-seq, and YY1 CLIP-seq reads as well as alignment of Oct4 and YY1 motif occurrences at enhancers and promoters of all RefSeq genes in ESCs. The x-axis indicates distance from either the enhancer center (C) or the transcription start site (TSS) in kilobases. The y-axis indicates mean density of uniquely mapped reads or average count of motifs per genomic bin. Portions of this panel are duplicated from Fig.1D for context.

(C). Heatmap comparing YY1 binding to DNA and RNA at enhancers and promoters of all RefSeq genes in ESCs using ChIP-seq and CLIP-seq data. Enhancers and promoters were ranked based on number of YY1 ChIP-seq reads.

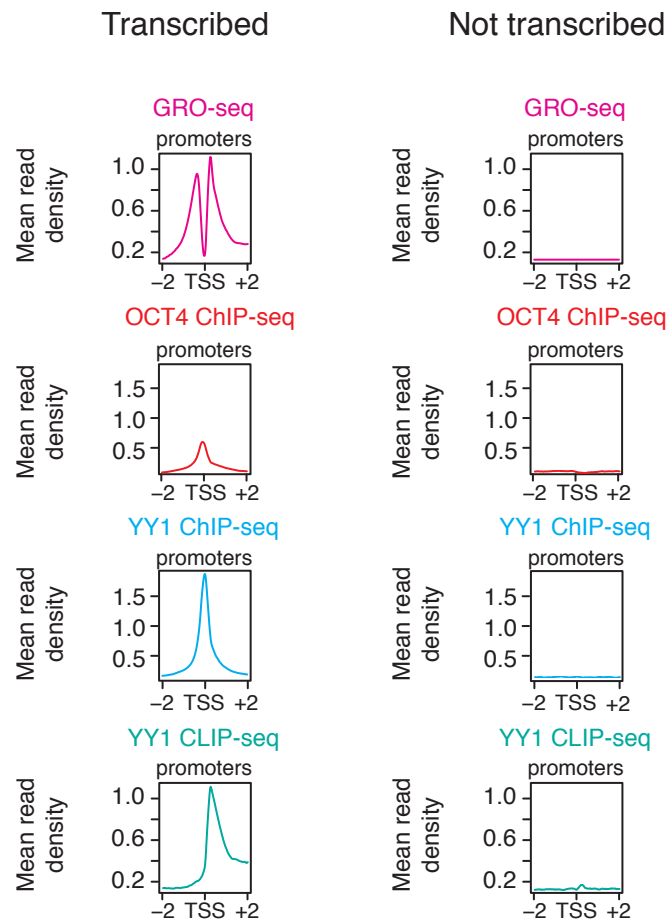

**Fig. S2. OCT4 and YY1 are associated with promoters of active genes.**

Alignment of GRO-seq, OCT4 ChIP-seq, YY1 ChIP-seq, and YY1 CLIP-seq at promoters of transcribed RefSeq genes and at promoters of genes that are not transcribed in murine ESCs. The x-axis indicates distance from the TSS in kilobases. The y-axis indicates average density of uniquely mapped reads per genomic bin. Transcribed promoters have more than one GRO-seq read assigned per kilobase of target per million mapped reads (RPKM), whereas not transcribed ones have no GRO-seq and no histone 3 trimethylated at lysine 4 (H3K4me3) ChIP-seq reads.



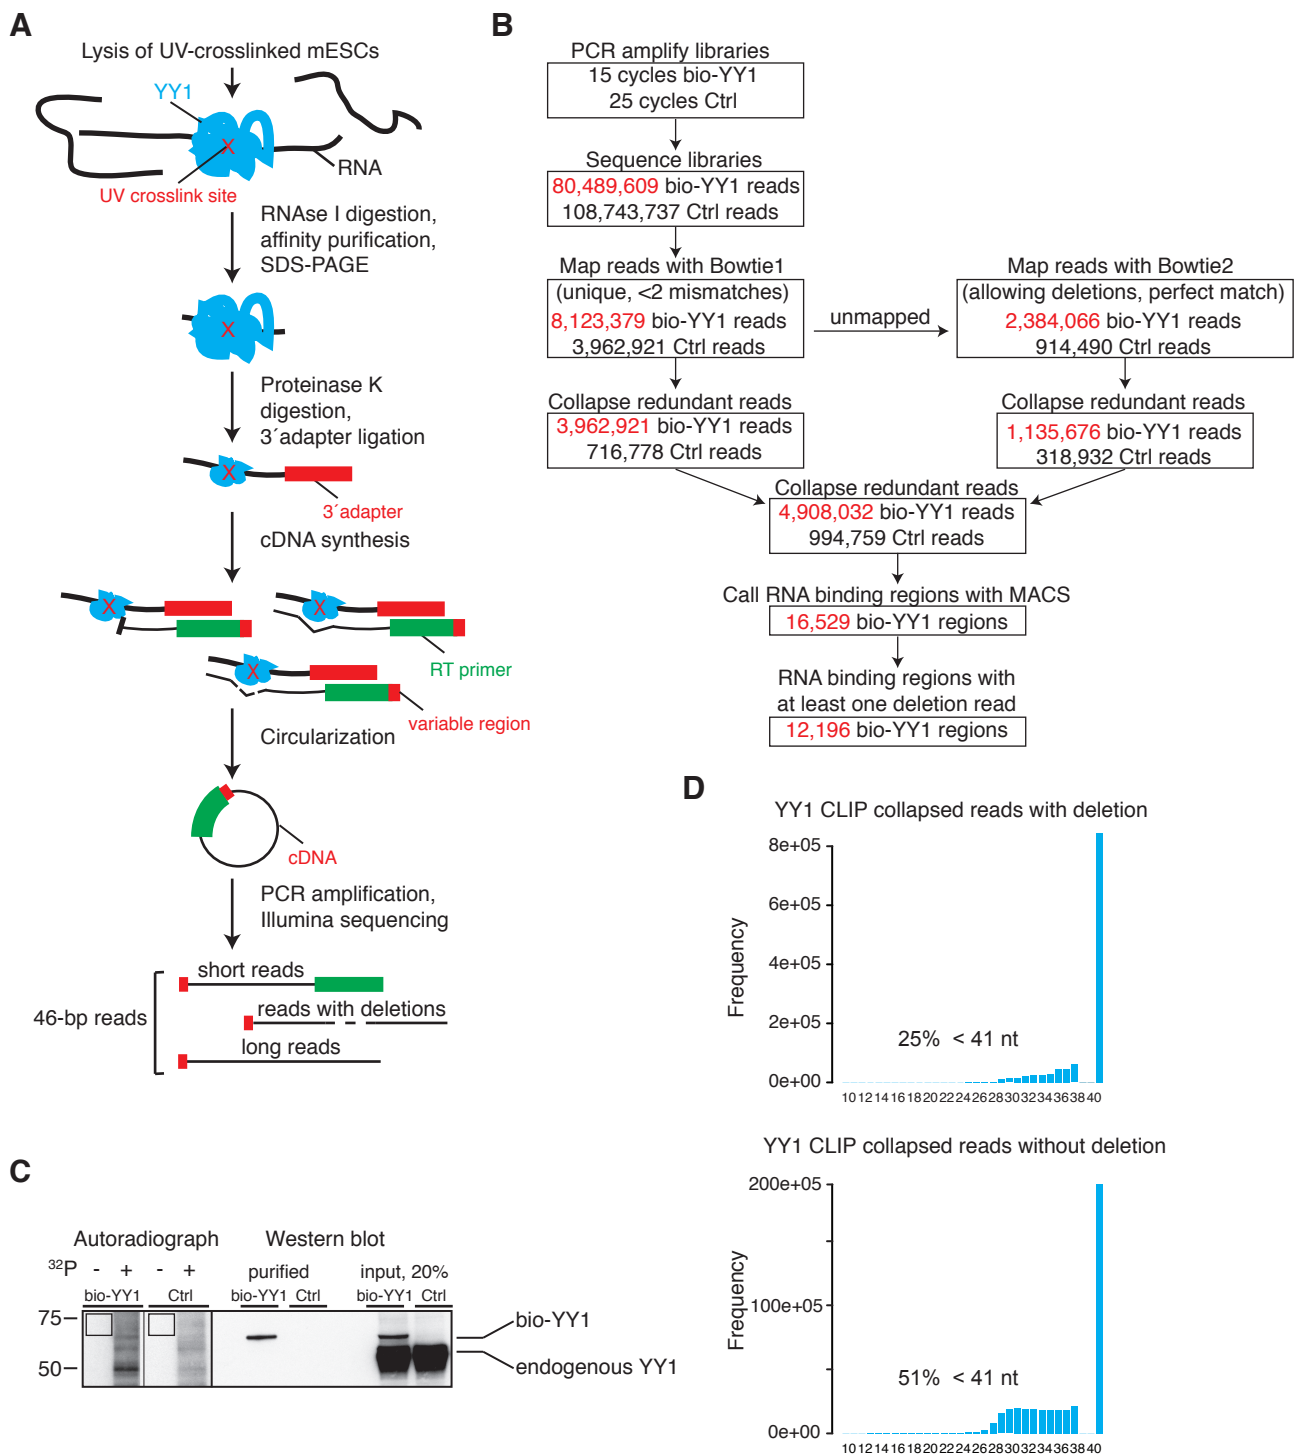

**Fig. S3. YY1 CLIP-seq sample preparation and analysis.**

(A). Schematic of CLIP-seq protocol used for identification of RNA species bound by YY1 *in vivo*.

(B). Flowchart of pipeline for identification of RNA regions associated with biotinylated-YY1 (bio-YY1). Each step of the analysis pipeline is indicated above rectangular boxes. Number of reads or regions at each step of the analysis pipeline is shown in red for bio-YY1 and in black for control (Ctrl) *BirA* mESCs.

(C). Western blot analysis of bio-YY1 purified during the CLIP procedure is shown alongside the autoradiograph of the nitrocellulose membrane obtained after transfer of RNA species UV-crosslinked to the affinity purified bio-YY1 protein from SDS-PAGE to the membrane. Control (Ctrl) CLIP procedure was conducted using cells containing only *BirA* biotin ligase and no bio-YY1. Rectangular boxes indicate regions of the membrane, which were excised to isolate the RNA.

(D). Distribution of lengths of YY1 CLIP-seq reads either containing or lacking deletions demonstrates that deletion reads are longer than reads without deletions consistent with both types of reads being derived from UV-crosslinked RNA species.

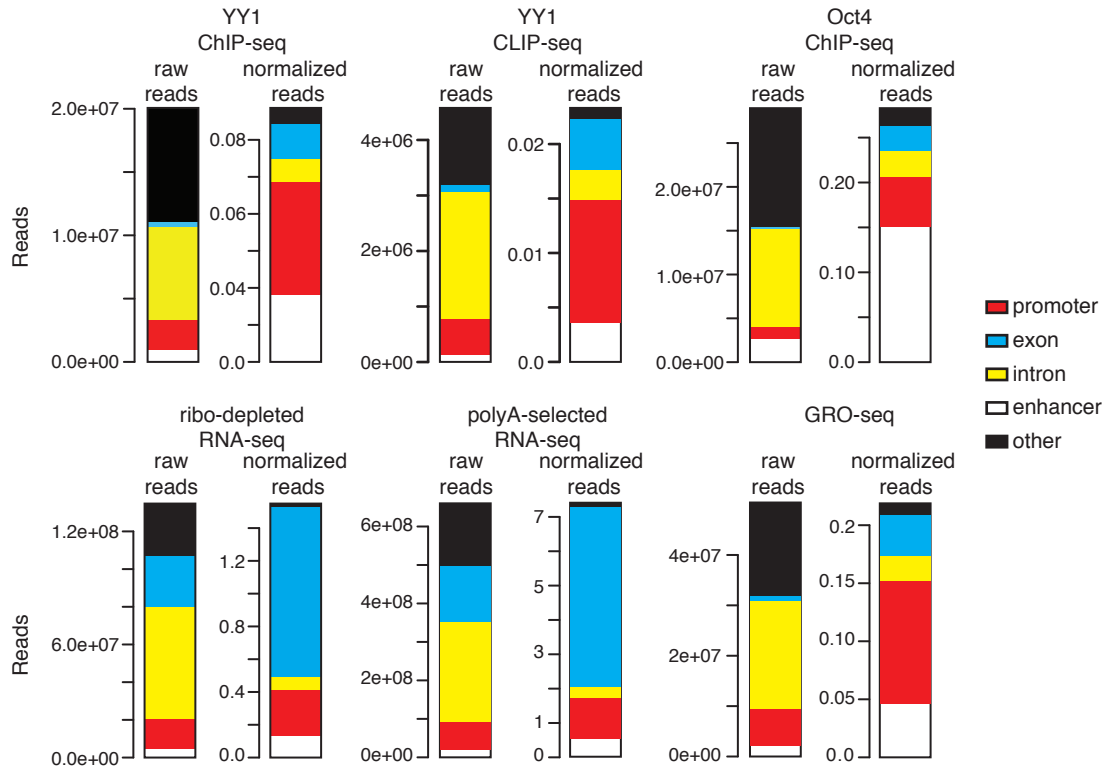

**Fig. S4. YY1 ChIP-seq and YY1 CLIP-seq reads are distributed similarly among various genomic regions.**

Stacked bar-plots comparing distributions of YY1 ChIP-seq and YY1 CLIP-seq reads among promoters, enhancers, exons, introns, and all other genomic locations. Distributions of Oct4 ChIP-seq reads, ribo-depleted RNA-seq reads, polyA-selected RNA-seq reads, and GRO-seq reads are shown as controls. Data are presented as either raw reads or reads normalized to the size of these regions in genomic DNA.

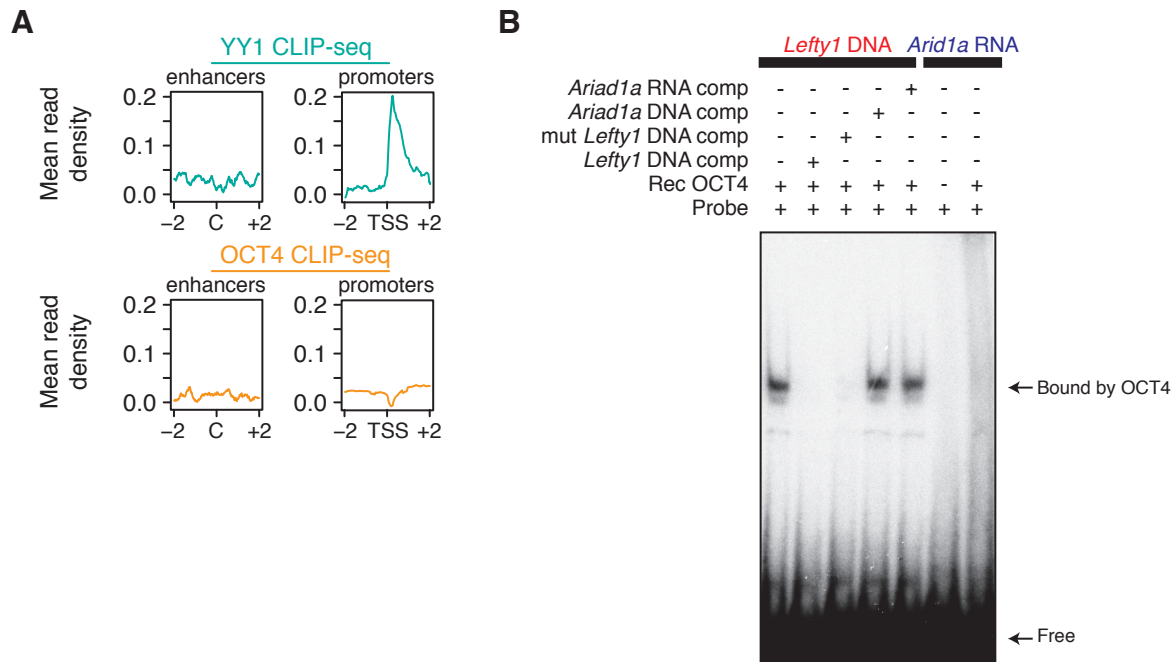

**Fig. S5. OCT4 does not bind to RNA *in vivo* or *in vitro*.**

(A). Comparison of YY1 CLIP-seq and OCT4 CLIP-seq reads at enhancers and promoters of all RefSeq genes. Background CLIP read densities obtained by sequencing of RNA isolated from control ESCs expressing only *BirA* biotin ligase were subtracted from CLIP read densities obtained by sequencing of RNA isolated from ESCs expressing biotinylated versions of YY1 (bio-YY1) or OCT4 (bio-OCT4). The x-axis indicates distance from the TSS in kilobases. The y-axis indicates average density of uniquely mapped reads per genomic bin.

(B). EMSA analysis of DNA in complex with recombinant human OCT4 protein (Rec OCT4) in the presence and absence of competitor DNA. A radioactively labeled 40-bp DNA probe containing OCT4 consensus binding motif derived from the enhancer of *Lefty1* gene was incubated with 250 nM of the recombinant human OCT4 (Abcam, #ab134876). In competition EMSA, 100-fold molar excess of cold competitor DNA containing the OCT4 motif (*Lefty1* DNA comp), cold DNA competitor, in which bases adjacent the OCT4 motif were randomly substituted (mut *Lefty1* DNA comp), cold DNA competitor lacking the OCT4 motif (*Arid1a* DNA comp), or cold RNA competitor (*Arid1a* RNA comp) was pre-incubated with the recombinant OCT4 before the radioactively labeled DNA probe was added to the binding reaction. The arrows indicate free probe and probe bound by OCT4. Incubation of a 30-nt RNA probe derived from the promoter region of *Arid1a* gene with 250 nM of the recombinant human OCT4 did not retard the probe.

**A**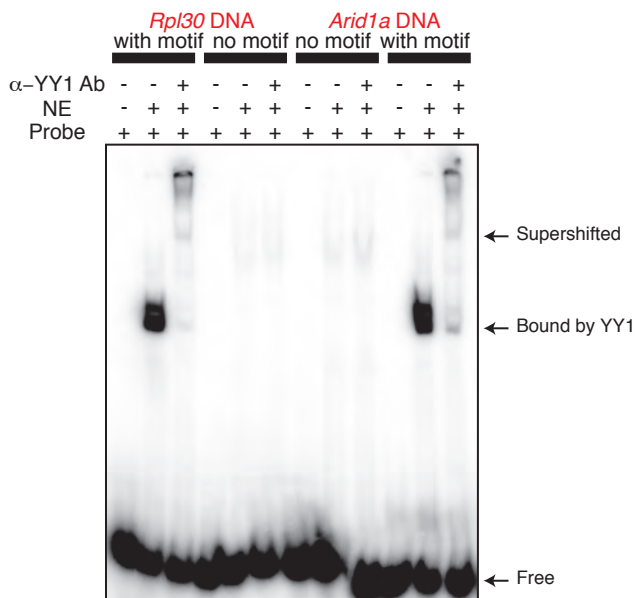**B**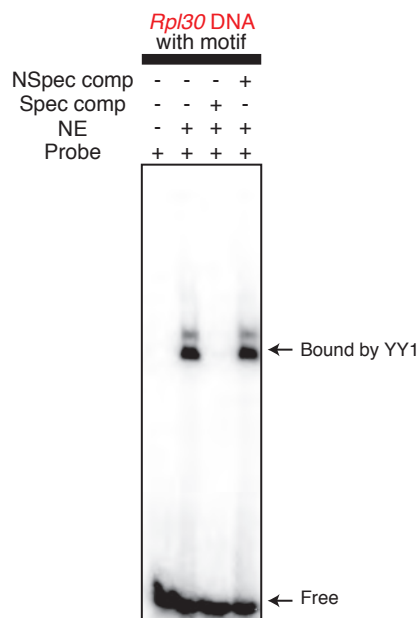

**Fig. S6. YY1 binds to DNA probes containing consensus YY1 binding motif *in vitro* in murine ESC nuclear extracts.**

(A). EMSA of YY1-DNA complexes. 10  $\mu$ l of ESC nuclear extract (NE) was incubated with 30-bp radioactively labeled DNA probes. For supershift assay, 0.5  $\mu$ l of YY1 antibodies (#sc-7341) was added to the DNA probe pre-incubated with NE. Identity of the DNA probes is shown above the image. The arrows indicate free probe, probe bound by YY1, and supershifted probe.

(B). EMSA analysis of YY1-DNA complexes in the presence and absence of competitor DNA. Radioactively labeled 30-bp DNA probe containing YY1 consensus binding motif derived from the promoter region of *Rpl30* gene was incubated with 10  $\mu$ l of ESC nuclear extract (NE). In competition EMSA, 100-fold molar excess of cold competitor DNA containing YY1 motif (Spec comp) or lacking YY1 motif (Nspec comp) was pre-incubated with NE before the radioactively labeled DNA probe was added to the binding reaction. The arrows indicate free probe and probe bound by YY1.

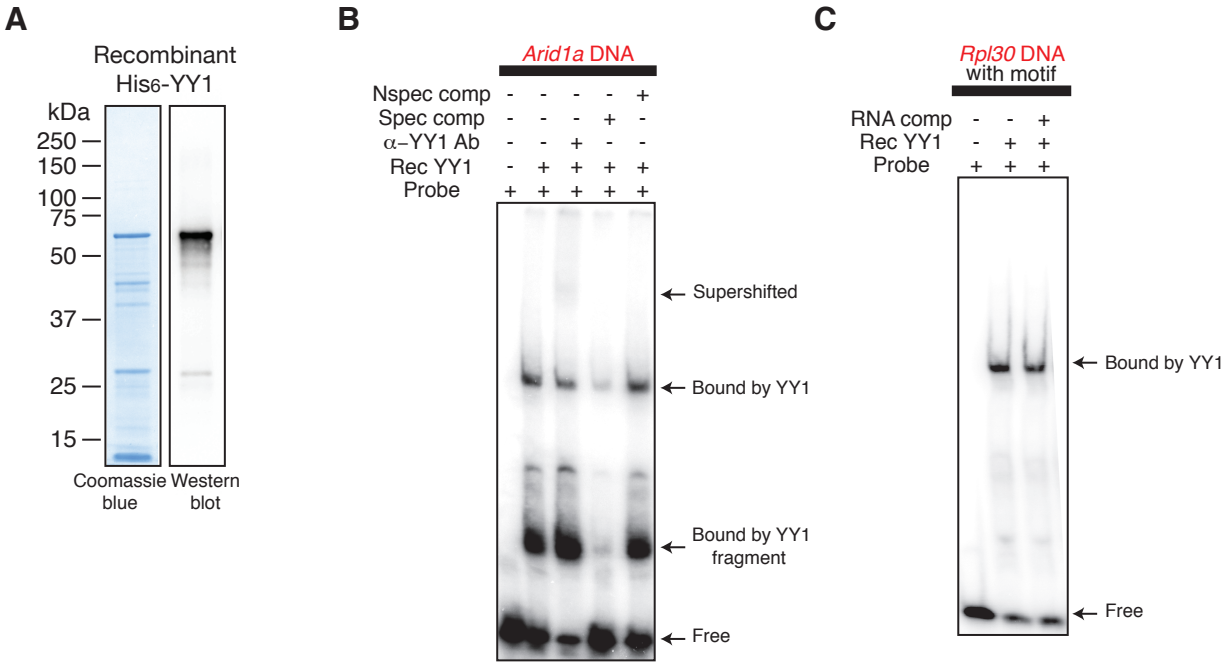

**Fig. S7. DNA-binding properties of recombinant YY1 are similar to properties of endogenous YY1 present in murine ESC nuclear extracts.**

(A). Coomassie Blue staining and Western blot analysis of recombinant YY1 used for *in vitro* studies.

(B). EMSA analysis of DNA in complex with recombinant YY1 protein (Rec YY1) in presence and absence of competitor DNA. A radioactively labeled 30-bp DNA probe containing YY1 consensus binding motif derived from the promoter region of *Arid1a* gene was incubated with 80 nM of the recombinant YY1. For supershift assay, 0.5  $\mu$ l of YY1 antibodies (#sc-7341) was added to the DNA probe pre-incubated with the recombinant protein. In competition EMSA, 100-fold molar excess of cold competitor DNA containing YY1 motif (Spec comp) or lacking YY1 motif (Nspec comp) was pre-incubated with the recombinant YY1 before the radioactively labeled DNA probe was added to the binding reaction. The arrows indicate free probe, probe bound by YY1, probe bound by YY1 fragment, and supershifted probe.

(C). EMSA analysis of YY1-DNA complexes in the presence and absence of competitor RNA. Radioactively labeled 30-bp DNA probe containing YY1 consensus binding motif derived from the promoter region of *Rpl30* gene was incubated with 240 nM of the recombinant YY1. In competition EMSA, 100-fold molar excess of cold competitor RNA derived from the promoter region of *Arid1a* gene was pre-incubated with the recombinant YY1 before the radioactively labeled DNA probe was added to the binding reaction. The arrows indicate free probe and probe bound by YY1.

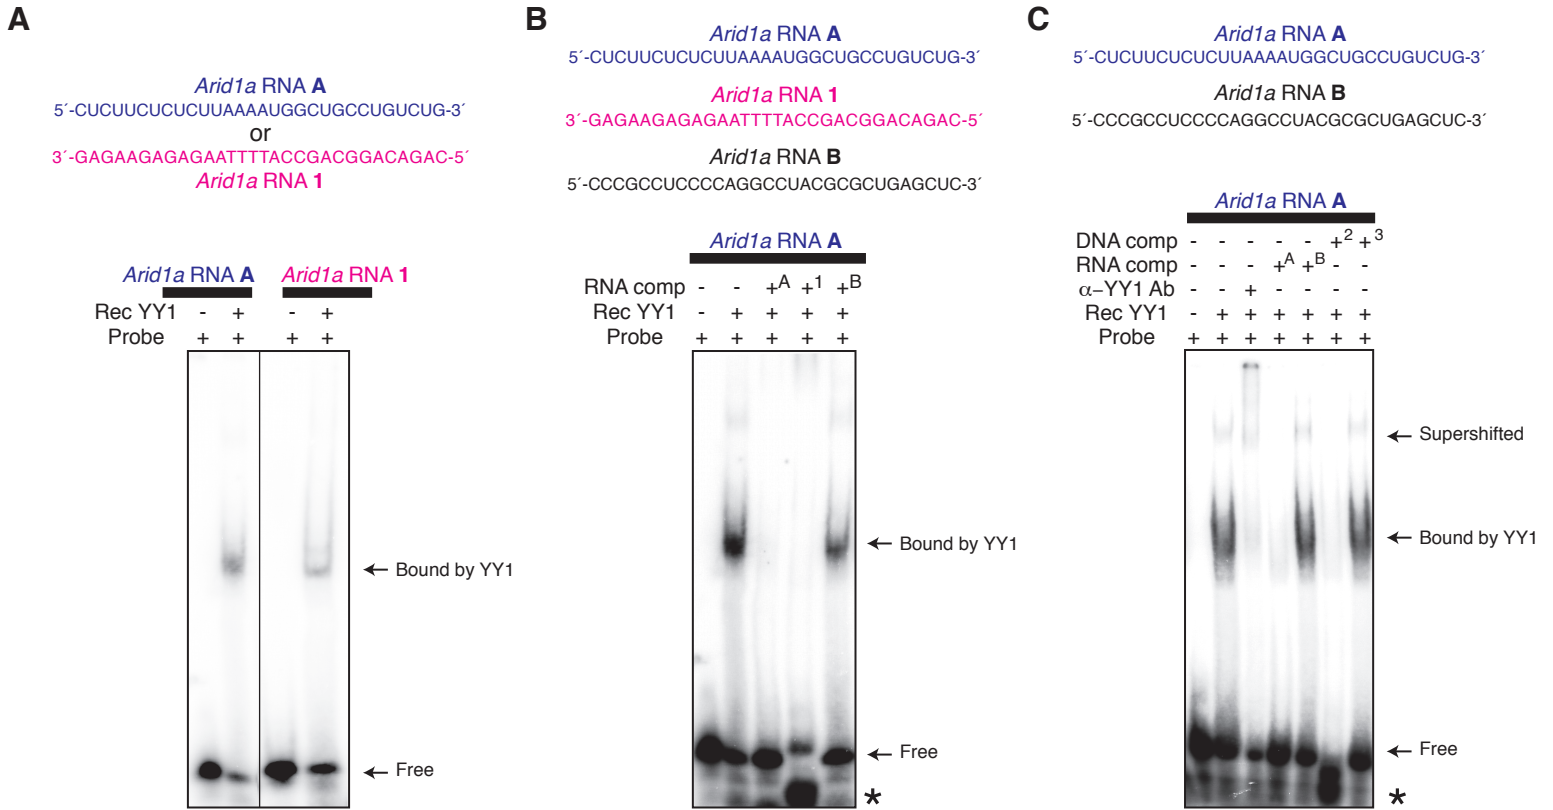

**Fig. S8. YY1 binds to some RNA species *in vitro*.**

(A). EMSA analysis of RNA in complex with recombinant YY1 protein (Rec YY1). A radioactively labeled 30-nt RNA probe containing sequence derived from the promoter region of *Arid1a* gene (shown in blue above the image) or the complementary sequence (shown in pink) was incubated with 400 nM of the recombinant YY1. The arrows indicate free probe and probe bound by YY1.

(B). EMSA analysis of YY1-RNA complexes in presence and absence of competitor RNA. Radioactively labeled 30-nt RNA probe derived from the promoter region of *Arid1a* gene was incubated with 400 nM of recombinant YY1. Sequence of the probe is shown above the image in blue. In competition EMSA, 100-fold molar excess of cold competitor RNA with the same sequence as the radiolabeled RNA (*Arid1a* RNA A), complementary sequence (*Arid1a* RNA 1), or a different sequence (*Arid1a* RNA B) was pre-incubated with the recombinant YY1 before the probe was added to the binding reaction. The arrows indicate free probe and probe bound by YY1. Asterisk indicates the position of double-stranded RNA formed when single-stranded cold RNA was incubated with the complementary labelled RNA probe.

(C). EMSA analysis of YY1-RNA complexes in presence and absence of competitor RNA. Radioactively labeled 30-nt RNA probe derived from the promoter region of *Arid1a* gene was incubated with 400 nM of recombinant YY1. Sequence of the probe and competitor RNA are shown above the image. For supershift assay, 0.5  $\mu$ l of YY1 antibodies (#sc-7341) was added to the RNA probe. In competition EMSA, 100-fold molar excess of cold competitor RNA with the same sequence as the radiolabeled RNA probe (*Arid1a* RNA A) or a different sequence (*Arid1a* RNA B) was pre-incubated with the recombinant YY1 before the probe was added to the binding reaction. Other cold competitors were double-stranded DNA derived from the promoter region of *Arid1a* gene containing the YY1 motif and the same sequence as the radiolabeled RNA probe (competitor 2) and double-stranded DNA derived from the promoter region of *Rpl30* gene containing the YY1 motif (competitor 3). The arrows indicate free probe, probe bound by YY1, and supershifted probe. Asterisk indicates the position of DNA-RNA hybrid probe formed when remnants of unannealed single-stranded DNA present in the cold double-stranded *Arid1a* DNA competitor interacted with the complementary labelled RNA probe.

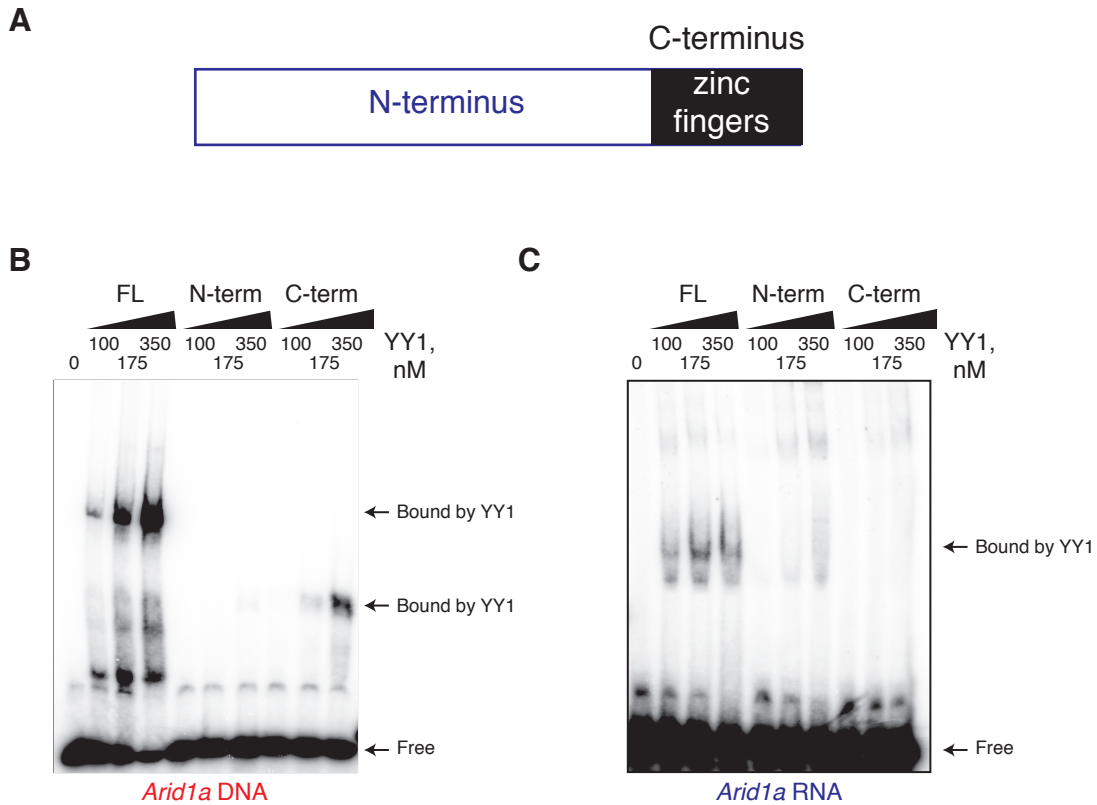

**Fig. S9. Different regions in YY1 are responsible for binding to DNA and RNA.**

**(A).** Cartoon depicting regions of YY1 used in EMSA. Sizes of N-terminal and C-terminal regions of YY1 are drawn to scale.

**(B).** EMSA of YY1-DNA complexes at different concentrations of recombinant YY1. 5 nM of radioactively labeled 30-bp DNA probe derived from the promoter region of *Arid1a* gene containing a consensus YY1 binding motif was incubated with increasing concentrations of full-length recombinant YY1 protein (FL), the N-terminal portion of YY1 (N-term) lacking the zinc-fingers or the C-terminal portion (C-term) containing the zinc fingers. Concentration of the YY1 protein in binding reactions is displayed above the image. The arrows indicate free probe and probe bound by YY1.

**(C).** EMSA of YY1-RNA complexes at different concentrations of recombinant YY1. 5 nM of radioactively labeled 30-nt RNA probe derived from the promoter region of *Arid1a* gene was incubated with increasing concentrations of full-length recombinant YY1 protein (FL), the N-terminal portion of YY1 (N-term) lacking the zinc-fingers or the C-terminal portion (C-term) containing the zinc fingers. Concentration of the YY1 protein in binding reactions are displayed above the image. The arrows indicate free probe and probe bound by YY1.

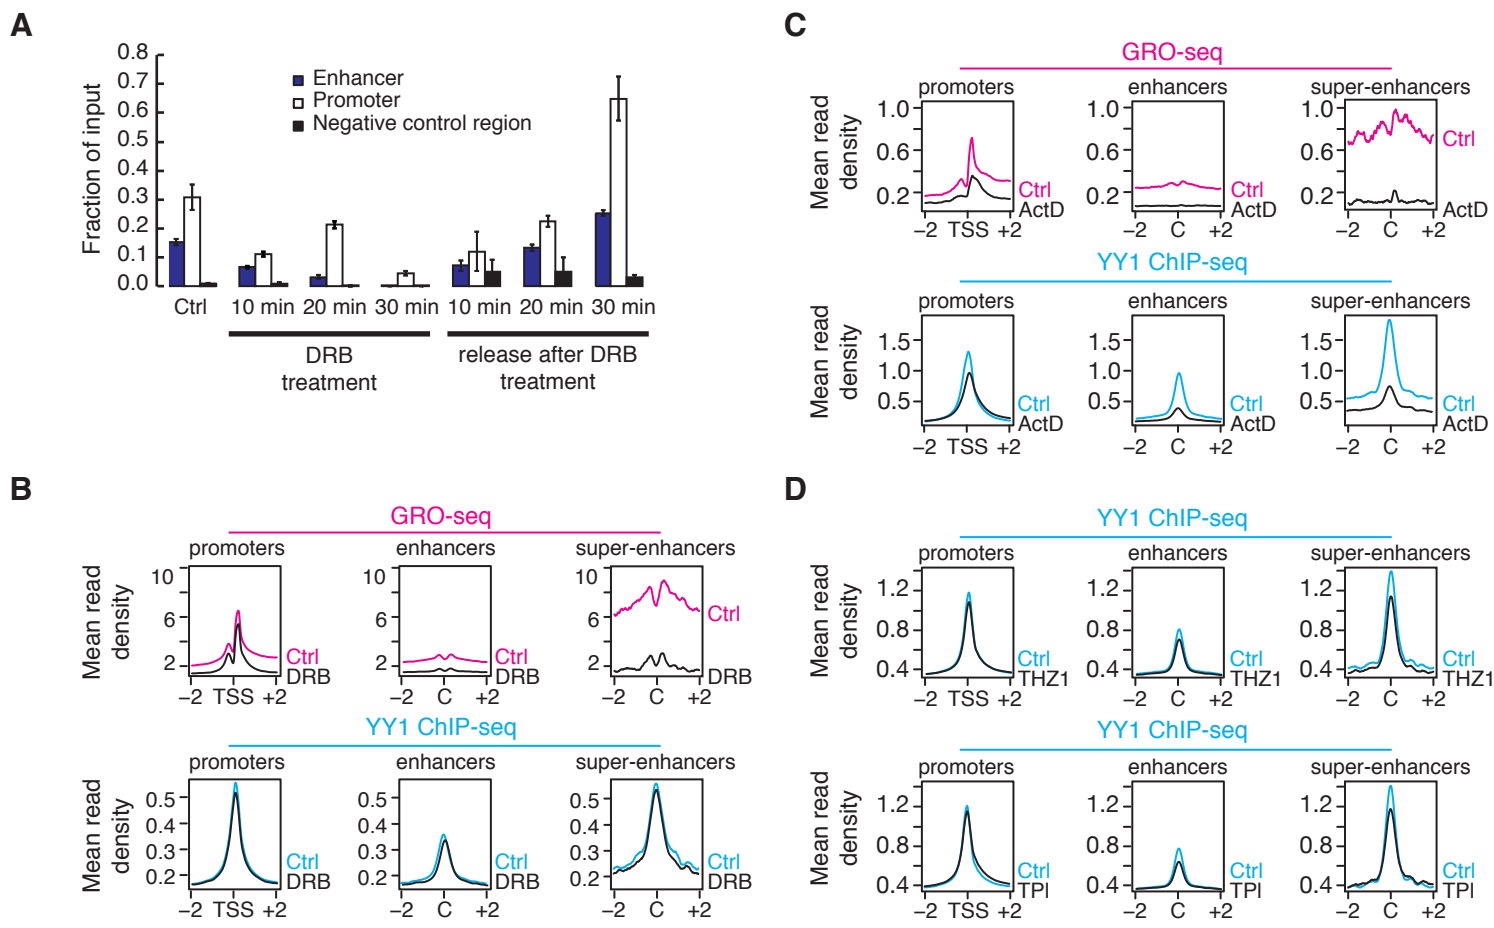

**Fig. S10. Perturbation of RNA levels using transcription inhibitors affects YY1 binding to DNA.**

(A). Results of YY1 ChIP followed by quantitative PCR (ChIP-qPCR) analysis at the *Arid1a* enhancer, promoter, and a negative control region in mESCs treated with D-rybofuranosylbenzimidazole (DRB) for various time intervals, and in ESCs at several time points after DRB was removed from the culture media (release after DRB treatment). The y-axis indicates YY1 binding at the specified genomic regions as a fraction of input.

(B). (Top) Alignment of GRO-seq reads at promoters of all RefSeq genes and at enhancers and super-enhancer constituents in control untreated ESCs and cells treated with DRB (24). (Bottom) Alignment of YY1 ChIP-seq reads at promoters of control untreated ESCs and in cells treated with DRB for 30 min. The x-axis indicates distance from either the TSS or from the enhancer or super-enhancer constituent center (C) in kilobases. The y-axis indicates average density of uniquely mapped GRO-seq or ChIP-seq reads per genomic bin. Decrease in YY1 binding in presence of DRB is significant:  $p$ -value  $< 3.8 \times 10^{-15}$  for promoters,  $p$ -value  $< 2.4 \times 10^{-22}$  for enhancers,  $p$ -value  $< 2.7 \times 10^{-3}$  for super-enhancer constituents.  $p$ -values were calculated using the one-tailed  $t$ -test.

(C). Alignment of GRO-seq and YY1 ChIP-seq reads at promoters of all RefSeq genes as well as at enhancers and super-enhancer constituents in control DMSO-treated ESCs and in cells treated with actinomycin D (ActD) for 6 hrs. The decrease in YY1 binding in the presence of ActD is significant:  $p$ -value  $< 4.5 \times 10^{-7}$  for promoters,  $p$ -value  $< 1.0 \times 10^{-1023}$  for enhancers,  $p$ -value  $< 3.8 \times 10^{-82}$  for super-enhancer constituents.

(D). Alignment of YY1 ChIP-seq reads at promoters of all RefSeq genes as well as at enhancers and super-enhancer constituents in control DMSO-treated ESCs and in cells treated with THZ1 or triptolide (TPI) for 6 hrs. Decrease in YY1 binding in presence of THZ1 is significant:  $p$ -value  $< 2.1 \times 10^{-6}$  for promoters,  $p$ -value  $< 2.5 \times 10^{-27}$  for enhancers,  $p$ -value  $< 1.5 \times 10^{-8}$  for super-enhancer constituents. Decrease in YY1 binding in presence of TPI is significant:  $p$ -value  $< 4.4 \times 10^{-18}$  for enhancers,  $p$ -value  $< 2.8 \times 10^{-1}$  for super-enhancer constituents.



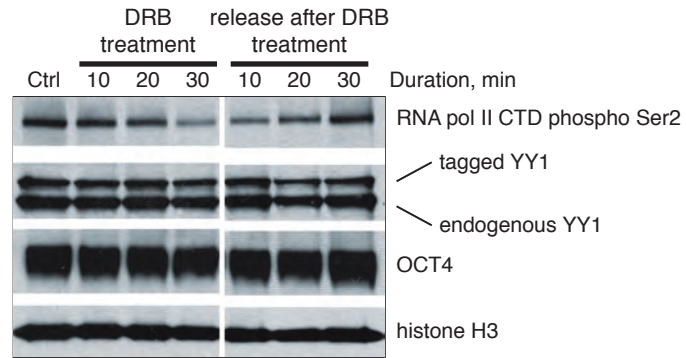

**Fig. S11. Treatment of ESCs with DRB does not change steady-state levels of YY1.**

Western blot analysis of protein levels of RNA polymerase II phosphorylated at serine 2 (RNA pol II CTD phospho Ser2), YY1, and OCT4 in control ESCs, in cells treated with DRB within intervals of time shown above the graph, and in ESCs at several time points once DRB was removed from the culture media (release of inhibition). Histone H3 and OCT4 serve as controls.

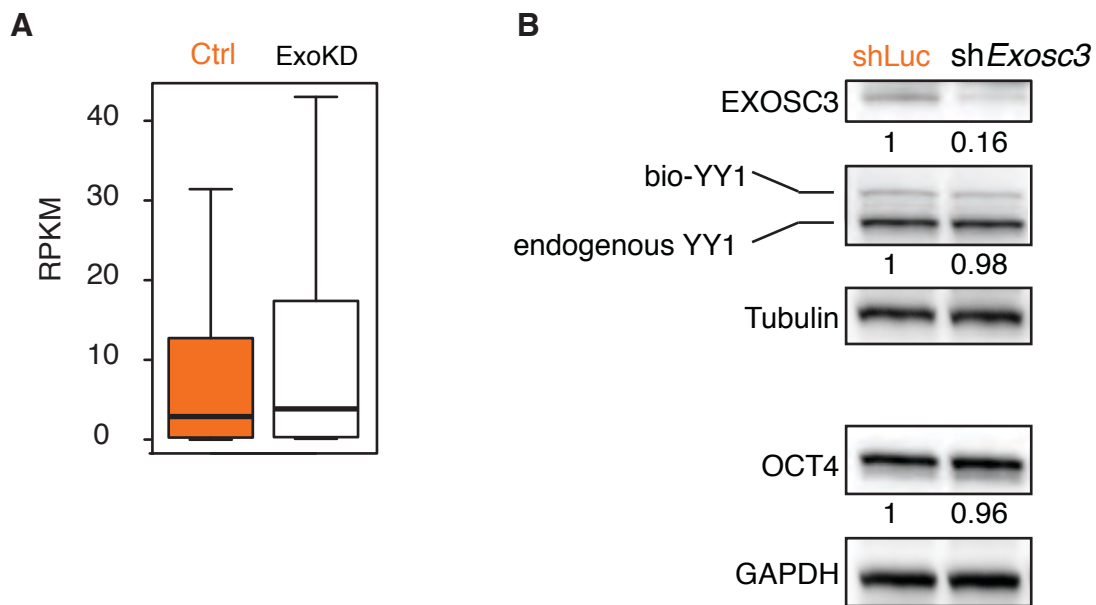

**Fig. S12. RNA-seq and Western blot analyses of ESCs, in which an exosome component was targeted with shRNA.**

(A). Box plot of changes in expression of all RefSeq transcripts in ESCs targeted with control shRNA against luciferase gene (Ctrl) or with shRNA against *Exosc3*. RPKM values for RefSeq transcripts and ERCC spike-in probes were calculated using RPKM\_count.py (RSeQC). These values were then floored at 0.01 and a pseudocount of 0.1 was added to all entries. Using normalize.loess from the affy R package, RPKM values for the RefSeq transcripts were subsequently normalized using all ERCC probes as the normalization subset, and the distributions were further log-normalized using log.it. RefSeq transcripts were significantly up-regulated in cells targeted with shRNA against *Exosc3* relative to control cells ( $p$ -value  $< 5.07 \times 10^{-25}$ ). The  $p$ -value was calculated using a one-tailed Wilcoxon rank sum test.

(B). Western blot analyses of protein levels of exosome component EXOSC3 as well as levels of YY1 and OCT4 in ESCs targeted with control shRNA against luciferase gene (Ctrl) or with shRNA against *Exosc3*. Levels of GAPDH and  $\beta$ -Tubulin serve as loading controls. Normalized values are shown below corresponding blots.

**A**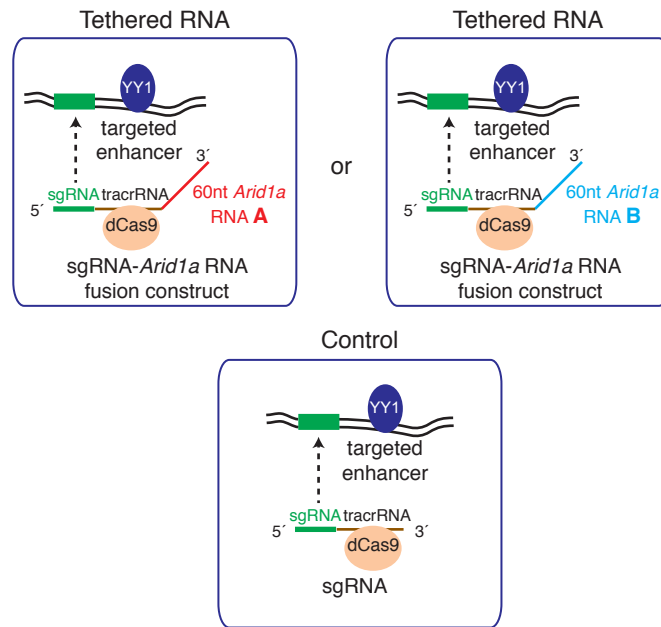**B**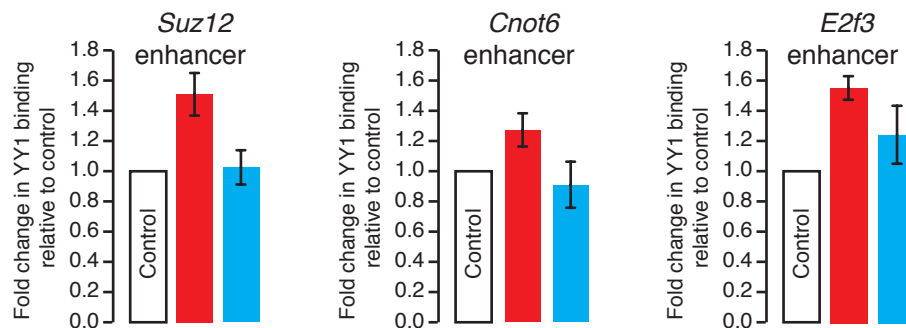

**Fig. S13. RNA sequences compatible with YY1 binding *in vitro* enhance YY1 binding *in vivo* when tethered near an YY1 binding site in DNA .**

(A). Cartoon depicting strategy for tethering of RNA in the vicinity of YY1 binding site at three different enhancers *in vivo*. Control ESCs were engineered to express catalytically inactive endonuclease Cas9 (dCas9) and guide RNAs (sgRNA) fused to tracrRNA, permitting targeting of dCas9 near an YY1 binding site at the three enhancers. Experimental ESC lines were engineered to express dCas9 with the same sgRNAs and tracrRNA fused to either a 60-nt RNA from the promoter region of *Arid1a* gene containing RNA sequence compatible with YY1 binding *in vitro* (RNA A shown in red) or RNA sequence not compatible with YY1 binding *in vitro* (RNA B shown in blue), permitting the *Arid1a* RNAs to be targeted near the three enhancers (tethered RNA). (B). ChIP-qPCR analysis of YY1 binding at three enhancers targeted with a 60-nt RNA from the promoter region of *Arid1a* gene containing RNA sequence compatible with YY1 binding *in vitro* (shown in red) and RNA sequence not compatible with YY1 binding *in vitro* (shown in blue) in control ESCs and in ESCs containing tethered RNAs in three independent experiments. The y-axis indicates fold change in YY1 binding in ESCs expressing the sgRNA-*Arid1a* RNA fusion construct relative to cells expressing the sgRNA targeted to the same locus. The difference in YY1 binding was significant for the enhancers targeted with RNA A: *Suz12* enhancer ( $p$ -value=0.01), *Cnot6* enhancer ( $p$ -value=0.03), and *E2f3* enhancer ( $p$ -value=0.01), but not with RNA B: *Suz12* enhancer ( $p$ -value=0.4), *Cnot6* enhancer ( $p$ -value=0.8), and *E2f3* enhancer ( $p$ -value=0.1).

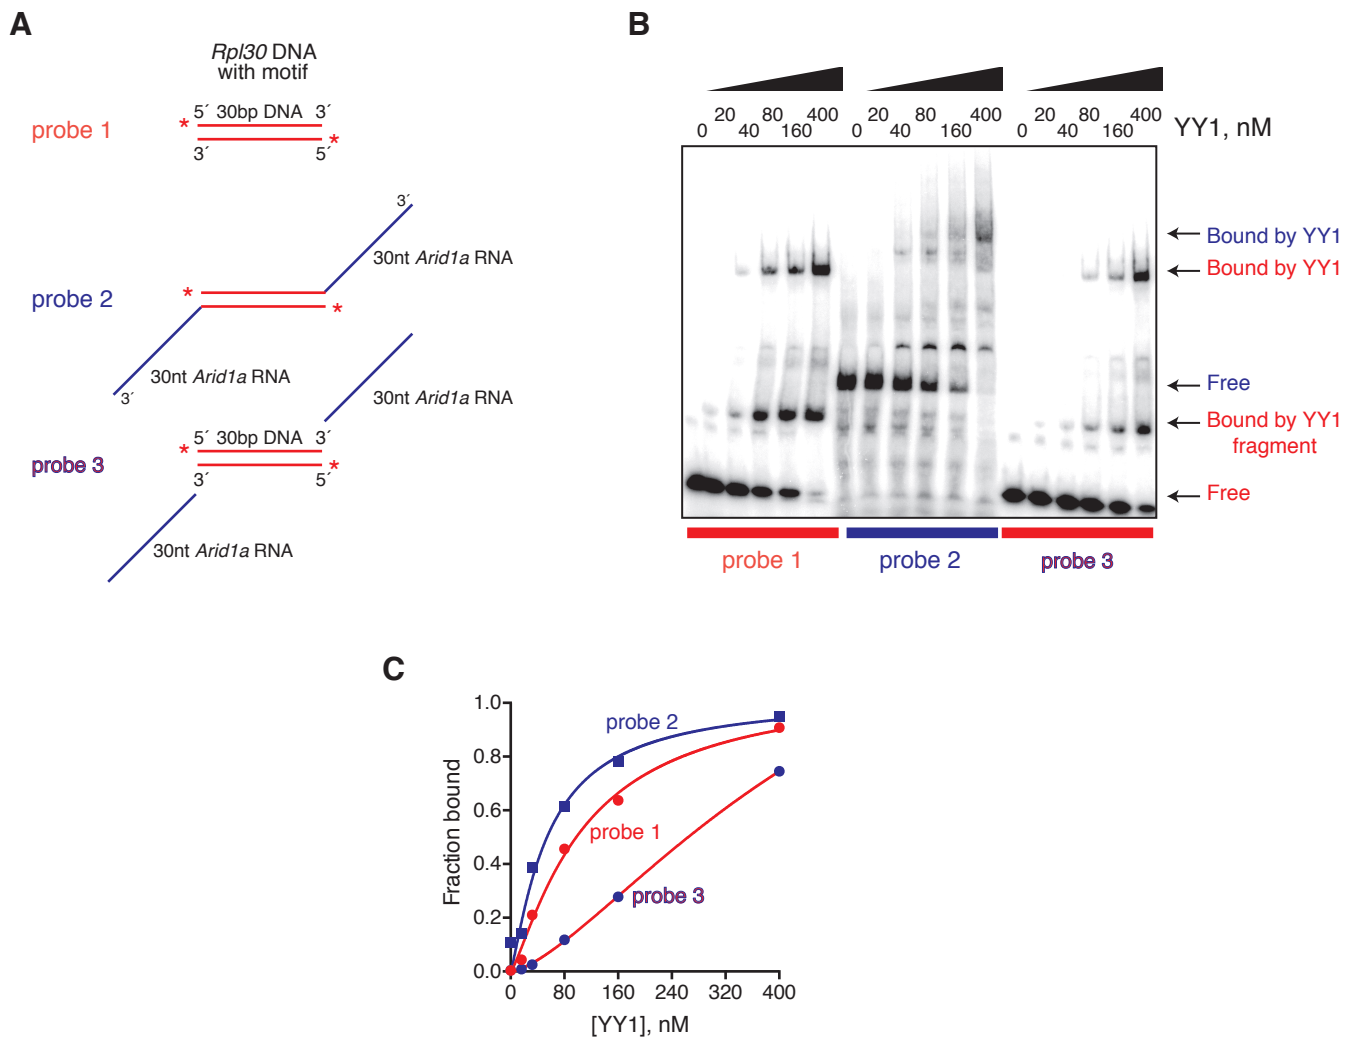

**Fig. S14. Analysis of YY1 binding to probes utilized in the competition EMSA.**

**(A).** Schematic of probes used in competition EMSA of DNA in complex with recombinant YY1. Radioactively labeled 30-bp DNA probe containing YY1 consensus binding motif derived from the promoter region of *Rpl30* gene (probe1), DNA probe with the same sequence containing 30-nt RNA derived from the promoter region of *Arid1a* gene at each 3' end of the DNA (probe 2), or 1:2 mixture of radioactively labeled 30-bp DNA containing YY1 consensus binding motif derived from the promoter region of *Rpl30* gene and 30-nt cold RNA derived from the promoter region of *Arid1a* gene (probe 3) was incubated with various concentrations of the recombinant YY1.

**(B).** EMSA of YY1-DNA complexes at different concentrations of recombinant YY1. 0.1 pmole of radioactively labeled probes described in **A** was incubated with increasing concentrations of recombinant YY1. Concentrations of the YY1 protein in binding reactions are displayed above the image. Arrows indicate positions of the corresponding free and bound probes.

**(C).** Graph depicting relationship between fraction of the radioactively labeled probes described in **A** bound by YY1 and concentration of YY1 in binding reactions.

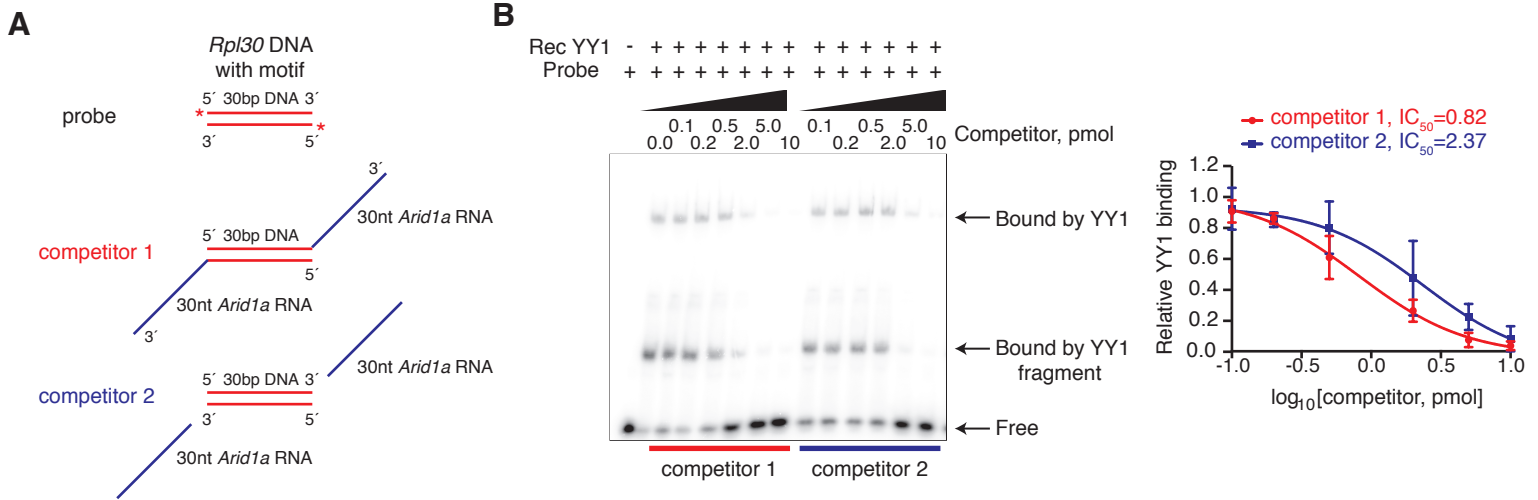

**Fig. S15. DNA containing tethered RNA outcompetes DNA with untethered RNA in competition EMSA.**

(A). Schematic of probes and competitors used in competition EMSA of DNA in complex with recombinant YY1. A radioactively labeled 30-bp DNA probe containing YY1 consensus binding motif derived from the promoter region of *Rpl30* gene was incubated with 200 nM of recombinant YY1 in the presence and absence of cold DNA competitor with the same sequence containing 30-nt RNA derived from the promoter region of *Arid1a* gene at each 3' end of the duplex DNA (competitor 1) or a 1:2 mixture of cold 30-bp DNA containing YY1 consensus binding motif derived from the promoter region of *Rpl30* gene and 30-nt RNA derived from the promoter region of *Arid1a* gene (competitor 2).

(B). (left) EMSA analysis of DNA in complex with recombinant YY1 (Rec YY1) in the presence and absence of competitor DNA. Competition assays were conducted with increasing amounts of the two competitors described in A. (right) Graph depicting the relationship between fraction of the radioactively labeled DNA probe bound by YY1 and the level of cold competitor in the binding reaction.  $IC_{50}$  values for the two competitors are shown above the graph. The difference between  $\log(IC_{50})$  values for the two competitors is significant:  $p$ -value < 0.05.  $p$ -value is estimated using the two-tailed  $t$ -test.

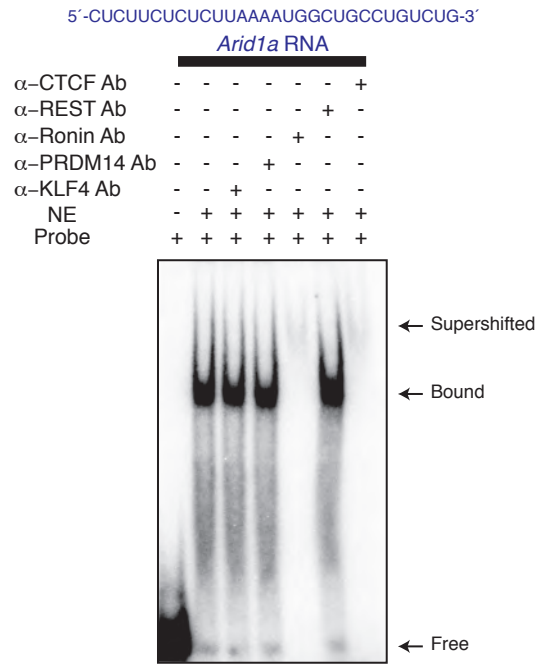

**Fig. S16. EMSA of various transcription factors in complexes with RNA.**

10  $\mu$ l of ESC nuclear extract (NE) was incubated with 30-nt radioactively labeled RNA probe derived from the promoter region of *Arid1a* gene, and specific antibodies recognizing various TFs were added to the EMSA reaction to identify TFs bound to the probe. Ronin and CTCF antibodies were able to retard the RNA-protein complexes formed in the NE, suggesting that both Ronin and CTCF were bound to the RNA. For supershift assay, 0.5  $\mu$ l of KLF4 antibodies (R&D, #AF3158), PRDM14 antibodies (Millipore, #4350), Ronin antibodies (Millipore, #ABE567), REST antibodies (Abcam, #26635), or CTCF antibodies (Millipore, #07-729) was added to the RNA probe pre-incubated with NE. Sequence of the RNA probe is shown above the image. The arrows indicate free probe, bound probe, and supershifted probe.

## **SUPPLEMENTARY TABLES**

**Table S1.** GEO numbers for the datasets used in this study.

**Table S2.** YY1 ChIP-seq enriched regions.

**Table S3.** YY1 CLIP-seq enriched regions.

**Table S1. GEO numbers for the datasets used in this study.**

| Experiment | IP Sample ID | Control Sample ID |
|------------|--------------|-------------------|
|------------|--------------|-------------------|

**Fig. 1B metagenes**

|         |            |     |
|---------|------------|-----|
| GRO-seq | GSM1665566 | N/A |
|---------|------------|-----|

**Fig. 1C *Arid1a* track**

|              |            |     |
|--------------|------------|-----|
| YY1 ChIP-seq | GSM1665561 | N/A |
| YY1 CLIP-seq | GSM1665564 | N/A |
| GRO-seq      | GSM1665566 | N/A |

**Fig. 1D metagenes**

|              |            |     |
|--------------|------------|-----|
| YY1 ChIP-seq | GSM1665561 | N/A |
| YY1 CLIP-seq | GSM1665564 | N/A |

**Fig. 3B metagenes**

|                             |            |                                          |
|-----------------------------|------------|------------------------------------------|
| DRB -> Release GRO-seq      | GSM1579227 | N/A                                      |
| DRB GRO-seq                 | GSM1579224 | N/A                                      |
| DRB -> Release YY1 ChIP-seq | GSM1904538 | GSM1665554,<br>GSM1665557,<br>GSM1665560 |
| DRB YY1 ChIP-seq            | GSM1665556 | GSM1665554,<br>GSM1665557,<br>GSM1665560 |

**Fig. 3C boxplots/metagenes**

|                                     |                           |                           |
|-------------------------------------|---------------------------|---------------------------|
| Control (shLuciferase) RNA-seq      | GSM1904550                | N/A                       |
| sh <i>Exosc3</i> RNA-seq            | GSM1904549                | N/A                       |
| Control (shLuciferase) YY1 ChIP-seq | GSM1904540,<br>GSM1904541 | GSM1904542,<br>GSM1904539 |
| sh <i>Exosc3</i> YY1 ChIP-seq       | GSM1904546,<br>GSM1904545 | GSM1904544,<br>GSM1904543 |

**fig. S1A**

|                     |                                          |     |
|---------------------|------------------------------------------|-----|
| OSN merged ChIP-seq | GSM1082340,<br>GSM1082341,<br>GSM1082342 | N/A |
| YY1 ChIP-seq        | GSM1665561                               | N/A |
| YY1 CLIP-seq        | GSM1665564                               | N/A |
| Control CLIP-seq    | GSM1665565                               | N/A |
| GRO-seq             | GSM1665566                               | N/A |

**fig. S1B**

|               |            |     |
|---------------|------------|-----|
| Oct4 ChIP-seq | GSM1082340 | N/A |
| YY1 ChIP-seq  | GSM1665561 | N/A |
| YY1 CLIP-seq  | GSM1665564 | N/A |

**fig. 1C heatmaps**

|              |            |     |
|--------------|------------|-----|
| YY1 ChIP-seq | GSM1665561 | N/A |
| YY1 CLIP-seq | GSM1665564 | N/A |



**Table S1. GEO numbers for the datasets used in this study.**

| <b>fig. S2 metagenes</b> |                          |     |
|--------------------------|--------------------------|-----|
| GRO-seq                  | GSM1665566               | N/A |
| OCT4 ChIP-seq            | GSM1082340               | N/A |
| YY1 ChIP-seq             | GSM1665561               | N/A |
| YY1 CLIP-seq             | GSM1665564               | N/A |
| H3K4me3 ChIP-seq         | GSM1082344,<br>GSM307149 | N/A |

  

| <b>fig. S3B flowchart</b> |            |     |
|---------------------------|------------|-----|
| YY1 CLIP-seq              | GSM1665564 | N/A |
| Control CLIP-seq          | GSM1665565 | N/A |

  

| <b>fig. S4 bar-plots</b> |            |     |
|--------------------------|------------|-----|
| YY1 ChIP-seq             | GSM1665561 | N/A |
| YY1 CLIP-seq             | GSM1665564 | N/A |
| OCT4 ChIP-seq            | GSM1082340 | N/A |
| PolyA RNA-seq            | GSM1246869 | N/A |
| Ribo-depleted RNA-seq    | GSM903663  | N/A |
| GRO-seq                  | GSM1665566 | N/A |

  

| <b>fig. S5</b> |            |            |
|----------------|------------|------------|
| YY1 CLIP-seq   | GSM1665564 | GSM1665565 |
| Oct4 CLIP-seq  | GSE68196   | GSE68196   |

  

| <b>fig. S10B</b>       |            |                                          |
|------------------------|------------|------------------------------------------|
| Untreated GRO-seq      | GSM1579223 | N/A                                      |
| Untreated YY1 ChIP-seq | GSM1665555 | GSM1665554,<br>GSM1665557,<br>GSM1665560 |
| DRB GRO-seq            | GSM1579224 | N/A                                      |
| DRB YY1 ChIP-seq       | GSM1665556 | GSM1665554,<br>GSM1665557,<br>GSM1665560 |

  

| <b>fig. S10C</b>       |            |                                          |
|------------------------|------------|------------------------------------------|
| Untreated GRO-seq      | GSM1665567 |                                          |
| ActD GRO-seq           | GSM1665568 |                                          |
| Untreated YY1 ChIP-seq | GSM1665558 | GSM1665554,<br>GSM1665557,<br>GSM1665560 |
| ActD YY1 ChIP-seq      | GSM1665559 | GSM1665554,<br>GSM1665557,<br>GSM1665560 |

  

| <b>fig. S10D</b>  |            |                                          |
|-------------------|------------|------------------------------------------|
| YY1 ChIP-seq      | GSM1665561 | GSM1665554,<br>GSM1665557,<br>GSM1665560 |
| THZ1 YY1 ChIP-seq | GSM1665562 | GSM1665554,<br>GSM1665557,<br>GSM1665560 |

**Table S1. GEO numbers for the datasets used in this study.**

|                  |            |                                          |
|------------------|------------|------------------------------------------|
| TPI YY1 ChIP-seq | GSM1665563 | GSM1665554,<br>GSM1665557,<br>GSM1665560 |
|------------------|------------|------------------------------------------|

**fig. S12A boxplot**

|                                |            |     |
|--------------------------------|------------|-----|
| Control (shLuciferase) RNA-seq | GSM1904550 | N/A |
| sh <i>Exosc3</i> RNA-seq       | GSM1904549 | N/A |

**Table S2. YY1 ChIP-seq enriched regions.**

|      |          |          |
|------|----------|----------|
| chr1 | 4481511  | 4483882  |
| chr1 | 4580832  | 4581845  |
| chr1 | 4775112  | 4776157  |
| chr1 | 4796990  | 4798631  |
| chr1 | 5982471  | 5983568  |
| chr1 | 6204178  | 6205503  |
| chr1 | 6372600  | 6373550  |
| chr1 | 7261294  | 7262403  |
| chr1 | 7387680  | 7388786  |
| chr1 | 8580701  | 8581408  |
| chr1 | 9459276  | 9461346  |
| chr1 | 9534801  | 9536570  |
| chr1 | 9737909  | 9739004  |
| chr1 | 9847129  | 9848171  |
| chr1 | 9933104  | 9934607  |
| chr1 | 10005759 | 10007011 |
| chr1 | 10027023 | 10028651 |
| chr1 | 10221861 | 10223839 |
| chr1 | 10982155 | 10984415 |
| chr1 | 12701274 | 12702400 |
| chr1 | 13005032 | 13006536 |
| chr1 | 13123020 | 13124734 |
| chr1 | 13363366 | 13364966 |
| chr1 | 13579086 | 13580787 |
| chr1 | 13649854 | 13651325 |
| chr1 | 14472176 | 14472900 |
| chr1 | 15633502 | 15635252 |
| chr1 | 15666940 | 15668012 |
| chr1 | 15781003 | 15782140 |
| chr1 | 15795103 | 15796593 |
| chr1 | 16093428 | 16096603 |
| chr1 | 16608248 | 16609831 |
| chr1 | 16655016 | 16656326 |
| chr1 | 17086803 | 17088345 |
| chr1 | 18526762 | 18527498 |
| chr1 | 19439960 | 19441089 |
| chr1 | 20421921 | 20422838 |
| chr1 | 20467401 | 20468429 |
| chr1 | 20809728 | 20810983 |
| chr1 | 20924490 | 20926009 |
| chr1 | 21245663 | 21246999 |

|      |          |          |
|------|----------|----------|
| chr1 | 21450883 | 21451970 |
| chr1 | 21693626 | 21695070 |
| chr1 | 21950107 | 21952850 |
| chr1 | 23313848 | 23315197 |
| chr1 | 24011961 | 24012816 |
| chr1 | 24685005 | 24686001 |
| chr1 | 25333463 | 25334252 |
| chr1 | 25944114 | 25945814 |
| chr1 | 25980806 | 25981747 |
| chr1 | 26873992 | 26875188 |
| chr1 | 28249356 | 28250550 |
| chr1 | 28344247 | 28344821 |
| chr1 | 28679095 | 28680179 |
| chr1 | 29820290 | 29821056 |
| chr1 | 29868672 | 29869454 |
| chr1 | 30910207 | 30910913 |
| chr1 | 30929424 | 30931752 |
| chr1 | 31005278 | 31007308 |
| chr1 | 31208108 | 31208721 |
| chr1 | 31757940 | 31758410 |
| chr1 | 32131057 | 32131740 |
| chr1 | 32228693 | 32230143 |
| chr1 | 32526815 | 32527377 |
| chr1 | 33869965 | 33872161 |
| chr1 | 34046081 | 34047263 |
| chr1 | 34495062 | 34497628 |
| chr1 | 34593390 | 34595191 |
| chr1 | 34858454 | 34860143 |
| chr1 | 34916417 | 34917936 |
| chr1 | 34986040 | 34987829 |
| chr1 | 36300503 | 36301683 |
| chr1 | 36501472 | 36502913 |
| chr1 | 36567933 | 36569126 |
| chr1 | 36603422 | 36605114 |
| chr1 | 36738552 | 36740812 |
| chr1 | 36747527 | 36749249 |
| chr1 | 36826808 | 36829096 |
| chr1 | 36995415 | 36997631 |
| chr1 | 37013896 | 37015234 |
| chr1 | 37043560 | 37045634 |
| chr1 | 37465933 | 37467450 |
| chr1 | 37485713 | 37487748 |
| chr1 | 37921262 | 37923121 |

|      |          |          |
|------|----------|----------|
| chr1 | 37984770 | 37985860 |
| chr1 | 38053523 | 38055726 |
| chr1 | 39423826 | 39426133 |
| chr1 | 39654042 | 39655836 |
| chr1 | 39706801 | 39708279 |
| chr1 | 39784649 | 39785733 |
| chr1 | 40846916 | 40848214 |
| chr1 | 42569287 | 42570260 |
| chr1 | 42754163 | 42756004 |
| chr1 | 42907592 | 42909390 |
| chr1 | 43009469 | 43010852 |
| chr1 | 43154883 | 43156049 |
| chr1 | 43756538 | 43757199 |
| chr1 | 43990185 | 43991582 |
| chr1 | 44158748 | 44159760 |
| chr1 | 44518452 | 44519133 |
| chr1 | 44786453 | 44786930 |
| chr1 | 45213922 | 45214910 |
| chr1 | 45851268 | 45853414 |
| chr1 | 47133255 | 47134026 |
| chr1 | 47162345 | 47163058 |
| chr1 | 47205987 | 47206798 |
| chr1 | 48602233 | 48602782 |
| chr1 | 52065078 | 52066027 |
| chr1 | 52288614 | 52290727 |
| chr1 | 53008771 | 53010476 |
| chr1 | 53767732 | 53768504 |
| chr1 | 53841177 | 53842679 |
| chr1 | 53923102 | 53923820 |
| chr1 | 54443302 | 54444410 |
| chr1 | 55083053 | 55084847 |
| chr1 | 55109176 | 55110362 |
| chr1 | 55143524 | 55146072 |
| chr1 | 55187165 | 55188864 |
| chr1 | 55418801 | 55420919 |
| chr1 | 55539187 | 55540237 |
| chr1 | 55554148 | 55555024 |
| chr1 | 56436942 | 56437567 |
| chr1 | 56521317 | 56522648 |
| chr1 | 56770854 | 56771609 |
| chr1 | 57153190 | 57154378 |
| chr1 | 57462795 | 57464756 |
| chr1 | 58051884 | 58053647 |

|      |          |          |
|------|----------|----------|
| chr1 | 58479869 | 58481274 |
| chr1 | 58561028 | 58562349 |
| chr1 | 58733167 | 58734479 |
| chr1 | 58769953 | 58771275 |
| chr1 | 58793178 | 58794804 |
| chr1 | 59029650 | 59031480 |
| chr1 | 59127678 | 59128894 |
| chr1 | 59150699 | 59152127 |
| chr1 | 59176501 | 59177730 |
| chr1 | 59423351 | 59425414 |
| chr1 | 59538172 | 59542474 |
| chr1 | 59580174 | 59581558 |
| chr1 | 59740948 | 59742580 |
| chr1 | 59818998 | 59820193 |
| chr1 | 59969368 | 59970310 |
| chr1 | 60465461 | 60467396 |
| chr1 | 61554720 | 61556034 |
| chr1 | 61570040 | 61570719 |
| chr1 | 61685151 | 61686735 |
| chr1 | 62341185 | 62342359 |
| chr1 | 63160915 | 63161676 |
| chr1 | 63222294 | 63224763 |
| chr1 | 63245815 | 63247820 |
| chr1 | 63293525 | 63294421 |
| chr1 | 63776414 | 63778366 |
| chr1 | 63850564 | 63851395 |
| chr1 | 64167573 | 64169403 |
| chr1 | 64577808 | 64580462 |
| chr1 | 64781162 | 64784347 |
| chr1 | 65543220 | 65543806 |
| chr1 | 65704491 | 65705098 |
| chr1 | 66746661 | 66748431 |
| chr1 | 67248085 | 67248678 |
| chr1 | 67297580 | 67298261 |
| chr1 | 69423000 | 69425211 |
| chr1 | 69873140 | 69874300 |
| chr1 | 70255116 | 70255676 |
| chr1 | 71148786 | 71150204 |
| chr1 | 71296857 | 71297517 |
| chr1 | 71858494 | 71859704 |
| chr1 | 72353022 | 72354519 |
| chr1 | 72629372 | 72630395 |
| chr1 | 72757465 | 72758640 |

|      |          |          |
|------|----------|----------|
| chr1 | 74282214 | 74284130 |
| chr1 | 74330366 | 74332747 |
| chr1 | 74422381 | 74423989 |
| chr1 | 74437582 | 74444262 |
| chr1 | 74551665 | 74554033 |
| chr1 | 74647188 | 74648506 |
| chr1 | 74994114 | 74995863 |
| chr1 | 75138690 | 75140167 |
| chr1 | 75187800 | 75189447 |
| chr1 | 75340712 | 75343087 |
| chr1 | 75345848 | 75346681 |
| chr1 | 75473755 | 75476604 |
| chr1 | 75499269 | 75501000 |
| chr1 | 75590191 | 75593434 |
| chr1 | 75711681 | 75712678 |
| chr1 | 76689093 | 76689806 |
| chr1 | 78005197 | 78006172 |
| chr1 | 78653669 | 78655287 |
| chr1 | 78876468 | 78877577 |
| chr1 | 79376530 | 79377791 |
| chr1 | 79757205 | 79759261 |
| chr1 | 79772283 | 79773212 |
| chr1 | 82279261 | 82280310 |
| chr1 | 82720403 | 82722453 |
| chr1 | 82921147 | 82922173 |
| chr1 | 82956415 | 82957678 |
| chr1 | 83513697 | 83514227 |
| chr1 | 84375858 | 84376604 |
| chr1 | 84835279 | 84837527 |
| chr1 | 84844643 | 84846599 |
| chr1 | 84865218 | 84866998 |
| chr1 | 84886629 | 84888601 |
| chr1 | 87790782 | 87792641 |
| chr1 | 87825404 | 87826834 |
| chr1 | 87960351 | 87962117 |
| chr1 | 88199209 | 88200867 |
| chr1 | 88254591 | 88257592 |
| chr1 | 88336591 | 88340311 |
| chr1 | 88367577 | 88370744 |
| chr1 | 88383314 | 88385497 |
| chr1 | 88399570 | 88401737 |
| chr1 | 88405140 | 88407169 |
| chr1 | 88421017 | 88426251 |

|      |           |           |
|------|-----------|-----------|
| chr1 | 88478791  | 88479991  |
| chr1 | 88480587  | 88481838  |
| chr1 | 88482990  | 88484437  |
| chr1 | 88982760  | 88984772  |
| chr1 | 88994939  | 88996314  |
| chr1 | 89050039  | 89053686  |
| chr1 | 89160389  | 89161739  |
| chr1 | 89222766  | 89224690  |
| chr1 | 89572196  | 89573702  |
| chr1 | 90101375  | 90102808  |
| chr1 | 90172434  | 90175416  |
| chr1 | 90180546  | 90182420  |
| chr1 | 90911811  | 90913349  |
| chr1 | 91026900  | 91028653  |
| chr1 | 91542750  | 91543997  |
| chr1 | 92171778  | 92173858  |
| chr1 | 92499348  | 92500663  |
| chr1 | 92939674  | 92941441  |
| chr1 | 93294240  | 93295851  |
| chr1 | 93697914  | 93699728  |
| chr1 | 94076763  | 94078237  |
| chr1 | 94647397  | 94649148  |
| chr1 | 94815250  | 94817294  |
| chr1 | 94874763  | 94876588  |
| chr1 | 94996010  | 94999325  |
| chr1 | 95123235  | 95126102  |
| chr1 | 95131552  | 95134877  |
| chr1 | 95201905  | 95202873  |
| chr1 | 95238592  | 95240840  |
| chr1 | 95374269  | 95376596  |
| chr1 | 95500347  | 95501427  |
| chr1 | 95530990  | 95533328  |
| chr1 | 95650110  | 95652209  |
| chr1 | 95697326  | 95701403  |
| chr1 | 99556989  | 99558810  |
| chr1 | 100262282 | 100263392 |
| chr1 | 100281554 | 100282111 |
| chr1 | 101568172 | 101568740 |
| chr1 | 103170156 | 103170913 |
| chr1 | 103989109 | 103989810 |
| chr1 | 107251988 | 107253728 |
| chr1 | 107559564 | 107561583 |
| chr1 | 107826400 | 107827323 |



|      |           |           |
|------|-----------|-----------|
| chr1 | 107887587 | 107888731 |
| chr1 | 107889864 | 107890998 |
| chr1 | 108015296 | 108016563 |
| chr1 | 108333748 | 108334438 |
| chr1 | 108751691 | 108752334 |
| chr1 | 109515763 | 109516475 |
| chr1 | 111267786 | 111269011 |
| chr1 | 111371613 | 111372409 |
| chr1 | 112305598 | 112306430 |
| chr1 | 114116935 | 114117564 |
| chr1 | 114350898 | 114351677 |
| chr1 | 114718666 | 114719409 |
| chr1 | 114734024 | 114735674 |
| chr1 | 116080132 | 116080869 |
| chr1 | 116126250 | 116127027 |
| chr1 | 116453496 | 116454997 |
| chr1 | 116667366 | 116667956 |
| chr1 | 118313121 | 118313750 |
| chr1 | 118758746 | 118759339 |
| chr1 | 118825864 | 118826565 |
| chr1 | 120171314 | 120172364 |
| chr1 | 120207282 | 120208241 |
| chr1 | 120217602 | 120219267 |
| chr1 | 120673013 | 120674378 |
| chr1 | 121195934 | 121197140 |
| chr1 | 121197547 | 121199917 |
| chr1 | 121316430 | 121320390 |
| chr1 | 121339806 | 121341509 |
| chr1 | 121544526 | 121546474 |
| chr1 | 121640592 | 121641701 |
| chr1 | 121733150 | 121735067 |
| chr1 | 121957374 | 121958983 |
| chr1 | 121959454 | 121960829 |
| chr1 | 122236582 | 122240000 |
| chr1 | 122637265 | 122638923 |
| chr1 | 123223254 | 123225112 |
| chr1 | 123423570 | 123425760 |
| chr1 | 123463716 | 123465069 |
| chr1 | 123634166 | 123634848 |
| chr1 | 124900180 | 124900857 |
| chr1 | 125386244 | 125387282 |
| chr1 | 126817749 | 126818893 |
| chr1 | 126868363 | 126869354 |

|      |           |           |
|------|-----------|-----------|
| chr1 | 127331121 | 127332950 |
| chr1 | 127584072 | 127585537 |
| chr1 | 127626096 | 127627849 |
| chr1 | 128190299 | 128191028 |
| chr1 | 128748334 | 128749257 |
| chr1 | 129669949 | 129671743 |
| chr1 | 129764803 | 129766050 |
| chr1 | 129812823 | 129813678 |
| chr1 | 129934518 | 129935899 |
| chr1 | 129998607 | 130000682 |
| chr1 | 130140110 | 130141518 |
| chr1 | 130255348 | 130256767 |
| chr1 | 131168902 | 131170721 |
| chr1 | 131332663 | 131333253 |
| chr1 | 132387030 | 132388057 |
| chr1 | 132611932 | 132614653 |
| chr1 | 132992901 | 132994704 |
| chr1 | 133034561 | 133036036 |
| chr1 | 133048862 | 133050254 |
| chr1 | 133057081 | 133058690 |
| chr1 | 133140486 | 133142995 |
| chr1 | 133624681 | 133626333 |
| chr1 | 133806477 | 133808628 |
| chr1 | 134093876 | 134095747 |
| chr1 | 134159868 | 134162447 |
| chr1 | 134184202 | 134186209 |
| chr1 | 134313087 | 134315311 |
| chr1 | 134416952 | 134418708 |
| chr1 | 134921444 | 134922425 |
| chr1 | 134975321 | 134977516 |
| chr1 | 134990924 | 134992611 |
| chr1 | 135009027 | 135010643 |
| chr1 | 135026928 | 135029883 |
| chr1 | 135073455 | 135075595 |
| chr1 | 135281158 | 135283337 |
| chr1 | 135307290 | 135310143 |
| chr1 | 135318722 | 135321012 |
| chr1 | 135506205 | 135507614 |
| chr1 | 135556823 | 135558434 |
| chr1 | 135565092 | 135565865 |
| chr1 | 135566266 | 135567365 |
| chr1 | 135638122 | 135639812 |
| chr1 | 135781451 | 135783507 |

|      |           |           |
|------|-----------|-----------|
| chr1 | 136222535 | 136226339 |
| chr1 | 136240092 | 136242231 |
| chr1 | 136257827 | 136259151 |
| chr1 | 136420618 | 136422390 |
| chr1 | 136456556 | 136458002 |
| chr1 | 136851324 | 136852964 |
| chr1 | 136883196 | 136884892 |
| chr1 | 137000364 | 137001982 |
| chr1 | 137057061 | 137058449 |
| chr1 | 137130428 | 137132030 |
| chr1 | 137179403 | 137181348 |
| chr1 | 137209340 | 137210750 |
| chr1 | 137326044 | 137327940 |
| chr1 | 137583204 | 137585364 |
| chr1 | 137615823 | 137617624 |
| chr1 | 137913832 | 137915573 |
| chr1 | 138027395 | 138029139 |
| chr1 | 138055039 | 138057368 |
| chr1 | 138112124 | 138113101 |
| chr1 | 138156067 | 138157991 |
| chr1 | 138241427 | 138243255 |
| chr1 | 138466478 | 138467503 |
| chr1 | 138591200 | 138593026 |
| chr1 | 139112490 | 139113665 |
| chr1 | 140208537 | 140209284 |
| chr1 | 140684546 | 140685788 |
| chr1 | 140753013 | 140753798 |
| chr1 | 141018970 | 141019724 |
| chr1 | 141612820 | 141613298 |
| chr1 | 142222594 | 142223808 |
| chr1 | 142545247 | 142545945 |
| chr1 | 142819701 | 142820863 |
| chr1 | 145263469 | 145264004 |
| chr1 | 145548701 | 145550472 |
| chr1 | 145708618 | 145709614 |
| chr1 | 147102248 | 147102879 |
| chr1 | 147268056 | 147268879 |
| chr1 | 148252718 | 148253874 |
| chr1 | 149120275 | 149120882 |
| chr1 | 149741995 | 149742712 |
| chr1 | 151305006 | 151305872 |
| chr1 | 152078782 | 152079951 |
| chr1 | 152239201 | 152241077 |

|      |           |           |
|------|-----------|-----------|
| chr1 | 152894707 | 152895872 |
| chr1 | 153190733 | 153192751 |
| chr1 | 153274636 | 153276537 |
| chr1 | 153347149 | 153348507 |
| chr1 | 153391429 | 153393538 |
| chr1 | 153601916 | 153603578 |
| chr1 | 154137833 | 154139617 |
| chr1 | 154233214 | 154234237 |
| chr1 | 154246676 | 154248287 |
| chr1 | 154612933 | 154614737 |
| chr1 | 154626328 | 154627166 |
| chr1 | 154748547 | 154751223 |
| chr1 | 155178456 | 155180150 |
| chr1 | 155271533 | 155273340 |
| chr1 | 155333634 | 155335572 |
| chr1 | 155353353 | 155354539 |
| chr1 | 156051006 | 156053314 |
| chr1 | 157090863 | 157092888 |
| chr1 | 157124181 | 157125572 |
| chr1 | 157263611 | 157265005 |
| chr1 | 157819535 | 157821592 |
| chr1 | 157882352 | 157884638 |
| chr1 | 158488256 | 158489997 |
| chr1 | 158883739 | 158885520 |
| chr1 | 159369662 | 159371117 |
| chr1 | 159529995 | 159530829 |
| chr1 | 160809321 | 160810089 |
| chr1 | 162093365 | 162094202 |
| chr1 | 162124959 | 162126072 |
| chr1 | 162142002 | 162143731 |
| chr1 | 162402930 | 162403998 |
| chr1 | 162835819 | 162837737 |
| chr1 | 162999705 | 163002082 |
| chr1 | 163072611 | 163073882 |
| chr1 | 163102119 | 163104097 |
| chr1 | 163179982 | 163181834 |
| chr1 | 163373043 | 163374385 |
| chr1 | 163602106 | 163602874 |
| chr1 | 163805803 | 163808454 |
| chr1 | 163993398 | 163994106 |
| chr1 | 164050283 | 164050997 |
| chr1 | 164419094 | 164420057 |
| chr1 | 164475617 | 164476772 |

|      |           |           |
|------|-----------|-----------|
| chr1 | 164477740 | 164479080 |
| chr1 | 164544813 | 164546739 |
| chr1 | 164669262 | 164671114 |
| chr1 | 164749295 | 164750400 |
| chr1 | 164762064 | 164763182 |
| chr1 | 165709295 | 165710765 |
| chr1 | 165713476 | 165714336 |
| chr1 | 165858749 | 165861062 |
| chr1 | 166081648 | 166082504 |
| chr1 | 166177900 | 166179843 |
| chr1 | 166245089 | 166246026 |
| chr1 | 166672791 | 166674058 |
| chr1 | 166899767 | 166901110 |
| chr1 | 167204880 | 167205888 |
| chr1 | 167333810 | 167335146 |
| chr1 | 167389561 | 167392036 |
| chr1 | 167456316 | 167457134 |
| chr1 | 167571932 | 167573408 |
| chr1 | 167693512 | 167694895 |
| chr1 | 167930629 | 167934046 |
| chr1 | 168087548 | 168089392 |
| chr1 | 168168223 | 168169471 |
| chr1 | 168308415 | 168310352 |
| chr1 | 168338723 | 168340365 |
| chr1 | 168354739 | 168355353 |
| chr1 | 168405247 | 168406315 |
| chr1 | 168842362 | 168842982 |
| chr1 | 169213229 | 169215955 |
| chr1 | 169237770 | 169239528 |
| chr1 | 169279787 | 169280996 |
| chr1 | 169718691 | 169720263 |
| chr1 | 170286347 | 170288220 |
| chr1 | 171918350 | 171919369 |
| chr1 | 172144918 | 172146420 |
| chr1 | 172185268 | 172186112 |
| chr1 | 172497151 | 172497958 |
| chr1 | 172622961 | 172624871 |
| chr1 | 172814847 | 172815963 |
| chr1 | 173080004 | 173081781 |
| chr1 | 173150767 | 173153735 |
| chr1 | 173176111 | 173178246 |
| chr1 | 173180591 | 173184113 |
| chr1 | 173199743 | 173201585 |

|      |           |           |
|------|-----------|-----------|
| chr1 | 173216695 | 173218971 |
| chr1 | 173223920 | 173225744 |
| chr1 | 173258091 | 173260585 |
| chr1 | 173275082 | 173276682 |
| chr1 | 173340681 | 173342250 |
| chr1 | 173423891 | 173425004 |
| chr1 | 173432777 | 173435025 |
| chr1 | 173983653 | 173984918 |
| chr1 | 174012252 | 174013467 |
| chr1 | 174056001 | 174058231 |
| chr1 | 174077170 | 174079243 |
| chr1 | 174230298 | 174233312 |
| chr1 | 174255532 | 174257695 |
| chr1 | 174491352 | 174494322 |
| chr1 | 177555120 | 177556242 |
| chr1 | 177688585 | 177689771 |
| chr1 | 177810398 | 177811447 |
| chr1 | 177908601 | 177909367 |
| chr1 | 178126473 | 178127108 |
| chr1 | 178334645 | 178335608 |
| chr1 | 178927656 | 178928968 |
| chr1 | 179550284 | 179551629 |
| chr1 | 179912819 | 179914230 |
| chr1 | 180117222 | 180118459 |
| chr1 | 180205634 | 180207350 |
| chr1 | 180247987 | 180249985 |
| chr1 | 180266323 | 180268836 |
| chr1 | 180335642 | 180337033 |
| chr1 | 180457283 | 180461474 |
| chr1 | 181475631 | 181477168 |
| chr1 | 181732932 | 181734803 |
| chr1 | 181888846 | 181890059 |
| chr1 | 182155370 | 182158111 |
| chr1 | 182185583 | 182187212 |
| chr1 | 182570494 | 182572478 |
| chr1 | 182626341 | 182628148 |
| chr1 | 182655442 | 182656863 |
| chr1 | 182697134 | 182699323 |
| chr1 | 182742518 | 182744921 |
| chr1 | 182759822 | 182761353 |
| chr1 | 182780275 | 182781889 |
| chr1 | 183141948 | 183142936 |
| chr1 | 183498992 | 183499874 |

|       |           |           |
|-------|-----------|-----------|
| chr1  | 183684462 | 183685593 |
| chr1  | 183771303 | 183773233 |
| chr1  | 184270976 | 184272563 |
| chr1  | 184338259 | 184340090 |
| chr1  | 184429918 | 184432044 |
| chr1  | 184469103 | 184469976 |
| chr1  | 184797604 | 184800209 |
| chr1  | 186705576 | 186707922 |
| chr1  | 186822182 | 186823450 |
| chr1  | 187071112 | 187072313 |
| chr1  | 187126358 | 187127606 |
| chr1  | 187278071 | 187279532 |
| chr1  | 187939953 | 187941497 |
| chr1  | 188572161 | 188573800 |
| chr1  | 188790293 | 188792919 |
| chr1  | 189201776 | 189203338 |
| chr1  | 190830786 | 190832145 |
| chr1  | 191404931 | 191406440 |
| chr1  | 191673369 | 191675790 |
| chr1  | 191842378 | 191844252 |
| chr1  | 192306739 | 192307795 |
| chr1  | 192752000 | 192753397 |
| chr1  | 192886403 | 192888126 |
| chr1  | 193141128 | 193142530 |
| chr1  | 193149083 | 193150857 |
| chr1  | 193398143 | 193400373 |
| chr1  | 193432693 | 193433363 |
| chr1  | 193641153 | 193642521 |
| chr1  | 193730522 | 193732470 |
| chr1  | 193751284 | 193753650 |
| chr1  | 194591502 | 194592358 |
| chr1  | 194596363 | 194597646 |
| chr1  | 194860780 | 194862721 |
| chr1  | 194895984 | 194897206 |
| chr1  | 195364599 | 195365543 |
| chr1  | 196956870 | 196958139 |
| chr10 | 3133634   | 3135875   |
| chr10 | 3321945   | 3323093   |
| chr10 | 3537277   | 3537748   |
| chr10 | 4540012   | 4541926   |
| chr10 | 5256366   | 5256962   |
| chr10 | 5434885   | 5435952   |
| chr10 | 5637680   | 5638561   |

|       |          |          |
|-------|----------|----------|
| chr10 | 6077185  | 6078829  |
| chr10 | 6096776  | 6097795  |
| chr10 | 6372321  | 6373946  |
| chr10 | 6404714  | 6407060  |
| chr10 | 6502579  | 6504212  |
| chr10 | 6753747  | 6754874  |
| chr10 | 7382286  | 7384055  |
| chr10 | 7399787  | 7401942  |
| chr10 | 7499761  | 7501473  |
| chr10 | 7512198  | 7513469  |
| chr10 | 7675897  | 7676871  |
| chr10 | 7977280  | 7978423  |
| chr10 | 8236834  | 8239292  |
| chr10 | 8257573  | 8259403  |
| chr10 | 8491519  | 8493311  |
| chr10 | 8551719  | 8554619  |
| chr10 | 8605168  | 8606751  |
| chr10 | 9393977  | 9395667  |
| chr10 | 10277170 | 10278657 |
| chr10 | 10386450 | 10387303 |
| chr10 | 10868936 | 10869901 |
| chr10 | 11274877 | 11275822 |
| chr10 | 11355188 | 11356127 |
| chr10 | 12105002 | 12106066 |
| chr10 | 12329270 | 12330336 |
| chr10 | 12642143 | 12643850 |
| chr10 | 12809916 | 12811364 |
| chr10 | 12911929 | 12913471 |
| chr10 | 13272114 | 13273794 |
| chr10 | 13324444 | 13325655 |
| chr10 | 13587667 | 13589399 |
| chr10 | 13611999 | 13613210 |
| chr10 | 13922428 | 13923095 |
| chr10 | 14424717 | 14425710 |
| chr10 | 14642673 | 14643656 |
| chr10 | 16411632 | 16412307 |
| chr10 | 17442091 | 17444586 |
| chr10 | 17774314 | 17776090 |
| chr10 | 18310623 | 18312146 |
| chr10 | 18563632 | 18565501 |
| chr10 | 18626898 | 18628089 |
| chr10 | 19161246 | 19162289 |
| chr10 | 19626732 | 19628304 |



|       |          |          |
|-------|----------|----------|
| chr10 | 19705047 | 19705787 |
| chr10 | 20031451 | 20033383 |
| chr10 | 20368873 | 20369789 |
| chr10 | 20671435 | 20673054 |
| chr10 | 21015233 | 21016704 |
| chr10 | 21312248 | 21313683 |
| chr10 | 21548188 | 21550396 |
| chr10 | 21713588 | 21714910 |
| chr10 | 22328225 | 22329814 |
| chr10 | 22450431 | 22452386 |
| chr10 | 23195407 | 23196071 |
| chr10 | 23505913 | 23508027 |
| chr10 | 23942792 | 23944499 |
| chr10 | 24589403 | 24590573 |
| chr10 | 25151772 | 25153067 |
| chr10 | 26094165 | 26094917 |
| chr10 | 26095344 | 26096883 |
| chr10 | 26471946 | 26473228 |
| chr10 | 27793945 | 27795923 |
| chr10 | 28246332 | 28247006 |
| chr10 | 28866153 | 28868498 |
| chr10 | 28915834 | 28917660 |
| chr10 | 29081012 | 29082458 |
| chr10 | 29493541 | 29494160 |
| chr10 | 29935306 | 29936229 |
| chr10 | 30319771 | 30321398 |
| chr10 | 30337251 | 30338731 |
| chr10 | 30521633 | 30524256 |
| chr10 | 30774471 | 30775717 |
| chr10 | 31033080 | 31033845 |
| chr10 | 31392369 | 31393292 |
| chr10 | 31547639 | 31548870 |
| chr10 | 31605528 | 31606252 |
| chr10 | 32218585 | 32219342 |
| chr10 | 32692124 | 32692830 |
| chr10 | 33211203 | 33211924 |
| chr10 | 33228750 | 33229302 |
| chr10 | 33343377 | 33344838 |
| chr10 | 33846545 | 33848491 |
| chr10 | 34001680 | 34003760 |
| chr10 | 34153677 | 34154622 |
| chr10 | 35394582 | 35395219 |
| chr10 | 36856524 | 36858585 |

|       |          |          |
|-------|----------|----------|
| chr10 | 37984004 | 37984876 |
| chr10 | 38652059 | 38652826 |
| chr10 | 38890360 | 38891965 |
| chr10 | 39088426 | 39090348 |
| chr10 | 39251248 | 39253255 |
| chr10 | 39679359 | 39681232 |
| chr10 | 39860622 | 39862562 |
| chr10 | 39966157 | 39967939 |
| chr10 | 39976407 | 39978800 |
| chr10 | 40020329 | 40023005 |
| chr10 | 40255182 | 40257553 |
| chr10 | 40402491 | 40404559 |
| chr10 | 40602498 | 40604876 |
| chr10 | 41022358 | 41023853 |
| chr10 | 41028507 | 41029064 |
| chr10 | 41209545 | 41211324 |
| chr10 | 41238331 | 41240268 |
| chr10 | 41284603 | 41286607 |
| chr10 | 41654208 | 41655166 |
| chr10 | 41716575 | 41718475 |
| chr10 | 41750033 | 41751596 |
| chr10 | 41840086 | 41841494 |
| chr10 | 41993353 | 41998701 |
| chr10 | 42027514 | 42029739 |
| chr10 | 42197329 | 42198773 |
| chr10 | 42221084 | 42223102 |
| chr10 | 42893698 | 42894996 |
| chr10 | 42940416 | 42942450 |
| chr10 | 43196837 | 43198157 |
| chr10 | 43228711 | 43232074 |
| chr10 | 43246965 | 43248876 |
| chr10 | 43297532 | 43300109 |
| chr10 | 43620502 | 43622421 |
| chr10 | 44160381 | 44161929 |
| chr10 | 44202556 | 44204018 |
| chr10 | 44318617 | 44319935 |
| chr10 | 44786069 | 44787992 |
| chr10 | 45008739 | 45010003 |
| chr10 | 45204883 | 45207071 |
| chr10 | 45296856 | 45298589 |
| chr10 | 45558567 | 45559154 |
| chr10 | 46083488 | 46084646 |
| chr10 | 47525264 | 47525833 |

|       |          |          |
|-------|----------|----------|
| chr10 | 49828599 | 49829297 |
| chr10 | 50398941 | 50399540 |
| chr10 | 51834695 | 51835953 |
| chr10 | 52100794 | 52102350 |
| chr10 | 52136256 | 52138787 |
| chr10 | 52264885 | 52266130 |
| chr10 | 52410031 | 52411982 |
| chr10 | 52486623 | 52487943 |
| chr10 | 53154633 | 53155660 |
| chr10 | 53315841 | 53317893 |
| chr10 | 53469817 | 53471889 |
| chr10 | 54339129 | 54340665 |
| chr10 | 55224236 | 55225309 |
| chr10 | 55750646 | 55751275 |
| chr10 | 55834561 | 55836445 |
| chr10 | 55976536 | 55977118 |
| chr10 | 56006649 | 56007445 |
| chr10 | 57053422 | 57054401 |
| chr10 | 57251630 | 57252734 |
| chr10 | 57485997 | 57486825 |
| chr10 | 57513668 | 57515259 |
| chr10 | 57785316 | 57786679 |
| chr10 | 57908445 | 57910599 |
| chr10 | 58274892 | 58277747 |
| chr10 | 58989987 | 58991032 |
| chr10 | 59464781 | 59466836 |
| chr10 | 59568166 | 59570755 |
| chr10 | 59589401 | 59590230 |
| chr10 | 59713111 | 59714501 |
| chr10 | 59739647 | 59741188 |
| chr10 | 60153464 | 60155290 |
| chr10 | 60185517 | 60187662 |
| chr10 | 60236577 | 60238792 |
| chr10 | 60390512 | 60392705 |
| chr10 | 60542730 | 60544062 |
| chr10 | 60608223 | 60611749 |
| chr10 | 60666636 | 60668319 |
| chr10 | 60687360 | 60689071 |
| chr10 | 60699852 | 60701488 |
| chr10 | 60703879 | 60705672 |
| chr10 | 60747857 | 60749578 |
| chr10 | 60877522 | 60879470 |
| chr10 | 60914484 | 60915879 |

|       |          |          |
|-------|----------|----------|
| chr10 | 61087233 | 61089855 |
| chr10 | 61110430 | 61112407 |
| chr10 | 61157938 | 61159676 |
| chr10 | 61244918 | 61247583 |
| chr10 | 61439953 | 61442010 |
| chr10 | 61606488 | 61607907 |
| chr10 | 61776383 | 61778216 |
| chr10 | 61911895 | 61914220 |
| chr10 | 61948566 | 61950189 |
| chr10 | 62040331 | 62042332 |
| chr10 | 62253987 | 62256247 |
| chr10 | 62327711 | 62328782 |
| chr10 | 62382572 | 62384441 |
| chr10 | 62485165 | 62487721 |
| chr10 | 62515660 | 62517619 |
| chr10 | 62589774 | 62590871 |
| chr10 | 62891473 | 62893309 |
| chr10 | 65931374 | 65932221 |
| chr10 | 66464440 | 66466881 |
| chr10 | 66791843 | 66792958 |
| chr10 | 67010429 | 67012775 |
| chr10 | 67308558 | 67309901 |
| chr10 | 67598776 | 67600726 |
| chr10 | 67694166 | 67695225 |
| chr10 | 67819802 | 67820695 |
| chr10 | 68464652 | 68465491 |
| chr10 | 68787300 | 68788290 |
| chr10 | 68994227 | 68995982 |
| chr10 | 69034060 | 69035106 |
| chr10 | 69557556 | 69559400 |
| chr10 | 69745088 | 69748286 |
| chr10 | 69830649 | 69832438 |
| chr10 | 70060936 | 70063291 |
| chr10 | 70700073 | 70701583 |
| chr10 | 71955437 | 71955962 |
| chr10 | 72116873 | 72118693 |
| chr10 | 72900014 | 72900650 |
| chr10 | 73901925 | 73902662 |
| chr10 | 74137580 | 74138668 |
| chr10 | 74978982 | 74981115 |
| chr10 | 75025207 | 75027369 |
| chr10 | 75071309 | 75073575 |
| chr10 | 75110129 | 75113228 |

|       |          |          |
|-------|----------|----------|
| chr10 | 75355166 | 75356865 |
| chr10 | 75383139 | 75385265 |
| chr10 | 75394038 | 75396296 |
| chr10 | 75397913 | 75399439 |
| chr10 | 75456171 | 75457727 |
| chr10 | 75489722 | 75492179 |
| chr10 | 75493000 | 75493846 |
| chr10 | 75904138 | 75906057 |
| chr10 | 75993390 | 75995163 |
| chr10 | 76058508 | 76059839 |
| chr10 | 76277349 | 76278612 |
| chr10 | 76627894 | 76630153 |
| chr10 | 76654202 | 76656678 |
| chr10 | 76721358 | 76722824 |
| chr10 | 77043939 | 77045754 |
| chr10 | 77084096 | 77086051 |
| chr10 | 77313751 | 77316588 |
| chr10 | 77499335 | 77501103 |
| chr10 | 77503479 | 77507079 |
| chr10 | 77631334 | 77633413 |
| chr10 | 77926496 | 77928570 |
| chr10 | 77944154 | 77946011 |
| chr10 | 78214880 | 78216127 |
| chr10 | 78264185 | 78265099 |
| chr10 | 78272713 | 78273637 |
| chr10 | 78559623 | 78560629 |
| chr10 | 79016885 | 79019187 |
| chr10 | 79130727 | 79137064 |
| chr10 | 79166665 | 79168162 |
| chr10 | 79196778 | 79199420 |
| chr10 | 79208250 | 79209670 |
| chr10 | 79217666 | 79220687 |
| chr10 | 79314871 | 79318748 |
| chr10 | 79369538 | 79372534 |
| chr10 | 79378953 | 79384954 |
| chr10 | 79422532 | 79423834 |
| chr10 | 79446132 | 79447685 |
| chr10 | 79464606 | 79468623 |
| chr10 | 79475632 | 79478294 |
| chr10 | 79481933 | 79484437 |
| chr10 | 79501574 | 79503218 |
| chr10 | 79506539 | 79507386 |
| chr10 | 79514319 | 79517652 |

|       |          |          |
|-------|----------|----------|
| chr10 | 79519300 | 79521855 |
| chr10 | 79564489 | 79566307 |
| chr10 | 79577370 | 79580824 |
| chr10 | 79592877 | 79595320 |
| chr10 | 79599477 | 79600861 |
| chr10 | 79600869 | 79602942 |
| chr10 | 79607379 | 79613177 |
| chr10 | 79620821 | 79624253 |
| chr10 | 79629504 | 79631844 |
| chr10 | 79711501 | 79713389 |
| chr10 | 79754717 | 79756914 |
| chr10 | 79767100 | 79768332 |
| chr10 | 79987911 | 79990165 |
| chr10 | 80023523 | 80025267 |
| chr10 | 80032650 | 80035035 |
| chr10 | 80038740 | 80042417 |
| chr10 | 80118074 | 80120207 |
| chr10 | 80164374 | 80166462 |
| chr10 | 80203488 | 80205779 |
| chr10 | 80217446 | 80219083 |
| chr10 | 80268452 | 80270900 |
| chr10 | 80288675 | 80290261 |
| chr10 | 80317080 | 80319241 |
| chr10 | 80362090 | 80364456 |
| chr10 | 80380272 | 80381494 |
| chr10 | 80409841 | 80414324 |
| chr10 | 80499627 | 80500780 |
| chr10 | 80600020 | 80602172 |
| chr10 | 80629512 | 80631515 |
| chr10 | 80638354 | 80643282 |
| chr10 | 80728696 | 80730471 |
| chr10 | 80794349 | 80795987 |
| chr10 | 80840236 | 80842011 |
| chr10 | 80846412 | 80848614 |
| chr10 | 80872784 | 80875813 |
| chr10 | 80895207 | 80898116 |
| chr10 | 80925866 | 80931394 |
| chr10 | 80957602 | 80959672 |
| chr10 | 80960925 | 80962612 |
| chr10 | 81111337 | 81112161 |
| chr10 | 81545589 | 81546494 |
| chr10 | 81590338 | 81591447 |
| chr10 | 81703294 | 81705008 |

|       |          |          |
|-------|----------|----------|
| chr10 | 81816633 | 81817582 |
| chr10 | 82091789 | 82093412 |
| chr10 | 82160875 | 82162900 |
| chr10 | 82822465 | 82823720 |
| chr10 | 83005918 | 83007384 |
| chr10 | 83082864 | 83085121 |
| chr10 | 83391155 | 83393020 |
| chr10 | 84379689 | 84381093 |
| chr10 | 84490178 | 84491263 |
| chr10 | 85106899 | 85109223 |
| chr10 | 85390428 | 85392421 |
| chr10 | 85696069 | 85697197 |
| chr10 | 86258867 | 86259969 |
| chr10 | 86370973 | 86372609 |
| chr10 | 86533882 | 86534922 |
| chr10 | 87841532 | 87842935 |
| chr10 | 87921865 | 87923549 |
| chr10 | 88167962 | 88169628 |
| chr10 | 88186579 | 88188121 |
| chr10 | 88288617 | 88290040 |
| chr10 | 89206782 | 89208870 |
| chr10 | 89711335 | 89712090 |
| chr10 | 90431339 | 90433151 |
| chr10 | 90585757 | 90587455 |
| chr10 | 90633260 | 90635509 |
| chr10 | 90643252 | 90645296 |
| chr10 | 92271851 | 92272682 |
| chr10 | 92623065 | 92624879 |
| chr10 | 92740950 | 92742666 |
| chr10 | 92833811 | 92835717 |
| chr10 | 93051773 | 93053021 |
| chr10 | 93257478 | 93258915 |
| chr10 | 93296101 | 93297424 |
| chr10 | 93351264 | 93353430 |
| chr10 | 93497326 | 93499502 |
| chr10 | 93993857 | 93995478 |
| chr10 | 94150249 | 94152244 |
| chr10 | 94785918 | 94787780 |
| chr10 | 94848518 | 94850180 |
| chr10 | 94963759 | 94965353 |
| chr10 | 94976444 | 94978819 |
| chr10 | 95179372 | 95180700 |
| chr10 | 95181828 | 95183658 |

|       |           |           |
|-------|-----------|-----------|
| chr10 | 95353166  | 95354944  |
| chr10 | 95974393  | 95975328  |
| chr10 | 96136434  | 96137125  |
| chr10 | 97999772  | 98000819  |
| chr10 | 98013328  | 98013959  |
| chr10 | 98536527  | 98537427  |
| chr10 | 98723833  | 98725108  |
| chr10 | 98725174  | 98727587  |
| chr10 | 99057798  | 99059375  |
| chr10 | 99500762  | 99502422  |
| chr10 | 101895422 | 101896217 |
| chr10 | 102676397 | 102677284 |
| chr10 | 102829703 | 102832132 |
| chr10 | 104087715 | 104088462 |
| chr10 | 104574622 | 104575592 |
| chr10 | 105277555 | 105279229 |
| chr10 | 105643406 | 105643952 |
| chr10 | 106997453 | 106998230 |
| chr10 | 107598299 | 107600477 |
| chr10 | 107768450 | 107770634 |
| chr10 | 108018646 | 108020263 |
| chr10 | 110446172 | 110448095 |
| chr10 | 110734884 | 110736876 |
| chr10 | 110870434 | 110871340 |
| chr10 | 110909229 | 110911294 |
| chr10 | 111409060 | 111410463 |
| chr10 | 111861785 | 111862535 |
| chr10 | 112023642 | 112024781 |
| chr10 | 112236473 | 112237495 |
| chr10 | 113603819 | 113604429 |
| chr10 | 114472323 | 114473586 |
| chr10 | 114687480 | 114689103 |
| chr10 | 114751680 | 114753298 |
| chr10 | 114820913 | 114823200 |
| chr10 | 115460812 | 115461749 |
| chr10 | 115549825 | 115551541 |
| chr10 | 115864606 | 115866255 |
| chr10 | 116017661 | 116019638 |
| chr10 | 116386483 | 116387381 |
| chr10 | 116460229 | 116462317 |
| chr10 | 116499965 | 116501062 |
| chr10 | 116660665 | 116662996 |
| chr10 | 116747964 | 116749245 |



|       |           |           |
|-------|-----------|-----------|
| chr10 | 116812363 | 116814572 |
| chr10 | 117117870 | 117119353 |
| chr10 | 117119468 | 117121844 |
| chr10 | 117146499 | 117148722 |
| chr10 | 117372669 | 117374152 |
| chr10 | 117578258 | 117579155 |
| chr10 | 118037852 | 118039368 |
| chr10 | 118133382 | 118134250 |
| chr10 | 118305054 | 118307927 |
| chr10 | 118486730 | 118487997 |
| chr10 | 118491083 | 118492703 |
| chr10 | 118675873 | 118678246 |
| chr10 | 119206917 | 119207566 |
| chr10 | 119371770 | 119373074 |
| chr10 | 119571437 | 119572378 |
| chr10 | 119644997 | 119646500 |
| chr10 | 119764545 | 119765737 |
| chr10 | 119833509 | 119835112 |
| chr10 | 119836983 | 119838015 |
| chr10 | 120001516 | 120002568 |
| chr10 | 120143981 | 120145437 |
| chr10 | 120294424 | 120295818 |
| chr10 | 120414711 | 120417552 |
| chr10 | 120452875 | 120454539 |
| chr10 | 121155811 | 121156741 |
| chr10 | 121158026 | 121159071 |
| chr10 | 121483521 | 121485758 |
| chr10 | 121706013 | 121706624 |
| chr10 | 121828071 | 121828818 |
| chr10 | 122331410 | 122332888 |
| chr10 | 122421905 | 122423964 |
| chr10 | 122450153 | 122451691 |
| chr10 | 122512557 | 122513996 |
| chr10 | 122633128 | 122634785 |
| chr10 | 125632534 | 125633545 |
| chr10 | 126246230 | 126248188 |
| chr10 | 126370904 | 126373322 |
| chr10 | 126407739 | 126409463 |
| chr10 | 126477921 | 126479713 |
| chr10 | 126499999 | 126502143 |
| chr10 | 126557377 | 126558560 |
| chr10 | 126601621 | 126604487 |
| chr10 | 126631903 | 126633205 |

|       |           |           |
|-------|-----------|-----------|
| chr10 | 126699020 | 126700462 |
| chr10 | 126702372 | 126704381 |
| chr10 | 126726254 | 126728731 |
| chr10 | 126748196 | 126749239 |
| chr10 | 126758700 | 126760694 |
| chr10 | 127113596 | 127114955 |
| chr10 | 127186281 | 127188218 |
| chr10 | 127451482 | 127452982 |
| chr10 | 127471733 | 127473893 |
| chr10 | 127495000 | 127497207 |
| chr10 | 127519816 | 127521433 |
| chr10 | 127533127 | 127535285 |
| chr10 | 127641096 | 127642781 |
| chr10 | 127647381 | 127649362 |
| chr10 | 127847911 | 127849754 |
| chr10 | 127910976 | 127912749 |
| chr10 | 127929568 | 127932093 |
| chr10 | 127983801 | 127987084 |
| chr10 | 128001597 | 128003840 |
| chr10 | 128062461 | 128064385 |
| chr10 | 128184322 | 128186125 |
| chr10 | 128257959 | 128259815 |
| chr10 | 128626321 | 128626921 |
| chr10 | 128850003 | 128850693 |
| chr10 | 129030487 | 129031345 |
| chr11 | 3023095   | 3024291   |
| chr11 | 3165346   | 3167089   |
| chr11 | 3188116   | 3195283   |
| chr11 | 3268715   | 3272560   |
| chr11 | 3434763   | 3436648   |
| chr11 | 3547653   | 3550172   |
| chr11 | 3717909   | 3719555   |
| chr11 | 3897139   | 3899881   |
| chr11 | 3993428   | 3998317   |
| chr11 | 4022300   | 4024501   |
| chr11 | 4059288   | 4061576   |
| chr11 | 4086274   | 4088054   |
| chr11 | 4360545   | 4361886   |
| chr11 | 4493830   | 4495177   |
| chr11 | 4603288   | 4605648   |
| chr11 | 4772934   | 4775254   |
| chr11 | 4846142   | 4848938   |
| chr11 | 4957148   | 4960387   |

|       |          |          |
|-------|----------|----------|
| chr11 | 4963223  | 4966040  |
| chr11 | 4997688  | 5001260  |
| chr11 | 5394843  | 5397320  |
| chr11 | 5415837  | 5417240  |
| chr11 | 5441093  | 5442801  |
| chr11 | 5606815  | 5608221  |
| chr11 | 5614736  | 5618879  |
| chr11 | 5661601  | 5662755  |
| chr11 | 5687297  | 5689784  |
| chr11 | 5796185  | 5799737  |
| chr11 | 5800825  | 5803329  |
| chr11 | 5854950  | 5857971  |
| chr11 | 5964280  | 5966867  |
| chr11 | 6098967  | 6101285  |
| chr11 | 6166743  | 6168329  |
| chr11 | 6173938  | 6176034  |
| chr11 | 6190997  | 6193268  |
| chr11 | 6314540  | 6317461  |
| chr11 | 6388904  | 6390978  |
| chr11 | 6392948  | 6395039  |
| chr11 | 6427525  | 6429701  |
| chr11 | 6445909  | 6447559  |
| chr11 | 6524936  | 6527160  |
| chr11 | 7112487  | 7114902  |
| chr11 | 7610804  | 7611592  |
| chr11 | 7894643  | 7895414  |
| chr11 | 8468268  | 8470880  |
| chr11 | 8504674  | 8506294  |
| chr11 | 8534076  | 8536431  |
| chr11 | 8558381  | 8559972  |
| chr11 | 8910135  | 8911653  |
| chr11 | 11047693 | 11048618 |
| chr11 | 11186890 | 11188346 |
| chr11 | 11391494 | 11392635 |
| chr11 | 11708291 | 11710543 |
| chr11 | 12192408 | 12193419 |
| chr11 | 13042557 | 13043491 |
| chr11 | 13215854 | 13217067 |
| chr11 | 13278809 | 13279493 |
| chr11 | 13514395 | 13515635 |
| chr11 | 14066648 | 14067420 |
| chr11 | 14792366 | 14793033 |
| chr11 | 16157031 | 16158675 |

|       |          |          |
|-------|----------|----------|
| chr11 | 16979257 | 16980701 |
| chr11 | 17156814 | 17158320 |
| chr11 | 17853017 | 17854938 |
| chr11 | 18913486 | 18916983 |
| chr11 | 18982326 | 18982977 |
| chr11 | 19470915 | 19472321 |
| chr11 | 19715640 | 19717227 |
| chr11 | 19823579 | 19827225 |
| chr11 | 20037679 | 20041456 |
| chr11 | 20099962 | 20102764 |
| chr11 | 20148396 | 20150303 |
| chr11 | 20377075 | 20378308 |
| chr11 | 20431656 | 20432387 |
| chr11 | 20531058 | 20532916 |
| chr11 | 20547210 | 20549106 |
| chr11 | 20555318 | 20557636 |
| chr11 | 20640339 | 20642230 |
| chr11 | 20729811 | 20731923 |
| chr11 | 21068532 | 21069693 |
| chr11 | 21137778 | 21138980 |
| chr11 | 21269661 | 21271561 |
| chr11 | 21380254 | 21380931 |
| chr11 | 21533644 | 21534910 |
| chr11 | 21895526 | 21898884 |
| chr11 | 22099795 | 22101322 |
| chr11 | 22412065 | 22413693 |
| chr11 | 22528657 | 22530878 |
| chr11 | 22609945 | 22611939 |
| chr11 | 22698703 | 22700925 |
| chr11 | 22871497 | 22873873 |
| chr11 | 22881073 | 22882791 |
| chr11 | 22890025 | 22892067 |
| chr11 | 22906912 | 22909293 |
| chr11 | 23154951 | 23157137 |
| chr11 | 23204920 | 23207343 |
| chr11 | 23396588 | 23398644 |
| chr11 | 23565173 | 23566932 |
| chr11 | 23794290 | 23795684 |
| chr11 | 24062913 | 24065315 |
| chr11 | 24711544 | 24712707 |
| chr11 | 25762521 | 25763242 |
| chr11 | 26109398 | 26111276 |
| chr11 | 26286658 | 26287739 |

|       |          |          |
|-------|----------|----------|
| chr11 | 26326205 | 26326906 |
| chr11 | 26568650 | 26569721 |
| chr11 | 28264541 | 28266278 |
| chr11 | 28930443 | 28931006 |
| chr11 | 29030293 | 29031868 |
| chr11 | 29071672 | 29074335 |
| chr11 | 29146677 | 29148577 |
| chr11 | 29273086 | 29274797 |
| chr11 | 29338524 | 29339102 |
| chr11 | 29413921 | 29415912 |
| chr11 | 29425799 | 29427021 |
| chr11 | 29447135 | 29448915 |
| chr11 | 29535908 | 29537841 |
| chr11 | 30097083 | 30099567 |
| chr11 | 30166638 | 30168149 |
| chr11 | 30548845 | 30549837 |
| chr11 | 30784582 | 30785959 |
| chr11 | 30934885 | 30936080 |
| chr11 | 31268128 | 31271652 |
| chr11 | 31571261 | 31572553 |
| chr11 | 31769488 | 31771707 |
| chr11 | 31864990 | 31867014 |
| chr11 | 32104416 | 32106285 |
| chr11 | 32166774 | 32168469 |
| chr11 | 33061820 | 33064607 |
| chr11 | 33100484 | 33105072 |
| chr11 | 33121491 | 33122932 |
| chr11 | 33412325 | 33414499 |
| chr11 | 33436525 | 33438735 |
| chr11 | 34662697 | 34663840 |
| chr11 | 35200074 | 35202167 |
| chr11 | 35204807 | 35206358 |
| chr11 | 35610462 | 35612454 |
| chr11 | 35859837 | 35861993 |
| chr11 | 36991880 | 36992919 |
| chr11 | 37541991 | 37543860 |
| chr11 | 37565600 | 37566333 |
| chr11 | 40505392 | 40506540 |
| chr11 | 42002268 | 42003578 |
| chr11 | 42497199 | 42497886 |
| chr11 | 43116915 | 43117810 |
| chr11 | 43430030 | 43432383 |
| chr11 | 43494858 | 43496730 |

|       |          |          |
|-------|----------|----------|
| chr11 | 43560631 | 43561981 |
| chr11 | 44119414 | 44119971 |
| chr11 | 44158803 | 44159751 |
| chr11 | 44331253 | 44334393 |
| chr11 | 44675975 | 44678504 |
| chr11 | 45582297 | 45583432 |
| chr11 | 45757005 | 45759538 |
| chr11 | 45768221 | 45769391 |
| chr11 | 45792627 | 45795043 |
| chr11 | 45868501 | 45870291 |
| chr11 | 45978690 | 45980485 |
| chr11 | 46466171 | 46466960 |
| chr11 | 47801186 | 47803138 |
| chr11 | 48135338 | 48136174 |
| chr11 | 48265150 | 48265741 |
| chr11 | 48535747 | 48536832 |
| chr11 | 48628981 | 48631340 |
| chr11 | 48649810 | 48652825 |
| chr11 | 49016106 | 49018105 |
| chr11 | 49525358 | 49528698 |
| chr11 | 49619591 | 49620326 |
| chr11 | 49659033 | 49661198 |
| chr11 | 49987630 | 49989447 |
| chr11 | 50037641 | 50040800 |
| chr11 | 50045083 | 50048710 |
| chr11 | 50104211 | 50106569 |
| chr11 | 50138389 | 50139936 |
| chr11 | 50182715 | 50186025 |
| chr11 | 50189866 | 50192566 |
| chr11 | 50243493 | 50245601 |
| chr11 | 50570660 | 50572423 |
| chr11 | 50728954 | 50730027 |
| chr11 | 50730364 | 50732354 |
| chr11 | 50744270 | 50745565 |
| chr11 | 51075923 | 51078167 |
| chr11 | 51397138 | 51399479 |
| chr11 | 51500963 | 51503737 |
| chr11 | 51576319 | 51578106 |
| chr11 | 51678969 | 51680496 |
| chr11 | 51709883 | 51711386 |
| chr11 | 51780089 | 51782018 |
| chr11 | 51812781 | 51815153 |
| chr11 | 51910833 | 51914074 |

|       |          |          |
|-------|----------|----------|
| chr11 | 52151683 | 52155603 |
| chr11 | 52157466 | 52160976 |
| chr11 | 52172117 | 52176124 |
| chr11 | 52208896 | 52211233 |
| chr11 | 53112592 | 53115751 |
| chr11 | 53137033 | 53138975 |
| chr11 | 53163788 | 53165965 |
| chr11 | 53269661 | 53272057 |
| chr11 | 53290822 | 53294550 |
| chr11 | 53331241 | 53335103 |
| chr11 | 53355445 | 53357139 |
| chr11 | 53607217 | 53611283 |
| chr11 | 53704501 | 53706009 |
| chr11 | 53792743 | 53794463 |
| chr11 | 54201664 | 54202643 |
| chr11 | 54600325 | 54602138 |
| chr11 | 54609598 | 54610779 |
| chr11 | 54657937 | 54659729 |
| chr11 | 54672938 | 54674834 |
| chr11 | 54679310 | 54681093 |
| chr11 | 54970581 | 54973628 |
| chr11 | 55017418 | 55018736 |
| chr11 | 55200943 | 55202215 |
| chr11 | 55281479 | 55284371 |
| chr11 | 56213569 | 56214181 |
| chr11 | 56536075 | 56537964 |
| chr11 | 56544910 | 56546221 |
| chr11 | 56620483 | 56621551 |
| chr11 | 57331333 | 57332704 |
| chr11 | 57531865 | 57534148 |
| chr11 | 57613607 | 57615168 |
| chr11 | 57679583 | 57681622 |
| chr11 | 57731843 | 57733343 |
| chr11 | 57747392 | 57748955 |
| chr11 | 57822811 | 57824395 |
| chr11 | 57984369 | 57985830 |
| chr11 | 58027339 | 58028953 |
| chr11 | 58115171 | 58116815 |
| chr11 | 58119942 | 58121959 |
| chr11 | 58129202 | 58131207 |
| chr11 | 58142610 | 58145165 |
| chr11 | 58590977 | 58592688 |
| chr11 | 58679646 | 58682067 |

|       |          |          |
|-------|----------|----------|
| chr11 | 58716496 | 58718716 |
| chr11 | 58790285 | 58793002 |
| chr11 | 58889460 | 58891546 |
| chr11 | 58976223 | 58978217 |
| chr11 | 59004421 | 59005769 |
| chr11 | 59020986 | 59023322 |
| chr11 | 59040417 | 59042803 |
| chr11 | 59096767 | 59098920 |
| chr11 | 59187383 | 59189608 |
| chr11 | 59284597 | 59286264 |
| chr11 | 59318529 | 59321008 |
| chr11 | 59384076 | 59386070 |
| chr11 | 59426368 | 59428090 |
| chr11 | 59599709 | 59601652 |
| chr11 | 59621929 | 59624301 |
| chr11 | 59652121 | 59654373 |
| chr11 | 59659026 | 59660357 |
| chr11 | 59721365 | 59722924 |
| chr11 | 59760714 | 59762655 |
| chr11 | 59858914 | 59860420 |
| chr11 | 59918963 | 59920894 |
| chr11 | 59926978 | 59929598 |
| chr11 | 59952292 | 59955025 |
| chr11 | 59988496 | 59991745 |
| chr11 | 59998365 | 60005504 |
| chr11 | 60044857 | 60047334 |
| chr11 | 60229923 | 60232478 |
| chr11 | 60289142 | 60294204 |
| chr11 | 60349747 | 60353622 |
| chr11 | 60511841 | 60513782 |
| chr11 | 60589567 | 60592225 |
| chr11 | 60691213 | 60693604 |
| chr11 | 60726071 | 60727835 |
| chr11 | 60777490 | 60778684 |
| chr11 | 60987322 | 60989575 |
| chr11 | 61149999 | 61151754 |
| chr11 | 61220834 | 61222494 |
| chr11 | 61262210 | 61264241 |
| chr11 | 61317503 | 61319801 |
| chr11 | 61356909 | 61358079 |
| chr11 | 61392067 | 61394265 |
| chr11 | 61397231 | 61399211 |
| chr11 | 61486297 | 61490661 |



|       |          |          |
|-------|----------|----------|
| chr11 | 61575084 | 61576327 |
| chr11 | 61667326 | 61669652 |
| chr11 | 61742989 | 61744721 |
| chr11 | 61863069 | 61864779 |
| chr11 | 62093650 | 62095827 |
| chr11 | 62269801 | 62272725 |
| chr11 | 62362956 | 62366030 |
| chr11 | 62415375 | 62420731 |
| chr11 | 62544092 | 62545839 |
| chr11 | 62607170 | 62608429 |
| chr11 | 62692690 | 62693631 |
| chr11 | 62752715 | 62754689 |
| chr11 | 63459569 | 63460799 |
| chr11 | 63891723 | 63893699 |
| chr11 | 63902577 | 63903709 |
| chr11 | 64111750 | 64113028 |
| chr11 | 64281427 | 64282777 |
| chr11 | 65526199 | 65527574 |
| chr11 | 65600249 | 65602610 |
| chr11 | 66273332 | 66274654 |
| chr11 | 66838018 | 66839590 |
| chr11 | 66865676 | 66866795 |
| chr11 | 66893679 | 66895226 |
| chr11 | 66912333 | 66915306 |
| chr11 | 67007427 | 67008957 |
| chr11 | 67072023 | 67073140 |
| chr11 | 67177312 | 67178923 |
| chr11 | 67779068 | 67781021 |
| chr11 | 68197850 | 68200361 |
| chr11 | 68204030 | 68205706 |
| chr11 | 68216982 | 68218784 |
| chr11 | 68344120 | 68348002 |
| chr11 | 68406928 | 68408790 |
| chr11 | 68504534 | 68506835 |
| chr11 | 68665702 | 68667718 |
| chr11 | 68714235 | 68715749 |
| chr11 | 68785874 | 68788064 |
| chr11 | 68800749 | 68802461 |
| chr11 | 68828563 | 68830885 |
| chr11 | 68848713 | 68850620 |
| chr11 | 68858794 | 68860319 |
| chr11 | 68883388 | 68885289 |
| chr11 | 68901357 | 68903753 |

|       |          |          |
|-------|----------|----------|
| chr11 | 69230451 | 69234222 |
| chr11 | 69315397 | 69316621 |
| chr11 | 69359244 | 69362184 |
| chr11 | 69372126 | 69378462 |
| chr11 | 69391803 | 69396168 |
| chr11 | 69397912 | 69400589 |
| chr11 | 69412508 | 69414503 |
| chr11 | 69445281 | 69447219 |
| chr11 | 69475249 | 69477660 |
| chr11 | 69483953 | 69487084 |
| chr11 | 69571285 | 69574773 |
| chr11 | 69578906 | 69581097 |
| chr11 | 69587948 | 69591141 |
| chr11 | 69646566 | 69648047 |
| chr11 | 69689589 | 69696242 |
| chr11 | 69713774 | 69716450 |
| chr11 | 69793154 | 69795169 |
| chr11 | 69808003 | 69810802 |
| chr11 | 69909857 | 69912339 |
| chr11 | 70039329 | 70041088 |
| chr11 | 70046827 | 70048816 |
| chr11 | 70152065 | 70153551 |
| chr11 | 70221322 | 70224642 |
| chr11 | 70337840 | 70341123 |
| chr11 | 70352570 | 70354831 |
| chr11 | 70375530 | 70377480 |
| chr11 | 70459333 | 70462277 |
| chr11 | 70466864 | 70470840 |
| chr11 | 70481517 | 70484477 |
| chr11 | 70500145 | 70502203 |
| chr11 | 70782669 | 70784772 |
| chr11 | 70831996 | 70834114 |
| chr11 | 71907070 | 71909712 |
| chr11 | 72027886 | 72030078 |
| chr11 | 72095937 | 72097772 |
| chr11 | 72254359 | 72256137 |
| chr11 | 72419433 | 72422410 |
| chr11 | 72502563 | 72504529 |
| chr11 | 72608127 | 72610592 |
| chr11 | 72773701 | 72775842 |
| chr11 | 72860427 | 72862584 |
| chr11 | 72989351 | 72991671 |
| chr11 | 73142111 | 73143979 |

|       |          |          |
|-------|----------|----------|
| chr11 | 73282656 | 73283550 |
| chr11 | 74450579 | 74453015 |
| chr11 | 74536450 | 74538437 |
| chr11 | 74582967 | 74585615 |
| chr11 | 74642660 | 74646935 |
| chr11 | 74709633 | 74712312 |
| chr11 | 74738720 | 74740065 |
| chr11 | 74991073 | 74993400 |
| chr11 | 75002929 | 75005170 |
| chr11 | 75063151 | 75066595 |
| chr11 | 75104799 | 75107033 |
| chr11 | 75160706 | 75162714 |
| chr11 | 75299940 | 75301608 |
| chr11 | 75333054 | 75334730 |
| chr11 | 75370441 | 75372086 |
| chr11 | 75443392 | 75445395 |
| chr11 | 75491774 | 75494310 |
| chr11 | 75545323 | 75547889 |
| chr11 | 75992114 | 75993940 |
| chr11 | 76014802 | 76016446 |
| chr11 | 76030039 | 76032231 |
| chr11 | 76056195 | 76057947 |
| chr11 | 76132405 | 76134887 |
| chr11 | 76220075 | 76221297 |
| chr11 | 76305849 | 76309054 |
| chr11 | 76434965 | 76439329 |
| chr11 | 76576141 | 76578031 |
| chr11 | 76659348 | 76660872 |
| chr11 | 76758607 | 76760275 |
| chr11 | 76891000 | 76892501 |
| chr11 | 77283990 | 77287166 |
| chr11 | 77310253 | 77312677 |
| chr11 | 77419859 | 77422239 |
| chr11 | 77443099 | 77444613 |
| chr11 | 77499067 | 77501728 |
| chr11 | 77579310 | 77580892 |
| chr11 | 77606103 | 77607765 |
| chr11 | 77672330 | 77674379 |
| chr11 | 77794290 | 77799471 |
| chr11 | 77893219 | 77894705 |
| chr11 | 77907630 | 77909422 |
| chr11 | 77975295 | 77980013 |
| chr11 | 77995971 | 77997962 |

|       |          |          |
|-------|----------|----------|
| chr11 | 78058471 | 78060381 |
| chr11 | 78074535 | 78076093 |
| chr11 | 78141484 | 78143073 |
| chr11 | 78209935 | 78211799 |
| chr11 | 78324936 | 78326515 |
| chr11 | 78363277 | 78365832 |
| chr11 | 78508856 | 78510678 |
| chr11 | 78564243 | 78565539 |
| chr11 | 78709829 | 78711558 |
| chr11 | 78832161 | 78835595 |
| chr11 | 79066551 | 79068901 |
| chr11 | 79152209 | 79153824 |
| chr11 | 79417872 | 79420378 |
| chr11 | 79449235 | 79450625 |
| chr11 | 79517050 | 79519318 |
| chr11 | 79709969 | 79711640 |
| chr11 | 79893628 | 79895704 |
| chr11 | 79902463 | 79903716 |
| chr11 | 79954713 | 79956445 |
| chr11 | 79991094 | 79992809 |
| chr11 | 79996849 | 79998363 |
| chr11 | 80195751 | 80198013 |
| chr11 | 80241570 | 80243601 |
| chr11 | 80592323 | 80594106 |
| chr11 | 80964641 | 80967304 |
| chr11 | 81385971 | 81387205 |
| chr11 | 82199672 | 82203638 |
| chr11 | 82419683 | 82421205 |
| chr11 | 82503278 | 82505501 |
| chr11 | 82576687 | 82578955 |
| chr11 | 82721014 | 82722432 |
| chr11 | 83104748 | 83106153 |
| chr11 | 83115461 | 83116987 |
| chr11 | 83285639 | 83288048 |
| chr11 | 83395484 | 83397462 |
| chr11 | 83566572 | 83568015 |
| chr11 | 83612800 | 83614913 |
| chr11 | 83754791 | 83756266 |
| chr11 | 83777432 | 83778507 |
| chr11 | 83992265 | 83994182 |
| chr11 | 84631484 | 84633490 |
| chr11 | 84682300 | 84685079 |
| chr11 | 84727798 | 84730839 |

|       |          |          |
|-------|----------|----------|
| chr11 | 84952250 | 84954437 |
| chr11 | 85047127 | 85049250 |
| chr11 | 85673410 | 85674907 |
| chr11 | 86070529 | 86071712 |
| chr11 | 86170737 | 86172661 |
| chr11 | 86357372 | 86359287 |
| chr11 | 86569556 | 86572146 |
| chr11 | 86899111 | 86900710 |
| chr11 | 86921899 | 86923949 |
| chr11 | 86939856 | 86941363 |
| chr11 | 87261405 | 87262811 |
| chr11 | 87560776 | 87563994 |
| chr11 | 87568773 | 87571272 |
| chr11 | 87666244 | 87667525 |
| chr11 | 87860059 | 87862314 |
| chr11 | 87880824 | 87881589 |
| chr11 | 87990398 | 87991885 |
| chr11 | 88016968 | 88018891 |
| chr11 | 88120384 | 88122566 |
| chr11 | 88702823 | 88705000 |
| chr11 | 88724393 | 88726745 |
| chr11 | 88823458 | 88824553 |
| chr11 | 88834818 | 88836634 |
| chr11 | 88860012 | 88862165 |
| chr11 | 88889495 | 88891155 |
| chr11 | 88921003 | 88922676 |
| chr11 | 88928502 | 88930598 |
| chr11 | 89698171 | 89698935 |
| chr11 | 90498880 | 90500494 |
| chr11 | 90548012 | 90549485 |
| chr11 | 93189618 | 93190660 |
| chr11 | 93332729 | 93333743 |
| chr11 | 93828427 | 93830716 |
| chr11 | 94071484 | 94073664 |
| chr11 | 94182229 | 94184298 |
| chr11 | 94382219 | 94383453 |
| chr11 | 94409091 | 94411278 |
| chr11 | 94514297 | 94515689 |
| chr11 | 94537539 | 94539866 |
| chr11 | 94810720 | 94813074 |
| chr11 | 94818527 | 94820339 |
| chr11 | 94852277 | 94854904 |
| chr11 | 94967664 | 94970574 |

|       |          |          |
|-------|----------|----------|
| chr11 | 94975860 | 94977377 |
| chr11 | 95089893 | 95091783 |
| chr11 | 95170408 | 95172995 |
| chr11 | 95197860 | 95199822 |
| chr11 | 95245427 | 95246698 |
| chr11 | 95393363 | 95395686 |
| chr11 | 95444632 | 95449573 |
| chr11 | 95656934 | 95658952 |
| chr11 | 95842471 | 95845942 |
| chr11 | 95865451 | 95867394 |
| chr11 | 95895474 | 95896857 |
| chr11 | 95925592 | 95927278 |
| chr11 | 95934756 | 95938264 |
| chr11 | 95991107 | 95993290 |
| chr11 | 96050987 | 96052316 |
| chr11 | 96111767 | 96114435 |
| chr11 | 96147641 | 96149492 |
| chr11 | 96163589 | 96166298 |
| chr11 | 96213190 | 96216769 |
| chr11 | 96308610 | 96310055 |
| chr11 | 96387077 | 96388748 |
| chr11 | 96552304 | 96554585 |
| chr11 | 96573351 | 96575493 |
| chr11 | 96648044 | 96648996 |
| chr11 | 96679057 | 96681876 |
| chr11 | 96690333 | 96692563 |
| chr11 | 96753068 | 96755392 |
| chr11 | 96838225 | 96844496 |
| chr11 | 96902402 | 96904042 |
| chr11 | 96926290 | 96929107 |
| chr11 | 97047740 | 97048751 |
| chr11 | 97176625 | 97177690 |
| chr11 | 97196879 | 97201031 |
| chr11 | 97288529 | 97290683 |
| chr11 | 97394961 | 97399447 |
| chr11 | 97459282 | 97461383 |
| chr11 | 97488560 | 97492223 |
| chr11 | 97516643 | 97518878 |
| chr11 | 97521726 | 97524466 |
| chr11 | 97550496 | 97554983 |
| chr11 | 97558758 | 97562792 |
| chr11 | 97604844 | 97607407 |
| chr11 | 97642398 | 97644265 |

|       |           |           |
|-------|-----------|-----------|
| chr11 | 97673585  | 97675786  |
| chr11 | 97744185  | 97746567  |
| chr11 | 97764483  | 97765948  |
| chr11 | 97814331  | 97816264  |
| chr11 | 97842473  | 97846322  |
| chr11 | 97848123  | 97850381  |
| chr11 | 97882534  | 97885228  |
| chr11 | 97886831  | 97889522  |
| chr11 | 97927137  | 97929128  |
| chr11 | 98009781  | 98012183  |
| chr11 | 98053826  | 98055381  |
| chr11 | 98155358  | 98160362  |
| chr11 | 98193823  | 98198757  |
| chr11 | 98317792  | 98319999  |
| chr11 | 98543047  | 98544806  |
| chr11 | 98589409  | 98591584  |
| chr11 | 98623334  | 98626596  |
| chr11 | 98654914  | 98659350  |
| chr11 | 98670327  | 98672262  |
| chr11 | 98723637  | 98725936  |
| chr11 | 98797054  | 98800440  |
| chr11 | 98823330  | 98826637  |
| chr11 | 98884325  | 98886504  |
| chr11 | 99090766  | 99093458  |
| chr11 | 99195493  | 99197330  |
| chr11 | 99883568  | 99885109  |
| chr11 | 100005775 | 100008002 |
| chr11 | 100125166 | 100127936 |
| chr11 | 100180062 | 100182642 |
| chr11 | 100216178 | 100219195 |
| chr11 | 100236349 | 100238713 |
| chr11 | 100301442 | 100303225 |
| chr11 | 100332787 | 100334750 |
| chr11 | 100480074 | 100482253 |
| chr11 | 100500504 | 100502920 |
| chr11 | 100507183 | 100508367 |
| chr11 | 100572687 | 100576440 |
| chr11 | 100642519 | 100645274 |
| chr11 | 100710991 | 100713017 |
| chr11 | 100740229 | 100742842 |
| chr11 | 100830366 | 100832991 |
| chr11 | 100869613 | 100871916 |
| chr11 | 100930368 | 100932831 |

|       |           |           |
|-------|-----------|-----------|
| chr11 | 101034336 | 101036437 |
| chr11 | 101139028 | 101141571 |
| chr11 | 101194669 | 101196470 |
| chr11 | 101209585 | 101211351 |
| chr11 | 101277620 | 101279620 |
| chr11 | 101284969 | 101287727 |
| chr11 | 101298196 | 101298950 |
| chr11 | 101303191 | 101305037 |
| chr11 | 101325182 | 101328210 |
| chr11 | 101412474 | 101415301 |
| chr11 | 101632436 | 101634995 |
| chr11 | 101645860 | 101649286 |
| chr11 | 101787665 | 101790346 |
| chr11 | 101845298 | 101846764 |
| chr11 | 102016394 | 102018793 |
| chr11 | 102045521 | 102046995 |
| chr11 | 102090054 | 102092331 |
| chr11 | 102109275 | 102111240 |
| chr11 | 102136969 | 102138816 |
| chr11 | 102169869 | 102173008 |
| chr11 | 102176471 | 102179153 |
| chr11 | 102266995 | 102270819 |
| chr11 | 102297964 | 102300839 |
| chr11 | 102416631 | 102418063 |
| chr11 | 102434132 | 102435649 |
| chr11 | 102465262 | 102467890 |
| chr11 | 102558005 | 102559925 |
| chr11 | 102637130 | 102641959 |
| chr11 | 102785699 | 102787143 |
| chr11 | 102809012 | 102811029 |
| chr11 | 102889201 | 102890887 |
| chr11 | 102975116 | 102979584 |
| chr11 | 102992924 | 102996324 |
| chr11 | 103019666 | 103021220 |
| chr11 | 103192866 | 103196118 |
| chr11 | 103221208 | 103225592 |
| chr11 | 103310270 | 103311699 |
| chr11 | 103558412 | 103560187 |
| chr11 | 103814374 | 103816349 |
| chr11 | 103826940 | 103828946 |
| chr11 | 103850388 | 103852429 |
| chr11 | 103873781 | 103875616 |
| chr11 | 104018834 | 104020831 |



|       |           |           |
|-------|-----------|-----------|
| chr11 | 104091586 | 104094713 |
| chr11 | 104301946 | 104305266 |
| chr11 | 104535989 | 104536734 |
| chr11 | 104542571 | 104543430 |
| chr11 | 104987651 | 104988697 |
| chr11 | 105011361 | 105013541 |
| chr11 | 105025771 | 105027985 |
| chr11 | 105041300 | 105044193 |
| chr11 | 105152831 | 105154932 |
| chr11 | 105804471 | 105806729 |
| chr11 | 105813041 | 105815367 |
| chr11 | 105828653 | 105830940 |
| chr11 | 105848910 | 105851110 |
| chr11 | 105880686 | 105882978 |
| chr11 | 106021509 | 106022870 |
| chr11 | 106076709 | 106078893 |
| chr11 | 106116154 | 106118393 |
| chr11 | 106648193 | 106651626 |
| chr11 | 106991960 | 106992954 |
| chr11 | 107049873 | 107051232 |
| chr11 | 107340474 | 107341959 |
| chr11 | 107396128 | 107397320 |
| chr11 | 107407200 | 107410303 |
| chr11 | 108100071 | 108103046 |
| chr11 | 108285316 | 108287660 |
| chr11 | 108495336 | 108496301 |
| chr11 | 109222581 | 109225183 |
| chr11 | 109511367 | 109513418 |
| chr11 | 110198121 | 110199620 |
| chr11 | 110267549 | 110268937 |
| chr11 | 112671804 | 112673663 |
| chr11 | 112687393 | 112688904 |
| chr11 | 112981726 | 112983718 |
| chr11 | 113152010 | 113154329 |
| chr11 | 113426144 | 113427562 |
| chr11 | 113509399 | 113511993 |
| chr11 | 113544042 | 113546895 |
| chr11 | 113569452 | 113572869 |
| chr11 | 113653254 | 113655248 |
| chr11 | 113728833 | 113731539 |
| chr11 | 113733832 | 113737611 |
| chr11 | 114054674 | 114056837 |
| chr11 | 114077695 | 114079694 |

|       |           |           |
|-------|-----------|-----------|
| chr11 | 114112133 | 114114131 |
| chr11 | 114332877 | 114335064 |
| chr11 | 114345434 | 114348279 |
| chr11 | 114402522 | 114403900 |
| chr11 | 114428417 | 114430348 |
| chr11 | 114502006 | 114504412 |
| chr11 | 114517240 | 114519567 |
| chr11 | 114649725 | 114654081 |
| chr11 | 114797190 | 114799362 |
| chr11 | 115063150 | 115064797 |
| chr11 | 115157599 | 115159629 |
| chr11 | 115182503 | 115186106 |
| chr11 | 115253842 | 115256374 |
| chr11 | 115264539 | 115265951 |
| chr11 | 115280305 | 115282285 |
| chr11 | 115308299 | 115310489 |
| chr11 | 115316463 | 115319155 |
| chr11 | 115351648 | 115354091 |
| chr11 | 115373470 | 115376112 |
| chr11 | 115396339 | 115398701 |
| chr11 | 115425128 | 115426703 |
| chr11 | 115463856 | 115466436 |
| chr11 | 115626269 | 115627867 |
| chr11 | 115674487 | 115677192 |
| chr11 | 115691620 | 115695076 |
| chr11 | 115718728 | 115721888 |
| chr11 | 115740426 | 115742719 |
| chr11 | 115743780 | 115748909 |
| chr11 | 115793902 | 115795965 |
| chr11 | 115848788 | 115852959 |
| chr11 | 115884462 | 115886255 |
| chr11 | 115947603 | 115949583 |
| chr11 | 115966536 | 115972528 |
| chr11 | 115990895 | 115993318 |
| chr11 | 115999179 | 116000890 |
| chr11 | 116080262 | 116085824 |
| chr11 | 116134252 | 116136361 |
| chr11 | 116166769 | 116169343 |
| chr11 | 116189781 | 116197299 |
| chr11 | 116295071 | 116296925 |
| chr11 | 116350002 | 116352614 |
| chr11 | 116365083 | 116366715 |
| chr11 | 116441406 | 116443229 |

|       |           |           |
|-------|-----------|-----------|
| chr11 | 116464130 | 116468170 |
| chr11 | 116489221 | 116491364 |
| chr11 | 116532051 | 116534320 |
| chr11 | 116554846 | 116560275 |
| chr11 | 116565354 | 116568914 |
| chr11 | 116673813 | 116676264 |
| chr11 | 116687018 | 116690452 |
| chr11 | 116703551 | 116705643 |
| chr11 | 116712996 | 116716032 |
| chr11 | 116833798 | 116837442 |
| chr11 | 116878780 | 116880909 |
| chr11 | 116937332 | 116946092 |
| chr11 | 117016750 | 117018950 |
| chr11 | 117227465 | 117229547 |
| chr11 | 117233680 | 117236359 |
| chr11 | 117339180 | 117341533 |
| chr11 | 117450278 | 117451563 |
| chr11 | 117456102 | 117463221 |
| chr11 | 117488657 | 117490523 |
| chr11 | 117514802 | 117518382 |
| chr11 | 117620783 | 117622870 |
| chr11 | 117670087 | 117672394 |
| chr11 | 117709013 | 117711739 |
| chr11 | 117721119 | 117725762 |
| chr11 | 117782284 | 117785502 |
| chr11 | 117826226 | 117832140 |
| chr11 | 117847165 | 117849162 |
| chr11 | 117933421 | 117937796 |
| chr11 | 117957507 | 117961070 |
| chr11 | 117993618 | 117995500 |
| chr11 | 118001039 | 118003012 |
| chr11 | 118363450 | 118365817 |
| chr11 | 118412247 | 118414323 |
| chr11 | 118907514 | 118910094 |
| chr11 | 118915054 | 118921658 |
| chr11 | 119044591 | 119046585 |
| chr11 | 119084199 | 119085921 |
| chr11 | 119088925 | 119091219 |
| chr11 | 119100235 | 119102131 |
| chr11 | 119114314 | 119115770 |
| chr11 | 119128169 | 119131667 |
| chr11 | 119160460 | 119162749 |
| chr11 | 119216030 | 119217887 |

|       |           |           |
|-------|-----------|-----------|
| chr11 | 119351923 | 119353102 |
| chr11 | 119463874 | 119465291 |
| chr11 | 119774006 | 119776794 |
| chr11 | 119906638 | 119910784 |
| chr11 | 119957173 | 119961883 |
| chr11 | 120111275 | 120116890 |
| chr11 | 120132359 | 120134979 |
| chr11 | 120149704 | 120151627 |
| chr11 | 120207777 | 120213219 |
| chr11 | 120327589 | 120330155 |
| chr11 | 120409685 | 120412343 |
| chr11 | 120442178 | 120444356 |
| chr11 | 120458205 | 120460888 |
| chr11 | 120485051 | 120488350 |
| chr11 | 120533121 | 120535626 |
| chr11 | 120573165 | 120575972 |
| chr11 | 120643704 | 120646994 |
| chr11 | 120684113 | 120687112 |
| chr11 | 120711304 | 120715853 |
| chr11 | 120762346 | 120764829 |
| chr11 | 120809145 | 120813607 |
| chr11 | 120851292 | 120853649 |
| chr11 | 121097066 | 121099579 |
| chr11 | 121121464 | 121122972 |
| chr11 | 121214595 | 121216954 |
| chr11 | 121691151 | 121692692 |
| chr12 | 3171957   | 3172923   |
| chr12 | 3234784   | 3236200   |
| chr12 | 3309006   | 3310845   |
| chr12 | 3364104   | 3366963   |
| chr12 | 3426309   | 3427973   |
| chr12 | 3690496   | 3692281   |
| chr12 | 3791325   | 3793295   |
| chr12 | 3807824   | 3809304   |
| chr12 | 3870818   | 3872988   |
| chr12 | 3959107   | 3961078   |
| chr12 | 4233123   | 4234849   |
| chr12 | 4482394   | 4483663   |
| chr12 | 4599024   | 4600804   |
| chr12 | 4726187   | 4727844   |
| chr12 | 4774917   | 4776799   |
| chr12 | 4823753   | 4825132   |
| chr12 | 4913182   | 4915685   |

|       |          |          |
|-------|----------|----------|
| chr12 | 4923532  | 4925595  |
| chr12 | 7807952  | 7809053  |
| chr12 | 7866117  | 7867469  |
| chr12 | 7907471  | 7908995  |
| chr12 | 8130445  | 8131083  |
| chr12 | 8303823  | 8306012  |
| chr12 | 8504820  | 8507828  |
| chr12 | 8647446  | 8648386  |
| chr12 | 8680131  | 8681688  |
| chr12 | 10397268 | 10398503 |
| chr12 | 11155424 | 11157776 |
| chr12 | 11193607 | 11194730 |
| chr12 | 12113366 | 12114005 |
| chr12 | 12700237 | 12701775 |
| chr12 | 12909019 | 12910157 |
| chr12 | 12910768 | 12912438 |
| chr12 | 12918039 | 12919741 |
| chr12 | 13255488 | 13256331 |
| chr12 | 13275494 | 13276523 |
| chr12 | 13432336 | 13433201 |
| chr12 | 14004893 | 14006068 |
| chr12 | 15406021 | 15407023 |
| chr12 | 15807100 | 15808432 |
| chr12 | 16659829 | 16661281 |
| chr12 | 16817334 | 16819127 |
| chr12 | 17887821 | 17889364 |
| chr12 | 18141600 | 18143808 |
| chr12 | 19181159 | 19182316 |
| chr12 | 19366407 | 19367166 |
| chr12 | 20317547 | 20318504 |
| chr12 | 20925969 | 20927123 |
| chr12 | 21116743 | 21118423 |
| chr12 | 21378902 | 21380243 |
| chr12 | 21422440 | 21423979 |
| chr12 | 25381859 | 25383276 |
| chr12 | 25460513 | 25463051 |
| chr12 | 25515318 | 25517912 |
| chr12 | 25659237 | 25660955 |
| chr12 | 28025925 | 28029271 |
| chr12 | 29216601 | 29218022 |
| chr12 | 29319424 | 29321881 |
| chr12 | 29933128 | 29934262 |
| chr12 | 30052740 | 30054032 |

|       |          |          |
|-------|----------|----------|
| chr12 | 30622075 | 30624210 |
| chr12 | 30867814 | 30869042 |
| chr12 | 31675743 | 31676678 |
| chr12 | 31758172 | 31760143 |
| chr12 | 31919132 | 31920429 |
| chr12 | 32183339 | 32185519 |
| chr12 | 32304281 | 32305851 |
| chr12 | 32339181 | 32340315 |
| chr12 | 32633384 | 32636048 |
| chr12 | 32977382 | 32978235 |
| chr12 | 33063030 | 33064928 |
| chr12 | 33638366 | 33639943 |
| chr12 | 33692652 | 33694332 |
| chr12 | 33831563 | 33833788 |
| chr12 | 33987635 | 33988734 |
| chr12 | 34058127 | 34059311 |
| chr12 | 34114126 | 34115169 |
| chr12 | 34168520 | 34169167 |
| chr12 | 34751456 | 34752170 |
| chr12 | 35731324 | 35733235 |
| chr12 | 36022353 | 36023394 |
| chr12 | 36188177 | 36189778 |
| chr12 | 36402876 | 36403774 |
| chr12 | 36767824 | 36769611 |
| chr12 | 36882394 | 36885174 |
| chr12 | 37069254 | 37070056 |
| chr12 | 37099469 | 37100898 |
| chr12 | 37212381 | 37213131 |
| chr12 | 37887764 | 37888739 |
| chr12 | 38773725 | 38774581 |
| chr12 | 38801082 | 38801728 |
| chr12 | 39253715 | 39254351 |
| chr12 | 40948455 | 40950550 |
| chr12 | 41171739 | 41173912 |
| chr12 | 42104830 | 42106351 |
| chr12 | 43730622 | 43731220 |
| chr12 | 43846784 | 43847473 |
| chr12 | 44137275 | 44137988 |
| chr12 | 44275988 | 44276657 |
| chr12 | 44450388 | 44451208 |
| chr12 | 44831275 | 44831964 |
| chr12 | 45165042 | 45165681 |
| chr12 | 45583616 | 45584467 |

|       |          |          |
|-------|----------|----------|
| chr12 | 45896627 | 45897732 |
| chr12 | 46544107 | 46545442 |
| chr12 | 46564876 | 46565842 |
| chr12 | 47918507 | 47920127 |
| chr12 | 48686246 | 48686941 |
| chr12 | 49950185 | 49950700 |
| chr12 | 50157833 | 50159590 |
| chr12 | 50225462 | 50226434 |
| chr12 | 50351896 | 50353006 |
| chr12 | 50485300 | 50486867 |
| chr12 | 52478065 | 52479066 |
| chr12 | 52791569 | 52793585 |
| chr12 | 52950482 | 52951165 |
| chr12 | 53071719 | 53072808 |
| chr12 | 53106700 | 53108082 |
| chr12 | 53603964 | 53606410 |
| chr12 | 55167987 | 55170569 |
| chr12 | 55756486 | 55758283 |
| chr12 | 55796211 | 55797513 |
| chr12 | 55895885 | 55897167 |
| chr12 | 55963016 | 55964392 |
| chr12 | 55989722 | 55990713 |
| chr12 | 56402673 | 56404688 |
| chr12 | 56477572 | 56479511 |
| chr12 | 56733046 | 56733990 |
| chr12 | 56920863 | 56922501 |
| chr12 | 57446129 | 57447373 |
| chr12 | 57676625 | 57677627 |
| chr12 | 58330827 | 58332468 |
| chr12 | 58642930 | 58644924 |
| chr12 | 58676748 | 58677895 |
| chr12 | 59135682 | 59136299 |
| chr12 | 60111790 | 60113716 |
| chr12 | 60113983 | 60115220 |
| chr12 | 60161593 | 60162748 |
| chr12 | 60166994 | 60168900 |
| chr12 | 60231529 | 60233054 |
| chr12 | 60424979 | 60426027 |
| chr12 | 60938124 | 60939175 |
| chr12 | 62733683 | 62734367 |
| chr12 | 62806213 | 62807042 |
| chr12 | 64085328 | 64086396 |
| chr12 | 64148896 | 64149585 |

|       |          |          |
|-------|----------|----------|
| chr12 | 64494092 | 64495179 |
| chr12 | 64792232 | 64792935 |
| chr12 | 66065908 | 66067812 |
| chr12 | 66174302 | 66175893 |
| chr12 | 66176196 | 66177513 |
| chr12 | 66325692 | 66327373 |
| chr12 | 67015372 | 67016589 |
| chr12 | 67384849 | 67385935 |
| chr12 | 68321206 | 68324122 |
| chr12 | 69147842 | 69148376 |
| chr12 | 70259302 | 70260788 |
| chr12 | 70284200 | 70286769 |
| chr12 | 70297685 | 70299720 |
| chr12 | 70328140 | 70330149 |
| chr12 | 70396879 | 70398789 |
| chr12 | 70472221 | 70474570 |
| chr12 | 70674009 | 70674890 |
| chr12 | 70682904 | 70684974 |
| chr12 | 70993025 | 70995359 |
| chr12 | 71346855 | 71347855 |
| chr12 | 71553693 | 71554742 |
| chr12 | 72115197 | 72117534 |
| chr12 | 72417941 | 72420240 |
| chr12 | 72696675 | 72697893 |
| chr12 | 73134282 | 73135523 |
| chr12 | 73170247 | 73173021 |
| chr12 | 73336508 | 73338135 |
| chr12 | 73508368 | 73510571 |
| chr12 | 73846014 | 73847124 |
| chr12 | 73861041 | 73862578 |
| chr12 | 73935531 | 73936971 |
| chr12 | 74017870 | 74019487 |
| chr12 | 74145253 | 74148275 |
| chr12 | 74210921 | 74214781 |
| chr12 | 74467901 | 74469704 |
| chr12 | 74645687 | 74647962 |
| chr12 | 75008130 | 75009989 |
| chr12 | 75050187 | 75051158 |
| chr12 | 75729277 | 75729852 |
| chr12 | 75773405 | 75774974 |
| chr12 | 76026648 | 76027908 |
| chr12 | 76696059 | 76698122 |
| chr12 | 76835565 | 76836660 |



|       |          |          |
|-------|----------|----------|
| chr12 | 77116928 | 77118183 |
| chr12 | 77470279 | 77472538 |
| chr12 | 77477246 | 77479266 |
| chr12 | 77544886 | 77546473 |
| chr12 | 77633374 | 77635738 |
| chr12 | 77937530 | 77939334 |
| chr12 | 77976919 | 77978881 |
| chr12 | 78010925 | 78012634 |
| chr12 | 78045416 | 78047104 |
| chr12 | 78062193 | 78063741 |
| chr12 | 78490282 | 78491267 |
| chr12 | 78511900 | 78512715 |
| chr12 | 78653992 | 78655591 |
| chr12 | 78876171 | 78877319 |
| chr12 | 79156898 | 79158113 |
| chr12 | 79326113 | 79328852 |
| chr12 | 80189933 | 80191659 |
| chr12 | 80272416 | 80274079 |
| chr12 | 80396412 | 80398372 |
| chr12 | 80572020 | 80572544 |
| chr12 | 81232778 | 81234192 |
| chr12 | 81439784 | 81441460 |
| chr12 | 81563666 | 81564915 |
| chr12 | 81743520 | 81745985 |
| chr12 | 82046089 | 82048259 |
| chr12 | 82119169 | 82121085 |
| chr12 | 82125334 | 82126933 |
| chr12 | 82695541 | 82696483 |
| chr12 | 83202392 | 83204231 |
| chr12 | 83740927 | 83742005 |
| chr12 | 84972074 | 84973470 |
| chr12 | 85290970 | 85293300 |
| chr12 | 85328420 | 85329652 |
| chr12 | 85366301 | 85367264 |
| chr12 | 85441534 | 85443089 |
| chr12 | 85448439 | 85449419 |
| chr12 | 85513309 | 85518019 |
| chr12 | 85529100 | 85532687 |
| chr12 | 85532942 | 85535165 |
| chr12 | 85599126 | 85600343 |
| chr12 | 85702291 | 85703552 |
| chr12 | 85704943 | 85706437 |
| chr12 | 85748921 | 85750595 |

|       |          |          |
|-------|----------|----------|
| chr12 | 85758012 | 85759076 |
| chr12 | 85790890 | 85793246 |
| chr12 | 85981700 | 85983791 |
| chr12 | 85989036 | 85991056 |
| chr12 | 86068467 | 86070295 |
| chr12 | 86113352 | 86115014 |
| chr12 | 86216416 | 86218760 |
| chr12 | 86559640 | 86561382 |
| chr12 | 86679548 | 86681409 |
| chr12 | 86714753 | 86716413 |
| chr12 | 86912178 | 86914052 |
| chr12 | 86961149 | 86963187 |
| chr12 | 87735035 | 87737642 |
| chr12 | 87810244 | 87812371 |
| chr12 | 87830293 | 87832668 |
| chr12 | 88028275 | 88031048 |
| chr12 | 88066550 | 88068294 |
| chr12 | 88108588 | 88110475 |
| chr12 | 88177029 | 88178230 |
| chr12 | 88222744 | 88226096 |
| chr12 | 88258010 | 88260993 |
| chr12 | 88271621 | 88274661 |
| chr12 | 88286945 | 88289535 |
| chr12 | 88487806 | 88489341 |
| chr12 | 88564911 | 88566270 |
| chr12 | 88606683 | 88608876 |
| chr12 | 88639446 | 88641969 |
| chr12 | 88783266 | 88785766 |
| chr12 | 88812380 | 88814278 |
| chr12 | 90498232 | 90499089 |
| chr12 | 91320351 | 91321002 |
| chr12 | 91865029 | 91865786 |
| chr12 | 92079472 | 92080168 |
| chr12 | 92826551 | 92827733 |
| chr12 | 92828055 | 92829719 |
| chr12 | 96092931 | 96093582 |
| chr12 | 96486032 | 96486960 |
| chr12 | 96578283 | 96579094 |
| chr12 | 96823421 | 96824471 |
| chr12 | 97059698 | 97060633 |
| chr12 | 97748600 | 97749350 |
| chr12 | 98939684 | 98940537 |
| chr12 | 99496663 | 99498595 |

|       |           |           |
|-------|-----------|-----------|
| chr12 | 99972005  | 99973558  |
| chr12 | 100138355 | 100139799 |
| chr12 | 100631137 | 100632306 |
| chr12 | 100957233 | 100958708 |
| chr12 | 101122338 | 101123876 |
| chr12 | 101396736 | 101398414 |
| chr12 | 101418889 | 101419641 |
| chr12 | 101424831 | 101426649 |
| chr12 | 102320049 | 102322595 |
| chr12 | 103150579 | 103151948 |
| chr12 | 103195402 | 103196899 |
| chr12 | 103213033 | 103215471 |
| chr12 | 103520532 | 103521784 |
| chr12 | 103650363 | 103651848 |
| chr12 | 103994315 | 103997467 |
| chr12 | 104115518 | 104117218 |
| chr12 | 104297034 | 104298717 |
| chr12 | 104562715 | 104564353 |
| chr12 | 104877180 | 104878706 |
| chr12 | 105274517 | 105276455 |
| chr12 | 105757646 | 105760535 |
| chr12 | 105989259 | 105991169 |
| chr12 | 105998553 | 106000031 |
| chr12 | 106138919 | 106140660 |
| chr12 | 106169712 | 106171691 |
| chr12 | 106247097 | 106249220 |
| chr12 | 106705461 | 106707092 |
| chr12 | 106922348 | 106924355 |
| chr12 | 106972426 | 106973957 |
| chr12 | 107022300 | 107023763 |
| chr12 | 107378023 | 107379771 |
| chr12 | 107547635 | 107550190 |
| chr12 | 109017184 | 109018348 |
| chr12 | 109153205 | 109156255 |
| chr12 | 109416208 | 109417504 |
| chr12 | 109417508 | 109418737 |
| chr12 | 109515353 | 109517932 |
| chr12 | 109539029 | 109540962 |
| chr12 | 109576544 | 109578155 |
| chr12 | 109665708 | 109667216 |
| chr12 | 109811782 | 109812599 |
| chr12 | 109950098 | 109951482 |
| chr12 | 110030213 | 110033244 |

|       |           |           |
|-------|-----------|-----------|
| chr12 | 110132037 | 110133474 |
| chr12 | 110157148 | 110158567 |
| chr12 | 110776794 | 110778041 |
| chr12 | 110778716 | 110780381 |
| chr12 | 111186411 | 111188144 |
| chr12 | 111723271 | 111724981 |
| chr12 | 111838759 | 111840800 |
| chr12 | 111933309 | 111935664 |
| chr12 | 111939029 | 111941306 |
| chr12 | 111975550 | 111977300 |
| chr12 | 112077969 | 112080153 |
| chr12 | 112087462 | 112090435 |
| chr12 | 112229402 | 112231800 |
| chr12 | 112399905 | 112401309 |
| chr12 | 112402778 | 112404435 |
| chr12 | 112614858 | 112617336 |
| chr12 | 112722990 | 112724917 |
| chr12 | 112775615 | 112778255 |
| chr12 | 112811828 | 112813520 |
| chr12 | 112908022 | 112911411 |
| chr12 | 112950426 | 112952041 |
| chr12 | 112996021 | 112998356 |
| chr12 | 113552397 | 113553801 |
| chr12 | 113780518 | 113782749 |
| chr12 | 113950022 | 113950864 |
| chr12 | 114087930 | 114089363 |
| chr12 | 114214407 | 114216123 |
| chr12 | 114238114 | 114239502 |
| chr12 | 114377724 | 114379747 |
| chr12 | 114423386 | 114427944 |
| chr12 | 115344367 | 115345142 |
| chr12 | 117500838 | 117502094 |
| chr12 | 117518453 | 117520618 |
| chr12 | 117723633 | 117725375 |
| chr12 | 118411242 | 118412773 |
| chr12 | 118499790 | 118501063 |
| chr12 | 119026617 | 119028035 |
| chr12 | 119349042 | 119350045 |
| chr12 | 119420843 | 119422026 |
| chr12 | 119822312 | 119823322 |
| chr12 | 121144350 | 121145442 |
| chr13 | 3476943   | 3477966   |
| chr13 | 3536551   | 3538281   |

|       |          |          |
|-------|----------|----------|
| chr13 | 3609313  | 3610933  |
| chr13 | 3892402  | 3893174  |
| chr13 | 3908909  | 3910436  |
| chr13 | 3916610  | 3917885  |
| chr13 | 4281730  | 4282681  |
| chr13 | 5177352  | 5177931  |
| chr13 | 6434486  | 6435347  |
| chr13 | 6527349  | 6528478  |
| chr13 | 6646294  | 6648718  |
| chr13 | 6673498  | 6674690  |
| chr13 | 6777348  | 6778037  |
| chr13 | 6883712  | 6884648  |
| chr13 | 7129746  | 7130921  |
| chr13 | 8869386  | 8871250  |
| chr13 | 8994148  | 8995985  |
| chr13 | 9092908  | 9094341  |
| chr13 | 9275905  | 9277305  |
| chr13 | 10039610 | 10040247 |
| chr13 | 12432130 | 12433390 |
| chr13 | 12657649 | 12659334 |
| chr13 | 13958585 | 13960633 |
| chr13 | 13961817 | 13963041 |
| chr13 | 14046086 | 14047612 |
| chr13 | 14131404 | 14132292 |
| chr13 | 14155001 | 14156848 |
| chr13 | 14704348 | 14706284 |
| chr13 | 14722057 | 14723233 |
| chr13 | 14833799 | 14834578 |
| chr13 | 16483507 | 16484162 |
| chr13 | 16591118 | 16592085 |
| chr13 | 17031273 | 17032215 |
| chr13 | 18035112 | 18036890 |
| chr13 | 18489341 | 18490953 |
| chr13 | 18808722 | 18809608 |
| chr13 | 19039045 | 19041448 |
| chr13 | 19714303 | 19716198 |
| chr13 | 20108086 | 20109319 |
| chr13 | 20897955 | 20898580 |
| chr13 | 21263974 | 21265851 |
| chr13 | 21271397 | 21273483 |
| chr13 | 21421174 | 21422047 |
| chr13 | 21826907 | 21827559 |
| chr13 | 22097827 | 22099604 |

|       |          |          |
|-------|----------|----------|
| chr13 | 23398232 | 23399968 |
| chr13 | 23436530 | 23437949 |
| chr13 | 23537084 | 23538748 |
| chr13 | 23598176 | 23600025 |
| chr13 | 23621913 | 23623891 |
| chr13 | 23642384 | 23643875 |
| chr13 | 23676534 | 23677894 |
| chr13 | 23852054 | 23854440 |
| chr13 | 24024923 | 24026981 |
| chr13 | 24086490 | 24087716 |
| chr13 | 24119758 | 24120595 |
| chr13 | 24852474 | 24854769 |
| chr13 | 24891880 | 24894296 |
| chr13 | 24922924 | 24924205 |
| chr13 | 25202151 | 25203178 |
| chr13 | 26337482 | 26338293 |
| chr13 | 26532158 | 26532855 |
| chr13 | 29036489 | 29038079 |
| chr13 | 29049581 | 29051171 |
| chr13 | 29164324 | 29165081 |
| chr13 | 29347308 | 29348111 |
| chr13 | 29946778 | 29948166 |
| chr13 | 29999723 | 30001086 |
| chr13 | 30076238 | 30078722 |
| chr13 | 30171884 | 30173600 |
| chr13 | 30636314 | 30637538 |
| chr13 | 31065233 | 31066968 |
| chr13 | 31082960 | 31084432 |
| chr13 | 31336560 | 31338234 |
| chr13 | 31649166 | 31652112 |
| chr13 | 31870992 | 31872154 |
| chr13 | 32893208 | 32895520 |
| chr13 | 34128711 | 34130126 |
| chr13 | 34168263 | 34170580 |
| chr13 | 34221069 | 34224751 |
| chr13 | 34240174 | 34242473 |
| chr13 | 34612430 | 34613260 |
| chr13 | 34837798 | 34839683 |
| chr13 | 34967091 | 34968340 |
| chr13 | 35148475 | 35149276 |
| chr13 | 35658278 | 35659407 |
| chr13 | 35829472 | 35831017 |
| chr13 | 35997541 | 35998715 |

|       |          |          |
|-------|----------|----------|
| chr13 | 36059295 | 36062291 |
| chr13 | 36208506 | 36210273 |
| chr13 | 36816064 | 36817454 |
| chr13 | 37354477 | 37355252 |
| chr13 | 37526053 | 37527055 |
| chr13 | 37548607 | 37549991 |
| chr13 | 37916488 | 37920056 |
| chr13 | 37929981 | 37931334 |
| chr13 | 38021037 | 38024459 |
| chr13 | 38084940 | 38086385 |
| chr13 | 38171389 | 38173483 |
| chr13 | 38296357 | 38297849 |
| chr13 | 38403657 | 38405207 |
| chr13 | 38619574 | 38620874 |
| chr13 | 38680716 | 38682614 |
| chr13 | 38725909 | 38727903 |
| chr13 | 38749628 | 38751363 |
| chr13 | 39103391 | 39104221 |
| chr13 | 39428093 | 39429398 |
| chr13 | 39962434 | 39963605 |
| chr13 | 40034222 | 40035344 |
| chr13 | 40690279 | 40692190 |
| chr13 | 40817879 | 40819102 |
| chr13 | 40988858 | 40990237 |
| chr13 | 41095596 | 41097202 |
| chr13 | 41185678 | 41187321 |
| chr13 | 41200055 | 41201643 |
| chr13 | 41406472 | 41407577 |
| chr13 | 41467796 | 41469471 |
| chr13 | 42278598 | 42279983 |
| chr13 | 43266406 | 43267941 |
| chr13 | 43493452 | 43494869 |
| chr13 | 43654205 | 43656253 |
| chr13 | 43959116 | 43961469 |
| chr13 | 44504735 | 44506672 |
| chr13 | 44825847 | 44826981 |
| chr13 | 46764182 | 46765304 |
| chr13 | 47025208 | 47026687 |
| chr13 | 47200108 | 47202076 |
| chr13 | 47242109 | 47243566 |
| chr13 | 48113551 | 48114434 |
| chr13 | 48141308 | 48142556 |
| chr13 | 48391708 | 48392963 |

|       |          |          |
|-------|----------|----------|
| chr13 | 48640627 | 48642971 |
| chr13 | 48647359 | 48648918 |
| chr13 | 48827526 | 48829389 |
| chr13 | 49061250 | 49063271 |
| chr13 | 49063552 | 49064362 |
| chr13 | 49108431 | 49110027 |
| chr13 | 49310476 | 49313275 |
| chr13 | 49435716 | 49437963 |
| chr13 | 49515848 | 49517387 |
| chr13 | 49747253 | 49748991 |
| chr13 | 50512440 | 50514087 |
| chr13 | 50559654 | 50561039 |
| chr13 | 51265797 | 51267478 |
| chr13 | 51297349 | 51299255 |
| chr13 | 51689764 | 51691386 |
| chr13 | 51739743 | 51741568 |
| chr13 | 51746376 | 51748273 |
| chr13 | 52069874 | 52072299 |
| chr13 | 53023869 | 53025561 |
| chr13 | 53328501 | 53330539 |
| chr13 | 53471697 | 53473103 |
| chr13 | 53783644 | 53785033 |
| chr13 | 54166492 | 54168404 |
| chr13 | 54397582 | 54399552 |
| chr13 | 54484758 | 54487091 |
| chr13 | 54569193 | 54570795 |
| chr13 | 54675473 | 54677787 |
| chr13 | 54690718 | 54692874 |
| chr13 | 54722206 | 54723949 |
| chr13 | 54787791 | 54789881 |
| chr13 | 54794234 | 54796842 |
| chr13 | 54964325 | 54966520 |
| chr13 | 54974837 | 54977610 |
| chr13 | 55200082 | 55202032 |
| chr13 | 55205649 | 55207688 |
| chr13 | 55267251 | 55271113 |
| chr13 | 55309999 | 55315584 |
| chr13 | 55348737 | 55349675 |
| chr13 | 55422418 | 55424471 |
| chr13 | 55430228 | 55432958 |
| chr13 | 55463157 | 55464564 |
| chr13 | 55636510 | 55638910 |
| chr13 | 55671700 | 55673142 |



|       |          |          |
|-------|----------|----------|
| chr13 | 55693442 | 55695181 |
| chr13 | 55723137 | 55725255 |
| chr13 | 55735497 | 55737134 |
| chr13 | 55793815 | 55795190 |
| chr13 | 55814833 | 55816788 |
| chr13 | 55828347 | 55829564 |
| chr13 | 55855684 | 55857091 |
| chr13 | 55926348 | 55928452 |
| chr13 | 56248099 | 56249767 |
| chr13 | 56359694 | 56360588 |
| chr13 | 56529806 | 56531939 |
| chr13 | 56874069 | 56876009 |
| chr13 | 56907789 | 56908925 |
| chr13 | 57264945 | 57266497 |
| chr13 | 58111505 | 58113271 |
| chr13 | 58228515 | 58231771 |
| chr13 | 58258081 | 58260189 |
| chr13 | 58315999 | 58318120 |
| chr13 | 58375578 | 58376507 |
| chr13 | 58399995 | 58400758 |
| chr13 | 58485981 | 58487666 |
| chr13 | 58502026 | 58505103 |
| chr13 | 58769759 | 58771223 |
| chr13 | 58907070 | 58910489 |
| chr13 | 58986611 | 58987297 |
| chr13 | 59208928 | 59210005 |
| chr13 | 59756280 | 59758632 |
| chr13 | 59869977 | 59872380 |
| chr13 | 59954706 | 59955639 |
| chr13 | 60276845 | 60279435 |
| chr13 | 60956450 | 60957591 |
| chr13 | 62364699 | 62365541 |
| chr13 | 64181145 | 64182765 |
| chr13 | 64375102 | 64377480 |
| chr13 | 64786440 | 64787912 |
| chr13 | 65341626 | 65343934 |
| chr13 | 65379596 | 65380999 |
| chr13 | 67005155 | 67006871 |
| chr13 | 67129843 | 67130684 |
| chr13 | 67208841 | 67210221 |
| chr13 | 67626115 | 67627486 |
| chr13 | 67653454 | 67654638 |
| chr13 | 67783999 | 67784826 |

|       |          |          |
|-------|----------|----------|
| chr13 | 68885713 | 68887014 |
| chr13 | 70071405 | 70072102 |
| chr13 | 70109114 | 70111057 |
| chr13 | 71567060 | 71567695 |
| chr13 | 71596098 | 71597193 |
| chr13 | 72427873 | 72428602 |
| chr13 | 72529913 | 72530800 |
| chr13 | 73464985 | 73466891 |
| chr13 | 73468056 | 73469363 |
| chr13 | 73740712 | 73742573 |
| chr13 | 74074026 | 74076327 |
| chr13 | 74199258 | 74200053 |
| chr13 | 74487149 | 74488455 |
| chr13 | 74776349 | 74778145 |
| chr13 | 74983170 | 74984437 |
| chr13 | 75227023 | 75228996 |
| chr13 | 75690547 | 75691847 |
| chr13 | 75844490 | 75846027 |
| chr13 | 76080179 | 76081664 |
| chr13 | 76192729 | 76194758 |
| chr13 | 76250218 | 76251465 |
| chr13 | 77054912 | 77055771 |
| chr13 | 77109705 | 77110323 |
| chr13 | 77676675 | 77677477 |
| chr13 | 78203799 | 78204962 |
| chr13 | 78333856 | 78335277 |
| chr13 | 79119500 | 79120425 |
| chr13 | 79436468 | 79437278 |
| chr13 | 80239260 | 80239870 |
| chr13 | 80735383 | 80736095 |
| chr13 | 81024522 | 81026131 |
| chr13 | 81591291 | 81592397 |
| chr13 | 81724584 | 81725267 |
| chr13 | 81921638 | 81923152 |
| chr13 | 82022156 | 82023352 |
| chr13 | 82464572 | 82465705 |
| chr13 | 83401711 | 83402545 |
| chr13 | 83656673 | 83657866 |
| chr13 | 84543980 | 84544826 |
| chr13 | 84580098 | 84580993 |
| chr13 | 84950878 | 84951380 |
| chr13 | 85282799 | 85283436 |
| chr13 | 85427668 | 85429622 |

|       |           |           |
|-------|-----------|-----------|
| chr13 | 86059857  | 86060962  |
| chr13 | 86185769  | 86187067  |
| chr13 | 90182111  | 90182894  |
| chr13 | 90732696  | 90733454  |
| chr13 | 91946657  | 91948236  |
| chr13 | 91954165  | 91955161  |
| chr13 | 93124065  | 93125722  |
| chr13 | 93380210  | 93382060  |
| chr13 | 93614264  | 93615632  |
| chr13 | 93961441  | 93962995  |
| chr13 | 94073082  | 94074986  |
| chr13 | 94268055  | 94270238  |
| chr13 | 94992951  | 94994124  |
| chr13 | 95135061  | 95136064  |
| chr13 | 95451076  | 95452950  |
| chr13 | 95558488  | 95559805  |
| chr13 | 95652184  | 95654383  |
| chr13 | 95991779  | 95993579  |
| chr13 | 96094689  | 96095733  |
| chr13 | 96305287  | 96306988  |
| chr13 | 96368046  | 96369289  |
| chr13 | 96373529  | 96374871  |
| chr13 | 96764580  | 96765805  |
| chr13 | 96900588  | 96903385  |
| chr13 | 97311864  | 97313954  |
| chr13 | 97440120  | 97441643  |
| chr13 | 97518168  | 97519131  |
| chr13 | 97836251  | 97837441  |
| chr13 | 97907389  | 97908431  |
| chr13 | 98205631  | 98207024  |
| chr13 | 98208402  | 98209747  |
| chr13 | 98290645  | 98292150  |
| chr13 | 98940604  | 98942621  |
| chr13 | 99086437  | 99087519  |
| chr13 | 99272374  | 99273663  |
| chr13 | 99273970  | 99275388  |
| chr13 | 99659912  | 99661808  |
| chr13 | 99747057  | 99748001  |
| chr13 | 99863081  | 99863785  |
| chr13 | 100063350 | 100064646 |
| chr13 | 100113521 | 100115934 |
| chr13 | 100679881 | 100681193 |
| chr13 | 100873143 | 100874785 |

|       |           |           |
|-------|-----------|-----------|
| chr13 | 100893917 | 100895609 |
| chr13 | 101321088 | 101323280 |
| chr13 | 101381090 | 101382977 |
| chr13 | 101420414 | 101422244 |
| chr13 | 101438419 | 101440245 |
| chr13 | 101499907 | 101501305 |
| chr13 | 101513297 | 101515000 |
| chr13 | 101710523 | 101711754 |
| chr13 | 102583258 | 102584031 |
| chr13 | 103064911 | 103066269 |
| chr13 | 103445825 | 103447250 |
| chr13 | 104563537 | 104565086 |
| chr13 | 104710864 | 104712238 |
| chr13 | 104967338 | 104969524 |
| chr13 | 105018302 | 105019855 |
| chr13 | 105606466 | 105608092 |
| chr13 | 105728501 | 105729670 |
| chr13 | 105843518 | 105845186 |
| chr13 | 105871639 | 105872849 |
| chr13 | 107440025 | 107440712 |
| chr13 | 107725976 | 107727528 |
| chr13 | 108035383 | 108036269 |
| chr13 | 108222137 | 108222774 |
| chr13 | 108564224 | 108565344 |
| chr13 | 108680098 | 108682064 |
| chr13 | 108724195 | 108725362 |
| chr13 | 108948297 | 108949649 |
| chr13 | 110162702 | 110163438 |
| chr13 | 110415437 | 110416513 |
| chr13 | 111864364 | 111864992 |
| chr13 | 112278822 | 112281070 |
| chr13 | 112327623 | 112328907 |
| chr13 | 112767759 | 112769873 |
| chr13 | 112820917 | 112821936 |
| chr13 | 113253562 | 113255186 |
| chr13 | 113307654 | 113309171 |
| chr13 | 113406713 | 113407870 |
| chr13 | 113441808 | 113443385 |
| chr13 | 113716515 | 113718632 |
| chr13 | 114406339 | 114409738 |
| chr13 | 114525791 | 114527145 |
| chr13 | 114670513 | 114671555 |
| chr13 | 115177460 | 115179301 |

|       |           |           |
|-------|-----------|-----------|
| chr13 | 117243883 | 117244844 |
| chr13 | 118683217 | 118683992 |
| chr13 | 119175137 | 119176741 |
| chr13 | 120196892 | 120198410 |
| chr14 | 8560611   | 8561444   |
| chr14 | 8884798   | 8887891   |
| chr14 | 9004829   | 9006313   |
| chr14 | 11992946  | 11994620  |
| chr14 | 13116318  | 13117604  |
| chr14 | 13383300  | 13384430  |
| chr14 | 13546126  | 13546918  |
| chr14 | 14952606  | 14953734  |
| chr14 | 15964383  | 15965486  |
| chr14 | 16270379  | 16271996  |
| chr14 | 16712103  | 16713264  |
| chr14 | 17081489  | 17082818  |
| chr14 | 18492072  | 18494067  |
| chr14 | 19070338  | 19072387  |
| chr14 | 19102152  | 19104086  |
| chr14 | 19158923  | 19160223  |
| chr14 | 19193904  | 19194660  |
| chr14 | 20568575  | 20572123  |
| chr14 | 20901223  | 20903170  |
| chr14 | 21033829  | 21036726  |
| chr14 | 21364873  | 21366307  |
| chr14 | 21459254  | 21461283  |
| chr14 | 21479015  | 21481573  |
| chr14 | 21521462  | 21523045  |
| chr14 | 21548258  | 21549736  |
| chr14 | 21556247  | 21557448  |
| chr14 | 21870899  | 21872637  |
| chr14 | 21894689  | 21896101  |
| chr14 | 22318919  | 22321060  |
| chr14 | 22649533  | 22651808  |
| chr14 | 22666279  | 22668651  |
| chr14 | 23654769  | 23656533  |
| chr14 | 23940616  | 23941355  |
| chr14 | 24228198  | 24229421  |
| chr14 | 24821956  | 24824911  |
| chr14 | 25063606  | 25065382  |
| chr14 | 25305543  | 25307023  |
| chr14 | 25308982  | 25311131  |
| chr14 | 25598264  | 25599863  |

|       |          |          |
|-------|----------|----------|
| chr14 | 26136933 | 26138612 |
| chr14 | 26479432 | 26482019 |
| chr14 | 26625342 | 26627317 |
| chr14 | 27352807 | 27355615 |
| chr14 | 27398277 | 27400294 |
| chr14 | 27487910 | 27489834 |
| chr14 | 27524209 | 27524728 |
| chr14 | 28240936 | 28243251 |
| chr14 | 28405068 | 28406136 |
| chr14 | 29335114 | 29336284 |
| chr14 | 30791038 | 30792605 |
| chr14 | 30991098 | 30992077 |
| chr14 | 31096982 | 31097936 |
| chr14 | 31292188 | 31293368 |
| chr14 | 31342882 | 31344669 |
| chr14 | 31361944 | 31363531 |
| chr14 | 31527609 | 31529317 |
| chr14 | 31763834 | 31765219 |
| chr14 | 31941252 | 31945021 |
| chr14 | 31989161 | 31991068 |
| chr14 | 32017580 | 32020756 |
| chr14 | 32039789 | 32042006 |
| chr14 | 32149482 | 32150825 |
| chr14 | 32356721 | 32358439 |
| chr14 | 32453258 | 32454949 |
| chr14 | 32642281 | 32644923 |
| chr14 | 32889878 | 32891048 |
| chr14 | 32897802 | 32899946 |
| chr14 | 33013936 | 33015758 |
| chr14 | 33275359 | 33278000 |
| chr14 | 33441106 | 33442625 |
| chr14 | 33648218 | 33650226 |
| chr14 | 34002517 | 34003686 |
| chr14 | 34490441 | 34491945 |
| chr14 | 34724390 | 34725010 |
| chr14 | 34736046 | 34738926 |
| chr14 | 34768252 | 34770463 |
| chr14 | 35123125 | 35125045 |
| chr14 | 35190719 | 35192732 |
| chr14 | 35473176 | 35475001 |
| chr14 | 35486458 | 35488130 |
| chr14 | 35692916 | 35695896 |
| chr14 | 35874132 | 35874760 |

|       |          |          |
|-------|----------|----------|
| chr14 | 35995472 | 35996129 |
| chr14 | 36819303 | 36819877 |
| chr14 | 39356224 | 39356850 |
| chr14 | 40404027 | 40404755 |
| chr14 | 40909765 | 40910704 |
| chr14 | 41359575 | 41360329 |
| chr14 | 41779721 | 41781455 |
| chr14 | 42006849 | 42008230 |
| chr14 | 44876596 | 44877767 |
| chr14 | 45462935 | 45464107 |
| chr14 | 45477751 | 45479344 |
| chr14 | 45949098 | 45950292 |
| chr14 | 46148566 | 46149542 |
| chr14 | 46162724 | 46163571 |
| chr14 | 47005072 | 47006186 |
| chr14 | 47407217 | 47408382 |
| chr14 | 47501313 | 47503648 |
| chr14 | 47551331 | 47552818 |
| chr14 | 47895838 | 47897338 |
| chr14 | 47917641 | 47918942 |
| chr14 | 48040668 | 48041629 |
| chr14 | 48187367 | 48189061 |
| chr14 | 48268488 | 48270326 |
| chr14 | 49065399 | 49066509 |
| chr14 | 49113318 | 49114217 |
| chr14 | 49209278 | 49210811 |
| chr14 | 49292908 | 49294833 |
| chr14 | 49337181 | 49338508 |
| chr14 | 49685126 | 49686737 |
| chr14 | 49760893 | 49762829 |
| chr14 | 49946838 | 49947508 |
| chr14 | 50144014 | 50145904 |
| chr14 | 50681118 | 50682545 |
| chr14 | 51404158 | 51405551 |
| chr14 | 51426849 | 51428005 |
| chr14 | 51543515 | 51545413 |
| chr14 | 51708005 | 51709845 |
| chr14 | 52503690 | 52505276 |
| chr14 | 52583985 | 52584785 |
| chr14 | 52722989 | 52724523 |
| chr14 | 52815917 | 52818100 |
| chr14 | 52876484 | 52878285 |
| chr14 | 52923756 | 52925363 |

|       |          |          |
|-------|----------|----------|
| chr14 | 52932395 | 52936521 |
| chr14 | 53139444 | 53140180 |
| chr14 | 54451644 | 54453625 |
| chr14 | 54658283 | 54658860 |
| chr14 | 54684202 | 54685989 |
| chr14 | 54949632 | 54950388 |
| chr14 | 54979493 | 54981367 |
| chr14 | 55044585 | 55046812 |
| chr14 | 55049735 | 55053276 |
| chr14 | 55135193 | 55137334 |
| chr14 | 55194087 | 55196661 |
| chr14 | 55221378 | 55223443 |
| chr14 | 55235986 | 55237593 |
| chr14 | 55271607 | 55273546 |
| chr14 | 55304743 | 55306633 |
| chr14 | 55432540 | 55433584 |
| chr14 | 55482344 | 55483528 |
| chr14 | 55512126 | 55513083 |
| chr14 | 55513414 | 55514031 |
| chr14 | 55553592 | 55555429 |
| chr14 | 55633100 | 55635239 |
| chr14 | 55690290 | 55694337 |
| chr14 | 55697378 | 55699470 |
| chr14 | 55703359 | 55705583 |
| chr14 | 55712696 | 55715011 |
| chr14 | 55731722 | 55734801 |
| chr14 | 56209382 | 56211611 |
| chr14 | 56261436 | 56263556 |
| chr14 | 56278645 | 56279870 |
| chr14 | 56379617 | 56382418 |
| chr14 | 56472021 | 56474679 |
| chr14 | 56813652 | 56814628 |
| chr14 | 57021010 | 57022075 |
| chr14 | 57190165 | 57191154 |
| chr14 | 57285845 | 57288030 |
| chr14 | 57396137 | 57397693 |
| chr14 | 57430764 | 57432470 |
| chr14 | 57503889 | 57505187 |
| chr14 | 57505448 | 57507492 |
| chr14 | 57616679 | 57617708 |
| chr14 | 57654450 | 57656246 |
| chr14 | 57675860 | 57677246 |
| chr14 | 57711515 | 57712756 |



|       |          |          |
|-------|----------|----------|
| chr14 | 57722177 | 57724201 |
| chr14 | 57963188 | 57964847 |
| chr14 | 58016574 | 58017965 |
| chr14 | 58164174 | 58165588 |
| chr14 | 58283005 | 58284488 |
| chr14 | 58416412 | 58418119 |
| chr14 | 58508195 | 58509451 |
| chr14 | 58617552 | 58618518 |
| chr14 | 59205656 | 59206593 |
| chr14 | 59783286 | 59784019 |
| chr14 | 59819502 | 59820912 |
| chr14 | 60605449 | 60606756 |
| chr14 | 60969398 | 60970108 |
| chr14 | 61752807 | 61754356 |
| chr14 | 61791203 | 61792936 |
| chr14 | 62058432 | 62059365 |
| chr14 | 62174751 | 62176712 |
| chr14 | 62198880 | 62199690 |
| chr14 | 62217423 | 62218856 |
| chr14 | 62266405 | 62268618 |
| chr14 | 62950495 | 62951985 |
| chr14 | 63378304 | 63379310 |
| chr14 | 63455644 | 63457355 |
| chr14 | 63669409 | 63670168 |
| chr14 | 63811557 | 63813198 |
| chr14 | 63996042 | 63997960 |
| chr14 | 64161880 | 64163452 |
| chr14 | 64224157 | 64226072 |
| chr14 | 65567593 | 65569869 |
| chr14 | 65715991 | 65717401 |
| chr14 | 66455376 | 66457017 |
| chr14 | 66688221 | 66689430 |
| chr14 | 66695739 | 66696793 |
| chr14 | 66914702 | 66917136 |
| chr14 | 67000073 | 67001036 |
| chr14 | 67375124 | 67376348 |
| chr14 | 67487480 | 67488720 |
| chr14 | 67528434 | 67531539 |
| chr14 | 67626493 | 67628173 |
| chr14 | 67690779 | 67692234 |
| chr14 | 67868128 | 67869833 |
| chr14 | 68550307 | 68552356 |
| chr14 | 68895950 | 68896978 |

|       |          |          |
|-------|----------|----------|
| chr14 | 69901721 | 69904213 |
| chr14 | 70077352 | 70078753 |
| chr14 | 70842495 | 70843968 |
| chr14 | 70962909 | 70964010 |
| chr14 | 70998395 | 71000089 |
| chr14 | 71034605 | 71036574 |
| chr14 | 71165111 | 71167091 |
| chr14 | 72683463 | 72684491 |
| chr14 | 72905601 | 72906985 |
| chr14 | 72931330 | 72932995 |
| chr14 | 73108657 | 73110694 |
| chr14 | 73379484 | 73381149 |
| chr14 | 73430205 | 73431269 |
| chr14 | 73542522 | 73544322 |
| chr14 | 73725798 | 73726684 |
| chr14 | 73784122 | 73785634 |
| chr14 | 73909445 | 73910700 |
| chr14 | 73924402 | 73925909 |
| chr14 | 73952070 | 73953238 |
| chr14 | 74000894 | 74001842 |
| chr14 | 75276991 | 75278466 |
| chr14 | 75346001 | 75348564 |
| chr14 | 76244185 | 76246080 |
| chr14 | 76509853 | 76511744 |
| chr14 | 76813527 | 76815175 |
| chr14 | 76815488 | 76817008 |
| chr14 | 76893900 | 76895277 |
| chr14 | 76904895 | 76906857 |
| chr14 | 76914782 | 76916661 |
| chr14 | 77139533 | 77140582 |
| chr14 | 77555986 | 77557898 |
| chr14 | 78186788 | 78188169 |
| chr14 | 78607504 | 78608483 |
| chr14 | 78675067 | 78676721 |
| chr14 | 79124129 | 79126130 |
| chr14 | 79174847 | 79176149 |
| chr14 | 79699913 | 79701873 |
| chr14 | 79789644 | 79791478 |
| chr14 | 79825787 | 79826843 |
| chr14 | 79986651 | 79988028 |
| chr14 | 80167921 | 80171803 |
| chr14 | 80173016 | 80174408 |
| chr14 | 80235700 | 80236682 |

|       |           |           |
|-------|-----------|-----------|
| chr14 | 80488109  | 80489338  |
| chr14 | 80755542  | 80756747  |
| chr14 | 81901020  | 81901977  |
| chr14 | 82942158  | 82942933  |
| chr14 | 83357291  | 83357887  |
| chr14 | 86312291  | 86313224  |
| chr14 | 87340043  | 87340761  |
| chr14 | 87540276  | 87541926  |
| chr14 | 87815066  | 87816747  |
| chr14 | 92076369  | 92076994  |
| chr14 | 92633212  | 92633941  |
| chr14 | 93615308  | 93616020  |
| chr14 | 97249228  | 97250135  |
| chr14 | 99723151  | 99725644  |
| chr14 | 99786264  | 99787380  |
| chr14 | 99787421  | 99788643  |
| chr14 | 99915743  | 99917070  |
| chr14 | 100112342 | 100113561 |
| chr14 | 100684375 | 100686361 |
| chr14 | 100743381 | 100744238 |
| chr14 | 101375326 | 101376798 |
| chr14 | 102039026 | 102040086 |
| chr14 | 103346140 | 103347286 |
| chr14 | 103497768 | 103499450 |
| chr14 | 103812860 | 103813503 |
| chr14 | 104118034 | 104119111 |
| chr14 | 104470925 | 104472020 |
| chr14 | 104723718 | 104724732 |
| chr14 | 105575367 | 105577104 |
| chr14 | 105901061 | 105902562 |
| chr14 | 106504859 | 106506955 |
| chr14 | 106706240 | 106706987 |
| chr14 | 108155617 | 108156245 |
| chr14 | 109312603 | 109313443 |
| chr14 | 112073717 | 112075013 |
| chr14 | 112355043 | 112355659 |
| chr14 | 112365992 | 112367207 |
| chr14 | 115231038 | 115231916 |
| chr14 | 115302767 | 115303616 |
| chr14 | 118531316 | 118532359 |
| chr14 | 118535109 | 118537092 |
| chr14 | 118600463 | 118601806 |
| chr14 | 118634412 | 118636840 |

|       |           |           |
|-------|-----------|-----------|
| chr14 | 119089517 | 119091492 |
| chr14 | 119108277 | 119109729 |
| chr14 | 119323268 | 119325264 |
| chr14 | 120460233 | 120461524 |
| chr14 | 120536570 | 120537693 |
| chr14 | 120694727 | 120696318 |
| chr14 | 120876321 | 120877642 |
| chr14 | 121903696 | 121906808 |
| chr14 | 122433124 | 122434477 |
| chr14 | 122579529 | 122581521 |
| chr14 | 122620972 | 122623409 |
| chr14 | 122863009 | 122865214 |
| chr14 | 122874610 | 122876915 |
| chr14 | 123402781 | 123403851 |
| chr14 | 123539588 | 123540619 |
| chr14 | 124008200 | 124008949 |
| chr14 | 124025118 | 124026595 |
| chr14 | 124591151 | 124592605 |
| chr14 | 124952329 | 124952968 |
| chr14 | 125053245 | 125053841 |
| chr15 | 3150066   | 3151472   |
| chr15 | 3154143   | 3155271   |
| chr15 | 3945272   | 3946735   |
| chr15 | 3975821   | 3978198   |
| chr15 | 4622611   | 4623194   |
| chr15 | 4725466   | 4726239   |
| chr15 | 4961748   | 4962479   |
| chr15 | 5066023   | 5067930   |
| chr15 | 5093330   | 5094517   |
| chr15 | 5135045   | 5136756   |
| chr15 | 5216640   | 5217251   |
| chr15 | 7798881   | 7799744   |
| chr15 | 8077247   | 8078807   |
| chr15 | 9069824   | 9071118   |
| chr15 | 9372936   | 9373654   |
| chr15 | 10414952  | 10416582  |
| chr15 | 10654402  | 10655299  |
| chr15 | 11366058  | 11367411  |
| chr15 | 11832943  | 11835556  |
| chr15 | 11924500  | 11926309  |
| chr15 | 12046577  | 12049201  |
| chr15 | 12133906  | 12135109  |
| chr15 | 12202549  | 12204557  |

|       |          |          |
|-------|----------|----------|
| chr15 | 12250131 | 12252490 |
| chr15 | 12302016 | 12305996 |
| chr15 | 12664906 | 12665675 |
| chr15 | 12753744 | 12755431 |
| chr15 | 13051169 | 13052035 |
| chr15 | 14098712 | 14099259 |
| chr15 | 15194945 | 15195519 |
| chr15 | 15372706 | 15373707 |
| chr15 | 15977280 | 15977999 |
| chr15 | 16051118 | 16052044 |
| chr15 | 17102137 | 17102698 |
| chr15 | 20412033 | 20412758 |
| chr15 | 21340602 | 21341665 |
| chr15 | 23227304 | 23228006 |
| chr15 | 25046763 | 25047358 |
| chr15 | 25294346 | 25295684 |
| chr15 | 25653366 | 25654918 |
| chr15 | 25692906 | 25695876 |
| chr15 | 25772357 | 25773886 |
| chr15 | 25913515 | 25915825 |
| chr15 | 26611276 | 26611981 |
| chr15 | 26875921 | 26877009 |
| chr15 | 27559892 | 27561339 |
| chr15 | 27953268 | 27955155 |
| chr15 | 27990083 | 27991311 |
| chr15 | 28188768 | 28189418 |
| chr15 | 29399703 | 29400886 |
| chr15 | 30024805 | 30025628 |
| chr15 | 30102586 | 30103898 |
| chr15 | 30975669 | 30976300 |
| chr15 | 31153216 | 31154782 |
| chr15 | 31246293 | 31247562 |
| chr15 | 31346999 | 31348999 |
| chr15 | 31371385 | 31373932 |
| chr15 | 31530402 | 31532702 |
| chr15 | 32040241 | 32040990 |
| chr15 | 33598528 | 33600001 |
| chr15 | 33616020 | 33617939 |
| chr15 | 33966239 | 33967637 |
| chr15 | 34011950 | 34013974 |
| chr15 | 34095655 | 34096735 |
| chr15 | 34167279 | 34169031 |
| chr15 | 34372101 | 34374163 |

|       |          |          |
|-------|----------|----------|
| chr15 | 34424337 | 34425757 |
| chr15 | 34766443 | 34769221 |
| chr15 | 35118648 | 35119728 |
| chr15 | 35447241 | 35448209 |
| chr15 | 35565033 | 35565672 |
| chr15 | 35866886 | 35868305 |
| chr15 | 36425571 | 36426863 |
| chr15 | 36599277 | 36600736 |
| chr15 | 36653177 | 36655072 |
| chr15 | 36656321 | 36658379 |
| chr15 | 36721909 | 36724993 |
| chr15 | 36867507 | 36870256 |
| chr15 | 36937005 | 36938465 |
| chr15 | 36974865 | 36976360 |
| chr15 | 37064433 | 37066187 |
| chr15 | 37161957 | 37164772 |
| chr15 | 37890010 | 37891242 |
| chr15 | 38129177 | 38130989 |
| chr15 | 38176618 | 38178115 |
| chr15 | 38399835 | 38401594 |
| chr15 | 38447487 | 38449873 |
| chr15 | 38629892 | 38631521 |
| chr15 | 39029544 | 39031277 |
| chr15 | 39268468 | 39269663 |
| chr15 | 39688014 | 39689347 |
| chr15 | 40927102 | 40928089 |
| chr15 | 41487545 | 41488518 |
| chr15 | 41908951 | 41909737 |
| chr15 | 43113437 | 43114700 |
| chr15 | 43308511 | 43309487 |
| chr15 | 44945442 | 44946730 |
| chr15 | 45532240 | 45533540 |
| chr15 | 46679392 | 46679988 |
| chr15 | 46820205 | 46821127 |
| chr15 | 46884454 | 46885282 |
| chr15 | 47139478 | 47140162 |
| chr15 | 49471654 | 49472169 |
| chr15 | 49960294 | 49961254 |
| chr15 | 50195626 | 50196366 |
| chr15 | 50383572 | 50384231 |
| chr15 | 51695792 | 51697461 |
| chr15 | 51822285 | 51823751 |
| chr15 | 51859281 | 51859865 |

|       |          |          |
|-------|----------|----------|
| chr15 | 52543474 | 52544971 |
| chr15 | 53342059 | 53342884 |
| chr15 | 53732845 | 53734833 |
| chr15 | 53815251 | 53816358 |
| chr15 | 54508624 | 54509591 |
| chr15 | 54902805 | 54904331 |
| chr15 | 54942842 | 54945127 |
| chr15 | 55516038 | 55517236 |
| chr15 | 55737227 | 55738863 |
| chr15 | 56716846 | 56717559 |
| chr15 | 57526347 | 57528032 |
| chr15 | 57743208 | 57744293 |
| chr15 | 57840448 | 57841649 |
| chr15 | 57906767 | 57908992 |
| chr15 | 57965298 | 57967384 |
| chr15 | 58051169 | 58051908 |
| chr15 | 58445170 | 58446200 |
| chr15 | 58703298 | 58705261 |
| chr15 | 58720246 | 58722239 |
| chr15 | 58764355 | 58765907 |
| chr15 | 58911708 | 58915077 |
| chr15 | 59145787 | 59147973 |
| chr15 | 59478806 | 59481604 |
| chr15 | 62352863 | 62354252 |
| chr15 | 62524942 | 62526236 |
| chr15 | 62601613 | 62602847 |
| chr15 | 63420726 | 63421949 |
| chr15 | 63855190 | 63856638 |
| chr15 | 63890525 | 63891801 |
| chr15 | 64751512 | 64754006 |
| chr15 | 65103812 | 65104658 |
| chr15 | 65402327 | 65403223 |
| chr15 | 65568192 | 65569514 |
| chr15 | 65618354 | 65619527 |
| chr15 | 65888388 | 65889424 |
| chr15 | 67103507 | 67104265 |
| chr15 | 67863505 | 67864174 |
| chr15 | 68089060 | 68091529 |
| chr15 | 68194591 | 68195613 |
| chr15 | 68199019 | 68200375 |
| chr15 | 68715600 | 68716703 |
| chr15 | 68816602 | 68817624 |
| chr15 | 71859743 | 71861417 |

|       |          |          |
|-------|----------|----------|
| chr15 | 72919875 | 72921715 |
| chr15 | 73015546 | 73017979 |
| chr15 | 73300513 | 73302390 |
| chr15 | 73537344 | 73539610 |
| chr15 | 73695100 | 73696432 |
| chr15 | 74347780 | 74351151 |
| chr15 | 74703114 | 74704430 |
| chr15 | 74915886 | 74917834 |
| chr15 | 75671682 | 75673168 |
| chr15 | 75738846 | 75742428 |
| chr15 | 75810924 | 75813531 |
| chr15 | 75817546 | 75819279 |
| chr15 | 75832138 | 75835774 |
| chr15 | 75909978 | 75912397 |
| chr15 | 76034041 | 76037193 |
| chr15 | 76037662 | 76040201 |
| chr15 | 76049580 | 76051192 |
| chr15 | 76134856 | 76138327 |
| chr15 | 76157167 | 76160538 |
| chr15 | 76173372 | 76175165 |
| chr15 | 76180688 | 76182999 |
| chr15 | 76306619 | 76309117 |
| chr15 | 76348522 | 76351082 |
| chr15 | 76353037 | 76355292 |
| chr15 | 76437339 | 76438478 |
| chr15 | 76469231 | 76470922 |
| chr15 | 76496339 | 76498493 |
| chr15 | 76499010 | 76500954 |
| chr15 | 76545260 | 76546743 |
| chr15 | 76551826 | 76556699 |
| chr15 | 76643189 | 76644668 |
| chr15 | 76646881 | 76649534 |
| chr15 | 76733532 | 76735881 |
| chr15 | 76755030 | 76756488 |
| chr15 | 76778619 | 76780145 |
| chr15 | 76828812 | 76831105 |
| chr15 | 77198146 | 77200026 |
| chr15 | 77591719 | 77595623 |
| chr15 | 77678016 | 77680838 |
| chr15 | 77800008 | 77802144 |
| chr15 | 78235119 | 78238159 |
| chr15 | 78384914 | 78385780 |
| chr15 | 78421874 | 78424270 |



|       |          |          |
|-------|----------|----------|
| chr15 | 78440646 | 78443056 |
| chr15 | 78657190 | 78659140 |
| chr15 | 78706551 | 78708859 |
| chr15 | 78743470 | 78745409 |
| chr15 | 78857077 | 78859934 |
| chr15 | 78871497 | 78874207 |
| chr15 | 78904566 | 78907282 |
| chr15 | 78960332 | 78963138 |
| chr15 | 79022339 | 79024344 |
| chr15 | 79042158 | 79044781 |
| chr15 | 79058646 | 79060709 |
| chr15 | 79081406 | 79083900 |
| chr15 | 79157347 | 79159888 |
| chr15 | 79296077 | 79298198 |
| chr15 | 79376142 | 79378512 |
| chr15 | 79500460 | 79502570 |
| chr15 | 79517532 | 79519059 |
| chr15 | 79520459 | 79522342 |
| chr15 | 79663204 | 79665742 |
| chr15 | 79799969 | 79802009 |
| chr15 | 79816034 | 79817382 |
| chr15 | 79841431 | 79844344 |
| chr15 | 79911139 | 79914646 |
| chr15 | 79944929 | 79948375 |
| chr15 | 79963184 | 79964622 |
| chr15 | 80041163 | 80043631 |
| chr15 | 80063370 | 80065163 |
| chr15 | 80084864 | 80087541 |
| chr15 | 80094133 | 80095360 |
| chr15 | 80201453 | 80203363 |
| chr15 | 80540969 | 80542380 |
| chr15 | 80628193 | 80629548 |
| chr15 | 80778388 | 80779668 |
| chr15 | 81229529 | 81231221 |
| chr15 | 81295628 | 81297617 |
| chr15 | 81344097 | 81346015 |
| chr15 | 81352012 | 81354067 |
| chr15 | 81415173 | 81417864 |
| chr15 | 81493362 | 81495301 |
| chr15 | 81559144 | 81561152 |
| chr15 | 81701651 | 81703826 |
| chr15 | 81790053 | 81791536 |
| chr15 | 81810399 | 81811837 |

|       |          |          |
|-------|----------|----------|
| chr15 | 81876285 | 81878280 |
| chr15 | 81899851 | 81901447 |
| chr15 | 81977156 | 81978780 |
| chr15 | 82104383 | 82105697 |
| chr15 | 82128981 | 82130466 |
| chr15 | 82175510 | 82177763 |
| chr15 | 82183584 | 82185527 |
| chr15 | 82759206 | 82761027 |
| chr15 | 82872330 | 82875675 |
| chr15 | 82880092 | 82882615 |
| chr15 | 82886636 | 82888201 |
| chr15 | 82952178 | 82953579 |
| chr15 | 82978599 | 82980801 |
| chr15 | 83333705 | 83335340 |
| chr15 | 83424502 | 83425919 |
| chr15 | 83575016 | 83577401 |
| chr15 | 83621767 | 83623682 |
| chr15 | 83731956 | 83733801 |
| chr15 | 83935065 | 83936968 |
| chr15 | 84021892 | 84023795 |
| chr15 | 84386876 | 84389100 |
| chr15 | 84753112 | 84755011 |
| chr15 | 85165937 | 85168000 |
| chr15 | 85359419 | 85362753 |
| chr15 | 85499884 | 85503058 |
| chr15 | 85508328 | 85510586 |
| chr15 | 85513720 | 85515649 |
| chr15 | 85529062 | 85531636 |
| chr15 | 85730691 | 85732607 |
| chr15 | 85969594 | 85971542 |
| chr15 | 86043888 | 86045676 |
| chr15 | 86854682 | 86855925 |
| chr15 | 88222090 | 88223348 |
| chr15 | 88315487 | 88317033 |
| chr15 | 88538184 | 88540753 |
| chr15 | 88580548 | 88583023 |
| chr15 | 88649217 | 88651411 |
| chr15 | 88691453 | 88698310 |
| chr15 | 88720600 | 88722616 |
| chr15 | 88812430 | 88814398 |
| chr15 | 88897404 | 88899743 |
| chr15 | 88918707 | 88920789 |
| chr15 | 89002674 | 89005080 |

|       |          |          |
|-------|----------|----------|
| chr15 | 89008690 | 89012375 |
| chr15 | 89041915 | 89043210 |
| chr15 | 89144387 | 89146832 |
| chr15 | 89184857 | 89187248 |
| chr15 | 89259406 | 89261347 |
| chr15 | 89283482 | 89285770 |
| chr15 | 89377691 | 89380055 |
| chr15 | 89413668 | 89416013 |
| chr15 | 90022765 | 90023487 |
| chr15 | 90879198 | 90880738 |
| chr15 | 91029487 | 91030383 |
| chr15 | 91812849 | 91814556 |
| chr15 | 93409668 | 93411244 |
| chr15 | 94391642 | 94392668 |
| chr15 | 95944258 | 95945856 |
| chr15 | 95960500 | 95961657 |
| chr15 | 96114399 | 96117386 |
| chr15 | 96470625 | 96474530 |
| chr15 | 96485937 | 96487000 |
| chr15 | 96532194 | 96533575 |
| chr15 | 96538827 | 96541439 |
| chr15 | 96596657 | 96598058 |
| chr15 | 96623320 | 96624734 |
| chr15 | 96888816 | 96891334 |
| chr15 | 97002613 | 97004536 |
| chr15 | 97201090 | 97202177 |
| chr15 | 97295173 | 97296980 |
| chr15 | 97597504 | 97599060 |
| chr15 | 97984926 | 97987026 |
| chr15 | 98044015 | 98045344 |
| chr15 | 98205393 | 98206178 |
| chr15 | 98327253 | 98328901 |
| chr15 | 98363558 | 98365289 |
| chr15 | 98397133 | 98399253 |
| chr15 | 98492435 | 98493732 |
| chr15 | 98550744 | 98553258 |
| chr15 | 98557189 | 98559771 |
| chr15 | 98578416 | 98579101 |
| chr15 | 98651141 | 98653308 |
| chr15 | 98701281 | 98703065 |
| chr15 | 98710639 | 98712219 |
| chr15 | 98763328 | 98766349 |
| chr15 | 98822850 | 98824887 |

|       |           |           |
|-------|-----------|-----------|
| chr15 | 98928132  | 98930642  |
| chr15 | 99250828  | 99252571  |
| chr15 | 99304006  | 99305578  |
| chr15 | 99481501  | 99483329  |
| chr15 | 99531671  | 99533919  |
| chr15 | 99601902  | 99603634  |
| chr15 | 99868140  | 99870269  |
| chr15 | 100057250 | 100058580 |
| chr15 | 100105633 | 100106472 |
| chr15 | 100110379 | 100112465 |
| chr15 | 100287250 | 100289040 |
| chr15 | 100298523 | 100300321 |
| chr15 | 100434842 | 100436241 |
| chr15 | 100443623 | 100445221 |
| chr15 | 100549535 | 100551695 |
| chr15 | 100700259 | 100701175 |
| chr15 | 100719830 | 100721108 |
| chr15 | 100869196 | 100871460 |
| chr15 | 101107083 | 101109721 |
| chr15 | 101302519 | 101304401 |
| chr15 | 101308956 | 101310833 |
| chr15 | 101485664 | 101486475 |
| chr15 | 101595826 | 101597083 |
| chr15 | 101665212 | 101666037 |
| chr15 | 101675396 | 101677688 |
| chr15 | 101689546 | 101690805 |
| chr15 | 101881949 | 101883184 |
| chr15 | 101903675 | 101905584 |
| chr15 | 102033183 | 102035704 |
| chr15 | 102100506 | 102103021 |
| chr15 | 102109215 | 102112250 |
| chr15 | 102155298 | 102157741 |
| chr15 | 102180373 | 102181761 |
| chr15 | 102235083 | 102236677 |
| chr15 | 102282029 | 102283799 |
| chr15 | 102292356 | 102293041 |
| chr15 | 102454772 | 102456805 |
| chr15 | 102500088 | 102503604 |
| chr15 | 102552097 | 102553999 |
| chr15 | 102576655 | 102578377 |
| chr15 | 102843824 | 102845707 |
| chr15 | 103011882 | 103015115 |
| chr15 | 103045183 | 103046292 |

|       |           |           |
|-------|-----------|-----------|
| chr15 | 103069456 | 103072327 |
| chr15 | 103102758 | 103103993 |
| chr15 | 103260342 | 103261491 |
| chr16 | 3742689   | 3745364   |
| chr16 | 3883936   | 3885593   |
| chr16 | 3908309   | 3909571   |
| chr16 | 4016709   | 4017488   |
| chr16 | 4076684   | 4078401   |
| chr16 | 4280568   | 4281901   |
| chr16 | 4557046   | 4561538   |
| chr16 | 4683505   | 4684973   |
| chr16 | 4788993   | 4790766   |
| chr16 | 4878968   | 4880804   |
| chr16 | 4938397   | 4940241   |
| chr16 | 4963406   | 4965103   |
| chr16 | 5012617   | 5014056   |
| chr16 | 5048626   | 5051150   |
| chr16 | 5202708   | 5204786   |
| chr16 | 5233160   | 5234644   |
| chr16 | 5255369   | 5256709   |
| chr16 | 6746037   | 6746928   |
| chr16 | 7107467   | 7108808   |
| chr16 | 7136993   | 7138328   |
| chr16 | 8469777   | 8472158   |
| chr16 | 8636765   | 8638566   |
| chr16 | 8829102   | 8832220   |
| chr16 | 9252925   | 9253819   |
| chr16 | 10192115  | 10194077  |
| chr16 | 10399190  | 10400849  |
| chr16 | 10834771  | 10835864  |
| chr16 | 11008072  | 11009418  |
| chr16 | 11133861  | 11135150  |
| chr16 | 11174705  | 11177134  |
| chr16 | 11253264  | 11254964  |
| chr16 | 12474712  | 12475353  |
| chr16 | 13109130  | 13111269  |
| chr16 | 13671240  | 13673112  |
| chr16 | 13779917  | 13781395  |
| chr16 | 13983264  | 13984580  |
| chr16 | 14316274  | 14318026  |
| chr16 | 14815296  | 14816568  |
| chr16 | 15593856  | 15595575  |
| chr16 | 15636579  | 15638620  |

|       |          |          |
|-------|----------|----------|
| chr16 | 15886440 | 15888725 |
| chr16 | 16302224 | 16304092 |
| chr16 | 16358112 | 16359440 |
| chr16 | 16506647 | 16507531 |
| chr16 | 16828907 | 16829782 |
| chr16 | 16910619 | 16913074 |
| chr16 | 16983046 | 16984952 |
| chr16 | 17069518 | 17070683 |
| chr16 | 17110747 | 17111776 |
| chr16 | 17124266 | 17125799 |
| chr16 | 17146566 | 17149059 |
| chr16 | 17200241 | 17202619 |
| chr16 | 17219903 | 17221450 |
| chr16 | 17232716 | 17235275 |
| chr16 | 17275709 | 17278837 |
| chr16 | 17405106 | 17407073 |
| chr16 | 17451301 | 17453197 |
| chr16 | 17529898 | 17531632 |
| chr16 | 17575043 | 17577712 |
| chr16 | 17618666 | 17620640 |
| chr16 | 17802020 | 17805469 |
| chr16 | 17890759 | 17892151 |
| chr16 | 17926746 | 17929021 |
| chr16 | 18087986 | 18090193 |
| chr16 | 18247947 | 18249999 |
| chr16 | 18383580 | 18385870 |
| chr16 | 18425523 | 18427677 |
| chr16 | 18498150 | 18499805 |
| chr16 | 18811105 | 18812910 |
| chr16 | 18835686 | 18837617 |
| chr16 | 18875669 | 18878277 |
| chr16 | 19348714 | 19349799 |
| chr16 | 19412919 | 19413550 |
| chr16 | 20301501 | 20303166 |
| chr16 | 20497914 | 20499723 |
| chr16 | 20525430 | 20527472 |
| chr16 | 20535116 | 20536291 |
| chr16 | 20547780 | 20549965 |
| chr16 | 20609662 | 20612584 |
| chr16 | 20620751 | 20623371 |
| chr16 | 20629363 | 20631343 |
| chr16 | 20671991 | 20673800 |
| chr16 | 21332383 | 21334229 |

|       |          |          |
|-------|----------|----------|
| chr16 | 21937970 | 21939299 |
| chr16 | 22008773 | 22010322 |
| chr16 | 22096709 | 22098494 |
| chr16 | 22264810 | 22266653 |
| chr16 | 22427920 | 22429978 |
| chr16 | 22438339 | 22441427 |
| chr16 | 22844028 | 22845078 |
| chr16 | 23106872 | 23109310 |
| chr16 | 23416244 | 23418173 |
| chr16 | 25039675 | 25040887 |
| chr16 | 26128153 | 26128669 |
| chr16 | 27388626 | 27389804 |
| chr16 | 28191057 | 28191624 |
| chr16 | 29418460 | 29419345 |
| chr16 | 29431066 | 29432661 |
| chr16 | 29578761 | 29580281 |
| chr16 | 29657476 | 29659220 |
| chr16 | 29682281 | 29683589 |
| chr16 | 30388141 | 30390750 |
| chr16 | 30687158 | 30688874 |
| chr16 | 30733230 | 30734175 |
| chr16 | 30935351 | 30937360 |
| chr16 | 31080407 | 31082464 |
| chr16 | 31274484 | 31275923 |
| chr16 | 31310891 | 31312113 |
| chr16 | 31347162 | 31348336 |
| chr16 | 31468581 | 31469696 |
| chr16 | 31947882 | 31949069 |
| chr16 | 32112969 | 32114832 |
| chr16 | 32246161 | 32247671 |
| chr16 | 32312096 | 32313220 |
| chr16 | 32331437 | 32333601 |
| chr16 | 32803273 | 32804059 |
| chr16 | 32878815 | 32880222 |
| chr16 | 32913394 | 32915338 |
| chr16 | 33055798 | 33058086 |
| chr16 | 33061762 | 33063890 |
| chr16 | 33184211 | 33186272 |
| chr16 | 33250564 | 33252522 |
| chr16 | 33828983 | 33831073 |
| chr16 | 33966116 | 33967378 |
| chr16 | 34384303 | 34385774 |
| chr16 | 35021842 | 35023422 |

|       |          |          |
|-------|----------|----------|
| chr16 | 35155010 | 35157532 |
| chr16 | 35285670 | 35286759 |
| chr16 | 35441454 | 35443170 |
| chr16 | 35769815 | 35772255 |
| chr16 | 36040844 | 36042197 |
| chr16 | 36071037 | 36072838 |
| chr16 | 36473513 | 36474543 |
| chr16 | 36693689 | 36694713 |
| chr16 | 36887478 | 36888806 |
| chr16 | 37011475 | 37012709 |
| chr16 | 37539270 | 37541087 |
| chr16 | 37653566 | 37654944 |
| chr16 | 37684425 | 37685924 |
| chr16 | 37776444 | 37777800 |
| chr16 | 37789817 | 37791573 |
| chr16 | 37867589 | 37869567 |
| chr16 | 37989040 | 37990027 |
| chr16 | 38088227 | 38090949 |
| chr16 | 38303875 | 38307452 |
| chr16 | 38444867 | 38446260 |
| chr16 | 38451299 | 38453444 |
| chr16 | 38482532 | 38483763 |
| chr16 | 38549596 | 38550790 |
| chr16 | 38562581 | 38563573 |
| chr16 | 41060619 | 41061395 |
| chr16 | 42189865 | 42191688 |
| chr16 | 42276134 | 42277079 |
| chr16 | 42575445 | 42576300 |
| chr16 | 42729804 | 42731427 |
| chr16 | 42876264 | 42877257 |
| chr16 | 43142979 | 43144077 |
| chr16 | 43889476 | 43890726 |
| chr16 | 44557733 | 44559639 |
| chr16 | 44626372 | 44627319 |
| chr16 | 44745580 | 44746875 |
| chr16 | 45742364 | 45743616 |
| chr16 | 46567367 | 46568350 |
| chr16 | 46642456 | 46643071 |
| chr16 | 47375697 | 47376234 |
| chr16 | 48373739 | 48374462 |
| chr16 | 48497199 | 48498416 |
| chr16 | 48993602 | 48994967 |
| chr16 | 49466251 | 49466900 |



|       |          |          |
|-------|----------|----------|
| chr16 | 49698725 | 49700020 |
| chr16 | 50482035 | 50483358 |
| chr16 | 50528406 | 50530954 |
| chr16 | 50890389 | 50891093 |
| chr16 | 51729430 | 51730038 |
| chr16 | 52031045 | 52032418 |
| chr16 | 52452043 | 52453946 |
| chr16 | 53824683 | 53825440 |
| chr16 | 54867960 | 54868727 |
| chr16 | 55934185 | 55935340 |
| chr16 | 55965794 | 55967178 |
| chr16 | 55972739 | 55975371 |
| chr16 | 56028760 | 56030393 |
| chr16 | 56144709 | 56146162 |
| chr16 | 57120443 | 57122659 |
| chr16 | 57230806 | 57232075 |
| chr16 | 57279760 | 57281634 |
| chr16 | 57592892 | 57593767 |
| chr16 | 57605819 | 57607324 |
| chr16 | 58670001 | 58671441 |
| chr16 | 59600051 | 59601305 |
| chr16 | 59638293 | 59639821 |
| chr16 | 60747796 | 60748406 |
| chr16 | 62268097 | 62269320 |
| chr16 | 62570264 | 62571467 |
| chr16 | 62785997 | 62787411 |
| chr16 | 63856377 | 63857764 |
| chr16 | 64850388 | 64852242 |
| chr16 | 65047149 | 65047791 |
| chr16 | 65061960 | 65062422 |
| chr16 | 65322025 | 65322847 |
| chr16 | 66524606 | 66525654 |
| chr16 | 68898171 | 68899432 |
| chr16 | 69208697 | 69209312 |
| chr16 | 69414737 | 69415402 |
| chr16 | 70313897 | 70315260 |
| chr16 | 70331586 | 70332806 |
| chr16 | 70983227 | 70984082 |
| chr16 | 71988983 | 71989705 |
| chr16 | 72284685 | 72285221 |
| chr16 | 72362007 | 72362730 |
| chr16 | 72590181 | 72590745 |
| chr16 | 72693347 | 72694643 |

|       |          |          |
|-------|----------|----------|
| chr16 | 73130217 | 73131180 |
| chr16 | 73656689 | 73657344 |
| chr16 | 74119018 | 74120013 |
| chr16 | 74971196 | 74972177 |
| chr16 | 76788621 | 76789676 |
| chr16 | 77815198 | 77816181 |
| chr16 | 78987799 | 78988755 |
| chr16 | 79661504 | 79662007 |
| chr16 | 79734935 | 79735977 |
| chr16 | 80757632 | 80758582 |
| chr16 | 81859166 | 81859834 |
| chr16 | 82507634 | 82508254 |
| chr16 | 83137429 | 83138392 |
| chr16 | 83262032 | 83262612 |
| chr16 | 83484116 | 83484686 |
| chr16 | 84150249 | 84150884 |
| chr16 | 84275890 | 84277009 |
| chr16 | 84734479 | 84736337 |
| chr16 | 84774110 | 84775643 |
| chr16 | 84834410 | 84836705 |
| chr16 | 84942917 | 84943765 |
| chr16 | 84955400 | 84956056 |
| chr16 | 85172116 | 85174548 |
| chr16 | 87354116 | 87355156 |
| chr16 | 87439877 | 87441749 |
| chr16 | 87495091 | 87496800 |
| chr16 | 87581633 | 87583413 |
| chr16 | 88270369 | 88270923 |
| chr16 | 88527387 | 88528055 |
| chr16 | 89060528 | 89061136 |
| chr16 | 89635862 | 89636605 |
| chr16 | 90220422 | 90221894 |
| chr16 | 90233123 | 90234690 |
| chr16 | 90283211 | 90285895 |
| chr16 | 90692927 | 90694290 |
| chr16 | 90726937 | 90728122 |
| chr16 | 90848361 | 90850372 |
| chr16 | 90896535 | 90898452 |
| chr16 | 90934244 | 90935835 |
| chr16 | 91043445 | 91045941 |
| chr16 | 91269365 | 91271669 |
| chr16 | 91646387 | 91648970 |
| chr16 | 91687896 | 91689764 |

|       |          |          |
|-------|----------|----------|
| chr16 | 91728236 | 91729858 |
| chr16 | 91890958 | 91892646 |
| chr16 | 91931216 | 91932249 |
| chr16 | 91954088 | 91955909 |
| chr16 | 92300609 | 92302490 |
| chr16 | 92423268 | 92424639 |
| chr16 | 92465182 | 92467545 |
| chr16 | 92605546 | 92606524 |
| chr16 | 92629088 | 92631149 |
| chr16 | 92696807 | 92700144 |
| chr16 | 93603561 | 93605258 |
| chr16 | 93675975 | 93677431 |
| chr16 | 93794051 | 93796667 |
| chr16 | 93831928 | 93834080 |
| chr16 | 93883287 | 93885172 |
| chr16 | 93890349 | 93892440 |
| chr16 | 94038254 | 94039710 |
| chr16 | 94510565 | 94513063 |
| chr16 | 94534155 | 94536356 |
| chr16 | 94790258 | 94791805 |
| chr16 | 95193805 | 95195252 |
| chr16 | 96003826 | 96004486 |
| chr16 | 96164697 | 96166317 |
| chr16 | 96211710 | 96213216 |
| chr16 | 96302474 | 96304933 |
| chr16 | 96365855 | 96368115 |
| chr16 | 96979471 | 96981651 |
| chr16 | 97444427 | 97446182 |
| chr16 | 97984248 | 97985891 |
| chr16 | 98182583 | 98184692 |
| chr17 | 3083800  | 3084912  |
| chr17 | 3113839  | 3115965  |
| chr17 | 3557028  | 3558677  |
| chr17 | 4994157  | 4996133  |
| chr17 | 5052286  | 5054119  |
| chr17 | 5439610  | 5441233  |
| chr17 | 5752506  | 5754601  |
| chr17 | 5840515  | 5841937  |
| chr17 | 6986156  | 6988723  |
| chr17 | 7031492  | 7033012  |
| chr17 | 8357759  | 8358977  |
| chr17 | 8475537  | 8477816  |
| chr17 | 8967890  | 8969058  |

|       |          |          |
|-------|----------|----------|
| chr17 | 8993288  | 8994744  |
| chr17 | 9861878  | 9862898  |
| chr17 | 10588978 | 10591123 |
| chr17 | 11153743 | 11154552 |
| chr17 | 11285415 | 11286611 |
| chr17 | 12351827 | 12353429 |
| chr17 | 12510776 | 12512678 |
| chr17 | 12999065 | 13000196 |
| chr17 | 13102266 | 13103492 |
| chr17 | 13108065 | 13110231 |
| chr17 | 13152699 | 13154633 |
| chr17 | 13183926 | 13186067 |
| chr17 | 13981708 | 13982259 |
| chr17 | 15383856 | 15385392 |
| chr17 | 15479252 | 15480950 |
| chr17 | 15634124 | 15637691 |
| chr17 | 15663546 | 15665147 |
| chr17 | 15842451 | 15843281 |
| chr17 | 16813348 | 16814109 |
| chr17 | 16994791 | 16995978 |
| chr17 | 17134063 | 17134665 |
| chr17 | 17628334 | 17630162 |
| chr17 | 18267167 | 18267953 |
| chr17 | 18373120 | 18374404 |
| chr17 | 21081592 | 21083194 |
| chr17 | 21867064 | 21868412 |
| chr17 | 23683075 | 23684492 |
| chr17 | 23809890 | 23811795 |
| chr17 | 23812652 | 23814776 |
| chr17 | 23815766 | 23817692 |
| chr17 | 23939267 | 23940922 |
| chr17 | 23965324 | 23967252 |
| chr17 | 23990104 | 23991553 |
| chr17 | 24166890 | 24168718 |
| chr17 | 24209740 | 24210847 |
| chr17 | 24277811 | 24279306 |
| chr17 | 24304757 | 24307719 |
| chr17 | 24562833 | 24564688 |
| chr17 | 24591325 | 24592634 |
| chr17 | 24606426 | 24608947 |
| chr17 | 24640804 | 24644521 |
| chr17 | 24693284 | 24695064 |
| chr17 | 24793753 | 24795917 |

|       |          |          |
|-------|----------|----------|
| chr17 | 24831817 | 24834301 |
| chr17 | 24986131 | 24988560 |
| chr17 | 25031055 | 25034838 |
| chr17 | 25150412 | 25153511 |
| chr17 | 25376095 | 25377832 |
| chr17 | 25715539 | 25717400 |
| chr17 | 25910249 | 25911894 |
| chr17 | 25921380 | 25922900 |
| chr17 | 25964379 | 25967142 |
| chr17 | 25968438 | 25971417 |
| chr17 | 25997260 | 25998970 |
| chr17 | 26010755 | 26013623 |
| chr17 | 26338823 | 26340986 |
| chr17 | 26389537 | 26390855 |
| chr17 | 26644369 | 26646200 |
| chr17 | 26685603 | 26687162 |
| chr17 | 26851643 | 26853905 |
| chr17 | 26916961 | 26918992 |
| chr17 | 27074982 | 27077357 |
| chr17 | 27153973 | 27156105 |
| chr17 | 27231750 | 27233364 |
| chr17 | 27250016 | 27252596 |
| chr17 | 27269625 | 27271547 |
| chr17 | 27340358 | 27342718 |
| chr17 | 27366180 | 27367844 |
| chr17 | 27691235 | 27693991 |
| chr17 | 27717232 | 27718380 |
| chr17 | 27759036 | 27761616 |
| chr17 | 27770935 | 27772375 |
| chr17 | 28073846 | 28075607 |
| chr17 | 28216029 | 28219849 |
| chr17 | 28265787 | 28269770 |
| chr17 | 28313143 | 28315291 |
| chr17 | 28356613 | 28357557 |
| chr17 | 28367133 | 28368841 |
| chr17 | 28433702 | 28436912 |
| chr17 | 28464428 | 28466847 |
| chr17 | 28498786 | 28500522 |
| chr17 | 28510570 | 28513441 |
| chr17 | 28827552 | 28829500 |
| chr17 | 29031876 | 29034312 |
| chr17 | 29088217 | 29090610 |
| chr17 | 29168600 | 29170598 |

|       |          |          |
|-------|----------|----------|
| chr17 | 29291282 | 29294735 |
| chr17 | 29381723 | 29383593 |
| chr17 | 29394349 | 29395937 |
| chr17 | 29399758 | 29401911 |
| chr17 | 29483509 | 29485786 |
| chr17 | 29534579 | 29537326 |
| chr17 | 29595812 | 29597590 |
| chr17 | 29626373 | 29629443 |
| chr17 | 29686354 | 29687529 |
| chr17 | 29751062 | 29752665 |
| chr17 | 29797103 | 29798522 |
| chr17 | 29852869 | 29855129 |
| chr17 | 29926452 | 29927938 |
| chr17 | 29988530 | 29990987 |
| chr17 | 30049571 | 30051134 |
| chr17 | 30140752 | 30142607 |
| chr17 | 30742359 | 30745391 |
| chr17 | 30748265 | 30749993 |
| chr17 | 31347223 | 31349933 |
| chr17 | 31402358 | 31404120 |
| chr17 | 31496661 | 31499605 |
| chr17 | 31648443 | 31649846 |
| chr17 | 31702229 | 31703250 |
| chr17 | 31794676 | 31796440 |
| chr17 | 31868782 | 31871851 |
| chr17 | 31944748 | 31947645 |
| chr17 | 32034831 | 32036461 |
| chr17 | 32170838 | 32171839 |
| chr17 | 32172629 | 32174259 |
| chr17 | 32236478 | 32238141 |
| chr17 | 32249547 | 32251524 |
| chr17 | 32316838 | 32317838 |
| chr17 | 32420085 | 32422308 |
| chr17 | 32456940 | 32459137 |
| chr17 | 32486305 | 32488129 |
| chr17 | 32500617 | 32502262 |
| chr17 | 32526077 | 32526914 |
| chr17 | 32924086 | 32925789 |
| chr17 | 32946330 | 32947253 |
| chr17 | 32966266 | 32967560 |
| chr17 | 33102041 | 33103877 |
| chr17 | 33129521 | 33131221 |
| chr17 | 33169118 | 33171267 |

|       |          |          |
|-------|----------|----------|
| chr17 | 33225773 | 33227127 |
| chr17 | 33228749 | 33230582 |
| chr17 | 33495111 | 33496300 |
| chr17 | 33530925 | 33531952 |
| chr17 | 33722439 | 33723900 |
| chr17 | 33765023 | 33767034 |
| chr17 | 33786233 | 33787452 |
| chr17 | 33821141 | 33822763 |
| chr17 | 33960394 | 33962466 |
| chr17 | 34036311 | 34038276 |
| chr17 | 34044723 | 34047726 |
| chr17 | 34051154 | 34058140 |
| chr17 | 34065988 | 34068154 |
| chr17 | 34076447 | 34078745 |
| chr17 | 34091410 | 34094038 |
| chr17 | 34159129 | 34162296 |
| chr17 | 34163473 | 34166111 |
| chr17 | 34166940 | 34170182 |
| chr17 | 34254427 | 34260739 |
| chr17 | 34340867 | 34343039 |
| chr17 | 34527979 | 34529740 |
| chr17 | 34535543 | 34537032 |
| chr17 | 34739595 | 34743623 |
| chr17 | 34783050 | 34785007 |
| chr17 | 34807959 | 34810453 |
| chr17 | 35300332 | 35302484 |
| chr17 | 35357036 | 35359265 |
| chr17 | 35371584 | 35374287 |
| chr17 | 35377660 | 35381787 |
| chr17 | 35516136 | 35517672 |
| chr17 | 35622154 | 35623226 |
| chr17 | 35640162 | 35647605 |
| chr17 | 35826490 | 35827454 |
| chr17 | 35971692 | 35975750 |
| chr17 | 35977734 | 35979549 |
| chr17 | 35997653 | 35998993 |
| chr17 | 36052648 | 36056879 |
| chr17 | 36071784 | 36073239 |
| chr17 | 36115177 | 36117709 |
| chr17 | 36219755 | 36222120 |
| chr17 | 36334558 | 36336095 |
| chr17 | 36394112 | 36395253 |
| chr17 | 36407244 | 36409702 |

|       |          |          |
|-------|----------|----------|
| chr17 | 36579906 | 36580536 |
| chr17 | 37094553 | 37096575 |
| chr17 | 37218294 | 37219730 |
| chr17 | 37333599 | 37334880 |
| chr17 | 37347438 | 37349369 |
| chr17 | 39027107 | 39028057 |
| chr17 | 42283684 | 42284256 |
| chr17 | 42619597 | 42620319 |
| chr17 | 43046395 | 43048218 |
| chr17 | 43118644 | 43119570 |
| chr17 | 43173934 | 43175398 |
| chr17 | 43952051 | 43953927 |
| chr17 | 44423419 | 44424142 |
| chr17 | 44744434 | 44745825 |
| chr17 | 45510170 | 45512250 |
| chr17 | 45642741 | 45644665 |
| chr17 | 45671472 | 45672704 |
| chr17 | 45679983 | 45683058 |
| chr17 | 45708579 | 45712106 |
| chr17 | 45731723 | 45734623 |
| chr17 | 45799081 | 45801442 |
| chr17 | 45884883 | 45886537 |
| chr17 | 45958396 | 45960910 |
| chr17 | 46115577 | 46117248 |
| chr17 | 46246841 | 46248528 |
| chr17 | 46289677 | 46290953 |
| chr17 | 46384171 | 46386049 |
| chr17 | 46418703 | 46420650 |
| chr17 | 46519985 | 46521507 |
| chr17 | 46574140 | 46576013 |
| chr17 | 46594347 | 46596364 |
| chr17 | 46633384 | 46634946 |
| chr17 | 46691077 | 46693748 |
| chr17 | 46747481 | 46749436 |
| chr17 | 46782012 | 46784160 |
| chr17 | 46786738 | 46788871 |
| chr17 | 46810369 | 46812444 |
| chr17 | 46888325 | 46890114 |
| chr17 | 46919102 | 46920742 |
| chr17 | 46927032 | 46928337 |
| chr17 | 46982941 | 46984737 |
| chr17 | 46992633 | 46994908 |
| chr17 | 47025984 | 47028615 |



|       |          |          |
|-------|----------|----------|
| chr17 | 47146208 | 47148354 |
| chr17 | 47276126 | 47277655 |
| chr17 | 47505324 | 47507040 |
| chr17 | 47638060 | 47639925 |
| chr17 | 47648078 | 47649757 |
| chr17 | 47667703 | 47669937 |
| chr17 | 47672218 | 47673908 |
| chr17 | 47681826 | 47683228 |
| chr17 | 47708197 | 47709374 |
| chr17 | 47747520 | 47749663 |
| chr17 | 47823883 | 47825874 |
| chr17 | 47838047 | 47841861 |
| chr17 | 47968837 | 47971692 |
| chr17 | 48040755 | 48041898 |
| chr17 | 48053196 | 48056222 |
| chr17 | 48094448 | 48096166 |
| chr17 | 48153123 | 48154008 |
| chr17 | 48167536 | 48169150 |
| chr17 | 48256677 | 48258499 |
| chr17 | 48548020 | 48550257 |
| chr17 | 48605873 | 48607266 |
| chr17 | 48634324 | 48636206 |
| chr17 | 50037890 | 50039114 |
| chr17 | 50328231 | 50330625 |
| chr17 | 50431642 | 50433705 |
| chr17 | 51065899 | 51066537 |
| chr17 | 51317687 | 51319521 |
| chr17 | 51468237 | 51469404 |
| chr17 | 53127960 | 53129016 |
| chr17 | 53321654 | 53322791 |
| chr17 | 53617283 | 53619774 |
| chr17 | 54589576 | 54590237 |
| chr17 | 55378665 | 55379953 |
| chr17 | 55620863 | 55622771 |
| chr17 | 56213944 | 56215528 |
| chr17 | 56255927 | 56257700 |
| chr17 | 56272883 | 56274693 |
| chr17 | 56321997 | 56323812 |
| chr17 | 56395278 | 56397373 |
| chr17 | 56428722 | 56432801 |
| chr17 | 56566539 | 56569156 |
| chr17 | 56649578 | 56652281 |
| chr17 | 56685688 | 56687063 |

|       |          |          |
|-------|----------|----------|
| chr17 | 56722895 | 56725661 |
| chr17 | 56750739 | 56754806 |
| chr17 | 56765589 | 56768329 |
| chr17 | 56811585 | 56813755 |
| chr17 | 56855248 | 56858007 |
| chr17 | 56890056 | 56892164 |
| chr17 | 56892491 | 56895275 |
| chr17 | 56903457 | 56905382 |
| chr17 | 56985324 | 56987797 |
| chr17 | 57000575 | 57002129 |
| chr17 | 57128835 | 57130746 |
| chr17 | 57136210 | 57137615 |
| chr17 | 57149434 | 57151907 |
| chr17 | 57238966 | 57240447 |
| chr17 | 58112862 | 58113747 |
| chr17 | 58697739 | 58698285 |
| chr17 | 58914725 | 58915673 |
| chr17 | 59151741 | 59153020 |
| chr17 | 59707260 | 59708028 |
| chr17 | 60003996 | 60004664 |
| chr17 | 61229957 | 61230524 |
| chr17 | 62086602 | 62087789 |
| chr17 | 63034121 | 63035440 |
| chr17 | 63133311 | 63134405 |
| chr17 | 64021272 | 64022133 |
| chr17 | 64136524 | 64137590 |
| chr17 | 64198338 | 64199822 |
| chr17 | 64561364 | 64562533 |
| chr17 | 64641862 | 64642834 |
| chr17 | 64680597 | 64682186 |
| chr17 | 64842032 | 64842781 |
| chr17 | 65441207 | 65442370 |
| chr17 | 65680185 | 65680825 |
| chr17 | 66245220 | 66246312 |
| chr17 | 66425929 | 66426984 |
| chr17 | 66449867 | 66451750 |
| chr17 | 66584279 | 66585999 |
| chr17 | 66633969 | 66635588 |
| chr17 | 67538092 | 67539584 |
| chr17 | 69185723 | 69187475 |
| chr17 | 69231007 | 69231867 |
| chr17 | 69505761 | 69507423 |
| chr17 | 69541405 | 69543581 |

|       |          |          |
|-------|----------|----------|
| chr17 | 69733111 | 69734070 |
| chr17 | 69816057 | 69817345 |
| chr17 | 69879119 | 69880013 |
| chr17 | 71067284 | 71068808 |
| chr17 | 71154400 | 71156188 |
| chr17 | 71214537 | 71216245 |
| chr17 | 71350815 | 71352443 |
| chr17 | 71875267 | 71876915 |
| chr17 | 71965147 | 71966667 |
| chr17 | 72100078 | 72102294 |
| chr17 | 73064254 | 73064935 |
| chr17 | 73266750 | 73268586 |
| chr17 | 73456541 | 73458379 |
| chr17 | 74058430 | 74060367 |
| chr17 | 74152987 | 74155128 |
| chr17 | 74427330 | 74428795 |
| chr17 | 74508685 | 74509383 |
| chr17 | 74714832 | 74716314 |
| chr17 | 74737766 | 74739106 |
| chr17 | 74926967 | 74929079 |
| chr17 | 75116289 | 75118022 |
| chr17 | 75404137 | 75406542 |
| chr17 | 75821109 | 75822776 |
| chr17 | 75950362 | 75951977 |
| chr17 | 77631319 | 77632153 |
| chr17 | 78228115 | 78228786 |
| chr17 | 78816541 | 78817834 |
| chr17 | 79335802 | 79337477 |
| chr17 | 79532999 | 79533952 |
| chr17 | 79753433 | 79755798 |
| chr17 | 80014030 | 80015579 |
| chr17 | 80112128 | 80114387 |
| chr17 | 80294159 | 80296143 |
| chr17 | 80333061 | 80334347 |
| chr17 | 80462923 | 80463867 |
| chr17 | 80605366 | 80607147 |
| chr17 | 80771881 | 80773645 |
| chr17 | 80881782 | 80883018 |
| chr17 | 80895577 | 80897689 |
| chr17 | 81343156 | 81344715 |
| chr17 | 81463468 | 81464865 |
| chr17 | 81753204 | 81753957 |
| chr17 | 82083006 | 82083575 |

|       |          |          |
|-------|----------|----------|
| chr17 | 82568788 | 82569669 |
| chr17 | 82863229 | 82863832 |
| chr17 | 83381498 | 83382665 |
| chr17 | 83801640 | 83803147 |
| chr17 | 84143725 | 84145093 |
| chr17 | 84864870 | 84866163 |
| chr17 | 85189118 | 85190945 |
| chr17 | 85356010 | 85358361 |
| chr17 | 85488454 | 85490852 |
| chr17 | 87423720 | 87425482 |
| chr17 | 87505541 | 87507591 |
| chr17 | 87549658 | 87550919 |
| chr17 | 87681418 | 87683805 |
| chr17 | 87727607 | 87730214 |
| chr17 | 87764826 | 87766836 |
| chr17 | 87817484 | 87819375 |
| chr17 | 87920602 | 87922532 |
| chr17 | 88071290 | 88072971 |
| chr17 | 88144678 | 88146706 |
| chr17 | 88367789 | 88368615 |
| chr17 | 88654965 | 88656087 |
| chr17 | 88928206 | 88930367 |
| chr17 | 88995867 | 88997385 |
| chr17 | 90793790 | 90794801 |
| chr17 | 91310918 | 91312165 |
| chr17 | 91486780 | 91488634 |
| chr17 | 91895000 | 91895883 |
| chr17 | 93438518 | 93439182 |
| chr17 | 94935017 | 94935627 |
| chr17 | 95148601 | 95150266 |
| chr18 | 3004560  | 3006357  |
| chr18 | 3382266  | 3384026  |
| chr18 | 3506763  | 3508861  |
| chr18 | 4021642  | 4022262  |
| chr18 | 4052195  | 4053059  |
| chr18 | 4198909  | 4200001  |
| chr18 | 4352535  | 4353828  |
| chr18 | 4374614  | 4376550  |
| chr18 | 5986394  | 5987695  |
| chr18 | 5989355  | 5990373  |
| chr18 | 6135166  | 6137407  |
| chr18 | 6240531  | 6242196  |
| chr18 | 6489021  | 6491517  |

|       |          |          |
|-------|----------|----------|
| chr18 | 6515695  | 6517319  |
| chr18 | 7692202  | 7694039  |
| chr18 | 7837836  | 7839368  |
| chr18 | 7868331  | 7870041  |
| chr18 | 8558781  | 8560248  |
| chr18 | 8911277  | 8912323  |
| chr18 | 9197174  | 9198106  |
| chr18 | 9449009  | 9450804  |
| chr18 | 9957019  | 9958834  |
| chr18 | 10181024 | 10182796 |
| chr18 | 10609173 | 10611272 |
| chr18 | 10865456 | 10867107 |
| chr18 | 11053208 | 11055914 |
| chr18 | 11904405 | 11905595 |
| chr18 | 12286734 | 12287785 |
| chr18 | 12898795 | 12900454 |
| chr18 | 14840307 | 14842107 |
| chr18 | 15220232 | 15223559 |
| chr18 | 15308353 | 15310446 |
| chr18 | 17120149 | 17120788 |
| chr18 | 17237221 | 17238049 |
| chr18 | 17793025 | 17794113 |
| chr18 | 18138791 | 18139714 |
| chr18 | 18981479 | 18982616 |
| chr18 | 20217102 | 20218570 |
| chr18 | 20883609 | 20884563 |
| chr18 | 21053622 | 21055732 |
| chr18 | 21158856 | 21161572 |
| chr18 | 21458106 | 21459638 |
| chr18 | 22455523 | 22456263 |
| chr18 | 22501980 | 22502628 |
| chr18 | 22502908 | 22503693 |
| chr18 | 23127586 | 23128241 |
| chr18 | 23147310 | 23147877 |
| chr18 | 24112529 | 24113905 |
| chr18 | 24178474 | 24180118 |
| chr18 | 24279221 | 24280779 |
| chr18 | 24363216 | 24364203 |
| chr18 | 24687634 | 24689120 |
| chr18 | 24734941 | 24736225 |
| chr18 | 24761165 | 24763098 |
| chr18 | 24867206 | 24869271 |
| chr18 | 25326458 | 25328421 |

|       |          |          |
|-------|----------|----------|
| chr18 | 25644724 | 25646290 |
| chr18 | 25714515 | 25715725 |
| chr18 | 25911303 | 25912774 |
| chr18 | 26512926 | 26513837 |
| chr18 | 27621252 | 27621852 |
| chr18 | 30432043 | 30432993 |
| chr18 | 31605978 | 31607505 |
| chr18 | 31948147 | 31949904 |
| chr18 | 31963312 | 31964495 |
| chr18 | 32069633 | 32071303 |
| chr18 | 32097882 | 32099767 |
| chr18 | 32226985 | 32228659 |
| chr18 | 32292046 | 32293839 |
| chr18 | 32683009 | 32684437 |
| chr18 | 32996449 | 32997483 |
| chr18 | 33203553 | 33204364 |
| chr18 | 33716718 | 33717706 |
| chr18 | 33843130 | 33843984 |
| chr18 | 33890348 | 33891920 |
| chr18 | 33953491 | 33955187 |
| chr18 | 34211832 | 34213609 |
| chr18 | 34309018 | 34310037 |
| chr18 | 34379469 | 34381618 |
| chr18 | 34531869 | 34533134 |
| chr18 | 34783153 | 34784992 |
| chr18 | 34810085 | 34811899 |
| chr18 | 35089955 | 35092427 |
| chr18 | 35113219 | 35115153 |
| chr18 | 35202748 | 35205970 |
| chr18 | 35228607 | 35229654 |
| chr18 | 35253474 | 35255078 |
| chr18 | 35277937 | 35279535 |
| chr18 | 35721344 | 35723566 |
| chr18 | 35820632 | 35822837 |
| chr18 | 35824130 | 35825466 |
| chr18 | 36007083 | 36010855 |
| chr18 | 36071987 | 36074001 |
| chr18 | 36077971 | 36080696 |
| chr18 | 36089665 | 36090832 |
| chr18 | 36095770 | 36098418 |
| chr18 | 36445421 | 36447711 |
| chr18 | 36486299 | 36488984 |
| chr18 | 36613522 | 36614755 |

|       |          |          |
|-------|----------|----------|
| chr18 | 36684261 | 36685959 |
| chr18 | 36718923 | 36721422 |
| chr18 | 36837944 | 36840324 |
| chr18 | 36903467 | 36905051 |
| chr18 | 36953200 | 36954361 |
| chr18 | 37303167 | 37304780 |
| chr18 | 37596684 | 37597804 |
| chr18 | 37645863 | 37647518 |
| chr18 | 37657974 | 37659292 |
| chr18 | 37665181 | 37666529 |
| chr18 | 37789591 | 37790257 |
| chr18 | 37833687 | 37835101 |
| chr18 | 37874180 | 37875521 |
| chr18 | 37885163 | 37886575 |
| chr18 | 37896031 | 37897675 |
| chr18 | 37906479 | 37908018 |
| chr18 | 37965455 | 37967487 |
| chr18 | 37982952 | 37985927 |
| chr18 | 37994741 | 37996192 |
| chr18 | 38036705 | 38037528 |
| chr18 | 38408905 | 38411087 |
| chr18 | 38526805 | 38528811 |
| chr18 | 38701718 | 38703177 |
| chr18 | 38758946 | 38762848 |
| chr18 | 39445780 | 39446882 |
| chr18 | 39556552 | 39558121 |
| chr18 | 39648235 | 39650151 |
| chr18 | 39650517 | 39651935 |
| chr18 | 40593928 | 40594496 |
| chr18 | 41409194 | 41410262 |
| chr18 | 41985634 | 41986525 |
| chr18 | 42669941 | 42672121 |
| chr18 | 43057597 | 43059656 |
| chr18 | 43366565 | 43368043 |
| chr18 | 43888169 | 43888783 |
| chr18 | 44534345 | 44535543 |
| chr18 | 44820632 | 44822786 |
| chr18 | 44970745 | 44972212 |
| chr18 | 45717587 | 45721086 |
| chr18 | 46138531 | 46139547 |
| chr18 | 46357386 | 46358983 |
| chr18 | 46439350 | 46440921 |
| chr18 | 46470873 | 46472413 |

|       |          |          |
|-------|----------|----------|
| chr18 | 46514720 | 46516967 |
| chr18 | 46684530 | 46686526 |
| chr18 | 46756944 | 46758469 |
| chr18 | 46852196 | 46852844 |
| chr18 | 46900523 | 46902267 |
| chr18 | 47008492 | 47010735 |
| chr18 | 47117497 | 47119002 |
| chr18 | 47234395 | 47235261 |
| chr18 | 47526453 | 47529160 |
| chr18 | 49914656 | 49916142 |
| chr18 | 50287430 | 50288613 |
| chr18 | 50427664 | 50428744 |
| chr18 | 50942076 | 50942912 |
| chr18 | 51924068 | 51924790 |
| chr18 | 52164748 | 52165648 |
| chr18 | 52624408 | 52625985 |
| chr18 | 53035098 | 53036328 |
| chr18 | 53335632 | 53337057 |
| chr18 | 53726008 | 53727257 |
| chr18 | 54635313 | 54636325 |
| chr18 | 55057329 | 55058255 |
| chr18 | 55146516 | 55147948 |
| chr18 | 56368653 | 56370215 |
| chr18 | 56528662 | 56530154 |
| chr18 | 56731789 | 56733588 |
| chr18 | 56835153 | 56836596 |
| chr18 | 56836778 | 56839496 |
| chr18 | 56866682 | 56869909 |
| chr18 | 57133835 | 57136053 |
| chr18 | 57513940 | 57515222 |
| chr18 | 58818557 | 58819733 |
| chr18 | 58937235 | 58938665 |
| chr18 | 58995341 | 58997893 |
| chr18 | 59082335 | 59083370 |
| chr18 | 60684957 | 60687122 |
| chr18 | 60719939 | 60721207 |
| chr18 | 60754536 | 60756462 |
| chr18 | 60760890 | 60764475 |
| chr18 | 60933669 | 60936948 |
| chr18 | 61007929 | 61009195 |
| chr18 | 61047592 | 61048781 |
| chr18 | 61128669 | 61130411 |
| chr18 | 61137098 | 61138594 |



|       |          |          |
|-------|----------|----------|
| chr18 | 61558313 | 61560911 |
| chr18 | 61714364 | 61715953 |
| chr18 | 61716040 | 61717211 |
| chr18 | 61860924 | 61862381 |
| chr18 | 61885173 | 61887075 |
| chr18 | 61897931 | 61899375 |
| chr18 | 62069910 | 62071618 |
| chr18 | 62088685 | 62091515 |
| chr18 | 62338228 | 62340400 |
| chr18 | 62707599 | 62709241 |
| chr18 | 63545502 | 63547198 |
| chr18 | 63659415 | 63660525 |
| chr18 | 63811023 | 63817164 |
| chr18 | 63867222 | 63869199 |
| chr18 | 64172800 | 64174674 |
| chr18 | 64424028 | 64427183 |
| chr18 | 64500200 | 64501491 |
| chr18 | 64587615 | 64588620 |
| chr18 | 64647487 | 64649307 |
| chr18 | 64675532 | 64677827 |
| chr18 | 65034215 | 65036064 |
| chr18 | 65045371 | 65047381 |
| chr18 | 65425445 | 65427339 |
| chr18 | 65575816 | 65577711 |
| chr18 | 65724712 | 65726046 |
| chr18 | 65738265 | 65742260 |
| chr18 | 65862828 | 65864483 |
| chr18 | 65991858 | 65993071 |
| chr18 | 66049695 | 66050667 |
| chr18 | 66096892 | 66099539 |
| chr18 | 66161029 | 66162905 |
| chr18 | 67094035 | 67094809 |
| chr18 | 67128306 | 67129254 |
| chr18 | 67364274 | 67366400 |
| chr18 | 67404415 | 67406133 |
| chr18 | 67438027 | 67439459 |
| chr18 | 67523139 | 67524958 |
| chr18 | 67560710 | 67562289 |
| chr18 | 67883151 | 67884775 |
| chr18 | 67934109 | 67935817 |
| chr18 | 68641148 | 68641771 |
| chr18 | 69030487 | 69031398 |
| chr18 | 69503300 | 69504847 |

|       |          |          |
|-------|----------|----------|
| chr18 | 69820076 | 69821532 |
| chr18 | 69834392 | 69836040 |
| chr18 | 69938803 | 69940196 |
| chr18 | 70631225 | 70633187 |
| chr18 | 70688845 | 70690590 |
| chr18 | 70727461 | 70728274 |
| chr18 | 70733413 | 70734532 |
| chr18 | 73508915 | 73510074 |
| chr18 | 73732255 | 73734363 |
| chr18 | 73846814 | 73847705 |
| chr18 | 74089509 | 74091087 |
| chr18 | 74338065 | 74338867 |
| chr18 | 74375296 | 74380330 |
| chr18 | 75153704 | 75154852 |
| chr18 | 75159358 | 75161129 |
| chr18 | 75164898 | 75166026 |
| chr18 | 75488245 | 75490766 |
| chr18 | 75569316 | 75570562 |
| chr18 | 75857029 | 75858393 |
| chr18 | 75885341 | 75886207 |
| chr18 | 76049981 | 76051037 |
| chr18 | 76193987 | 76195799 |
| chr18 | 76246113 | 76247831 |
| chr18 | 76304532 | 76306759 |
| chr18 | 76495594 | 76496923 |
| chr18 | 77182067 | 77183561 |
| chr18 | 77275963 | 77277570 |
| chr18 | 77808503 | 77810558 |
| chr18 | 77959804 | 77961705 |
| chr18 | 78005827 | 78007189 |
| chr18 | 78011977 | 78013627 |
| chr18 | 78244889 | 78245992 |
| chr18 | 80347170 | 80349128 |
| chr18 | 80402921 | 80404751 |
| chr18 | 80491691 | 80493786 |
| chr18 | 80665180 | 80667719 |
| chr18 | 81130021 | 81131305 |
| chr18 | 81181984 | 81183320 |
| chr18 | 81379384 | 81380796 |
| chr18 | 82121312 | 82122568 |
| chr18 | 82177806 | 82179445 |
| chr18 | 82574726 | 82576938 |
| chr18 | 82898703 | 82899914 |

|       |          |          |
|-------|----------|----------|
| chr18 | 82935413 | 82937455 |
| chr18 | 82981321 | 82983899 |
| chr18 | 83003423 | 83004770 |
| chr18 | 83124904 | 83127142 |
| chr18 | 83440332 | 83441545 |
| chr18 | 84260887 | 84262584 |
| chr18 | 84758050 | 84759774 |
| chr18 | 84767217 | 84768610 |
| chr18 | 85081491 | 85083124 |
| chr18 | 85120279 | 85121932 |
| chr18 | 85494260 | 85495044 |
| chr18 | 85817171 | 85818086 |
| chr18 | 85895509 | 85896451 |
| chr18 | 86729284 | 86730340 |
| chr18 | 87491178 | 87492472 |
| chr18 | 88006573 | 88007584 |
| chr18 | 88908168 | 88909023 |
| chr18 | 89118912 | 89120720 |
| chr18 | 89140792 | 89141851 |
| chr18 | 90319901 | 90320496 |
| chr18 | 90339988 | 90340908 |
| chr18 | 90678989 | 90680512 |
| chr19 | 3282186  | 3283748  |
| chr19 | 3388451  | 3389901  |
| chr19 | 3574519  | 3576752  |
| chr19 | 3685078  | 3688617  |
| chr19 | 3718573  | 3720006  |
| chr19 | 3743885  | 3744844  |
| chr19 | 3766574  | 3769306  |
| chr19 | 3850854  | 3852873  |
| chr19 | 3911623  | 3914165  |
| chr19 | 4120587  | 4122121  |
| chr19 | 4125095  | 4126996  |
| chr19 | 4162326  | 4164208  |
| chr19 | 4184424  | 4186466  |
| chr19 | 4192102  | 4193721  |
| chr19 | 4257173  | 4258754  |
| chr19 | 4304731  | 4306881  |
| chr19 | 4395638  | 4398860  |
| chr19 | 4624597  | 4626591  |
| chr19 | 4697428  | 4698954  |
| chr19 | 4708134  | 4709414  |
| chr19 | 4755491  | 4757607  |

|       |         |         |
|-------|---------|---------|
| chr19 | 4793046 | 4794717 |
| chr19 | 4810340 | 4812599 |
| chr19 | 4905690 | 4907739 |
| chr19 | 4961594 | 4962921 |
| chr19 | 5023339 | 5024874 |
| chr19 | 5087477 | 5089849 |
| chr19 | 5105792 | 5107904 |
| chr19 | 5294370 | 5295953 |
| chr19 | 5306031 | 5308357 |
| chr19 | 5365790 | 5368471 |
| chr19 | 5387900 | 5389499 |
| chr19 | 5424831 | 5426533 |
| chr19 | 5456167 | 5458187 |
| chr19 | 5490011 | 5492037 |
| chr19 | 5566416 | 5571467 |
| chr19 | 5608948 | 5611093 |
| chr19 | 5636525 | 5639069 |
| chr19 | 5687108 | 5690050 |
| chr19 | 5802258 | 5804468 |
| chr19 | 5911709 | 5913664 |
| chr19 | 5979915 | 5982344 |
| chr19 | 6014082 | 6016947 |
| chr19 | 6056665 | 6058815 |
| chr19 | 6076104 | 6078011 |
| chr19 | 6084572 | 6086351 |
| chr19 | 6139952 | 6142414 |
| chr19 | 6333870 | 6336177 |
| chr19 | 6362790 | 6364985 |
| chr19 | 6501526 | 6503622 |
| chr19 | 6513434 | 6517448 |
| chr19 | 6928997 | 6931693 |
| chr19 | 6983530 | 6985239 |
| chr19 | 7014824 | 7017848 |
| chr19 | 7024431 | 7027836 |
| chr19 | 7047838 | 7050700 |
| chr19 | 7130572 | 7133411 |
| chr19 | 7279945 | 7281888 |
| chr19 | 7291191 | 7293016 |
| chr19 | 7414807 | 7417451 |
| chr19 | 7567817 | 7569760 |
| chr19 | 7631034 | 7632768 |
| chr19 | 7742671 | 7743501 |
| chr19 | 8326132 | 8327720 |

|       |          |          |
|-------|----------|----------|
| chr19 | 8602364  | 8603542  |
| chr19 | 8787093  | 8789010  |
| chr19 | 8796833  | 8799288  |
| chr19 | 8809563  | 8811493  |
| chr19 | 8830987  | 8832213  |
| chr19 | 8844763  | 8846707  |
| chr19 | 8847786  | 8850174  |
| chr19 | 8892933  | 8896265  |
| chr19 | 8910720  | 8913306  |
| chr19 | 8945492  | 8947502  |
| chr19 | 8954188  | 8955812  |
| chr19 | 8962930  | 8963991  |
| chr19 | 8971207  | 8973673  |
| chr19 | 9002586  | 9005339  |
| chr19 | 9014735  | 9018011  |
| chr19 | 9027497  | 9028964  |
| chr19 | 9040972  | 9042934  |
| chr19 | 9134901  | 9136604  |
| chr19 | 9209040  | 9211007  |
| chr19 | 9827812  | 9828942  |
| chr19 | 10056134 | 10058231 |
| chr19 | 10174276 | 10176621 |
| chr19 | 10203380 | 10205106 |
| chr19 | 10277723 | 10279377 |
| chr19 | 10305505 | 10308526 |
| chr19 | 10340614 | 10342914 |
| chr19 | 10343735 | 10345378 |
| chr19 | 10599090 | 10600743 |
| chr19 | 10629785 | 10631282 |
| chr19 | 10650712 | 10652473 |
| chr19 | 10678958 | 10680946 |
| chr19 | 10895477 | 10897282 |
| chr19 | 10955446 | 10956996 |
| chr19 | 10969085 | 10970659 |
| chr19 | 11014060 | 11016481 |
| chr19 | 11022679 | 11024725 |
| chr19 | 11280069 | 11280689 |
| chr19 | 11373678 | 11374859 |
| chr19 | 12541001 | 12542565 |
| chr19 | 12574775 | 12576928 |
| chr19 | 12669871 | 12671952 |
| chr19 | 12870004 | 12871644 |
| chr19 | 13844790 | 13845412 |

|       |          |          |
|-------|----------|----------|
| chr19 | 14342079 | 14342982 |
| chr19 | 14672115 | 14673806 |
| chr19 | 14709401 | 14710556 |
| chr19 | 15337028 | 15338337 |
| chr19 | 15382417 | 15383403 |
| chr19 | 15688739 | 15690281 |
| chr19 | 16070921 | 16071950 |
| chr19 | 16206231 | 16207304 |
| chr19 | 16207572 | 16208686 |
| chr19 | 17210952 | 17211895 |
| chr19 | 20647897 | 20648730 |
| chr19 | 20829492 | 20830269 |
| chr19 | 21292439 | 21293058 |
| chr19 | 21748573 | 21749938 |
| chr19 | 23207087 | 23212220 |
| chr19 | 23213942 | 23216926 |
| chr19 | 23217278 | 23219234 |
| chr19 | 23347575 | 23348838 |
| chr19 | 23761416 | 23762886 |
| chr19 | 23890448 | 23891849 |
| chr19 | 23966586 | 23968955 |
| chr19 | 24550847 | 24553099 |
| chr19 | 25579654 | 25581812 |
| chr19 | 25746419 | 25749384 |
| chr19 | 26822203 | 26823256 |
| chr19 | 27312468 | 27313198 |
| chr19 | 28085752 | 28087599 |
| chr19 | 28908974 | 28910373 |
| chr19 | 29722133 | 29723307 |
| chr19 | 29746582 | 29748362 |
| chr19 | 29886376 | 29888206 |
| chr19 | 29905270 | 29906364 |
| chr19 | 30091759 | 30092827 |
| chr19 | 30104039 | 30106564 |
| chr19 | 30837833 | 30838902 |
| chr19 | 31156584 | 31158172 |
| chr19 | 32462392 | 32465177 |
| chr19 | 32829954 | 32833551 |
| chr19 | 33360411 | 33361167 |
| chr19 | 34266235 | 34267616 |
| chr19 | 34344166 | 34345885 |
| chr19 | 34952241 | 34954137 |
| chr19 | 34974058 | 34975205 |

|       |          |          |
|-------|----------|----------|
| chr19 | 34996143 | 34997353 |
| chr19 | 35308239 | 35309463 |
| chr19 | 35977867 | 35978871 |
| chr19 | 36130996 | 36132077 |
| chr19 | 36157646 | 36159051 |
| chr19 | 36628140 | 36630074 |
| chr19 | 36841466 | 36842706 |
| chr19 | 36907494 | 36909673 |
| chr19 | 36999886 | 37001340 |
| chr19 | 37308212 | 37309316 |
| chr19 | 37449675 | 37451667 |
| chr19 | 37508266 | 37510466 |
| chr19 | 37569380 | 37570672 |
| chr19 | 37624840 | 37625874 |
| chr19 | 37869464 | 37871044 |
| chr19 | 37900352 | 37901598 |
| chr19 | 38597910 | 38599644 |
| chr19 | 39004731 | 39006242 |
| chr19 | 40344791 | 40346584 |
| chr19 | 40399789 | 40401365 |
| chr19 | 40686096 | 40687284 |
| chr19 | 40905248 | 40907052 |
| chr19 | 40947223 | 40948544 |
| chr19 | 40968213 | 40970272 |
| chr19 | 41370471 | 41371760 |
| chr19 | 41557503 | 41558430 |
| chr19 | 41875365 | 41877088 |
| chr19 | 41985981 | 41988001 |
| chr19 | 42007017 | 42008524 |
| chr19 | 42055006 | 42056744 |
| chr19 | 42160001 | 42161543 |
| chr19 | 42356951 | 42359085 |
| chr19 | 42372719 | 42374389 |
| chr19 | 42505341 | 42507301 |
| chr19 | 42826028 | 42827447 |
| chr19 | 43312054 | 43312608 |
| chr19 | 43500961 | 43502670 |
| chr19 | 43514540 | 43517115 |
| chr19 | 43598148 | 43599925 |
| chr19 | 43748746 | 43750923 |
| chr19 | 44219743 | 44221332 |
| chr19 | 44584972 | 44587015 |
| chr19 | 44593021 | 44594367 |

|       |          |          |
|-------|----------|----------|
| chr19 | 44628706 | 44630468 |
| chr19 | 44636910 | 44638335 |
| chr19 | 44800175 | 44801846 |
| chr19 | 44916737 | 44918343 |
| chr19 | 44982151 | 44984435 |
| chr19 | 45004939 | 45006601 |
| chr19 | 45065211 | 45067611 |
| chr19 | 45079977 | 45082026 |
| chr19 | 45110591 | 45112838 |
| chr19 | 45250009 | 45251994 |
| chr19 | 45391038 | 45392349 |
| chr19 | 45437153 | 45439288 |
| chr19 | 45634231 | 45635702 |
| chr19 | 45822782 | 45825006 |
| chr19 | 45891840 | 45893949 |
| chr19 | 46121766 | 46122709 |
| chr19 | 46130109 | 46132806 |
| chr19 | 46149404 | 46151213 |
| chr19 | 46209678 | 46212349 |
| chr19 | 46226212 | 46227932 |
| chr19 | 46382264 | 46385381 |
| chr19 | 46411849 | 46414328 |
| chr19 | 46422873 | 46424201 |
| chr19 | 46430868 | 46433532 |
| chr19 | 46470888 | 46472066 |
| chr19 | 46575894 | 46579090 |
| chr19 | 46672147 | 46674373 |
| chr19 | 46764042 | 46765347 |
| chr19 | 46798786 | 46799738 |
| chr19 | 46835258 | 46838280 |
| chr19 | 47086517 | 47088108 |
| chr19 | 47093586 | 47094984 |
| chr19 | 47141474 | 47143198 |
| chr19 | 47251938 | 47254543 |
| chr19 | 47360392 | 47362756 |
| chr19 | 47939688 | 47940568 |
| chr19 | 49534679 | 49535289 |
| chr19 | 49597369 | 49598165 |
| chr19 | 53111962 | 53113660 |
| chr19 | 53125846 | 53127457 |
| chr19 | 53384620 | 53385858 |
| chr19 | 53463907 | 53466594 |
| chr19 | 53501330 | 53503383 |



|       |          |          |
|-------|----------|----------|
| chr19 | 53674181 | 53675791 |
| chr19 | 53728016 | 53729284 |
| chr19 | 54018193 | 54019346 |
| chr19 | 54209745 | 54211242 |
| chr19 | 54359783 | 54361096 |
| chr19 | 55389951 | 55391916 |
| chr19 | 55786236 | 55787803 |
| chr19 | 55792118 | 55795986 |
| chr19 | 56071482 | 56073681 |
| chr19 | 56288512 | 56289468 |
| chr19 | 56484421 | 56485212 |
| chr19 | 56622101 | 56623885 |
| chr19 | 56738344 | 56740061 |
| chr19 | 56895741 | 56897444 |
| chr19 | 57104721 | 57106415 |
| chr19 | 57267118 | 57268461 |
| chr19 | 57397978 | 57398901 |
| chr19 | 57499407 | 57501008 |
| chr19 | 57526868 | 57528121 |
| chr19 | 57842407 | 57843429 |
| chr19 | 58469396 | 58471049 |
| chr19 | 58586174 | 58587475 |
| chr19 | 58974916 | 58976027 |
| chr19 | 59148988 | 59150610 |
| chr19 | 59418818 | 59421120 |
| chr19 | 59505771 | 59507543 |
| chr19 | 59781707 | 59784972 |
| chr19 | 60018953 | 60020358 |
| chr19 | 60301899 | 60303460 |
| chr19 | 60347407 | 60348385 |
| chr19 | 60542595 | 60544716 |
| chr19 | 60655805 | 60657465 |
| chr19 | 60831382 | 60833673 |
| chr19 | 60865313 | 60867420 |
| chr19 | 60886731 | 60888387 |
| chr19 | 60949392 | 60950768 |
| chr19 | 60964732 | 60966900 |
| chr19 | 61300433 | 61304425 |
| chr19 | 61340308 | 61342326 |
| chr2  | 3248685  | 3250583  |
| chr2  | 3391375  | 3392803  |
| chr2  | 3429325  | 3430925  |
| chr2  | 4480011  | 4481474  |

|      |          |          |
|------|----------|----------|
| chr2 | 4632180  | 4632962  |
| chr2 | 4664309  | 4664873  |
| chr2 | 4932791  | 4934741  |
| chr2 | 5273037  | 5274572  |
| chr2 | 5815271  | 5817176  |
| chr2 | 6020885  | 6022815  |
| chr2 | 6242606  | 6244873  |
| chr2 | 6760347  | 6761473  |
| chr2 | 6830249  | 6831473  |
| chr2 | 7336477  | 7337106  |
| chr2 | 7843433  | 7844418  |
| chr2 | 7958731  | 7959434  |
| chr2 | 9133437  | 9134604  |
| chr2 | 9779583  | 9781035  |
| chr2 | 9969327  | 9970991  |
| chr2 | 10001249 | 10002821 |
| chr2 | 10221858 | 10223499 |
| chr2 | 10293378 | 10296657 |
| chr2 | 11042042 | 11043217 |
| chr2 | 11093603 | 11094485 |
| chr2 | 11357484 | 11358415 |
| chr2 | 11424523 | 11425929 |
| chr2 | 11523951 | 11525313 |
| chr2 | 11585502 | 11586609 |
| chr2 | 11698440 | 11700677 |
| chr2 | 13191875 | 13193441 |
| chr2 | 13579156 | 13580022 |
| chr2 | 13976572 | 13978204 |
| chr2 | 14061184 | 14062289 |
| chr2 | 14210099 | 14211292 |
| chr2 | 14216799 | 14217785 |
| chr2 | 14525369 | 14526917 |
| chr2 | 15836216 | 15837040 |
| chr2 | 16303118 | 16304125 |
| chr2 | 16690207 | 16691275 |
| chr2 | 17245743 | 17246292 |
| chr2 | 17592368 | 17593772 |
| chr2 | 17797911 | 17799783 |
| chr2 | 17820760 | 17822516 |
| chr2 | 17961028 | 17963517 |
| chr2 | 17967733 | 17969950 |
| chr2 | 17985165 | 17986901 |
| chr2 | 18397820 | 18398968 |

|      |          |          |
|------|----------|----------|
| chr2 | 18477816 | 18478643 |
| chr2 | 18529354 | 18531577 |
| chr2 | 18609882 | 18612540 |
| chr2 | 18773617 | 18775083 |
| chr2 | 19292767 | 19294169 |
| chr2 | 19502407 | 19503400 |
| chr2 | 19578604 | 19580253 |
| chr2 | 20440784 | 20442067 |
| chr2 | 20701136 | 20702282 |
| chr2 | 21414189 | 21415271 |
| chr2 | 22086764 | 22087537 |
| chr2 | 22477054 | 22479792 |
| chr2 | 23010967 | 23012551 |
| chr2 | 24616719 | 24619089 |
| chr2 | 24773587 | 24775484 |
| chr2 | 24817059 | 24819047 |
| chr2 | 24980699 | 24982797 |
| chr2 | 25035429 | 25038188 |
| chr2 | 25065610 | 25067403 |
| chr2 | 25079178 | 25080732 |
| chr2 | 25116835 | 25119662 |
| chr2 | 25187269 | 25189070 |
| chr2 | 25226810 | 25229141 |
| chr2 | 25315347 | 25317231 |
| chr2 | 25355786 | 25358671 |
| chr2 | 25429779 | 25431391 |
| chr2 | 25463067 | 25465139 |
| chr2 | 25561921 | 25563236 |
| chr2 | 25732649 | 25734073 |
| chr2 | 25993542 | 25996881 |
| chr2 | 26091963 | 26093928 |
| chr2 | 26206257 | 26208783 |
| chr2 | 26243979 | 26245878 |
| chr2 | 26299427 | 26302197 |
| chr2 | 26314788 | 26317312 |
| chr2 | 26358741 | 26360723 |
| chr2 | 26441076 | 26443651 |
| chr2 | 26458401 | 26460689 |
| chr2 | 26489338 | 26492279 |
| chr2 | 26494578 | 26496522 |
| chr2 | 26757548 | 26759573 |
| chr2 | 26770884 | 26773066 |
| chr2 | 28229247 | 28230956 |

|      |          |          |
|------|----------|----------|
| chr2 | 28322535 | 28324861 |
| chr2 | 28334444 | 28335604 |
| chr2 | 28437842 | 28439406 |
| chr2 | 28495968 | 28497730 |
| chr2 | 28554731 | 28556480 |
| chr2 | 28695063 | 28697078 |
| chr2 | 29160468 | 29161796 |
| chr2 | 29201948 | 29203361 |
| chr2 | 29391455 | 29394100 |
| chr2 | 29474813 | 29476723 |
| chr2 | 29601161 | 29603895 |
| chr2 | 29642846 | 29644424 |
| chr2 | 29681774 | 29683551 |
| chr2 | 29744216 | 29747016 |
| chr2 | 29903366 | 29905452 |
| chr2 | 29917051 | 29919206 |
| chr2 | 29921318 | 29923381 |
| chr2 | 29932435 | 29934315 |
| chr2 | 30032715 | 30034808 |
| chr2 | 30092221 | 30094340 |
| chr2 | 30140419 | 30143076 |
| chr2 | 30247450 | 30249214 |
| chr2 | 30270631 | 30272365 |
| chr2 | 30329050 | 30330423 |
| chr2 | 30402139 | 30403347 |
| chr2 | 30431805 | 30433570 |
| chr2 | 30571617 | 30574531 |
| chr2 | 30633858 | 30635973 |
| chr2 | 30682697 | 30684818 |
| chr2 | 30736052 | 30737597 |
| chr2 | 30822434 | 30824495 |
| chr2 | 30990396 | 30991713 |
| chr2 | 31007150 | 31008513 |
| chr2 | 31100244 | 31103397 |
| chr2 | 31324224 | 31326833 |
| chr2 | 31525086 | 31527004 |
| chr2 | 31542728 | 31544924 |
| chr2 | 31654950 | 31657855 |
| chr2 | 31739384 | 31741526 |
| chr2 | 31814979 | 31818124 |
| chr2 | 31933217 | 31936303 |
| chr2 | 31964485 | 31966650 |
| chr2 | 32016681 | 32018746 |

|      |          |          |
|------|----------|----------|
| chr2 | 32091239 | 32093050 |
| chr2 | 32203179 | 32207075 |
| chr2 | 32249957 | 32253162 |
| chr2 | 32364660 | 32366701 |
| chr2 | 32469835 | 32471247 |
| chr2 | 32483309 | 32485824 |
| chr2 | 32509982 | 32512034 |
| chr2 | 32548705 | 32550874 |
| chr2 | 32554996 | 32556901 |
| chr2 | 32630153 | 32632247 |
| chr2 | 32796408 | 32797665 |
| chr2 | 32816326 | 32819094 |
| chr2 | 32861631 | 32863178 |
| chr2 | 33337821 | 33338801 |
| chr2 | 33344192 | 33346351 |
| chr2 | 33470934 | 33473934 |
| chr2 | 33520506 | 33523978 |
| chr2 | 33681936 | 33683667 |
| chr2 | 33731111 | 33733021 |
| chr2 | 33821578 | 33823014 |
| chr2 | 34225866 | 34227508 |
| chr2 | 34227899 | 34229332 |
| chr2 | 34262137 | 34263618 |
| chr2 | 34493886 | 34495952 |
| chr2 | 34657478 | 34658724 |
| chr2 | 34681131 | 34682861 |
| chr2 | 34725817 | 34727260 |
| chr2 | 34964055 | 34965774 |
| chr2 | 35055273 | 35057426 |
| chr2 | 35301062 | 35304171 |
| chr2 | 35834381 | 35836207 |
| chr2 | 35904130 | 35905419 |
| chr2 | 37285805 | 37287615 |
| chr2 | 37297840 | 37299523 |
| chr2 | 37557442 | 37558727 |
| chr2 | 37908308 | 37909631 |
| chr2 | 38141853 | 38143295 |
| chr2 | 38203293 | 38204781 |
| chr2 | 38251998 | 38254006 |
| chr2 | 38498607 | 38499947 |
| chr2 | 38830707 | 38833145 |
| chr2 | 38859395 | 38861575 |
| chr2 | 39081253 | 39082203 |

|      |          |          |
|------|----------|----------|
| chr2 | 39102149 | 39102892 |
| chr2 | 39276181 | 39276713 |
| chr2 | 39547196 | 39548017 |
| chr2 | 39871640 | 39872699 |
| chr2 | 39908814 | 39909595 |
| chr2 | 42554375 | 42555055 |
| chr2 | 43263835 | 43264509 |
| chr2 | 43776347 | 43777049 |
| chr2 | 44843803 | 44845171 |
| chr2 | 44856800 | 44858288 |
| chr2 | 45384296 | 45385289 |
| chr2 | 46746359 | 46746851 |
| chr2 | 48669633 | 48670797 |
| chr2 | 49219298 | 49220668 |
| chr2 | 49307269 | 49308407 |
| chr2 | 49336711 | 49337424 |
| chr2 | 49921393 | 49922762 |
| chr2 | 50151462 | 50152539 |
| chr2 | 50542357 | 50543378 |
| chr2 | 51403651 | 51405066 |
| chr2 | 51522686 | 51523997 |
| chr2 | 51927508 | 51929417 |
| chr2 | 52474897 | 52475715 |
| chr2 | 53049613 | 53051789 |
| chr2 | 53664327 | 53664845 |
| chr2 | 53778025 | 53778483 |
| chr2 | 53916839 | 53917695 |
| chr2 | 54218850 | 54220144 |
| chr2 | 56707342 | 56708261 |
| chr2 | 56954176 | 56955647 |
| chr2 | 57083164 | 57084758 |
| chr2 | 57235486 | 57236158 |
| chr2 | 59223779 | 59225180 |
| chr2 | 59962331 | 59963602 |
| chr2 | 60047157 | 60048697 |
| chr2 | 60247849 | 60250865 |
| chr2 | 60252062 | 60252971 |
| chr2 | 60531085 | 60533593 |
| chr2 | 61016196 | 61017163 |
| chr2 | 61493719 | 61495710 |
| chr2 | 61648979 | 61651088 |
| chr2 | 61653080 | 61654697 |
| chr2 | 61748290 | 61749503 |

|      |          |          |
|------|----------|----------|
| chr2 | 62656273 | 62657142 |
| chr2 | 63212220 | 63212912 |
| chr2 | 63234879 | 63235758 |
| chr2 | 63444334 | 63445428 |
| chr2 | 63768957 | 63769704 |
| chr2 | 63935661 | 63936920 |
| chr2 | 64149911 | 64151037 |
| chr2 | 65287012 | 65288105 |
| chr2 | 65612740 | 65613533 |
| chr2 | 65879566 | 65880504 |
| chr2 | 65961682 | 65962915 |
| chr2 | 66094266 | 66095381 |
| chr2 | 66143691 | 66144454 |
| chr2 | 67019414 | 67020080 |
| chr2 | 68399832 | 68400338 |
| chr2 | 68698544 | 68700660 |
| chr2 | 68966093 | 68967459 |
| chr2 | 69423116 | 69424764 |
| chr2 | 69429601 | 69431208 |
| chr2 | 69477800 | 69479090 |
| chr2 | 69550729 | 69552013 |
| chr2 | 69560460 | 69561895 |
| chr2 | 69698963 | 69700255 |
| chr2 | 69734938 | 69736840 |
| chr2 | 70131905 | 70133242 |
| chr2 | 70313651 | 70315775 |
| chr2 | 70499217 | 70500259 |
| chr2 | 70662555 | 70663553 |
| chr2 | 70892918 | 70894759 |
| chr2 | 71049272 | 71050525 |
| chr2 | 71204930 | 71205952 |
| chr2 | 71226842 | 71228354 |
| chr2 | 71290299 | 71292439 |
| chr2 | 71490268 | 71491646 |
| chr2 | 71546887 | 71547851 |
| chr2 | 71625060 | 71626349 |
| chr2 | 71643668 | 71644923 |
| chr2 | 71912681 | 71913576 |
| chr2 | 72232842 | 72234147 |
| chr2 | 72313717 | 72315112 |
| chr2 | 72367330 | 72368806 |
| chr2 | 72816411 | 72817441 |
| chr2 | 72817919 | 72819446 |

|      |          |          |
|------|----------|----------|
| chr2 | 72891892 | 72893309 |
| chr2 | 73110684 | 73112972 |
| chr2 | 73223705 | 73225414 |
| chr2 | 73351618 | 73353311 |
| chr2 | 73613248 | 73613910 |
| chr2 | 73729709 | 73731514 |
| chr2 | 74587126 | 74589082 |
| chr2 | 75496546 | 75499035 |
| chr2 | 75541455 | 75543863 |
| chr2 | 75669441 | 75671119 |
| chr2 | 75797669 | 75799422 |
| chr2 | 75887605 | 75888532 |
| chr2 | 76197966 | 76199078 |
| chr2 | 76207634 | 76208965 |
| chr2 | 77213186 | 77214291 |
| chr2 | 77443711 | 77444304 |
| chr2 | 77783527 | 77784665 |
| chr2 | 78456782 | 78457396 |
| chr2 | 79776352 | 79777949 |
| chr2 | 80035535 | 80036871 |
| chr2 | 80478159 | 80479885 |
| chr2 | 80845857 | 80847225 |
| chr2 | 81550982 | 81551870 |
| chr2 | 82335815 | 82336546 |
| chr2 | 82755822 | 82757106 |
| chr2 | 82783561 | 82784384 |
| chr2 | 83253400 | 83254619 |
| chr2 | 83269851 | 83270485 |
| chr2 | 83484082 | 83485414 |
| chr2 | 83532217 | 83533765 |
| chr2 | 83652344 | 83653419 |
| chr2 | 83926810 | 83928310 |
| chr2 | 84034605 | 84035509 |
| chr2 | 84510112 | 84511331 |
| chr2 | 84517666 | 84519223 |
| chr2 | 84581493 | 84584976 |
| chr2 | 84666424 | 84668147 |
| chr2 | 84679498 | 84681381 |
| chr2 | 84925021 | 84925805 |
| chr2 | 87746230 | 87746923 |
| chr2 | 88510412 | 88511058 |
| chr2 | 88551350 | 88552010 |
| chr2 | 89558365 | 89559187 |



|      |           |           |
|------|-----------|-----------|
| chr2 | 89927295  | 89928169  |
| chr2 | 90088930  | 90089618  |
| chr2 | 90314695  | 90315915  |
| chr2 | 90519035  | 90520382  |
| chr2 | 90584389  | 90586816  |
| chr2 | 90686863  | 90688334  |
| chr2 | 90728878  | 90730967  |
| chr2 | 90744169  | 90745276  |
| chr2 | 90780400  | 90781679  |
| chr2 | 90884720  | 90886745  |
| chr2 | 90893469  | 90895549  |
| chr2 | 91042177  | 91043583  |
| chr2 | 91104300  | 91106552  |
| chr2 | 91475104  | 91476798  |
| chr2 | 91549943  | 91551819  |
| chr2 | 91898022  | 91900892  |
| chr2 | 92273182  | 92275080  |
| chr2 | 92452586  | 92455298  |
| chr2 | 92580345  | 92583451  |
| chr2 | 92812155  | 92815437  |
| chr2 | 93708525  | 93710561  |
| chr2 | 94018128  | 94019475  |
| chr2 | 94245981  | 94247826  |
| chr2 | 94512437  | 94513506  |
| chr2 | 94731164  | 94731928  |
| chr2 | 95194973  | 95195685  |
| chr2 | 95774592  | 95775274  |
| chr2 | 95960147  | 95960909  |
| chr2 | 96121749  | 96122816  |
| chr2 | 98036171  | 98036883  |
| chr2 | 98147325  | 98147954  |
| chr2 | 98268887  | 98269440  |
| chr2 | 99146195  | 99147130  |
| chr2 | 99265583  | 99266526  |
| chr2 | 100743501 | 100744176 |
| chr2 | 101321205 | 101322083 |
| chr2 | 101468703 | 101469474 |
| chr2 | 101655451 | 101656349 |
| chr2 | 101671041 | 101672288 |
| chr2 | 101725495 | 101726928 |
| chr2 | 102239601 | 102241700 |
| chr2 | 102912991 | 102914327 |
| chr2 | 103263004 | 103264579 |

|      |           |           |
|------|-----------|-----------|
| chr2 | 103275643 | 103277269 |
| chr2 | 103600674 | 103602065 |
| chr2 | 103635608 | 103638322 |
| chr2 | 103731014 | 103732155 |
| chr2 | 103867455 | 103869184 |
| chr2 | 104091979 | 104093844 |
| chr2 | 104333172 | 104335076 |
| chr2 | 104396519 | 104397773 |
| chr2 | 104429720 | 104431634 |
| chr2 | 104551464 | 104553448 |
| chr2 | 104655667 | 104657587 |
| chr2 | 105350706 | 105352271 |
| chr2 | 105514095 | 105516545 |
| chr2 | 105743862 | 105745060 |
| chr2 | 105842910 | 105843853 |
| chr2 | 107816618 | 107817365 |
| chr2 | 109730410 | 109732027 |
| chr2 | 110077042 | 110077754 |
| chr2 | 110242392 | 110243538 |
| chr2 | 112079114 | 112080735 |
| chr2 | 112216297 | 112217956 |
| chr2 | 112294728 | 112296066 |
| chr2 | 113589013 | 113590779 |
| chr2 | 113698234 | 113699348 |
| chr2 | 115406735 | 115408345 |
| chr2 | 116455265 | 116456021 |
| chr2 | 116944776 | 116947587 |
| chr2 | 117074796 | 117076215 |
| chr2 | 117167122 | 117169734 |
| chr2 | 117889823 | 117890954 |
| chr2 | 118198454 | 118200326 |
| chr2 | 118213764 | 118215227 |
| chr2 | 118571669 | 118572751 |
| chr2 | 118615171 | 118618345 |
| chr2 | 118638846 | 118640821 |
| chr2 | 118687227 | 118688811 |
| chr2 | 118703003 | 118704152 |
| chr2 | 118721682 | 118723663 |
| chr2 | 118872185 | 118873821 |
| chr2 | 118981788 | 118983198 |
| chr2 | 118992684 | 118994133 |
| chr2 | 119062005 | 119064968 |
| chr2 | 119095134 | 119097197 |

|      |           |           |
|------|-----------|-----------|
| chr2 | 119302393 | 119304590 |
| chr2 | 119419604 | 119420699 |
| chr2 | 119443328 | 119445221 |
| chr2 | 119612694 | 119614255 |
| chr2 | 119697896 | 119699843 |
| chr2 | 120070240 | 120071740 |
| chr2 | 120229126 | 120230607 |
| chr2 | 120388557 | 120389992 |
| chr2 | 120434555 | 120435953 |
| chr2 | 120556424 | 120558112 |
| chr2 | 120795463 | 120796947 |
| chr2 | 120802429 | 120803963 |
| chr2 | 121096433 | 121097894 |
| chr2 | 121113928 | 121116226 |
| chr2 | 121281941 | 121283597 |
| chr2 | 121781292 | 121782974 |
| chr2 | 121943438 | 121945222 |
| chr2 | 122455706 | 122457487 |
| chr2 | 123616070 | 123617013 |
| chr2 | 124948575 | 124950031 |
| chr2 | 125072872 | 125074636 |
| chr2 | 125236984 | 125238412 |
| chr2 | 125498312 | 125499765 |
| chr2 | 125510003 | 125511608 |
| chr2 | 125607936 | 125608902 |
| chr2 | 125684016 | 125685718 |
| chr2 | 125691228 | 125692804 |
| chr2 | 125977483 | 125978742 |
| chr2 | 126064504 | 126065017 |
| chr2 | 126104945 | 126106121 |
| chr2 | 126377947 | 126379532 |
| chr2 | 126499730 | 126502530 |
| chr2 | 126605503 | 126606659 |
| chr2 | 126829948 | 126830649 |
| chr2 | 127072514 | 127074832 |
| chr2 | 127095282 | 127097309 |
| chr2 | 127187693 | 127190414 |
| chr2 | 127250103 | 127252042 |
| chr2 | 127306720 | 127309352 |
| chr2 | 127364379 | 127367862 |
| chr2 | 127412119 | 127413735 |
| chr2 | 127617622 | 127618807 |
| chr2 | 128036820 | 128038507 |

|      |           |           |
|------|-----------|-----------|
| chr2 | 128237471 | 128239437 |
| chr2 | 128512351 | 128514249 |
| chr2 | 128642782 | 128645233 |
| chr2 | 128792364 | 128794316 |
| chr2 | 128926463 | 128927804 |
| chr2 | 128954759 | 128956357 |
| chr2 | 129023391 | 129025019 |
| chr2 | 129049846 | 129051723 |
| chr2 | 129163567 | 129164650 |
| chr2 | 130098796 | 130101260 |
| chr2 | 130109183 | 130110596 |
| chr2 | 130248914 | 130251199 |
| chr2 | 130388575 | 130390580 |
| chr2 | 130664585 | 130666587 |
| chr2 | 130731347 | 130733234 |
| chr2 | 130921640 | 130923213 |
| chr2 | 131000074 | 131001080 |
| chr2 | 131630361 | 131631818 |
| chr2 | 132055538 | 132056508 |
| chr2 | 132078023 | 132079626 |
| chr2 | 132088387 | 132090415 |
| chr2 | 132420038 | 132421531 |
| chr2 | 132512161 | 132513531 |
| chr2 | 134468937 | 134470260 |
| chr2 | 135337474 | 135338286 |
| chr2 | 136538675 | 136540324 |
| chr2 | 136716207 | 136718433 |
| chr2 | 136939175 | 136944257 |
| chr2 | 138220879 | 138221745 |
| chr2 | 140063127 | 140064087 |
| chr2 | 140365658 | 140366314 |
| chr2 | 140928524 | 140929247 |
| chr2 | 141731053 | 141731751 |
| chr2 | 142772072 | 142772587 |
| chr2 | 143550938 | 143552011 |
| chr2 | 143687930 | 143689266 |
| chr2 | 144095641 | 144097347 |
| chr2 | 144120556 | 144122088 |
| chr2 | 144380695 | 144382464 |
| chr2 | 144425399 | 144426880 |
| chr2 | 144955478 | 144956288 |
| chr2 | 145728647 | 145729917 |
| chr2 | 145993723 | 145995213 |

|      |           |           |
|------|-----------|-----------|
| chr2 | 147187180 | 147189035 |
| chr2 | 147696522 | 147697457 |
| chr2 | 148220549 | 148222364 |
| chr2 | 148285060 | 148286476 |
| chr2 | 148502936 | 148504134 |
| chr2 | 148531931 | 148533381 |
| chr2 | 148804234 | 148804936 |
| chr2 | 150325955 | 150326748 |
| chr2 | 150729865 | 150731148 |
| chr2 | 150875473 | 150876116 |
| chr2 | 151318901 | 151320733 |
| chr2 | 151918437 | 151920530 |
| chr2 | 151939831 | 151942458 |
| chr2 | 152001996 | 152003918 |
| chr2 | 152051332 | 152053564 |
| chr2 | 152216439 | 152217622 |
| chr2 | 152223791 | 152225430 |
| chr2 | 152239288 | 152241752 |
| chr2 | 152494702 | 152496550 |
| chr2 | 152531407 | 152534322 |
| chr2 | 152856621 | 152859075 |
| chr2 | 152986600 | 152988189 |
| chr2 | 153170783 | 153171988 |
| chr2 | 153474047 | 153476612 |
| chr2 | 153912825 | 153914057 |
| chr2 | 154251526 | 154254524 |
| chr2 | 154377103 | 154379198 |
| chr2 | 154438171 | 154440464 |
| chr2 | 154479811 | 154481561 |
| chr2 | 154482209 | 154483582 |
| chr2 | 154615950 | 154617460 |
| chr2 | 154958581 | 154960209 |
| chr2 | 155061702 | 155063005 |
| chr2 | 155182490 | 155183782 |
| chr2 | 155517300 | 155518754 |
| chr2 | 155563453 | 155564316 |
| chr2 | 155755069 | 155756446 |
| chr2 | 155781630 | 155783364 |
| chr2 | 155860402 | 155862208 |
| chr2 | 155936448 | 155938053 |
| chr2 | 155968827 | 155970685 |
| chr2 | 156004723 | 156007266 |
| chr2 | 156137343 | 156138953 |

|      |           |           |
|------|-----------|-----------|
| chr2 | 156599900 | 156601864 |
| chr2 | 156664477 | 156667736 |
| chr2 | 156816764 | 156819060 |
| chr2 | 156845607 | 156847541 |
| chr2 | 156960044 | 156961279 |
| chr2 | 157029862 | 157031050 |
| chr2 | 157103875 | 157106089 |
| chr2 | 157385490 | 157386508 |
| chr2 | 157752960 | 157754577 |
| chr2 | 157755093 | 157757109 |
| chr2 | 157853349 | 157855343 |
| chr2 | 158185916 | 158188101 |
| chr2 | 158201007 | 158203702 |
| chr2 | 158336260 | 158338045 |
| chr2 | 158439161 | 158441223 |
| chr2 | 158450292 | 158451608 |
| chr2 | 158619622 | 158621517 |
| chr2 | 160406463 | 160407645 |
| chr2 | 160408663 | 160409768 |
| chr2 | 160470899 | 160472927 |
| chr2 | 160934067 | 160935812 |
| chr2 | 162756602 | 162757707 |
| chr2 | 162879929 | 162882015 |
| chr2 | 162893540 | 162894954 |
| chr2 | 162944658 | 162946160 |
| chr2 | 163200444 | 163203099 |
| chr2 | 163297447 | 163299279 |
| chr2 | 163470105 | 163471388 |
| chr2 | 163649388 | 163651131 |
| chr2 | 163724977 | 163726471 |
| chr2 | 163895703 | 163897741 |
| chr2 | 164158871 | 164159927 |
| chr2 | 164218293 | 164219469 |
| chr2 | 164286234 | 164287417 |
| chr2 | 164322552 | 164323684 |
| chr2 | 164594889 | 164596380 |
| chr2 | 164648040 | 164649727 |
| chr2 | 164703717 | 164705989 |
| chr2 | 164735508 | 164738088 |
| chr2 | 164859248 | 164861066 |
| chr2 | 164941049 | 164942782 |
| chr2 | 165212680 | 165214253 |
| chr2 | 165292150 | 165293815 |

|      |           |           |
|------|-----------|-----------|
| chr2 | 165318076 | 165319344 |
| chr2 | 165388107 | 165390030 |
| chr2 | 165595931 | 165597826 |
| chr2 | 165624478 | 165625745 |
| chr2 | 165704086 | 165706546 |
| chr2 | 165723913 | 165725400 |
| chr2 | 165786692 | 165788268 |
| chr2 | 165817551 | 165819426 |
| chr2 | 166018852 | 166020140 |
| chr2 | 166104898 | 166106048 |
| chr2 | 166414161 | 166416099 |
| chr2 | 166592688 | 166593909 |
| chr2 | 166611426 | 166612990 |
| chr2 | 166618754 | 166620178 |
| chr2 | 166630417 | 166632175 |
| chr2 | 166716818 | 166718099 |
| chr2 | 166730850 | 166732752 |
| chr2 | 167012847 | 167015033 |
| chr2 | 167246058 | 167248206 |
| chr2 | 167327665 | 167330273 |
| chr2 | 167414010 | 167415629 |
| chr2 | 167456439 | 167458287 |
| chr2 | 167927656 | 167931020 |
| chr2 | 167937177 | 167938299 |
| chr2 | 167941816 | 167944121 |
| chr2 | 167952885 | 167955205 |
| chr2 | 167979222 | 167982437 |
| chr2 | 168029954 | 168033952 |
| chr2 | 168054738 | 168057552 |
| chr2 | 168093465 | 168094954 |
| chr2 | 168306070 | 168307558 |
| chr2 | 168426072 | 168428098 |
| chr2 | 168494790 | 168496933 |
| chr2 | 168559057 | 168560515 |
| chr2 | 168565870 | 168567285 |
| chr2 | 168589892 | 168593060 |
| chr2 | 168605273 | 168606685 |
| chr2 | 168624236 | 168625869 |
| chr2 | 168665016 | 168666351 |
| chr2 | 168670871 | 168674363 |
| chr2 | 168786832 | 168788689 |
| chr2 | 169446370 | 169447972 |
| chr2 | 169586617 | 169588396 |

|      |           |           |
|------|-----------|-----------|
| chr2 | 169663387 | 169665401 |
| chr2 | 169715237 | 169716789 |
| chr2 | 169786972 | 169787971 |
| chr2 | 169919392 | 169921057 |
| chr2 | 170182170 | 170183777 |
| chr2 | 170336388 | 170337744 |
| chr2 | 170351949 | 170354087 |
| chr2 | 171831599 | 171832941 |
| chr2 | 172124590 | 172126257 |
| chr2 | 172195105 | 172197175 |
| chr2 | 172248456 | 172250063 |
| chr2 | 172344827 | 172347511 |
| chr2 | 172373999 | 172377453 |
| chr2 | 172650548 | 172652115 |
| chr2 | 172804928 | 172806233 |
| chr2 | 172943699 | 172946291 |
| chr2 | 173115540 | 173117486 |
| chr2 | 173483990 | 173486133 |
| chr2 | 173935850 | 173937626 |
| chr2 | 174109914 | 174112646 |
| chr2 | 174119563 | 174122435 |
| chr2 | 174123508 | 174126087 |
| chr2 | 174140173 | 174142047 |
| chr2 | 174159748 | 174160941 |
| chr2 | 174240499 | 174241923 |
| chr2 | 174288655 | 174290595 |
| chr2 | 177961592 | 177962310 |
| chr2 | 178141319 | 178143485 |
| chr2 | 178147435 | 178149643 |
| chr2 | 179711417 | 179712196 |
| chr2 | 179776235 | 179778384 |
| chr2 | 179838027 | 179840453 |
| chr2 | 179852250 | 179855162 |
| chr2 | 179953390 | 179957894 |
| chr2 | 179959342 | 179960989 |
| chr2 | 180316770 | 180318095 |
| chr2 | 180435819 | 180437853 |
| chr2 | 180443284 | 180446153 |
| chr2 | 180461175 | 180463797 |
| chr2 | 180510583 | 180512395 |
| chr2 | 180654863 | 180656684 |
| chr2 | 180868086 | 180871203 |
| chr2 | 180921285 | 180923249 |



|      |           |           |
|------|-----------|-----------|
| chr2 | 181021438 | 181023181 |
| chr2 | 181227556 | 181229489 |
| chr2 | 181253952 | 181256571 |
| chr2 | 181314912 | 181317759 |
| chr2 | 181326147 | 181328024 |
| chr2 | 181430930 | 181432823 |
| chr3 | 6137070   | 6137964   |
| chr3 | 6849310   | 6850353   |
| chr3 | 7082373   | 7083282   |
| chr3 | 7216593   | 7217710   |
| chr3 | 7310865   | 7311530   |
| chr3 | 7365939   | 7367468   |
| chr3 | 7909885   | 7910723   |
| chr3 | 8451322   | 8452198   |
| chr3 | 8805437   | 8806335   |
| chr3 | 8923071   | 8924225   |
| chr3 | 9032938   | 9034845   |
| chr3 | 9081610   | 9083053   |
| chr3 | 9968221   | 9969371   |
| chr3 | 10011676  | 10014156  |
| chr3 | 10168165  | 10168723  |
| chr3 | 10350302  | 10351688  |
| chr3 | 10439335  | 10440590  |
| chr3 | 10789633  | 10790446  |
| chr3 | 11639246  | 11639964  |
| chr3 | 11851642  | 11852531  |
| chr3 | 12230095  | 12230757  |
| chr3 | 14578286  | 14579425  |
| chr3 | 14610427  | 14611802  |
| chr3 | 15028195  | 15028842  |
| chr3 | 15828675  | 15829321  |
| chr3 | 16082663  | 16084484  |
| chr3 | 17881135  | 17881845  |
| chr3 | 18142685  | 18144068  |
| chr3 | 18330952  | 18331653  |
| chr3 | 18622945  | 18623599  |
| chr3 | 19380855  | 19382536  |
| chr3 | 19923504  | 19925215  |
| chr3 | 20732092  | 20732836  |
| chr3 | 21164936  | 21166132  |
| chr3 | 22206106  | 22207092  |
| chr3 | 23251662  | 23252843  |
| chr3 | 24867341  | 24868202  |

|      |          |          |
|------|----------|----------|
| chr3 | 24883398 | 24883977 |
| chr3 | 26011947 | 26013171 |
| chr3 | 26869154 | 26870717 |
| chr3 | 27051871 | 27053323 |
| chr3 | 27601683 | 27604475 |
| chr3 | 27609271 | 27610592 |
| chr3 | 28412010 | 28413144 |
| chr3 | 28703345 | 28705160 |
| chr3 | 29771330 | 29772066 |
| chr3 | 29930051 | 29931180 |
| chr3 | 30500560 | 30502593 |
| chr3 | 30556984 | 30558552 |
| chr3 | 30691011 | 30693180 |
| chr3 | 30867222 | 30869102 |
| chr3 | 30893941 | 30895189 |
| chr3 | 31123049 | 31124574 |
| chr3 | 31800843 | 31802336 |
| chr3 | 32240042 | 32240874 |
| chr3 | 32408496 | 32410550 |
| chr3 | 32427877 | 32429014 |
| chr3 | 32634531 | 32637105 |
| chr3 | 32715968 | 32717835 |
| chr3 | 32882224 | 32883459 |
| chr3 | 33666241 | 33667426 |
| chr3 | 33698392 | 33700196 |
| chr3 | 33979135 | 33980743 |
| chr3 | 34540342 | 34542025 |
| chr3 | 34547143 | 34550697 |
| chr3 | 34561384 | 34563982 |
| chr3 | 34792656 | 34794574 |
| chr3 | 35029865 | 35031302 |
| chr3 | 35371528 | 35372638 |
| chr3 | 35899032 | 35899724 |
| chr3 | 36229284 | 36230119 |
| chr3 | 36469620 | 36471510 |
| chr3 | 36765768 | 36766999 |
| chr3 | 36961835 | 36963480 |
| chr3 | 37317808 | 37319986 |
| chr3 | 37567206 | 37568587 |
| chr3 | 37646406 | 37647585 |
| chr3 | 39088366 | 39088962 |
| chr3 | 39142410 | 39143208 |
| chr3 | 40113744 | 40114880 |

|      |          |          |
|------|----------|----------|
| chr3 | 40429830 | 40431145 |
| chr3 | 40439204 | 40440093 |
| chr3 | 40512259 | 40513529 |
| chr3 | 40603495 | 40605054 |
| chr3 | 40885613 | 40888085 |
| chr3 | 40927070 | 40928425 |
| chr3 | 41226795 | 41228142 |
| chr3 | 41359105 | 41362171 |
| chr3 | 41367438 | 41368104 |
| chr3 | 42526418 | 42527099 |
| chr3 | 43362012 | 43362883 |
| chr3 | 44468871 | 44470058 |
| chr3 | 44661322 | 44662121 |
| chr3 | 45065211 | 45065733 |
| chr3 | 45151592 | 45152471 |
| chr3 | 45905323 | 45906218 |
| chr3 | 46001712 | 46002875 |
| chr3 | 50960193 | 50961642 |
| chr3 | 51079784 | 51082019 |
| chr3 | 51164447 | 51165362 |
| chr3 | 51199903 | 51201324 |
| chr3 | 51211777 | 51213698 |
| chr3 | 51218902 | 51221265 |
| chr3 | 51286821 | 51289082 |
| chr3 | 51343520 | 51344958 |
| chr3 | 51363481 | 51365827 |
| chr3 | 52071334 | 52073634 |
| chr3 | 52204587 | 52205914 |
| chr3 | 52240506 | 52241889 |
| chr3 | 52574661 | 52576108 |
| chr3 | 52770779 | 52771789 |
| chr3 | 52820179 | 52821488 |
| chr3 | 53281869 | 53284531 |
| chr3 | 53525495 | 53526297 |
| chr3 | 53666948 | 53668241 |
| chr3 | 54120994 | 54122211 |
| chr3 | 54436366 | 54439357 |
| chr3 | 54496153 | 54497619 |
| chr3 | 54538200 | 54540081 |
| chr3 | 54589743 | 54590838 |
| chr3 | 54610739 | 54612796 |
| chr3 | 54719238 | 54720717 |
| chr3 | 54915308 | 54916945 |

|      |          |          |
|------|----------|----------|
| chr3 | 54985314 | 54987133 |
| chr3 | 55413849 | 55415136 |
| chr3 | 55873138 | 55874028 |
| chr3 | 55939994 | 55940844 |
| chr3 | 55987241 | 55988334 |
| chr3 | 56317190 | 56317909 |
| chr3 | 56707349 | 56708185 |
| chr3 | 57649777 | 57652254 |
| chr3 | 58081728 | 58082919 |
| chr3 | 58218207 | 58221573 |
| chr3 | 58328707 | 58330743 |
| chr3 | 58379452 | 58381415 |
| chr3 | 58565849 | 58567209 |
| chr3 | 58808561 | 58811959 |
| chr3 | 59204323 | 59205176 |
| chr3 | 60534512 | 60535689 |
| chr3 | 60581840 | 60582428 |
| chr3 | 60703147 | 60703913 |
| chr3 | 61247941 | 61248886 |
| chr3 | 61446451 | 61447207 |
| chr3 | 62009634 | 62010224 |
| chr3 | 62310246 | 62311333 |
| chr3 | 62346645 | 62347261 |
| chr3 | 62377179 | 62377702 |
| chr3 | 62683227 | 62683861 |
| chr3 | 62798347 | 62799493 |
| chr3 | 62884826 | 62886289 |
| chr3 | 62998301 | 62998992 |
| chr3 | 63480380 | 63481447 |
| chr3 | 63732362 | 63733677 |
| chr3 | 63767521 | 63769106 |
| chr3 | 65195660 | 65196859 |
| chr3 | 65760323 | 65763164 |
| chr3 | 66036875 | 66038014 |
| chr3 | 66439745 | 66440954 |
| chr3 | 66473635 | 66474277 |
| chr3 | 66705680 | 66706691 |
| chr3 | 67177699 | 67179004 |
| chr3 | 67345272 | 67345831 |
| chr3 | 67590045 | 67591016 |
| chr3 | 67930405 | 67931986 |
| chr3 | 68297089 | 68300122 |
| chr3 | 68375898 | 68377288 |

|      |          |          |
|------|----------|----------|
| chr3 | 68673008 | 68675117 |
| chr3 | 68808169 | 68810527 |
| chr3 | 68847599 | 68850178 |
| chr3 | 69819220 | 69820833 |
| chr3 | 70142410 | 70143431 |
| chr3 | 75759651 | 75761288 |
| chr3 | 75803680 | 75804813 |
| chr3 | 76760886 | 76761527 |
| chr3 | 77037385 | 77037936 |
| chr3 | 79431951 | 79433781 |
| chr3 | 79769512 | 79770508 |
| chr3 | 80372753 | 80373786 |
| chr3 | 81427204 | 81428098 |
| chr3 | 81877365 | 81878980 |
| chr3 | 82161494 | 82162808 |
| chr3 | 82855442 | 82856896 |
| chr3 | 83048721 | 83049255 |
| chr3 | 83593013 | 83594831 |
| chr3 | 83770904 | 83771983 |
| chr3 | 83959178 | 83959984 |
| chr3 | 85221421 | 85222115 |
| chr3 | 85377412 | 85378826 |
| chr3 | 85945352 | 85947599 |
| chr3 | 86027236 | 86029487 |
| chr3 | 86211778 | 86213349 |
| chr3 | 86754184 | 86755614 |
| chr3 | 86954406 | 86956652 |
| chr3 | 86975867 | 86979359 |
| chr3 | 87687851 | 87690197 |
| chr3 | 87709622 | 87712400 |
| chr3 | 87714481 | 87715589 |
| chr3 | 87722632 | 87724213 |
| chr3 | 87755401 | 87757120 |
| chr3 | 87846400 | 87847620 |
| chr3 | 87861454 | 87863235 |
| chr3 | 87885414 | 87887034 |
| chr3 | 88025683 | 88027216 |
| chr3 | 88050799 | 88053331 |
| chr3 | 88099957 | 88102287 |
| chr3 | 88138917 | 88141269 |
| chr3 | 88213005 | 88215549 |
| chr3 | 88228056 | 88229553 |
| chr3 | 88285893 | 88289518 |

|      |          |          |
|------|----------|----------|
| chr3 | 88355950 | 88358542 |
| chr3 | 88406186 | 88406974 |
| chr3 | 88424611 | 88426713 |
| chr3 | 88449603 | 88452026 |
| chr3 | 88488666 | 88491028 |
| chr3 | 88520444 | 88521502 |
| chr3 | 88716965 | 88718484 |
| chr3 | 88752922 | 88755444 |
| chr3 | 88939769 | 88941679 |
| chr3 | 88968034 | 88969871 |
| chr3 | 88985316 | 88988442 |
| chr3 | 89006527 | 89007649 |
| chr3 | 89017162 | 89018925 |
| chr3 | 89152323 | 89155016 |
| chr3 | 89233880 | 89235519 |
| chr3 | 89323594 | 89324741 |
| chr3 | 89518566 | 89519838 |
| chr3 | 89606707 | 89608189 |
| chr3 | 89634074 | 89636073 |
| chr3 | 89646806 | 89647953 |
| chr3 | 89689335 | 89690877 |
| chr3 | 89766189 | 89768323 |
| chr3 | 89855971 | 89858018 |
| chr3 | 89882586 | 89884754 |
| chr3 | 89907294 | 89908641 |
| chr3 | 90016657 | 90018432 |
| chr3 | 90035065 | 90036738 |
| chr3 | 90057611 | 90059372 |
| chr3 | 90192191 | 90195015 |
| chr3 | 90236628 | 90238509 |
| chr3 | 90249861 | 90251474 |
| chr3 | 90254401 | 90256578 |
| chr3 | 90279652 | 90280664 |
| chr3 | 90294156 | 90295380 |
| chr3 | 90312040 | 90313987 |
| chr3 | 90773566 | 90774509 |
| chr3 | 92443883 | 92444561 |
| chr3 | 92799721 | 92800502 |
| chr3 | 92853856 | 92854705 |
| chr3 | 93251041 | 93252000 |
| chr3 | 93294897 | 93295542 |
| chr3 | 93324093 | 93325798 |
| chr3 | 93457945 | 93458662 |

|      |           |           |
|------|-----------|-----------|
| chr3 | 94079765  | 94081057  |
| chr3 | 94246866  | 94248520  |
| chr3 | 94385122  | 94386990  |
| chr3 | 94641963  | 94642859  |
| chr3 | 94690005  | 94691265  |
| chr3 | 94817736  | 94820932  |
| chr3 | 94845668  | 94846969  |
| chr3 | 94909785  | 94911233  |
| chr3 | 94943141  | 94945009  |
| chr3 | 95020894  | 95022921  |
| chr3 | 95118117  | 95120454  |
| chr3 | 95237424  | 95239066  |
| chr3 | 95427849  | 95429973  |
| chr3 | 95461535  | 95464292  |
| chr3 | 95504768  | 95506443  |
| chr3 | 95558201  | 95559311  |
| chr3 | 95621597  | 95624205  |
| chr3 | 95674357  | 95675692  |
| chr3 | 95696879  | 95698655  |
| chr3 | 95732119  | 95734719  |
| chr3 | 95975681  | 95977582  |
| chr3 | 96022844  | 96025988  |
| chr3 | 96065763  | 96067666  |
| chr3 | 96071921  | 96074371  |
| chr3 | 96132136  | 96133620  |
| chr3 | 96375328  | 96377025  |
| chr3 | 96379199  | 96381765  |
| chr3 | 96400389  | 96403423  |
| chr3 | 96432908  | 96434445  |
| chr3 | 96438608  | 96440732  |
| chr3 | 96496408  | 96497739  |
| chr3 | 96499736  | 96502167  |
| chr3 | 96531034  | 96532970  |
| chr3 | 96962619  | 96963571  |
| chr3 | 97038607  | 97039380  |
| chr3 | 97461596  | 97463427  |
| chr3 | 97570709  | 97573091  |
| chr3 | 97985871  | 97986615  |
| chr3 | 98943923  | 98945976  |
| chr3 | 99155492  | 99156822  |
| chr3 | 99935990  | 99937268  |
| chr3 | 100489840 | 100491136 |
| chr3 | 101167043 | 101167985 |

|      |           |           |
|------|-----------|-----------|
| chr3 | 101993327 | 101995367 |
| chr3 | 102739034 | 102740674 |
| chr3 | 102823997 | 102825966 |
| chr3 | 102974709 | 102976630 |
| chr3 | 103388887 | 103390116 |
| chr3 | 103594405 | 103596441 |
| chr3 | 103612617 | 103613979 |
| chr3 | 103717684 | 103719605 |
| chr3 | 103926572 | 103927322 |
| chr3 | 104244921 | 104246877 |
| chr3 | 104314922 | 104316475 |
| chr3 | 104441534 | 104443710 |
| chr3 | 104578668 | 104579784 |
| chr3 | 104620414 | 104621820 |
| chr3 | 104666501 | 104668724 |
| chr3 | 105489450 | 105490951 |
| chr3 | 105761277 | 105763375 |
| chr3 | 106087676 | 106088466 |
| chr3 | 106524303 | 106525609 |
| chr3 | 106837833 | 106840482 |
| chr3 | 107081436 | 107082433 |
| chr3 | 107134671 | 107137383 |
| chr3 | 107260845 | 107264051 |
| chr3 | 107433629 | 107435124 |
| chr3 | 107498571 | 107500627 |
| chr3 | 108012360 | 108014803 |
| chr3 | 108169389 | 108171028 |
| chr3 | 108204138 | 108205929 |
| chr3 | 108642344 | 108643840 |
| chr3 | 108681437 | 108682954 |
| chr3 | 108713274 | 108715531 |
| chr3 | 108742004 | 108744137 |
| chr3 | 109799673 | 109800247 |
| chr3 | 110052617 | 110054758 |
| chr3 | 110485713 | 110486827 |
| chr3 | 115634901 | 115636223 |
| chr3 | 115709622 | 115711287 |
| chr3 | 115739587 | 115741114 |
| chr3 | 115953940 | 115956283 |
| chr3 | 116125565 | 116128345 |
| chr3 | 116215621 | 116217075 |
| chr3 | 116297154 | 116299019 |
| chr3 | 116300073 | 116301270 |



|      |           |           |
|------|-----------|-----------|
| chr3 | 116325243 | 116326594 |
| chr3 | 116364305 | 116366112 |
| chr3 | 116476257 | 116477842 |
| chr3 | 116820519 | 116821769 |
| chr3 | 117277527 | 117278662 |
| chr3 | 117571012 | 117572612 |
| chr3 | 117944834 | 117946027 |
| chr3 | 118416457 | 118417069 |
| chr3 | 119355788 | 119357108 |
| chr3 | 119485170 | 119486959 |
| chr3 | 119686522 | 119687194 |
| chr3 | 120525559 | 120526942 |
| chr3 | 120640746 | 120641872 |
| chr3 | 120873995 | 120875045 |
| chr3 | 120909439 | 120911276 |
| chr3 | 121261510 | 121263614 |
| chr3 | 121425668 | 121427784 |
| chr3 | 121517226 | 121518822 |
| chr3 | 121976312 | 121978014 |
| chr3 | 122341235 | 122344376 |
| chr3 | 122686448 | 122688175 |
| chr3 | 122967203 | 122968686 |
| chr3 | 123210345 | 123212680 |
| chr3 | 123299405 | 123300958 |
| chr3 | 126298836 | 126301231 |
| chr3 | 126771461 | 126772658 |
| chr3 | 126864168 | 126865815 |
| chr3 | 126872494 | 126873670 |
| chr3 | 127331059 | 127332285 |
| chr3 | 127418354 | 127419555 |
| chr3 | 127612612 | 127613372 |
| chr3 | 129243834 | 129245145 |
| chr3 | 129533663 | 129534882 |
| chr3 | 130432522 | 130434470 |
| chr3 | 130813803 | 130815853 |
| chr3 | 130881373 | 130883363 |
| chr3 | 130973921 | 130975568 |
| chr3 | 131018382 | 131019504 |
| chr3 | 131614426 | 131615051 |
| chr3 | 132075457 | 132076083 |
| chr3 | 132418787 | 132419847 |
| chr3 | 132521327 | 132522866 |
| chr3 | 132753505 | 132755514 |

|      |           |           |
|------|-----------|-----------|
| chr3 | 132864712 | 132865801 |
| chr3 | 132972239 | 132974083 |
| chr3 | 133206247 | 133208153 |
| chr3 | 133305005 | 133305942 |
| chr3 | 134945219 | 134946834 |
| chr3 | 135085282 | 135086888 |
| chr3 | 135100487 | 135102648 |
| chr3 | 135168270 | 135169529 |
| chr3 | 135244255 | 135245987 |
| chr3 | 137489826 | 137491252 |
| chr3 | 137806057 | 137807881 |
| chr3 | 138104938 | 138106749 |
| chr3 | 138151685 | 138153045 |
| chr3 | 138189095 | 138191170 |
| chr3 | 138559527 | 138560747 |
| chr3 | 139044005 | 139044977 |
| chr3 | 140873549 | 140875350 |
| chr3 | 141244487 | 141245284 |
| chr3 | 141827454 | 141829066 |
| chr3 | 142427715 | 142428895 |
| chr3 | 142761698 | 142763205 |
| chr3 | 143827346 | 143828772 |
| chr3 | 144232151 | 144234327 |
| chr3 | 144490851 | 144491744 |
| chr3 | 144781235 | 144782357 |
| chr3 | 145294906 | 145297302 |
| chr3 | 145421169 | 145423084 |
| chr3 | 145600622 | 145601814 |
| chr3 | 145650133 | 145652235 |
| chr3 | 145717650 | 145718571 |
| chr3 | 145987324 | 145988765 |
| chr3 | 146112955 | 146114374 |
| chr3 | 146162089 | 146163703 |
| chr3 | 146183548 | 146185235 |
| chr3 | 146475071 | 146476695 |
| chr3 | 147116587 | 147117514 |
| chr3 | 148651613 | 148653633 |
| chr3 | 149031706 | 149033031 |
| chr3 | 149146902 | 149148634 |
| chr3 | 149831231 | 149831942 |
| chr3 | 151650843 | 151651908 |
| chr3 | 151697788 | 151698336 |
| chr3 | 151872327 | 151874470 |

|      |           |           |
|------|-----------|-----------|
| chr3 | 152002313 | 152004053 |
| chr3 | 152058579 | 152060365 |
| chr3 | 152329731 | 152331126 |
| chr3 | 152376626 | 152377872 |
| chr3 | 152975892 | 152977222 |
| chr3 | 153606222 | 153608218 |
| chr3 | 154259169 | 154260830 |
| chr3 | 154972854 | 154973917 |
| chr3 | 155625291 | 155626084 |
| chr3 | 157196701 | 157198178 |
| chr3 | 157608983 | 157611488 |
| chr3 | 157694062 | 157695184 |
| chr3 | 157698718 | 157700102 |
| chr3 | 157764453 | 157765520 |
| chr4 | 4719152   | 4720801   |
| chr4 | 5642081   | 5642717   |
| chr4 | 6117601   | 6119461   |
| chr4 | 7464760   | 7465686   |
| chr4 | 8118355   | 8119251   |
| chr4 | 8294558   | 8296142   |
| chr4 | 8573868   | 8575353   |
| chr4 | 8792675   | 8794071   |
| chr4 | 9062642   | 9064217   |
| chr4 | 9982836   | 9983675   |
| chr4 | 10621295  | 10622314  |
| chr4 | 10786017  | 10788159  |
| chr4 | 10800874  | 10802761  |
| chr4 | 10941077  | 10943508  |
| chr4 | 11002429  | 11004044  |
| chr4 | 11180089  | 11182224  |
| chr4 | 11248398  | 11249895  |
| chr4 | 11412619  | 11414059  |
| chr4 | 11648823  | 11650161  |
| chr4 | 12014022  | 12015450  |
| chr4 | 12016111  | 12016909  |
| chr4 | 12066995  | 12067755  |
| chr4 | 12252846  | 12253440  |
| chr4 | 12357783  | 12358688  |
| chr4 | 12394340  | 12394940  |
| chr4 | 13223330  | 13224057  |
| chr4 | 14005991  | 14007370  |
| chr4 | 14752571  | 14754140  |
| chr4 | 14790891  | 14792524  |

|      |          |          |
|------|----------|----------|
| chr4 | 14980683 | 14981981 |
| chr4 | 15105570 | 15107074 |
| chr4 | 15250958 | 15252530 |
| chr4 | 16089838 | 16091490 |
| chr4 | 16124644 | 16125363 |
| chr4 | 16472070 | 16473047 |
| chr4 | 17335814 | 17336315 |
| chr4 | 17497890 | 17498656 |
| chr4 | 18248944 | 18249613 |
| chr4 | 18895623 | 18896265 |
| chr4 | 19501836 | 19503468 |
| chr4 | 19677484 | 19678625 |
| chr4 | 19693668 | 19694497 |
| chr4 | 20287600 | 20288178 |
| chr4 | 20347066 | 20348167 |
| chr4 | 21577990 | 21578763 |
| chr4 | 21654354 | 21655757 |
| chr4 | 21702592 | 21703894 |
| chr4 | 21774150 | 21775967 |
| chr4 | 23579534 | 23580981 |
| chr4 | 25102560 | 25103718 |
| chr4 | 25116129 | 25117047 |
| chr4 | 25208344 | 25209434 |
| chr4 | 26645050 | 26645976 |
| chr4 | 28388113 | 28389042 |
| chr4 | 31232563 | 31233637 |
| chr4 | 32701937 | 32702884 |
| chr4 | 32886765 | 32888279 |
| chr4 | 33009569 | 33011267 |
| chr4 | 33333974 | 33336194 |
| chr4 | 34136424 | 34137385 |
| chr4 | 34497442 | 34499140 |
| chr4 | 34561118 | 34562719 |
| chr4 | 34633636 | 34635066 |
| chr4 | 34829853 | 34830785 |
| chr4 | 35172436 | 35174060 |
| chr4 | 36217346 | 36217993 |
| chr4 | 36839735 | 36840980 |
| chr4 | 37078909 | 37079515 |
| chr4 | 37481445 | 37481902 |
| chr4 | 37704081 | 37705275 |
| chr4 | 38696925 | 38697653 |
| chr4 | 40214510 | 40217493 |

|      |          |          |
|------|----------|----------|
| chr4 | 40419508 | 40421761 |
| chr4 | 40800264 | 40802252 |
| chr4 | 40917491 | 40918928 |
| chr4 | 40970231 | 40971795 |
| chr4 | 41001508 | 41002997 |
| chr4 | 41260471 | 41263161 |
| chr4 | 41295643 | 41296768 |
| chr4 | 41443973 | 41447048 |
| chr4 | 41515647 | 41517470 |
| chr4 | 41658816 | 41661827 |
| chr4 | 41669452 | 41670767 |
| chr4 | 42972137 | 42972875 |
| chr4 | 43012066 | 43013548 |
| chr4 | 43071141 | 43072982 |
| chr4 | 43135861 | 43136633 |
| chr4 | 43279667 | 43280477 |
| chr4 | 43520661 | 43523004 |
| chr4 | 43535210 | 43537210 |
| chr4 | 43574486 | 43576070 |
| chr4 | 43668397 | 43670312 |
| chr4 | 43887779 | 43889282 |
| chr4 | 43954633 | 43956585 |
| chr4 | 44078290 | 44079613 |
| chr4 | 44084975 | 44086502 |
| chr4 | 44676168 | 44678022 |
| chr4 | 44971373 | 44972780 |
| chr4 | 44993391 | 44995176 |
| chr4 | 45197077 | 45199340 |
| chr4 | 45332402 | 45334381 |
| chr4 | 45411636 | 45413591 |
| chr4 | 45574472 | 45575423 |
| chr4 | 45838735 | 45840296 |
| chr4 | 46150388 | 46152174 |
| chr4 | 46208380 | 46209929 |
| chr4 | 46355994 | 46358573 |
| chr4 | 46401693 | 46403460 |
| chr4 | 46463208 | 46465055 |
| chr4 | 46465247 | 46466263 |
| chr4 | 46662144 | 46663896 |
| chr4 | 46676401 | 46678121 |
| chr4 | 47438765 | 47440027 |
| chr4 | 47486736 | 47488223 |
| chr4 | 47549144 | 47550207 |

|      |          |          |
|------|----------|----------|
| chr4 | 48055353 | 48056786 |
| chr4 | 48057109 | 48059014 |
| chr4 | 49479750 | 49480587 |
| chr4 | 49533297 | 49534739 |
| chr4 | 49609671 | 49610950 |
| chr4 | 49788536 | 49789446 |
| chr4 | 50025146 | 50026272 |
| chr4 | 50150551 | 50151129 |
| chr4 | 50643635 | 50644387 |
| chr4 | 51667484 | 51668142 |
| chr4 | 52100102 | 52101206 |
| chr4 | 52247318 | 52248070 |
| chr4 | 53071697 | 53073010 |
| chr4 | 53232046 | 53233145 |
| chr4 | 53405590 | 53406348 |
| chr4 | 53680682 | 53681661 |
| chr4 | 54833351 | 54834308 |
| chr4 | 54866851 | 54867773 |
| chr4 | 55017976 | 55019074 |
| chr4 | 55362169 | 55364162 |
| chr4 | 56446414 | 56447096 |
| chr4 | 56877015 | 56878472 |
| chr4 | 56911013 | 56912007 |
| chr4 | 56959202 | 56961364 |
| chr4 | 56975220 | 56976293 |
| chr4 | 57313255 | 57314517 |
| chr4 | 57572831 | 57574080 |
| chr4 | 57702850 | 57704382 |
| chr4 | 57932536 | 57934024 |
| chr4 | 57967812 | 57970574 |
| chr4 | 58085060 | 58086287 |
| chr4 | 58476583 | 58477765 |
| chr4 | 58684333 | 58685210 |
| chr4 | 59047261 | 59049012 |
| chr4 | 59561345 | 59562947 |
| chr4 | 59817950 | 59820027 |
| chr4 | 61869002 | 61870599 |
| chr4 | 62068489 | 62070711 |
| chr4 | 62131322 | 62132337 |
| chr4 | 62185390 | 62186627 |
| chr4 | 62320845 | 62323122 |
| chr4 | 62695284 | 62696120 |
| chr4 | 63677678 | 63679587 |

|      |          |          |
|------|----------|----------|
| chr4 | 63954650 | 63955638 |
| chr4 | 64087208 | 64088559 |
| chr4 | 64115351 | 64115987 |
| chr4 | 64529253 | 64530280 |
| chr4 | 64651675 | 64652595 |
| chr4 | 65483953 | 65484717 |
| chr4 | 65731930 | 65732507 |
| chr4 | 65739089 | 65739668 |
| chr4 | 66015685 | 66016443 |
| chr4 | 66298908 | 66299622 |
| chr4 | 66343075 | 66343864 |
| chr4 | 66378565 | 66379721 |
| chr4 | 66435914 | 66436505 |
| chr4 | 69382185 | 69383242 |
| chr4 | 70046876 | 70048213 |
| chr4 | 70070299 | 70072080 |
| chr4 | 71536695 | 71537306 |
| chr4 | 71860605 | 71863103 |
| chr4 | 73435608 | 73437413 |
| chr4 | 73896957 | 73898801 |
| chr4 | 75577035 | 75577576 |
| chr4 | 78505586 | 78506476 |
| chr4 | 78788333 | 78789514 |
| chr4 | 80556285 | 80558492 |
| chr4 | 80795068 | 80796460 |
| chr4 | 81554439 | 81554997 |
| chr4 | 81629134 | 81630164 |
| chr4 | 82050049 | 82050902 |
| chr4 | 82857487 | 82858701 |
| chr4 | 82969018 | 82970569 |
| chr4 | 83062809 | 83064604 |
| chr4 | 83178841 | 83180025 |
| chr4 | 84529196 | 84531297 |
| chr4 | 85408256 | 85409049 |
| chr4 | 85537028 | 85537933 |
| chr4 | 85685725 | 85686332 |
| chr4 | 85872489 | 85873203 |
| chr4 | 85987590 | 85989776 |
| chr4 | 86220494 | 86222732 |
| chr4 | 86394027 | 86395476 |
| chr4 | 86502248 | 86503908 |
| chr4 | 86575720 | 86577422 |
| chr4 | 87933602 | 87934705 |

|      |           |           |
|------|-----------|-----------|
| chr4 | 88006206  | 88007129  |
| chr4 | 88021255  | 88022490  |
| chr4 | 88712384  | 88713062  |
| chr4 | 89354461  | 89356340  |
| chr4 | 93000905  | 93002833  |
| chr4 | 93370032  | 93370957  |
| chr4 | 93447527  | 93448087  |
| chr4 | 93790754  | 93791715  |
| chr4 | 94418901  | 94419692  |
| chr4 | 94511851  | 94512503  |
| chr4 | 94645187  | 94646243  |
| chr4 | 94716544  | 94719219  |
| chr4 | 94783783  | 94784618  |
| chr4 | 96363808  | 96365129  |
| chr4 | 97534703  | 97536156  |
| chr4 | 98049355  | 98050209  |
| chr4 | 98588663  | 98591805  |
| chr4 | 98786660  | 98788374  |
| chr4 | 99008528  | 99010037  |
| chr4 | 99302672  | 99304287  |
| chr4 | 99322314  | 99324127  |
| chr4 | 99601753  | 99603148  |
| chr4 | 100531480 | 100532791 |
| chr4 | 100765172 | 100766620 |
| chr4 | 101029114 | 101030521 |
| chr4 | 101168797 | 101170775 |
| chr4 | 101319303 | 101321146 |
| chr4 | 101656954 | 101658134 |
| chr4 | 102431384 | 102432997 |
| chr4 | 102791287 | 102792940 |
| chr4 | 102886400 | 102888278 |
| chr4 | 102945053 | 102946309 |
| chr4 | 103052273 | 103052869 |
| chr4 | 103918607 | 103919152 |
| chr4 | 104781501 | 104783565 |
| chr4 | 104829777 | 104831381 |
| chr4 | 104947866 | 104949607 |
| chr4 | 104950207 | 104951686 |
| chr4 | 104971599 | 104972912 |
| chr4 | 105266137 | 105266958 |
| chr4 | 105298005 | 105299163 |
| chr4 | 105407776 | 105408380 |
| chr4 | 105987915 | 105990337 |



|      |           |           |
|------|-----------|-----------|
| chr4 | 106421377 | 106423414 |
| chr4 | 106738412 | 106740489 |
| chr4 | 106802926 | 106804096 |
| chr4 | 106850627 | 106852434 |
| chr4 | 107040066 | 107041424 |
| chr4 | 107106446 | 107108912 |
| chr4 | 107355056 | 107357513 |
| chr4 | 107358183 | 107359392 |
| chr4 | 107551849 | 107552927 |
| chr4 | 107561762 | 107563149 |
| chr4 | 107595050 | 107596547 |
| chr4 | 107889690 | 107891037 |
| chr4 | 107999922 | 108001639 |
| chr4 | 108010148 | 108011601 |
| chr4 | 108132295 | 108134064 |
| chr4 | 108505370 | 108507242 |
| chr4 | 108520121 | 108521611 |
| chr4 | 108873853 | 108875301 |
| chr4 | 109078636 | 109080866 |
| chr4 | 109086936 | 109087735 |
| chr4 | 109348563 | 109350258 |
| chr4 | 109651957 | 109653875 |
| chr4 | 109776463 | 109777356 |
| chr4 | 109994380 | 109995645 |
| chr4 | 110023772 | 110024980 |
| chr4 | 110069924 | 110070893 |
| chr4 | 110390450 | 110391097 |
| chr4 | 114579322 | 114582171 |
| chr4 | 114671831 | 114673391 |
| chr4 | 114728655 | 114730835 |
| chr4 | 115023723 | 115024554 |
| chr4 | 115409929 | 115411030 |
| chr4 | 115456596 | 115458199 |
| chr4 | 115725664 | 115726837 |
| chr4 | 115746593 | 115750053 |
| chr4 | 116228790 | 116231276 |
| chr4 | 116298957 | 116300814 |
| chr4 | 116323351 | 116324512 |
| chr4 | 116380420 | 116381994 |
| chr4 | 116478994 | 116480776 |
| chr4 | 116549057 | 116551111 |
| chr4 | 116666044 | 116669066 |
| chr4 | 116781446 | 116783434 |

|      |           |           |
|------|-----------|-----------|
| chr4 | 116827017 | 116829603 |
| chr4 | 117039132 | 117041166 |
| chr4 | 117061914 | 117063956 |
| chr4 | 117087188 | 117088786 |
| chr4 | 117222366 | 117223590 |
| chr4 | 117585600 | 117588372 |
| chr4 | 117806396 | 117808181 |
| chr4 | 118252653 | 118254996 |
| chr4 | 118679923 | 118682297 |
| chr4 | 118691361 | 118693215 |
| chr4 | 118780422 | 118782540 |
| chr4 | 118792976 | 118794928 |
| chr4 | 118813383 | 118814658 |
| chr4 | 118904397 | 118906771 |
| chr4 | 118965047 | 118968191 |
| chr4 | 118992316 | 118993689 |
| chr4 | 119094386 | 119096185 |
| chr4 | 119211404 | 119213350 |
| chr4 | 119888345 | 119890050 |
| chr4 | 120006369 | 120007490 |
| chr4 | 120077333 | 120078949 |
| chr4 | 120497346 | 120499246 |
| chr4 | 120886660 | 120888532 |
| chr4 | 122512939 | 122514516 |
| chr4 | 122693335 | 122694534 |
| chr4 | 122781527 | 122783585 |
| chr4 | 122793150 | 122794204 |
| chr4 | 122816124 | 122818042 |
| chr4 | 123362942 | 123364612 |
| chr4 | 123426901 | 123428025 |
| chr4 | 123581825 | 123583070 |
| chr4 | 123669529 | 123670358 |
| chr4 | 124391519 | 124392697 |
| chr4 | 124428083 | 124429654 |
| chr4 | 124478719 | 124480665 |
| chr4 | 124538541 | 124540512 |
| chr4 | 124612824 | 124615046 |
| chr4 | 124761456 | 124763270 |
| chr4 | 125547954 | 125550227 |
| chr4 | 125613627 | 125615151 |
| chr4 | 125723746 | 125725435 |
| chr4 | 125773594 | 125774731 |
| chr4 | 125779686 | 125782235 |

|      |           |           |
|------|-----------|-----------|
| chr4 | 125824586 | 125827225 |
| chr4 | 125878707 | 125880994 |
| chr4 | 125927992 | 125929815 |
| chr4 | 125997785 | 126000133 |
| chr4 | 126106167 | 126107326 |
| chr4 | 126144751 | 126146505 |
| chr4 | 126278699 | 126280506 |
| chr4 | 126429248 | 126432043 |
| chr4 | 126644360 | 126646499 |
| chr4 | 126675104 | 126676240 |
| chr4 | 126698055 | 126700084 |
| chr4 | 126875144 | 126877144 |
| chr4 | 127001081 | 127003985 |
| chr4 | 127040999 | 127043374 |
| chr4 | 127062808 | 127064599 |
| chr4 | 127095775 | 127097971 |
| chr4 | 128505097 | 128505951 |
| chr4 | 128669892 | 128671924 |
| chr4 | 128734629 | 128736394 |
| chr4 | 128795157 | 128796535 |
| chr4 | 128865985 | 128867813 |
| chr4 | 129011687 | 129013581 |
| chr4 | 129083095 | 129084757 |
| chr4 | 129109313 | 129110828 |
| chr4 | 129137787 | 129139943 |
| chr4 | 129167568 | 129169548 |
| chr4 | 129218416 | 129220568 |
| chr4 | 129232088 | 129234720 |
| chr4 | 129246986 | 129247933 |
| chr4 | 129261922 | 129263302 |
| chr4 | 129276986 | 129279096 |
| chr4 | 129348999 | 129350424 |
| chr4 | 129471480 | 129473881 |
| chr4 | 129487757 | 129489003 |
| chr4 | 129497708 | 129498855 |
| chr4 | 129566806 | 129568086 |
| chr4 | 129681907 | 129685786 |
| chr4 | 129783914 | 129785591 |
| chr4 | 129984209 | 129987072 |
| chr4 | 130036258 | 130038013 |
| chr4 | 130195909 | 130197647 |
| chr4 | 130218367 | 130220524 |
| chr4 | 130652452 | 130654009 |

|      |           |           |
|------|-----------|-----------|
| chr4 | 130694035 | 130696185 |
| chr4 | 130795884 | 130797853 |
| chr4 | 131428908 | 131431020 |
| chr4 | 131455465 | 131457453 |
| chr4 | 131767076 | 131768677 |
| chr4 | 131829465 | 131830964 |
| chr4 | 131863715 | 131865960 |
| chr4 | 131977338 | 131978984 |
| chr4 | 132088478 | 132089936 |
| chr4 | 132090996 | 132092323 |
| chr4 | 132323324 | 132325380 |
| chr4 | 132398236 | 132400154 |
| chr4 | 132534351 | 132535418 |
| chr4 | 132566354 | 132568338 |
| chr4 | 132663785 | 132666621 |
| chr4 | 132685294 | 132687459 |
| chr4 | 132755576 | 132757951 |
| chr4 | 132784643 | 132786438 |
| chr4 | 132832756 | 132834444 |
| chr4 | 132848748 | 132850298 |
| chr4 | 132924761 | 132926798 |
| chr4 | 133130012 | 133131894 |
| chr4 | 133211519 | 133213351 |
| chr4 | 133226860 | 133229261 |
| chr4 | 133307315 | 133309617 |
| chr4 | 133309965 | 133311228 |
| chr4 | 133311389 | 133313943 |
| chr4 | 133368712 | 133371126 |
| chr4 | 133522724 | 133525712 |
| chr4 | 133657655 | 133659315 |
| chr4 | 133670741 | 133676901 |
| chr4 | 133799070 | 133802005 |
| chr4 | 133805090 | 133806772 |
| chr4 | 133823611 | 133825313 |
| chr4 | 133841792 | 133844658 |
| chr4 | 133870853 | 133872803 |
| chr4 | 133898197 | 133900488 |
| chr4 | 134009379 | 134010681 |
| chr4 | 134023178 | 134025219 |
| chr4 | 134027870 | 134029524 |
| chr4 | 134089749 | 134092219 |
| chr4 | 134237298 | 134238919 |
| chr4 | 134431664 | 134432544 |

|      |           |           |
|------|-----------|-----------|
| chr4 | 134478673 | 134480789 |
| chr4 | 134486452 | 134488162 |
| chr4 | 134579193 | 134580783 |
| chr4 | 134757443 | 134758874 |
| chr4 | 134761230 | 134762749 |
| chr4 | 134799497 | 134801497 |
| chr4 | 134855662 | 134857563 |
| chr4 | 134908013 | 134910180 |
| chr4 | 134974966 | 134977244 |
| chr4 | 135049599 | 135051735 |
| chr4 | 135061335 | 135062638 |
| chr4 | 135062671 | 135064408 |
| chr4 | 135080563 | 135082614 |
| chr4 | 135264063 | 135266037 |
| chr4 | 135316729 | 135319301 |
| chr4 | 135320304 | 135322614 |
| chr4 | 135384328 | 135385702 |
| chr4 | 135410800 | 135413387 |
| chr4 | 135428903 | 135430728 |
| chr4 | 135501505 | 135503524 |
| chr4 | 135527314 | 135529575 |
| chr4 | 135542310 | 135544157 |
| chr4 | 135576519 | 135578097 |
| chr4 | 135607687 | 135609809 |
| chr4 | 135649800 | 135651461 |
| chr4 | 135803128 | 135805895 |
| chr4 | 135865535 | 135867768 |
| chr4 | 136016974 | 136020392 |
| chr4 | 136157602 | 136159526 |
| chr4 | 136174620 | 136175912 |
| chr4 | 136192306 | 136195669 |
| chr4 | 136326176 | 136329419 |
| chr4 | 136500640 | 136502509 |
| chr4 | 136603586 | 136605851 |
| chr4 | 136660318 | 136661833 |
| chr4 | 136912569 | 136914465 |
| chr4 | 137148955 | 137151562 |
| chr4 | 137236543 | 137238589 |
| chr4 | 137277268 | 137281802 |
| chr4 | 137548477 | 137550397 |
| chr4 | 137674995 | 137676417 |
| chr4 | 137772825 | 137774420 |
| chr4 | 137817781 | 137819397 |

|      |           |           |
|------|-----------|-----------|
| chr4 | 137859579 | 137861312 |
| chr4 | 137950790 | 137953129 |
| chr4 | 137989745 | 137991809 |
| chr4 | 138261790 | 138263703 |
| chr4 | 138414901 | 138416462 |
| chr4 | 138435683 | 138439219 |
| chr4 | 138445665 | 138447843 |
| chr4 | 138528419 | 138530340 |
| chr4 | 138685616 | 138687317 |
| chr4 | 138907607 | 138909154 |
| chr4 | 138935573 | 138937351 |
| chr4 | 139197081 | 139198850 |
| chr4 | 139224582 | 139226304 |
| chr4 | 139279490 | 139280823 |
| chr4 | 139312291 | 139314064 |
| chr4 | 139322731 | 139325353 |
| chr4 | 139484823 | 139486385 |
| chr4 | 139641344 | 139642881 |
| chr4 | 139643549 | 139645967 |
| chr4 | 139696687 | 139698429 |
| chr4 | 139784340 | 139786839 |
| chr4 | 139787016 | 139787863 |
| chr4 | 139801189 | 139802745 |
| chr4 | 139956712 | 139959342 |
| chr4 | 139961283 | 139963635 |
| chr4 | 140369648 | 140371178 |
| chr4 | 140516421 | 140518139 |
| chr4 | 140694778 | 140697043 |
| chr4 | 140702745 | 140704840 |
| chr4 | 140809393 | 140811346 |
| chr4 | 140900209 | 140901831 |
| chr4 | 140999531 | 141001624 |
| chr4 | 141028630 | 141032021 |
| chr4 | 141091872 | 141093791 |
| chr4 | 141101006 | 141103265 |
| chr4 | 141114730 | 141116832 |
| chr4 | 141349065 | 141350393 |
| chr4 | 141374242 | 141375789 |
| chr4 | 141430176 | 141431905 |
| chr4 | 141616807 | 141623198 |
| chr4 | 141626226 | 141627907 |
| chr4 | 141638975 | 141641308 |
| chr4 | 142801487 | 142803494 |

|      |           |           |
|------|-----------|-----------|
| chr4 | 142828035 | 142830649 |
| chr4 | 144288575 | 144289212 |
| chr4 | 144783756 | 144785642 |
| chr4 | 147277767 | 147279256 |
| chr4 | 147309038 | 147311344 |
| chr4 | 147411659 | 147413921 |
| chr4 | 147461019 | 147462800 |
| chr4 | 147488771 | 147490730 |
| chr4 | 147566291 | 147568384 |
| chr4 | 147817984 | 147819412 |
| chr4 | 147932053 | 147933305 |
| chr4 | 147964657 | 147966414 |
| chr4 | 147999716 | 148001568 |
| chr4 | 148027877 | 148030025 |
| chr4 | 148059416 | 148061770 |
| chr4 | 148096877 | 148098638 |
| chr4 | 148180560 | 148181784 |
| chr4 | 148247340 | 148249549 |
| chr4 | 148264038 | 148266514 |
| chr4 | 148312140 | 148314264 |
| chr4 | 148472580 | 148474836 |
| chr4 | 148539922 | 148542159 |
| chr4 | 148680072 | 148682683 |
| chr4 | 148800074 | 148801741 |
| chr4 | 148980630 | 148982284 |
| chr4 | 149033464 | 149034890 |
| chr4 | 149183964 | 149185564 |
| chr4 | 149396053 | 149397365 |
| chr4 | 149610363 | 149614906 |
| chr4 | 149640507 | 149642209 |
| chr4 | 149642669 | 149643698 |
| chr4 | 149654643 | 149656499 |
| chr4 | 149896638 | 149898690 |
| chr4 | 150091201 | 150094431 |
| chr4 | 150270059 | 150272258 |
| chr4 | 150659502 | 150660793 |
| chr4 | 150977840 | 150979759 |
| chr4 | 151306728 | 151309085 |
| chr4 | 151362018 | 151364089 |
| chr4 | 151369651 | 151370810 |
| chr4 | 151382502 | 151384428 |
| chr4 | 151400524 | 151402795 |
| chr4 | 151410816 | 151414786 |

|      |           |           |
|------|-----------|-----------|
| chr4 | 151504703 | 151507012 |
| chr4 | 151551171 | 151553855 |
| chr4 | 151656290 | 151658598 |
| chr4 | 151670320 | 151672339 |
| chr4 | 151685323 | 151688044 |
| chr4 | 151698923 | 151700794 |
| chr4 | 151733734 | 151735617 |
| chr4 | 151744555 | 151747254 |
| chr4 | 151750564 | 151754273 |
| chr4 | 152372116 | 152374315 |
| chr4 | 152610448 | 152611886 |
| chr4 | 152788803 | 152792295 |
| chr4 | 152920892 | 152922898 |
| chr4 | 153224570 | 153226125 |
| chr4 | 153235648 | 153237553 |
| chr4 | 153330422 | 153332300 |
| chr4 | 153384766 | 153387592 |
| chr4 | 153534024 | 153535799 |
| chr4 | 153702324 | 153704334 |
| chr4 | 153891282 | 153892888 |
| chr4 | 154008604 | 154010542 |
| chr4 | 154137307 | 154139167 |
| chr4 | 154333269 | 154336460 |
| chr4 | 154337135 | 154339072 |
| chr4 | 154459515 | 154461873 |
| chr4 | 154547100 | 154548634 |
| chr4 | 154623200 | 154625261 |
| chr4 | 154734969 | 154736455 |
| chr4 | 154864537 | 154867315 |
| chr4 | 154975291 | 154976888 |
| chr4 | 155067860 | 155070182 |
| chr4 | 155078427 | 155080304 |
| chr4 | 155176794 | 155178758 |
| chr4 | 155185827 | 155187539 |
| chr4 | 155214755 | 155216930 |
| chr4 | 155263689 | 155266915 |
| chr4 | 155316843 | 155318907 |
| chr4 | 155365151 | 155368137 |
| chr4 | 155432588 | 155435044 |
| chr4 | 155483506 | 155484916 |
| chr4 | 155609548 | 155610963 |
| chr5 | 3595007   | 3597293   |
| chr5 | 3802160   | 3803989   |



|      |          |          |
|------|----------|----------|
| chr5 | 4008118  | 4009511  |
| chr5 | 4600750  | 4601662  |
| chr5 | 5558670  | 5559847  |
| chr5 | 6402284  | 6402955  |
| chr5 | 6799328  | 6800262  |
| chr5 | 7084668  | 7085858  |
| chr5 | 7499134  | 7499769  |
| chr5 | 8056193  | 8057607  |
| chr5 | 8266017  | 8266963  |
| chr5 | 8621945  | 8623274  |
| chr5 | 8711118  | 8712998  |
| chr5 | 9048730  | 9049657  |
| chr5 | 9100182  | 9102147  |
| chr5 | 9160669  | 9162828  |
| chr5 | 12737818 | 12739088 |
| chr5 | 12894455 | 12895763 |
| chr5 | 13106034 | 13106880 |
| chr5 | 13455316 | 13456046 |
| chr5 | 14180223 | 14181484 |
| chr5 | 14514455 | 14515872 |
| chr5 | 15176446 | 15177239 |
| chr5 | 15440041 | 15441805 |
| chr5 | 15578610 | 15579506 |
| chr5 | 16009937 | 16010493 |
| chr5 | 16547062 | 16547924 |
| chr5 | 16729610 | 16730900 |
| chr5 | 16957923 | 16958628 |
| chr5 | 18731548 | 18734172 |
| chr5 | 19468428 | 19469012 |
| chr5 | 19925775 | 19926419 |
| chr5 | 20206750 | 20208790 |
| chr5 | 20387630 | 20388775 |
| chr5 | 20456428 | 20458561 |
| chr5 | 20930462 | 20931673 |
| chr5 | 21065686 | 21067271 |
| chr5 | 21206748 | 21208559 |
| chr5 | 21241929 | 21243924 |
| chr5 | 21289781 | 21291277 |
| chr5 | 21291785 | 21293217 |
| chr5 | 21315564 | 21317277 |
| chr5 | 22923798 | 22925239 |
| chr5 | 22938200 | 22941619 |
| chr5 | 23217857 | 23218843 |

|      |          |          |
|------|----------|----------|
| chr5 | 23219044 | 23220312 |
| chr5 | 23424989 | 23426450 |
| chr5 | 23446850 | 23447455 |
| chr5 | 23535655 | 23536912 |
| chr5 | 23829247 | 23831981 |
| chr5 | 23899177 | 23901378 |
| chr5 | 23928875 | 23930328 |
| chr5 | 23949743 | 23951982 |
| chr5 | 23952588 | 23954316 |
| chr5 | 24092124 | 24094015 |
| chr5 | 24179377 | 24180830 |
| chr5 | 24190620 | 24192117 |
| chr5 | 24255433 | 24258013 |
| chr5 | 24347115 | 24349884 |
| chr5 | 24531033 | 24532728 |
| chr5 | 24604998 | 24607588 |
| chr5 | 25003408 | 25006358 |
| chr5 | 25034576 | 25036489 |
| chr5 | 25211024 | 25212131 |
| chr5 | 25264991 | 25266875 |
| chr5 | 25274351 | 25275667 |
| chr5 | 26333109 | 26334709 |
| chr5 | 26396592 | 26398333 |
| chr5 | 27621949 | 27623067 |
| chr5 | 28396673 | 28399204 |
| chr5 | 28643027 | 28644759 |
| chr5 | 29503109 | 29503663 |
| chr5 | 29521743 | 29523028 |
| chr5 | 29524977 | 29526552 |
| chr5 | 29682377 | 29683833 |
| chr5 | 29895233 | 29896846 |
| chr5 | 30439782 | 30442480 |
| chr5 | 30480862 | 30482962 |
| chr5 | 30607514 | 30608377 |
| chr5 | 30772104 | 30773798 |
| chr5 | 30923377 | 30925739 |
| chr5 | 31012955 | 31015949 |
| chr5 | 31116191 | 31117988 |
| chr5 | 31170867 | 31173149 |
| chr5 | 31209109 | 31211258 |
| chr5 | 31251141 | 31252913 |
| chr5 | 31261539 | 31263700 |
| chr5 | 31349867 | 31351969 |

|      |          |          |
|------|----------|----------|
| chr5 | 31355824 | 31357912 |
| chr5 | 31396516 | 31398713 |
| chr5 | 31481371 | 31483020 |
| chr5 | 31494589 | 31496752 |
| chr5 | 31503811 | 31505863 |
| chr5 | 31522022 | 31524356 |
| chr5 | 31796531 | 31797837 |
| chr5 | 31828628 | 31830392 |
| chr5 | 31912562 | 31913601 |
| chr5 | 31916040 | 31916968 |
| chr5 | 31999446 | 32001045 |
| chr5 | 32161137 | 32161898 |
| chr5 | 32912466 | 32914589 |
| chr5 | 33015261 | 33016705 |
| chr5 | 33127506 | 33128812 |
| chr5 | 33360285 | 33362664 |
| chr5 | 33444408 | 33446073 |
| chr5 | 33677559 | 33679775 |
| chr5 | 33775133 | 33777642 |
| chr5 | 33876132 | 33880006 |
| chr5 | 33999796 | 34001928 |
| chr5 | 34124198 | 34126354 |
| chr5 | 34163393 | 34164532 |
| chr5 | 34278130 | 34280356 |
| chr5 | 34337615 | 34341535 |
| chr5 | 34390626 | 34391492 |
| chr5 | 34528649 | 34531433 |
| chr5 | 34668724 | 34670766 |
| chr5 | 34678048 | 34680326 |
| chr5 | 34711091 | 34713402 |
| chr5 | 35103300 | 35105921 |
| chr5 | 35447060 | 35449090 |
| chr5 | 35470978 | 35473451 |
| chr5 | 35916954 | 35918191 |
| chr5 | 35994393 | 35996853 |
| chr5 | 36579596 | 36580825 |
| chr5 | 36718286 | 36719758 |
| chr5 | 36806765 | 36808744 |
| chr5 | 36825605 | 36828568 |
| chr5 | 36923709 | 36926080 |
| chr5 | 37187056 | 37188493 |
| chr5 | 37271624 | 37273298 |
| chr5 | 37679187 | 37680622 |

|      |          |          |
|------|----------|----------|
| chr5 | 38611024 | 38612690 |
| chr5 | 38651207 | 38652231 |
| chr5 | 39074543 | 39076894 |
| chr5 | 39228674 | 39229745 |
| chr5 | 40146474 | 40147188 |
| chr5 | 42098054 | 42100254 |
| chr5 | 42526710 | 42527788 |
| chr5 | 42579294 | 42579940 |
| chr5 | 43129722 | 43130411 |
| chr5 | 44052602 | 44054077 |
| chr5 | 44063385 | 44064993 |
| chr5 | 44173382 | 44174442 |
| chr5 | 44616459 | 44617810 |
| chr5 | 44747897 | 44748478 |
| chr5 | 44879855 | 44880449 |
| chr5 | 45884166 | 45885574 |
| chr5 | 45910539 | 45912341 |
| chr5 | 46248154 | 46249673 |
| chr5 | 46792099 | 46792667 |
| chr5 | 47554878 | 47555475 |
| chr5 | 47678586 | 47679226 |
| chr5 | 49035161 | 49035820 |
| chr5 | 49488544 | 49489299 |
| chr5 | 49935764 | 49936623 |
| chr5 | 50710118 | 50711059 |
| chr5 | 51071496 | 51072566 |
| chr5 | 51383488 | 51384118 |
| chr5 | 52505486 | 52506951 |
| chr5 | 52580786 | 52582235 |
| chr5 | 52758623 | 52760497 |
| chr5 | 52861546 | 52863460 |
| chr5 | 53173473 | 53174869 |
| chr5 | 53301683 | 53303078 |
| chr5 | 53657681 | 53659156 |
| chr5 | 53933055 | 53934953 |
| chr5 | 53979977 | 53982687 |
| chr5 | 54138833 | 54139866 |
| chr5 | 56580097 | 56580659 |
| chr5 | 56650741 | 56651500 |
| chr5 | 58108540 | 58112169 |
| chr5 | 58391496 | 58392270 |
| chr5 | 58636248 | 58636985 |
| chr5 | 59115959 | 59116551 |

|      |          |          |
|------|----------|----------|
| chr5 | 59168103 | 59169316 |
| chr5 | 59270769 | 59271426 |
| chr5 | 59330686 | 59331877 |
| chr5 | 59959070 | 59959693 |
| chr5 | 60041125 | 60042143 |
| chr5 | 61042087 | 61043283 |
| chr5 | 61683848 | 61684426 |
| chr5 | 62600328 | 62600923 |
| chr5 | 62618712 | 62619339 |
| chr5 | 62818038 | 62819144 |
| chr5 | 64048090 | 64049021 |
| chr5 | 64315534 | 64317328 |
| chr5 | 64508181 | 64509376 |
| chr5 | 64550198 | 64551958 |
| chr5 | 64821188 | 64824309 |
| chr5 | 65188045 | 65189218 |
| chr5 | 65781404 | 65783401 |
| chr5 | 65882997 | 65885080 |
| chr5 | 65927869 | 65929558 |
| chr5 | 66154110 | 66156367 |
| chr5 | 66262234 | 66263582 |
| chr5 | 66302664 | 66303958 |
| chr5 | 66600598 | 66602204 |
| chr5 | 67497156 | 67498646 |
| chr5 | 67651595 | 67652828 |
| chr5 | 67697767 | 67699349 |
| chr5 | 68496831 | 68497490 |
| chr5 | 70821067 | 70821801 |
| chr5 | 71581052 | 71581762 |
| chr5 | 71710467 | 71711316 |
| chr5 | 71780267 | 71780866 |
| chr5 | 71916572 | 71917369 |
| chr5 | 72222470 | 72223459 |
| chr5 | 72594098 | 72595153 |
| chr5 | 73266764 | 73267782 |
| chr5 | 73304411 | 73307017 |
| chr5 | 73462219 | 73462990 |
| chr5 | 73683796 | 73684810 |
| chr5 | 74038371 | 74039838 |
| chr5 | 74171930 | 74173360 |
| chr5 | 74255221 | 74256796 |
| chr5 | 74463597 | 74465177 |
| chr5 | 74918447 | 74919162 |

|      |          |          |
|------|----------|----------|
| chr5 | 74930974 | 74932201 |
| chr5 | 75551565 | 75553421 |
| chr5 | 75982444 | 75984076 |
| chr5 | 76329470 | 76331527 |
| chr5 | 76612017 | 76614007 |
| chr5 | 76732938 | 76734806 |
| chr5 | 77016866 | 77018880 |
| chr5 | 77086169 | 77087678 |
| chr5 | 77285022 | 77288313 |
| chr5 | 77358052 | 77359399 |
| chr5 | 77379449 | 77381689 |
| chr5 | 77403061 | 77404493 |
| chr5 | 77458648 | 77459989 |
| chr5 | 77693965 | 77696446 |
| chr5 | 77709993 | 77712187 |
| chr5 | 77737792 | 77740003 |
| chr5 | 78051770 | 78052987 |
| chr5 | 78790707 | 78791303 |
| chr5 | 81570516 | 81571343 |
| chr5 | 82052101 | 82053304 |
| chr5 | 82128746 | 82129331 |
| chr5 | 82223301 | 82224351 |
| chr5 | 82472005 | 82472876 |
| chr5 | 83543804 | 83544666 |
| chr5 | 84211915 | 84213543 |
| chr5 | 84807420 | 84808421 |
| chr5 | 85692260 | 85693282 |
| chr5 | 86493928 | 86495117 |
| chr5 | 86798202 | 86798768 |
| chr5 | 87232955 | 87234092 |
| chr5 | 88463072 | 88463701 |
| chr5 | 88974294 | 88975294 |
| chr5 | 88982707 | 88984512 |
| chr5 | 89040956 | 89041992 |
| chr5 | 89616006 | 89616874 |
| chr5 | 89883914 | 89885369 |
| chr5 | 90795480 | 90796252 |
| chr5 | 91247977 | 91248516 |
| chr5 | 92212278 | 92214221 |
| chr5 | 92256083 | 92257359 |
| chr5 | 92391273 | 92392690 |
| chr5 | 92511624 | 92513719 |
| chr5 | 92647006 | 92648459 |

|      |           |           |
|------|-----------|-----------|
| chr5 | 92668321  | 92669492  |
| chr5 | 92863269  | 92864864  |
| chr5 | 93520939  | 93523997  |
| chr5 | 93634821  | 93636031  |
| chr5 | 96590232  | 96591721  |
| chr5 | 96638677  | 96640227  |
| chr5 | 96802362  | 96804534  |
| chr5 | 97655211  | 97656281  |
| chr5 | 97807671  | 97809016  |
| chr5 | 97820260  | 97821644  |
| chr5 | 99344551  | 99345331  |
| chr5 | 100334397 | 100336209 |
| chr5 | 100406333 | 100408929 |
| chr5 | 100467202 | 100469945 |
| chr5 | 100586962 | 100588114 |
| chr5 | 100745474 | 100747775 |
| chr5 | 100857235 | 100859704 |
| chr5 | 100927096 | 100928112 |
| chr5 | 100946616 | 100948377 |
| chr5 | 101226966 | 101228294 |
| chr5 | 101248954 | 101250347 |
| chr5 | 101740942 | 101742066 |
| chr5 | 102116745 | 102118777 |
| chr5 | 102131855 | 102133698 |
| chr5 | 102497878 | 102500071 |
| chr5 | 103813935 | 103814810 |
| chr5 | 103853339 | 103855163 |
| chr5 | 104083850 | 104085833 |
| chr5 | 104226782 | 104227460 |
| chr5 | 104521146 | 104522106 |
| chr5 | 104537277 | 104539847 |
| chr5 | 104887788 | 104889628 |
| chr5 | 104894121 | 104896632 |
| chr5 | 105322986 | 105323739 |
| chr5 | 105844085 | 105844847 |
| chr5 | 106127701 | 106129913 |
| chr5 | 106304207 | 106306589 |
| chr5 | 106452217 | 106452929 |
| chr5 | 106820928 | 106822416 |
| chr5 | 107124253 | 107126396 |
| chr5 | 107354369 | 107356292 |
| chr5 | 107392706 | 107394378 |
| chr5 | 107717213 | 107719356 |

|      |           |           |
|------|-----------|-----------|
| chr5 | 107759490 | 107761075 |
| chr5 | 107865865 | 107867868 |
| chr5 | 108328227 | 108330923 |
| chr5 | 108488830 | 108490788 |
| chr5 | 108494312 | 108495572 |
| chr5 | 108741062 | 108742472 |
| chr5 | 108862294 | 108864292 |
| chr5 | 109057934 | 109059889 |
| chr5 | 109097583 | 109099289 |
| chr5 | 109132111 | 109133286 |
| chr5 | 109984631 | 109987138 |
| chr5 | 110538613 | 110539697 |
| chr5 | 110563568 | 110565520 |
| chr5 | 110896752 | 110898521 |
| chr5 | 110902699 | 110904510 |
| chr5 | 110972312 | 110974579 |
| chr5 | 111081657 | 111083590 |
| chr5 | 111268095 | 111269987 |
| chr5 | 111308142 | 111309482 |
| chr5 | 111560100 | 111561451 |
| chr5 | 111703439 | 111706983 |
| chr5 | 111759020 | 111760927 |
| chr5 | 111831819 | 111832907 |
| chr5 | 111894338 | 111896488 |
| chr5 | 112264823 | 112266740 |
| chr5 | 112553450 | 112556695 |
| chr5 | 112565841 | 112567618 |
| chr5 | 112642681 | 112645608 |
| chr5 | 112656775 | 112658426 |
| chr5 | 112735846 | 112737767 |
| chr5 | 112771061 | 112772798 |
| chr5 | 113249504 | 113250993 |
| chr5 | 113474226 | 113475683 |
| chr5 | 113579754 | 113581370 |
| chr5 | 113773411 | 113774621 |
| chr5 | 113800716 | 113802850 |
| chr5 | 113848734 | 113850934 |
| chr5 | 113941137 | 113942615 |
| chr5 | 114026247 | 114028280 |
| chr5 | 114029555 | 114031315 |
| chr5 | 114080106 | 114082289 |
| chr5 | 114092793 | 114094914 |
| chr5 | 114124387 | 114125681 |



|      |           |           |
|------|-----------|-----------|
| chr5 | 114220501 | 114223623 |
| chr5 | 114267590 | 114270165 |
| chr5 | 114293931 | 114295857 |
| chr5 | 114569710 | 114571744 |
| chr5 | 114580205 | 114582079 |
| chr5 | 114625034 | 114626750 |
| chr5 | 114697651 | 114699810 |
| chr5 | 114806352 | 114807717 |
| chr5 | 114829795 | 114831818 |
| chr5 | 115123254 | 115126899 |
| chr5 | 115140095 | 115142227 |
| chr5 | 115222994 | 115225727 |
| chr5 | 115244599 | 115245797 |
| chr5 | 115263323 | 115264329 |
| chr5 | 115391856 | 115392961 |
| chr5 | 115421832 | 115423586 |
| chr5 | 115460211 | 115462456 |
| chr5 | 115568584 | 115570194 |
| chr5 | 115583479 | 115585183 |
| chr5 | 115607072 | 115609309 |
| chr5 | 115687568 | 115689243 |
| chr5 | 115721552 | 115723785 |
| chr5 | 115729290 | 115730764 |
| chr5 | 115749932 | 115752010 |
| chr5 | 115790511 | 115791903 |
| chr5 | 115798190 | 115799679 |
| chr5 | 115914429 | 115915803 |
| chr5 | 116145858 | 116147296 |
| chr5 | 116227019 | 116228509 |
| chr5 | 116357267 | 116359437 |
| chr5 | 116490127 | 116491479 |
| chr5 | 116629929 | 116631193 |
| chr5 | 116684553 | 116686093 |
| chr5 | 117736144 | 117738511 |
| chr5 | 117743991 | 117745219 |
| chr5 | 117768022 | 117769852 |
| chr5 | 117838002 | 117839510 |
| chr5 | 117931270 | 117932969 |
| chr5 | 118273374 | 118274763 |
| chr5 | 118412401 | 118414219 |
| chr5 | 118426141 | 118428120 |
| chr5 | 118458238 | 118459986 |
| chr5 | 118485940 | 118487752 |

|      |           |           |
|------|-----------|-----------|
| chr5 | 118604279 | 118606028 |
| chr5 | 118771223 | 118773289 |
| chr5 | 118803591 | 118804703 |
| chr5 | 118858384 | 118860305 |
| chr5 | 118884710 | 118887314 |
| chr5 | 119589109 | 119589896 |
| chr5 | 119726340 | 119727486 |
| chr5 | 120046357 | 120047362 |
| chr5 | 120090244 | 120092445 |
| chr5 | 120109761 | 120111350 |
| chr5 | 120117918 | 120123087 |
| chr5 | 120168526 | 120171542 |
| chr5 | 120370349 | 120372166 |
| chr5 | 120427719 | 120429118 |
| chr5 | 120462493 | 120463486 |
| chr5 | 120566075 | 120567470 |
| chr5 | 120906894 | 120908526 |
| chr5 | 120952263 | 120954595 |
| chr5 | 121061879 | 121064394 |
| chr5 | 121159995 | 121161678 |
| chr5 | 121175178 | 121176941 |
| chr5 | 121654237 | 121655726 |
| chr5 | 121669459 | 121671261 |
| chr5 | 121847026 | 121848958 |
| chr5 | 121901369 | 121903563 |
| chr5 | 122317685 | 122320052 |
| chr5 | 122340050 | 122342521 |
| chr5 | 122498738 | 122501044 |
| chr5 | 122520763 | 122523000 |
| chr5 | 122607656 | 122609376 |
| chr5 | 122724421 | 122725921 |
| chr5 | 122803245 | 122805317 |
| chr5 | 122871728 | 122873622 |
| chr5 | 122951041 | 122952268 |
| chr5 | 123092525 | 123094818 |
| chr5 | 123270629 | 123272302 |
| chr5 | 123478906 | 123480601 |
| chr5 | 123584512 | 123592222 |
| chr5 | 123606091 | 123609122 |
| chr5 | 123793488 | 123796984 |
| chr5 | 123818102 | 123820123 |
| chr5 | 123843936 | 123845942 |
| chr5 | 123973095 | 123974955 |

|      |           |           |
|------|-----------|-----------|
| chr5 | 124021922 | 124024114 |
| chr5 | 124169992 | 124171521 |
| chr5 | 124198343 | 124200693 |
| chr5 | 124379898 | 124381167 |
| chr5 | 124525535 | 124528353 |
| chr5 | 124560692 | 124565044 |
| chr5 | 124565893 | 124567469 |
| chr5 | 124800692 | 124804300 |
| chr5 | 124874357 | 124875681 |
| chr5 | 124889547 | 124890832 |
| chr5 | 124932416 | 124934264 |
| chr5 | 125002559 | 125004008 |
| chr5 | 125028206 | 125029770 |
| chr5 | 125048300 | 125049913 |
| chr5 | 125068056 | 125069716 |
| chr5 | 125341641 | 125344074 |
| chr5 | 125636147 | 125641283 |
| chr5 | 125763719 | 125765702 |
| chr5 | 125869170 | 125870677 |
| chr5 | 126342742 | 126343695 |
| chr5 | 127720970 | 127723372 |
| chr5 | 128057886 | 128060101 |
| chr5 | 128096641 | 128098752 |
| chr5 | 128118881 | 128120770 |
| chr5 | 128987380 | 128989482 |
| chr5 | 129032838 | 129034396 |
| chr5 | 129106460 | 129108642 |
| chr5 | 129226075 | 129227186 |
| chr5 | 129287574 | 129289873 |
| chr5 | 129458074 | 129459905 |
| chr5 | 129525103 | 129527435 |
| chr5 | 130005941 | 130008626 |
| chr5 | 130229831 | 130232120 |
| chr5 | 130292397 | 130293925 |
| chr5 | 130362372 | 130363809 |
| chr5 | 130392758 | 130395152 |
| chr5 | 130477655 | 130479588 |
| chr5 | 130504753 | 130506050 |
| chr5 | 130554677 | 130556627 |
| chr5 | 130619601 | 130621435 |
| chr5 | 132013240 | 132014974 |
| chr5 | 133204525 | 133205681 |
| chr5 | 134034756 | 134036122 |

|      |           |           |
|------|-----------|-----------|
| chr5 | 134594060 | 134595498 |
| chr5 | 134651457 | 134653451 |
| chr5 | 134659269 | 134660925 |
| chr5 | 134788956 | 134791983 |
| chr5 | 134896901 | 134899489 |
| chr5 | 134977339 | 134979537 |
| chr5 | 135043737 | 135045774 |
| chr5 | 135114266 | 135115784 |
| chr5 | 135460667 | 135463311 |
| chr5 | 135476025 | 135477735 |
| chr5 | 135517334 | 135518928 |
| chr5 | 135539245 | 135541064 |
| chr5 | 135547703 | 135550533 |
| chr5 | 135582187 | 135584989 |
| chr5 | 135597378 | 135598848 |
| chr5 | 135643671 | 135645670 |
| chr5 | 135662092 | 135664251 |
| chr5 | 135751557 | 135753174 |
| chr5 | 135782337 | 135783532 |
| chr5 | 136019913 | 136022353 |
| chr5 | 136108123 | 136109528 |
| chr5 | 136111573 | 136112950 |
| chr5 | 136208555 | 136211176 |
| chr5 | 136310258 | 136312536 |
| chr5 | 136378513 | 136380802 |
| chr5 | 136409565 | 136411802 |
| chr5 | 136438069 | 136439819 |
| chr5 | 136440676 | 136442682 |
| chr5 | 136455639 | 136457279 |
| chr5 | 136513826 | 136515216 |
| chr5 | 136551881 | 136553368 |
| chr5 | 136564283 | 136565725 |
| chr5 | 136610911 | 136612982 |
| chr5 | 136673739 | 136675348 |
| chr5 | 137041720 | 137044924 |
| chr5 | 137189462 | 137191414 |
| chr5 | 137297571 | 137298363 |
| chr5 | 137461755 | 137463931 |
| chr5 | 137747944 | 137750143 |
| chr5 | 137778745 | 137780741 |
| chr5 | 137873818 | 137875481 |
| chr5 | 137942650 | 137944575 |
| chr5 | 137962249 | 137964926 |

|      |           |           |
|------|-----------|-----------|
| chr5 | 138040995 | 138043109 |
| chr5 | 138181944 | 138183952 |
| chr5 | 138225811 | 138227937 |
| chr5 | 138228298 | 138229972 |
| chr5 | 138596148 | 138597491 |
| chr5 | 138601297 | 138603161 |
| chr5 | 138611906 | 138614533 |
| chr5 | 138627431 | 138629512 |
| chr5 | 138720609 | 138722529 |
| chr5 | 138882367 | 138883570 |
| chr5 | 139059898 | 139061439 |
| chr5 | 139063448 | 139065249 |
| chr5 | 139532342 | 139534964 |
| chr5 | 139625056 | 139627121 |
| chr5 | 140266912 | 140268159 |
| chr5 | 140301518 | 140303073 |
| chr5 | 140424549 | 140427557 |
| chr5 | 140543701 | 140545602 |
| chr5 | 140757454 | 140759736 |
| chr5 | 140806925 | 140809017 |
| chr5 | 140894133 | 140896321 |
| chr5 | 141042020 | 141044731 |
| chr5 | 141086433 | 141089178 |
| chr5 | 141124044 | 141126312 |
| chr5 | 141177539 | 141179487 |
| chr5 | 141382048 | 141383499 |
| chr5 | 142704692 | 142706209 |
| chr5 | 142794840 | 142796645 |
| chr5 | 142876841 | 142878320 |
| chr5 | 143005360 | 143006827 |
| chr5 | 143104017 | 143106815 |
| chr5 | 143581153 | 143584201 |
| chr5 | 143584289 | 143586297 |
| chr5 | 143646410 | 143649066 |
| chr5 | 143655796 | 143657845 |
| chr5 | 143682112 | 143683560 |
| chr5 | 143721182 | 143723325 |
| chr5 | 143723340 | 143726356 |
| chr5 | 143890463 | 143891679 |
| chr5 | 143941555 | 143943658 |
| chr5 | 144165150 | 144166379 |
| chr5 | 144287610 | 144290274 |
| chr5 | 144449176 | 144450468 |

|      |           |           |
|------|-----------|-----------|
| chr5 | 144775264 | 144776160 |
| chr5 | 144860264 | 144861784 |
| chr5 | 145306287 | 145307847 |
| chr5 | 145521706 | 145523101 |
| chr5 | 145844421 | 145845848 |
| chr5 | 145950922 | 145953011 |
| chr5 | 145964575 | 145965845 |
| chr5 | 145975271 | 145976892 |
| chr5 | 147644060 | 147645951 |
| chr5 | 147710102 | 147712110 |
| chr5 | 147740886 | 147742389 |
| chr5 | 147887391 | 147889896 |
| chr5 | 147996680 | 148001122 |
| chr5 | 148219444 | 148220996 |
| chr5 | 148241118 | 148242584 |
| chr5 | 148384192 | 148385662 |
| chr5 | 148462840 | 148463679 |
| chr5 | 148671464 | 148673282 |
| chr5 | 148768493 | 148769896 |
| chr5 | 148838295 | 148840830 |
| chr5 | 149210385 | 149211948 |
| chr5 | 149363486 | 149364933 |
| chr5 | 149460542 | 149461771 |
| chr5 | 149605312 | 149607114 |
| chr5 | 149862708 | 149863643 |
| chr5 | 149864214 | 149865456 |
| chr5 | 149995136 | 149996863 |
| chr5 | 150059000 | 150060808 |
| chr5 | 150241333 | 150243956 |
| chr5 | 150355407 | 150358022 |
| chr5 | 150370170 | 150371536 |
| chr5 | 150399896 | 150400688 |
| chr5 | 150438194 | 150439756 |
| chr5 | 150632957 | 150634668 |
| chr5 | 150831363 | 150833281 |
| chr5 | 151467203 | 151468680 |
| chr5 | 151475929 | 151477467 |
| chr5 | 152170041 | 152172459 |
| chr6 | 3447339   | 3449196   |
| chr6 | 4232034   | 4232682   |
| chr6 | 4550062   | 4552532   |
| chr6 | 4602840   | 4604133   |
| chr6 | 4608605   | 4610148   |

|      |          |          |
|------|----------|----------|
| chr6 | 4697483  | 4699050  |
| chr6 | 5122163  | 5123268  |
| chr6 | 5373184  | 5374039  |
| chr6 | 5475499  | 5476530  |
| chr6 | 5526441  | 5527667  |
| chr6 | 6166274  | 6167699  |
| chr6 | 6239452  | 6240828  |
| chr6 | 6637034  | 6637886  |
| chr6 | 6813294  | 6814611  |
| chr6 | 7519908  | 7520639  |
| chr6 | 7642358  | 7644083  |
| chr6 | 8158724  | 8160041  |
| chr6 | 8208408  | 8210150  |
| chr6 | 8434876  | 8436227  |
| chr6 | 8458777  | 8459860  |
| chr6 | 9552895  | 9554556  |
| chr6 | 12025664 | 12026172 |
| chr6 | 12596501 | 12597088 |
| chr6 | 13557171 | 13559132 |
| chr6 | 13626840 | 13628940 |
| chr6 | 13820982 | 13822024 |
| chr6 | 15634435 | 15635057 |
| chr6 | 15890028 | 15890744 |
| chr6 | 15938117 | 15939037 |
| chr6 | 16340692 | 16341457 |
| chr6 | 16551574 | 16552325 |
| chr6 | 17790052 | 17791217 |
| chr6 | 18712762 | 18713546 |
| chr6 | 18798067 | 18798861 |
| chr6 | 20743254 | 20743803 |
| chr6 | 21164430 | 21167548 |
| chr6 | 21343519 | 21344343 |
| chr6 | 21899041 | 21900504 |
| chr6 | 22074724 | 22075553 |
| chr6 | 23314711 | 23315270 |
| chr6 | 23460490 | 23461665 |
| chr6 | 23624715 | 23625633 |
| chr6 | 24019200 | 24019807 |
| chr6 | 24441526 | 24442130 |
| chr6 | 24476909 | 24478419 |
| chr6 | 24613640 | 24615913 |
| chr6 | 24622977 | 24623734 |
| chr6 | 24843499 | 24845176 |

|      |          |          |
|------|----------|----------|
| chr6 | 24904642 | 24906358 |
| chr6 | 25061408 | 25062183 |
| chr6 | 25507428 | 25508151 |
| chr6 | 25938176 | 25939712 |
| chr6 | 26831058 | 26831929 |
| chr6 | 28318713 | 28319999 |
| chr6 | 28370611 | 28372516 |
| chr6 | 28429068 | 28431109 |
| chr6 | 28882322 | 28883194 |
| chr6 | 29119345 | 29121593 |
| chr6 | 29297144 | 29298642 |
| chr6 | 29417311 | 29418843 |
| chr6 | 29423274 | 29425453 |
| chr6 | 29456875 | 29458151 |
| chr6 | 29558687 | 29560715 |
| chr6 | 29707974 | 29710182 |
| chr6 | 29718232 | 29719555 |
| chr6 | 29996688 | 29999632 |
| chr6 | 30340600 | 30341981 |
| chr6 | 30408584 | 30411813 |
| chr6 | 30459046 | 30460083 |
| chr6 | 30476549 | 30477934 |
| chr6 | 30496469 | 30497474 |
| chr6 | 30642641 | 30644177 |
| chr6 | 30907009 | 30909536 |
| chr6 | 30987342 | 30988532 |
| chr6 | 31167547 | 31169009 |
| chr6 | 31348385 | 31349972 |
| chr6 | 31883125 | 31884889 |
| chr6 | 32042748 | 32043969 |
| chr6 | 32751207 | 32751791 |
| chr6 | 33198281 | 33199800 |
| chr6 | 33978991 | 33980608 |
| chr6 | 34859759 | 34861136 |
| chr6 | 34944475 | 34945689 |
| chr6 | 35082687 | 35084702 |
| chr6 | 35127084 | 35128782 |
| chr6 | 35345423 | 35346677 |
| chr6 | 36446673 | 36447251 |
| chr6 | 36615144 | 36616618 |
| chr6 | 37539602 | 37540658 |
| chr6 | 37755299 | 37756726 |
| chr6 | 38247981 | 38249772 |



|      |          |          |
|------|----------|----------|
| chr6 | 38303115 | 38305428 |
| chr6 | 38382663 | 38385082 |
| chr6 | 38483185 | 38485935 |
| chr6 | 38500570 | 38502858 |
| chr6 | 38585839 | 38587812 |
| chr6 | 38824620 | 38827638 |
| chr6 | 38875939 | 38877111 |
| chr6 | 39155749 | 39157505 |
| chr6 | 39368973 | 39371503 |
| chr6 | 39419454 | 39421391 |
| chr6 | 39487926 | 39489127 |
| chr6 | 39541751 | 39543283 |
| chr6 | 39674249 | 39675887 |
| chr6 | 40274981 | 40276147 |
| chr6 | 40491514 | 40492397 |
| chr6 | 41068057 | 41068973 |
| chr6 | 42112200 | 42113780 |
| chr6 | 42214311 | 42216196 |
| chr6 | 42298751 | 42301168 |
| chr6 | 42713384 | 42713968 |
| chr6 | 43575497 | 43576103 |
| chr6 | 43615318 | 43616845 |
| chr6 | 43694065 | 43694904 |
| chr6 | 44093226 | 44094193 |
| chr6 | 45435981 | 45436620 |
| chr6 | 46526232 | 46527536 |
| chr6 | 47298680 | 47299625 |
| chr6 | 47403383 | 47405266 |
| chr6 | 47543864 | 47545901 |
| chr6 | 47600103 | 47601914 |
| chr6 | 47727962 | 47728945 |
| chr6 | 47779970 | 47781377 |
| chr6 | 47785003 | 47786668 |
| chr6 | 47826594 | 47828661 |
| chr6 | 47892396 | 47894240 |
| chr6 | 47973686 | 47976486 |
| chr6 | 48012931 | 48015474 |
| chr6 | 48122532 | 48123872 |
| chr6 | 48344560 | 48346921 |
| chr6 | 48387097 | 48389849 |
| chr6 | 48394585 | 48396096 |
| chr6 | 48692045 | 48693880 |
| chr6 | 48768596 | 48769559 |

|      |          |          |
|------|----------|----------|
| chr6 | 49023436 | 49024645 |
| chr6 | 49167438 | 49168749 |
| chr6 | 49212573 | 49214432 |
| chr6 | 49268214 | 49270118 |
| chr6 | 49961024 | 49961972 |
| chr6 | 51219789 | 51221423 |
| chr6 | 51418553 | 51421475 |
| chr6 | 51458854 | 51460343 |
| chr6 | 51542140 | 51543040 |
| chr6 | 51561845 | 51563316 |
| chr6 | 51659813 | 51661314 |
| chr6 | 51681544 | 51682945 |
| chr6 | 51830507 | 51831700 |
| chr6 | 51961833 | 51963296 |
| chr6 | 52112713 | 52115208 |
| chr6 | 52160960 | 52163699 |
| chr6 | 52170734 | 52172986 |
| chr6 | 52194882 | 52196613 |
| chr6 | 52255580 | 52257260 |
| chr6 | 52589369 | 52590867 |
| chr6 | 52624070 | 52625495 |
| chr6 | 52739712 | 52741552 |
| chr6 | 53767186 | 53771545 |
| chr6 | 53989267 | 53991213 |
| chr6 | 54385171 | 54387008 |
| chr6 | 54514303 | 54517059 |
| chr6 | 54544704 | 54546029 |
| chr6 | 55066641 | 55068547 |
| chr6 | 55275716 | 55277072 |
| chr6 | 56267639 | 56268327 |
| chr6 | 56654098 | 56655055 |
| chr6 | 57641456 | 57642618 |
| chr6 | 58589960 | 58590980 |
| chr6 | 58780794 | 58782306 |
| chr6 | 58856475 | 58857638 |
| chr6 | 59079119 | 59080403 |
| chr6 | 59149095 | 59150020 |
| chr6 | 59242380 | 59243296 |
| chr6 | 59407171 | 59408529 |
| chr6 | 60209122 | 60209689 |
| chr6 | 60261837 | 60262507 |
| chr6 | 62340431 | 62341484 |
| chr6 | 62659671 | 62660887 |

|      |          |          |
|------|----------|----------|
| chr6 | 63474113 | 63475172 |
| chr6 | 64748806 | 64750195 |
| chr6 | 64974286 | 64975490 |
| chr6 | 65158513 | 65159016 |
| chr6 | 65165191 | 65165719 |
| chr6 | 66484944 | 66486294 |
| chr6 | 67155273 | 67156229 |
| chr6 | 67169267 | 67170732 |
| chr6 | 67216071 | 67218595 |
| chr6 | 67444419 | 67445169 |
| chr6 | 67458312 | 67459044 |
| chr6 | 67484414 | 67486196 |
| chr6 | 68312272 | 68313068 |
| chr6 | 68348286 | 68349339 |
| chr6 | 69969996 | 69970719 |
| chr6 | 70003189 | 70003900 |
| chr6 | 70951230 | 70953000 |
| chr6 | 71184504 | 71186038 |
| chr6 | 71220507 | 71223003 |
| chr6 | 71582413 | 71583974 |
| chr6 | 71656717 | 71659091 |
| chr6 | 71773150 | 71774630 |
| chr6 | 71780813 | 71782120 |
| chr6 | 71858238 | 71859336 |
| chr6 | 71874935 | 71875724 |
| chr6 | 72304650 | 72306021 |
| chr6 | 72388015 | 72391110 |
| chr6 | 72469914 | 72471510 |
| chr6 | 72905668 | 72909112 |
| chr6 | 73197860 | 73199047 |
| chr6 | 73293579 | 73294778 |
| chr6 | 73451382 | 73452023 |
| chr6 | 74438562 | 74439482 |
| chr6 | 74655958 | 74656604 |
| chr6 | 75340081 | 75340792 |
| chr6 | 78832377 | 78833370 |
| chr6 | 79234285 | 79235411 |
| chr6 | 79633041 | 79633895 |
| chr6 | 79751704 | 79752631 |
| chr6 | 80408326 | 80408798 |
| chr6 | 80842191 | 80843402 |
| chr6 | 81873075 | 81874699 |
| chr6 | 81915219 | 81916954 |

|      |          |          |
|------|----------|----------|
| chr6 | 82575347 | 82575996 |
| chr6 | 82601557 | 82603702 |
| chr6 | 82652048 | 82654282 |
| chr6 | 82722688 | 82725783 |
| chr6 | 82836009 | 82837506 |
| chr6 | 82980835 | 82985169 |
| chr6 | 83003214 | 83005748 |
| chr6 | 83027482 | 83029551 |
| chr6 | 83050867 | 83053124 |
| chr6 | 83056673 | 83060381 |
| chr6 | 83074002 | 83075544 |
| chr6 | 83110743 | 83113099 |
| chr6 | 83275663 | 83276523 |
| chr6 | 83298635 | 83300371 |
| chr6 | 83548768 | 83549832 |
| chr6 | 83574522 | 83575570 |
| chr6 | 83687291 | 83688861 |
| chr6 | 83744299 | 83746492 |
| chr6 | 83863642 | 83865433 |
| chr6 | 84524018 | 84526030 |
| chr6 | 84713997 | 84714706 |
| chr6 | 85018472 | 85019954 |
| chr6 | 85087118 | 85088099 |
| chr6 | 85282191 | 85284328 |
| chr6 | 85380913 | 85383073 |
| chr6 | 85400410 | 85403105 |
| chr6 | 85537009 | 85538471 |
| chr6 | 85911111 | 85912128 |
| chr6 | 85966365 | 85968387 |
| chr6 | 85978038 | 85979767 |
| chr6 | 86313833 | 86316963 |
| chr6 | 86320649 | 86322707 |
| chr6 | 86345999 | 86347991 |
| chr6 | 86353512 | 86355383 |
| chr6 | 86387667 | 86389289 |
| chr6 | 86474470 | 86478033 |
| chr6 | 86545246 | 86546498 |
| chr6 | 86798157 | 86800182 |
| chr6 | 86959149 | 86960349 |
| chr6 | 86991775 | 86993301 |
| chr6 | 87333381 | 87334641 |
| chr6 | 87679632 | 87682962 |
| chr6 | 87788022 | 87789521 |

|      |          |          |
|------|----------|----------|
| chr6 | 87800158 | 87801804 |
| chr6 | 87930818 | 87933121 |
| chr6 | 87994256 | 87996069 |
| chr6 | 88024654 | 88025781 |
| chr6 | 88033980 | 88035706 |
| chr6 | 88055511 | 88057565 |
| chr6 | 88072906 | 88075736 |
| chr6 | 88138636 | 88141410 |
| chr6 | 88467864 | 88469577 |
| chr6 | 88576366 | 88578129 |
| chr6 | 88673718 | 88675741 |
| chr6 | 88848163 | 88849208 |
| chr6 | 89045244 | 89046584 |
| chr6 | 89483867 | 89484795 |
| chr6 | 89544664 | 89546337 |
| chr6 | 89985480 | 89986296 |
| chr6 | 90182225 | 90183657 |
| chr6 | 90258688 | 90260275 |
| chr6 | 90318996 | 90320874 |
| chr6 | 90632507 | 90635041 |
| chr6 | 91128728 | 91131107 |
| chr6 | 91390442 | 91391891 |
| chr6 | 91422270 | 91424721 |
| chr6 | 91465050 | 91466966 |
| chr6 | 91614940 | 91616843 |
| chr6 | 91633536 | 91635027 |
| chr6 | 91650244 | 91652050 |
| chr6 | 91827499 | 91828855 |
| chr6 | 91928869 | 91930857 |
| chr6 | 92040953 | 92042968 |
| chr6 | 92163672 | 92165305 |
| chr6 | 93325214 | 93326528 |
| chr6 | 94449924 | 94451137 |
| chr6 | 94596585 | 94598512 |
| chr6 | 94648799 | 94650953 |
| chr6 | 94710205 | 94711474 |
| chr6 | 95067009 | 95069072 |
| chr6 | 95607041 | 95608447 |
| chr6 | 95668003 | 95669520 |
| chr6 | 95790924 | 95791785 |
| chr6 | 96246712 | 96247468 |
| chr6 | 96545185 | 96545838 |
| chr6 | 96736849 | 96737706 |

|      |           |           |
|------|-----------|-----------|
| chr6 | 96919327  | 96920008  |
| chr6 | 97154792  | 97156012  |
| chr6 | 97160035  | 97161679  |
| chr6 | 99338416  | 99340465  |
| chr6 | 99976681  | 99978252  |
| chr6 | 100162587 | 100164740 |
| chr6 | 100327263 | 100329808 |
| chr6 | 100371509 | 100373123 |
| chr6 | 100401688 | 100403018 |
| chr6 | 100476310 | 100478107 |
| chr6 | 100707805 | 100708410 |
| chr6 | 100783112 | 100784738 |
| chr6 | 100949462 | 100950986 |
| chr6 | 101326108 | 101328692 |
| chr6 | 101535307 | 101536537 |
| chr6 | 101592925 | 101593578 |
| chr6 | 101620360 | 101621447 |
| chr6 | 101711509 | 101712929 |
| chr6 | 102616585 | 102617323 |
| chr6 | 102634024 | 102634623 |
| chr6 | 102723552 | 102724283 |
| chr6 | 103018385 | 103018905 |
| chr6 | 103625990 | 103626888 |
| chr6 | 104335204 | 104335676 |
| chr6 | 105139836 | 105140491 |
| chr6 | 105212110 | 105213077 |
| chr6 | 105401483 | 105402578 |
| chr6 | 106120858 | 106122029 |
| chr6 | 106391789 | 106392873 |
| chr6 | 106409893 | 106410784 |
| chr6 | 106749063 | 106750570 |
| chr6 | 107168076 | 107169776 |
| chr6 | 107627302 | 107627926 |
| chr6 | 107872059 | 107874013 |
| chr6 | 108014143 | 108015854 |
| chr6 | 108134802 | 108136563 |
| chr6 | 108570561 | 108571784 |
| chr6 | 108582085 | 108583777 |
| chr6 | 108617416 | 108619474 |
| chr6 | 108732756 | 108733990 |
| chr6 | 108777880 | 108780092 |
| chr6 | 108996931 | 108998058 |
| chr6 | 109152191 | 109153419 |

|      |           |           |
|------|-----------|-----------|
| chr6 | 109891514 | 109892494 |
| chr6 | 110737221 | 110738165 |
| chr6 | 111338611 | 111339545 |
| chr6 | 112128832 | 112129937 |
| chr6 | 112311506 | 112313055 |
| chr6 | 112646010 | 112647447 |
| chr6 | 112802354 | 112803483 |
| chr6 | 113025883 | 113028778 |
| chr6 | 113256181 | 113258765 |
| chr6 | 113431651 | 113434803 |
| chr6 | 113480458 | 113482563 |
| chr6 | 113553834 | 113555589 |
| chr6 | 113573478 | 113575007 |
| chr6 | 113698042 | 113700454 |
| chr6 | 113771510 | 113773190 |
| chr6 | 114080221 | 114082171 |
| chr6 | 115488146 | 115490200 |
| chr6 | 115532208 | 115534324 |
| chr6 | 115624996 | 115627900 |
| chr6 | 115723842 | 115725371 |
| chr6 | 115756559 | 115759569 |
| chr6 | 116430660 | 116431617 |
| chr6 | 116528543 | 116529394 |
| chr6 | 116578424 | 116579368 |
| chr6 | 116833646 | 116834904 |
| chr6 | 116875726 | 116877086 |
| chr6 | 117790587 | 117792153 |
| chr6 | 117828816 | 117830796 |
| chr6 | 117855867 | 117859077 |
| chr6 | 117866018 | 117868789 |
| chr6 | 117926623 | 117929776 |
| chr6 | 118146075 | 118148722 |
| chr6 | 118165363 | 118166682 |
| chr6 | 118256358 | 118258368 |
| chr6 | 119124350 | 119126374 |
| chr6 | 119797188 | 119799298 |
| chr6 | 119986532 | 119989914 |
| chr6 | 120013831 | 120016063 |
| chr6 | 120137284 | 120139870 |
| chr6 | 120243833 | 120245685 |
| chr6 | 120412825 | 120414457 |
| chr6 | 120480598 | 120482359 |
| chr6 | 120488941 | 120490539 |

|      |           |           |
|------|-----------|-----------|
| chr6 | 120593998 | 120595305 |
| chr6 | 120616540 | 120618317 |
| chr6 | 120772179 | 120773310 |
| chr6 | 120785323 | 120787440 |
| chr6 | 120866187 | 120867298 |
| chr6 | 121078801 | 121081443 |
| chr6 | 121496757 | 121497968 |
| chr6 | 122340715 | 122342663 |
| chr6 | 122418382 | 122419907 |
| chr6 | 122555988 | 122558075 |
| chr6 | 122558364 | 122560406 |
| chr6 | 122593662 | 122594943 |
| chr6 | 122655018 | 122657054 |
| chr6 | 122715586 | 122717517 |
| chr6 | 122823718 | 122825555 |
| chr6 | 122992248 | 122993477 |
| chr6 | 124161170 | 124161798 |
| chr6 | 124502574 | 124503229 |
| chr6 | 124612243 | 124614017 |
| chr6 | 124661444 | 124663464 |
| chr6 | 124666843 | 124670024 |
| chr6 | 124689818 | 124692083 |
| chr6 | 124755185 | 124757186 |
| chr6 | 124762654 | 124765051 |
| chr6 | 124777996 | 124780688 |
| chr6 | 124914241 | 124916642 |
| chr6 | 124946275 | 124950471 |
| chr6 | 124958061 | 124959878 |
| chr6 | 124988881 | 124990823 |
| chr6 | 125030583 | 125033137 |
| chr6 | 125045219 | 125047992 |
| chr6 | 125110034 | 125112152 |
| chr6 | 125113042 | 125117983 |
| chr6 | 125140880 | 125143233 |
| chr6 | 125309178 | 125312570 |
| chr6 | 125376023 | 125377020 |
| chr6 | 125439351 | 125441708 |
| chr6 | 125443500 | 125445482 |
| chr6 | 125478064 | 125479981 |
| chr6 | 126405498 | 126406275 |
| chr6 | 126592043 | 126595462 |
| chr6 | 126798040 | 126800313 |
| chr6 | 126888869 | 126890574 |



|      |           |           |
|------|-----------|-----------|
| chr6 | 127029366 | 127031185 |
| chr6 | 127099442 | 127103227 |
| chr6 | 127131025 | 127132587 |
| chr6 | 127402951 | 127404840 |
| chr6 | 127716899 | 127719317 |
| chr6 | 127977768 | 127979670 |
| chr6 | 128373661 | 128375639 |
| chr6 | 128386663 | 128389626 |
| chr6 | 128410619 | 128411981 |
| chr6 | 128787257 | 128790465 |
| chr6 | 128794622 | 128796494 |
| chr6 | 131336922 | 131338880 |
| chr6 | 133034343 | 133035241 |
| chr6 | 133054986 | 133056626 |
| chr6 | 133810222 | 133810789 |
| chr6 | 133984340 | 133986501 |
| chr6 | 134197822 | 134199855 |
| chr6 | 134375157 | 134376166 |
| chr6 | 134569077 | 134570816 |
| chr6 | 134711059 | 134712758 |
| chr6 | 134779129 | 134780913 |
| chr6 | 134836918 | 134838760 |
| chr6 | 134846885 | 134848938 |
| chr6 | 134869500 | 134871664 |
| chr6 | 134876513 | 134878852 |
| chr6 | 134887029 | 134887820 |
| chr6 | 134933008 | 134935061 |
| chr6 | 134960747 | 134962677 |
| chr6 | 135146854 | 135148860 |
| chr6 | 135202542 | 135203630 |
| chr6 | 135281915 | 135285293 |
| chr6 | 135475845 | 135478167 |
| chr6 | 136131229 | 136132491 |
| chr6 | 136338096 | 136340823 |
| chr6 | 136416775 | 136420500 |
| chr6 | 136435119 | 136436496 |
| chr6 | 136466602 | 136468062 |
| chr6 | 136473060 | 136474395 |
| chr6 | 136480344 | 136482105 |
| chr6 | 136609109 | 136611567 |
| chr6 | 136743523 | 136745073 |
| chr6 | 136775811 | 136777566 |
| chr6 | 137378958 | 137380263 |

|      |           |           |
|------|-----------|-----------|
| chr6 | 137596131 | 137598122 |
| chr6 | 137682949 | 137684753 |
| chr6 | 137702410 | 137704070 |
| chr6 | 137728726 | 137730651 |
| chr6 | 138464388 | 138464943 |
| chr6 | 139983371 | 139984681 |
| chr6 | 140190768 | 140192881 |
| chr6 | 140245944 | 140247329 |
| chr6 | 140283587 | 140285678 |
| chr6 | 140570595 | 140574073 |
| chr6 | 140817851 | 140818616 |
| chr6 | 141197813 | 141199269 |
| chr6 | 141532614 | 141533443 |
| chr6 | 141702050 | 141702837 |
| chr6 | 142335085 | 142336417 |
| chr6 | 142704662 | 142706186 |
| chr6 | 143047519 | 143049386 |
| chr6 | 143077294 | 143079248 |
| chr6 | 143908315 | 143910237 |
| chr6 | 144173076 | 144174070 |
| chr6 | 145159035 | 145160440 |
| chr6 | 145365380 | 145366336 |
| chr6 | 146525507 | 146527258 |
| chr6 | 146581605 | 146583508 |
| chr6 | 146590104 | 146592004 |
| chr6 | 146672618 | 146674158 |
| chr6 | 146990242 | 146992513 |
| chr6 | 147024312 | 147025916 |
| chr6 | 147038886 | 147041303 |
| chr6 | 148159523 | 148161223 |
| chr6 | 148302666 | 148304380 |
| chr6 | 148778852 | 148781061 |
| chr6 | 148892808 | 148895240 |
| chr6 | 149356514 | 149358730 |
| chr7 | 3217674   | 3220943   |
| chr7 | 3264011   | 3265606   |
| chr7 | 3365298   | 3367583   |
| chr7 | 3546208   | 3547243   |
| chr7 | 3567966   | 3569905   |
| chr7 | 3595962   | 3597812   |
| chr7 | 3643911   | 3646610   |
| chr7 | 3655294   | 3656985   |
| chr7 | 4105788   | 4107058   |

|      |          |          |
|------|----------|----------|
| chr7 | 4396424  | 4397417  |
| chr7 | 4421036  | 4424029  |
| chr7 | 4429252  | 4431793  |
| chr7 | 4452465  | 4454643  |
| chr7 | 4497287  | 4499617  |
| chr7 | 4609731  | 4611406  |
| chr7 | 4635680  | 4637138  |
| chr7 | 4655803  | 4657168  |
| chr7 | 4690339  | 4693891  |
| chr7 | 4739872  | 4741930  |
| chr7 | 4743685  | 4745871  |
| chr7 | 4762799  | 4765334  |
| chr7 | 4795475  | 4797744  |
| chr7 | 4845548  | 4847124  |
| chr7 | 4863067  | 4864701  |
| chr7 | 4871068  | 4873231  |
| chr7 | 4873320  | 4876606  |
| chr7 | 4965611  | 4967894  |
| chr7 | 4980843  | 4983938  |
| chr7 | 4988945  | 4990782  |
| chr7 | 5002310  | 5004204  |
| chr7 | 5011049  | 5013644  |
| chr7 | 5013691  | 5015155  |
| chr7 | 5031279  | 5032520  |
| chr7 | 5076555  | 5077996  |
| chr7 | 5153976  | 5154607  |
| chr7 | 6106026  | 6108195  |
| chr7 | 6122864  | 6124744  |
| chr7 | 6139953  | 6142447  |
| chr7 | 6296533  | 6297602  |
| chr7 | 6679168  | 6683818  |
| chr7 | 6900499  | 6901278  |
| chr7 | 7123505  | 7124874  |
| chr7 | 7230291  | 7231431  |
| chr7 | 7248155  | 7250164  |
| chr7 | 7250353  | 7253525  |
| chr7 | 11056379 | 11057051 |
| chr7 | 11079671 | 11081263 |
| chr7 | 12875236 | 12875890 |
| chr7 | 13063208 | 13064384 |
| chr7 | 13365196 | 13366228 |
| chr7 | 13388218 | 13389498 |
| chr7 | 13403249 | 13404582 |

|      |          |          |
|------|----------|----------|
| chr7 | 13419520 | 13421162 |
| chr7 | 13465958 | 13467359 |
| chr7 | 13482735 | 13483555 |
| chr7 | 13495046 | 13496364 |
| chr7 | 13506833 | 13508506 |
| chr7 | 13512431 | 13514920 |
| chr7 | 13607958 | 13611216 |
| chr7 | 14117681 | 14118861 |
| chr7 | 14823805 | 14824606 |
| chr7 | 16506169 | 16508601 |
| chr7 | 16530436 | 16531973 |
| chr7 | 16532977 | 16534299 |
| chr7 | 16646175 | 16647661 |
| chr7 | 16704008 | 16706151 |
| chr7 | 16821622 | 16823758 |
| chr7 | 16881886 | 16883111 |
| chr7 | 16972263 | 16974077 |
| chr7 | 16984578 | 16988298 |
| chr7 | 17198812 | 17201628 |
| chr7 | 17297158 | 17299266 |
| chr7 | 17314726 | 17316963 |
| chr7 | 17395311 | 17397786 |
| chr7 | 17400788 | 17403050 |
| chr7 | 17470389 | 17472627 |
| chr7 | 17545740 | 17546960 |
| chr7 | 17578861 | 17581090 |
| chr7 | 17612011 | 17613970 |
| chr7 | 17641187 | 17642492 |
| chr7 | 18772534 | 18773707 |
| chr7 | 19575559 | 19578059 |
| chr7 | 19588703 | 19591962 |
| chr7 | 19608345 | 19610805 |
| chr7 | 19637792 | 19640515 |
| chr7 | 19660625 | 19662967 |
| chr7 | 19703186 | 19706122 |
| chr7 | 19864020 | 19865548 |
| chr7 | 19867292 | 19869117 |
| chr7 | 19926210 | 19928260 |
| chr7 | 19942688 | 19947490 |
| chr7 | 19958076 | 19959257 |
| chr7 | 19960221 | 19961817 |
| chr7 | 20079657 | 20082478 |
| chr7 | 20091634 | 20095309 |

|      |          |          |
|------|----------|----------|
| chr7 | 20157776 | 20159762 |
| chr7 | 20249391 | 20251315 |
| chr7 | 20281432 | 20283197 |
| chr7 | 20349670 | 20351520 |
| chr7 | 20354804 | 20357718 |
| chr7 | 20381050 | 20382908 |
| chr7 | 20431912 | 20433062 |
| chr7 | 24865904 | 24868111 |
| chr7 | 24959296 | 24960868 |
| chr7 | 25022213 | 25023390 |
| chr7 | 25053206 | 25054721 |
| chr7 | 25156638 | 25158166 |
| chr7 | 25301048 | 25303679 |
| chr7 | 25654026 | 25655657 |
| chr7 | 25668334 | 25670950 |
| chr7 | 25756721 | 25758519 |
| chr7 | 25793857 | 25796355 |
| chr7 | 25860890 | 25862800 |
| chr7 | 25864626 | 25868054 |
| chr7 | 26022077 | 26023962 |
| chr7 | 26051574 | 26054694 |
| chr7 | 26055468 | 26058966 |
| chr7 | 26085793 | 26086667 |
| chr7 | 26100039 | 26101472 |
| chr7 | 26203985 | 26205690 |
| chr7 | 26385365 | 26387230 |
| chr7 | 26403455 | 26405480 |
| chr7 | 26442986 | 26445056 |
| chr7 | 26538519 | 26541129 |
| chr7 | 27943729 | 27945892 |
| chr7 | 27962847 | 27964310 |
| chr7 | 28018418 | 28019294 |
| chr7 | 28112393 | 28116633 |
| chr7 | 28188635 | 28190258 |
| chr7 | 28457871 | 28460324 |
| chr7 | 28515759 | 28518465 |
| chr7 | 28834308 | 28836152 |
| chr7 | 28963806 | 28966100 |
| chr7 | 29052246 | 29053847 |
| chr7 | 29062059 | 29063905 |
| chr7 | 29095725 | 29097629 |
| chr7 | 29122651 | 29125020 |
| chr7 | 29176610 | 29178885 |

|      |          |          |
|------|----------|----------|
| chr7 | 29250993 | 29253227 |
| chr7 | 29381236 | 29384048 |
| chr7 | 29482756 | 29484135 |
| chr7 | 29519695 | 29521721 |
| chr7 | 29525838 | 29527687 |
| chr7 | 29550498 | 29552493 |
| chr7 | 29593433 | 29596974 |
| chr7 | 29609100 | 29611420 |
| chr7 | 29746412 | 29747927 |
| chr7 | 29753689 | 29756059 |
| chr7 | 29855984 | 29858503 |
| chr7 | 29870358 | 29872295 |
| chr7 | 29922263 | 29923075 |
| chr7 | 29964850 | 29965997 |
| chr7 | 29998314 | 29999635 |
| chr7 | 29999848 | 30000986 |
| chr7 | 30028308 | 30031029 |
| chr7 | 30066180 | 30068047 |
| chr7 | 30092157 | 30093773 |
| chr7 | 30134665 | 30136390 |
| chr7 | 30237642 | 30240991 |
| chr7 | 30552901 | 30554470 |
| chr7 | 30692930 | 30694608 |
| chr7 | 30768023 | 30770129 |
| chr7 | 30874526 | 30876632 |
| chr7 | 30878747 | 30880686 |
| chr7 | 30927455 | 30929161 |
| chr7 | 30954028 | 30956146 |
| chr7 | 31015909 | 31019479 |
| chr7 | 31064418 | 31066251 |
| chr7 | 31144329 | 31146292 |
| chr7 | 31207835 | 31208923 |
| chr7 | 31224575 | 31226389 |
| chr7 | 31347654 | 31349464 |
| chr7 | 31387082 | 31389386 |
| chr7 | 31389419 | 31390865 |
| chr7 | 31449584 | 31451023 |
| chr7 | 31636382 | 31637272 |
| chr7 | 31740120 | 31741808 |
| chr7 | 31757181 | 31759865 |
| chr7 | 31867763 | 31870198 |
| chr7 | 31900951 | 31902935 |
| chr7 | 31946787 | 31948016 |

|      |          |          |
|------|----------|----------|
| chr7 | 32157182 | 32158425 |
| chr7 | 34832133 | 34832995 |
| chr7 | 34913629 | 34914782 |
| chr7 | 34952588 | 34954639 |
| chr7 | 34980493 | 34982075 |
| chr7 | 35018544 | 35020066 |
| chr7 | 35026947 | 35027753 |
| chr7 | 35173472 | 35175677 |
| chr7 | 35301521 | 35303238 |
| chr7 | 35331020 | 35332939 |
| chr7 | 35439506 | 35441500 |
| chr7 | 35696453 | 35698264 |
| chr7 | 35848867 | 35850155 |
| chr7 | 35987320 | 35990370 |
| chr7 | 36018822 | 36020402 |
| chr7 | 36053865 | 36055577 |
| chr7 | 36102807 | 36104150 |
| chr7 | 36107224 | 36108791 |
| chr7 | 36180592 | 36182555 |
| chr7 | 36185548 | 36187425 |
| chr7 | 36321736 | 36323140 |
| chr7 | 36339481 | 36341376 |
| chr7 | 36431514 | 36433081 |
| chr7 | 36530720 | 36532770 |
| chr7 | 36587237 | 36588864 |
| chr7 | 37553998 | 37556800 |
| chr7 | 37719789 | 37720791 |
| chr7 | 37828201 | 37829235 |
| chr7 | 38095501 | 38096952 |
| chr7 | 38352570 | 38355038 |
| chr7 | 38432742 | 38434175 |
| chr7 | 38860082 | 38861160 |
| chr7 | 38890826 | 38893158 |
| chr7 | 38896236 | 38898353 |
| chr7 | 38943980 | 38945275 |
| chr7 | 38985609 | 38986883 |
| chr7 | 46770025 | 46770863 |
| chr7 | 46772768 | 46773662 |
| chr7 | 47670866 | 47672227 |
| chr7 | 48684276 | 48684975 |
| chr7 | 48815672 | 48816789 |
| chr7 | 48853825 | 48855371 |
| chr7 | 48887886 | 48889352 |

|      |          |          |
|------|----------|----------|
| chr7 | 49071305 | 49071867 |
| chr7 | 49847597 | 49848226 |
| chr7 | 50432157 | 50433522 |
| chr7 | 50567876 | 50569767 |
| chr7 | 50698113 | 50699956 |
| chr7 | 50719943 | 50722250 |
| chr7 | 50834476 | 50835968 |
| chr7 | 51036792 | 51039213 |
| chr7 | 51071098 | 51072892 |
| chr7 | 51114659 | 51116312 |
| chr7 | 51501124 | 51502963 |
| chr7 | 51525981 | 51528111 |
| chr7 | 51558939 | 51562070 |
| chr7 | 51591784 | 51593955 |
| chr7 | 51660429 | 51662055 |
| chr7 | 51716182 | 51718610 |
| chr7 | 51721868 | 51724673 |
| chr7 | 51751088 | 51753666 |
| chr7 | 51957026 | 51958412 |
| chr7 | 52071047 | 52072719 |
| chr7 | 52094414 | 52096151 |
| chr7 | 52103397 | 52106749 |
| chr7 | 52107290 | 52111006 |
| chr7 | 52146662 | 52148414 |
| chr7 | 52150104 | 52152433 |
| chr7 | 52240159 | 52243075 |
| chr7 | 52270802 | 52272724 |
| chr7 | 52341263 | 52342869 |
| chr7 | 52378350 | 52380672 |
| chr7 | 52381300 | 52385602 |
| chr7 | 52409211 | 52410961 |
| chr7 | 52495269 | 52497053 |
| chr7 | 52531326 | 52532973 |
| chr7 | 52596802 | 52599523 |
| chr7 | 52616069 | 52617846 |
| chr7 | 52688601 | 52691144 |
| chr7 | 52693879 | 52696238 |
| chr7 | 52714397 | 52717565 |
| chr7 | 52719776 | 52722891 |
| chr7 | 52743128 | 52745159 |
| chr7 | 52776548 | 52778133 |
| chr7 | 52813325 | 52814771 |
| chr7 | 52822781 | 52824219 |



|      |          |          |
|------|----------|----------|
| chr7 | 52885069 | 52886882 |
| chr7 | 52887202 | 52888617 |
| chr7 | 52937570 | 52939408 |
| chr7 | 52948542 | 52950493 |
| chr7 | 52969587 | 52971675 |
| chr7 | 52972907 | 52975576 |
| chr7 | 52985616 | 52987539 |
| chr7 | 53085134 | 53087197 |
| chr7 | 53151322 | 53153760 |
| chr7 | 53499953 | 53501817 |
| chr7 | 53941632 | 53943166 |
| chr7 | 53965081 | 53966430 |
| chr7 | 54050427 | 54052671 |
| chr7 | 54100077 | 54102895 |
| chr7 | 54282948 | 54284434 |
| chr7 | 55392467 | 55393342 |
| chr7 | 56954566 | 56956197 |
| chr7 | 59116471 | 59118062 |
| chr7 | 59134239 | 59135078 |
| chr7 | 61615733 | 61616359 |
| chr7 | 61873809 | 61874478 |
| chr7 | 62842194 | 62843435 |
| chr7 | 62869613 | 62870571 |
| chr7 | 63049087 | 63050649 |
| chr7 | 65913403 | 65914985 |
| chr7 | 66483334 | 66485638 |
| chr7 | 67147342 | 67150140 |
| chr7 | 68337156 | 68337835 |
| chr7 | 69563626 | 69565891 |
| chr7 | 70903238 | 70904616 |
| chr7 | 71081156 | 71085500 |
| chr7 | 71100973 | 71103559 |
| chr7 | 71135908 | 71137693 |
| chr7 | 71431313 | 71433363 |
| chr7 | 71518550 | 71519573 |
| chr7 | 71536141 | 71538050 |
| chr7 | 71696792 | 71698431 |
| chr7 | 72300196 | 72301883 |
| chr7 | 72788809 | 72790499 |
| chr7 | 72837589 | 72839403 |
| chr7 | 73007211 | 73008586 |
| chr7 | 73223949 | 73225145 |
| chr7 | 73394505 | 73396121 |

|      |          |          |
|------|----------|----------|
| chr7 | 73647779 | 73649351 |
| chr7 | 73834584 | 73835873 |
| chr7 | 74517465 | 74518770 |
| chr7 | 74789629 | 74791104 |
| chr7 | 74806992 | 74808556 |
| chr7 | 74810106 | 74811611 |
| chr7 | 75095186 | 75098394 |
| chr7 | 75273915 | 75275400 |
| chr7 | 76196908 | 76197863 |
| chr7 | 77337606 | 77338520 |
| chr7 | 77432646 | 77433797 |
| chr7 | 78900719 | 78901376 |
| chr7 | 80151635 | 80152821 |
| chr7 | 80454969 | 80456410 |
| chr7 | 80669092 | 80670086 |
| chr7 | 80682481 | 80683563 |
| chr7 | 80685460 | 80687089 |
| chr7 | 80701574 | 80704482 |
| chr7 | 80750939 | 80752765 |
| chr7 | 80761535 | 80762268 |
| chr7 | 80762488 | 80764610 |
| chr7 | 80884688 | 80886579 |
| chr7 | 81019842 | 81021020 |
| chr7 | 81889819 | 81890852 |
| chr7 | 82225173 | 82225880 |
| chr7 | 83140926 | 83141842 |
| chr7 | 84070616 | 84071159 |
| chr7 | 85560675 | 85561713 |
| chr7 | 85723526 | 85725263 |
| chr7 | 85927316 | 85928700 |
| chr7 | 85991183 | 85993102 |
| chr7 | 86531050 | 86534061 |
| chr7 | 86538725 | 86540549 |
| chr7 | 86659182 | 86661398 |
| chr7 | 86701605 | 86703594 |
| chr7 | 86736457 | 86738139 |
| chr7 | 86804401 | 86806987 |
| chr7 | 86865650 | 86867004 |
| chr7 | 86873045 | 86874484 |
| chr7 | 86936626 | 86938942 |
| chr7 | 86954573 | 86957157 |
| chr7 | 86963013 | 86964623 |
| chr7 | 87274323 | 87276156 |

|      |           |           |
|------|-----------|-----------|
| chr7 | 87390526  | 87392262  |
| chr7 | 87405057  | 87406996  |
| chr7 | 87469922  | 87471507  |
| chr7 | 87679022  | 87680430  |
| chr7 | 88005341  | 88006447  |
| chr7 | 88032741  | 88034897  |
| chr7 | 88137336  | 88138528  |
| chr7 | 88206913  | 88209806  |
| chr7 | 88295597  | 88298405  |
| chr7 | 88347501  | 88348998  |
| chr7 | 88465550  | 88467102  |
| chr7 | 88488804  | 88490732  |
| chr7 | 88597694  | 88599393  |
| chr7 | 88906556  | 88908687  |
| chr7 | 88972798  | 88975519  |
| chr7 | 88998088  | 88999514  |
| chr7 | 89078054  | 89079879  |
| chr7 | 89378271  | 89380466  |
| chr7 | 89405113  | 89406538  |
| chr7 | 89929182  | 89931058  |
| chr7 | 90016311  | 90019054  |
| chr7 | 90334498  | 90335439  |
| chr7 | 90715279  | 90716745  |
| chr7 | 91029837  | 91033843  |
| chr7 | 91039833  | 91041936  |
| chr7 | 91557356  | 91559440  |
| chr7 | 91927400  | 91928668  |
| chr7 | 92535909  | 92536535  |
| chr7 | 93266869  | 93268316  |
| chr7 | 93814079  | 93814718  |
| chr7 | 94394964  | 94395830  |
| chr7 | 94563665  | 94564160  |
| chr7 | 96486503  | 96487849  |
| chr7 | 97088731  | 97090024  |
| chr7 | 97278055  | 97279763  |
| chr7 | 97605181  | 97606291  |
| chr7 | 97623477  | 97625682  |
| chr7 | 98094829  | 98095814  |
| chr7 | 99709176  | 99710713  |
| chr7 | 99816656  | 99819483  |
| chr7 | 99889377  | 99891016  |
| chr7 | 100022498 | 100024534 |
| chr7 | 100228100 | 100229987 |

|      |           |           |
|------|-----------|-----------|
| chr7 | 103346645 | 103347598 |
| chr7 | 104472969 | 104474792 |
| chr7 | 104519139 | 104520695 |
| chr7 | 104629170 | 104630265 |
| chr7 | 104727423 | 104729970 |
| chr7 | 104885428 | 104887186 |
| chr7 | 105067714 | 105069110 |
| chr7 | 105341692 | 105343603 |
| chr7 | 105803881 | 105806137 |
| chr7 | 105877598 | 105878992 |
| chr7 | 105963071 | 105964479 |
| chr7 | 105993903 | 105996229 |
| chr7 | 106111423 | 106112811 |
| chr7 | 106288671 | 106290365 |
| chr7 | 106528767 | 106530956 |
| chr7 | 106615923 | 106618226 |
| chr7 | 106630985 | 106632921 |
| chr7 | 106727358 | 106729020 |
| chr7 | 106773867 | 106776265 |
| chr7 | 107006322 | 107008518 |
| chr7 | 107127989 | 107129304 |
| chr7 | 107269098 | 107270689 |
| chr7 | 107307480 | 107308925 |
| chr7 | 107519893 | 107521276 |
| chr7 | 107640421 | 107647053 |
| chr7 | 107648180 | 107652300 |
| chr7 | 107755193 | 107757453 |
| chr7 | 107854365 | 107855702 |
| chr7 | 108078762 | 108081984 |
| chr7 | 108086518 | 108088575 |
| chr7 | 108449543 | 108451570 |
| chr7 | 108662449 | 108665377 |
| chr7 | 108811305 | 108813524 |
| chr7 | 108984153 | 108987064 |
| chr7 | 109016666 | 109018781 |
| chr7 | 109212960 | 109214599 |
| chr7 | 109261039 | 109263039 |
| chr7 | 109589525 | 109591371 |
| chr7 | 110350260 | 110350828 |
| chr7 | 111115140 | 111115975 |
| chr7 | 111182811 | 111183645 |
| chr7 | 111267755 | 111268970 |
| chr7 | 111795394 | 111796167 |

|      |           |           |
|------|-----------|-----------|
| chr7 | 112547689 | 112549342 |
| chr7 | 112581939 | 112584550 |
| chr7 | 112728760 | 112730418 |
| chr7 | 112788001 | 112789922 |
| chr7 | 112901609 | 112903543 |
| chr7 | 112957975 | 112960510 |
| chr7 | 114352567 | 114354968 |
| chr7 | 114482923 | 114484155 |
| chr7 | 114997250 | 114997871 |
| chr7 | 115171220 | 115172115 |
| chr7 | 115673352 | 115674079 |
| chr7 | 116077215 | 116078762 |
| chr7 | 116093453 | 116095371 |
| chr7 | 116226355 | 116227491 |
| chr7 | 116312489 | 116314279 |
| chr7 | 116661449 | 116663899 |
| chr7 | 117161214 | 117162861 |
| chr7 | 117204101 | 117206251 |
| chr7 | 117264744 | 117266951 |
| chr7 | 117757377 | 117758935 |
| chr7 | 117773057 | 117775075 |
| chr7 | 118224925 | 118227406 |
| chr7 | 118265311 | 118266991 |
| chr7 | 119166160 | 119167720 |
| chr7 | 119570440 | 119572205 |
| chr7 | 120096484 | 120099734 |
| chr7 | 120223145 | 120225037 |
| chr7 | 120634611 | 120635906 |
| chr7 | 120656515 | 120658284 |
| chr7 | 121260301 | 121262464 |
| chr7 | 121705737 | 121707057 |
| chr7 | 122070198 | 122071737 |
| chr7 | 122596296 | 122597725 |
| chr7 | 123177102 | 123178532 |
| chr7 | 123236151 | 123237573 |
| chr7 | 123450196 | 123452262 |
| chr7 | 123476402 | 123478432 |
| chr7 | 124477194 | 124478538 |
| chr7 | 125258534 | 125260708 |
| chr7 | 125272251 | 125273848 |
| chr7 | 125386558 | 125388386 |
| chr7 | 125590300 | 125593017 |
| chr7 | 125632950 | 125635697 |

|      |           |           |
|------|-----------|-----------|
| chr7 | 125847963 | 125849831 |
| chr7 | 125855689 | 125856994 |
| chr7 | 125883304 | 125885336 |
| chr7 | 125998286 | 126000217 |
| chr7 | 126863224 | 126865158 |
| chr7 | 127038863 | 127040338 |
| chr7 | 127427838 | 127429014 |
| chr7 | 127601584 | 127602659 |
| chr7 | 127778031 | 127779884 |
| chr7 | 127985972 | 127987797 |
| chr7 | 128060913 | 128062326 |
| chr7 | 128177164 | 128178952 |
| chr7 | 128849866 | 128852233 |
| chr7 | 129161749 | 129163318 |
| chr7 | 129163336 | 129165005 |
| chr7 | 129209629 | 129211902 |
| chr7 | 129244759 | 129246178 |
| chr7 | 129432072 | 129434077 |
| chr7 | 130112553 | 130114783 |
| chr7 | 130241233 | 130242263 |
| chr7 | 130266909 | 130268759 |
| chr7 | 132634039 | 132636149 |
| chr7 | 132850008 | 132851936 |
| chr7 | 133342943 | 133344707 |
| chr7 | 133519661 | 133521949 |
| chr7 | 133539457 | 133541342 |
| chr7 | 133617828 | 133619533 |
| chr7 | 133630198 | 133632005 |
| chr7 | 133709044 | 133710686 |
| chr7 | 133726120 | 133729064 |
| chr7 | 133916298 | 133917598 |
| chr7 | 134004566 | 134006888 |
| chr7 | 134027117 | 134028957 |
| chr7 | 134071840 | 134073389 |
| chr7 | 134158755 | 134162009 |
| chr7 | 134170614 | 134172293 |
| chr7 | 134375553 | 134377539 |
| chr7 | 134415698 | 134418239 |
| chr7 | 134452640 | 134454876 |
| chr7 | 134518521 | 134520082 |
| chr7 | 134529693 | 134531109 |
| chr7 | 134535819 | 134538182 |
| chr7 | 134549333 | 134550789 |

|      |           |           |
|------|-----------|-----------|
| chr7 | 134564721 | 134566537 |
| chr7 | 134591365 | 134593449 |
| chr7 | 134613422 | 134616285 |
| chr7 | 134654658 | 134656985 |
| chr7 | 134731289 | 134733432 |
| chr7 | 134850871 | 134853291 |
| chr7 | 134887838 | 134892136 |
| chr7 | 135009501 | 135012325 |
| chr7 | 135018493 | 135021121 |
| chr7 | 135055216 | 135057123 |
| chr7 | 135110302 | 135112274 |
| chr7 | 135152571 | 135154252 |
| chr7 | 135379798 | 135382831 |
| chr7 | 135603615 | 135605954 |
| chr7 | 135666530 | 135668167 |
| chr7 | 135706838 | 135707590 |
| chr7 | 135883397 | 135884895 |
| chr7 | 135887514 | 135889623 |
| chr7 | 135985761 | 135986798 |
| chr7 | 137395273 | 137397206 |
| chr7 | 137662425 | 137663993 |
| chr7 | 137689676 | 137691294 |
| chr7 | 137789056 | 137790783 |
| chr7 | 138008475 | 138010287 |
| chr7 | 138460702 | 138461770 |
| chr7 | 138524493 | 138525495 |
| chr7 | 138553017 | 138554763 |
| chr7 | 138696295 | 138698548 |
| chr7 | 138703543 | 138704784 |
| chr7 | 139157643 | 139159813 |
| chr7 | 140043324 | 140044839 |
| chr7 | 140049926 | 140052049 |
| chr7 | 140087388 | 140089232 |
| chr7 | 140122371 | 140124048 |
| chr7 | 140900137 | 140901565 |
| chr7 | 141070793 | 141072133 |
| chr7 | 141861192 | 141863411 |
| chr7 | 142398767 | 142399623 |
| chr7 | 142568315 | 142569335 |
| chr7 | 144628385 | 144630716 |
| chr7 | 146037170 | 146039453 |
| chr7 | 146131721 | 146133349 |
| chr7 | 146549015 | 146551143 |

|      |           |           |
|------|-----------|-----------|
| chr7 | 146766025 | 146769718 |
| chr7 | 147080275 | 147081310 |
| chr7 | 147246330 | 147248376 |
| chr7 | 147301442 | 147303261 |
| chr7 | 147322674 | 147324573 |
| chr7 | 147972954 | 147974320 |
| chr7 | 148007119 | 148008575 |
| chr7 | 148020841 | 148022466 |
| chr7 | 148067131 | 148068758 |
| chr7 | 148305197 | 148306580 |
| chr7 | 148400207 | 148404098 |
| chr7 | 148413548 | 148415727 |
| chr7 | 148512547 | 148515236 |
| chr7 | 148599065 | 148600889 |
| chr7 | 148602081 | 148603297 |
| chr7 | 148632786 | 148634530 |
| chr7 | 148660136 | 148663328 |
| chr7 | 148747243 | 148749628 |
| chr7 | 149087814 | 149089078 |
| chr7 | 149718344 | 149720016 |
| chr7 | 150192761 | 150195030 |
| chr7 | 150305177 | 150306951 |
| chr7 | 150480466 | 150483176 |
| chr7 | 150560742 | 150563457 |
| chr7 | 150686048 | 150689174 |
| chr7 | 150733962 | 150735707 |
| chr7 | 150834956 | 150835940 |
| chr7 | 151163566 | 151165652 |
| chr7 | 151595049 | 151598403 |
| chr7 | 152057934 | 152060267 |
| chr7 | 152100587 | 152102103 |
| chr7 | 152122669 | 152130292 |
| chr8 | 3278699   | 3280031   |
| chr8 | 3514048   | 3517785   |
| chr8 | 3620404   | 3622203   |
| chr8 | 3630272   | 3632346   |
| chr8 | 4086919   | 4087723   |
| chr8 | 4165611   | 4166994   |
| chr8 | 4204880   | 4207284   |
| chr8 | 4237759   | 4239843   |
| chr8 | 4275302   | 4276632   |
| chr8 | 4676626   | 4678975   |
| chr8 | 4779081   | 4779818   |



|      |          |          |
|------|----------|----------|
| chr8 | 8699979  | 8701483  |
| chr8 | 8710584  | 8712220  |
| chr8 | 9358103  | 9359300  |
| chr8 | 9550422  | 9551578  |
| chr8 | 9975778  | 9976776  |
| chr8 | 10420489 | 10422141 |
| chr8 | 11496786 | 11498650 |
| chr8 | 11556783 | 11559280 |
| chr8 | 11634206 | 11637022 |
| chr8 | 11727948 | 11729183 |
| chr8 | 11959400 | 11960431 |
| chr8 | 12395021 | 12397866 |
| chr8 | 12476948 | 12478645 |
| chr8 | 12671162 | 12672866 |
| chr8 | 13103631 | 13106777 |
| chr8 | 13213068 | 13214730 |
| chr8 | 13286717 | 13288617 |
| chr8 | 13676195 | 13677983 |
| chr8 | 13757359 | 13758608 |
| chr8 | 13869162 | 13870478 |
| chr8 | 13991348 | 13993209 |
| chr8 | 14089751 | 14091253 |
| chr8 | 14123735 | 14124543 |
| chr8 | 15026517 | 15029658 |
| chr8 | 17498786 | 17499542 |
| chr8 | 17909264 | 17910058 |
| chr8 | 18561619 | 18563415 |
| chr8 | 18594576 | 18596115 |
| chr8 | 18845683 | 18847309 |
| chr8 | 19417568 | 19418429 |
| chr8 | 19784273 | 19785293 |
| chr8 | 19892438 | 19893257 |
| chr8 | 20019504 | 20020758 |
| chr8 | 23099324 | 23100670 |
| chr8 | 23170225 | 23171622 |
| chr8 | 23302488 | 23304129 |
| chr8 | 23533049 | 23534258 |
| chr8 | 23586830 | 23588758 |
| chr8 | 23703448 | 23704966 |
| chr8 | 23730275 | 23731430 |
| chr8 | 23763085 | 23764487 |
| chr8 | 24521352 | 24523056 |
| chr8 | 25835435 | 25836576 |

|      |          |          |
|------|----------|----------|
| chr8 | 26058641 | 26059805 |
| chr8 | 26126730 | 26128065 |
| chr8 | 26218827 | 26220816 |
| chr8 | 26310774 | 26312664 |
| chr8 | 26417198 | 26418671 |
| chr8 | 26628991 | 26630421 |
| chr8 | 26670339 | 26671471 |
| chr8 | 26894566 | 26896459 |
| chr8 | 26950467 | 26952961 |
| chr8 | 26957403 | 26959107 |
| chr8 | 27020435 | 27021933 |
| chr8 | 27125235 | 27126611 |
| chr8 | 27267763 | 27269821 |
| chr8 | 27528778 | 27529940 |
| chr8 | 27775754 | 27776833 |
| chr8 | 28152469 | 28153747 |
| chr8 | 28170053 | 28172201 |
| chr8 | 28312554 | 28313561 |
| chr8 | 28369773 | 28372381 |
| chr8 | 28624682 | 28625408 |
| chr8 | 29503351 | 29504596 |
| chr8 | 30081299 | 30082448 |
| chr8 | 30304082 | 30304894 |
| chr8 | 31519550 | 31520252 |
| chr8 | 32149051 | 32150654 |
| chr8 | 33015742 | 33016560 |
| chr8 | 33118713 | 33120276 |
| chr8 | 33308524 | 33309707 |
| chr8 | 33824439 | 33825116 |
| chr8 | 34751576 | 34753482 |
| chr8 | 34995732 | 34996950 |
| chr8 | 35023857 | 35025621 |
| chr8 | 35140574 | 35142253 |
| chr8 | 35170418 | 35171932 |
| chr8 | 35209089 | 35210481 |
| chr8 | 35247833 | 35248863 |
| chr8 | 36027735 | 36029203 |
| chr8 | 36517275 | 36518768 |
| chr8 | 36557518 | 36559742 |
| chr8 | 37078932 | 37080135 |
| chr8 | 37270342 | 37271632 |
| chr8 | 37449677 | 37450578 |
| chr8 | 37610338 | 37614376 |

|      |          |          |
|------|----------|----------|
| chr8 | 37681867 | 37682704 |
| chr8 | 37698464 | 37699046 |
| chr8 | 40068278 | 40069629 |
| chr8 | 41508151 | 41510185 |
| chr8 | 41735031 | 41736627 |
| chr8 | 42324357 | 42325786 |
| chr8 | 42501969 | 42502887 |
| chr8 | 43625732 | 43626363 |
| chr8 | 44068259 | 44069305 |
| chr8 | 44390294 | 44391661 |
| chr8 | 45045813 | 45046983 |
| chr8 | 45318770 | 45319597 |
| chr8 | 46005133 | 46006681 |
| chr8 | 46020107 | 46021937 |
| chr8 | 46445476 | 46446892 |
| chr8 | 46513408 | 46514736 |
| chr8 | 46712661 | 46713677 |
| chr8 | 47084501 | 47086334 |
| chr8 | 47248027 | 47249809 |
| chr8 | 47295494 | 47297343 |
| chr8 | 47378306 | 47380337 |
| chr8 | 48372264 | 48374716 |
| chr8 | 48731982 | 48732724 |
| chr8 | 48758747 | 48761528 |
| chr8 | 48798203 | 48799778 |
| chr8 | 49304926 | 49307160 |
| chr8 | 49313069 | 49315533 |
| chr8 | 49825314 | 49826008 |
| chr8 | 50048872 | 50049555 |
| chr8 | 50241146 | 50241782 |
| chr8 | 50658578 | 50659444 |
| chr8 | 50802868 | 50803639 |
| chr8 | 52202312 | 52203795 |
| chr8 | 52420370 | 52421125 |
| chr8 | 54676651 | 54677606 |
| chr8 | 55685782 | 55686687 |
| chr8 | 56003201 | 56004068 |
| chr8 | 59028974 | 59031215 |
| chr8 | 59583455 | 59584220 |
| chr8 | 59600967 | 59601860 |
| chr8 | 59988904 | 59991675 |
| chr8 | 60866487 | 60868158 |
| chr8 | 61457595 | 61458354 |

|      |          |          |
|------|----------|----------|
| chr8 | 62359214 | 62360307 |
| chr8 | 62785765 | 62786770 |
| chr8 | 62795808 | 62797006 |
| chr8 | 64027846 | 64029657 |
| chr8 | 64640998 | 64641955 |
| chr8 | 64728938 | 64729826 |
| chr8 | 65554275 | 65554904 |
| chr8 | 66923989 | 66925012 |
| chr8 | 67170787 | 67172473 |
| chr8 | 67470842 | 67471908 |
| chr8 | 67708468 | 67709161 |
| chr8 | 67927077 | 67927671 |
| chr8 | 68114480 | 68115157 |
| chr8 | 68235525 | 68236121 |
| chr8 | 68807177 | 68808170 |
| chr8 | 69035289 | 69037054 |
| chr8 | 69558957 | 69559650 |
| chr8 | 70183954 | 70184531 |
| chr8 | 70984566 | 70985863 |
| chr8 | 71045289 | 71045977 |
| chr8 | 71611858 | 71613687 |
| chr8 | 71661359 | 71663630 |
| chr8 | 72108258 | 72109389 |
| chr8 | 72148765 | 72150149 |
| chr8 | 72239650 | 72241503 |
| chr8 | 72297692 | 72299468 |
| chr8 | 72301015 | 72302247 |
| chr8 | 72314220 | 72316082 |
| chr8 | 72355899 | 72357220 |
| chr8 | 72403178 | 72407708 |
| chr8 | 72424868 | 72427672 |
| chr8 | 72443784 | 72445574 |
| chr8 | 72565468 | 72567769 |
| chr8 | 72696040 | 72696705 |
| chr8 | 72757425 | 72758996 |
| chr8 | 72825809 | 72827191 |
| chr8 | 72853225 | 72856079 |
| chr8 | 72962159 | 72964135 |
| chr8 | 73000186 | 73001888 |
| chr8 | 73033594 | 73035359 |
| chr8 | 73046013 | 73047795 |
| chr8 | 73062435 | 73064782 |
| chr8 | 73121002 | 73123495 |

|      |          |          |
|------|----------|----------|
| chr8 | 73239942 | 73242914 |
| chr8 | 73291553 | 73294246 |
| chr8 | 73299592 | 73302213 |
| chr8 | 73391563 | 73394494 |
| chr8 | 73395195 | 73398831 |
| chr8 | 73419419 | 73422866 |
| chr8 | 73429103 | 73430841 |
| chr8 | 73435863 | 73439548 |
| chr8 | 73889901 | 73892440 |
| chr8 | 73908603 | 73910261 |
| chr8 | 73919681 | 73922063 |
| chr8 | 73929567 | 73931499 |
| chr8 | 73986562 | 73989858 |
| chr8 | 74103171 | 74106011 |
| chr8 | 74115027 | 74117833 |
| chr8 | 74134095 | 74136709 |
| chr8 | 74216081 | 74218140 |
| chr8 | 74405160 | 74406475 |
| chr8 | 74431583 | 74433556 |
| chr8 | 74446096 | 74447482 |
| chr8 | 74474456 | 74476069 |
| chr8 | 74659163 | 74661119 |
| chr8 | 74684224 | 74686423 |
| chr8 | 74763064 | 74764906 |
| chr8 | 74944433 | 74946524 |
| chr8 | 74998242 | 74999574 |
| chr8 | 75094217 | 75096825 |
| chr8 | 75246814 | 75248358 |
| chr8 | 75280058 | 75281887 |
| chr8 | 75368687 | 75369692 |
| chr8 | 77517135 | 77518838 |
| chr8 | 77607391 | 77608293 |
| chr8 | 77632303 | 77634711 |
| chr8 | 78111701 | 78112917 |
| chr8 | 78621372 | 78622075 |
| chr8 | 80430680 | 80431707 |
| chr8 | 80958228 | 80961227 |
| chr8 | 81031783 | 81034429 |
| chr8 | 81344310 | 81345443 |
| chr8 | 81551582 | 81553755 |
| chr8 | 81553828 | 81555517 |
| chr8 | 82162677 | 82164498 |
| chr8 | 82234599 | 82236140 |

|      |          |          |
|------|----------|----------|
| chr8 | 82642904 | 82643935 |
| chr8 | 82931938 | 82932691 |
| chr8 | 83261973 | 83263444 |
| chr8 | 83382873 | 83384155 |
| chr8 | 83402659 | 83405185 |
| chr8 | 83537618 | 83539710 |
| chr8 | 85268000 | 85269255 |
| chr8 | 85387084 | 85389274 |
| chr8 | 86191077 | 86193662 |
| chr8 | 86238348 | 86240064 |
| chr8 | 86262779 | 86266438 |
| chr8 | 86424543 | 86427215 |
| chr8 | 86478513 | 86480726 |
| chr8 | 86567521 | 86569325 |
| chr8 | 86589653 | 86591663 |
| chr8 | 86627856 | 86629558 |
| chr8 | 86703843 | 86705219 |
| chr8 | 86721249 | 86723059 |
| chr8 | 86726476 | 86728459 |
| chr8 | 86772785 | 86773987 |
| chr8 | 86779799 | 86781943 |
| chr8 | 87124694 | 87126177 |
| chr8 | 87183307 | 87187312 |
| chr8 | 87187789 | 87189729 |
| chr8 | 87211241 | 87212632 |
| chr8 | 87212727 | 87214124 |
| chr8 | 87253340 | 87255434 |
| chr8 | 87347291 | 87348177 |
| chr8 | 87355531 | 87357123 |
| chr8 | 87363799 | 87365377 |
| chr8 | 87380200 | 87381556 |
| chr8 | 87447302 | 87448266 |
| chr8 | 87489019 | 87491063 |
| chr8 | 87499747 | 87503231 |
| chr8 | 87513650 | 87515650 |
| chr8 | 87547807 | 87550063 |
| chr8 | 87550286 | 87551365 |
| chr8 | 87583668 | 87585216 |
| chr8 | 87594565 | 87597055 |
| chr8 | 87822476 | 87824948 |
| chr8 | 87945311 | 87946184 |
| chr8 | 88363794 | 88365614 |
| chr8 | 88377543 | 88378898 |

|      |           |           |
|------|-----------|-----------|
| chr8 | 88738013  | 88740275  |
| chr8 | 89268822  | 89270936  |
| chr8 | 89407909  | 89409954  |
| chr8 | 89972908  | 89974557  |
| chr8 | 89996597  | 89998140  |
| chr8 | 90461507  | 90463720  |
| chr8 | 91150437  | 91152557  |
| chr8 | 91575880  | 91577863  |
| chr8 | 91590840  | 91591914  |
| chr8 | 92395017  | 92396322  |
| chr8 | 93351741  | 93353337  |
| chr8 | 93478835  | 93479695  |
| chr8 | 93593332  | 93595243  |
| chr8 | 93657276  | 93660227  |
| chr8 | 93959836  | 93961415  |
| chr8 | 94527945  | 94529271  |
| chr8 | 94878928  | 94881219  |
| chr8 | 95483995  | 95486211  |
| chr8 | 95822701  | 95823385  |
| chr8 | 96107948  | 96109161  |
| chr8 | 96534985  | 96537140  |
| chr8 | 96559979  | 96561866  |
| chr8 | 96621297  | 96622792  |
| chr8 | 96694931  | 96697559  |
| chr8 | 96713538  | 96715942  |
| chr8 | 96909144  | 96911479  |
| chr8 | 97124503  | 97127050  |
| chr8 | 97219098  | 97220737  |
| chr8 | 97361399  | 97363154  |
| chr8 | 97603988  | 97606000  |
| chr8 | 98068608  | 98070579  |
| chr8 | 98117426  | 98118536  |
| chr8 | 98119629  | 98121212  |
| chr8 | 98236349  | 98238473  |
| chr8 | 98239295  | 98241126  |
| chr8 | 98305035  | 98306861  |
| chr8 | 98330604  | 98332724  |
| chr8 | 98574043  | 98575177  |
| chr8 | 100952462 | 100953414 |
| chr8 | 101222765 | 101223871 |
| chr8 | 101939079 | 101940721 |
| chr8 | 101989763 | 101991328 |
| chr8 | 106284855 | 106285747 |

|      |           |           |
|------|-----------|-----------|
| chr8 | 106774521 | 106775829 |
| chr8 | 106965696 | 106967706 |
| chr8 | 107057358 | 107059571 |
| chr8 | 107590151 | 107591167 |
| chr8 | 107782236 | 107784815 |
| chr8 | 107791741 | 107795701 |
| chr8 | 107821137 | 107822707 |
| chr8 | 107849342 | 107851037 |
| chr8 | 107897823 | 107901015 |
| chr8 | 108144913 | 108148100 |
| chr8 | 108159685 | 108161787 |
| chr8 | 108209720 | 108213112 |
| chr8 | 108231189 | 108233115 |
| chr8 | 108281438 | 108283168 |
| chr8 | 108350239 | 108351992 |
| chr8 | 108375209 | 108376380 |
| chr8 | 108378525 | 108380446 |
| chr8 | 108383283 | 108385386 |
| chr8 | 108423906 | 108425237 |
| chr8 | 108494442 | 108495930 |
| chr8 | 108502307 | 108503655 |
| chr8 | 108534320 | 108536413 |
| chr8 | 108673763 | 108675376 |
| chr8 | 108734028 | 108735573 |
| chr8 | 108929357 | 108930382 |
| chr8 | 108938769 | 108939974 |
| chr8 | 109039524 | 109041162 |
| chr8 | 109206379 | 109208128 |
| chr8 | 109415915 | 109418307 |
| chr8 | 109571343 | 109573142 |
| chr8 | 109579581 | 109581711 |
| chr8 | 109619550 | 109620967 |
| chr8 | 109631276 | 109633674 |
| chr8 | 109947893 | 109949316 |
| chr8 | 110111609 | 110112719 |
| chr8 | 111421667 | 111424287 |
| chr8 | 111434390 | 111435423 |
| chr8 | 111478579 | 111481042 |
| chr8 | 111884576 | 111885415 |
| chr8 | 112088773 | 112090665 |
| chr8 | 112131311 | 112133016 |
| chr8 | 112216283 | 112217937 |
| chr8 | 112228507 | 112230655 |



|      |           |           |
|------|-----------|-----------|
| chr8 | 112260775 | 112261966 |
| chr8 | 112301773 | 112303416 |
| chr8 | 112602744 | 112604395 |
| chr8 | 112624648 | 112626499 |
| chr8 | 112789962 | 112791303 |
| chr8 | 112814149 | 112815586 |
| chr8 | 113141705 | 113143431 |
| chr8 | 113369544 | 113371492 |
| chr8 | 113409655 | 113412238 |
| chr8 | 113554683 | 113556219 |
| chr8 | 113557034 | 113558471 |
| chr8 | 113579167 | 113581560 |
| chr8 | 113781764 | 113783926 |
| chr8 | 113823381 | 113824978 |
| chr8 | 114150332 | 114154032 |
| chr8 | 114534719 | 114536310 |
| chr8 | 115006669 | 115007877 |
| chr8 | 115321346 | 115322284 |
| chr8 | 115326717 | 115327464 |
| chr8 | 116728854 | 116730445 |
| chr8 | 117674179 | 117675305 |
| chr8 | 119197410 | 119199151 |
| chr8 | 119444389 | 119446509 |
| chr8 | 119466791 | 119468431 |
| chr8 | 119494983 | 119497115 |
| chr8 | 120026956 | 120028588 |
| chr8 | 120112889 | 120115087 |
| chr8 | 120157514 | 120159194 |
| chr8 | 120325148 | 120326438 |
| chr8 | 120457923 | 120459554 |
| chr8 | 121867582 | 121869094 |
| chr8 | 121882498 | 121883397 |
| chr8 | 121963369 | 121965521 |
| chr8 | 122081766 | 122083775 |
| chr8 | 122136154 | 122137633 |
| chr8 | 122363141 | 122364834 |
| chr8 | 122385075 | 122387179 |
| chr8 | 122433929 | 122435604 |
| chr8 | 122602628 | 122604966 |
| chr8 | 122811018 | 122814521 |
| chr8 | 122831994 | 122834311 |
| chr8 | 122856754 | 122862752 |
| chr8 | 122892400 | 122894379 |

|      |           |           |
|------|-----------|-----------|
| chr8 | 122900119 | 122901991 |
| chr8 | 123128323 | 123130614 |
| chr8 | 123631094 | 123633116 |
| chr8 | 123693777 | 123695778 |
| chr8 | 124073680 | 124076264 |
| chr8 | 124108504 | 124110161 |
| chr8 | 124113346 | 124115537 |
| chr8 | 124188897 | 124190436 |
| chr8 | 124192142 | 124194345 |
| chr8 | 124430482 | 124432345 |
| chr8 | 124446713 | 124448566 |
| chr8 | 124470075 | 124473011 |
| chr8 | 124473351 | 124475346 |
| chr8 | 124791804 | 124794622 |
| chr8 | 124899484 | 124901355 |
| chr8 | 124966342 | 124968976 |
| chr8 | 125074046 | 125076461 |
| chr8 | 125090627 | 125094887 |
| chr8 | 125134648 | 125136156 |
| chr8 | 125165861 | 125168228 |
| chr8 | 125393282 | 125394938 |
| chr8 | 125566018 | 125567068 |
| chr8 | 125588293 | 125590822 |
| chr8 | 125625433 | 125628185 |
| chr8 | 125695706 | 125696898 |
| chr8 | 125716818 | 125717898 |
| chr8 | 126001015 | 126003448 |
| chr8 | 126329017 | 126330990 |
| chr8 | 126415033 | 126417520 |
| chr8 | 126542731 | 126544217 |
| chr8 | 127044138 | 127045365 |
| chr8 | 127186001 | 127188074 |
| chr8 | 127245315 | 127246977 |
| chr8 | 127315978 | 127319467 |
| chr8 | 127385732 | 127387610 |
| chr8 | 127536171 | 127537741 |
| chr8 | 128193389 | 128195036 |
| chr8 | 128224261 | 128225226 |
| chr8 | 128421462 | 128422624 |
| chr8 | 128997806 | 128999899 |
| chr8 | 129020778 | 129022787 |
| chr8 | 129468411 | 129470666 |
| chr8 | 129494368 | 129495522 |

|      |           |           |
|------|-----------|-----------|
| chr8 | 129587210 | 129589614 |
| chr8 | 130518532 | 130519603 |
| chr8 | 131208909 | 131210541 |
| chr8 | 131376348 | 131378137 |
| chr9 | 3334916   | 3336335   |
| chr9 | 4259655   | 4261164   |
| chr9 | 7798234   | 7799346   |
| chr9 | 7836213   | 7838034   |
| chr9 | 8002977   | 8005003   |
| chr9 | 8042209   | 8043268   |
| chr9 | 8134004   | 8135060   |
| chr9 | 8366721   | 8367384   |
| chr9 | 8634099   | 8634903   |
| chr9 | 8899949   | 8902669   |
| chr9 | 9544967   | 9545585   |
| chr9 | 11277135  | 11278372  |
| chr9 | 11416903  | 11417472  |
| chr9 | 12739522  | 12740359  |
| chr9 | 13553140  | 13554504  |
| chr9 | 13630589  | 13633489  |
| chr9 | 13905891  | 13907118  |
| chr9 | 14184672  | 14186481  |
| chr9 | 14467009  | 14468334  |
| chr9 | 14535100  | 14536356  |
| chr9 | 14923336  | 14925179  |
| chr9 | 14974907  | 14975921  |
| chr9 | 15083766  | 15085274  |
| chr9 | 15161397  | 15162927  |
| chr9 | 15296697  | 15298733  |
| chr9 | 16256793  | 16257546  |
| chr9 | 16670412  | 16671516  |
| chr9 | 17777936  | 17778620  |
| chr9 | 18096162  | 18097288  |
| chr9 | 18583258  | 18584636  |
| chr9 | 19281045  | 19281680  |
| chr9 | 19426273  | 19427040  |
| chr9 | 20263254  | 20265093  |
| chr9 | 20385213  | 20386377  |
| chr9 | 20409612  | 20410331  |
| chr9 | 20411252  | 20412506  |
| chr9 | 20455538  | 20457433  |
| chr9 | 20692215  | 20695108  |
| chr9 | 20779411  | 20782456  |

|      |          |          |
|------|----------|----------|
| chr9 | 20806920 | 20808245 |
| chr9 | 20840616 | 20843390 |
| chr9 | 20877071 | 20878641 |
| chr9 | 20895289 | 20897658 |
| chr9 | 21028146 | 21029410 |
| chr9 | 21041007 | 21044375 |
| chr9 | 21047827 | 21050181 |
| chr9 | 21068841 | 21070703 |
| chr9 | 21171059 | 21174054 |
| chr9 | 21215789 | 21217247 |
| chr9 | 21258963 | 21262214 |
| chr9 | 21396355 | 21398486 |
| chr9 | 21563509 | 21565671 |
| chr9 | 21656010 | 21657789 |
| chr9 | 21759548 | 21761359 |
| chr9 | 21795436 | 21796980 |
| chr9 | 21806355 | 21808568 |
| chr9 | 22029526 | 22030863 |
| chr9 | 22066335 | 22068349 |
| chr9 | 22111040 | 22112752 |
| chr9 | 22131643 | 22133178 |
| chr9 | 22535893 | 22537176 |
| chr9 | 23088430 | 23089183 |
| chr9 | 24106322 | 24107806 |
| chr9 | 24500020 | 24501666 |
| chr9 | 25037485 | 25038180 |
| chr9 | 25058966 | 25061317 |
| chr9 | 25409965 | 25410578 |
| chr9 | 25566046 | 25566981 |
| chr9 | 26215614 | 26216512 |
| chr9 | 26562863 | 26563981 |
| chr9 | 26806660 | 26807969 |
| chr9 | 26836798 | 26838917 |
| chr9 | 26961797 | 26963653 |
| chr9 | 28342381 | 28343667 |
| chr9 | 28355129 | 28356144 |
| chr9 | 30728223 | 30730874 |
| chr9 | 30836527 | 30839188 |
| chr9 | 31086731 | 31089532 |
| chr9 | 31247885 | 31249704 |
| chr9 | 32811847 | 32812800 |
| chr9 | 34842143 | 34843809 |
| chr9 | 34983034 | 34984518 |

|      |          |          |
|------|----------|----------|
| chr9 | 35074413 | 35076482 |
| chr9 | 35228704 | 35229939 |
| chr9 | 35330884 | 35332306 |
| chr9 | 35365079 | 35367423 |
| chr9 | 35580890 | 35581664 |
| chr9 | 36610711 | 36611859 |
| chr9 | 36953336 | 36954907 |
| chr9 | 37191543 | 37194151 |
| chr9 | 37295914 | 37297959 |
| chr9 | 37420601 | 37421799 |
| chr9 | 38647886 | 38648484 |
| chr9 | 38772249 | 38773468 |
| chr9 | 39203395 | 39204404 |
| chr9 | 39591650 | 39592314 |
| chr9 | 40204298 | 40206036 |
| chr9 | 40606143 | 40607324 |
| chr9 | 40607849 | 40610313 |
| chr9 | 41757156 | 41758426 |
| chr9 | 41931064 | 41933467 |
| chr9 | 42003381 | 42004914 |
| chr9 | 42279396 | 42280884 |
| chr9 | 42704678 | 42707034 |
| chr9 | 43012835 | 43014813 |
| chr9 | 43377635 | 43379820 |
| chr9 | 43914913 | 43917737 |
| chr9 | 43921020 | 43921974 |
| chr9 | 43986212 | 43988233 |
| chr9 | 44041162 | 44043413 |
| chr9 | 44095079 | 44096695 |
| chr9 | 44133848 | 44136150 |
| chr9 | 44169086 | 44170349 |
| chr9 | 44214751 | 44216355 |
| chr9 | 44225257 | 44226694 |
| chr9 | 44301655 | 44303255 |
| chr9 | 44320508 | 44322560 |
| chr9 | 44411360 | 44414050 |
| chr9 | 44574854 | 44576695 |
| chr9 | 44580594 | 44581730 |
| chr9 | 44606455 | 44608246 |
| chr9 | 44816476 | 44818619 |
| chr9 | 44863003 | 44863851 |
| chr9 | 45791985 | 45793650 |
| chr9 | 45820389 | 45821970 |

|      |          |          |
|------|----------|----------|
| chr9 | 46068700 | 46069687 |
| chr9 | 46089865 | 46092282 |
| chr9 | 46324350 | 46326175 |
| chr9 | 47337671 | 47339609 |
| chr9 | 47387139 | 47387937 |
| chr9 | 47699646 | 47700987 |
| chr9 | 48287689 | 48289221 |
| chr9 | 48302738 | 48304784 |
| chr9 | 48345894 | 48347821 |
| chr9 | 48643150 | 48645051 |
| chr9 | 49522907 | 49523869 |
| chr9 | 49604343 | 49606949 |
| chr9 | 49978028 | 49979911 |
| chr9 | 50091208 | 50092861 |
| chr9 | 50410834 | 50413125 |
| chr9 | 50424273 | 50425882 |
| chr9 | 50582455 | 50584440 |
| chr9 | 50664173 | 50665947 |
| chr9 | 50815967 | 50817820 |
| chr9 | 51020637 | 51022056 |
| chr9 | 51086358 | 51087873 |
| chr9 | 51770484 | 51771940 |
| chr9 | 51855251 | 51857271 |
| chr9 | 52193048 | 52194010 |
| chr9 | 52485886 | 52488054 |
| chr9 | 52878035 | 52879933 |
| chr9 | 53417429 | 53419162 |
| chr9 | 53474257 | 53476098 |
| chr9 | 54204266 | 54205197 |
| chr9 | 54386372 | 54387208 |
| chr9 | 54546184 | 54548313 |
| chr9 | 54611972 | 54613865 |
| chr9 | 54647735 | 54650096 |
| chr9 | 54710849 | 54712242 |
| chr9 | 54996431 | 54998726 |
| chr9 | 55485445 | 55486471 |
| chr9 | 55784835 | 55786193 |
| chr9 | 56008108 | 56009790 |
| chr9 | 56264718 | 56266823 |
| chr9 | 56744311 | 56747348 |
| chr9 | 56842301 | 56844814 |
| chr9 | 56919805 | 56922343 |
| chr9 | 56922626 | 56925492 |

|      |          |          |
|------|----------|----------|
| chr9 | 56977964 | 56979789 |
| chr9 | 56995021 | 56997140 |
| chr9 | 57009649 | 57011322 |
| chr9 | 57039256 | 57040719 |
| chr9 | 57077378 | 57078690 |
| chr9 | 57350315 | 57353204 |
| chr9 | 57368155 | 57370224 |
| chr9 | 57384518 | 57386506 |
| chr9 | 57757779 | 57759428 |
| chr9 | 58094597 | 58095548 |
| chr9 | 58133795 | 58135197 |
| chr9 | 58158869 | 58161267 |
| chr9 | 58362456 | 58363646 |
| chr9 | 58706480 | 58708694 |
| chr9 | 59200408 | 59201651 |
| chr9 | 59333065 | 59335057 |
| chr9 | 59386786 | 59388550 |
| chr9 | 59425373 | 59427332 |
| chr9 | 59503574 | 59506193 |
| chr9 | 60044017 | 60046263 |
| chr9 | 60879423 | 60882101 |
| chr9 | 60916410 | 60918087 |
| chr9 | 61162247 | 61163998 |
| chr9 | 61213476 | 61214495 |
| chr9 | 61217615 | 61223095 |
| chr9 | 61318303 | 61320010 |
| chr9 | 62188329 | 62193139 |
| chr9 | 62658096 | 62660652 |
| chr9 | 62827657 | 62829219 |
| chr9 | 62990933 | 62995337 |
| chr9 | 63009314 | 63010374 |
| chr9 | 63224526 | 63226439 |
| chr9 | 63449532 | 63451147 |
| chr9 | 63604362 | 63606717 |
| chr9 | 63726600 | 63728346 |
| chr9 | 64020026 | 64021935 |
| chr9 | 64115969 | 64117215 |
| chr9 | 64128614 | 64130474 |
| chr9 | 64187808 | 64189685 |
| chr9 | 64584449 | 64586071 |
| chr9 | 64658384 | 64660097 |
| chr9 | 64765501 | 64766933 |
| chr9 | 64807755 | 64809855 |

|      |          |          |
|------|----------|----------|
| chr9 | 64948234 | 64950466 |
| chr9 | 64975443 | 64977363 |
| chr9 | 65003984 | 65005914 |
| chr9 | 65041019 | 65042561 |
| chr9 | 65219158 | 65220316 |
| chr9 | 65237387 | 65239784 |
| chr9 | 65245932 | 65247189 |
| chr9 | 65478299 | 65479921 |
| chr9 | 65518902 | 65519982 |
| chr9 | 65732417 | 65733269 |
| chr9 | 65737644 | 65739067 |
| chr9 | 65971562 | 65973031 |
| chr9 | 65974014 | 65975307 |
| chr9 | 66358497 | 66360716 |
| chr9 | 66360767 | 66362915 |
| chr9 | 66792849 | 66794745 |
| chr9 | 66890886 | 66892666 |
| chr9 | 68500623 | 68503513 |
| chr9 | 69137268 | 69139328 |
| chr9 | 69245102 | 69246488 |
| chr9 | 69606264 | 69609137 |
| chr9 | 69615589 | 69616731 |
| chr9 | 69859952 | 69861541 |
| chr9 | 70044230 | 70045278 |
| chr9 | 70121585 | 70123259 |
| chr9 | 70389710 | 70391871 |
| chr9 | 70503965 | 70505463 |
| chr9 | 70526198 | 70527893 |
| chr9 | 71332831 | 71334366 |
| chr9 | 71339595 | 71341216 |
| chr9 | 71958209 | 71960545 |
| chr9 | 71980407 | 71981625 |
| chr9 | 72121475 | 72124067 |
| chr9 | 72339269 | 72340544 |
| chr9 | 72378136 | 72381222 |
| chr9 | 72509338 | 72511570 |
| chr9 | 72588513 | 72590219 |
| chr9 | 72614091 | 72615350 |
| chr9 | 72792869 | 72793688 |
| chr9 | 73823589 | 73824429 |
| chr9 | 73925634 | 73927057 |
| chr9 | 74649373 | 74650721 |
| chr9 | 74917571 | 74919966 |



|      |          |          |
|------|----------|----------|
| chr9 | 75079475 | 75080936 |
| chr9 | 75256661 | 75258455 |
| chr9 | 75406485 | 75407931 |
| chr9 | 75472790 | 75474291 |
| chr9 | 75531398 | 75532280 |
| chr9 | 76697926 | 76698805 |
| chr9 | 77597636 | 77599212 |
| chr9 | 77853801 | 77854977 |
| chr9 | 77955604 | 77957218 |
| chr9 | 78014204 | 78015781 |
| chr9 | 78023058 | 78025098 |
| chr9 | 78037955 | 78041338 |
| chr9 | 78243147 | 78244376 |
| chr9 | 78295527 | 78297016 |
| chr9 | 78303934 | 78306148 |
| chr9 | 78327638 | 78330862 |
| chr9 | 78367635 | 78369560 |
| chr9 | 78435232 | 78436990 |
| chr9 | 78463051 | 78464102 |
| chr9 | 79640621 | 79641860 |
| chr9 | 79914338 | 79916123 |
| chr9 | 80179601 | 80180592 |
| chr9 | 80211887 | 80212869 |
| chr9 | 81524628 | 81527922 |
| chr9 | 81830467 | 81831284 |
| chr9 | 81930786 | 81931662 |
| chr9 | 82252140 | 82252751 |
| chr9 | 82369802 | 82370491 |
| chr9 | 82504111 | 82504949 |
| chr9 | 82719160 | 82720586 |
| chr9 | 82722468 | 82724356 |
| chr9 | 82944159 | 82946037 |
| chr9 | 83038506 | 83040541 |
| chr9 | 83584011 | 83584669 |
| chr9 | 83818354 | 83819720 |
| chr9 | 85642008 | 85643589 |
| chr9 | 85791725 | 85792870 |
| chr9 | 86021782 | 86022435 |
| chr9 | 86357484 | 86358985 |
| chr9 | 86692437 | 86694333 |
| chr9 | 86819320 | 86820555 |
| chr9 | 86936010 | 86937080 |
| chr9 | 87289113 | 87291052 |

|      |          |          |
|------|----------|----------|
| chr9 | 87514723 | 87515379 |
| chr9 | 87810737 | 87812281 |
| chr9 | 88375863 | 88377624 |
| chr9 | 88416526 | 88418549 |
| chr9 | 88442627 | 88444361 |
| chr9 | 89599162 | 89600517 |
| chr9 | 89721422 | 89722914 |
| chr9 | 90007758 | 90010202 |
| chr9 | 90035793 | 90037833 |
| chr9 | 91275895 | 91277257 |
| chr9 | 91462211 | 91463244 |
| chr9 | 92144272 | 92145722 |
| chr9 | 92347913 | 92348592 |
| chr9 | 92436373 | 92437932 |
| chr9 | 93329437 | 93330022 |
| chr9 | 93812553 | 93813147 |
| chr9 | 95410908 | 95413492 |
| chr9 | 95460354 | 95461654 |
| chr9 | 95511869 | 95513429 |
| chr9 | 95537411 | 95539081 |
| chr9 | 95649665 | 95651138 |
| chr9 | 95757752 | 95759306 |
| chr9 | 96018776 | 96020482 |
| chr9 | 96378069 | 96381077 |
| chr9 | 96391950 | 96393025 |
| chr9 | 96530896 | 96532687 |
| chr9 | 96613809 | 96615765 |
| chr9 | 96619569 | 96620986 |
| chr9 | 96629783 | 96631068 |
| chr9 | 96651761 | 96653831 |
| chr9 | 96695634 | 96696357 |
| chr9 | 96736593 | 96740908 |
| chr9 | 96917916 | 96920633 |
| chr9 | 96955832 | 96957665 |
| chr9 | 97010383 | 97012481 |
| chr9 | 97240406 | 97241536 |
| chr9 | 98150093 | 98150855 |
| chr9 | 98398534 | 98399893 |
| chr9 | 98463406 | 98464799 |
| chr9 | 98501440 | 98502523 |
| chr9 | 98742215 | 98743528 |
| chr9 | 98756022 | 98757804 |
| chr9 | 98764633 | 98766240 |

|      |           |           |
|------|-----------|-----------|
| chr9 | 98855468  | 98858062  |
| chr9 | 98879462  | 98881253  |
| chr9 | 99118260  | 99119339  |
| chr9 | 99318352  | 99319735  |
| chr9 | 99468251  | 99469593  |
| chr9 | 99973730  | 99974624  |
| chr9 | 100345608 | 100347428 |
| chr9 | 100542464 | 100544919 |
| chr9 | 100934127 | 100936262 |
| chr9 | 100977214 | 100979347 |
| chr9 | 102527702 | 102529619 |
| chr9 | 102591403 | 102593409 |
| chr9 | 102619093 | 102621427 |
| chr9 | 102931219 | 102933477 |
| chr9 | 102999425 | 103000315 |
| chr9 | 103103752 | 103105250 |
| chr9 | 103267321 | 103268824 |
| chr9 | 103937148 | 103938657 |
| chr9 | 104000884 | 104002278 |
| chr9 | 104164457 | 104166022 |
| chr9 | 104178883 | 104180257 |
| chr9 | 105032971 | 105034770 |
| chr9 | 105396600 | 105398600 |
| chr9 | 105500583 | 105502151 |
| chr9 | 105786319 | 105787598 |
| chr9 | 106043708 | 106045284 |
| chr9 | 106072364 | 106074861 |
| chr9 | 106101288 | 106102920 |
| chr9 | 106270471 | 106272975 |
| chr9 | 106323599 | 106324687 |
| chr9 | 106331184 | 106333209 |
| chr9 | 106356398 | 106358550 |
| chr9 | 106365323 | 106368888 |
| chr9 | 106378864 | 106380712 |
| chr9 | 106468559 | 106469650 |
| chr9 | 106546786 | 106548600 |
| chr9 | 106723152 | 106725093 |
| chr9 | 106793615 | 106795299 |
| chr9 | 107065072 | 107065770 |
| chr9 | 107488932 | 107491059 |
| chr9 | 107528538 | 107531224 |
| chr9 | 107534707 | 107537378 |
| chr9 | 107553177 | 107554780 |

|      |           |           |
|------|-----------|-----------|
| chr9 | 107672330 | 107674012 |
| chr9 | 107904326 | 107906461 |
| chr9 | 108198526 | 108199891 |
| chr9 | 108207237 | 108209409 |
| chr9 | 108249520 | 108250702 |
| chr9 | 108294393 | 108296336 |
| chr9 | 108362363 | 108363935 |
| chr9 | 108409738 | 108411332 |
| chr9 | 108418657 | 108420822 |
| chr9 | 108468246 | 108471620 |
| chr9 | 108498581 | 108500768 |
| chr9 | 108556296 | 108557862 |
| chr9 | 108685038 | 108687048 |
| chr9 | 108725886 | 108730834 |
| chr9 | 108733712 | 108736044 |
| chr9 | 108838177 | 108839526 |
| chr9 | 108996734 | 108999665 |
| chr9 | 109212529 | 109213443 |
| chr9 | 109777467 | 109779206 |
| chr9 | 110002829 | 110003984 |
| chr9 | 110018993 | 110020783 |
| chr9 | 110034166 | 110035631 |
| chr9 | 110206841 | 110209047 |
| chr9 | 110309490 | 110311525 |
| chr9 | 110558292 | 110559683 |
| chr9 | 110736607 | 110737886 |
| chr9 | 110759276 | 110761225 |
| chr9 | 110775794 | 110777357 |
| chr9 | 111172854 | 111175335 |
| chr9 | 112020374 | 112021693 |
| chr9 | 113649572 | 113651457 |
| chr9 | 113934784 | 113936857 |
| chr9 | 113954373 | 113957419 |
| chr9 | 114309114 | 114311374 |
| chr9 | 114393487 | 114394593 |
| chr9 | 114408484 | 114411059 |
| chr9 | 114471222 | 114473321 |
| chr9 | 114548395 | 114550434 |
| chr9 | 114597182 | 114599054 |
| chr9 | 114690068 | 114692057 |
| chr9 | 114875188 | 114877402 |
| chr9 | 115078000 | 115080558 |
| chr9 | 115218027 | 115220419 |

|      |           |           |
|------|-----------|-----------|
| chr9 | 117496039 | 117497067 |
| chr9 | 118058561 | 118060037 |
| chr9 | 118130661 | 118132347 |
| chr9 | 118385628 | 118389380 |
| chr9 | 118414563 | 118416732 |
| chr9 | 119230120 | 119232794 |
| chr9 | 119311515 | 119313089 |
| chr9 | 119353504 | 119355080 |
| chr9 | 119420077 | 119423424 |
| chr9 | 119474722 | 119476384 |
| chr9 | 119476547 | 119478199 |
| chr9 | 119802890 | 119805104 |
| chr9 | 119845708 | 119847584 |
| chr9 | 119865225 | 119866741 |
| chr9 | 119960264 | 119961621 |
| chr9 | 120036072 | 120037818 |
| chr9 | 120401060 | 120402626 |
| chr9 | 120479376 | 120481844 |
| chr9 | 120641014 | 120643556 |
| chr9 | 120668223 | 120669310 |
| chr9 | 120841402 | 120842870 |
| chr9 | 121016440 | 121018305 |
| chr9 | 121185616 | 121187934 |
| chr9 | 121522827 | 121524594 |
| chr9 | 121627118 | 121629722 |
| chr9 | 121686334 | 121688214 |
| chr9 | 121765695 | 121768087 |
| chr9 | 121891481 | 121893606 |
| chr9 | 122260095 | 122261558 |
| chr9 | 122477520 | 122479879 |
| chr9 | 122774546 | 122775505 |
| chr9 | 122831477 | 122832690 |
| chr9 | 122859353 | 122861057 |
| chr9 | 122929439 | 122931362 |
| chr9 | 123021539 | 123023232 |
| chr9 | 123275451 | 123276885 |
| chr9 | 123626162 | 123627331 |
| chr9 | 123760200 | 123761825 |
| chrX | 5659392   | 5661007   |
| chrX | 5976482   | 5978184   |
| chrX | 6149651   | 6150294   |
| chrX | 7149921   | 7152369   |
| chrX | 7244075   | 7244939   |

|      |          |          |
|------|----------|----------|
| chrX | 7247411  | 7248679  |
| chrX | 7273900  | 7274764  |
| chrX | 7291273  | 7292101  |
| chrX | 7302885  | 7304418  |
| chrX | 7366708  | 7367570  |
| chrX | 7527327  | 7528683  |
| chrX | 7554537  | 7555350  |
| chrX | 7650711  | 7652637  |
| chrX | 7673171  | 7674594  |
| chrX | 7708388  | 7710938  |
| chrX | 7721288  | 7723395  |
| chrX | 10101610 | 10102306 |
| chrX | 11583063 | 11584300 |
| chrX | 11664000 | 11665409 |
| chrX | 11716522 | 11718149 |
| chrX | 12228978 | 12230102 |
| chrX | 12338452 | 12340081 |
| chrX | 12414413 | 12415506 |
| chrX | 12647803 | 12650462 |
| chrX | 12818151 | 12820462 |
| chrX | 12857215 | 12858910 |
| chrX | 12923849 | 12925266 |
| chrX | 13038006 | 13039767 |
| chrX | 13062370 | 13064595 |
| chrX | 15373053 | 15374146 |
| chrX | 17148411 | 17149843 |
| chrX | 17432280 | 17433798 |
| chrX | 17738784 | 17741692 |
| chrX | 18373607 | 18374264 |
| chrX | 19407968 | 19408556 |
| chrX | 19636880 | 19638317 |
| chrX | 20002108 | 20003750 |
| chrX | 20193924 | 20195582 |
| chrX | 20239335 | 20241175 |
| chrX | 20264470 | 20266355 |
| chrX | 20280384 | 20282213 |
| chrX | 20352175 | 20353155 |
| chrX | 20375115 | 20376300 |
| chrX | 20395809 | 20397640 |
| chrX | 20425056 | 20426342 |
| chrX | 20638647 | 20639712 |
| chrX | 20822805 | 20823437 |
| chrX | 22111204 | 22111857 |

|      |          |          |
|------|----------|----------|
| chrX | 23111723 | 23112545 |
| chrX | 23269503 | 23270981 |
| chrX | 33362162 | 33362924 |
| chrX | 33427844 | 33429714 |
| chrX | 33565418 | 33566266 |
| chrX | 33868265 | 33869506 |
| chrX | 34137419 | 34139343 |
| chrX | 34335054 | 34336821 |
| chrX | 34347351 | 34348499 |
| chrX | 34614388 | 34615459 |
| chrX | 34624207 | 34626168 |
| chrX | 34649749 | 34650920 |
| chrX | 34730843 | 34732529 |
| chrX | 35473490 | 35475429 |
| chrX | 35916862 | 35918919 |
| chrX | 36136859 | 36137709 |
| chrX | 36233956 | 36234641 |
| chrX | 38533794 | 38534757 |
| chrX | 39264313 | 39265572 |
| chrX | 39502018 | 39504300 |
| chrX | 39771807 | 39772410 |
| chrX | 39842414 | 39844078 |
| chrX | 40561845 | 40562355 |
| chrX | 41032924 | 41034080 |
| chrX | 44708719 | 44709371 |
| chrX | 45387036 | 45388560 |
| chrX | 45815404 | 45816680 |
| chrX | 45946894 | 45948668 |
| chrX | 45961225 | 45962849 |
| chrX | 46115076 | 46115815 |
| chrX | 47040267 | 47041088 |
| chrX | 47919292 | 47920259 |
| chrX | 47929818 | 47930789 |
| chrX | 47943477 | 47944501 |
| chrX | 47950004 | 47951287 |
| chrX | 47964737 | 47965774 |
| chrX | 47972364 | 47974296 |
| chrX | 48750074 | 48751148 |
| chrX | 49966284 | 49967868 |
| chrX | 50143784 | 50144687 |
| chrX | 50340649 | 50342109 |
| chrX | 50621905 | 50623805 |
| chrX | 51019311 | 51020568 |

|      |          |          |
|------|----------|----------|
| chrX | 51058889 | 51061080 |
| chrX | 51077485 | 51079878 |
| chrX | 51277485 | 51278653 |
| chrX | 53627323 | 53628545 |
| chrX | 53707823 | 53709456 |
| chrX | 53850267 | 53851730 |
| chrX | 53984892 | 53986079 |
| chrX | 54074777 | 54076037 |
| chrX | 54133840 | 54134387 |
| chrX | 54306053 | 54307501 |
| chrX | 54645198 | 54646385 |
| chrX | 54661761 | 54662670 |
| chrX | 54858225 | 54858807 |
| chrX | 54895192 | 54896263 |
| chrX | 55282644 | 55284926 |
| chrX | 55290653 | 55293092 |
| chrX | 56054385 | 56055145 |
| chrX | 57040232 | 57040953 |
| chrX | 57800868 | 57802207 |
| chrX | 58511706 | 58512343 |
| chrX | 58962415 | 58963839 |
| chrX | 59450205 | 59451257 |
| chrX | 59869850 | 59870606 |
| chrX | 63746341 | 63747081 |
| chrX | 64266220 | 64266819 |
| chrX | 66014694 | 66015779 |
| chrX | 66400313 | 66400970 |
| chrX | 66499512 | 66500004 |
| chrX | 67191309 | 67191944 |
| chrX | 68617204 | 68618526 |
| chrX | 68808375 | 68810444 |
| chrX | 69817830 | 69818579 |
| chrX | 69930644 | 69931166 |
| chrX | 70253465 | 70254010 |
| chrX | 70299059 | 70299856 |
| chrX | 70473288 | 70475026 |
| chrX | 70645906 | 70647539 |
| chrX | 70679071 | 70680186 |
| chrX | 70703227 | 70705029 |
| chrX | 71031471 | 71033435 |
| chrX | 71043268 | 71044375 |
| chrX | 71210626 | 71213717 |
| chrX | 71244201 | 71245160 |



|      |          |          |
|------|----------|----------|
| chrX | 71268350 | 71269895 |
| chrX | 71329998 | 71331820 |
| chrX | 71515157 | 71516977 |
| chrX | 71542154 | 71542942 |
| chrX | 71549895 | 71551317 |
| chrX | 71638039 | 71638888 |
| chrX | 72341002 | 72342518 |
| chrX | 72348447 | 72349855 |
| chrX | 72446374 | 72447131 |
| chrX | 72547942 | 72548600 |
| chrX | 72627398 | 72628234 |
| chrX | 72661318 | 72662589 |
| chrX | 72759082 | 72760301 |
| chrX | 72917983 | 72920094 |
| chrX | 73004027 | 73004951 |
| chrX | 73211067 | 73212783 |
| chrX | 74642937 | 74643487 |
| chrX | 75040408 | 75042645 |
| chrX | 77064535 | 77065287 |
| chrX | 78315487 | 78316931 |
| chrX | 81140222 | 81140831 |
| chrX | 82377872 | 82379053 |
| chrX | 82818672 | 82820071 |
| chrX | 83009992 | 83011060 |
| chrX | 84143703 | 84144320 |
| chrX | 85083523 | 85084241 |
| chrX | 87630258 | 87630969 |
| chrX | 88020283 | 88020864 |
| chrX | 88090625 | 88091606 |
| chrX | 90188494 | 90189147 |
| chrX | 90877002 | 90878066 |
| chrX | 91166994 | 91168400 |
| chrX | 91366729 | 91368996 |
| chrX | 91457256 | 91458545 |
| chrX | 91479248 | 91481086 |
| chrX | 91785597 | 91787997 |
| chrX | 91880936 | 91882242 |
| chrX | 92193807 | 92194742 |
| chrX | 92220846 | 92222702 |
| chrX | 93574296 | 93575001 |
| chrX | 95417518 | 95418295 |
| chrX | 96085366 | 96086757 |
| chrX | 96131947 | 96134113 |

|      |           |           |
|------|-----------|-----------|
| chrX | 97014680  | 97015964  |
| chrX | 97489515  | 97490580  |
| chrX | 97623779  | 97625700  |
| chrX | 97689116  | 97690594  |
| chrX | 97960134  | 97961230  |
| chrX | 98060881  | 98061434  |
| chrX | 98469142  | 98470127  |
| chrX | 98527330  | 98528835  |
| chrX | 98834774  | 98836522  |
| chrX | 98890533  | 98892293  |
| chrX | 98892790  | 98894192  |
| chrX | 100381197 | 100382616 |
| chrX | 100422661 | 100423664 |
| chrX | 100551531 | 100552644 |
| chrX | 100642548 | 100644218 |
| chrX | 100644444 | 100645822 |
| chrX | 100676582 | 100678007 |
| chrX | 101175140 | 101177599 |
| chrX | 101361844 | 101363068 |
| chrX | 101395184 | 101396851 |
| chrX | 101608172 | 101609733 |
| chrX | 102051791 | 102053173 |
| chrX | 102056543 | 102057756 |
| chrX | 102315682 | 102317761 |
| chrX | 102958279 | 102959492 |
| chrX | 103123997 | 103125061 |
| chrX | 103206554 | 103208002 |
| chrX | 103210671 | 103211704 |
| chrX | 103414293 | 103415739 |
| chrX | 104252185 | 104253294 |
| chrX | 105010878 | 105012060 |
| chrX | 107611920 | 107612573 |
| chrX | 109714045 | 109715718 |
| chrX | 110298019 | 110299497 |
| chrX | 110465217 | 110465886 |
| chrX | 116622839 | 116623770 |
| chrX | 117040527 | 117041290 |
| chrX | 117498922 | 117499504 |
| chrX | 117793860 | 117794415 |
| chrX | 120216602 | 120217624 |
| chrX | 124767722 | 124768291 |
| chrX | 126283789 | 126285142 |
| chrX | 126444579 | 126445490 |

|      |           |           |
|------|-----------|-----------|
| chrX | 126738288 | 126739022 |
| chrX | 127066303 | 127067007 |
| chrX | 130431897 | 130433124 |
| chrX | 130593222 | 130594507 |
| chrX | 131009832 | 131011405 |
| chrX | 131146481 | 131147922 |
| chrX | 131220769 | 131221848 |
| chrX | 131252545 | 131253639 |
| chrX | 131284846 | 131286197 |
| chrX | 131341908 | 131343752 |
| chrX | 131543318 | 131544313 |
| chrX | 132259038 | 132259978 |
| chrX | 132419795 | 132421256 |
| chrX | 132706670 | 132707572 |
| chrX | 133242246 | 133243875 |
| chrX | 133274974 | 133276884 |
| chrX | 135867914 | 135869468 |
| chrX | 136405462 | 136407047 |
| chrX | 136990251 | 136992408 |
| chrX | 137134214 | 137135422 |
| chrX | 138182019 | 138182735 |
| chrX | 139149282 | 139150189 |
| chrX | 140662643 | 140663333 |
| chrX | 143987822 | 143989051 |
| chrX | 146875257 | 146876292 |
| chrX | 146964167 | 146964916 |
| chrX | 147451044 | 147453009 |
| chrX | 147530400 | 147531515 |
| chrX | 147602709 | 147603899 |
| chrX | 147777892 | 147779944 |
| chrX | 147954668 | 147956311 |
| chrX | 148176906 | 148177536 |
| chrX | 148236689 | 148239465 |
| chrX | 148436059 | 148437201 |
| chrX | 148667273 | 148668842 |
| chrX | 148776175 | 148777706 |
| chrX | 149215816 | 149217288 |
| chrX | 149441013 | 149442405 |
| chrX | 149573998 | 149575262 |
| chrX | 149932048 | 149934880 |
| chrX | 150157719 | 150158555 |
| chrX | 151662024 | 151663275 |
| chrX | 152498397 | 152499147 |

|      |           |           |
|------|-----------|-----------|
| chrX | 155038346 | 155039118 |
| chrX | 155307472 | 155308406 |
| chrX | 155692804 | 155694602 |
| chrX | 155809491 | 155810954 |
| chrX | 155947927 | 155948992 |
| chrX | 157097168 | 157097786 |
| chrX | 157500309 | 157501422 |
| chrX | 157599977 | 157601680 |
| chrX | 157985076 | 157985679 |
| chrX | 159172794 | 159174143 |
| chrX | 159197114 | 159198781 |
| chrX | 159266706 | 159267929 |
| chrX | 162916476 | 162918416 |
| chrX | 162947716 | 162949091 |
| chrX | 163650560 | 163651666 |
| chrX | 163668648 | 163669766 |
| chrX | 165849111 | 165849724 |
| chrY | 346621    | 347440    |
| chrY | 581378    | 582543    |

**Table S3. YY1 CLIP-seq enriched regions.**

|      |          |          |
|------|----------|----------|
| chr1 | 4519097  | 4519230  |
| chr1 | 4847937  | 4848117  |
| chr1 | 4849565  | 4849772  |
| chr1 | 5073237  | 5073455  |
| chr1 | 6204742  | 6205193  |
| chr1 | 7081868  | 7082269  |
| chr1 | 8929074  | 8929522  |
| chr1 | 9918215  | 9918379  |
| chr1 | 10050907 | 10051107 |
| chr1 | 12365037 | 12365157 |
| chr1 | 13059976 | 13060349 |
| chr1 | 13060794 | 13061070 |
| chr1 | 16095506 | 16095867 |
| chr1 | 20888688 | 20888810 |
| chr1 | 24618719 | 24619347 |
| chr1 | 32645456 | 32645547 |
| chr1 | 33479593 | 33479691 |
| chr1 | 34067813 | 34069252 |
| chr1 | 34073727 | 34073819 |
| chr1 | 34117148 | 34117415 |
| chr1 | 34134080 | 34134345 |
| chr1 | 34154170 | 34154445 |
| chr1 | 34170771 | 34170898 |
| chr1 | 34201353 | 34202028 |
| chr1 | 34233888 | 34234367 |
| chr1 | 34244777 | 34247562 |
| chr1 | 34257562 | 34258302 |
| chr1 | 34314560 | 34314919 |
| chr1 | 34364316 | 34364805 |
| chr1 | 34516724 | 34516931 |
| chr1 | 34916572 | 34916680 |
| chr1 | 36125234 | 36126674 |
| chr1 | 36161012 | 36162147 |
| chr1 | 36569121 | 36569720 |
| chr1 | 36582529 | 36582860 |
| chr1 | 37062312 | 37062453 |
| chr1 | 37487029 | 37487270 |
| chr1 | 38081187 | 38081495 |
| chr1 | 39424759 | 39424991 |
| chr1 | 39425138 | 39425719 |
| chr1 | 39425940 | 39426544 |

|      |          |          |
|------|----------|----------|
| chr1 | 39576377 | 39576643 |
| chr1 | 39959032 | 39959880 |
| chr1 | 42754081 | 42754176 |
| chr1 | 43170487 | 43170612 |
| chr1 | 43502639 | 43502818 |
| chr1 | 44023266 | 44023650 |
| chr1 | 44255520 | 44255804 |
| chr1 | 44608840 | 44609020 |
| chr1 | 45405663 | 45405889 |
| chr1 | 45803746 | 45803911 |
| chr1 | 45853070 | 45853428 |
| chr1 | 45853900 | 45854205 |
| chr1 | 46431079 | 46431194 |
| chr1 | 47487756 | 47487841 |
| chr1 | 55145020 | 55145290 |
| chr1 | 59539263 | 59539877 |
| chr1 | 59741835 | 59742138 |
| chr1 | 59748766 | 59749046 |
| chr1 | 59749195 | 59749691 |
| chr1 | 59752430 | 59752555 |
| chr1 | 59761031 | 59761361 |
| chr1 | 59761617 | 59761787 |
| chr1 | 59820410 | 59821084 |
| chr1 | 59883656 | 59883871 |
| chr1 | 60155188 | 60155424 |
| chr1 | 60248958 | 60249108 |
| chr1 | 60291840 | 60291974 |
| chr1 | 60316886 | 60317093 |
| chr1 | 63223673 | 63224022 |
| chr1 | 63225119 | 63225760 |
| chr1 | 63294852 | 63295153 |
| chr1 | 63296612 | 63296707 |
| chr1 | 63320058 | 63320515 |
| chr1 | 63492415 | 63493312 |
| chr1 | 63537421 | 63537789 |
| chr1 | 63542328 | 63542963 |
| chr1 | 63550128 | 63550806 |
| chr1 | 63559030 | 63559412 |
| chr1 | 63606163 | 63606598 |
| chr1 | 63614715 | 63615179 |
| chr1 | 63624043 | 63624753 |
| chr1 | 63638208 | 63638824 |
| chr1 | 64737517 | 64737956 |

|      |          |          |
|------|----------|----------|
| chr1 | 64737974 | 64738373 |
| chr1 | 65285784 | 65285875 |
| chr1 | 65292912 | 65293333 |
| chr1 | 65294181 | 65294266 |
| chr1 | 65323941 | 65324470 |
| chr1 | 66747514 | 66748021 |
| chr1 | 66786303 | 66786576 |
| chr1 | 72272812 | 72273062 |
| chr1 | 72283518 | 72283769 |
| chr1 | 72290439 | 72291165 |
| chr1 | 72301580 | 72301946 |
| chr1 | 72354047 | 72354474 |
| chr1 | 72424534 | 72425422 |
| chr1 | 72427501 | 72427808 |
| chr1 | 72766621 | 72767518 |
| chr1 | 72785389 | 72786246 |
| chr1 | 72794232 | 72794667 |
| chr1 | 72818499 | 72818644 |
| chr1 | 72871064 | 72871924 |
| chr1 | 72895276 | 72895927 |
| chr1 | 72898584 | 72899070 |
| chr1 | 74283078 | 74283741 |
| chr1 | 74298337 | 74298565 |
| chr1 | 74300430 | 74300761 |
| chr1 | 74399166 | 74400179 |
| chr1 | 74552932 | 74553380 |
| chr1 | 74725740 | 74726391 |
| chr1 | 75209390 | 75209664 |
| chr1 | 75240775 | 75241422 |
| chr1 | 75381760 | 75382142 |
| chr1 | 75437174 | 75437948 |
| chr1 | 75532696 | 75532815 |
| chr1 | 80132040 | 80132180 |
| chr1 | 82836040 | 82836946 |
| chr1 | 82870013 | 82870196 |
| chr1 | 84836572 | 84836856 |
| chr1 | 85283088 | 85283318 |
| chr1 | 87690363 | 87691141 |
| chr1 | 87804223 | 87804611 |
| chr1 | 87804793 | 87805215 |
| chr1 | 87978716 | 87978826 |
| chr1 | 87983863 | 87984041 |
| chr1 | 88023248 | 88023619 |

|      |          |          |
|------|----------|----------|
| chr1 | 88063439 | 88063701 |
| chr1 | 88203159 | 88203880 |
| chr1 | 88257746 | 88257995 |
| chr1 | 88384441 | 88384655 |
| chr1 | 88423367 | 88426061 |
| chr1 | 88501862 | 88502199 |
| chr1 | 88502414 | 88502747 |
| chr1 | 88702699 | 88702830 |
| chr1 | 88814482 | 88814656 |
| chr1 | 88922252 | 88922494 |
| chr1 | 89110551 | 89111013 |
| chr1 | 89123960 | 89124624 |
| chr1 | 89132349 | 89133023 |
| chr1 | 89223628 | 89224194 |
| chr1 | 89266037 | 89266294 |
| chr1 | 89580387 | 89581307 |
| chr1 | 89604948 | 89605447 |
| chr1 | 89610955 | 89611602 |
| chr1 | 89652568 | 89652820 |
| chr1 | 89673429 | 89673832 |
| chr1 | 89681129 | 89681435 |
| chr1 | 89750236 | 89750785 |
| chr1 | 89760950 | 89761110 |
| chr1 | 89796875 | 89797268 |
| chr1 | 89804591 | 89805198 |
| chr1 | 89839012 | 89839736 |
| chr1 | 91351309 | 91353772 |
| chr1 | 91371278 | 91372148 |
| chr1 | 91402849 | 91403542 |
| chr1 | 91476493 | 91477405 |
| chr1 | 91539522 | 91539755 |
| chr1 | 91548745 | 91548997 |
| chr1 | 91827404 | 91827811 |
| chr1 | 91856711 | 91856843 |
| chr1 | 92914986 | 92915140 |
| chr1 | 94728402 | 94728597 |
| chr1 | 94755002 | 94755446 |
| chr1 | 95255282 | 95255422 |
| chr1 | 95375561 | 95375969 |
| chr1 | 95629935 | 95630018 |
| chr1 | 95673642 | 95673960 |
| chr1 | 97210360 | 97210641 |
| chr1 | 98513674 | 98513780 |



|      |           |           |
|------|-----------|-----------|
| chr1 | 107586402 | 107586634 |
| chr1 | 107694801 | 107695076 |
| chr1 | 108156860 | 108156944 |
| chr1 | 116540814 | 116540924 |
| chr1 | 118643419 | 118643528 |
| chr1 | 120286174 | 120286313 |
| chr1 | 120409310 | 120409523 |
| chr1 | 120545723 | 120546131 |
| chr1 | 120573889 | 120575379 |
| chr1 | 120580141 | 120581158 |
| chr1 | 121318416 | 121318854 |
| chr1 | 121318928 | 121319113 |
| chr1 | 121983987 | 121984304 |
| chr1 | 125101742 | 125101841 |
| chr1 | 129101744 | 129102117 |
| chr1 | 129112023 | 129112266 |
| chr1 | 129228388 | 129228660 |
| chr1 | 129271607 | 129271969 |
| chr1 | 129670965 | 129671618 |
| chr1 | 129698925 | 129699215 |
| chr1 | 129700710 | 129700972 |
| chr1 | 129828183 | 129828383 |
| chr1 | 129999987 | 130000243 |
| chr1 | 130025284 | 130025579 |
| chr1 | 130052348 | 130052673 |
| chr1 | 130079716 | 130079940 |
| chr1 | 130154337 | 130154606 |
| chr1 | 130173892 | 130174164 |
| chr1 | 133175762 | 133175897 |
| chr1 | 133713061 | 133713525 |
| chr1 | 133743895 | 133744523 |
| chr1 | 133807047 | 133807906 |
| chr1 | 133828481 | 133829436 |
| chr1 | 133830631 | 133832339 |
| chr1 | 133904402 | 133904967 |
| chr1 | 134087787 | 134088653 |
| chr1 | 134348206 | 134348371 |
| chr1 | 134373955 | 134374266 |
| chr1 | 134912369 | 134912507 |
| chr1 | 134930532 | 134930659 |
| chr1 | 135027785 | 135028791 |
| chr1 | 136302346 | 136303135 |
| chr1 | 136304154 | 136305236 |

|      |           |           |
|------|-----------|-----------|
| chr1 | 136307215 | 136308217 |
| chr1 | 136377629 | 136377859 |
| chr1 | 136456809 | 136458009 |
| chr1 | 136458020 | 136458511 |
| chr1 | 136522647 | 136522769 |
| chr1 | 136543505 | 136544111 |
| chr1 | 136605750 | 136606043 |
| chr1 | 137006994 | 137007300 |
| chr1 | 137043378 | 137043670 |
| chr1 | 137043813 | 137044281 |
| chr1 | 137051864 | 137052346 |
| chr1 | 137129459 | 137129845 |
| chr1 | 137648547 | 137648714 |
| chr1 | 137665137 | 137665844 |
| chr1 | 138000841 | 138001213 |
| chr1 | 138063723 | 138064182 |
| chr1 | 138394157 | 138394257 |
| chr1 | 138521554 | 138521958 |
| chr1 | 138595219 | 138595570 |
| chr1 | 138618753 | 138619271 |
| chr1 | 141351371 | 141351514 |
| chr1 | 145586598 | 145586938 |
| chr1 | 145626056 | 145626304 |
| chr1 | 153191625 | 153192305 |
| chr1 | 153418631 | 153418861 |
| chr1 | 153602486 | 153602795 |
| chr1 | 153645064 | 153645314 |
| chr1 | 153666635 | 153666735 |
| chr1 | 153667307 | 153667524 |
| chr1 | 154941321 | 154941842 |
| chr1 | 154956610 | 154956963 |
| chr1 | 155284783 | 155284899 |
| chr1 | 155292382 | 155292489 |
| chr1 | 155747111 | 155747245 |
| chr1 | 157010385 | 157010707 |
| chr1 | 157405361 | 157405808 |
| chr1 | 157419401 | 157419693 |
| chr1 | 157801701 | 157801834 |
| chr1 | 157883001 | 157883450 |
| chr1 | 158488974 | 158489334 |
| chr1 | 158489404 | 158489646 |
| chr1 | 158535093 | 158535446 |
| chr1 | 158555476 | 158555695 |

|      |           |           |
|------|-----------|-----------|
| chr1 | 158571878 | 158572277 |
| chr1 | 161270414 | 161270603 |
| chr1 | 162965299 | 162965764 |
| chr1 | 162965838 | 162968651 |
| chr1 | 163099471 | 163099585 |
| chr1 | 164509272 | 164509393 |
| chr1 | 166179175 | 166179711 |
| chr1 | 166313558 | 166313771 |
| chr1 | 167571770 | 167571880 |
| chr1 | 168095627 | 168096153 |
| chr1 | 168096322 | 168096565 |
| chr1 | 169238948 | 169239156 |
| chr1 | 169279178 | 169279287 |
| chr1 | 172958098 | 172958300 |
| chr1 | 172968740 | 172968875 |
| chr1 | 172975115 | 172975241 |
| chr1 | 172996106 | 172996245 |
| chr1 | 172996760 | 172996877 |
| chr1 | 173003740 | 173003882 |
| chr1 | 173004432 | 173004554 |
| chr1 | 173011354 | 173011497 |
| chr1 | 173012005 | 173012123 |
| chr1 | 173032493 | 173032626 |
| chr1 | 173032881 | 173033012 |
| chr1 | 173033164 | 173033291 |
| chr1 | 173041573 | 173041711 |
| chr1 | 173341580 | 173341974 |
| chr1 | 173393250 | 173393625 |
| chr1 | 173599602 | 173599689 |
| chr1 | 174078411 | 174078602 |
| chr1 | 174109322 | 174109583 |
| chr1 | 174124916 | 174125577 |
| chr1 | 174151801 | 174151961 |
| chr1 | 174436691 | 174437478 |
| chr1 | 175320486 | 175320576 |
| chr1 | 175366367 | 175366721 |
| chr1 | 175376577 | 175376949 |
| chr1 | 177834675 | 177834799 |
| chr1 | 178939988 | 178940084 |
| chr1 | 179917573 | 179917762 |
| chr1 | 180567028 | 180567243 |
| chr1 | 182588112 | 182588314 |
| chr1 | 182867297 | 182867409 |

|       |           |           |
|-------|-----------|-----------|
| chr1  | 183081224 | 183081453 |
| chr1  | 183098766 | 183099032 |
| chr1  | 183958878 | 183958967 |
| chr1  | 184695846 | 184696262 |
| chr1  | 184794974 | 184795532 |
| chr1  | 184815181 | 184816459 |
| chr1  | 187028053 | 187028541 |
| chr1  | 187066783 | 187066967 |
| chr1  | 187087625 | 187087985 |
| chr1  | 187094666 | 187094943 |
| chr1  | 187187161 | 187187643 |
| chr1  | 189067781 | 189067949 |
| chr1  | 189120355 | 189120573 |
| chr1  | 189130751 | 189131273 |
| chr1  | 190765310 | 190765405 |
| chr1  | 191552101 | 191553214 |
| chr1  | 191559819 | 191560311 |
| chr1  | 191570303 | 191570644 |
| chr1  | 191601584 | 191601992 |
| chr1  | 193432469 | 193432592 |
| chr1  | 193602787 | 193603552 |
| chr1  | 193735753 | 193736039 |
| chr1  | 194484344 | 194484436 |
| chr1  | 194571761 | 194571936 |
| chr10 | 4541099   | 4541538   |
| chr10 | 4546489   | 4546792   |
| chr10 | 5936673   | 5937017   |
| chr10 | 5972749   | 5972921   |
| chr10 | 6097575   | 6097989   |
| chr10 | 6605921   | 6606011   |
| chr10 | 7309939   | 7310412   |
| chr10 | 7522100   | 7522294   |
| chr10 | 7538616   | 7538827   |
| chr10 | 7676433   | 7676641   |
| chr10 | 9820755   | 9820944   |
| chr10 | 11001032  | 11001282  |
| chr10 | 12083206  | 12083389  |
| chr10 | 12728590  | 12728870  |
| chr10 | 16489023  | 16489116  |
| chr10 | 17775472  | 17776216  |
| chr10 | 17789709  | 17790022  |
| chr10 | 17796094  | 17796277  |
| chr10 | 17810369  | 17810738  |

|       |          |          |
|-------|----------|----------|
| chr10 | 18038318 | 18038823 |
| chr10 | 18049311 | 18049805 |
| chr10 | 18281287 | 18281542 |
| chr10 | 18289872 | 18290281 |
| chr10 | 18298959 | 18299483 |
| chr10 | 18310751 | 18312281 |
| chr10 | 18343226 | 18343378 |
| chr10 | 18564836 | 18565190 |
| chr10 | 19502658 | 19502791 |
| chr10 | 19588766 | 19588857 |
| chr10 | 19654291 | 19654577 |
| chr10 | 19681878 | 19682066 |
| chr10 | 19834573 | 19834827 |
| chr10 | 19868790 | 19869681 |
| chr10 | 19900769 | 19901152 |
| chr10 | 19928284 | 19928367 |
| chr10 | 20032306 | 20033196 |
| chr10 | 20043270 | 20043761 |
| chr10 | 20071588 | 20071798 |
| chr10 | 20766008 | 20766218 |
| chr10 | 21050890 | 21051546 |
| chr10 | 21716777 | 21717366 |
| chr10 | 21718451 | 21719397 |
| chr10 | 22465341 | 22465592 |
| chr10 | 23531477 | 23531564 |
| chr10 | 23884845 | 23884985 |
| chr10 | 24315322 | 24315635 |
| chr10 | 24316231 | 24316444 |
| chr10 | 24591146 | 24591500 |
| chr10 | 24608844 | 24609182 |
| chr10 | 24613825 | 24613926 |
| chr10 | 25079678 | 25080475 |
| chr10 | 25091433 | 25091551 |
| chr10 | 25106406 | 25107032 |
| chr10 | 25210751 | 25211207 |
| chr10 | 25219396 | 25219845 |
| chr10 | 25222257 | 25222750 |
| chr10 | 25242809 | 25243161 |
| chr10 | 27672182 | 27672299 |
| chr10 | 27794670 | 27795383 |
| chr10 | 27821971 | 27822225 |
| chr10 | 27851735 | 27852182 |
| chr10 | 27867832 | 27868169 |

|       |          |          |
|-------|----------|----------|
| chr10 | 28113327 | 28113571 |
| chr10 | 28224753 | 28224963 |
| chr10 | 30213764 | 30213882 |
| chr10 | 30530935 | 30531073 |
| chr10 | 39152188 | 39152279 |
| chr10 | 39185244 | 39185679 |
| chr10 | 39191783 | 39192466 |
| chr10 | 39283806 | 39284004 |
| chr10 | 39346769 | 39346904 |
| chr10 | 39451948 | 39452396 |
| chr10 | 39452433 | 39452826 |
| chr10 | 39471722 | 39472052 |
| chr10 | 39544026 | 39544676 |
| chr10 | 39978270 | 39978593 |
| chr10 | 40069393 | 40070231 |
| chr10 | 40116633 | 40116736 |
| chr10 | 40145527 | 40145929 |
| chr10 | 40178908 | 40179173 |
| chr10 | 40271049 | 40271144 |
| chr10 | 40604135 | 40604489 |
| chr10 | 41233026 | 41233281 |
| chr10 | 41248515 | 41249432 |
| chr10 | 41249445 | 41250327 |
| chr10 | 41250391 | 41250805 |
| chr10 | 42481355 | 42482341 |
| chr10 | 42969326 | 42969658 |
| chr10 | 43007892 | 43008037 |
| chr10 | 43638897 | 43639152 |
| chr10 | 44899158 | 44899402 |
| chr10 | 45595199 | 45595485 |
| chr10 | 45595524 | 45595758 |
| chr10 | 45661739 | 45661843 |
| chr10 | 50470447 | 50470707 |
| chr10 | 51953432 | 51954114 |
| chr10 | 52137381 | 52138173 |
| chr10 | 53129983 | 53130212 |
| chr10 | 53317021 | 53317444 |
| chr10 | 56108523 | 56108753 |
| chr10 | 57206523 | 57206702 |
| chr10 | 57805719 | 57806227 |
| chr10 | 57856073 | 57856179 |
| chr10 | 57909902 | 57910161 |
| chr10 | 57921261 | 57921459 |

|       |          |          |
|-------|----------|----------|
| chr10 | 57950911 | 57951064 |
| chr10 | 57965238 | 57965731 |
| chr10 | 58009269 | 58009478 |
| chr10 | 58786149 | 58786495 |
| chr10 | 58786881 | 58787070 |
| chr10 | 58834127 | 58834723 |
| chr10 | 59181881 | 59181988 |
| chr10 | 59503800 | 59504039 |
| chr10 | 59508544 | 59508832 |
| chr10 | 59533834 | 59533986 |
| chr10 | 59740462 | 59740652 |
| chr10 | 59757280 | 59757662 |
| chr10 | 59764444 | 59765262 |
| chr10 | 60881063 | 60881378 |
| chr10 | 60887650 | 60888051 |
| chr10 | 60980468 | 60980710 |
| chr10 | 61012337 | 61012598 |
| chr10 | 61116649 | 61116865 |
| chr10 | 61143047 | 61143518 |
| chr10 | 61159176 | 61159670 |
| chr10 | 62433924 | 62434218 |
| chr10 | 62706579 | 62707212 |
| chr10 | 62735206 | 62735452 |
| chr10 | 62748002 | 62748321 |
| chr10 | 62763547 | 62763834 |
| chr10 | 62768113 | 62768634 |
| chr10 | 66559104 | 66560368 |
| chr10 | 66569026 | 66570405 |
| chr10 | 66580320 | 66581082 |
| chr10 | 66589337 | 66590372 |
| chr10 | 66682623 | 66683463 |
| chr10 | 68880396 | 68881004 |
| chr10 | 68903964 | 68904266 |
| chr10 | 69559710 | 69560361 |
| chr10 | 69642053 | 69642417 |
| chr10 | 69651815 | 69652232 |
| chr10 | 70810557 | 70810998 |
| chr10 | 70811051 | 70811355 |
| chr10 | 70825086 | 70825416 |
| chr10 | 72136908 | 72137549 |
| chr10 | 74525568 | 74525983 |
| chr10 | 74674877 | 74675297 |
| chr10 | 75398631 | 75398829 |

|       |          |          |
|-------|----------|----------|
| chr10 | 75398975 | 75399339 |
| chr10 | 75399984 | 75400589 |
| chr10 | 75495399 | 75495615 |
| chr10 | 75905639 | 75905840 |
| chr10 | 75938362 | 75938526 |
| chr10 | 75944042 | 75944828 |
| chr10 | 76732083 | 76732225 |
| chr10 | 77060912 | 77061409 |
| chr10 | 77531090 | 77532493 |
| chr10 | 77541766 | 77542188 |
| chr10 | 77776965 | 77777065 |
| chr10 | 79144915 | 79145239 |
| chr10 | 79171213 | 79172161 |
| chr10 | 79174172 | 79174539 |
| chr10 | 79317386 | 79318367 |
| chr10 | 79371937 | 79372071 |
| chr10 | 79425905 | 79426201 |
| chr10 | 79448249 | 79448389 |
| chr10 | 79516368 | 79516956 |
| chr10 | 79517019 | 79517274 |
| chr10 | 79518455 | 79519043 |
| chr10 | 79578552 | 79579141 |
| chr10 | 79580179 | 79580502 |
| chr10 | 79605086 | 79605881 |
| chr10 | 79633462 | 79634274 |
| chr10 | 79634413 | 79635274 |
| chr10 | 79689494 | 79689859 |
| chr10 | 79711898 | 79712019 |
| chr10 | 79740908 | 79741668 |
| chr10 | 79741782 | 79742822 |
| chr10 | 79750240 | 79750677 |
| chr10 | 79755207 | 79755753 |
| chr10 | 79756180 | 79756605 |
| chr10 | 80069899 | 80070733 |
| chr10 | 80085829 | 80086545 |
| chr10 | 80254033 | 80254513 |
| chr10 | 80255008 | 80255680 |
| chr10 | 80266664 | 80267661 |
| chr10 | 80291553 | 80291686 |
| chr10 | 80392895 | 80393055 |
| chr10 | 80568692 | 80568958 |
| chr10 | 80584703 | 80585098 |
| chr10 | 80600527 | 80601619 |



|       |          |          |
|-------|----------|----------|
| chr10 | 80611267 | 80612041 |
| chr10 | 80612350 | 80613058 |
| chr10 | 80639389 | 80640987 |
| chr10 | 80641101 | 80645454 |
| chr10 | 80779678 | 80780079 |
| chr10 | 80827224 | 80827446 |
| chr10 | 80850664 | 80851035 |
| chr10 | 81022237 | 81022798 |
| chr10 | 81022839 | 81023348 |
| chr10 | 81028124 | 81028915 |
| chr10 | 81070874 | 81071098 |
| chr10 | 81121772 | 81121961 |
| chr10 | 81620380 | 81620752 |
| chr10 | 81832674 | 81832834 |
| chr10 | 82323105 | 82324068 |
| chr10 | 82359642 | 82360312 |
| chr10 | 82472049 | 82472330 |
| chr10 | 82658027 | 82658412 |
| chr10 | 82836120 | 82837257 |
| chr10 | 82844841 | 82847277 |
| chr10 | 82855386 | 82855757 |
| chr10 | 82859152 | 82861146 |
| chr10 | 82867666 | 82868855 |
| chr10 | 82876093 | 82878206 |
| chr10 | 82887103 | 82890123 |
| chr10 | 82897198 | 82897796 |
| chr10 | 82912130 | 82912808 |
| chr10 | 82920288 | 82920866 |
| chr10 | 82940572 | 82940971 |
| chr10 | 83025262 | 83025574 |
| chr10 | 83185618 | 83186029 |
| chr10 | 84128580 | 84128948 |
| chr10 | 84174271 | 84174697 |
| chr10 | 84565832 | 84566139 |
| chr10 | 84870129 | 84870572 |
| chr10 | 84929871 | 84930273 |
| chr10 | 84936170 | 84936584 |
| chr10 | 85497987 | 85498222 |
| chr10 | 85763284 | 85763554 |
| chr10 | 86170109 | 86170255 |
| chr10 | 86259171 | 86259553 |
| chr10 | 89208029 | 89208385 |
| chr10 | 89407261 | 89407368 |

|       |           |           |
|-------|-----------|-----------|
| chr10 | 92623529  | 92624421  |
| chr10 | 92624541  | 92624690  |
| chr10 | 92643914  | 92644073  |
| chr10 | 92661400  | 92661605  |
| chr10 | 92691773  | 92691861  |
| chr10 | 92932834  | 92933285  |
| chr10 | 92944301  | 92944463  |
| chr10 | 94051962  | 94052141  |
| chr10 | 94151536  | 94151892  |
| chr10 | 94154898  | 94155280  |
| chr10 | 94157730  | 94157928  |
| chr10 | 94249523  | 94249675  |
| chr10 | 94821102  | 94821199  |
| chr10 | 94977769  | 94978600  |
| chr10 | 94981755  | 94982225  |
| chr10 | 95489677  | 95489912  |
| chr10 | 95592876  | 95592969  |
| chr10 | 96079662  | 96080070  |
| chr10 | 98377327  | 98378110  |
| chr10 | 98378123  | 98378526  |
| chr10 | 98441454  | 98441624  |
| chr10 | 104477328 | 104477524 |
| chr10 | 105280671 | 105280992 |
| chr10 | 107599177 | 107599511 |
| chr10 | 107599570 | 107600165 |
| chr10 | 107616043 | 107616407 |
| chr10 | 107770005 | 107770531 |
| chr10 | 107786718 | 107786906 |
| chr10 | 107800616 | 107800916 |
| chr10 | 107807819 | 107807939 |
| chr10 | 107820823 | 107820955 |
| chr10 | 110910253 | 110910990 |
| chr10 | 110918539 | 110918861 |
| chr10 | 110933385 | 110933695 |
| chr10 | 114428621 | 114428710 |
| chr10 | 114707001 | 114707125 |
| chr10 | 114822043 | 114822351 |
| chr10 | 114822398 | 114823146 |
| chr10 | 114843458 | 114843807 |
| chr10 | 114864790 | 114865122 |
| chr10 | 116018994 | 116019173 |
| chr10 | 118890592 | 118891374 |
| chr10 | 118891478 | 118892624 |

|       |           |           |
|-------|-----------|-----------|
| chr10 | 118913905 | 118914200 |
| chr10 | 118956057 | 118956740 |
| chr10 | 119054973 | 119055128 |
| chr10 | 119135856 | 119135968 |
| chr10 | 119599070 | 119599387 |
| chr10 | 119665445 | 119665809 |
| chr10 | 119667404 | 119667853 |
| chr10 | 119792004 | 119792115 |
| chr10 | 121200276 | 121200378 |
| chr10 | 122115946 | 122116041 |
| chr10 | 122117370 | 122117640 |
| chr10 | 122869624 | 122869717 |
| chr10 | 125403257 | 125403542 |
| chr10 | 126500596 | 126501645 |
| chr10 | 126703430 | 126703867 |
| chr10 | 126718550 | 126718818 |
| chr10 | 126817745 | 126818245 |
| chr10 | 126918703 | 126918874 |
| chr10 | 127456615 | 127456945 |
| chr10 | 127476259 | 127477790 |
| chr10 | 127477827 | 127478634 |
| chr10 | 127496013 | 127496300 |
| chr10 | 127496376 | 127497124 |
| chr10 | 127507357 | 127507550 |
| chr10 | 127513388 | 127513513 |
| chr10 | 127520365 | 127520666 |
| chr10 | 127520940 | 127521324 |
| chr10 | 127522121 | 127522743 |
| chr10 | 127533810 | 127534643 |
| chr10 | 127547863 | 127548310 |
| chr10 | 127552902 | 127553305 |
| chr10 | 127563718 | 127565581 |
| chr10 | 127565672 | 127565962 |
| chr10 | 127669142 | 127669718 |
| chr10 | 127687818 | 127688110 |
| chr10 | 127711130 | 127711526 |
| chr10 | 127774866 | 127775350 |
| chr10 | 127799087 | 127799540 |
| chr10 | 127827849 | 127828385 |
| chr10 | 127831621 | 127832218 |
| chr10 | 127878836 | 127879082 |
| chr10 | 127925002 | 127925559 |
| chr10 | 127927022 | 127927199 |

|       |           |           |
|-------|-----------|-----------|
| chr10 | 128185492 | 128186190 |
| chr10 | 128244128 | 128244501 |
| chr10 | 128268480 | 128268842 |
| chr10 | 128300707 | 128301055 |
| chr11 | 3026950   | 3027727   |
| chr11 | 3059558   | 3060021   |
| chr11 | 3102677   | 3103082   |
| chr11 | 3103245   | 3103464   |
| chr11 | 3131092   | 3131322   |
| chr11 | 3549299   | 3549914   |
| chr11 | 3550262   | 3550514   |
| chr11 | 3583450   | 3584141   |
| chr11 | 3878885   | 3879249   |
| chr11 | 4567377   | 4567622   |
| chr11 | 4634639   | 4635262   |
| chr11 | 4784098   | 4784540   |
| chr11 | 4795379   | 4795876   |
| chr11 | 4892000   | 4892400   |
| chr11 | 5151866   | 5151987   |
| chr11 | 5391005   | 5391199   |
| chr11 | 5689592   | 5690246   |
| chr11 | 6200946   | 6201478   |
| chr11 | 6221165   | 6221649   |
| chr11 | 6231909   | 6232020   |
| chr11 | 6289100   | 6290246   |
| chr11 | 6290419   | 6291935   |
| chr11 | 6303688   | 6303987   |
| chr11 | 6305010   | 6305765   |
| chr11 | 6315892   | 6316833   |
| chr11 | 6463833   | 6464409   |
| chr11 | 6472740   | 6473233   |
| chr11 | 6527916   | 6528272   |
| chr11 | 7769770   | 7769901   |
| chr11 | 9031683   | 9032153   |
| chr11 | 11806820  | 11806930  |
| chr11 | 11807726  | 11808225  |
| chr11 | 12554867  | 12555139  |
| chr11 | 12640234  | 12640374  |
| chr11 | 16490706  | 16490963  |
| chr11 | 16851732  | 16851833  |
| chr11 | 17059503  | 17060189  |
| chr11 | 19824156  | 19826668  |
| chr11 | 19838562  | 19841617  |

|       |          |          |
|-------|----------|----------|
| chr11 | 19847169 | 19848573 |
| chr11 | 19859842 | 19860376 |
| chr11 | 19864880 | 19865577 |
| chr11 | 19882975 | 19883678 |
| chr11 | 19900762 | 19901099 |
| chr11 | 19912506 | 19912942 |
| chr11 | 20058526 | 20058792 |
| chr11 | 20101479 | 20102208 |
| chr11 | 20125531 | 20125944 |
| chr11 | 20443300 | 20444138 |
| chr11 | 20495523 | 20495853 |
| chr11 | 20513222 | 20513622 |
| chr11 | 20532005 | 20532508 |
| chr11 | 20991346 | 20992015 |
| chr11 | 21024561 | 21025002 |
| chr11 | 21042881 | 21043242 |
| chr11 | 21138749 | 21139765 |
| chr11 | 21148217 | 21149240 |
| chr11 | 21171971 | 21172227 |
| chr11 | 22768935 | 22769024 |
| chr11 | 22873162 | 22873401 |
| chr11 | 22902236 | 22902480 |
| chr11 | 23155983 | 23157046 |
| chr11 | 23171404 | 23172273 |
| chr11 | 23206370 | 23207287 |
| chr11 | 23263887 | 23264506 |
| chr11 | 23269496 | 23269863 |
| chr11 | 23622575 | 23622797 |
| chr11 | 29030778 | 29031251 |
| chr11 | 29046816 | 29047064 |
| chr11 | 29073009 | 29073557 |
| chr11 | 29092909 | 29093097 |
| chr11 | 29273652 | 29274291 |
| chr11 | 29432959 | 29433221 |
| chr11 | 29592943 | 29594356 |
| chr11 | 29642051 | 29642707 |
| chr11 | 30283885 | 30284026 |
| chr11 | 30671767 | 30672616 |
| chr11 | 30683114 | 30683707 |
| chr11 | 30729607 | 30729938 |
| chr11 | 30765897 | 30766748 |
| chr11 | 30971722 | 30971917 |
| chr11 | 31318570 | 31318811 |

|       |          |          |
|-------|----------|----------|
| chr11 | 32355345 | 32355806 |
| chr11 | 32542726 | 32543583 |
| chr11 | 32562051 | 32562218 |
| chr11 | 32592558 | 32592864 |
| chr11 | 32593053 | 32593296 |
| chr11 | 33413673 | 33413923 |
| chr11 | 33434763 | 33435347 |
| chr11 | 33449433 | 33450310 |
| chr11 | 33460784 | 33461355 |
| chr11 | 33467613 | 33468310 |
| chr11 | 33468986 | 33471661 |
| chr11 | 33478221 | 33479110 |
| chr11 | 33492523 | 33493743 |
| chr11 | 34712535 | 34712648 |
| chr11 | 34892319 | 34893206 |
| chr11 | 34934543 | 34935046 |
| chr11 | 34935162 | 34935576 |
| chr11 | 35014722 | 35014863 |
| chr11 | 35072704 | 35072926 |
| chr11 | 35094191 | 35094555 |
| chr11 | 35208756 | 35209117 |
| chr11 | 35583430 | 35583893 |
| chr11 | 35589730 | 35590011 |
| chr11 | 36536382 | 36536504 |
| chr11 | 40067044 | 40067381 |
| chr11 | 40327827 | 40327920 |
| chr11 | 40547234 | 40547862 |
| chr11 | 43495501 | 43496084 |
| chr11 | 43522477 | 43522605 |
| chr11 | 44332924 | 44333181 |
| chr11 | 44333246 | 44333830 |
| chr11 | 44352446 | 44352841 |
| chr11 | 45665528 | 45666440 |
| chr11 | 45879144 | 45879522 |
| chr11 | 45926335 | 45926561 |
| chr11 | 45957478 | 45957742 |
| chr11 | 45959911 | 45960666 |
| chr11 | 46250600 | 46250823 |
| chr11 | 48613860 | 48614571 |
| chr11 | 48615059 | 48616224 |
| chr11 | 48616622 | 48617064 |
| chr11 | 48632033 | 48632161 |
| chr11 | 48667152 | 48667258 |

|       |          |          |
|-------|----------|----------|
| chr11 | 48669784 | 48669903 |
| chr11 | 48670129 | 48670255 |
| chr11 | 49017044 | 49017313 |
| chr11 | 49024423 | 49024642 |
| chr11 | 49060739 | 49060832 |
| chr11 | 49526402 | 49526658 |
| chr11 | 49646020 | 49646361 |
| chr11 | 49779217 | 49779407 |
| chr11 | 49977271 | 49977981 |
| chr11 | 49978186 | 49978427 |
| chr11 | 50002287 | 50002647 |
| chr11 | 50038878 | 50039261 |
| chr11 | 50051431 | 50053059 |
| chr11 | 50079937 | 50080997 |
| chr11 | 50084696 | 50085820 |
| chr11 | 50191293 | 50192164 |
| chr11 | 51401841 | 51402120 |
| chr11 | 51863817 | 51864111 |
| chr11 | 51912620 | 51913333 |
| chr11 | 51930475 | 51930638 |
| chr11 | 52045568 | 52046136 |
| chr11 | 52174536 | 52175088 |
| chr11 | 52202037 | 52202623 |
| chr11 | 52498896 | 52499175 |
| chr11 | 53164273 | 53165374 |
| chr11 | 53231018 | 53231245 |
| chr11 | 53351465 | 53351716 |
| chr11 | 53351791 | 53352719 |
| chr11 | 53401930 | 53402557 |
| chr11 | 53913702 | 53915061 |
| chr11 | 53932773 | 53933944 |
| chr11 | 53935794 | 53936831 |
| chr11 | 54251991 | 54252313 |
| chr11 | 54311884 | 54312157 |
| chr11 | 54419921 | 54420273 |
| chr11 | 54467452 | 54467563 |
| chr11 | 54508306 | 54508618 |
| chr11 | 54679955 | 54680361 |
| chr11 | 54723515 | 54723700 |
| chr11 | 54923021 | 54923488 |
| chr11 | 55133255 | 55133345 |
| chr11 | 55283261 | 55284127 |
| chr11 | 55295920 | 55296606 |

|       |          |          |
|-------|----------|----------|
| chr11 | 56936946 | 56937073 |
| chr11 | 57464923 | 57465406 |
| chr11 | 57579501 | 57579587 |
| chr11 | 57615121 | 57615773 |
| chr11 | 57621173 | 57621718 |
| chr11 | 57822371 | 57823646 |
| chr11 | 57846476 | 57846843 |
| chr11 | 57856075 | 57856764 |
| chr11 | 57873463 | 57874813 |
| chr11 | 58121122 | 58122072 |
| chr11 | 58123413 | 58123956 |
| chr11 | 58798130 | 58799331 |
| chr11 | 58800707 | 58801207 |
| chr11 | 59319887 | 59320180 |
| chr11 | 59323416 | 59323510 |
| chr11 | 59553120 | 59553968 |
| chr11 | 59918460 | 59919625 |
| chr11 | 59988979 | 59991049 |
| chr11 | 60230836 | 60231297 |
| chr11 | 60270213 | 60270691 |
| chr11 | 60351375 | 60351984 |
| chr11 | 61827160 | 61827331 |
| chr11 | 62053473 | 62053584 |
| chr11 | 62062496 | 62063018 |
| chr11 | 62080087 | 62080286 |
| chr11 | 62096224 | 62097038 |
| chr11 | 62118243 | 62118697 |
| chr11 | 62134342 | 62134830 |
| chr11 | 62308914 | 62309182 |
| chr11 | 62317211 | 62317437 |
| chr11 | 62365093 | 62365335 |
| chr11 | 62366308 | 62366562 |
| chr11 | 62374009 | 62374116 |
| chr11 | 62374291 | 62374565 |
| chr11 | 62416382 | 62417524 |
| chr11 | 62417926 | 62418354 |
| chr11 | 62590484 | 62590683 |
| chr11 | 62702230 | 62703087 |
| chr11 | 64792576 | 64793118 |
| chr11 | 65439907 | 65440009 |
| chr11 | 67302683 | 67302888 |
| chr11 | 67899712 | 67900099 |
| chr11 | 67924922 | 67925815 |



|       |          |          |
|-------|----------|----------|
| chr11 | 67938428 | 67938880 |
| chr11 | 67960302 | 67960904 |
| chr11 | 68530624 | 68530900 |
| chr11 | 68538518 | 68538788 |
| chr11 | 68553762 | 68554219 |
| chr11 | 68610978 | 68611193 |
| chr11 | 68619913 | 68620012 |
| chr11 | 68715125 | 68715526 |
| chr11 | 68829623 | 68829910 |
| chr11 | 68850496 | 68850620 |
| chr11 | 68853890 | 68854011 |
| chr11 | 68854476 | 68854607 |
| chr11 | 68859195 | 68859845 |
| chr11 | 68886924 | 68887132 |
| chr11 | 68903971 | 68904570 |
| chr11 | 68904825 | 68905711 |
| chr11 | 68923985 | 68924083 |
| chr11 | 68924440 | 68924559 |
| chr11 | 68937737 | 68937875 |
| chr11 | 69182407 | 69182566 |
| chr11 | 69393910 | 69395305 |
| chr11 | 69404784 | 69405291 |
| chr11 | 69446326 | 69447349 |
| chr11 | 69466086 | 69466928 |
| chr11 | 69592929 | 69593322 |
| chr11 | 69715373 | 69715817 |
| chr11 | 69716679 | 69717228 |
| chr11 | 69749220 | 69753684 |
| chr11 | 69778990 | 69779401 |
| chr11 | 69794468 | 69795137 |
| chr11 | 69810352 | 69811166 |
| chr11 | 69820722 | 69820997 |
| chr11 | 69840939 | 69841233 |
| chr11 | 69856332 | 69856531 |
| chr11 | 70340626 | 70340812 |
| chr11 | 70368578 | 70368753 |
| chr11 | 70393815 | 70394361 |
| chr11 | 70419562 | 70420510 |
| chr11 | 70422689 | 70423694 |
| chr11 | 70460824 | 70461505 |
| chr11 | 70515456 | 70516054 |
| chr11 | 70658264 | 70658901 |
| chr11 | 70711656 | 70711902 |

|       |          |          |
|-------|----------|----------|
| chr11 | 70749006 | 70749267 |
| chr11 | 71858372 | 71858947 |
| chr11 | 72420779 | 72422367 |
| chr11 | 72428653 | 72428768 |
| chr11 | 72429155 | 72429266 |
| chr11 | 72480120 | 72480349 |
| chr11 | 72609898 | 72610154 |
| chr11 | 72738489 | 72738814 |
| chr11 | 72774695 | 72775641 |
| chr11 | 72805331 | 72805733 |
| chr11 | 72861288 | 72861768 |
| chr11 | 74133293 | 74133464 |
| chr11 | 74463196 | 74463904 |
| chr11 | 74478582 | 74478846 |
| chr11 | 74600291 | 74600649 |
| chr11 | 74615530 | 74615736 |
| chr11 | 74644209 | 74645092 |
| chr11 | 74649969 | 74650415 |
| chr11 | 74656031 | 74657414 |
| chr11 | 74718853 | 74719109 |
| chr11 | 74739493 | 74739990 |
| chr11 | 74751907 | 74752091 |
| chr11 | 74803774 | 74803883 |
| chr11 | 74814570 | 74815057 |
| chr11 | 74893035 | 74893457 |
| chr11 | 74947400 | 74947727 |
| chr11 | 74976830 | 74977352 |
| chr11 | 75018301 | 75018733 |
| chr11 | 75190465 | 75190571 |
| chr11 | 75201047 | 75201195 |
| chr11 | 75217254 | 75217402 |
| chr11 | 75275916 | 75276302 |
| chr11 | 75276688 | 75276828 |
| chr11 | 75300342 | 75300692 |
| chr11 | 75314286 | 75314799 |
| chr11 | 75386367 | 75386642 |
| chr11 | 75414088 | 75415087 |
| chr11 | 75492813 | 75493485 |
| chr11 | 75546308 | 75547282 |
| chr11 | 75550719 | 75551103 |
| chr11 | 75578178 | 75578588 |
| chr11 | 75578638 | 75579127 |
| chr11 | 76766077 | 76766472 |

|       |          |          |
|-------|----------|----------|
| chr11 | 77280812 | 77281111 |
| chr11 | 77281218 | 77281618 |
| chr11 | 77306796 | 77307864 |
| chr11 | 77319944 | 77321279 |
| chr11 | 77499644 | 77500387 |
| chr11 | 77500435 | 77501526 |
| chr11 | 77599378 | 77600039 |
| chr11 | 77603607 | 77605234 |
| chr11 | 77635068 | 77635802 |
| chr11 | 77672293 | 77672662 |
| chr11 | 77678069 | 77679542 |
| chr11 | 77796247 | 77797328 |
| chr11 | 77797343 | 77798264 |
| chr11 | 77873068 | 77873302 |
| chr11 | 77873651 | 77873970 |
| chr11 | 77908328 | 77908690 |
| chr11 | 77920946 | 77921279 |
| chr11 | 77928490 | 77929500 |
| chr11 | 78062854 | 78063025 |
| chr11 | 78063675 | 78063854 |
| chr11 | 78075260 | 78075978 |
| chr11 | 78086561 | 78087541 |
| chr11 | 78128669 | 78129177 |
| chr11 | 78640230 | 78640775 |
| chr11 | 78644245 | 78644510 |
| chr11 | 78655081 | 78655687 |
| chr11 | 79153091 | 79153988 |
| chr11 | 79176584 | 79176708 |
| chr11 | 79242601 | 79242784 |
| chr11 | 79289826 | 79290089 |
| chr11 | 79291221 | 79292004 |
| chr11 | 79508249 | 79508885 |
| chr11 | 79510329 | 79510759 |
| chr11 | 79518160 | 79518285 |
| chr11 | 79524941 | 79525969 |
| chr11 | 79806579 | 79807564 |
| chr11 | 79845760 | 79847270 |
| chr11 | 79902940 | 79903492 |
| chr11 | 79948000 | 79948444 |
| chr11 | 79968031 | 79968320 |
| chr11 | 79991020 | 79991434 |
| chr11 | 80022836 | 80023096 |
| chr11 | 80079562 | 80079927 |

|       |          |          |
|-------|----------|----------|
| chr11 | 80114492 | 80114735 |
| chr11 | 80196894 | 80197492 |
| chr11 | 80242118 | 80242716 |
| chr11 | 80285454 | 80286553 |
| chr11 | 83084998 | 83085249 |
| chr11 | 83107756 | 83107972 |
| chr11 | 83186274 | 83186556 |
| chr11 | 83216214 | 83216451 |
| chr11 | 83286591 | 83287891 |
| chr11 | 83308957 | 83309527 |
| chr11 | 83318249 | 83318643 |
| chr11 | 83581980 | 83582088 |
| chr11 | 84025536 | 84025716 |
| chr11 | 84071687 | 84071960 |
| chr11 | 84693879 | 84694281 |
| chr11 | 84709538 | 84709757 |
| chr11 | 84720108 | 84720630 |
| chr11 | 85058160 | 85058260 |
| chr11 | 85331946 | 85332099 |
| chr11 | 85364619 | 85364733 |
| chr11 | 85417122 | 85417748 |
| chr11 | 85454096 | 85454482 |
| chr11 | 85519443 | 85519827 |
| chr11 | 85635303 | 85635480 |
| chr11 | 86075676 | 86075775 |
| chr11 | 86923327 | 86923659 |
| chr11 | 86940622 | 86941010 |
| chr11 | 86964512 | 86965087 |
| chr11 | 86970408 | 86970776 |
| chr11 | 86981623 | 86981871 |
| chr11 | 87218530 | 87218836 |
| chr11 | 87236310 | 87236581 |
| chr11 | 87240216 | 87240427 |
| chr11 | 87256602 | 87257007 |
| chr11 | 87261992 | 87262727 |
| chr11 | 87268245 | 87269248 |
| chr11 | 87275686 | 87276102 |
| chr11 | 87284733 | 87285136 |
| chr11 | 87330926 | 87331054 |
| chr11 | 87662992 | 87663086 |
| chr11 | 87861205 | 87862369 |
| chr11 | 88766475 | 88766568 |
| chr11 | 88836967 | 88837278 |

|       |          |          |
|-------|----------|----------|
| chr11 | 88860737 | 88861745 |
| chr11 | 88872167 | 88873355 |
| chr11 | 93746758 | 93748713 |
| chr11 | 93754752 | 93754879 |
| chr11 | 93857404 | 93857560 |
| chr11 | 93860785 | 93860987 |
| chr11 | 94072802 | 94073254 |
| chr11 | 94189350 | 94190198 |
| chr11 | 94491092 | 94491665 |
| chr11 | 94499095 | 94499295 |
| chr11 | 94504501 | 94505314 |
| chr11 | 94781025 | 94781176 |
| chr11 | 94797412 | 94797927 |
| chr11 | 94799834 | 94799958 |
| chr11 | 94803038 | 94803145 |
| chr11 | 94812785 | 94814322 |
| chr11 | 94852234 | 94853029 |
| chr11 | 94866561 | 94866929 |
| chr11 | 94866987 | 94867560 |
| chr11 | 94868017 | 94868260 |
| chr11 | 95186623 | 95186962 |
| chr11 | 95198221 | 95199398 |
| chr11 | 95305451 | 95305736 |
| chr11 | 95508200 | 95508607 |
| chr11 | 95537728 | 95537925 |
| chr11 | 95574305 | 95575133 |
| chr11 | 95624911 | 95625314 |
| chr11 | 95629661 | 95630690 |
| chr11 | 95893991 | 95894254 |
| chr11 | 95901423 | 95901694 |
| chr11 | 96112535 | 96112958 |
| chr11 | 96206889 | 96207009 |
| chr11 | 96650469 | 96650845 |
| chr11 | 96668399 | 96668659 |
| chr11 | 97012724 | 97013118 |
| chr11 | 97224367 | 97224794 |
| chr11 | 97277099 | 97277705 |
| chr11 | 97352846 | 97353056 |
| chr11 | 97361886 | 97362571 |
| chr11 | 97362941 | 97363447 |
| chr11 | 97480904 | 97481226 |
| chr11 | 97524188 | 97526028 |
| chr11 | 97526039 | 97527558 |

|       |           |           |
|-------|-----------|-----------|
| chr11 | 97533888  | 97535410  |
| chr11 | 97539318  | 97540513  |
| chr11 | 97542852  | 97544364  |
| chr11 | 97545745  | 97546684  |
| chr11 | 97568238  | 97568565  |
| chr11 | 97658381  | 97658518  |
| chr11 | 97669894  | 97671203  |
| chr11 | 97686593  | 97687051  |
| chr11 | 97698013  | 97699913  |
| chr11 | 97888308  | 97888811  |
| chr11 | 98064150  | 98064969  |
| chr11 | 98072082  | 98072542  |
| chr11 | 98089447  | 98089611  |
| chr11 | 98219910  | 98220185  |
| chr11 | 98227812  | 98228116  |
| chr11 | 98543904  | 98544124  |
| chr11 | 98556589  | 98557244  |
| chr11 | 98626673  | 98627402  |
| chr11 | 98656422  | 98657794  |
| chr11 | 98698509  | 98698915  |
| chr11 | 98834947  | 98835426  |
| chr11 | 98902529  | 98903170  |
| chr11 | 99122594  | 99122688  |
| chr11 | 99247705  | 99247913  |
| chr11 | 99255604  | 99255689  |
| chr11 | 99717619  | 99717751  |
| chr11 | 100181300 | 100182012 |
| chr11 | 100484207 | 100484403 |
| chr11 | 100932303 | 100932443 |
| chr11 | 100944597 | 100944866 |
| chr11 | 101120615 | 101120822 |
| chr11 | 101177586 | 101177770 |
| chr11 | 101183214 | 101184502 |
| chr11 | 101303718 | 101303943 |
| chr11 | 101466161 | 101466414 |
| chr11 | 101488677 | 101488928 |
| chr11 | 101492130 | 101492854 |
| chr11 | 101503059 | 101503270 |
| chr11 | 101519549 | 101519760 |
| chr11 | 101528458 | 101528930 |
| chr11 | 101609993 | 101610323 |
| chr11 | 102055027 | 102055378 |
| chr11 | 102123425 | 102124090 |

|       |           |           |
|-------|-----------|-----------|
| chr11 | 102149791 | 102150552 |
| chr11 | 102178119 | 102182406 |
| chr11 | 102261094 | 102261286 |
| chr11 | 102429268 | 102429462 |
| chr11 | 102911974 | 102912352 |
| chr11 | 104092813 | 104093270 |
| chr11 | 104172837 | 104173389 |
| chr11 | 104180171 | 104180823 |
| chr11 | 104181198 | 104181691 |
| chr11 | 104187775 | 104187997 |
| chr11 | 104190538 | 104190802 |
| chr11 | 104864677 | 104864799 |
| chr11 | 104988084 | 104988501 |
| chr11 | 105027566 | 105027931 |
| chr11 | 105042833 | 105043435 |
| chr11 | 105043437 | 105043764 |
| chr11 | 105123803 | 105123989 |
| chr11 | 105529026 | 105529130 |
| chr11 | 105585572 | 105585700 |
| chr11 | 105918559 | 105918914 |
| chr11 | 105927939 | 105928240 |
| chr11 | 105946376 | 105946754 |
| chr11 | 106078271 | 106078648 |
| chr11 | 106362228 | 106362883 |
| chr11 | 106586570 | 106586691 |
| chr11 | 106874177 | 106874306 |
| chr11 | 106993099 | 106993221 |
| chr11 | 107419458 | 107419696 |
| chr11 | 107531349 | 107531889 |
| chr11 | 107532379 | 107532718 |
| chr11 | 108357903 | 108358033 |
| chr11 | 109224154 | 109224504 |
| chr11 | 109340278 | 109340391 |
| chr11 | 109340912 | 109341452 |
| chr11 | 109356571 | 109356843 |
| chr11 | 109469800 | 109469887 |
| chr11 | 109512282 | 109513115 |
| chr11 | 109528898 | 109529122 |
| chr11 | 110278604 | 110278898 |
| chr11 | 110321017 | 110321240 |
| chr11 | 114529892 | 114530531 |
| chr11 | 114565686 | 114566194 |
| chr11 | 115024707 | 115024919 |

|       |           |           |
|-------|-----------|-----------|
| chr11 | 115245981 | 115246377 |
| chr11 | 115255959 | 115256648 |
| chr11 | 115274312 | 115274420 |
| chr11 | 115275091 | 115275219 |
| chr11 | 115281763 | 115282377 |
| chr11 | 115439007 | 115439953 |
| chr11 | 115442259 | 115443229 |
| chr11 | 115502039 | 115502133 |
| chr11 | 115652903 | 115653272 |
| chr11 | 115659895 | 115660282 |
| chr11 | 115676019 | 115676354 |
| chr11 | 115676420 | 115676789 |
| chr11 | 115685366 | 115685662 |
| chr11 | 115726236 | 115726546 |
| chr11 | 115749820 | 115749993 |
| chr11 | 115891695 | 115892128 |
| chr11 | 116295728 | 116296409 |
| chr11 | 116533777 | 116534026 |
| chr11 | 116534881 | 116536256 |
| chr11 | 116555501 | 116556359 |
| chr11 | 116780566 | 116780879 |
| chr11 | 116834730 | 116835285 |
| chr11 | 116938543 | 116938932 |
| chr11 | 116982077 | 116983146 |
| chr11 | 117019683 | 117020108 |
| chr11 | 117128689 | 117129081 |
| chr11 | 117193448 | 117194162 |
| chr11 | 117516081 | 117516983 |
| chr11 | 117517077 | 117517567 |
| chr11 | 117593340 | 117593441 |
| chr11 | 117670960 | 117672378 |
| chr11 | 117673713 | 117675561 |
| chr11 | 117848194 | 117848713 |
| chr11 | 117853879 | 117854961 |
| chr11 | 117925728 | 117926567 |
| chr11 | 117926643 | 117929061 |
| chr11 | 117960570 | 117960918 |
| chr11 | 119129398 | 119129597 |
| chr11 | 119310140 | 119310267 |
| chr11 | 119311032 | 119311135 |
| chr11 | 119464711 | 119465166 |
| chr11 | 119468561 | 119469318 |
| chr11 | 119569039 | 119569631 |



|       |           |           |
|-------|-----------|-----------|
| chr11 | 119664906 | 119665231 |
| chr11 | 119684365 | 119684913 |
| chr11 | 119702166 | 119702917 |
| chr11 | 119735512 | 119735868 |
| chr11 | 120466561 | 120466951 |
| chr11 | 120538644 | 120538930 |
| chr11 | 120548316 | 120548922 |
| chr11 | 120569777 | 120570602 |
| chr11 | 120624731 | 120624949 |
| chr11 | 120647193 | 120647419 |
| chr11 | 120818735 | 120819997 |
| chr11 | 121008353 | 121008730 |
| chr11 | 121065846 | 121066261 |
| chr11 | 121082283 | 121082551 |
| chr11 | 121121649 | 121122423 |
| chr11 | 121138532 | 121139135 |
| chr11 | 121291372 | 121291576 |
| chr11 | 121322162 | 121322522 |
| chr11 | 121450435 | 121450536 |
| chr11 | 121454527 | 121454616 |
| chr12 | 3109894   | 3110100   |
| chr12 | 3426922   | 3427793   |
| chr12 | 3438352   | 3438505   |
| chr12 | 3468534   | 3469002   |
| chr12 | 3490117   | 3490433   |
| chr12 | 3758095   | 3758223   |
| chr12 | 3926596   | 3926680   |
| chr12 | 4599868   | 4600409   |
| chr12 | 4653940   | 4654116   |
| chr12 | 4765377   | 4765490   |
| chr12 | 4924265   | 4924876   |
| chr12 | 5649857   | 5650029   |
| chr12 | 6777751   | 6777934   |
| chr12 | 8221574   | 8221845   |
| chr12 | 8681020   | 8681933   |
| chr12 | 8706779   | 8707077   |
| chr12 | 8723094   | 8723237   |
| chr12 | 8723810   | 8724059   |
| chr12 | 8778198   | 8779086   |
| chr12 | 8928864   | 8929143   |
| chr12 | 8934699   | 8934923   |
| chr12 | 8944959   | 8945535   |
| chr12 | 9000654   | 9000891   |

|       |          |          |
|-------|----------|----------|
| chr12 | 9017222  | 9017443  |
| chr12 | 12706868 | 12706979 |
| chr12 | 12877361 | 12877517 |
| chr12 | 12887896 | 12888023 |
| chr12 | 12918796 | 12918976 |
| chr12 | 16817849 | 16818089 |
| chr12 | 16833113 | 16833254 |
| chr12 | 16901647 | 16902546 |
| chr12 | 16932213 | 16932330 |
| chr12 | 16946757 | 16946973 |
| chr12 | 16998637 | 16998758 |
| chr12 | 17273387 | 17273614 |
| chr12 | 17290776 | 17291184 |
| chr12 | 17391337 | 17391943 |
| chr12 | 17552860 | 17553142 |
| chr12 | 17697610 | 17699674 |
| chr12 | 17899962 | 17900133 |
| chr12 | 17910824 | 17911025 |
| chr12 | 17929892 | 17930102 |
| chr12 | 18163014 | 18163186 |
| chr12 | 18394753 | 18394973 |
| chr12 | 19294379 | 19294563 |
| chr12 | 19315497 | 19315773 |
| chr12 | 20202866 | 20203145 |
| chr12 | 20231021 | 20231226 |
| chr12 | 20256423 | 20256563 |
| chr12 | 20318450 | 20318679 |
| chr12 | 22859335 | 22859538 |
| chr12 | 23266536 | 23266703 |
| chr12 | 24809691 | 24809775 |
| chr12 | 25152083 | 25152181 |
| chr12 | 25204526 | 25204630 |
| chr12 | 25393157 | 25393504 |
| chr12 | 25550636 | 25550957 |
| chr12 | 25609425 | 25609566 |
| chr12 | 25730181 | 25730482 |
| chr12 | 29334535 | 29334765 |
| chr12 | 29454810 | 29455115 |
| chr12 | 29470679 | 29470811 |
| chr12 | 29507515 | 29507881 |
| chr12 | 29542055 | 29542828 |
| chr12 | 30623436 | 30623740 |
| chr12 | 31950163 | 31950471 |

|       |          |          |
|-------|----------|----------|
| chr12 | 31972362 | 31972507 |
| chr12 | 31985855 | 31986119 |
| chr12 | 32404169 | 32404428 |
| chr12 | 32521091 | 32521201 |
| chr12 | 33505178 | 33506121 |
| chr12 | 33514415 | 33514746 |
| chr12 | 33639024 | 33639396 |
| chr12 | 37542833 | 37543277 |
| chr12 | 40486055 | 40486368 |
| chr12 | 41172911 | 41173427 |
| chr12 | 41514097 | 41514235 |
| chr12 | 41620290 | 41620384 |
| chr12 | 41853561 | 41853969 |
| chr12 | 41886828 | 41887058 |
| chr12 | 41913222 | 41913646 |
| chr12 | 41933321 | 41933787 |
| chr12 | 41948632 | 41948946 |
| chr12 | 41960833 | 41961190 |
| chr12 | 41968809 | 41968952 |
| chr12 | 41987335 | 41987650 |
| chr12 | 41987837 | 41988346 |
| chr12 | 41995838 | 41995939 |
| chr12 | 42011325 | 42011576 |
| chr12 | 42016302 | 42016582 |
| chr12 | 42074182 | 42075422 |
| chr12 | 42211584 | 42211947 |
| chr12 | 42814828 | 42815079 |
| chr12 | 44844026 | 44844186 |
| chr12 | 52470945 | 52471258 |
| chr12 | 52471533 | 52471892 |
| chr12 | 52521197 | 52521442 |
| chr12 | 53209353 | 53209506 |
| chr12 | 53283133 | 53283303 |
| chr12 | 53604991 | 53605467 |
| chr12 | 53704773 | 53704910 |
| chr12 | 55340230 | 55340376 |
| chr12 | 55433456 | 55433588 |
| chr12 | 55797767 | 55797983 |
| chr12 | 55811293 | 55811501 |
| chr12 | 55815202 | 55815412 |
| chr12 | 55830586 | 55830800 |
| chr12 | 56181596 | 56181810 |
| chr12 | 56950527 | 56950710 |

|       |          |          |
|-------|----------|----------|
| chr12 | 57479416 | 57479525 |
| chr12 | 60129121 | 60129328 |
| chr12 | 60141319 | 60141571 |
| chr12 | 60172875 | 60173253 |
| chr12 | 60235044 | 60235223 |
| chr12 | 60773975 | 60774152 |
| chr12 | 63542744 | 63542827 |
| chr12 | 66066786 | 66067394 |
| chr12 | 66116535 | 66116661 |
| chr12 | 66137400 | 66137873 |
| chr12 | 66200420 | 66200797 |
| chr12 | 66523949 | 66524040 |
| chr12 | 70260279 | 70260630 |
| chr12 | 70298234 | 70299250 |
| chr12 | 70397690 | 70398021 |
| chr12 | 70398269 | 70398567 |
| chr12 | 70400417 | 70400548 |
| chr12 | 70473373 | 70473829 |
| chr12 | 70826007 | 70826332 |
| chr12 | 71031895 | 71032115 |
| chr12 | 71066557 | 71066876 |
| chr12 | 71926514 | 71927279 |
| chr12 | 72047750 | 72047855 |
| chr12 | 72296965 | 72297344 |
| chr12 | 72303546 | 72304237 |
| chr12 | 72329036 | 72329210 |
| chr12 | 72932388 | 72933132 |
| chr12 | 72942395 | 72942513 |
| chr12 | 73052852 | 73053042 |
| chr12 | 73862193 | 73863232 |
| chr12 | 73893203 | 73893514 |
| chr12 | 74095574 | 74095670 |
| chr12 | 74226316 | 74226590 |
| chr12 | 74283918 | 74284186 |
| chr12 | 74306125 | 74306232 |
| chr12 | 75009000 | 75009298 |
| chr12 | 75984898 | 75984982 |
| chr12 | 76772732 | 76773060 |
| chr12 | 77330456 | 77330619 |
| chr12 | 77330700 | 77331862 |
| chr12 | 77356250 | 77357702 |
| chr12 | 77373901 | 77374172 |
| chr12 | 77386042 | 77386691 |

|       |          |          |
|-------|----------|----------|
| chr12 | 77407637 | 77408236 |
| chr12 | 77669778 | 77670252 |
| chr12 | 78674514 | 78675006 |
| chr12 | 79328127 | 79328794 |
| chr12 | 79850004 | 79850596 |
| chr12 | 79978751 | 79978975 |
| chr12 | 80131539 | 80131675 |
| chr12 | 80134226 | 80134534 |
| chr12 | 80428514 | 80429385 |
| chr12 | 80442376 | 80442953 |
| chr12 | 80464207 | 80464773 |
| chr12 | 80524961 | 80525898 |
| chr12 | 80575261 | 80575593 |
| chr12 | 80579224 | 80579997 |
| chr12 | 80601099 | 80601532 |
| chr12 | 80612540 | 80613159 |
| chr12 | 80634521 | 80634839 |
| chr12 | 80659737 | 80660162 |
| chr12 | 80677965 | 80678214 |
| chr12 | 80707169 | 80707850 |
| chr12 | 80735485 | 80736043 |
| chr12 | 80760845 | 80761424 |
| chr12 | 80904829 | 80905105 |
| chr12 | 81537419 | 81537607 |
| chr12 | 81781765 | 81782101 |
| chr12 | 81823385 | 81823665 |
| chr12 | 81891487 | 81892303 |
| chr12 | 81912746 | 81913077 |
| chr12 | 81931453 | 81931816 |
| chr12 | 81951917 | 81952231 |
| chr12 | 81978133 | 81979401 |
| chr12 | 81979482 | 81980130 |
| chr12 | 82012463 | 82012610 |
| chr12 | 82046547 | 82047548 |
| chr12 | 82049108 | 82049521 |
| chr12 | 82120678 | 82121184 |
| chr12 | 82127642 | 82128254 |
| chr12 | 82960918 | 82961765 |
| chr12 | 83095905 | 83096284 |
| chr12 | 83270374 | 83271570 |
| chr12 | 83382184 | 83382291 |
| chr12 | 83384528 | 83384972 |
| chr12 | 83420531 | 83420899 |

|       |           |           |
|-------|-----------|-----------|
| chr12 | 83552265  | 83552408  |
| chr12 | 84973274  | 84974429  |
| chr12 | 84980435  | 84980783  |
| chr12 | 85003532  | 85003972  |
| chr12 | 85009045  | 85009276  |
| chr12 | 85029182  | 85029654  |
| chr12 | 85075481  | 85075993  |
| chr12 | 85481406  | 85481507  |
| chr12 | 85811111  | 85811698  |
| chr12 | 85843923  | 85844056  |
| chr12 | 85855080  | 85855575  |
| chr12 | 86337684  | 86338251  |
| chr12 | 86355812  | 86356485  |
| chr12 | 86391727  | 86392152  |
| chr12 | 87499292  | 87499674  |
| chr12 | 87644335  | 87644530  |
| chr12 | 87811111  | 87813159  |
| chr12 | 87859784  | 87862559  |
| chr12 | 88488240  | 88489196  |
| chr12 | 88496704  | 88497231  |
| chr12 | 91633536  | 91633625  |
| chr12 | 92040095  | 92040194  |
| chr12 | 92828784  | 92829063  |
| chr12 | 96858036  | 96858174  |
| chr12 | 99985288  | 99985664  |
| chr12 | 100001441 | 100001554 |
| chr12 | 100015172 | 100015412 |
| chr12 | 101189666 | 101189820 |
| chr12 | 101437751 | 101437959 |
| chr12 | 101438053 | 101438360 |
| chr12 | 102019272 | 102019602 |
| chr12 | 102106825 | 102107267 |
| chr12 | 103214202 | 103214503 |
| chr12 | 103996188 | 103996582 |
| chr12 | 104013984 | 104014530 |
| chr12 | 106578001 | 106578311 |
| chr12 | 107022954 | 107024385 |
| chr12 | 107025816 | 107026309 |
| chr12 | 107042603 | 107043031 |
| chr12 | 107049229 | 107049455 |
| chr12 | 107248475 | 107248939 |
| chr12 | 107254990 | 107255129 |
| chr12 | 109418024 | 109418372 |

|       |           |           |
|-------|-----------|-----------|
| chr12 | 109440215 | 109441091 |
| chr12 | 110031237 | 110032953 |
| chr12 | 110044685 | 110044931 |
| chr12 | 110050869 | 110051244 |
| chr12 | 110052810 | 110053056 |
| chr12 | 110053546 | 110054027 |
| chr12 | 110132520 | 110132961 |
| chr12 | 110174580 | 110175337 |
| chr12 | 110215732 | 110216511 |
| chr12 | 110782461 | 110788539 |
| chr12 | 110804304 | 110805333 |
| chr12 | 110874088 | 110874396 |
| chr12 | 110884038 | 110884568 |
| chr12 | 110887808 | 110887947 |
| chr12 | 110888704 | 110889459 |
| chr12 | 110889616 | 110889753 |
| chr12 | 110892836 | 110893072 |
| chr12 | 110894478 | 110894676 |
| chr12 | 110918154 | 110918355 |
| chr12 | 110919009 | 110919137 |
| chr12 | 110919705 | 110919896 |
| chr12 | 110923171 | 110923281 |
| chr12 | 110925006 | 110925119 |
| chr12 | 110962965 | 110963583 |
| chr12 | 110975003 | 110975301 |
| chr12 | 111727151 | 111728547 |
| chr12 | 111737486 | 111738407 |
| chr12 | 111748454 | 111748878 |
| chr12 | 111750797 | 111751221 |
| chr12 | 111760896 | 111761268 |
| chr12 | 111773970 | 111774661 |
| chr12 | 111779942 | 111781305 |
| chr12 | 111839682 | 111840242 |
| chr12 | 111855965 | 111856441 |
| chr12 | 111891499 | 111891705 |
| chr12 | 111976248 | 111976904 |
| chr12 | 112083565 | 112083664 |
| chr12 | 112127478 | 112127978 |
| chr12 | 112277997 | 112278721 |
| chr12 | 112314947 | 112315446 |
| chr12 | 112427073 | 112427313 |
| chr12 | 112776448 | 112777505 |
| chr12 | 112779140 | 112779333 |

|       |           |           |
|-------|-----------|-----------|
| chr12 | 112793384 | 112793481 |
| chr12 | 112825358 | 112826004 |
| chr12 | 112864594 | 112864848 |
| chr12 | 112916363 | 112916736 |
| chr12 | 112997096 | 112998066 |
| chr12 | 113027670 | 113029243 |
| chr12 | 113029323 | 113030192 |
| chr12 | 113065334 | 113065612 |
| chr12 | 113273970 | 113274145 |
| chr12 | 113350854 | 113351250 |
| chr12 | 113351820 | 113352894 |
| chr12 | 113842340 | 113843048 |
| chr12 | 113851958 | 113852635 |
| chr12 | 113852858 | 113853764 |
| chr12 | 113960627 | 113961105 |
| chr12 | 113983114 | 113984147 |
| chr12 | 114254969 | 114255473 |
| chr12 | 114336437 | 114337343 |
| chr12 | 114365973 | 114366367 |
| chr12 | 114372772 | 114373563 |
| chr12 | 114395287 | 114395782 |
| chr12 | 114396110 | 114396385 |
| chr12 | 114402178 | 114402361 |
| chr12 | 117276110 | 117276218 |
| chr12 | 117411785 | 117411916 |
| chr12 | 117520261 | 117520635 |
| chr12 | 117643832 | 117644259 |
| chr12 | 118772772 | 118772904 |
| chr12 | 118816307 | 118816490 |
| chr13 | 3477750   | 3478061   |
| chr13 | 3537379   | 3537924   |
| chr13 | 6557746   | 6558014   |
| chr13 | 6958748   | 6958983   |
| chr13 | 8755098   | 8755187   |
| chr13 | 9093082   | 9094027   |
| chr13 | 9366506   | 9366679   |
| chr13 | 9367162   | 9367345   |
| chr13 | 9424881   | 9425113   |
| chr13 | 9451207   | 9451400   |
| chr13 | 10861374  | 10861563  |
| chr13 | 12681989  | 12682106  |
| chr13 | 13560539  | 13560876  |
| chr13 | 13574290  | 13574628  |



|       |          |          |
|-------|----------|----------|
| chr13 | 13582304 | 13582471 |
| chr13 | 13602229 | 13603225 |
| chr13 | 13603247 | 13604000 |
| chr13 | 13604093 | 13604395 |
| chr13 | 14046942 | 14047211 |
| chr13 | 14059768 | 14060162 |
| chr13 | 14156659 | 14156867 |
| chr13 | 14172515 | 14172682 |
| chr13 | 15554994 | 15555165 |
| chr13 | 17532622 | 17532760 |
| chr13 | 17787288 | 17787618 |
| chr13 | 18050164 | 18050344 |
| chr13 | 20681721 | 20681891 |
| chr13 | 21253273 | 21253390 |
| chr13 | 21259491 | 21259599 |
| chr13 | 21261888 | 21262217 |
| chr13 | 21264228 | 21264339 |
| chr13 | 21272809 | 21273233 |
| chr13 | 21292066 | 21292228 |
| chr13 | 21314452 | 21314579 |
| chr13 | 21325911 | 21326036 |
| chr13 | 21332806 | 21332938 |
| chr13 | 21334437 | 21334564 |
| chr13 | 21346084 | 21346206 |
| chr13 | 21351634 | 21351762 |
| chr13 | 21356477 | 21356575 |
| chr13 | 21367850 | 21367951 |
| chr13 | 21371560 | 21371690 |
| chr13 | 21414680 | 21414805 |
| chr13 | 21802442 | 21802565 |
| chr13 | 21802856 | 21802978 |
| chr13 | 21809897 | 21810031 |
| chr13 | 21814152 | 21814267 |
| chr13 | 21827044 | 21827284 |
| chr13 | 21845943 | 21846199 |
| chr13 | 21903759 | 21903994 |
| chr13 | 21947917 | 21948017 |
| chr13 | 21998973 | 21999108 |
| chr13 | 21999813 | 21999928 |
| chr13 | 22003172 | 22003306 |
| chr13 | 22006562 | 22006872 |
| chr13 | 22011126 | 22011225 |
| chr13 | 22063662 | 22063783 |

|       |          |          |
|-------|----------|----------|
| chr13 | 22066925 | 22067028 |
| chr13 | 22118415 | 22118534 |
| chr13 | 22121083 | 22121230 |
| chr13 | 22135090 | 22135320 |
| chr13 | 23377261 | 23377390 |
| chr13 | 23377512 | 23377633 |
| chr13 | 23390649 | 23390771 |
| chr13 | 23391987 | 23392117 |
| chr13 | 23399491 | 23399619 |
| chr13 | 23409354 | 23409461 |
| chr13 | 23488949 | 23489055 |
| chr13 | 23518421 | 23518505 |
| chr13 | 23523280 | 23523406 |
| chr13 | 23528202 | 23528341 |
| chr13 | 23542517 | 23542619 |
| chr13 | 23555400 | 23555526 |
| chr13 | 23558979 | 23559077 |
| chr13 | 23591955 | 23592063 |
| chr13 | 23609065 | 23609188 |
| chr13 | 23609555 | 23609676 |
| chr13 | 23610033 | 23610146 |
| chr13 | 23610916 | 23611034 |
| chr13 | 23611480 | 23611595 |
| chr13 | 23613736 | 23613868 |
| chr13 | 23622953 | 23623395 |
| chr13 | 23626063 | 23626292 |
| chr13 | 23636351 | 23636594 |
| chr13 | 23646905 | 23647089 |
| chr13 | 23647222 | 23647722 |
| chr13 | 23663275 | 23663391 |
| chr13 | 23673461 | 23673887 |
| chr13 | 23830675 | 23830902 |
| chr13 | 23830970 | 23831448 |
| chr13 | 23838640 | 23838871 |
| chr13 | 23848856 | 23849209 |
| chr13 | 23855540 | 23856441 |
| chr13 | 24892993 | 24894812 |
| chr13 | 24923745 | 24924269 |
| chr13 | 34070092 | 34070321 |
| chr13 | 34161831 | 34162033 |
| chr13 | 34255332 | 34255552 |
| chr13 | 35754005 | 35754188 |
| chr13 | 35833184 | 35834392 |

|       |          |          |
|-------|----------|----------|
| chr13 | 36239587 | 36239723 |
| chr13 | 36355216 | 36355527 |
| chr13 | 36372002 | 36372542 |
| chr13 | 36391685 | 36391940 |
| chr13 | 37918095 | 37919843 |
| chr13 | 37965571 | 37965862 |
| chr13 | 38303602 | 38304151 |
| chr13 | 38310902 | 38312020 |
| chr13 | 40999873 | 41000878 |
| chr13 | 41027915 | 41028301 |
| chr13 | 41028542 | 41028899 |
| chr13 | 41054010 | 41054156 |
| chr13 | 42226393 | 42226653 |
| chr13 | 44828511 | 44830219 |
| chr13 | 44842848 | 44844011 |
| chr13 | 44880364 | 44880746 |
| chr13 | 44886024 | 44886223 |
| chr13 | 44896480 | 44896841 |
| chr13 | 44928544 | 44929089 |
| chr13 | 44935933 | 44936305 |
| chr13 | 44981657 | 44981894 |
| chr13 | 44997464 | 44998850 |
| chr13 | 45016123 | 45016977 |
| chr13 | 46764843 | 46765596 |
| chr13 | 49532652 | 49532823 |
| chr13 | 49779604 | 49779849 |
| chr13 | 49829121 | 49829432 |
| chr13 | 49835458 | 49835720 |
| chr13 | 49925994 | 49926181 |
| chr13 | 51196467 | 51196974 |
| chr13 | 51740692 | 51741161 |
| chr13 | 51743559 | 51743753 |
| chr13 | 53305221 | 53305313 |
| chr13 | 54167335 | 54167803 |
| chr13 | 54605311 | 54605742 |
| chr13 | 54692265 | 54692485 |
| chr13 | 54723223 | 54723574 |
| chr13 | 54764372 | 54764756 |
| chr13 | 55206840 | 55207010 |
| chr13 | 55313040 | 55313859 |
| chr13 | 55321988 | 55322435 |
| chr13 | 55368074 | 55368180 |
| chr13 | 55405064 | 55405225 |

|       |          |          |
|-------|----------|----------|
| chr13 | 55424661 | 55424746 |
| chr13 | 55552418 | 55552822 |
| chr13 | 55553077 | 55553611 |
| chr13 | 55572618 | 55573323 |
| chr13 | 55573366 | 55573950 |
| chr13 | 55694522 | 55694704 |
| chr13 | 55698398 | 55699091 |
| chr13 | 55736438 | 55736798 |
| chr13 | 55794483 | 55795071 |
| chr13 | 55802983 | 55803379 |
| chr13 | 58503987 | 58504820 |
| chr13 | 58584959 | 58585199 |
| chr13 | 59704982 | 59705351 |
| chr13 | 60714330 | 60715318 |
| chr13 | 60749062 | 60749443 |
| chr13 | 60839038 | 60839380 |
| chr13 | 62125255 | 62125417 |
| chr13 | 62146474 | 62146609 |
| chr13 | 62231417 | 62231574 |
| chr13 | 62892864 | 62893015 |
| chr13 | 63287097 | 63287363 |
| chr13 | 63344142 | 63344577 |
| chr13 | 63380036 | 63380549 |
| chr13 | 63394232 | 63394373 |
| chr13 | 63401480 | 63402073 |
| chr13 | 63517703 | 63517801 |
| chr13 | 63916721 | 63916956 |
| chr13 | 64263834 | 64264122 |
| chr13 | 65259580 | 65259742 |
| chr13 | 65404829 | 65405198 |
| chr13 | 65760911 | 65761020 |
| chr13 | 66074598 | 66074695 |
| chr13 | 66533128 | 66533319 |
| chr13 | 66694932 | 66695063 |
| chr13 | 66738982 | 66739166 |
| chr13 | 67274821 | 67275009 |
| chr13 | 69751211 | 69751408 |
| chr13 | 69763789 | 69763909 |
| chr13 | 73005905 | 73006012 |
| chr13 | 73604687 | 73604957 |
| chr13 | 73757509 | 73757771 |
| chr13 | 73901938 | 73902363 |
| chr13 | 73952257 | 73954073 |

|       |           |           |
|-------|-----------|-----------|
| chr13 | 76237744  | 76237999  |
| chr13 | 77848268  | 77848387  |
| chr13 | 77996883  | 77996975  |
| chr13 | 78015692  | 78016067  |
| chr13 | 79594247  | 79594370  |
| chr13 | 81024903  | 81025288  |
| chr13 | 81858081  | 81858227  |
| chr13 | 84362155  | 84362398  |
| chr13 | 84417364  | 84417536  |
| chr13 | 85266669  | 85266846  |
| chr13 | 90229440  | 90229670  |
| chr13 | 90229752  | 90229919  |
| chr13 | 90238570  | 90238760  |
| chr13 | 91062755  | 91063266  |
| chr13 | 91403441  | 91403529  |
| chr13 | 91601392  | 91601745  |
| chr13 | 93381116  | 93381538  |
| chr13 | 93868923  | 93869045  |
| chr13 | 94074252  | 94074569  |
| chr13 | 95233732  | 95233984  |
| chr13 | 95283078  | 95283307  |
| chr13 | 95335658  | 95336084  |
| chr13 | 95608852  | 95609194  |
| chr13 | 95749901  | 95750053  |
| chr13 | 96100424  | 96100738  |
| chr13 | 97312616  | 97313156  |
| chr13 | 97348632  | 97348845  |
| chr13 | 97841042  | 97842442  |
| chr13 | 97851805  | 97852779  |
| chr13 | 97859656  | 97860130  |
| chr13 | 97883950  | 97884277  |
| chr13 | 98253785  | 98254497  |
| chr13 | 98254585  | 98256460  |
| chr13 | 98268751  | 98272320  |
| chr13 | 98278575  | 98282887  |
| chr13 | 100123176 | 100123475 |
| chr13 | 100150647 | 100150813 |
| chr13 | 101374323 | 101374432 |
| chr13 | 104186281 | 104186413 |
| chr13 | 104432003 | 104432135 |
| chr13 | 104969061 | 104969320 |
| chr13 | 107817988 | 107818277 |
| chr13 | 107911779 | 107911886 |

|       |           |           |
|-------|-----------|-----------|
| chr13 | 109119023 | 109119404 |
| chr13 | 109461309 | 109461627 |
| chr13 | 110572469 | 110572606 |
| chr13 | 112376938 | 112377260 |
| chr13 | 112381025 | 112381296 |
| chr13 | 112394075 | 112394246 |
| chr13 | 112476533 | 112477604 |
| chr13 | 113254586 | 113254851 |
| chr13 | 113466108 | 113466431 |
| chr13 | 113591135 | 113592059 |
| chr13 | 113606940 | 113607147 |
| chr13 | 113632723 | 113633230 |
| chr13 | 113847485 | 113847648 |
| chr13 | 114083463 | 114083711 |
| chr13 | 114584320 | 114586117 |
| chr13 | 114591473 | 114592478 |
| chr13 | 114605988 | 114607058 |
| chr13 | 114635243 | 114636251 |
| chr13 | 114640643 | 114641239 |
| chr13 | 114678937 | 114679901 |
| chr13 | 114764087 | 114764367 |
| chr13 | 114859049 | 114860258 |
| chr13 | 114898954 | 114899698 |
| chr13 | 120218115 | 120218469 |
| chr13 | 120260063 | 120260327 |
| chr14 | 3049635   | 3049821   |
| chr14 | 4213799   | 4214026   |
| chr14 | 4214433   | 4214611   |
| chr14 | 8650503   | 8651674   |
| chr14 | 8658333   | 8659386   |
| chr14 | 8700088   | 8700399   |
| chr14 | 8705867   | 8706252   |
| chr14 | 8718417   | 8718643   |
| chr14 | 8726674   | 8726880   |
| chr14 | 8736897   | 8737401   |
| chr14 | 8738005   | 8738545   |
| chr14 | 8745450   | 8745740   |
| chr14 | 8755143   | 8756260   |
| chr14 | 8765165   | 8765612   |
| chr14 | 8774561   | 8774887   |
| chr14 | 8782831   | 8783578   |
| chr14 | 8783669   | 8784098   |
| chr14 | 12386049  | 12386713  |

|       |          |          |
|-------|----------|----------|
| chr14 | 12386834 | 12387214 |
| chr14 | 12387249 | 12388266 |
| chr14 | 12572630 | 12572826 |
| chr14 | 12972482 | 12972625 |
| chr14 | 13061612 | 13061841 |
| chr14 | 13128997 | 13129172 |
| chr14 | 15535515 | 15535905 |
| chr14 | 15542586 | 15542768 |
| chr14 | 15549521 | 15549634 |
| chr14 | 15561276 | 15561481 |
| chr14 | 17197753 | 17198159 |
| chr14 | 20570430 | 20570799 |
| chr14 | 20571313 | 20571777 |
| chr14 | 20578919 | 20579124 |
| chr14 | 20587435 | 20588268 |
| chr14 | 20600340 | 20600630 |
| chr14 | 20604537 | 20604831 |
| chr14 | 20617565 | 20617922 |
| chr14 | 20622747 | 20623571 |
| chr14 | 20630172 | 20630464 |
| chr14 | 20630470 | 20631030 |
| chr14 | 21118742 | 21118867 |
| chr14 | 21175059 | 21175291 |
| chr14 | 21187495 | 21187776 |
| chr14 | 21200150 | 21200289 |
| chr14 | 21532803 | 21533900 |
| chr14 | 21540551 | 21540931 |
| chr14 | 21748645 | 21748792 |
| chr14 | 21749241 | 21749604 |
| chr14 | 22069862 | 22070027 |
| chr14 | 22300705 | 22302872 |
| chr14 | 22308100 | 22309010 |
| chr14 | 22317650 | 22321144 |
| chr14 | 22337270 | 22338379 |
| chr14 | 22383554 | 22384017 |
| chr14 | 22386970 | 22387948 |
| chr14 | 22410570 | 22410690 |
| chr14 | 22443735 | 22444868 |
| chr14 | 22444904 | 22445680 |
| chr14 | 22457918 | 22458187 |
| chr14 | 22465405 | 22466351 |
| chr14 | 22468795 | 22469202 |
| chr14 | 22487600 | 22489138 |

|       |          |          |
|-------|----------|----------|
| chr14 | 22489273 | 22489785 |
| chr14 | 22569804 | 22570044 |
| chr14 | 22631939 | 22632108 |
| chr14 | 22662270 | 22662509 |
| chr14 | 23170282 | 23170497 |
| chr14 | 25312706 | 25313157 |
| chr14 | 26426925 | 26427820 |
| chr14 | 27457586 | 27457975 |
| chr14 | 28149323 | 28149699 |
| chr14 | 28242025 | 28242383 |
| chr14 | 28284841 | 28285060 |
| chr14 | 28436830 | 28437017 |
| chr14 | 28467253 | 28467614 |
| chr14 | 28959005 | 28959187 |
| chr14 | 31292915 | 31293153 |
| chr14 | 31362338 | 31362595 |
| chr14 | 31362712 | 31363407 |
| chr14 | 31386511 | 31386817 |
| chr14 | 31467618 | 31467872 |
| chr14 | 31483393 | 31483635 |
| chr14 | 31638676 | 31639787 |
| chr14 | 31645280 | 31645615 |
| chr14 | 31814932 | 31815316 |
| chr14 | 31832403 | 31832831 |
| chr14 | 31932449 | 31932538 |
| chr14 | 31944246 | 31944802 |
| chr14 | 32015555 | 32015650 |
| chr14 | 32321595 | 32321701 |
| chr14 | 32973284 | 32973570 |
| chr14 | 33041538 | 33042065 |
| chr14 | 33047734 | 33047983 |
| chr14 | 33143120 | 33143346 |
| chr14 | 33155330 | 33156130 |
| chr14 | 33338915 | 33339083 |
| chr14 | 33351881 | 33352116 |
| chr14 | 35123881 | 35124384 |
| chr14 | 35124398 | 35124777 |
| chr14 | 35157463 | 35157772 |
| chr14 | 35202925 | 35203523 |
| chr14 | 35316072 | 35316199 |
| chr14 | 35410995 | 35411215 |
| chr14 | 35487106 | 35488066 |
| chr14 | 35514025 | 35514119 |



|       |          |          |
|-------|----------|----------|
| chr14 | 35930401 | 35930550 |
| chr14 | 41789358 | 41789557 |
| chr14 | 41794804 | 41794909 |
| chr14 | 42060974 | 42061111 |
| chr14 | 45839843 | 45840242 |
| chr14 | 45962029 | 45962281 |
| chr14 | 46432480 | 46432578 |
| chr14 | 47917948 | 47918457 |
| chr14 | 47930163 | 47930884 |
| chr14 | 47939431 | 47939710 |
| chr14 | 47939711 | 47940148 |
| chr14 | 48092254 | 48092912 |
| chr14 | 48269464 | 48269773 |
| chr14 | 48741185 | 48741450 |
| chr14 | 48747844 | 48748161 |
| chr14 | 48798306 | 48798450 |
| chr14 | 48810785 | 48810960 |
| chr14 | 49066205 | 49066374 |
| chr14 | 49791992 | 49792572 |
| chr14 | 50682070 | 50682250 |
| chr14 | 51581311 | 51581406 |
| chr14 | 51683553 | 51683689 |
| chr14 | 51708320 | 51708462 |
| chr14 | 51709156 | 51709306 |
| chr14 | 51710321 | 51710436 |
| chr14 | 52688991 | 52689087 |
| chr14 | 52962468 | 52962577 |
| chr14 | 55059571 | 55059762 |
| chr14 | 55136529 | 55136659 |
| chr14 | 55200012 | 55200139 |
| chr14 | 55261671 | 55261856 |
| chr14 | 55512938 | 55513525 |
| chr14 | 55515766 | 55517762 |
| chr14 | 56163179 | 56163413 |
| chr14 | 57031579 | 57032055 |
| chr14 | 57032119 | 57032543 |
| chr14 | 57072058 | 57072298 |
| chr14 | 57093443 | 57093693 |
| chr14 | 57108522 | 57109069 |
| chr14 | 57110336 | 57110752 |
| chr14 | 57287990 | 57288202 |
| chr14 | 58316637 | 58316815 |
| chr14 | 58445089 | 58445246 |

|       |          |          |
|-------|----------|----------|
| chr14 | 59277517 | 59277617 |
| chr14 | 59839765 | 59839868 |
| chr14 | 60084454 | 60084731 |
| chr14 | 60101163 | 60101376 |
| chr14 | 61410559 | 61410842 |
| chr14 | 61422734 | 61423212 |
| chr14 | 61793750 | 61794077 |
| chr14 | 62162472 | 62162578 |
| chr14 | 62967970 | 62968199 |
| chr14 | 63718371 | 63718490 |
| chr14 | 63752045 | 63752365 |
| chr14 | 63761042 | 63761897 |
| chr14 | 64224974 | 64227934 |
| chr14 | 64246392 | 64246845 |
| chr14 | 65307376 | 65307914 |
| chr14 | 65322240 | 65322655 |
| chr14 | 65331250 | 65331560 |
| chr14 | 65372753 | 65372940 |
| chr14 | 65720356 | 65720537 |
| chr14 | 65977462 | 65977890 |
| chr14 | 66593709 | 66593831 |
| chr14 | 68334216 | 68334566 |
| chr14 | 68743083 | 68743324 |
| chr14 | 69955228 | 69955736 |
| chr14 | 70008996 | 70009270 |
| chr14 | 70093648 | 70093960 |
| chr14 | 70094165 | 70094342 |
| chr14 | 75684259 | 75684503 |
| chr14 | 75739983 | 75740420 |
| chr14 | 76244859 | 76245294 |
| chr14 | 76247580 | 76247939 |
| chr14 | 76552570 | 76552703 |
| chr14 | 76814473 | 76816438 |
| chr14 | 76904325 | 76904728 |
| chr14 | 76919344 | 76920263 |
| chr14 | 77070122 | 77071974 |
| chr14 | 77072152 | 77074493 |
| chr14 | 79325701 | 79326030 |
| chr14 | 79340412 | 79340711 |
| chr14 | 79450602 | 79450907 |
| chr14 | 79881471 | 79882072 |
| chr14 | 96844198 | 96844327 |
| chr14 | 96988046 | 96988223 |

|       |           |           |
|-------|-----------|-----------|
| chr14 | 99516047  | 99516621  |
| chr14 | 99529493  | 99529852  |
| chr14 | 99617314  | 99617410  |
| chr14 | 99697903  | 99698906  |
| chr14 | 99700750  | 99701598  |
| chr14 | 102053436 | 102053898 |
| chr14 | 102057888 | 102057981 |
| chr14 | 104088812 | 104089021 |
| chr14 | 105649255 | 105649350 |
| chr14 | 106505909 | 106506298 |
| chr14 | 106506333 | 106506893 |
| chr14 | 115440193 | 115442044 |
| chr14 | 117328468 | 117328648 |
| chr14 | 118536546 | 118536837 |
| chr14 | 118752606 | 118752695 |
| chr14 | 119586482 | 119586669 |
| chr14 | 120756586 | 120756696 |
| chr14 | 120801544 | 120802005 |
| chr14 | 121310363 | 121311190 |
| chr14 | 121342990 | 121343208 |
| chr14 | 121435134 | 121435629 |
| chr14 | 121525054 | 121525243 |
| chr14 | 122277828 | 122278181 |
| chr14 | 122375053 | 122375250 |
| chr14 | 122506319 | 122506747 |
| chr14 | 122526867 | 122527177 |
| chr14 | 122580981 | 122581353 |
| chr14 | 122583122 | 122583687 |
| chr14 | 122634488 | 122634812 |
| chr14 | 122719382 | 122719618 |
| chr14 | 122864132 | 122864564 |
| chr14 | 122875075 | 122875454 |
| chr14 | 123093585 | 123093737 |
| chr15 | 3994444   | 3994576   |
| chr15 | 5068251   | 5068655   |
| chr15 | 6344174   | 6344412   |
| chr15 | 6686574   | 6686782   |
| chr15 | 6716231   | 6716568   |
| chr15 | 7079567   | 7079945   |
| chr15 | 7098517   | 7098972   |
| chr15 | 7136115   | 7136376   |
| chr15 | 7142999   | 7143593   |
| chr15 | 8059330   | 8059546   |

|       |          |          |
|-------|----------|----------|
| chr15 | 8109043  | 8109513  |
| chr15 | 8114629  | 8114985  |
| chr15 | 8119053  | 8119365  |
| chr15 | 8169981  | 8170135  |
| chr15 | 8178020  | 8178258  |
| chr15 | 8206179  | 8206447  |
| chr15 | 9001054  | 9001750  |
| chr15 | 9070343  | 9070444  |
| chr15 | 12047587 | 12048863 |
| chr15 | 12094580 | 12094705 |
| chr15 | 12134832 | 12135620 |
| chr15 | 12141231 | 12141716 |
| chr15 | 12144614 | 12145159 |
| chr15 | 12157675 | 12158444 |
| chr15 | 12165394 | 12165614 |
| chr15 | 12200219 | 12200719 |
| chr15 | 12251654 | 12252199 |
| chr15 | 12763577 | 12764271 |
| chr15 | 21044133 | 21044255 |
| chr15 | 25570825 | 25571462 |
| chr15 | 25685698 | 25686217 |
| chr15 | 25701461 | 25702394 |
| chr15 | 27397297 | 27397547 |
| chr15 | 31539345 | 31539541 |
| chr15 | 33991038 | 33991324 |
| chr15 | 34012461 | 34013282 |
| chr15 | 34072713 | 34073198 |
| chr15 | 34192598 | 34192783 |
| chr15 | 35301339 | 35301564 |
| chr15 | 35711222 | 35711409 |
| chr15 | 36131620 | 36131775 |
| chr15 | 36722880 | 36723137 |
| chr15 | 37291596 | 37292330 |
| chr15 | 39029368 | 39029794 |
| chr15 | 39030096 | 39030450 |
| chr15 | 44264180 | 44264271 |
| chr15 | 44450979 | 44451153 |
| chr15 | 48382852 | 48382947 |
| chr15 | 51709151 | 51709352 |
| chr15 | 52544013 | 52544217 |
| chr15 | 54967648 | 54967824 |
| chr15 | 55013348 | 55013730 |
| chr15 | 55715302 | 55715587 |

|       |          |          |
|-------|----------|----------|
| chr15 | 57766392 | 57766651 |
| chr15 | 57791301 | 57791684 |
| chr15 | 57978168 | 57978378 |
| chr15 | 58765350 | 58765532 |
| chr15 | 59146632 | 59146914 |
| chr15 | 59162288 | 59162564 |
| chr15 | 59213353 | 59213514 |
| chr15 | 59287053 | 59287409 |
| chr15 | 59321457 | 59322085 |
| chr15 | 59363555 | 59363999 |
| chr15 | 61895318 | 61895804 |
| chr15 | 62024054 | 62024403 |
| chr15 | 62031343 | 62031892 |
| chr15 | 62049544 | 62051469 |
| chr15 | 62071508 | 62072131 |
| chr15 | 63857532 | 63857626 |
| chr15 | 64962097 | 64962186 |
| chr15 | 65622592 | 65622759 |
| chr15 | 71624655 | 71624844 |
| chr15 | 72921038 | 72921327 |
| chr15 | 73504395 | 73504598 |
| chr15 | 73581585 | 73582886 |
| chr15 | 74788946 | 74789379 |
| chr15 | 74789608 | 74789773 |
| chr15 | 74917218 | 74917507 |
| chr15 | 75540329 | 75540512 |
| chr15 | 76173951 | 76174988 |
| chr15 | 76233456 | 76234608 |
| chr15 | 76257969 | 76258323 |
| chr15 | 76316106 | 76316357 |
| chr15 | 76370742 | 76371271 |
| chr15 | 76520655 | 76521603 |
| chr15 | 76710465 | 76710669 |
| chr15 | 76734517 | 76735604 |
| chr15 | 76735944 | 76736919 |
| chr15 | 76898220 | 76898357 |
| chr15 | 77839175 | 77839616 |
| chr15 | 77881648 | 77882049 |
| chr15 | 77889151 | 77890069 |
| chr15 | 78267459 | 78268610 |
| chr15 | 78741741 | 78742409 |
| chr15 | 78798367 | 78798938 |
| chr15 | 78835628 | 78835984 |

|       |          |          |
|-------|----------|----------|
| chr15 | 78858951 | 78859114 |
| chr15 | 78963524 | 78963955 |
| chr15 | 78971788 | 78972029 |
| chr15 | 79352104 | 79352384 |
| chr15 | 79536644 | 79537111 |
| chr15 | 79585132 | 79585404 |
| chr15 | 79678482 | 79678878 |
| chr15 | 79722945 | 79723276 |
| chr15 | 79737424 | 79737849 |
| chr15 | 79842782 | 79844083 |
| chr15 | 79844089 | 79845837 |
| chr15 | 79927816 | 79928159 |
| chr15 | 79965017 | 79965676 |
| chr15 | 80080123 | 80081029 |
| chr15 | 80087436 | 80087631 |
| chr15 | 80660637 | 80660972 |
| chr15 | 80720471 | 80720669 |
| chr15 | 80760499 | 80760807 |
| chr15 | 80837306 | 80837843 |
| chr15 | 80840241 | 80840709 |
| chr15 | 80870091 | 80870194 |
| chr15 | 81283729 | 81284005 |
| chr15 | 81415834 | 81417292 |
| chr15 | 81457489 | 81458043 |
| chr15 | 81480885 | 81481380 |
| chr15 | 81498275 | 81498603 |
| chr15 | 81576400 | 81576768 |
| chr15 | 81586035 | 81586615 |
| chr15 | 81624499 | 81624981 |
| chr15 | 81703138 | 81703420 |
| chr15 | 81977676 | 81978861 |
| chr15 | 82000191 | 82000610 |
| chr15 | 82001510 | 82001779 |
| chr15 | 82034168 | 82035913 |
| chr15 | 82980072 | 82980280 |
| chr15 | 84034691 | 84035334 |
| chr15 | 84074400 | 84074753 |
| chr15 | 84129514 | 84130236 |
| chr15 | 84131880 | 84132417 |
| chr15 | 84144227 | 84145434 |
| chr15 | 84145542 | 84146080 |
| chr15 | 84164247 | 84164475 |
| chr15 | 84173092 | 84173355 |

|       |          |          |
|-------|----------|----------|
| chr15 | 85036520 | 85036861 |
| chr15 | 85166719 | 85167474 |
| chr15 | 85228908 | 85229409 |
| chr15 | 85269427 | 85270004 |
| chr15 | 85501550 | 85501847 |
| chr15 | 85577910 | 85578044 |
| chr15 | 85692882 | 85693566 |
| chr15 | 85705877 | 85706845 |
| chr15 | 86232431 | 86232660 |
| chr15 | 88582482 | 88582829 |
| chr15 | 88592112 | 88592223 |
| chr15 | 88606088 | 88606474 |
| chr15 | 88665728 | 88665871 |
| chr15 | 88692869 | 88695489 |
| chr15 | 88695496 | 88696118 |
| chr15 | 88849649 | 88849852 |
| chr15 | 89186202 | 89186638 |
| chr15 | 90054740 | 90055028 |
| chr15 | 92190720 | 92191203 |
| chr15 | 93064791 | 93065071 |
| chr15 | 94503974 | 94504172 |
| chr15 | 95650204 | 95650376 |
| chr15 | 95725386 | 95725882 |
| chr15 | 96117409 | 96117711 |
| chr15 | 96117860 | 96118390 |
| chr15 | 96133810 | 96134144 |
| chr15 | 96143900 | 96144059 |
| chr15 | 96212815 | 96213158 |
| chr15 | 96473093 | 96473491 |
| chr15 | 97214154 | 97214652 |
| chr15 | 97621567 | 97622136 |
| chr15 | 97826319 | 97826629 |
| chr15 | 97946552 | 97946804 |
| chr15 | 98087261 | 98087515 |
| chr15 | 98464916 | 98465740 |
| chr15 | 98638652 | 98638896 |
| chr15 | 98913180 | 98913546 |
| chr15 | 98957029 | 98957571 |
| chr15 | 99017591 | 99017858 |
| chr15 | 99125758 | 99125996 |
| chr15 | 99127018 | 99127606 |
| chr15 | 99140198 | 99140479 |
| chr15 | 99223726 | 99223987 |

|       |           |           |
|-------|-----------|-----------|
| chr15 | 99238803  | 99240275  |
| chr15 | 99803285  | 99803707  |
| chr15 | 99845112  | 99846088  |
| chr15 | 99869135  | 99869614  |
| chr15 | 99896276  | 99896548  |
| chr15 | 99904035  | 99904231  |
| chr15 | 100010161 | 100010397 |
| chr15 | 100067581 | 100068188 |
| chr15 | 100632240 | 100632599 |
| chr15 | 100633152 | 100633362 |
| chr15 | 100644292 | 100644576 |
| chr15 | 100774832 | 100775172 |
| chr15 | 101004501 | 101005676 |
| chr15 | 101055206 | 101055367 |
| chr15 | 101141831 | 101141923 |
| chr15 | 101904300 | 101905026 |
| chr15 | 101907249 | 101907463 |
| chr15 | 101918986 | 101919609 |
| chr15 | 101926141 | 101926904 |
| chr15 | 102126744 | 102127305 |
| chr15 | 102128433 | 102129451 |
| chr15 | 102145759 | 102146182 |
| chr15 | 102221728 | 102221869 |
| chr15 | 102238638 | 102239204 |
| chr15 | 102290778 | 102291498 |
| chr15 | 102300649 | 102301993 |
| chr15 | 102306353 | 102306656 |
| chr15 | 102316311 | 102316946 |
| chr15 | 102324103 | 102324429 |
| chr15 | 102351008 | 102351504 |
| chr15 | 102973104 | 102973336 |
| chr15 | 103129524 | 103130216 |
| chr16 | 3539906   | 3540115   |
| chr16 | 3730410   | 3731091   |
| chr16 | 3732129   | 3732250   |
| chr16 | 3771591   | 3772239   |
| chr16 | 3934746   | 3935261   |
| chr16 | 4595719   | 4596113   |
| chr16 | 4613498   | 4614064   |
| chr16 | 4914715   | 4915135   |
| chr16 | 8478673   | 8478937   |
| chr16 | 8481667   | 8482120   |
| chr16 | 8517081   | 8517222   |



|       |          |          |
|-------|----------|----------|
| chr16 | 8642919  | 8643495  |
| chr16 | 8830244  | 8830660  |
| chr16 | 8830694  | 8831293  |
| chr16 | 8847262  | 8847815  |
| chr16 | 9356553  | 9356796  |
| chr16 | 10170348 | 10170529 |
| chr16 | 10228701 | 10228936 |
| chr16 | 10413795 | 10414168 |
| chr16 | 10832732 | 10832826 |
| chr16 | 10835170 | 10835440 |
| chr16 | 11323218 | 11323324 |
| chr16 | 11369312 | 11369896 |
| chr16 | 11415922 | 11416120 |
| chr16 | 13287928 | 13288049 |
| chr16 | 13300005 | 13300450 |
| chr16 | 13303389 | 13303487 |
| chr16 | 13437411 | 13437626 |
| chr16 | 13553962 | 13554055 |
| chr16 | 13813558 | 13813963 |
| chr16 | 14053800 | 14053949 |
| chr16 | 14361704 | 14362252 |
| chr16 | 15645120 | 15645470 |
| chr16 | 15722658 | 15722859 |
| chr16 | 16870970 | 16871357 |
| chr16 | 16909406 | 16910744 |
| chr16 | 16926171 | 16927166 |
| chr16 | 16983564 | 16984213 |
| chr16 | 17043764 | 17043951 |
| chr16 | 17278043 | 17278722 |
| chr16 | 17632522 | 17632757 |
| chr16 | 17759788 | 17760304 |
| chr16 | 17770338 | 17770699 |
| chr16 | 18066827 | 18067132 |
| chr16 | 18405655 | 18406363 |
| chr16 | 18518317 | 18518463 |
| chr16 | 18836611 | 18836856 |
| chr16 | 18877312 | 18878158 |
| chr16 | 18906914 | 18907229 |
| chr16 | 18912561 | 18912813 |
| chr16 | 20141156 | 20141599 |
| chr16 | 20192214 | 20192797 |
| chr16 | 20207561 | 20207920 |
| chr16 | 20230828 | 20231387 |

|       |          |          |
|-------|----------|----------|
| chr16 | 20517304 | 20517799 |
| chr16 | 20672863 | 20674467 |
| chr16 | 20684263 | 20684629 |
| chr16 | 20692350 | 20692994 |
| chr16 | 20733013 | 20733247 |
| chr16 | 20804979 | 20805072 |
| chr16 | 20888720 | 20888946 |
| chr16 | 21204932 | 21205395 |
| chr16 | 21211044 | 21211717 |
| chr16 | 21216721 | 21217145 |
| chr16 | 21571812 | 21571914 |
| chr16 | 22009554 | 22009835 |
| chr16 | 22010334 | 22010446 |
| chr16 | 22047694 | 22047910 |
| chr16 | 22224347 | 22224448 |
| chr16 | 23050699 | 23050790 |
| chr16 | 23107832 | 23109381 |
| chr16 | 23109971 | 23110797 |
| chr16 | 23110816 | 23112686 |
| chr16 | 24486764 | 24487861 |
| chr16 | 24549256 | 24549381 |
| chr16 | 24682392 | 24682506 |
| chr16 | 24710809 | 24711204 |
| chr16 | 29504713 | 29504799 |
| chr16 | 30600276 | 30600852 |
| chr16 | 30814246 | 30814369 |
| chr16 | 31757533 | 31757910 |
| chr16 | 31798284 | 31798567 |
| chr16 | 32290648 | 32290762 |
| chr16 | 32332314 | 32333182 |
| chr16 | 32410596 | 32410698 |
| chr16 | 32609117 | 32609475 |
| chr16 | 32631021 | 32631497 |
| chr16 | 32631975 | 32632250 |
| chr16 | 32632309 | 32632695 |
| chr16 | 32643989 | 32645498 |
| chr16 | 32667165 | 32667808 |
| chr16 | 32677984 | 32679374 |
| chr16 | 32914212 | 32914447 |
| chr16 | 33002019 | 33002157 |
| chr16 | 33047699 | 33047823 |
| chr16 | 33056546 | 33056930 |
| chr16 | 33341046 | 33341239 |

|       |          |          |
|-------|----------|----------|
| chr16 | 33381012 | 33381698 |
| chr16 | 33394913 | 33395189 |
| chr16 | 33483381 | 33483755 |
| chr16 | 33618531 | 33618746 |
| chr16 | 33829763 | 33830196 |
| chr16 | 33885045 | 33885237 |
| chr16 | 35033242 | 35033808 |
| chr16 | 35587021 | 35587431 |
| chr16 | 35770520 | 35770883 |
| chr16 | 35780872 | 35781106 |
| chr16 | 35802060 | 35802840 |
| chr16 | 35983447 | 35983903 |
| chr16 | 35983993 | 35984242 |
| chr16 | 36075359 | 36076092 |
| chr16 | 36079096 | 36079471 |
| chr16 | 36089036 | 36089973 |
| chr16 | 36875147 | 36875824 |
| chr16 | 36932073 | 36932307 |
| chr16 | 37018610 | 37018770 |
| chr16 | 37083164 | 37083464 |
| chr16 | 37835663 | 37836069 |
| chr16 | 38089286 | 38090237 |
| chr16 | 38158091 | 38158384 |
| chr16 | 38562818 | 38563424 |
| chr16 | 38569437 | 38569854 |
| chr16 | 38572026 | 38572247 |
| chr16 | 38584953 | 38585651 |
| chr16 | 41217858 | 41217994 |
| chr16 | 42876093 | 42876542 |
| chr16 | 42928900 | 42929092 |
| chr16 | 43182616 | 43182710 |
| chr16 | 44139906 | 44140778 |
| chr16 | 44144647 | 44144979 |
| chr16 | 44161374 | 44161709 |
| chr16 | 44174155 | 44174329 |
| chr16 | 47250684 | 47250774 |
| chr16 | 48289869 | 48290601 |
| chr16 | 48440133 | 48440451 |
| chr16 | 48488971 | 48489065 |
| chr16 | 48504017 | 48504233 |
| chr16 | 48516205 | 48516560 |
| chr16 | 48521460 | 48521925 |
| chr16 | 49699314 | 49699612 |

|       |          |          |
|-------|----------|----------|
| chr16 | 50487402 | 50487509 |
| chr16 | 50529033 | 50529537 |
| chr16 | 50540311 | 50540622 |
| chr16 | 52049057 | 52049171 |
| chr16 | 52058541 | 52058678 |
| chr16 | 52190680 | 52190941 |
| chr16 | 55974537 | 55975091 |
| chr16 | 56107219 | 56107336 |
| chr16 | 57121780 | 57122440 |
| chr16 | 57284329 | 57284556 |
| chr16 | 57303948 | 57304371 |
| chr16 | 58728091 | 58728285 |
| chr16 | 62880753 | 62881016 |
| chr16 | 64851834 | 64852497 |
| chr16 | 72663802 | 72664227 |
| chr16 | 72770648 | 72770738 |
| chr16 | 72784169 | 72784256 |
| chr16 | 72824738 | 72825014 |
| chr16 | 78624989 | 78625103 |
| chr16 | 82543472 | 82543613 |
| chr16 | 84774231 | 84775010 |
| chr16 | 84775139 | 84775547 |
| chr16 | 84786535 | 84787023 |
| chr16 | 84811892 | 84812181 |
| chr16 | 84820663 | 84820943 |
| chr16 | 84835578 | 84836126 |
| chr16 | 90220997 | 90221363 |
| chr16 | 90423694 | 90423998 |
| chr16 | 90497440 | 90497676 |
| chr16 | 91496752 | 91497001 |
| chr16 | 91534828 | 91535001 |
| chr16 | 91648242 | 91648785 |
| chr16 | 91655320 | 91656896 |
| chr16 | 91658483 | 91659087 |
| chr16 | 91729634 | 91730555 |
| chr16 | 91740504 | 91741402 |
| chr16 | 91741429 | 91741872 |
| chr16 | 92058566 | 92059500 |
| chr16 | 93686949 | 93687045 |
| chr16 | 93890950 | 93891488 |
| chr16 | 93903378 | 93903700 |
| chr16 | 94592406 | 94593223 |
| chr16 | 94690081 | 94690325 |

|       |          |          |
|-------|----------|----------|
| chr16 | 94791322 | 94792764 |
| chr16 | 94800360 | 94800762 |
| chr16 | 94837362 | 94837687 |
| chr16 | 94848785 | 94849183 |
| chr16 | 94860691 | 94861280 |
| chr16 | 94901575 | 94901875 |
| chr16 | 96303424 | 96303642 |
| chr16 | 96303992 | 96304476 |
| chr16 | 96381128 | 96381480 |
| chr16 | 98236465 | 98236602 |
| chr17 | 3114991  | 3115400  |
| chr17 | 3160816  | 3160985  |
| chr17 | 3188674  | 3188789  |
| chr17 | 3225263  | 3225532  |
| chr17 | 3379807  | 3379901  |
| chr17 | 4995928  | 4996926  |
| chr17 | 5014169  | 5014557  |
| chr17 | 5027861  | 5028124  |
| chr17 | 5136456  | 5136839  |
| chr17 | 5519107  | 5519558  |
| chr17 | 5556129  | 5556335  |
| chr17 | 6107238  | 6107730  |
| chr17 | 7495994  | 7496216  |
| chr17 | 8360458  | 8360565  |
| chr17 | 8371622  | 8372048  |
| chr17 | 8478941  | 8479130  |
| chr17 | 8504181  | 8504427  |
| chr17 | 13112307 | 13112836 |
| chr17 | 13115654 | 13115834 |
| chr17 | 13201127 | 13201313 |
| chr17 | 13897536 | 13898844 |
| chr17 | 13962808 | 13963020 |
| chr17 | 13973042 | 13973146 |
| chr17 | 13999402 | 13999502 |
| chr17 | 14033268 | 14033529 |
| chr17 | 15080254 | 15080613 |
| chr17 | 15098243 | 15098934 |
| chr17 | 15129438 | 15129981 |
| chr17 | 15137396 | 15137576 |
| chr17 | 15146854 | 15147086 |
| chr17 | 15160806 | 15161256 |
| chr17 | 15178219 | 15178472 |
| chr17 | 15191780 | 15192104 |

|       |          |          |
|-------|----------|----------|
| chr17 | 15841979 | 15842328 |
| chr17 | 15845943 | 15846054 |
| chr17 | 17089709 | 17089917 |
| chr17 | 17155187 | 17155422 |
| chr17 | 17165082 | 17165320 |
| chr17 | 17274204 | 17274397 |
| chr17 | 17336889 | 17337116 |
| chr17 | 17378186 | 17378549 |
| chr17 | 17440328 | 17440653 |
| chr17 | 17529110 | 17529328 |
| chr17 | 17535201 | 17535298 |
| chr17 | 17965718 | 17966023 |
| chr17 | 21102456 | 21102687 |
| chr17 | 22564386 | 22564737 |
| chr17 | 23013583 | 23013890 |
| chr17 | 23670919 | 23671043 |
| chr17 | 23677878 | 23678006 |
| chr17 | 23684321 | 23684442 |
| chr17 | 23742507 | 23742971 |
| chr17 | 23818837 | 23819389 |
| chr17 | 23868493 | 23868629 |
| chr17 | 23869419 | 23869982 |
| chr17 | 23940175 | 23941091 |
| chr17 | 23943792 | 23944355 |
| chr17 | 23951974 | 23954869 |
| chr17 | 23954920 | 23958777 |
| chr17 | 23959264 | 23960912 |
| chr17 | 24489316 | 24489597 |
| chr17 | 24551661 | 24552007 |
| chr17 | 24665405 | 24665553 |
| chr17 | 24711360 | 24712764 |
| chr17 | 24806643 | 24807117 |
| chr17 | 24816428 | 24817281 |
| chr17 | 24857056 | 24857572 |
| chr17 | 24857690 | 24857976 |
| chr17 | 25297436 | 25297742 |
| chr17 | 25867909 | 25868231 |
| chr17 | 26012030 | 26012153 |
| chr17 | 26275579 | 26275961 |
| chr17 | 26292981 | 26293123 |
| chr17 | 26305256 | 26305594 |
| chr17 | 26332151 | 26332696 |
| chr17 | 26360446 | 26360646 |

|       |          |          |
|-------|----------|----------|
| chr17 | 26389886 | 26390580 |
| chr17 | 26399729 | 26399874 |
| chr17 | 26406589 | 26406978 |
| chr17 | 26407068 | 26407432 |
| chr17 | 26698510 | 26699235 |
| chr17 | 26700112 | 26701227 |
| chr17 | 26721329 | 26721997 |
| chr17 | 26778980 | 26780317 |
| chr17 | 26781382 | 26782704 |
| chr17 | 26790671 | 26790780 |
| chr17 | 26792510 | 26793364 |
| chr17 | 26968650 | 26968815 |
| chr17 | 27069608 | 27070439 |
| chr17 | 27074211 | 27074828 |
| chr17 | 27078021 | 27078436 |
| chr17 | 27096250 | 27096568 |
| chr17 | 27166165 | 27166869 |
| chr17 | 27194268 | 27194694 |
| chr17 | 27258555 | 27259095 |
| chr17 | 27693568 | 27694908 |
| chr17 | 27985346 | 27985741 |
| chr17 | 27993663 | 27994231 |
| chr17 | 28023297 | 28023777 |
| chr17 | 28046246 | 28047061 |
| chr17 | 28115449 | 28115753 |
| chr17 | 28338730 | 28339064 |
| chr17 | 28465527 | 28467108 |
| chr17 | 28828320 | 28828803 |
| chr17 | 28834282 | 28834475 |
| chr17 | 28906616 | 28907049 |
| chr17 | 28937596 | 28938825 |
| chr17 | 29169622 | 29170153 |
| chr17 | 29170312 | 29171283 |
| chr17 | 29176403 | 29176960 |
| chr17 | 29231062 | 29231831 |
| chr17 | 29423351 | 29423800 |
| chr17 | 29432565 | 29432796 |
| chr17 | 29627650 | 29629031 |
| chr17 | 29687869 | 29688068 |
| chr17 | 29717203 | 29717291 |
| chr17 | 29718160 | 29718576 |
| chr17 | 29733573 | 29734003 |
| chr17 | 29751916 | 29752028 |

|       |          |          |
|-------|----------|----------|
| chr17 | 29797670 | 29798421 |
| chr17 | 29822536 | 29822926 |
| chr17 | 30142024 | 30142470 |
| chr17 | 30192107 | 30192514 |
| chr17 | 30217201 | 30217409 |
| chr17 | 30585905 | 30586094 |
| chr17 | 30773513 | 30773637 |
| chr17 | 31038859 | 31039972 |
| chr17 | 31042662 | 31043452 |
| chr17 | 31075316 | 31075730 |
| chr17 | 31657128 | 31657324 |
| chr17 | 31701835 | 31702583 |
| chr17 | 32174660 | 32175933 |
| chr17 | 32458389 | 32458673 |
| chr17 | 33102934 | 33103229 |
| chr17 | 33133576 | 33133785 |
| chr17 | 33687127 | 33687451 |
| chr17 | 33768036 | 33768388 |
| chr17 | 33954080 | 33955539 |
| chr17 | 33969135 | 33969404 |
| chr17 | 34066529 | 34067028 |
| chr17 | 34067070 | 34067782 |
| chr17 | 34068194 | 34068737 |
| chr17 | 34069319 | 34070069 |
| chr17 | 34081781 | 34082054 |
| chr17 | 34096640 | 34096724 |
| chr17 | 34168816 | 34170130 |
| chr17 | 34256568 | 34256887 |
| chr17 | 34257009 | 34257444 |
| chr17 | 34683999 | 34684287 |
| chr17 | 34719415 | 34719761 |
| chr17 | 34729195 | 34729694 |
| chr17 | 34742825 | 34743644 |
| chr17 | 34749278 | 34750393 |
| chr17 | 34791209 | 34791991 |
| chr17 | 34987403 | 34987697 |
| chr17 | 35031926 | 35032413 |
| chr17 | 35118804 | 35119026 |
| chr17 | 35138020 | 35138812 |
| chr17 | 35237053 | 35237348 |
| chr17 | 35280121 | 35280775 |
| chr17 | 35378746 | 35379381 |
| chr17 | 35379485 | 35380506 |



|       |          |          |
|-------|----------|----------|
| chr17 | 35384033 | 35384422 |
| chr17 | 35385752 | 35388402 |
| chr17 | 35642953 | 35643594 |
| chr17 | 35663687 | 35664009 |
| chr17 | 35978650 | 35978984 |
| chr17 | 35989352 | 35990860 |
| chr17 | 35994889 | 35995791 |
| chr17 | 36053934 | 36054453 |
| chr17 | 36067286 | 36067845 |
| chr17 | 36411729 | 36411998 |
| chr17 | 37139445 | 37141495 |
| chr17 | 37146376 | 37147574 |
| chr17 | 37182806 | 37184036 |
| chr17 | 37185344 | 37185963 |
| chr17 | 37186014 | 37188281 |
| chr17 | 37203918 | 37205056 |
| chr17 | 37209325 | 37210591 |
| chr17 | 37210730 | 37211253 |
| chr17 | 37218642 | 37218995 |
| chr17 | 38134454 | 38134689 |
| chr17 | 38144356 | 38144564 |
| chr17 | 39979934 | 39983356 |
| chr17 | 39985146 | 39985828 |
| chr17 | 45142098 | 45142284 |
| chr17 | 45167939 | 45168204 |
| chr17 | 45408908 | 45408993 |
| chr17 | 45703689 | 45704184 |
| chr17 | 45757618 | 45757734 |
| chr17 | 45823457 | 45823778 |
| chr17 | 46400632 | 46400795 |
| chr17 | 46520930 | 46521352 |
| chr17 | 46541094 | 46541195 |
| chr17 | 46848724 | 46849367 |
| chr17 | 47197548 | 47197651 |
| chr17 | 47303701 | 47304203 |
| chr17 | 47385969 | 47386542 |
| chr17 | 47457118 | 47457349 |
| chr17 | 47730421 | 47730945 |
| chr17 | 47735622 | 47736539 |
| chr17 | 47809440 | 47810042 |
| chr17 | 47874873 | 47875790 |
| chr17 | 47885580 | 47885794 |
| chr17 | 47985777 | 47985952 |

|       |          |          |
|-------|----------|----------|
| chr17 | 53618581 | 53619468 |
| chr17 | 53706939 | 53707037 |
| chr17 | 53761028 | 53761228 |
| chr17 | 55839544 | 55839632 |
| chr17 | 56179875 | 56180102 |
| chr17 | 56235571 | 56236746 |
| chr17 | 56461565 | 56462065 |
| chr17 | 56752821 | 56753613 |
| chr17 | 56839839 | 56840184 |
| chr17 | 56907584 | 56908343 |
| chr17 | 57133073 | 57133374 |
| chr17 | 63849379 | 63849583 |
| chr17 | 64213430 | 64213849 |
| chr17 | 64213851 | 64214034 |
| chr17 | 64229405 | 64229583 |
| chr17 | 64284780 | 64284952 |
| chr17 | 64365343 | 64365810 |
| chr17 | 64389835 | 64389996 |
| chr17 | 64950093 | 64951379 |
| chr17 | 64989266 | 64989423 |
| chr17 | 65053101 | 65053285 |
| chr17 | 65103621 | 65103898 |
| chr17 | 66133070 | 66133458 |
| chr17 | 66435432 | 66435559 |
| chr17 | 66476360 | 66476684 |
| chr17 | 68046644 | 68046997 |
| chr17 | 68103476 | 68103836 |
| chr17 | 68132162 | 68132557 |
| chr17 | 68157095 | 68157542 |
| chr17 | 68171739 | 68171936 |
| chr17 | 71202237 | 71202697 |
| chr17 | 71307384 | 71307506 |
| chr17 | 71574656 | 71574906 |
| chr17 | 71965723 | 71966455 |
| chr17 | 71968051 | 71968369 |
| chr17 | 71980619 | 71980760 |
| chr17 | 71990090 | 71990359 |
| chr17 | 71990660 | 71991496 |
| chr17 | 73267674 | 73267833 |
| chr17 | 73283903 | 73284129 |
| chr17 | 73337152 | 73337268 |
| chr17 | 73567363 | 73567723 |
| chr17 | 73574139 | 73574405 |

|       |          |          |
|-------|----------|----------|
| chr17 | 74738333 | 74738774 |
| chr17 | 74888875 | 74889246 |
| chr17 | 74979609 | 74979942 |
| chr17 | 75016101 | 75016406 |
| chr17 | 75026848 | 75027083 |
| chr17 | 75049158 | 75049551 |
| chr17 | 75058508 | 75058730 |
| chr17 | 75145587 | 75145826 |
| chr17 | 78599749 | 78600349 |
| chr17 | 79060980 | 79061115 |
| chr17 | 79315989 | 79316224 |
| chr17 | 80298449 | 80298591 |
| chr17 | 83750303 | 83750889 |
| chr17 | 83795066 | 83795396 |
| chr17 | 83830304 | 83830606 |
| chr17 | 83868845 | 83869098 |
| chr17 | 84105381 | 84105786 |
| chr17 | 84149539 | 84149743 |
| chr17 | 84261224 | 84261431 |
| chr17 | 84790773 | 84790900 |
| chr17 | 85357345 | 85358297 |
| chr17 | 85365793 | 85366311 |
| chr17 | 85397100 | 85397361 |
| chr17 | 85410201 | 85410555 |
| chr17 | 85592909 | 85593143 |
| chr17 | 86603198 | 86603598 |
| chr17 | 86617527 | 86618308 |
| chr17 | 87153341 | 87153478 |
| chr17 | 88036030 | 88036657 |
| chr17 | 88108715 | 88108879 |
| chr17 | 88245837 | 88245956 |
| chr17 | 88374394 | 88375689 |
| chr17 | 88469728 | 88470236 |
| chr17 | 88602243 | 88602499 |
| chr17 | 88840352 | 88841139 |
| chr17 | 88866587 | 88866817 |
| chr17 | 88906101 | 88906192 |
| chr17 | 89491284 | 89491439 |
| chr17 | 93737194 | 93737562 |
| chr17 | 93752027 | 93752305 |
| chr17 | 95159308 | 95159439 |
| chr18 | 3774663  | 3775014  |
| chr18 | 3789493  | 3789650  |

|       |          |          |
|-------|----------|----------|
| chr18 | 3834148  | 3834510  |
| chr18 | 4389398  | 4389806  |
| chr18 | 4414126  | 4414393  |
| chr18 | 4921311  | 4922372  |
| chr18 | 4960617  | 4960868  |
| chr18 | 4999307  | 4999826  |
| chr18 | 5591874  | 5592991  |
| chr18 | 5593127  | 5593571  |
| chr18 | 5710900  | 5711025  |
| chr18 | 6085368  | 6085502  |
| chr18 | 6490738  | 6490928  |
| chr18 | 6765209  | 6765698  |
| chr18 | 7835173  | 7835307  |
| chr18 | 7868847  | 7869058  |
| chr18 | 7892167  | 7892375  |
| chr18 | 7916018  | 7916184  |
| chr18 | 9965253  | 9965668  |
| chr18 | 9966148  | 9966528  |
| chr18 | 10725559 | 10726453 |
| chr18 | 10814529 | 10814814 |
| chr18 | 11846116 | 11846345 |
| chr18 | 12031215 | 12031471 |
| chr18 | 12306317 | 12306885 |
| chr18 | 12314068 | 12314256 |
| chr18 | 12331833 | 12331946 |
| chr18 | 12759990 | 12760272 |
| chr18 | 12770792 | 12771122 |
| chr18 | 12802225 | 12802739 |
| chr18 | 13027748 | 13028211 |
| chr18 | 13094094 | 13094283 |
| chr18 | 13118245 | 13118475 |
| chr18 | 14881826 | 14881946 |
| chr18 | 20761999 | 20762341 |
| chr18 | 20939273 | 20939527 |
| chr18 | 21102829 | 21102914 |
| chr18 | 24179148 | 24179353 |
| chr18 | 24443211 | 24443331 |
| chr18 | 25215504 | 25215756 |
| chr18 | 25249034 | 25249254 |
| chr18 | 25327589 | 25327754 |
| chr18 | 25384410 | 25384880 |
| chr18 | 25479860 | 25479959 |
| chr18 | 28512682 | 28512846 |

|       |          |          |
|-------|----------|----------|
| chr18 | 31963862 | 31964229 |
| chr18 | 32000162 | 32000607 |
| chr18 | 32053782 | 32054139 |
| chr18 | 32227463 | 32227764 |
| chr18 | 32262926 | 32263434 |
| chr18 | 32402015 | 32402255 |
| chr18 | 32417782 | 32417988 |
| chr18 | 32980359 | 32980481 |
| chr18 | 33954546 | 33955142 |
| chr18 | 34380599 | 34381406 |
| chr18 | 34440529 | 34440686 |
| chr18 | 34936648 | 34937664 |
| chr18 | 34963146 | 34963931 |
| chr18 | 34968378 | 34969160 |
| chr18 | 35278538 | 35279160 |
| chr18 | 35713899 | 35714347 |
| chr18 | 35716587 | 35717037 |
| chr18 | 35720691 | 35723443 |
| chr18 | 35744088 | 35744687 |
| chr18 | 35758288 | 35759108 |
| chr18 | 35767773 | 35768038 |
| chr18 | 35931138 | 35932127 |
| chr18 | 35989605 | 35990619 |
| chr18 | 36123976 | 36124492 |
| chr18 | 36440674 | 36441441 |
| chr18 | 36445831 | 36447122 |
| chr18 | 36479819 | 36480165 |
| chr18 | 36551196 | 36551521 |
| chr18 | 36720193 | 36721141 |
| chr18 | 36758818 | 36758948 |
| chr18 | 36823815 | 36824106 |
| chr18 | 36961517 | 36961710 |
| chr18 | 37972562 | 37973377 |
| chr18 | 38000116 | 38000526 |
| chr18 | 38456435 | 38456732 |
| chr18 | 39273874 | 39274141 |
| chr18 | 39336439 | 39336661 |
| chr18 | 39437634 | 39437943 |
| chr18 | 40952369 | 40952469 |
| chr18 | 41356139 | 41356240 |
| chr18 | 42449085 | 42449202 |
| chr18 | 42671150 | 42672058 |
| chr18 | 42684567 | 42684964 |

|       |          |          |
|-------|----------|----------|
| chr18 | 44540225 | 44540837 |
| chr18 | 45040054 | 45040200 |
| chr18 | 46545753 | 46545954 |
| chr18 | 46901742 | 46902009 |
| chr18 | 47060454 | 47060585 |
| chr18 | 47085000 | 47085174 |
| chr18 | 47143394 | 47143739 |
| chr18 | 47144531 | 47144914 |
| chr18 | 47151766 | 47152272 |
| chr18 | 47161365 | 47162087 |
| chr18 | 47180689 | 47181090 |
| chr18 | 47186137 | 47186404 |
| chr18 | 48206299 | 48206436 |
| chr18 | 49992298 | 49992772 |
| chr18 | 50007576 | 50007719 |
| chr18 | 50016008 | 50016167 |
| chr18 | 50046975 | 50047111 |
| chr18 | 50068921 | 50069054 |
| chr18 | 50139859 | 50140038 |
| chr18 | 50182325 | 50182644 |
| chr18 | 50212923 | 50213401 |
| chr18 | 53336016 | 53336730 |
| chr18 | 53368556 | 53368725 |
| chr18 | 53905723 | 53905824 |
| chr18 | 54021881 | 54022644 |
| chr18 | 56867434 | 56868028 |
| chr18 | 56868149 | 56869009 |
| chr18 | 56912875 | 56913036 |
| chr18 | 57535861 | 57536306 |
| chr18 | 57545145 | 57545505 |
| chr18 | 57550620 | 57551285 |
| chr18 | 58038203 | 58038831 |
| chr18 | 58819369 | 58819635 |
| chr18 | 60332787 | 60332912 |
| chr18 | 60934261 | 60934823 |
| chr18 | 60936631 | 60936951 |
| chr18 | 61714944 | 61715762 |
| chr18 | 61748869 | 61749244 |
| chr18 | 63081996 | 63082221 |
| chr18 | 64088104 | 64088322 |
| chr18 | 65062986 | 65063288 |
| chr18 | 65068730 | 65068979 |
| chr18 | 65085105 | 65085672 |

|       |          |          |
|-------|----------|----------|
| chr18 | 65157900 | 65158274 |
| chr18 | 65172088 | 65172505 |
| chr18 | 65587160 | 65587436 |
| chr18 | 65727464 | 65727628 |
| chr18 | 65827080 | 65827355 |
| chr18 | 66624911 | 66625152 |
| chr18 | 67449160 | 67449711 |
| chr18 | 67450894 | 67451634 |
| chr18 | 67584721 | 67584805 |
| chr18 | 67640466 | 67640695 |
| chr18 | 67875027 | 67875111 |
| chr18 | 67934643 | 67935104 |
| chr18 | 67954145 | 67954562 |
| chr18 | 68000893 | 68001576 |
| chr18 | 68092981 | 68093451 |
| chr18 | 69505763 | 69506043 |
| chr18 | 70117080 | 70117203 |
| chr18 | 70728046 | 70728557 |
| chr18 | 70767492 | 70767785 |
| chr18 | 73732474 | 73732728 |
| chr18 | 73733058 | 73733441 |
| chr18 | 75160190 | 75161295 |
| chr18 | 75161426 | 75161668 |
| chr18 | 75178436 | 75178804 |
| chr18 | 75526891 | 75530915 |
| chr18 | 75550363 | 75552705 |
| chr18 | 76195163 | 76195702 |
| chr18 | 76223941 | 76224074 |
| chr18 | 76231749 | 76232166 |
| chr18 | 76232596 | 76232931 |
| chr18 | 76256584 | 76257034 |
| chr18 | 76425032 | 76425275 |
| chr18 | 76428199 | 76428949 |
| chr18 | 77168831 | 77169090 |
| chr18 | 77277964 | 77279829 |
| chr18 | 77285414 | 77287024 |
| chr18 | 77302830 | 77305477 |
| chr18 | 77313904 | 77314487 |
| chr18 | 77325281 | 77325710 |
| chr18 | 77336035 | 77336505 |
| chr18 | 77380409 | 77380825 |
| chr18 | 77381962 | 77382596 |
| chr18 | 77399039 | 77399141 |

|       |          |          |
|-------|----------|----------|
| chr18 | 78012731 | 78013423 |
| chr18 | 78033037 | 78033612 |
| chr18 | 78730237 | 78730327 |
| chr18 | 80403633 | 80404260 |
| chr18 | 80406301 | 80406597 |
| chr18 | 85110475 | 85110779 |
| chr18 | 85121181 | 85121825 |
| chr18 | 85148121 | 85148520 |
| chr18 | 89170200 | 89170520 |
| chr18 | 89221537 | 89221772 |
| chr18 | 89256025 | 89256377 |
| chr19 | 3205850  | 3206060  |
| chr19 | 3576258  | 3576381  |
| chr19 | 3768889  | 3769225  |
| chr19 | 3851853  | 3852552  |
| chr19 | 3876831  | 3878030  |
| chr19 | 4002767  | 4003487  |
| chr19 | 4153717  | 4154008  |
| chr19 | 4232015  | 4232187  |
| chr19 | 4444042  | 4444400  |
| chr19 | 4482998  | 4483293  |
| chr19 | 4615135  | 4616036  |
| chr19 | 4751945  | 4752073  |
| chr19 | 5367328  | 5367454  |
| chr19 | 5426889  | 5427351  |
| chr19 | 5461635  | 5461898  |
| chr19 | 5493429  | 5494017  |
| chr19 | 5642500  | 5642595  |
| chr19 | 6306633  | 6308530  |
| chr19 | 6318018  | 6318477  |
| chr19 | 6324449  | 6325531  |
| chr19 | 6340115  | 6340326  |
| chr19 | 6353523  | 6353961  |
| chr19 | 6363708  | 6364959  |
| chr19 | 6374720  | 6376780  |
| chr19 | 6516762  | 6516963  |
| chr19 | 7049386  | 7049829  |
| chr19 | 7321196  | 7321302  |
| chr19 | 7342584  | 7343556  |
| chr19 | 7348870  | 7349488  |
| chr19 | 7569255  | 7569469  |
| chr19 | 8798456  | 8800921  |
| chr19 | 8839512  | 8840034  |



|       |          |          |
|-------|----------|----------|
| chr19 | 8840053  | 8841259  |
| chr19 | 8894448  | 8895390  |
| chr19 | 8946008  | 8946331  |
| chr19 | 8967503  | 8967836  |
| chr19 | 8981707  | 8982779  |
| chr19 | 8982884  | 8983506  |
| chr19 | 8990104  | 8991158  |
| chr19 | 9008100  | 9008431  |
| chr19 | 9023313  | 9023713  |
| chr19 | 9041595  | 9041940  |
| chr19 | 9051076  | 9051801  |
| chr19 | 9063781  | 9064104  |
| chr19 | 9076440  | 9077044  |
| chr19 | 9092033  | 9092727  |
| chr19 | 10057129 | 10057578 |
| chr19 | 10059009 | 10059568 |
| chr19 | 10269643 | 10270044 |
| chr19 | 10463621 | 10463741 |
| chr19 | 10480018 | 10480201 |
| chr19 | 10600195 | 10600564 |
| chr19 | 10609717 | 10610053 |
| chr19 | 10680065 | 10680438 |
| chr19 | 10703580 | 10704451 |
| chr19 | 10787258 | 10787739 |
| chr19 | 11769754 | 11769866 |
| chr19 | 12040830 | 12041042 |
| chr19 | 12080523 | 12080650 |
| chr19 | 12086415 | 12086547 |
| chr19 | 12086751 | 12086875 |
| chr19 | 15754511 | 15754625 |
| chr19 | 16207220 | 16208222 |
| chr19 | 16223951 | 16224049 |
| chr19 | 16335734 | 16335848 |
| chr19 | 16392817 | 16393455 |
| chr19 | 16423271 | 16423494 |
| chr19 | 16458129 | 16458450 |
| chr19 | 18663378 | 18663487 |
| chr19 | 18745703 | 18745864 |
| chr19 | 18788031 | 18788290 |
| chr19 | 18807230 | 18807430 |
| chr19 | 21346789 | 21347210 |
| chr19 | 21727774 | 21728421 |
| chr19 | 21852830 | 21853482 |

|       |          |          |
|-------|----------|----------|
| chr19 | 21867313 | 21867502 |
| chr19 | 22011833 | 22011937 |
| chr19 | 22926621 | 22926719 |
| chr19 | 23145558 | 23145671 |
| chr19 | 23215308 | 23217616 |
| chr19 | 23762060 | 23762260 |
| chr19 | 29175894 | 29176548 |
| chr19 | 29181487 | 29181814 |
| chr19 | 29186936 | 29187441 |
| chr19 | 29198467 | 29198905 |
| chr19 | 29207275 | 29207548 |
| chr19 | 30105009 | 30105332 |
| chr19 | 30140456 | 30140840 |
| chr19 | 32463900 | 32464229 |
| chr19 | 32560409 | 32560603 |
| chr19 | 32832153 | 32832990 |
| chr19 | 32875270 | 32875528 |
| chr19 | 34028723 | 34028876 |
| chr19 | 35017146 | 35017396 |
| chr19 | 36908714 | 36909578 |
| chr19 | 36930052 | 36930420 |
| chr19 | 37010878 | 37010981 |
| chr19 | 37026850 | 37027212 |
| chr19 | 37479394 | 37479551 |
| chr19 | 37495264 | 37495555 |
| chr19 | 38129600 | 38129800 |
| chr19 | 38919496 | 38919602 |
| chr19 | 39005897 | 39006255 |
| chr19 | 40194200 | 40194430 |
| chr19 | 40968543 | 40968827 |
| chr19 | 41168373 | 41168568 |
| chr19 | 41558081 | 41558425 |
| chr19 | 41577472 | 41577776 |
| chr19 | 41617442 | 41617558 |
| chr19 | 42056050 | 42057647 |
| chr19 | 42062242 | 42062819 |
| chr19 | 42069073 | 42069403 |
| chr19 | 42075472 | 42075923 |
| chr19 | 42096630 | 42097205 |
| chr19 | 42180245 | 42180399 |
| chr19 | 42222384 | 42223137 |
| chr19 | 42245105 | 42245396 |
| chr19 | 42259933 | 42260381 |

|       |          |          |
|-------|----------|----------|
| chr19 | 42264957 | 42266084 |
| chr19 | 42593362 | 42593644 |
| chr19 | 43514907 | 43515246 |
| chr19 | 43515781 | 43515977 |
| chr19 | 44368577 | 44369021 |
| chr19 | 44377361 | 44381375 |
| chr19 | 44991302 | 44991386 |
| chr19 | 45076691 | 45077362 |
| chr19 | 45093363 | 45093520 |
| chr19 | 45095861 | 45096215 |
| chr19 | 45099119 | 45099372 |
| chr19 | 45469714 | 45469923 |
| chr19 | 45638144 | 45638247 |
| chr19 | 46131450 | 46132344 |
| chr19 | 46138671 | 46139659 |
| chr19 | 46673611 | 46673898 |
| chr19 | 46691779 | 46692169 |
| chr19 | 46858465 | 46859064 |
| chr19 | 46873077 | 46873293 |
| chr19 | 46916957 | 46917589 |
| chr19 | 47132650 | 47132799 |
| chr19 | 47182107 | 47182373 |
| chr19 | 47187955 | 47188307 |
| chr19 | 53217238 | 53217650 |
| chr19 | 53230280 | 53230515 |
| chr19 | 53414810 | 53414946 |
| chr19 | 53438022 | 53438118 |
| chr19 | 54019312 | 54019777 |
| chr19 | 54020180 | 54020332 |
| chr19 | 55421006 | 55421225 |
| chr19 | 55817046 | 55817446 |
| chr19 | 55848965 | 55849118 |
| chr19 | 55924593 | 55924958 |
| chr19 | 56005976 | 56006254 |
| chr19 | 56585829 | 56586202 |
| chr19 | 56586227 | 56586876 |
| chr19 | 56634815 | 56634921 |
| chr19 | 57685782 | 57686238 |
| chr19 | 57697614 | 57697821 |
| chr19 | 58588983 | 58589376 |
| chr19 | 58597656 | 58598490 |
| chr19 | 58631606 | 58632122 |
| chr2  | 3117193  | 3117373  |

|      |          |          |
|------|----------|----------|
| chr2 | 3216286  | 3216616  |
| chr2 | 4437077  | 4437228  |
| chr2 | 4663986  | 4664189  |
| chr2 | 4803158  | 4803396  |
| chr2 | 5884174  | 5884296  |
| chr2 | 6262141  | 6262264  |
| chr2 | 6287032  | 6287121  |
| chr2 | 10348786 | 10349097 |
| chr2 | 10386427 | 10386604 |
| chr2 | 10512571 | 10512985 |
| chr2 | 12849159 | 12849576 |
| chr2 | 13495932 | 13496459 |
| chr2 | 13995767 | 13995945 |
| chr2 | 17986214 | 17986729 |
| chr2 | 17986755 | 17987348 |
| chr2 | 17987536 | 17987626 |
| chr2 | 18013768 | 18013994 |
| chr2 | 18055473 | 18055615 |
| chr2 | 18065920 | 18066277 |
| chr2 | 18106468 | 18107464 |
| chr2 | 18122028 | 18122300 |
| chr2 | 20441129 | 20441548 |
| chr2 | 20442189 | 20442550 |
| chr2 | 20455101 | 20457371 |
| chr2 | 20463108 | 20464669 |
| chr2 | 20474321 | 20475411 |
| chr2 | 20522896 | 20523604 |
| chr2 | 20540770 | 20541203 |
| chr2 | 20550226 | 20550467 |
| chr2 | 20558307 | 20558542 |
| chr2 | 20600575 | 20601138 |
| chr2 | 20609700 | 20610109 |
| chr2 | 20652045 | 20652593 |
| chr2 | 20664987 | 20665884 |
| chr2 | 20711815 | 20712339 |
| chr2 | 20730338 | 20731058 |
| chr2 | 21137123 | 21137457 |
| chr2 | 21137865 | 21138249 |
| chr2 | 22443464 | 22443799 |
| chr2 | 22445177 | 22445503 |
| chr2 | 22969090 | 22969373 |
| chr2 | 23012057 | 23012269 |
| chr2 | 23033930 | 23034073 |

|      |          |          |
|------|----------|----------|
| chr2 | 23034571 | 23034856 |
| chr2 | 24805567 | 24805817 |
| chr2 | 24831093 | 24831714 |
| chr2 | 25118999 | 25119495 |
| chr2 | 25128004 | 25128177 |
| chr2 | 25205874 | 25206596 |
| chr2 | 25284220 | 25285181 |
| chr2 | 25562437 | 25562678 |
| chr2 | 26766330 | 26767142 |
| chr2 | 26767690 | 26768228 |
| chr2 | 26768288 | 26768723 |
| chr2 | 27257441 | 27257564 |
| chr2 | 27370680 | 27371278 |
| chr2 | 27390410 | 27391096 |
| chr2 | 27532888 | 27533906 |
| chr2 | 27741950 | 27742575 |
| chr2 | 27859376 | 27859484 |
| chr2 | 27885486 | 27885769 |
| chr2 | 27892510 | 27893089 |
| chr2 | 28289735 | 28289821 |
| chr2 | 28324709 | 28325030 |
| chr2 | 28325237 | 28325715 |
| chr2 | 28369102 | 28369570 |
| chr2 | 28742518 | 28742670 |
| chr2 | 28791961 | 28792196 |
| chr2 | 28919529 | 28919841 |
| chr2 | 28980627 | 28981179 |
| chr2 | 29024592 | 29024728 |
| chr2 | 29508131 | 29509112 |
| chr2 | 29528442 | 29528739 |
| chr2 | 29557731 | 29558198 |
| chr2 | 29565515 | 29566160 |
| chr2 | 29576978 | 29577227 |
| chr2 | 29745366 | 29746563 |
| chr2 | 29747864 | 29748544 |
| chr2 | 29760506 | 29760873 |
| chr2 | 29780865 | 29781650 |
| chr2 | 29786002 | 29786626 |
| chr2 | 29794782 | 29795270 |
| chr2 | 29802559 | 29802803 |
| chr2 | 29821203 | 29821348 |
| chr2 | 29886595 | 29887008 |
| chr2 | 29921493 | 29923239 |

|      |          |          |
|------|----------|----------|
| chr2 | 30000145 | 30000413 |
| chr2 | 30005714 | 30007002 |
| chr2 | 30150903 | 30151009 |
| chr2 | 30271816 | 30272441 |
| chr2 | 30299149 | 30299906 |
| chr2 | 30302169 | 30302497 |
| chr2 | 30329955 | 30330457 |
| chr2 | 30341406 | 30343569 |
| chr2 | 30350550 | 30351155 |
| chr2 | 30374851 | 30375084 |
| chr2 | 30416050 | 30416221 |
| chr2 | 30663531 | 30664047 |
| chr2 | 31013594 | 31013792 |
| chr2 | 31033840 | 31034213 |
| chr2 | 31072067 | 31072495 |
| chr2 | 31162315 | 31162538 |
| chr2 | 31349041 | 31349659 |
| chr2 | 31359758 | 31361101 |
| chr2 | 31428196 | 31429074 |
| chr2 | 31453445 | 31454037 |
| chr2 | 31559580 | 31560071 |
| chr2 | 31582783 | 31583301 |
| chr2 | 31849938 | 31850590 |
| chr2 | 31891645 | 31891742 |
| chr2 | 31902794 | 31903085 |
| chr2 | 32006546 | 32007211 |
| chr2 | 32014081 | 32016395 |
| chr2 | 32057738 | 32058780 |
| chr2 | 32079379 | 32080260 |
| chr2 | 32087725 | 32088155 |
| chr2 | 32428119 | 32428251 |
| chr2 | 32489083 | 32489374 |
| chr2 | 32489466 | 32489699 |
| chr2 | 32731922 | 32732423 |
| chr2 | 32779354 | 32779913 |
| chr2 | 32817206 | 32818165 |
| chr2 | 32818434 | 32819559 |
| chr2 | 33071637 | 33071899 |
| chr2 | 33833011 | 33833205 |
| chr2 | 34262494 | 34262866 |
| chr2 | 34627611 | 34628409 |
| chr2 | 34631363 | 34631934 |
| chr2 | 34659911 | 34660213 |

|      |          |          |
|------|----------|----------|
| chr2 | 34804942 | 34805060 |
| chr2 | 34806576 | 34806799 |
| chr2 | 35477343 | 35478185 |
| chr2 | 35500371 | 35500489 |
| chr2 | 35516927 | 35518071 |
| chr2 | 35518571 | 35519080 |
| chr2 | 35523990 | 35525135 |
| chr2 | 35583655 | 35584263 |
| chr2 | 35585215 | 35585546 |
| chr2 | 37137569 | 37137722 |
| chr2 | 37307608 | 37308703 |
| chr2 | 37372042 | 37372270 |
| chr2 | 38436973 | 38437132 |
| chr2 | 38883330 | 38883436 |
| chr2 | 39488636 | 39488860 |
| chr2 | 40143402 | 40143496 |
| chr2 | 40143594 | 40143686 |
| chr2 | 41628299 | 41628393 |
| chr2 | 45554105 | 45554776 |
| chr2 | 45565172 | 45565437 |
| chr2 | 48669714 | 48669956 |
| chr2 | 48709001 | 48709137 |
| chr2 | 48805363 | 48805727 |
| chr2 | 48848950 | 48849136 |
| chr2 | 48897915 | 48898207 |
| chr2 | 48996510 | 48996685 |
| chr2 | 49033209 | 49033488 |
| chr2 | 49307069 | 49307231 |
| chr2 | 49539319 | 49539584 |
| chr2 | 51928163 | 51928856 |
| chr2 | 51982356 | 51982978 |
| chr2 | 52716762 | 52717734 |
| chr2 | 52718028 | 52718419 |
| chr2 | 52726916 | 52727621 |
| chr2 | 52732818 | 52733070 |
| chr2 | 53051225 | 53051710 |
| chr2 | 53074578 | 53074700 |
| chr2 | 57034479 | 57034625 |
| chr2 | 58696194 | 58696282 |
| chr2 | 58998831 | 59000297 |
| chr2 | 59011763 | 59012164 |
| chr2 | 59040953 | 59041759 |
| chr2 | 59069893 | 59070378 |

|      |          |          |
|------|----------|----------|
| chr2 | 59084356 | 59085076 |
| chr2 | 59146060 | 59146567 |
| chr2 | 59450151 | 59450870 |
| chr2 | 59650095 | 59650831 |
| chr2 | 59656456 | 59657279 |
| chr2 | 60047983 | 60048654 |
| chr2 | 61549837 | 61550035 |
| chr2 | 62518248 | 62518834 |
| chr2 | 62523271 | 62523759 |
| chr2 | 65243910 | 65244182 |
| chr2 | 65966234 | 65966317 |
| chr2 | 67405315 | 67405514 |
| chr2 | 68708614 | 68708844 |
| chr2 | 69504287 | 69504457 |
| chr2 | 69561047 | 69561782 |
| chr2 | 69699683 | 69700233 |
| chr2 | 69701792 | 69701961 |
| chr2 | 69735470 | 69736019 |
| chr2 | 69762483 | 69762735 |
| chr2 | 69812600 | 69812930 |
| chr2 | 69833513 | 69833658 |
| chr2 | 70499724 | 70499989 |
| chr2 | 70528711 | 70528979 |
| chr2 | 71186021 | 71187481 |
| chr2 | 71188222 | 71188679 |
| chr2 | 71227006 | 71228219 |
| chr2 | 71240487 | 71240694 |
| chr2 | 71254724 | 71255209 |
| chr2 | 71275307 | 71275470 |
| chr2 | 71624990 | 71625993 |
| chr2 | 71694121 | 71694842 |
| chr2 | 71711387 | 71711916 |
| chr2 | 72228713 | 72228878 |
| chr2 | 72817872 | 72818467 |
| chr2 | 72818571 | 72819193 |
| chr2 | 72823298 | 72823629 |
| chr2 | 75497298 | 75498241 |
| chr2 | 75616264 | 75616357 |
| chr2 | 75670488 | 75670902 |
| chr2 | 75685445 | 75685565 |
| chr2 | 75753370 | 75753766 |
| chr2 | 75765897 | 75766295 |
| chr2 | 76208069 | 76208302 |



|      |           |           |
|------|-----------|-----------|
| chr2 | 76219435  | 76219835  |
| chr2 | 80182819  | 80182923  |
| chr2 | 80478049  | 80478146  |
| chr2 | 83484894  | 83485190  |
| chr2 | 83490398  | 83490691  |
| chr2 | 83564585  | 83565091  |
| chr2 | 83646899  | 83647048  |
| chr2 | 84888460  | 84888843  |
| chr2 | 84912757  | 84913164  |
| chr2 | 86682891  | 86682990  |
| chr2 | 90492593  | 90492678  |
| chr2 | 90585795  | 90586121  |
| chr2 | 90607661  | 90608038  |
| chr2 | 90615598  | 90615796  |
| chr2 | 90687425  | 90688019  |
| chr2 | 90780646  | 90781844  |
| chr2 | 90790060  | 90791405  |
| chr2 | 90833076  | 90833276  |
| chr2 | 90856208  | 90856950  |
| chr2 | 90857081  | 90858200  |
| chr2 | 90897302  | 90897879  |
| chr2 | 91116823  | 91117009  |
| chr2 | 91367401  | 91367777  |
| chr2 | 91436201  | 91436390  |
| chr2 | 91570325  | 91570759  |
| chr2 | 91612522  | 91613082  |
| chr2 | 91613351  | 91613836  |
| chr2 | 92024055  | 92024346  |
| chr2 | 92025339  | 92025657  |
| chr2 | 92025687  | 92025912  |
| chr2 | 92131171  | 92131417  |
| chr2 | 92221250  | 92221559  |
| chr2 | 93028052  | 93028389  |
| chr2 | 93032461  | 93032935  |
| chr2 | 93040370  | 93041464  |
| chr2 | 98502405  | 98502689  |
| chr2 | 98506721  | 98507223  |
| chr2 | 98507233  | 98507527  |
| chr2 | 101538303 | 101538527 |
| chr2 | 102738115 | 102738257 |
| chr2 | 103875822 | 103876086 |
| chr2 | 104399834 | 104399936 |
| chr2 | 104400082 | 104400702 |

|      |           |           |
|------|-----------|-----------|
| chr2 | 104406437 | 104407144 |
| chr2 | 104408157 | 104408815 |
| chr2 | 104430902 | 104431288 |
| chr2 | 105750900 | 105751077 |
| chr2 | 106643458 | 106643668 |
| chr2 | 109757763 | 109758568 |
| chr2 | 110058185 | 110058295 |
| chr2 | 112105673 | 112107044 |
| chr2 | 112151019 | 112151216 |
| chr2 | 112201902 | 112202176 |
| chr2 | 112219521 | 112219873 |
| chr2 | 112353505 | 112353623 |
| chr2 | 113128446 | 113128638 |
| chr2 | 113365681 | 113365920 |
| chr2 | 113513063 | 113513174 |
| chr2 | 113929100 | 113929227 |
| chr2 | 115409735 | 115409971 |
| chr2 | 115416509 | 115416825 |
| chr2 | 116946657 | 116947733 |
| chr2 | 117073998 | 117074212 |
| chr2 | 117937626 | 117937893 |
| chr2 | 117938749 | 117939279 |
| chr2 | 117943804 | 117944116 |
| chr2 | 117950760 | 117951211 |
| chr2 | 117951298 | 117951871 |
| chr2 | 117951902 | 117952480 |
| chr2 | 118214410 | 118214780 |
| chr2 | 118263188 | 118263550 |
| chr2 | 118660956 | 118661334 |
| chr2 | 118727182 | 118727702 |
| chr2 | 118872894 | 118873329 |
| chr2 | 119063313 | 119063821 |
| chr2 | 119411207 | 119411468 |
| chr2 | 119456894 | 119456994 |
| chr2 | 119500822 | 119501412 |
| chr2 | 119568272 | 119568530 |
| chr2 | 119706535 | 119706771 |
| chr2 | 119730256 | 119730651 |
| chr2 | 119749152 | 119749855 |
| chr2 | 119761092 | 119761474 |
| chr2 | 119772555 | 119773021 |
| chr2 | 119856423 | 119856536 |
| chr2 | 119859500 | 119859786 |

|      |           |           |
|------|-----------|-----------|
| chr2 | 120326870 | 120327150 |
| chr2 | 120372100 | 120372194 |
| chr2 | 120494685 | 120495105 |
| chr2 | 120495174 | 120495296 |
| chr2 | 120496049 | 120496290 |
| chr2 | 120829824 | 120830089 |
| chr2 | 121239677 | 121240300 |
| chr2 | 121263348 | 121263756 |
| chr2 | 121369288 | 121370173 |
| chr2 | 121692716 | 121693023 |
| chr2 | 121787632 | 121787882 |
| chr2 | 121854647 | 121855169 |
| chr2 | 121973439 | 121973580 |
| chr2 | 122203692 | 122203864 |
| chr2 | 122572917 | 122573316 |
| chr2 | 124930743 | 124930878 |
| chr2 | 125973627 | 125973717 |
| chr2 | 126570111 | 126570439 |
| chr2 | 126834648 | 126834864 |
| chr2 | 127044777 | 127044962 |
| chr2 | 127074059 | 127074341 |
| chr2 | 127255840 | 127257424 |
| chr2 | 128552817 | 128553007 |
| chr2 | 128793385 | 128793962 |
| chr2 | 128814645 | 128814886 |
| chr2 | 128830708 | 128830909 |
| chr2 | 128958984 | 128959415 |
| chr2 | 129024557 | 129024730 |
| chr2 | 129036771 | 129037101 |
| chr2 | 129626468 | 129627230 |
| chr2 | 129654777 | 129655855 |
| chr2 | 129657069 | 129657362 |
| chr2 | 130101226 | 130101525 |
| chr2 | 130101815 | 130103237 |
| chr2 | 130103387 | 130103647 |
| chr2 | 130103700 | 130103889 |
| chr2 | 130276258 | 130276557 |
| chr2 | 130329899 | 130330099 |
| chr2 | 130389751 | 130390086 |
| chr2 | 130499624 | 130499960 |
| chr2 | 131088330 | 131088652 |
| chr2 | 131091197 | 131091449 |
| chr2 | 132088849 | 132089583 |

|      |           |           |
|------|-----------|-----------|
| chr2 | 132103929 | 132104412 |
| chr2 | 132542233 | 132542350 |
| chr2 | 132643901 | 132644219 |
| chr2 | 132834204 | 132834445 |
| chr2 | 134113365 | 134113598 |
| chr2 | 135472529 | 135472793 |
| chr2 | 135485240 | 135485847 |
| chr2 | 136766155 | 136766253 |
| chr2 | 138082792 | 138083075 |
| chr2 | 140221241 | 140221407 |
| chr2 | 140221541 | 140221780 |
| chr2 | 141466238 | 141466365 |
| chr2 | 144463862 | 144464370 |
| chr2 | 146838977 | 146839356 |
| chr2 | 146861388 | 146861614 |
| chr2 | 146871148 | 146871266 |
| chr2 | 150030565 | 150030849 |
| chr2 | 150099792 | 150100357 |
| chr2 | 150105837 | 150106443 |
| chr2 | 150108225 | 150108547 |
| chr2 | 150613733 | 150613881 |
| chr2 | 151336817 | 151336971 |
| chr2 | 151369324 | 151369812 |
| chr2 | 151386399 | 151386625 |
| chr2 | 152098666 | 152098849 |
| chr2 | 152495218 | 152496099 |
| chr2 | 152561990 | 152562184 |
| chr2 | 152987478 | 152987909 |
| chr2 | 153011161 | 153011629 |
| chr2 | 153026054 | 153026318 |
| chr2 | 153035362 | 153036206 |
| chr2 | 153067981 | 153068178 |
| chr2 | 153079840 | 153080395 |
| chr2 | 153171563 | 153172473 |
| chr2 | 153183571 | 153184318 |
| chr2 | 153189077 | 153189488 |
| chr2 | 153190360 | 153190784 |
| chr2 | 153195897 | 153196204 |
| chr2 | 153202858 | 153203141 |
| chr2 | 153205455 | 153205621 |
| chr2 | 153224982 | 153225970 |
| chr2 | 153567146 | 153567389 |
| chr2 | 153571386 | 153571507 |

|      |           |           |
|------|-----------|-----------|
| chr2 | 154262243 | 154263024 |
| chr2 | 154264419 | 154264870 |
| chr2 | 154298463 | 154298887 |
| chr2 | 154326355 | 154326466 |
| chr2 | 154363587 | 154364287 |
| chr2 | 154439295 | 154439628 |
| chr2 | 154441550 | 154441693 |
| chr2 | 154617091 | 154618010 |
| chr2 | 154631813 | 154632410 |
| chr2 | 154692683 | 154692944 |
| chr2 | 155040089 | 155040183 |
| chr2 | 155212718 | 155213153 |
| chr2 | 155791308 | 155791773 |
| chr2 | 155814814 | 155815302 |
| chr2 | 156022549 | 156023132 |
| chr2 | 156100360 | 156100531 |
| chr2 | 156247780 | 156247923 |
| chr2 | 156292014 | 156292400 |
| chr2 | 156338802 | 156339323 |
| chr2 | 156526516 | 156526633 |
| chr2 | 156546651 | 156548428 |
| chr2 | 156688917 | 156689242 |
| chr2 | 157109321 | 157109483 |
| chr2 | 157115191 | 157115403 |
| chr2 | 157116294 | 157116482 |
| chr2 | 157123146 | 157123435 |
| chr2 | 157249611 | 157250709 |
| chr2 | 157287308 | 157288310 |
| chr2 | 157663071 | 157663352 |
| chr2 | 157663418 | 157664147 |
| chr2 | 157748836 | 157748972 |
| chr2 | 158207407 | 158208523 |
| chr2 | 158602852 | 158603657 |
| chr2 | 158629828 | 158630141 |
| chr2 | 158650751 | 158651237 |
| chr2 | 158658990 | 158659265 |
| chr2 | 158675256 | 158676277 |
| chr2 | 158683218 | 158683917 |
| chr2 | 160472040 | 160472273 |
| chr2 | 160472352 | 160472792 |
| chr2 | 160507549 | 160507846 |
| chr2 | 160511865 | 160511991 |
| chr2 | 162218623 | 162219542 |

|      |           |           |
|------|-----------|-----------|
| chr2 | 162236217 | 162236380 |
| chr2 | 162266610 | 162266714 |
| chr2 | 162757824 | 162758234 |
| chr2 | 162760291 | 162760729 |
| chr2 | 162880153 | 162881756 |
| chr2 | 162899236 | 162899729 |
| chr2 | 163820918 | 163821075 |
| chr2 | 163821169 | 163821405 |
| chr2 | 163926667 | 163926843 |
| chr2 | 163953571 | 163953958 |
| chr2 | 164323054 | 164323280 |
| chr2 | 164595410 | 164596003 |
| chr2 | 164664692 | 164665131 |
| chr2 | 165641881 | 165646452 |
| chr2 | 165825368 | 165825600 |
| chr2 | 165867558 | 165867794 |
| chr2 | 165979910 | 165980144 |
| chr2 | 166267393 | 166267480 |
| chr2 | 166619408 | 166619598 |
| chr2 | 166651033 | 166651203 |
| chr2 | 166731529 | 166732275 |
| chr2 | 166888724 | 166889410 |
| chr2 | 166890395 | 166891009 |
| chr2 | 167260215 | 167260427 |
| chr2 | 167274517 | 167277072 |
| chr2 | 167295471 | 167295997 |
| chr2 | 167299716 | 167301533 |
| chr2 | 167757849 | 167758482 |
| chr2 | 167836653 | 167836738 |
| chr2 | 168137287 | 168137589 |
| chr2 | 168784593 | 168784950 |
| chr2 | 168814229 | 168814800 |
| chr2 | 168844895 | 168845447 |
| chr2 | 169134101 | 169134284 |
| chr2 | 172438736 | 172439044 |
| chr2 | 172825613 | 172826173 |
| chr2 | 172838288 | 172839148 |
| chr2 | 173570831 | 173571201 |
| chr2 | 173901861 | 173902474 |
| chr2 | 173937842 | 173938342 |
| chr2 | 173946070 | 173946560 |
| chr2 | 174155466 | 174155913 |
| chr2 | 174155929 | 174156704 |

|      |           |           |
|------|-----------|-----------|
| chr2 | 174249157 | 174249585 |
| chr2 | 176819054 | 176819291 |
| chr2 | 176874656 | 176874907 |
| chr2 | 177500021 | 177500164 |
| chr2 | 177758064 | 177758289 |
| chr2 | 178219136 | 178219362 |
| chr2 | 179151169 | 179151443 |
| chr2 | 179818746 | 179819096 |
| chr2 | 179896854 | 179897093 |
| chr2 | 179909634 | 179909978 |
| chr2 | 179992124 | 179992805 |
| chr2 | 180192413 | 180192651 |
| chr2 | 180330259 | 180330482 |
| chr2 | 180356243 | 180356445 |
| chr2 | 180445435 | 180445684 |
| chr2 | 180452665 | 180453398 |
| chr2 | 180702024 | 180702397 |
| chr2 | 180716490 | 180717592 |
| chr2 | 180717899 | 180720251 |
| chr2 | 180731097 | 180732081 |
| chr2 | 180741943 | 180742657 |
| chr2 | 180751932 | 180752252 |
| chr2 | 181062931 | 181063378 |
| chr2 | 181089174 | 181090061 |
| chr2 | 181244394 | 181244748 |
| chr2 | 181352777 | 181352927 |
| chr3 | 3149508   | 3149612   |
| chr3 | 3198982   | 3199103   |
| chr3 | 4338997   | 4339167   |
| chr3 | 5750902   | 5751112   |
| chr3 | 8429151   | 8429292   |
| chr3 | 8545895   | 8546124   |
| chr3 | 9251285   | 9251738   |
| chr3 | 16083160  | 16083476  |
| chr3 | 16083547  | 16083899  |
| chr3 | 16096950  | 16097391  |
| chr3 | 16098016  | 16098317  |
| chr3 | 16112540  | 16112780  |
| chr3 | 19088316  | 19088669  |
| chr3 | 19090958  | 19091249  |
| chr3 | 19460252  | 19460443  |
| chr3 | 19528405  | 19528494  |
| chr3 | 19528805  | 19529111  |

|      |          |          |
|------|----------|----------|
| chr3 | 19971781 | 19971967 |
| chr3 | 21975567 | 21976399 |
| chr3 | 22019152 | 22019382 |
| chr3 | 22083479 | 22083845 |
| chr3 | 22096517 | 22096704 |
| chr3 | 27137147 | 27137248 |
| chr3 | 30500191 | 30500307 |
| chr3 | 30692353 | 30692848 |
| chr3 | 30754926 | 30755179 |
| chr3 | 30780607 | 30780791 |
| chr3 | 30908684 | 30909084 |
| chr3 | 30949262 | 30949353 |
| chr3 | 30994040 | 30994471 |
| chr3 | 31020138 | 31020319 |
| chr3 | 32296462 | 32296905 |
| chr3 | 32328279 | 32328410 |
| chr3 | 32409497 | 32409694 |
| chr3 | 32409730 | 32410235 |
| chr3 | 32607714 | 32608289 |
| chr3 | 33699115 | 33699544 |
| chr3 | 33919021 | 33920081 |
| chr3 | 33968271 | 33968530 |
| chr3 | 34548931 | 34550839 |
| chr3 | 35653053 | 35653440 |
| chr3 | 35722189 | 35722756 |
| chr3 | 35981777 | 35982072 |
| chr3 | 36886372 | 36886565 |
| chr3 | 37431333 | 37431560 |
| chr3 | 40507952 | 40508183 |
| chr3 | 40603992 | 40604216 |
| chr3 | 40753900 | 40754537 |
| chr3 | 41359682 | 41360478 |
| chr3 | 41360518 | 41360952 |
| chr3 | 41360963 | 41362055 |
| chr3 | 41366613 | 41370929 |
| chr3 | 41393411 | 41394587 |
| chr3 | 41394637 | 41395355 |
| chr3 | 41418324 | 41418937 |
| chr3 | 46114709 | 46114795 |
| chr3 | 48758638 | 48758848 |
| chr3 | 48883636 | 48883747 |
| chr3 | 48901498 | 48901753 |
| chr3 | 48935424 | 48935613 |



|      |          |          |
|------|----------|----------|
| chr3 | 51001061 | 51001250 |
| chr3 | 51028547 | 51029505 |
| chr3 | 51162270 | 51162391 |
| chr3 | 51163328 | 51163440 |
| chr3 | 51220200 | 51221189 |
| chr3 | 51908837 | 51909068 |
| chr3 | 52072382 | 52072954 |
| chr3 | 52073604 | 52073918 |
| chr3 | 52092021 | 52092411 |
| chr3 | 53282754 | 53283012 |
| chr3 | 54539445 | 54539600 |
| chr3 | 54916221 | 54916621 |
| chr3 | 54988169 | 54988386 |
| chr3 | 54996689 | 54996876 |
| chr3 | 55011710 | 55011941 |
| chr3 | 57540058 | 57540223 |
| chr3 | 57594406 | 57594497 |
| chr3 | 58218685 | 58219242 |
| chr3 | 58887820 | 58888222 |
| chr3 | 59235935 | 59236093 |
| chr3 | 59236594 | 59236750 |
| chr3 | 59236814 | 59237041 |
| chr3 | 60360377 | 60360576 |
| chr3 | 65332489 | 65332996 |
| chr3 | 65333039 | 65333287 |
| chr3 | 65481887 | 65482218 |
| chr3 | 66718281 | 66718384 |
| chr3 | 66859879 | 66860034 |
| chr3 | 66869986 | 66870192 |
| chr3 | 67126360 | 67126497 |
| chr3 | 67270323 | 67270599 |
| chr3 | 67406766 | 67407009 |
| chr3 | 68299126 | 68299885 |
| chr3 | 68380583 | 68380879 |
| chr3 | 68808919 | 68810100 |
| chr3 | 69148207 | 69149093 |
| chr3 | 75368651 | 75368768 |
| chr3 | 79399309 | 79399735 |
| chr3 | 80954004 | 80954221 |
| chr3 | 83374613 | 83374803 |
| chr3 | 83506186 | 83506305 |
| chr3 | 84618530 | 84619669 |
| chr3 | 84673103 | 84673389 |

|      |          |          |
|------|----------|----------|
| chr3 | 84734833 | 84734954 |
| chr3 | 85382123 | 85382389 |
| chr3 | 85444285 | 85444960 |
| chr3 | 85775045 | 85775870 |
| chr3 | 85795827 | 85796544 |
| chr3 | 85798628 | 85798839 |
| chr3 | 85802287 | 85802569 |
| chr3 | 85836343 | 85836686 |
| chr3 | 85837556 | 85837775 |
| chr3 | 86122929 | 86123233 |
| chr3 | 86188167 | 86188277 |
| chr3 | 86209766 | 86209920 |
| chr3 | 86261913 | 86262100 |
| chr3 | 86324216 | 86324379 |
| chr3 | 87538300 | 87538421 |
| chr3 | 87718451 | 87719228 |
| chr3 | 87719680 | 87720100 |
| chr3 | 87908409 | 87909647 |
| chr3 | 87924337 | 87924902 |
| chr3 | 87946273 | 87946830 |
| chr3 | 87998103 | 87998207 |
| chr3 | 88101060 | 88101514 |
| chr3 | 88140472 | 88140752 |
| chr3 | 88155252 | 88156558 |
| chr3 | 88165002 | 88165704 |
| chr3 | 88335875 | 88336493 |
| chr3 | 88342334 | 88342803 |
| chr3 | 88357859 | 88358461 |
| chr3 | 88367017 | 88367351 |
| chr3 | 88371826 | 88372363 |
| chr3 | 88382414 | 88382938 |
| chr3 | 88424948 | 88425602 |
| chr3 | 88497851 | 88498114 |
| chr3 | 88589588 | 88589823 |
| chr3 | 88603786 | 88603982 |
| chr3 | 88627119 | 88627343 |
| chr3 | 88644868 | 88644984 |
| chr3 | 88684242 | 88684441 |
| chr3 | 88754582 | 88755197 |
| chr3 | 88788878 | 88789275 |
| chr3 | 88833980 | 88834103 |
| chr3 | 88968731 | 88969233 |
| chr3 | 88973149 | 88973579 |

|      |          |          |
|------|----------|----------|
| chr3 | 88981304 | 88981622 |
| chr3 | 89225823 | 89226278 |
| chr3 | 89243033 | 89243382 |
| chr3 | 89519279 | 89519818 |
| chr3 | 89522522 | 89522801 |
| chr3 | 89577478 | 89577991 |
| chr3 | 89883819 | 89884354 |
| chr3 | 89887030 | 89887528 |
| chr3 | 89892234 | 89893145 |
| chr3 | 89895607 | 89896038 |
| chr3 | 90056249 | 90056388 |
| chr3 | 90063002 | 90063262 |
| chr3 | 90064485 | 90065225 |
| chr3 | 90070433 | 90070764 |
| chr3 | 90083818 | 90084019 |
| chr3 | 90097062 | 90098243 |
| chr3 | 90151179 | 90151448 |
| chr3 | 90417665 | 90417983 |
| chr3 | 90903221 | 90903309 |
| chr3 | 92493280 | 92493510 |
| chr3 | 94251678 | 94252035 |
| chr3 | 94642056 | 94642301 |
| chr3 | 94668051 | 94668288 |
| chr3 | 94764017 | 94764459 |
| chr3 | 94808961 | 94809272 |
| chr3 | 94926527 | 94926827 |
| chr3 | 94976096 | 94976546 |
| chr3 | 94977335 | 94977715 |
| chr3 | 95033382 | 95033601 |
| chr3 | 95238546 | 95238808 |
| chr3 | 95300576 | 95300822 |
| chr3 | 95462446 | 95464086 |
| chr3 | 95481669 | 95482060 |
| chr3 | 95622586 | 95622787 |
| chr3 | 95685693 | 95685913 |
| chr3 | 95908490 | 95909044 |
| chr3 | 95935490 | 95935863 |
| chr3 | 95980283 | 95980463 |
| chr3 | 96052573 | 96052698 |
| chr3 | 96073642 | 96074162 |
| chr3 | 96125998 | 96126117 |
| chr3 | 96132346 | 96132574 |
| chr3 | 96136655 | 96136775 |

|      |           |           |
|------|-----------|-----------|
| chr3 | 96150591  | 96150719  |
| chr3 | 96177941  | 96178156  |
| chr3 | 96186827  | 96186956  |
| chr3 | 96206137  | 96206257  |
| chr3 | 96213987  | 96214233  |
| chr3 | 96226651  | 96226864  |
| chr3 | 96232156  | 96232275  |
| chr3 | 96239891  | 96240017  |
| chr3 | 96254367  | 96254581  |
| chr3 | 96255366  | 96255471  |
| chr3 | 96256414  | 96256540  |
| chr3 | 96283322  | 96283426  |
| chr3 | 96292648  | 96292862  |
| chr3 | 96301699  | 96301829  |
| chr3 | 96361882  | 96365872  |
| chr3 | 96531663  | 96531954  |
| chr3 | 96562480  | 96562630  |
| chr3 | 96961997  | 96962129  |
| chr3 | 96962753  | 96963406  |
| chr3 | 96970211  | 96971029  |
| chr3 | 97817756  | 97818008  |
| chr3 | 97887958  | 97888506  |
| chr3 | 97894260  | 97894362  |
| chr3 | 101150108 | 101150198 |
| chr3 | 101181778 | 101182404 |
| chr3 | 101265426 | 101265684 |
| chr3 | 101276237 | 101276437 |
| chr3 | 102832657 | 102833012 |
| chr3 | 102914009 | 102914813 |
| chr3 | 102949649 | 102950073 |
| chr3 | 103084083 | 103084687 |
| chr3 | 103139725 | 103139997 |
| chr3 | 103231358 | 103231513 |
| chr3 | 103395382 | 103395500 |
| chr3 | 103718719 | 103719040 |
| chr3 | 103798368 | 103798474 |
| chr3 | 104442620 | 104443015 |
| chr3 | 104453253 | 104453506 |
| chr3 | 104668031 | 104668384 |
| chr3 | 104808794 | 104809006 |
| chr3 | 106525028 | 106525328 |
| chr3 | 108115829 | 108116010 |
| chr3 | 108186784 | 108187521 |

|      |           |           |
|------|-----------|-----------|
| chr3 | 108187781 | 108188537 |
| chr3 | 108189062 | 108189558 |
| chr3 | 109666719 | 109666827 |
| chr3 | 116298031 | 116298246 |
| chr3 | 118266034 | 118266181 |
| chr3 | 121129746 | 121130921 |
| chr3 | 121138277 | 121138962 |
| chr3 | 121156181 | 121156795 |
| chr3 | 121160770 | 121161031 |
| chr3 | 121948584 | 121949318 |
| chr3 | 121996571 | 121996823 |
| chr3 | 122142029 | 122142417 |
| chr3 | 122146865 | 122147064 |
| chr3 | 122192732 | 122193419 |
| chr3 | 122201406 | 122201831 |
| chr3 | 122223862 | 122224251 |
| chr3 | 123020762 | 123021077 |
| chr3 | 126808949 | 126809126 |
| chr3 | 127265627 | 127265868 |
| chr3 | 127316912 | 127317024 |
| chr3 | 129213700 | 129213800 |
| chr3 | 129235668 | 129236415 |
| chr3 | 129236426 | 129237807 |
| chr3 | 129246875 | 129248053 |
| chr3 | 129771309 | 129771512 |
| chr3 | 129908387 | 129908514 |
| chr3 | 131807396 | 131807598 |
| chr3 | 132355363 | 132355465 |
| chr3 | 133003459 | 133003866 |
| chr3 | 134436698 | 134436786 |
| chr3 | 134912189 | 134912366 |
| chr3 | 135021820 | 135022103 |
| chr3 | 135027609 | 135027771 |
| chr3 | 135101249 | 135103211 |
| chr3 | 135184465 | 135184558 |
| chr3 | 135193004 | 135193202 |
| chr3 | 136333075 | 136333549 |
| chr3 | 136333632 | 136334089 |
| chr3 | 136358962 | 136359112 |
| chr3 | 136384183 | 136384427 |
| chr3 | 136416584 | 136416682 |
| chr3 | 137378660 | 137378769 |
| chr3 | 137527554 | 137528300 |

|      |           |           |
|------|-----------|-----------|
| chr3 | 137581587 | 137581962 |
| chr3 | 138107274 | 138107362 |
| chr3 | 138115321 | 138115762 |
| chr3 | 138190205 | 138191185 |
| chr3 | 138406216 | 138407631 |
| chr3 | 138413543 | 138414497 |
| chr3 | 142408944 | 142409149 |
| chr3 | 144259782 | 144260398 |
| chr3 | 145651653 | 145651882 |
| chr3 | 148691894 | 148692027 |
| chr3 | 148715517 | 148715820 |
| chr3 | 151271325 | 151271460 |
| chr3 | 151873497 | 151874322 |
| chr3 | 151875436 | 151875952 |
| chr3 | 151892746 | 151893176 |
| chr3 | 152047244 | 152047424 |
| chr3 | 152059128 | 152060180 |
| chr3 | 156225337 | 156225541 |
| chr4 | 3866241   | 3866456   |
| chr4 | 6381091   | 6381276   |
| chr4 | 7318913   | 7318999   |
| chr4 | 8462807   | 8463123   |
| chr4 | 8618017   | 8618508   |
| chr4 | 8618587   | 8619091   |
| chr4 | 8664839   | 8664970   |
| chr4 | 10801208  | 10801340  |
| chr4 | 11083592  | 11084094  |
| chr4 | 11098285  | 11099488  |
| chr4 | 11500248  | 11500841  |
| chr4 | 12022042  | 12022258  |
| chr4 | 12041221  | 12041463  |
| chr4 | 12067593  | 12067832  |
| chr4 | 15192919  | 15194120  |
| chr4 | 15310329  | 15310430  |
| chr4 | 16603068  | 16603209  |
| chr4 | 21749382  | 21749476  |
| chr4 | 21858538  | 21858771  |
| chr4 | 22285152  | 22285549  |
| chr4 | 22324415  | 22324903  |
| chr4 | 24432065  | 24432401  |
| chr4 | 24454225  | 24454427  |
| chr4 | 24520725  | 24521041  |
| chr4 | 24534695  | 24535048  |

|      |          |          |
|------|----------|----------|
| chr4 | 24825457 | 24825660 |
| chr4 | 27627816 | 27627948 |
| chr4 | 27831919 | 27832048 |
| chr4 | 29512415 | 29512780 |
| chr4 | 32051003 | 32051396 |
| chr4 | 32704342 | 32704594 |
| chr4 | 32783765 | 32784642 |
| chr4 | 33051751 | 33051896 |
| chr4 | 33525680 | 33525767 |
| chr4 | 33553349 | 33553526 |
| chr4 | 34497920 | 34498771 |
| chr4 | 40669623 | 40669936 |
| chr4 | 41082550 | 41083379 |
| chr4 | 41321835 | 41321972 |
| chr4 | 41738565 | 41738670 |
| chr4 | 42963050 | 42963645 |
| chr4 | 42970458 | 42970656 |
| chr4 | 43071883 | 43072565 |
| chr4 | 43132418 | 43132689 |
| chr4 | 43395032 | 43395399 |
| chr4 | 43597166 | 43597652 |
| chr4 | 43644517 | 43645034 |
| chr4 | 43682437 | 43682741 |
| chr4 | 43888983 | 43889187 |
| chr4 | 43970694 | 43970941 |
| chr4 | 44363911 | 44364227 |
| chr4 | 44372995 | 44373263 |
| chr4 | 44837739 | 44837991 |
| chr4 | 44851771 | 44852053 |
| chr4 | 44938426 | 44938855 |
| chr4 | 45355613 | 45355848 |
| chr4 | 46463780 | 46464109 |
| chr4 | 46464212 | 46465885 |
| chr4 | 46508027 | 46508209 |
| chr4 | 47366436 | 47366704 |
| chr4 | 48598000 | 48598496 |
| chr4 | 48641695 | 48642585 |
| chr4 | 48694163 | 48694255 |
| chr4 | 49302180 | 49302297 |
| chr4 | 52463686 | 52463857 |
| chr4 | 52494371 | 52494607 |
| chr4 | 53361374 | 53361480 |
| chr4 | 53453279 | 53454444 |

|      |          |          |
|------|----------|----------|
| chr4 | 53849492 | 53849848 |
| chr4 | 53873541 | 53873689 |
| chr4 | 54958533 | 54958970 |
| chr4 | 54960063 | 54960769 |
| chr4 | 54968052 | 54968347 |
| chr4 | 55362948 | 55363741 |
| chr4 | 55383105 | 55383385 |
| chr4 | 57880412 | 57880658 |
| chr4 | 59202162 | 59202625 |
| chr4 | 59213736 | 59214248 |
| chr4 | 59234104 | 59234329 |
| chr4 | 59639218 | 59639353 |
| chr4 | 59639424 | 59639834 |
| chr4 | 61925359 | 61925457 |
| chr4 | 61956459 | 61956652 |
| chr4 | 62021734 | 62021959 |
| chr4 | 62049810 | 62050553 |
| chr4 | 62084976 | 62085071 |
| chr4 | 67685573 | 67685660 |
| chr4 | 74025673 | 74026009 |
| chr4 | 75167453 | 75167545 |
| chr4 | 79649794 | 79649925 |
| chr4 | 82975212 | 82975313 |
| chr4 | 83064995 | 83065087 |
| chr4 | 83334924 | 83335042 |
| chr4 | 84851516 | 84852098 |
| chr4 | 84852615 | 84852813 |
| chr4 | 84865497 | 84865988 |
| chr4 | 84923541 | 84923803 |
| chr4 | 84936251 | 84936388 |
| chr4 | 84983262 | 84983479 |
| chr4 | 85648897 | 85649090 |
| chr4 | 86124445 | 86124565 |
| chr4 | 86451042 | 86451291 |
| chr4 | 87078192 | 87078297 |
| chr4 | 87747741 | 87747995 |
| chr4 | 87811525 | 87811726 |
| chr4 | 87826712 | 87826831 |
| chr4 | 87893455 | 87893738 |
| chr4 | 87997402 | 87997875 |
| chr4 | 88794274 | 88794527 |
| chr4 | 88941209 | 88941404 |
| chr4 | 88948676 | 88949283 |



|      |           |           |
|------|-----------|-----------|
| chr4 | 88956261  | 88957028  |
| chr4 | 89055597  | 89055952  |
| chr4 | 89090940  | 89091155  |
| chr4 | 93001879  | 93002050  |
| chr4 | 93002228  | 93002548  |
| chr4 | 94341974  | 94342104  |
| chr4 | 94745928  | 94746148  |
| chr4 | 95224367  | 95224486  |
| chr4 | 95291579  | 95291866  |
| chr4 | 95476316  | 95476518  |
| chr4 | 95524189  | 95524277  |
| chr4 | 98393931  | 98394314  |
| chr4 | 98399436  | 98399820  |
| chr4 | 98590627  | 98590969  |
| chr4 | 99394680  | 99394980  |
| chr4 | 100754884 | 100755148 |
| chr4 | 101028646 | 101028923 |
| chr4 | 101092451 | 101093370 |
| chr4 | 101125202 | 101125669 |
| chr4 | 101137649 | 101138211 |
| chr4 | 101175326 | 101175726 |
| chr4 | 101181199 | 101181824 |
| chr4 | 101295610 | 101295879 |
| chr4 | 101330656 | 101331015 |
| chr4 | 101331503 | 101331761 |
| chr4 | 102791594 | 102792699 |
| chr4 | 102826177 | 102826298 |
| chr4 | 102836773 | 102836883 |
| chr4 | 103033873 | 103034146 |
| chr4 | 104040590 | 104041036 |
| chr4 | 104519665 | 104519771 |
| chr4 | 104834160 | 104834250 |
| chr4 | 105917870 | 105918771 |
| chr4 | 106040375 | 106040479 |
| chr4 | 106110129 | 106110686 |
| chr4 | 106233649 | 106234003 |
| chr4 | 106260241 | 106261596 |
| chr4 | 106584098 | 106584782 |
| chr4 | 106682317 | 106683105 |
| chr4 | 106851322 | 106851653 |
| chr4 | 107040588 | 107040921 |
| chr4 | 107071010 | 107071528 |
| chr4 | 107174949 | 107175139 |

|      |           |           |
|------|-----------|-----------|
| chr4 | 107246562 | 107246881 |
| chr4 | 107479843 | 107480100 |
| chr4 | 107567386 | 107567663 |
| chr4 | 107838144 | 107838373 |
| chr4 | 108004976 | 108005268 |
| chr4 | 108132621 | 108133188 |
| chr4 | 108252078 | 108252577 |
| chr4 | 108292685 | 108292989 |
| chr4 | 108297735 | 108298085 |
| chr4 | 108513417 | 108513566 |
| chr4 | 108520754 | 108520963 |
| chr4 | 108534455 | 108534684 |
| chr4 | 108673259 | 108673493 |
| chr4 | 108733628 | 108733876 |
| chr4 | 108953000 | 108953562 |
| chr4 | 108984908 | 108985018 |
| chr4 | 108993739 | 108993955 |
| chr4 | 109349201 | 109349387 |
| chr4 | 109352375 | 109352731 |
| chr4 | 109527380 | 109527604 |
| chr4 | 109632307 | 109632438 |
| chr4 | 115411048 | 115411288 |
| chr4 | 116247950 | 116248172 |
| chr4 | 116255096 | 116255375 |
| chr4 | 116719889 | 116720381 |
| chr4 | 116862549 | 116862719 |
| chr4 | 116875132 | 116875305 |
| chr4 | 116883448 | 116883619 |
| chr4 | 117223009 | 117223752 |
| chr4 | 117229171 | 117229436 |
| chr4 | 117230912 | 117231326 |
| chr4 | 117241747 | 117242074 |
| chr4 | 117287873 | 117289429 |
| chr4 | 117316973 | 117317278 |
| chr4 | 117317829 | 117318367 |
| chr4 | 117344594 | 117345015 |
| chr4 | 117422413 | 117422496 |
| chr4 | 118781407 | 118782137 |
| chr4 | 118808810 | 118809978 |
| chr4 | 118905557 | 118906015 |
| chr4 | 118948538 | 118948631 |
| chr4 | 119200619 | 119200709 |
| chr4 | 119212303 | 119212708 |

|      |           |           |
|------|-----------|-----------|
| chr4 | 119212781 | 119213111 |
| chr4 | 119292622 | 119293087 |
| chr4 | 120786830 | 120786917 |
| chr4 | 122726137 | 122726449 |
| chr4 | 122968583 | 122968763 |
| chr4 | 122970391 | 122970659 |
| chr4 | 123341092 | 123341333 |
| chr4 | 124406340 | 124406606 |
| chr4 | 124428916 | 124429533 |
| chr4 | 124442042 | 124442248 |
| chr4 | 124505266 | 124505416 |
| chr4 | 124510923 | 124511286 |
| chr4 | 124515948 | 124516061 |
| chr4 | 125167434 | 125170879 |
| chr4 | 125210167 | 125211692 |
| chr4 | 125240808 | 125242624 |
| chr4 | 125249631 | 125250279 |
| chr4 | 125309768 | 125310307 |
| chr4 | 125310534 | 125310736 |
| chr4 | 125781562 | 125781859 |
| chr4 | 125816437 | 125817141 |
| chr4 | 125825756 | 125826083 |
| chr4 | 126698566 | 126699796 |
| chr4 | 126709819 | 126710574 |
| chr4 | 126754645 | 126755094 |
| chr4 | 126804037 | 126804328 |
| chr4 | 126924669 | 126924953 |
| chr4 | 128561014 | 128561429 |
| chr4 | 128671612 | 128671897 |
| chr4 | 128735394 | 128736102 |
| chr4 | 128881789 | 128882133 |
| chr4 | 129058609 | 129058839 |
| chr4 | 129190879 | 129191250 |
| chr4 | 129497439 | 129498703 |
| chr4 | 129502624 | 129503029 |
| chr4 | 129784927 | 129785094 |
| chr4 | 130055575 | 130055747 |
| chr4 | 130125508 | 130125780 |
| chr4 | 130219316 | 130220431 |
| chr4 | 130227336 | 130227818 |
| chr4 | 130305423 | 130305897 |
| chr4 | 130330807 | 130331882 |
| chr4 | 130337125 | 130337440 |

|      |           |           |
|------|-----------|-----------|
| chr4 | 130469065 | 130469385 |
| chr4 | 130491027 | 130491684 |
| chr4 | 131429403 | 131430747 |
| chr4 | 131837101 | 131837352 |
| chr4 | 131844978 | 131845329 |
| chr4 | 131865249 | 131865573 |
| chr4 | 131865659 | 131866480 |
| chr4 | 131866511 | 131866818 |
| chr4 | 131997964 | 131998067 |
| chr4 | 132195078 | 132195409 |
| chr4 | 132269031 | 132269420 |
| chr4 | 132280136 | 132280588 |
| chr4 | 132333841 | 132334342 |
| chr4 | 132567511 | 132568075 |
| chr4 | 132569000 | 132569914 |
| chr4 | 132576053 | 132577263 |
| chr4 | 132582472 | 132583117 |
| chr4 | 132594362 | 132595714 |
| chr4 | 132603941 | 132604626 |
| chr4 | 132619219 | 132620429 |
| chr4 | 132700606 | 132700904 |
| chr4 | 132701264 | 132701582 |
| chr4 | 132712346 | 132712651 |
| chr4 | 132750221 | 132750792 |
| chr4 | 132925688 | 132926936 |
| chr4 | 132979078 | 132979538 |
| chr4 | 133075064 | 133075376 |
| chr4 | 133513824 | 133514051 |
| chr4 | 133523219 | 133523759 |
| chr4 | 133523874 | 133524604 |
| chr4 | 133843496 | 133843773 |
| chr4 | 134479548 | 134480410 |
| chr4 | 134481630 | 134482393 |
| chr4 | 135412069 | 135412816 |
| chr4 | 135415349 | 135415774 |
| chr4 | 135728634 | 135728947 |
| chr4 | 135866892 | 135867598 |
| chr4 | 136025677 | 136026876 |
| chr4 | 136051085 | 136052093 |
| chr4 | 136085743 | 136085834 |
| chr4 | 136101944 | 136102478 |
| chr4 | 136881470 | 136881563 |
| chr4 | 137024670 | 137026681 |

|      |           |           |
|------|-----------|-----------|
| chr4 | 137063897 | 137064630 |
| chr4 | 137085084 | 137085558 |
| chr4 | 137099054 | 137100075 |
| chr4 | 137103943 | 137104443 |
| chr4 | 137116856 | 137117216 |
| chr4 | 137120677 | 137120978 |
| chr4 | 137125201 | 137126690 |
| chr4 | 137150059 | 137151274 |
| chr4 | 137152813 | 137154233 |
| chr4 | 137158377 | 137160445 |
| chr4 | 137173986 | 137177393 |
| chr4 | 137213173 | 137214646 |
| chr4 | 137549300 | 137550435 |
| chr4 | 137554868 | 137555214 |
| chr4 | 137579082 | 137579329 |
| chr4 | 137591493 | 137591757 |
| chr4 | 137772492 | 137773756 |
| chr4 | 137860726 | 137860924 |
| chr4 | 137866369 | 137867373 |
| chr4 | 137996347 | 137996564 |
| chr4 | 138010241 | 138011139 |
| chr4 | 138092981 | 138093473 |
| chr4 | 138104684 | 138105105 |
| chr4 | 138110396 | 138110641 |
| chr4 | 138115578 | 138116505 |
| chr4 | 138125663 | 138126220 |
| chr4 | 138134381 | 138134830 |
| chr4 | 138748845 | 138750227 |
| chr4 | 138755056 | 138756932 |
| chr4 | 138777895 | 138778415 |
| chr4 | 138822042 | 138823239 |
| chr4 | 138845062 | 138846125 |
| chr4 | 138958390 | 138958596 |
| chr4 | 138987375 | 138987799 |
| chr4 | 139188033 | 139188324 |
| chr4 | 139204252 | 139204688 |
| chr4 | 139506812 | 139506907 |
| chr4 | 140258198 | 140259324 |
| chr4 | 140269556 | 140270899 |
| chr4 | 140276924 | 140277792 |
| chr4 | 140277796 | 140278693 |
| chr4 | 140463376 | 140463583 |
| chr4 | 140561917 | 140562721 |

|      |           |           |
|------|-----------|-----------|
| chr4 | 140703923 | 140704673 |
| chr4 | 140734927 | 140735318 |
| chr4 | 140857158 | 140857725 |
| chr4 | 140857734 | 140858994 |
| chr4 | 140884079 | 140885083 |
| chr4 | 145024486 | 145024955 |
| chr4 | 145028722 | 145029082 |
| chr4 | 145029562 | 145030264 |
| chr4 | 145038965 | 145039161 |
| chr4 | 145109101 | 145109288 |
| chr4 | 145116057 | 145116450 |
| chr4 | 145127862 | 145128104 |
| chr4 | 145184095 | 145184351 |
| chr4 | 145198212 | 145198304 |
| chr4 | 145268048 | 145268348 |
| chr4 | 145381132 | 145381307 |
| chr4 | 145391580 | 145391677 |
| chr4 | 146068430 | 146068618 |
| chr4 | 146140946 | 146141077 |
| chr4 | 146247540 | 146247684 |
| chr4 | 146349175 | 146349409 |
| chr4 | 146514958 | 146515229 |
| chr4 | 146523237 | 146523368 |
| chr4 | 146607807 | 146607916 |
| chr4 | 146616272 | 146616505 |
| chr4 | 146622576 | 146622675 |
| chr4 | 146622925 | 146623080 |
| chr4 | 146693605 | 146693740 |
| chr4 | 146756909 | 146757015 |
| chr4 | 146826829 | 146827207 |
| chr4 | 146831984 | 146832427 |
| chr4 | 146853147 | 146853538 |
| chr4 | 146937898 | 146938284 |
| chr4 | 146944578 | 146944711 |
| chr4 | 147315053 | 147315997 |
| chr4 | 147320547 | 147321074 |
| chr4 | 148179434 | 148179728 |
| chr4 | 148871536 | 148871955 |
| chr4 | 148892604 | 148893025 |
| chr4 | 148960586 | 148961585 |
| chr4 | 148996688 | 148996990 |
| chr4 | 149021485 | 149022059 |
| chr4 | 149191830 | 149191973 |

|      |           |           |
|------|-----------|-----------|
| chr4 | 149414717 | 149415019 |
| chr4 | 149442746 | 149443566 |
| chr4 | 149611362 | 149611642 |
| chr4 | 149655646 | 149656808 |
| chr4 | 149718148 | 149719132 |
| chr4 | 149746170 | 149746384 |
| chr4 | 149910961 | 149911320 |
| chr4 | 149973642 | 149974181 |
| chr4 | 149988689 | 149989938 |
| chr4 | 150028279 | 150028494 |
| chr4 | 150229311 | 150229647 |
| chr4 | 151348738 | 151349188 |
| chr4 | 151488035 | 151488563 |
| chr4 | 151552830 | 151552996 |
| chr4 | 151671230 | 151671547 |
| chr4 | 151699963 | 151700464 |
| chr4 | 151707211 | 151708062 |
| chr4 | 151899077 | 151899432 |
| chr4 | 152527152 | 152527329 |
| chr4 | 153332022 | 153332285 |
| chr4 | 153333521 | 153333778 |
| chr4 | 153523068 | 153523445 |
| chr4 | 153611178 | 153611307 |
| chr4 | 153634630 | 153634911 |
| chr4 | 154282778 | 154282871 |
| chr4 | 154865446 | 154866533 |
| chr4 | 154866575 | 154866788 |
| chr4 | 154876154 | 154876864 |
| chr4 | 154928983 | 154929392 |
| chr4 | 154932307 | 154932566 |
| chr4 | 154963799 | 154963928 |
| chr4 | 154975927 | 154976384 |
| chr4 | 155177762 | 155178134 |
| chr4 | 155193810 | 155194597 |
| chr4 | 155221572 | 155222270 |
| chr4 | 155228768 | 155229140 |
| chr4 | 155230814 | 155231082 |
| chr4 | 155231964 | 155232445 |
| chr4 | 155317999 | 155318242 |
| chr4 | 155327285 | 155327802 |
| chr4 | 155380087 | 155380279 |
| chr4 | 155494092 | 155495406 |
| chr4 | 155610065 | 155610755 |

|      |          |          |
|------|----------|----------|
| chr5 | 3461478  | 3461706  |
| chr5 | 3549597  | 3549828  |
| chr5 | 3578400  | 3578705  |
| chr5 | 3954110  | 3954341  |
| chr5 | 8426209  | 8426479  |
| chr5 | 8808756  | 8809001  |
| chr5 | 8833401  | 8833783  |
| chr5 | 9101023  | 9101291  |
| chr5 | 10193027 | 10193235 |
| chr5 | 18768537 | 18768714 |
| chr5 | 18775997 | 18776959 |
| chr5 | 20389966 | 20390093 |
| chr5 | 20930852 | 20931148 |
| chr5 | 21151805 | 21152023 |
| chr5 | 21295175 | 21295536 |
| chr5 | 22940385 | 22940604 |
| chr5 | 22950512 | 22950799 |
| chr5 | 23181984 | 23182205 |
| chr5 | 23356405 | 23356841 |
| chr5 | 23358025 | 23358144 |
| chr5 | 23979814 | 23980395 |
| chr5 | 24092577 | 24093023 |
| chr5 | 24093579 | 24094020 |
| chr5 | 25266206 | 25266546 |
| chr5 | 25274675 | 25275205 |
| chr5 | 25316536 | 25316787 |
| chr5 | 28397935 | 28398369 |
| chr5 | 28643949 | 28644227 |
| chr5 | 28716105 | 28716345 |
| chr5 | 28744758 | 28745247 |
| chr5 | 29864956 | 29865063 |
| chr5 | 29961603 | 29961731 |
| chr5 | 30969273 | 30969628 |
| chr5 | 30970713 | 30971310 |
| chr5 | 30971635 | 30972863 |
| chr5 | 31190458 | 31190610 |
| chr5 | 31190881 | 31191081 |
| chr5 | 31357157 | 31357425 |
| chr5 | 31475811 | 31475903 |
| chr5 | 31554186 | 31554472 |
| chr5 | 31873746 | 31874244 |
| chr5 | 32040523 | 32040799 |
| chr5 | 32205909 | 32206321 |



|      |          |          |
|------|----------|----------|
| chr5 | 32249597 | 32250234 |
| chr5 | 32438491 | 32439072 |
| chr5 | 32477493 | 32477600 |
| chr5 | 32761434 | 32762122 |
| chr5 | 32913620 | 32913779 |
| chr5 | 32913818 | 32914186 |
| chr5 | 32920196 | 32920632 |
| chr5 | 33073662 | 33073858 |
| chr5 | 33324745 | 33324973 |
| chr5 | 33361798 | 33362350 |
| chr5 | 33678311 | 33679000 |
| chr5 | 33687201 | 33687767 |
| chr5 | 34007879 | 34008137 |
| chr5 | 34679081 | 34679766 |
| chr5 | 34694199 | 34695251 |
| chr5 | 34712432 | 34713539 |
| chr5 | 34763563 | 34763729 |
| chr5 | 34803790 | 34804096 |
| chr5 | 34810894 | 34811225 |
| chr5 | 35104823 | 35105003 |
| chr5 | 35160334 | 35160750 |
| chr5 | 35208111 | 35208370 |
| chr5 | 36325200 | 36325323 |
| chr5 | 36345184 | 36345630 |
| chr5 | 36808167 | 36808353 |
| chr5 | 37259795 | 37260373 |
| chr5 | 37260851 | 37261449 |
| chr5 | 37271423 | 37271985 |
| chr5 | 37296606 | 37297112 |
| chr5 | 38447584 | 38447811 |
| chr5 | 38611711 | 38612129 |
| chr5 | 38623839 | 38624036 |
| chr5 | 38937694 | 38937815 |
| chr5 | 48410630 | 48410853 |
| chr5 | 53196091 | 53196414 |
| chr5 | 53975077 | 53976050 |
| chr5 | 53980023 | 53983275 |
| chr5 | 53993807 | 53994125 |
| chr5 | 53995580 | 53996560 |
| chr5 | 54010070 | 54010906 |
| chr5 | 54033394 | 54033835 |
| chr5 | 54054677 | 54054808 |
| chr5 | 54231128 | 54231327 |

|      |          |          |
|------|----------|----------|
| chr5 | 54389684 | 54390230 |
| chr5 | 60434070 | 60434174 |
| chr5 | 64801953 | 64802342 |
| chr5 | 64808376 | 64808786 |
| chr5 | 64822246 | 64822446 |
| chr5 | 65194681 | 65195717 |
| chr5 | 65928599 | 65929225 |
| chr5 | 65938580 | 65939035 |
| chr5 | 65952334 | 65952967 |
| chr5 | 65953008 | 65953343 |
| chr5 | 65953866 | 65954383 |
| chr5 | 66155720 | 66156110 |
| chr5 | 66179222 | 66179308 |
| chr5 | 66219749 | 66219979 |
| chr5 | 66221004 | 66221187 |
| chr5 | 67067668 | 67068295 |
| chr5 | 67681615 | 67681741 |
| chr5 | 67871083 | 67871843 |
| chr5 | 70117703 | 70117793 |
| chr5 | 70310333 | 70310432 |
| chr5 | 73365699 | 73365869 |
| chr5 | 73684025 | 73684477 |
| chr5 | 73699766 | 73699981 |
| chr5 | 73882763 | 73883077 |
| chr5 | 74489163 | 74489718 |
| chr5 | 74931538 | 74931980 |
| chr5 | 75970988 | 75972197 |
| chr5 | 75990125 | 75991031 |
| chr5 | 75992164 | 75992688 |
| chr5 | 76050293 | 76051051 |
| chr5 | 76052016 | 76052795 |
| chr5 | 76612978 | 76613362 |
| chr5 | 76618765 | 76619077 |
| chr5 | 76997152 | 76997323 |
| chr5 | 77694385 | 77695985 |
| chr5 | 87233284 | 87233933 |
| chr5 | 87239718 | 87239837 |
| chr5 | 88994278 | 88994932 |
| chr5 | 89041521 | 89041792 |
| chr5 | 89149938 | 89150403 |
| chr5 | 89150505 | 89151258 |
| chr5 | 89189961 | 89190200 |
| chr5 | 89965258 | 89965370 |

|      |           |           |
|------|-----------|-----------|
| chr5 | 92567048  | 92567632  |
| chr5 | 93370772  | 93371210  |
| chr5 | 93522499  | 93523083  |
| chr5 | 93539122  | 93539227  |
| chr5 | 96296368  | 96296472  |
| chr5 | 96678371  | 96678989  |
| chr5 | 96687918  | 96688667  |
| chr5 | 97903697  | 97903796  |
| chr5 | 104121192 | 104122273 |
| chr5 | 104132546 | 104132921 |
| chr5 | 104151773 | 104152357 |
| chr5 | 104166482 | 104167859 |
| chr5 | 104182890 | 104183765 |
| chr5 | 104247019 | 104247341 |
| chr5 | 104501331 | 104501579 |
| chr5 | 104864149 | 104864261 |
| chr5 | 104868288 | 104868548 |
| chr5 | 104869305 | 104869686 |
| chr5 | 104869693 | 104870048 |
| chr5 | 104888672 | 104889441 |
| chr5 | 105000773 | 105000874 |
| chr5 | 106010415 | 106010504 |
| chr5 | 106129464 | 106129991 |
| chr5 | 106176361 | 106176984 |
| chr5 | 107922536 | 107922781 |
| chr5 | 108064767 | 108065071 |
| chr5 | 108333317 | 108333730 |
| chr5 | 108334138 | 108334864 |
| chr5 | 108336362 | 108336545 |
| chr5 | 108494277 | 108495185 |
| chr5 | 108526359 | 108527793 |
| chr5 | 108658950 | 108659194 |
| chr5 | 108698088 | 108698574 |
| chr5 | 108746444 | 108746769 |
| chr5 | 109066344 | 109066649 |
| chr5 | 110600008 | 110600251 |
| chr5 | 110660083 | 110660414 |
| chr5 | 110715385 | 110715660 |
| chr5 | 110724075 | 110724701 |
| chr5 | 110734017 | 110734411 |
| chr5 | 110903076 | 110903243 |
| chr5 | 110920823 | 110920995 |
| chr5 | 111186128 | 111186237 |

|      |           |           |
|------|-----------|-----------|
| chr5 | 111281514 | 111281766 |
| chr5 | 111292788 | 111293099 |
| chr5 | 111335962 | 111336194 |
| chr5 | 111816542 | 111817291 |
| chr5 | 112705823 | 112706343 |
| chr5 | 112712486 | 112712893 |
| chr5 | 113473162 | 113473294 |
| chr5 | 113657260 | 113657452 |
| chr5 | 114550372 | 114550631 |
| chr5 | 114557223 | 114557351 |
| chr5 | 114830853 | 114831095 |
| chr5 | 114839227 | 114839361 |
| chr5 | 115050368 | 115050496 |
| chr5 | 115224989 | 115225268 |
| chr5 | 115225793 | 115225894 |
| chr5 | 115461127 | 115461667 |
| chr5 | 115485483 | 115486252 |
| chr5 | 115654579 | 115654804 |
| chr5 | 115737437 | 115737797 |
| chr5 | 115880013 | 115880612 |
| chr5 | 115903915 | 115904184 |
| chr5 | 115918601 | 115919344 |
| chr5 | 115939465 | 115939660 |
| chr5 | 115940260 | 115940462 |
| chr5 | 115957243 | 115957893 |
| chr5 | 115997908 | 115998378 |
| chr5 | 116033368 | 116034065 |
| chr5 | 116041005 | 116041618 |
| chr5 | 116043695 | 116044260 |
| chr5 | 116052155 | 116052980 |
| chr5 | 116295335 | 116295620 |
| chr5 | 116360361 | 116362388 |
| chr5 | 116373668 | 116374754 |
| chr5 | 116424765 | 116425082 |
| chr5 | 116436226 | 116436536 |
| chr5 | 117588440 | 117588869 |
| chr5 | 117723917 | 117724237 |
| chr5 | 117864369 | 117864474 |
| chr5 | 117864744 | 117864873 |
| chr5 | 118488439 | 118488754 |
| chr5 | 118620329 | 118620530 |
| chr5 | 118695534 | 118695861 |
| chr5 | 119010203 | 119011393 |

|      |           |           |
|------|-----------|-----------|
| chr5 | 119024816 | 119025428 |
| chr5 | 119078683 | 119079484 |
| chr5 | 119097971 | 119098446 |
| chr5 | 119108471 | 119109268 |
| chr5 | 119158102 | 119158577 |
| chr5 | 119181241 | 119181367 |
| chr5 | 119186864 | 119186953 |
| chr5 | 120120976 | 120121927 |
| chr5 | 120122014 | 120122493 |
| chr5 | 120130214 | 120131313 |
| chr5 | 120132537 | 120133703 |
| chr5 | 120589888 | 120590165 |
| chr5 | 121063118 | 121063265 |
| chr5 | 121654545 | 121655212 |
| chr5 | 121670259 | 121670438 |
| chr5 | 121848129 | 121848806 |
| chr5 | 122126988 | 122127112 |
| chr5 | 122161863 | 122163462 |
| chr5 | 122261236 | 122262523 |
| chr5 | 122303843 | 122304205 |
| chr5 | 122314601 | 122314691 |
| chr5 | 122325639 | 122325810 |
| chr5 | 122690866 | 122691096 |
| chr5 | 122734749 | 122735279 |
| chr5 | 122804460 | 122804668 |
| chr5 | 122872488 | 122872932 |
| chr5 | 123688484 | 123688607 |
| chr5 | 123823539 | 123823884 |
| chr5 | 123845685 | 123845949 |
| chr5 | 123895614 | 123896149 |
| chr5 | 124078208 | 124078320 |
| chr5 | 124218905 | 124219171 |
| chr5 | 124259257 | 124259663 |
| chr5 | 124269448 | 124269698 |
| chr5 | 124358762 | 124358892 |
| chr5 | 124388276 | 124388440 |
| chr5 | 124435158 | 124435476 |
| chr5 | 124725533 | 124725621 |
| chr5 | 124889979 | 124890687 |
| chr5 | 124895157 | 124896206 |
| chr5 | 124910780 | 124910888 |
| chr5 | 124954099 | 124954320 |
| chr5 | 124991039 | 124991617 |

|      |           |           |
|------|-----------|-----------|
| chr5 | 125034418 | 125034698 |
| chr5 | 125043996 | 125044306 |
| chr5 | 125343299 | 125344056 |
| chr5 | 125889839 | 125889963 |
| chr5 | 125921950 | 125922857 |
| chr5 | 127739846 | 127740056 |
| chr5 | 128180647 | 128180871 |
| chr5 | 129526108 | 129527000 |
| chr5 | 130007197 | 130008135 |
| chr5 | 130036351 | 130036620 |
| chr5 | 130061761 | 130062357 |
| chr5 | 130112162 | 130112907 |
| chr5 | 130231022 | 130231442 |
| chr5 | 130295413 | 130295753 |
| chr5 | 130300317 | 130300601 |
| chr5 | 130418177 | 130418845 |
| chr5 | 130436068 | 130436393 |
| chr5 | 130452828 | 130453522 |
| chr5 | 130698221 | 130698991 |
| chr5 | 130699767 | 130700136 |
| chr5 | 130710916 | 130711048 |
| chr5 | 130734583 | 130734677 |
| chr5 | 130734793 | 130734972 |
| chr5 | 131443504 | 131443646 |
| chr5 | 131511910 | 131512107 |
| chr5 | 131995601 | 131995694 |
| chr5 | 134680359 | 134680545 |
| chr5 | 135410970 | 135412037 |
| chr5 | 135515670 | 135516151 |
| chr5 | 135608156 | 135608830 |
| chr5 | 135608920 | 135609656 |
| chr5 | 135636629 | 135637960 |
| chr5 | 135663116 | 135663953 |
| chr5 | 135720627 | 135721152 |
| chr5 | 135846614 | 135846886 |
| chr5 | 136210807 | 136211191 |
| chr5 | 136254554 | 136254723 |
| chr5 | 136264820 | 136265175 |
| chr5 | 136466234 | 136466333 |
| chr5 | 136470805 | 136470986 |
| chr5 | 136677741 | 136677928 |
| chr5 | 137403709 | 137403798 |
| chr5 | 137463495 | 137463684 |

|      |           |           |
|------|-----------|-----------|
| chr5 | 137468927 | 137469273 |
| chr5 | 137472048 | 137472357 |
| chr5 | 137791268 | 137791913 |
| chr5 | 137951593 | 137951825 |
| chr5 | 137951966 | 137952688 |
| chr5 | 137968374 | 137969198 |
| chr5 | 138081234 | 138082266 |
| chr5 | 138188170 | 138188551 |
| chr5 | 138220255 | 138220713 |
| chr5 | 138542343 | 138542793 |
| chr5 | 138731789 | 138732695 |
| chr5 | 138740806 | 138741332 |
| chr5 | 138741413 | 138742161 |
| chr5 | 138749636 | 138750491 |
| chr5 | 138759189 | 138759577 |
| chr5 | 138765774 | 138766050 |
| chr5 | 138779809 | 138779976 |
| chr5 | 138786092 | 138786586 |
| chr5 | 138890668 | 138890932 |
| chr5 | 138893962 | 138894067 |
| chr5 | 138894700 | 138894988 |
| chr5 | 139676617 | 139677122 |
| chr5 | 139696079 | 139696695 |
| chr5 | 139697008 | 139697261 |
| chr5 | 139716804 | 139717564 |
| chr5 | 139919572 | 139919685 |
| chr5 | 140320882 | 140321161 |
| chr5 | 143590140 | 143590308 |
| chr5 | 143723374 | 143724647 |
| chr5 | 143733706 | 143734458 |
| chr5 | 143734501 | 143734819 |
| chr5 | 144165496 | 144165853 |
| chr5 | 144182224 | 144182885 |
| chr5 | 144383561 | 144383938 |
| chr5 | 144386857 | 144387304 |
| chr5 | 144408015 | 144408240 |
| chr5 | 144861312 | 144861935 |
| chr5 | 144936024 | 144936347 |
| chr5 | 144945699 | 144946645 |
| chr5 | 144947908 | 144948722 |
| chr5 | 145306767 | 145306902 |
| chr5 | 145458114 | 145458708 |
| chr5 | 145532200 | 145532438 |

|      |           |           |
|------|-----------|-----------|
| chr5 | 145551629 | 145552082 |
| chr5 | 145563918 | 145564655 |
| chr5 | 145580217 | 145580561 |
| chr5 | 145614843 | 145615311 |
| chr5 | 145994474 | 145994870 |
| chr5 | 145996074 | 145996627 |
| chr5 | 147042767 | 147042990 |
| chr5 | 147043071 | 147043415 |
| chr5 | 147099736 | 147100257 |
| chr5 | 147196850 | 147197186 |
| chr5 | 147276580 | 147277010 |
| chr5 | 147279819 | 147280126 |
| chr5 | 147646346 | 147646550 |
| chr5 | 147646664 | 147647011 |
| chr5 | 147760728 | 147761024 |
| chr5 | 147889116 | 147889348 |
| chr5 | 148241794 | 148242700 |
| chr5 | 148278879 | 148279129 |
| chr5 | 148296951 | 148297254 |
| chr5 | 149998155 | 149998469 |
| chr5 | 150480843 | 150481491 |
| chr5 | 151065652 | 151065956 |
| chr5 | 151328243 | 151328606 |
| chr5 | 151358399 | 151358693 |
| chr5 | 151476415 | 151476928 |
| chr5 | 151518029 | 151518134 |
| chr5 | 151534608 | 151534891 |
| chr5 | 152196871 | 152197090 |
| chr6 | 3470912   | 3471120   |
| chr6 | 3498370   | 3498804   |
| chr6 | 4485980   | 4486122   |
| chr6 | 4487844   | 4488087   |
| chr6 | 4490616   | 4491175   |
| chr6 | 4551056   | 4551187   |
| chr6 | 4697365   | 4697607   |
| chr6 | 4887691   | 4887929   |
| chr6 | 5111107   | 5111279   |
| chr6 | 6906245   | 6906514   |
| chr6 | 7794865   | 7795451   |
| chr6 | 8460039   | 8460350   |
| chr6 | 10050370  | 10050488  |
| chr6 | 11910353  | 11910446  |
| chr6 | 13019862  | 13020086  |



|      |          |          |
|------|----------|----------|
| chr6 | 13499505 | 13499637 |
| chr6 | 13815788 | 13816157 |
| chr6 | 17386305 | 17386445 |
| chr6 | 17413857 | 17414101 |
| chr6 | 17587056 | 17587637 |
| chr6 | 23469745 | 23469843 |
| chr6 | 28373606 | 28373863 |
| chr6 | 28373918 | 28374168 |
| chr6 | 28376492 | 28376601 |
| chr6 | 28430406 | 28430974 |
| chr6 | 28528425 | 28528821 |
| chr6 | 28695633 | 28695855 |
| chr6 | 28745921 | 28746776 |
| chr6 | 28782066 | 28783089 |
| chr6 | 29298149 | 29298504 |
| chr6 | 29324415 | 29325338 |
| chr6 | 29325392 | 29326612 |
| chr6 | 29338817 | 29338939 |
| chr6 | 29685559 | 29686224 |
| chr6 | 29702414 | 29702699 |
| chr6 | 29760223 | 29760518 |
| chr6 | 29998041 | 29999186 |
| chr6 | 30052362 | 30052741 |
| chr6 | 30070210 | 30070435 |
| chr6 | 30093271 | 30093354 |
| chr6 | 30329133 | 30329230 |
| chr6 | 30373079 | 30373839 |
| chr6 | 30754862 | 30755051 |
| chr6 | 31453074 | 31453338 |
| chr6 | 33201199 | 33201431 |
| chr6 | 33242933 | 33243617 |
| chr6 | 33261347 | 33261649 |
| chr6 | 33292340 | 33292712 |
| chr6 | 33302046 | 33302457 |
| chr6 | 33303900 | 33304182 |
| chr6 | 33309966 | 33311087 |
| chr6 | 33318784 | 33319760 |
| chr6 | 33320176 | 33321152 |
| chr6 | 33332987 | 33333387 |
| chr6 | 33350953 | 33351919 |
| chr6 | 33352120 | 33352989 |
| chr6 | 33370912 | 33371698 |
| chr6 | 33383309 | 33383652 |

|      |          |          |
|------|----------|----------|
| chr6 | 33392827 | 33393054 |
| chr6 | 33396636 | 33397706 |
| chr6 | 33412501 | 33413938 |
| chr6 | 33425394 | 33425530 |
| chr6 | 33427192 | 33427532 |
| chr6 | 33439625 | 33440301 |
| chr6 | 33465382 | 33465839 |
| chr6 | 33505175 | 33505669 |
| chr6 | 33511146 | 33511573 |
| chr6 | 33512914 | 33513112 |
| chr6 | 33538613 | 33539541 |
| chr6 | 33544993 | 33547393 |
| chr6 | 33555968 | 33556755 |
| chr6 | 33568694 | 33569069 |
| chr6 | 33576621 | 33576917 |
| chr6 | 33581618 | 33582299 |
| chr6 | 33582758 | 33583015 |
| chr6 | 33585805 | 33585973 |
| chr6 | 33623046 | 33623188 |
| chr6 | 33633077 | 33633952 |
| chr6 | 33663984 | 33664859 |
| chr6 | 33675305 | 33675402 |
| chr6 | 33713893 | 33714166 |
| chr6 | 33843539 | 33843787 |
| chr6 | 33893880 | 33894009 |
| chr6 | 34640413 | 34640676 |
| chr6 | 35188183 | 35188400 |
| chr6 | 35211246 | 35211548 |
| chr6 | 37756009 | 37756222 |
| chr6 | 37820779 | 37821702 |
| chr6 | 37871660 | 37872137 |
| chr6 | 37898913 | 37899360 |
| chr6 | 38384585 | 38384844 |
| chr6 | 38483925 | 38484057 |
| chr6 | 38501460 | 38502605 |
| chr6 | 38508015 | 38508933 |
| chr6 | 38545934 | 38546159 |
| chr6 | 38553939 | 38554627 |
| chr6 | 38558966 | 38559219 |
| chr6 | 39156820 | 39157022 |
| chr6 | 40421479 | 40421726 |
| chr6 | 42214955 | 42215296 |
| chr6 | 42231583 | 42232096 |

|      |          |          |
|------|----------|----------|
| chr6 | 43286248 | 43286387 |
| chr6 | 44167074 | 44167440 |
| chr6 | 47404656 | 47405215 |
| chr6 | 47545218 | 47545666 |
| chr6 | 47731621 | 47731774 |
| chr6 | 47855299 | 47855638 |
| chr6 | 48239224 | 48239336 |
| chr6 | 48576742 | 48577066 |
| chr6 | 50060581 | 50060884 |
| chr6 | 50516768 | 50517164 |
| chr6 | 51479247 | 51479349 |
| chr6 | 51634669 | 51634752 |
| chr6 | 52054264 | 52054425 |
| chr6 | 53383966 | 53384164 |
| chr6 | 54175017 | 54175427 |
| chr6 | 54767057 | 54767590 |
| chr6 | 54803302 | 54803682 |
| chr6 | 54834066 | 54834281 |
| chr6 | 54987998 | 54988506 |
| chr6 | 56782095 | 56782393 |
| chr6 | 56819156 | 56819441 |
| chr6 | 56828642 | 56829302 |
| chr6 | 58563332 | 58563481 |
| chr6 | 58610276 | 58610523 |
| chr6 | 58626545 | 58626687 |
| chr6 | 58634949 | 58635069 |
| chr6 | 60200810 | 60200931 |
| chr6 | 61130652 | 61130882 |
| chr6 | 64992697 | 64993164 |
| chr6 | 65013903 | 65014512 |
| chr6 | 65017659 | 65017861 |
| chr6 | 65757802 | 65758004 |
| chr6 | 65848740 | 65848928 |
| chr6 | 65858456 | 65858716 |
| chr6 | 66491069 | 66491271 |
| chr6 | 66739651 | 66739743 |
| chr6 | 66846771 | 66846970 |
| chr6 | 66894883 | 66895243 |
| chr6 | 67003239 | 67003508 |
| chr6 | 67217313 | 67218048 |
| chr6 | 67218051 | 67218349 |
| chr6 | 67259353 | 67259593 |
| chr6 | 69466334 | 69466585 |

|      |          |          |
|------|----------|----------|
| chr6 | 70805434 | 70805601 |
| chr6 | 71227617 | 71227760 |
| chr6 | 71444307 | 71444532 |
| chr6 | 71493963 | 71494543 |
| chr6 | 71781646 | 71781860 |
| chr6 | 72756955 | 72757081 |
| chr6 | 72850440 | 72850624 |
| chr6 | 73206712 | 73206818 |
| chr6 | 76582642 | 76582734 |
| chr6 | 81588303 | 81588509 |
| chr6 | 83004872 | 83005492 |
| chr6 | 83065544 | 83066000 |
| chr6 | 83067350 | 83067675 |
| chr6 | 83067734 | 83068132 |
| chr6 | 83138903 | 83139261 |
| chr6 | 83276035 | 83276257 |
| chr6 | 83292155 | 83292698 |
| chr6 | 83864418 | 83865358 |
| chr6 | 83902206 | 83902559 |
| chr6 | 83908866 | 83908954 |
| chr6 | 83909240 | 83909338 |
| chr6 | 83939010 | 83939190 |
| chr6 | 84040536 | 84040631 |
| chr6 | 85056918 | 85057561 |
| chr6 | 85417424 | 85417996 |
| chr6 | 85418105 | 85418348 |
| chr6 | 85537885 | 85538023 |
| chr6 | 85585857 | 85586419 |
| chr6 | 86353885 | 86354010 |
| chr6 | 86415511 | 86415633 |
| chr6 | 86476543 | 86476863 |
| chr6 | 86545372 | 86545598 |
| chr6 | 86888901 | 86889652 |
| chr6 | 86972370 | 86972552 |
| chr6 | 87040458 | 87040829 |
| chr6 | 87930789 | 87931128 |
| chr6 | 88034489 | 88034903 |
| chr6 | 88726930 | 88727422 |
| chr6 | 89713878 | 89713963 |
| chr6 | 90769232 | 90769315 |
| chr6 | 91214652 | 91214926 |
| chr6 | 91423739 | 91424287 |
| chr6 | 91634071 | 91634657 |

|      |           |           |
|------|-----------|-----------|
| chr6 | 91663277  | 91663607  |
| chr6 | 91707394  | 91708537  |
| chr6 | 91851376  | 91851473  |
| chr6 | 91975962  | 91976244  |
| chr6 | 91989289  | 91989726  |
| chr6 | 92041835  | 92042724  |
| chr6 | 92118148  | 92118436  |
| chr6 | 94530163  | 94530587  |
| chr6 | 94537928  | 94538048  |
| chr6 | 96542977  | 96543066  |
| chr6 | 97172297  | 97172583  |
| chr6 | 97680430  | 97680564  |
| chr6 | 98624664  | 98624754  |
| chr6 | 100783884 | 100784499 |
| chr6 | 102298533 | 102298617 |
| chr6 | 102647068 | 102647154 |
| chr6 | 106951444 | 106951583 |
| chr6 | 108163121 | 108163387 |
| chr6 | 108176151 | 108176490 |
| chr6 | 108210283 | 108210661 |
| chr6 | 108224068 | 108224887 |
| chr6 | 108259814 | 108260746 |
| chr6 | 108321071 | 108321608 |
| chr6 | 108322627 | 108323137 |
| chr6 | 108338283 | 108338808 |
| chr6 | 108343811 | 108344143 |
| chr6 | 108365157 | 108365463 |
| chr6 | 108386484 | 108387085 |
| chr6 | 108485765 | 108485919 |
| chr6 | 108733097 | 108733766 |
| chr6 | 108778443 | 108778822 |
| chr6 | 108778945 | 108779369 |
| chr6 | 108789111 | 108789297 |
| chr6 | 108805794 | 108806099 |
| chr6 | 108807273 | 108807629 |
| chr6 | 112555250 | 112555477 |
| chr6 | 113027218 | 113029331 |
| chr6 | 113054934 | 113055195 |
| chr6 | 113262167 | 113262327 |
| chr6 | 113271798 | 113272072 |
| chr6 | 113274322 | 113274612 |
| chr6 | 113294571 | 113294692 |
| chr6 | 113349476 | 113350264 |

|      |           |           |
|------|-----------|-----------|
| chr6 | 113433513 | 113434059 |
| chr6 | 113535405 | 113536284 |
| chr6 | 113554806 | 113555470 |
| chr6 | 113647752 | 113648105 |
| chr6 | 113668668 | 113669493 |
| chr6 | 114600840 | 114601156 |
| chr6 | 114688325 | 114688553 |
| chr6 | 114953060 | 114953155 |
| chr6 | 115499212 | 115500110 |
| chr6 | 115505983 | 115506754 |
| chr6 | 115632567 | 115632651 |
| chr6 | 116288066 | 116288313 |
| chr6 | 117856787 | 117858814 |
| chr6 | 117866555 | 117867695 |
| chr6 | 117900457 | 117900665 |
| chr6 | 119429532 | 119430338 |
| chr6 | 119798361 | 119798583 |
| chr6 | 119852740 | 119853059 |
| chr6 | 120314420 | 120314974 |
| chr6 | 120616665 | 120617427 |
| chr6 | 120700055 | 120700183 |
| chr6 | 120732165 | 120732437 |
| chr6 | 120786450 | 120786696 |
| chr6 | 121144084 | 121144433 |
| chr6 | 121596809 | 121597057 |
| chr6 | 121619969 | 121620069 |
| chr6 | 122258722 | 122259344 |
| chr6 | 122266351 | 122266706 |
| chr6 | 122266942 | 122267594 |
| chr6 | 122657504 | 122658158 |
| chr6 | 122663859 | 122664709 |
| chr6 | 122824838 | 122825091 |
| chr6 | 124426253 | 124426931 |
| chr6 | 124615332 | 124615910 |
| chr6 | 124664639 | 124665846 |
| chr6 | 124781912 | 124782440 |
| chr6 | 124816352 | 124816565 |
| chr6 | 124885168 | 124886056 |
| chr6 | 124915629 | 124915789 |
| chr6 | 124951966 | 124952491 |
| chr6 | 124959187 | 124959550 |
| chr6 | 124975806 | 124976157 |
| chr6 | 125046176 | 125046441 |

|      |           |           |
|------|-----------|-----------|
| chr6 | 125047019 | 125047313 |
| chr6 | 125071546 | 125072333 |
| chr6 | 125079740 | 125080627 |
| chr6 | 125102176 | 125102801 |
| chr6 | 125103074 | 125103560 |
| chr6 | 125171225 | 125172103 |
| chr6 | 125183774 | 125184321 |
| chr6 | 125311287 | 125311501 |
| chr6 | 125543575 | 125543714 |
| chr6 | 128312997 | 128313372 |
| chr6 | 128323226 | 128323997 |
| chr6 | 128400152 | 128400363 |
| chr6 | 128779079 | 128779169 |
| chr6 | 128788466 | 128788591 |
| chr6 | 128789064 | 128789213 |
| chr6 | 129483253 | 129483490 |
| chr6 | 132515033 | 132515128 |
| chr6 | 135033880 | 135034183 |
| chr6 | 135034227 | 135034687 |
| chr6 | 135331089 | 135331647 |
| chr6 | 136489968 | 136490458 |
| chr6 | 136535475 | 136536053 |
| chr6 | 136756834 | 136757207 |
| chr6 | 136757256 | 136757971 |
| chr6 | 137683661 | 137683961 |
| chr6 | 137691119 | 137691483 |
| chr6 | 137735029 | 137735269 |
| chr6 | 137746115 | 137746310 |
| chr6 | 140372407 | 140372676 |
| chr6 | 140392467 | 140393017 |
| chr6 | 140400742 | 140401725 |
| chr6 | 140410358 | 140410849 |
| chr6 | 140448771 | 140449298 |
| chr6 | 140571989 | 140573577 |
| chr6 | 142301389 | 142301488 |
| chr6 | 142335682 | 142336207 |
| chr6 | 143115753 | 143116531 |
| chr6 | 143139195 | 143140653 |
| chr6 | 143154227 | 143154996 |
| chr6 | 143155003 | 143156099 |
| chr6 | 146591165 | 146591629 |
| chr6 | 146851621 | 146851721 |
| chr6 | 146924583 | 146924778 |

|      |           |           |
|------|-----------|-----------|
| chr6 | 147010269 | 147010505 |
| chr6 | 147028746 | 147029135 |
| chr6 | 147040124 | 147040860 |
| chr6 | 148303185 | 148303570 |
| chr6 | 148303710 | 148304226 |
| chr6 | 149257953 | 149258185 |
| chr6 | 149259590 | 149260118 |
| chr6 | 149384912 | 149385163 |
| chr7 | 3217854   | 3219969   |
| chr7 | 3220060   | 3220908   |
| chr7 | 3297393   | 3298841   |
| chr7 | 3314196   | 3314330   |
| chr7 | 3318713   | 3318923   |
| chr7 | 3596880   | 3597760   |
| chr7 | 3597822   | 3598856   |
| chr7 | 3655909   | 3656678   |
| chr7 | 4083507   | 4083739   |
| chr7 | 4088870   | 4089385   |
| chr7 | 4096740   | 4099829   |
| chr7 | 4691741   | 4693618   |
| chr7 | 4697587   | 4698601   |
| chr7 | 4744575   | 4745348   |
| chr7 | 4828930   | 4829441   |
| chr7 | 4870821   | 4871744   |
| chr7 | 4877380   | 4877585   |
| chr7 | 4972174   | 4972781   |
| chr7 | 5013593   | 5014278   |
| chr7 | 5019694   | 5020387   |
| chr7 | 5044430   | 5045000   |
| chr7 | 5048172   | 5049064   |
| chr7 | 6124140   | 6124474   |
| chr7 | 6141414   | 6142098   |
| chr7 | 6937845   | 6938085   |
| chr7 | 7136373   | 7136598   |
| chr7 | 7230729   | 7231220   |
| chr7 | 13493079  | 13493502  |
| chr7 | 13508253  | 13508548  |
| chr7 | 13516143  | 13516248  |
| chr7 | 13563342  | 13563766  |
| chr7 | 13609534  | 13610633  |
| chr7 | 13612912  | 13616064  |
| chr7 | 13616093  | 13616440  |
| chr7 | 16280582  | 16280679  |



|      |          |          |
|------|----------|----------|
| chr7 | 16689567 | 16689942 |
| chr7 | 16715248 | 16715360 |
| chr7 | 16744598 | 16744758 |
| chr7 | 16895485 | 16895891 |
| chr7 | 16897057 | 16897457 |
| chr7 | 16902509 | 16903069 |
| chr7 | 16903304 | 16903577 |
| chr7 | 16985773 | 16987410 |
| chr7 | 16997695 | 16997996 |
| chr7 | 17046601 | 17046725 |
| chr7 | 17057161 | 17057300 |
| chr7 | 17356574 | 17356733 |
| chr7 | 17357453 | 17357543 |
| chr7 | 17366721 | 17367774 |
| chr7 | 17374244 | 17374355 |
| chr7 | 17383230 | 17383621 |
| chr7 | 17416446 | 17417409 |
| chr7 | 17460704 | 17460962 |
| chr7 | 19510808 | 19511066 |
| chr7 | 19589957 | 19590437 |
| chr7 | 19635884 | 19636293 |
| chr7 | 19636395 | 19637851 |
| chr7 | 19661603 | 19662420 |
| chr7 | 19677250 | 19677616 |
| chr7 | 19827477 | 19827567 |
| chr7 | 19846207 | 19846435 |
| chr7 | 19886586 | 19886733 |
| chr7 | 19932061 | 19932344 |
| chr7 | 20162942 | 20163242 |
| chr7 | 20408059 | 20408415 |
| chr7 | 20430008 | 20430719 |
| chr7 | 20559733 | 20560001 |
| chr7 | 24566397 | 24566494 |
| chr7 | 24872871 | 24873085 |
| chr7 | 25193445 | 25193856 |
| chr7 | 25267048 | 25267723 |
| chr7 | 25267891 | 25268292 |
| chr7 | 25288894 | 25289489 |
| chr7 | 25352327 | 25352801 |
| chr7 | 25669656 | 25670321 |
| chr7 | 25670805 | 25671643 |
| chr7 | 25692119 | 25692593 |
| chr7 | 25702974 | 25703451 |

|      |          |          |
|------|----------|----------|
| chr7 | 25703788 | 25704717 |
| chr7 | 25992672 | 25992758 |
| chr7 | 26063819 | 26064938 |
| chr7 | 26066821 | 26068003 |
| chr7 | 26072807 | 26074626 |
| chr7 | 26125723 | 26126229 |
| chr7 | 26149049 | 26149597 |
| chr7 | 26183343 | 26183622 |
| chr7 | 26246546 | 26246713 |
| chr7 | 26272965 | 26273341 |
| chr7 | 26452316 | 26453123 |
| chr7 | 28044410 | 28044871 |
| chr7 | 28338325 | 28338561 |
| chr7 | 28365721 | 28366597 |
| chr7 | 28376709 | 28377468 |
| chr7 | 28642309 | 28642439 |
| chr7 | 28954844 | 28955382 |
| chr7 | 28964882 | 28965540 |
| chr7 | 28971570 | 28972173 |
| chr7 | 28978925 | 28979986 |
| chr7 | 28981534 | 28982089 |
| chr7 | 29136429 | 29136707 |
| chr7 | 29158029 | 29158166 |
| chr7 | 29552169 | 29552515 |
| chr7 | 29595959 | 29596671 |
| chr7 | 29600119 | 29602350 |
| chr7 | 29602787 | 29603068 |
| chr7 | 30650484 | 30650715 |
| chr7 | 30812766 | 30813044 |
| chr7 | 30980008 | 30980247 |
| chr7 | 31102733 | 31103024 |
| chr7 | 31263900 | 31264200 |
| chr7 | 31535909 | 31536609 |
| chr7 | 32016877 | 32016970 |
| chr7 | 35068329 | 35068428 |
| chr7 | 35757156 | 35757457 |
| chr7 | 35779425 | 35779788 |
| chr7 | 36371394 | 36371618 |
| chr7 | 48863259 | 48863641 |
| chr7 | 50338206 | 50338449 |
| chr7 | 50341829 | 50341934 |
| chr7 | 50720712 | 50720835 |
| chr7 | 51503366 | 51503646 |

|      |          |          |
|------|----------|----------|
| chr7 | 51505218 | 51505365 |
| chr7 | 51505497 | 51506114 |
| chr7 | 51724548 | 51724983 |
| chr7 | 52071766 | 52072361 |
| chr7 | 52074097 | 52075640 |
| chr7 | 52082822 | 52085181 |
| chr7 | 52155649 | 52155785 |
| chr7 | 52255818 | 52256145 |
| chr7 | 52273350 | 52273469 |
| chr7 | 52276838 | 52277002 |
| chr7 | 52515383 | 52515723 |
| chr7 | 52814492 | 52814872 |
| chr7 | 52975162 | 52975512 |
| chr7 | 53049343 | 53049906 |
| chr7 | 53128196 | 53128441 |
| chr7 | 53138369 | 53138602 |
| chr7 | 53543248 | 53543681 |
| chr7 | 53705784 | 53705919 |
| chr7 | 54055042 | 54055202 |
| chr7 | 54110526 | 54110881 |
| chr7 | 54669239 | 54669336 |
| chr7 | 57054382 | 57054730 |
| chr7 | 57057335 | 57057428 |
| chr7 | 59243427 | 59243619 |
| chr7 | 60182463 | 60182572 |
| chr7 | 63075565 | 63075751 |
| chr7 | 63097927 | 63098084 |
| chr7 | 63152777 | 63152974 |
| chr7 | 63306036 | 63306263 |
| chr7 | 63319769 | 63319983 |
| chr7 | 63341014 | 63341121 |
| chr7 | 64900892 | 64901109 |
| chr7 | 65654677 | 65654807 |
| chr7 | 66484146 | 66485050 |
| chr7 | 66516811 | 66517058 |
| chr7 | 66523056 | 66523389 |
| chr7 | 69679474 | 69679579 |
| chr7 | 71463972 | 71464151 |
| chr7 | 71702403 | 71702587 |
| chr7 | 73007136 | 73007789 |
| chr7 | 73060608 | 73060832 |
| chr7 | 73254408 | 73255169 |
| chr7 | 73861619 | 73861848 |

|      |          |          |
|------|----------|----------|
| chr7 | 75096773 | 75097783 |
| chr7 | 75240881 | 75241210 |
| chr7 | 79798972 | 79799205 |
| chr7 | 80885636 | 80885862 |
| chr7 | 82600446 | 82600896 |
| chr7 | 86042252 | 86042973 |
| chr7 | 86043119 | 86043605 |
| chr7 | 86418148 | 86418347 |
| chr7 | 86430389 | 86430800 |
| chr7 | 86509470 | 86510182 |
| chr7 | 86577306 | 86577760 |
| chr7 | 86611304 | 86611434 |
| chr7 | 86805878 | 86806502 |
| chr7 | 86831563 | 86831669 |
| chr7 | 86957417 | 86957647 |
| chr7 | 87169738 | 87170419 |
| chr7 | 87170981 | 87171687 |
| chr7 | 87171860 | 87173643 |
| chr7 | 87179250 | 87181281 |
| chr7 | 87189092 | 87190112 |
| chr7 | 87214659 | 87215143 |
| chr7 | 87235697 | 87236250 |
| chr7 | 87424942 | 87425346 |
| chr7 | 88138722 | 88138888 |
| chr7 | 88224657 | 88225083 |
| chr7 | 88301660 | 88301878 |
| chr7 | 88380297 | 88380641 |
| chr7 | 88448844 | 88449642 |
| chr7 | 88669221 | 88669379 |
| chr7 | 88674647 | 88674972 |
| chr7 | 89319727 | 89320616 |
| chr7 | 89368696 | 89368988 |
| chr7 | 89412933 | 89413290 |
| chr7 | 89834940 | 89835066 |
| chr7 | 89843112 | 89843415 |
| chr7 | 89875634 | 89875767 |
| chr7 | 89892027 | 89892262 |
| chr7 | 89919526 | 89920600 |
| chr7 | 89964369 | 89964526 |
| chr7 | 90904545 | 90904819 |
| chr7 | 91040757 | 91040872 |
| chr7 | 94428730 | 94429040 |
| chr7 | 97278774 | 97279661 |

|      |           |           |
|------|-----------|-----------|
| chr7 | 97295585  | 97295922  |
| chr7 | 97590478  | 97590575  |
| chr7 | 97591302  | 97591644  |
| chr7 | 97591820  | 97592449  |
| chr7 | 99891786  | 99892315  |
| chr7 | 100023813 | 100024224 |
| chr7 | 103359150 | 103359441 |
| chr7 | 103361198 | 103362076 |
| chr7 | 103403330 | 103403684 |
| chr7 | 104110249 | 104110505 |
| chr7 | 104728413 | 104729322 |
| chr7 | 104740401 | 104740902 |
| chr7 | 104796177 | 104796495 |
| chr7 | 104937552 | 104937691 |
| chr7 | 104951571 | 104951788 |
| chr7 | 104973737 | 104973839 |
| chr7 | 105241577 | 105241695 |
| chr7 | 105963920 | 105964049 |
| chr7 | 106591461 | 106591590 |
| chr7 | 106646237 | 106646374 |
| chr7 | 107756393 | 107756910 |
| chr7 | 107756933 | 107757414 |
| chr7 | 107961682 | 107962052 |
| chr7 | 107967066 | 107967164 |
| chr7 | 107984675 | 107984971 |
| chr7 | 108147712 | 108147803 |
| chr7 | 108257028 | 108257261 |
| chr7 | 108875365 | 108875987 |
| chr7 | 108889710 | 108890076 |
| chr7 | 109055126 | 109055427 |
| chr7 | 109085927 | 109086566 |
| chr7 | 109118224 | 109118989 |
| chr7 | 109159295 | 109159640 |
| chr7 | 109225753 | 109226050 |
| chr7 | 109416282 | 109416831 |
| chr7 | 109509635 | 109510105 |
| chr7 | 109577560 | 109577789 |
| chr7 | 109620815 | 109621114 |
| chr7 | 110420077 | 110420350 |
| chr7 | 111571786 | 111571924 |
| chr7 | 114353056 | 114353828 |
| chr7 | 114387684 | 114387931 |
| chr7 | 114392138 | 114392666 |

|      |           |           |
|------|-----------|-----------|
| chr7 | 114416174 | 114416280 |
| chr7 | 114514368 | 114515434 |
| chr7 | 114603434 | 114603778 |
| chr7 | 114656811 | 114656956 |
| chr7 | 114835568 | 114835978 |
| chr7 | 116077906 | 116078293 |
| chr7 | 116662713 | 116663163 |
| chr7 | 116663312 | 116663950 |
| chr7 | 116664731 | 116665116 |
| chr7 | 117161834 | 117162814 |
| chr7 | 117166602 | 117166906 |
| chr7 | 117173247 | 117173421 |
| chr7 | 117189734 | 117190214 |
| chr7 | 117199198 | 117199415 |
| chr7 | 117265530 | 117265964 |
| chr7 | 117265988 | 117266388 |
| chr7 | 118174879 | 118175077 |
| chr7 | 119167156 | 119167418 |
| chr7 | 119822871 | 119823971 |
| chr7 | 119828613 | 119829363 |
| chr7 | 119834927 | 119837036 |
| chr7 | 119854284 | 119856490 |
| chr7 | 119903874 | 119905101 |
| chr7 | 119923106 | 119924614 |
| chr7 | 119934302 | 119934519 |
| chr7 | 119998816 | 119999389 |
| chr7 | 120011659 | 120012411 |
| chr7 | 120020306 | 120021063 |
| chr7 | 120046186 | 120046850 |
| chr7 | 120194723 | 120195149 |
| chr7 | 120196501 | 120196744 |
| chr7 | 121558886 | 121559201 |
| chr7 | 121559432 | 121559702 |
| chr7 | 123595927 | 123596016 |
| chr7 | 124525476 | 124525806 |
| chr7 | 124545510 | 124545709 |
| chr7 | 125887146 | 125887366 |
| chr7 | 125905000 | 125905491 |
| chr7 | 125929233 | 125929534 |
| chr7 | 126026674 | 126026827 |
| chr7 | 126978630 | 126978905 |
| chr7 | 127584744 | 127585117 |
| chr7 | 127595070 | 127595417 |

|      |           |           |
|------|-----------|-----------|
| chr7 | 127602281 | 127602467 |
| chr7 | 127821103 | 127821513 |
| chr7 | 127836002 | 127836164 |
| chr7 | 128061025 | 128061158 |
| chr7 | 129222720 | 129223779 |
| chr7 | 129472160 | 129472591 |
| chr7 | 130113457 | 130114421 |
| chr7 | 130125882 | 130126099 |
| chr7 | 130140467 | 130140840 |
| chr7 | 130267665 | 130268108 |
| chr7 | 130294965 | 130295053 |
| chr7 | 130514338 | 130514714 |
| chr7 | 130996516 | 130997234 |
| chr7 | 131126502 | 131127029 |
| chr7 | 131142994 | 131143281 |
| chr7 | 131204814 | 131204970 |
| chr7 | 132219772 | 132219904 |
| chr7 | 132888433 | 132888676 |
| chr7 | 133416097 | 133417030 |
| chr7 | 133632197 | 133632374 |
| chr7 | 133646153 | 133646471 |
| chr7 | 133646534 | 133647181 |
| chr7 | 133967448 | 133967697 |
| chr7 | 134088331 | 134088886 |
| chr7 | 134223015 | 134223129 |
| chr7 | 134342143 | 134342446 |
| chr7 | 134379804 | 134380475 |
| chr7 | 134615558 | 134615867 |
| chr7 | 134628059 | 134628430 |
| chr7 | 134655575 | 134656352 |
| chr7 | 134663088 | 134663384 |
| chr7 | 134671385 | 134671565 |
| chr7 | 134685113 | 134685880 |
| chr7 | 134701771 | 134702929 |
| chr7 | 134721126 | 134721560 |
| chr7 | 134890015 | 134891026 |
| chr7 | 134911262 | 134912566 |
| chr7 | 134920545 | 134921504 |
| chr7 | 134928355 | 134930245 |
| chr7 | 134946288 | 134946571 |
| chr7 | 135051950 | 135052193 |
| chr7 | 135056823 | 135057032 |
| chr7 | 135111003 | 135112166 |

|      |           |           |
|------|-----------|-----------|
| chr7 | 135116084 | 135116412 |
| chr7 | 135125267 | 135125604 |
| chr7 | 135150456 | 135150630 |
| chr7 | 135927384 | 135927531 |
| chr7 | 137789519 | 137790027 |
| chr7 | 137801332 | 137801743 |
| chr7 | 137878689 | 137879218 |
| chr7 | 137897703 | 137897897 |
| chr7 | 138036088 | 138036470 |
| chr7 | 138036484 | 138036713 |
| chr7 | 138038922 | 138039900 |
| chr7 | 138054480 | 138054786 |
| chr7 | 139847229 | 139847605 |
| chr7 | 140122907 | 140123723 |
| chr7 | 141862563 | 141863007 |
| chr7 | 141874531 | 141874967 |
| chr7 | 142081667 | 142082523 |
| chr7 | 142110135 | 142110498 |
| chr7 | 142280803 | 142280926 |
| chr7 | 144086322 | 144087065 |
| chr7 | 144091853 | 144092360 |
| chr7 | 144126053 | 144127078 |
| chr7 | 144177123 | 144177258 |
| chr7 | 144201307 | 144201851 |
| chr7 | 144251822 | 144252147 |
| chr7 | 144629352 | 144630171 |
| chr7 | 144647578 | 144648143 |
| chr7 | 146038300 | 146038881 |
| chr7 | 146063824 | 146064180 |
| chr7 | 146073534 | 146073766 |
| chr7 | 146648458 | 146648955 |
| chr7 | 147107109 | 147107306 |
| chr7 | 147129801 | 147130725 |
| chr7 | 147130738 | 147131015 |
| chr7 | 148043289 | 148043803 |
| chr7 | 148127656 | 148127957 |
| chr7 | 148141830 | 148142004 |
| chr7 | 148246884 | 148247341 |
| chr7 | 148253775 | 148254539 |
| chr7 | 148322016 | 148322316 |
| chr7 | 148340663 | 148341574 |
| chr7 | 148633547 | 148633883 |
| chr7 | 148634553 | 148635031 |



|      |           |           |
|------|-----------|-----------|
| chr7 | 148656390 | 148656813 |
| chr7 | 148750283 | 148750610 |
| chr7 | 148800822 | 148801654 |
| chr7 | 148818405 | 148819003 |
| chr7 | 149719214 | 149719600 |
| chr7 | 150238659 | 150241387 |
| chr7 | 150253220 | 150253839 |
| chr7 | 150324903 | 150325071 |
| chr7 | 150339939 | 150340227 |
| chr7 | 150669999 | 150670105 |
| chr7 | 151033736 | 151034305 |
| chr7 | 152047315 | 152050245 |
| chr7 | 152050333 | 152051258 |
| chr7 | 152173230 | 152173627 |
| chr8 | 3513618   | 3514839   |
| chr8 | 3531714   | 3532072   |
| chr8 | 3537425   | 3538067   |
| chr8 | 3540922   | 3541533   |
| chr8 | 3543945   | 3544211   |
| chr8 | 3604348   | 3605086   |
| chr8 | 4239019   | 4240146   |
| chr8 | 4245826   | 4246680   |
| chr8 | 4328643   | 4329462   |
| chr8 | 4512128   | 4512331   |
| chr8 | 5640030   | 5640315   |
| chr8 | 11346347  | 11346574  |
| chr8 | 11392022  | 11392555  |
| chr8 | 11448246  | 11448912  |
| chr8 | 11449065  | 11449289  |
| chr8 | 11497609  | 11497943  |
| chr8 | 11510784  | 11510882  |
| chr8 | 11511514  | 11511806  |
| chr8 | 11556479  | 11557025  |
| chr8 | 11728442  | 11728732  |
| chr8 | 11758420  | 11759023  |
| chr8 | 11817536  | 11817913  |
| chr8 | 11833828  | 11834636  |
| chr8 | 12666688  | 12666805  |
| chr8 | 12757257  | 12757667  |
| chr8 | 12782859  | 12783307  |
| chr8 | 13131305  | 13131498  |
| chr8 | 13159172  | 13159469  |
| chr8 | 13171016  | 13171520  |

|      |          |          |
|------|----------|----------|
| chr8 | 13174406 | 13174789 |
| chr8 | 13174869 | 13175373 |
| chr8 | 13202265 | 13202482 |
| chr8 | 13338807 | 13339390 |
| chr8 | 13354441 | 13356833 |
| chr8 | 13757698 | 13758174 |
| chr8 | 13837809 | 13837937 |
| chr8 | 13876041 | 13876277 |
| chr8 | 14388467 | 14388591 |
| chr8 | 15027907 | 15028339 |
| chr8 | 18138285 | 18138393 |
| chr8 | 18696752 | 18697674 |
| chr8 | 18735903 | 18736166 |
| chr8 | 18846360 | 18846730 |
| chr8 | 18846773 | 18847123 |
| chr8 | 19698586 | 19699089 |
| chr8 | 19784769 | 19785045 |
| chr8 | 19785128 | 19785388 |
| chr8 | 19801263 | 19801404 |
| chr8 | 23587295 | 23587748 |
| chr8 | 23658438 | 23658781 |
| chr8 | 23969980 | 23970209 |
| chr8 | 23975464 | 23975661 |
| chr8 | 24521867 | 24522495 |
| chr8 | 24522566 | 24523074 |
| chr8 | 26629274 | 26629923 |
| chr8 | 26684311 | 26685149 |
| chr8 | 26712721 | 26713310 |
| chr8 | 26794930 | 26795836 |
| chr8 | 27243778 | 27244005 |
| chr8 | 28148145 | 28148730 |
| chr8 | 28221553 | 28221735 |
| chr8 | 28370706 | 28371427 |
| chr8 | 28371444 | 28372305 |
| chr8 | 32261191 | 32261427 |
| chr8 | 34710123 | 34710376 |
| chr8 | 34764003 | 34764271 |
| chr8 | 35217696 | 35217909 |
| chr8 | 39276254 | 39276387 |
| chr8 | 40068965 | 40069259 |
| chr8 | 40775925 | 40776011 |
| chr8 | 41420538 | 41420679 |
| chr8 | 41597199 | 41597416 |

|      |          |          |
|------|----------|----------|
| chr8 | 41633361 | 41633479 |
| chr8 | 42325249 | 42325648 |
| chr8 | 42326000 | 42326484 |
| chr8 | 42472010 | 42472157 |
| chr8 | 44269852 | 44270845 |
| chr8 | 44274956 | 44275512 |
| chr8 | 44439491 | 44439987 |
| chr8 | 46020628 | 46021055 |
| chr8 | 46023454 | 46023952 |
| chr8 | 46036837 | 46037636 |
| chr8 | 46049464 | 46049626 |
| chr8 | 46137124 | 46137457 |
| chr8 | 46272671 | 46272963 |
| chr8 | 48760796 | 48760993 |
| chr8 | 55162387 | 55163158 |
| chr8 | 59990767 | 59991432 |
| chr8 | 59991607 | 59991773 |
| chr8 | 63384892 | 63385041 |
| chr8 | 70021618 | 70021763 |
| chr8 | 71612847 | 71613066 |
| chr8 | 71801198 | 71801384 |
| chr8 | 71812858 | 71812963 |
| chr8 | 72582877 | 72583314 |
| chr8 | 72608006 | 72608199 |
| chr8 | 72705846 | 72706209 |
| chr8 | 73058685 | 73059234 |
| chr8 | 73222847 | 73223190 |
| chr8 | 73223243 | 73223649 |
| chr8 | 73224530 | 73224790 |
| chr8 | 73430022 | 73430625 |
| chr8 | 73861069 | 73861270 |
| chr8 | 73861338 | 73861562 |
| chr8 | 73883230 | 73883571 |
| chr8 | 73931142 | 73931887 |
| chr8 | 73943908 | 73944460 |
| chr8 | 74022796 | 74023092 |
| chr8 | 74103302 | 74103870 |
| chr8 | 74135096 | 74135493 |
| chr8 | 74148366 | 74149011 |
| chr8 | 74203286 | 74204088 |
| chr8 | 74212107 | 74212775 |
| chr8 | 74212865 | 74213550 |
| chr8 | 74281261 | 74281536 |

|      |          |          |
|------|----------|----------|
| chr8 | 74446720 | 74447017 |
| chr8 | 74561554 | 74561646 |
| chr8 | 74842971 | 74844261 |
| chr8 | 74950693 | 74950905 |
| chr8 | 75250896 | 75251112 |
| chr8 | 77517889 | 77518292 |
| chr8 | 77633463 | 77633853 |
| chr8 | 77640358 | 77641153 |
| chr8 | 77651206 | 77651631 |
| chr8 | 80626977 | 80627362 |
| chr8 | 81107883 | 81108244 |
| chr8 | 81135377 | 81135575 |
| chr8 | 81136151 | 81136252 |
| chr8 | 81182032 | 81182248 |
| chr8 | 81552538 | 81552984 |
| chr8 | 81553077 | 81553536 |
| chr8 | 81818954 | 81819241 |
| chr8 | 82163302 | 82163900 |
| chr8 | 82200427 | 82201093 |
| chr8 | 86181543 | 86181806 |
| chr8 | 86239489 | 86240091 |
| chr8 | 86423788 | 86425531 |
| chr8 | 86450186 | 86453448 |
| chr8 | 86462154 | 86464876 |
| chr8 | 86521719 | 86522213 |
| chr8 | 86939848 | 86940113 |
| chr8 | 86949945 | 86950810 |
| chr8 | 86959684 | 86960181 |
| chr8 | 86967356 | 86968385 |
| chr8 | 86974305 | 86974732 |
| chr8 | 87010950 | 87011316 |
| chr8 | 87095739 | 87096402 |
| chr8 | 87162832 | 87163128 |
| chr8 | 87214394 | 87214768 |
| chr8 | 87406330 | 87406521 |
| chr8 | 87493596 | 87493706 |
| chr8 | 87522155 | 87522530 |
| chr8 | 87551114 | 87551438 |
| chr8 | 87554090 | 87554325 |
| chr8 | 87560788 | 87561533 |
| chr8 | 87561570 | 87562554 |
| chr8 | 87573771 | 87574548 |
| chr8 | 87577300 | 87577941 |

|      |           |           |
|------|-----------|-----------|
| chr8 | 88364897  | 88365246  |
| chr8 | 88386790  | 88386990  |
| chr8 | 88450888  | 88451143  |
| chr8 | 88461358  | 88462014  |
| chr8 | 89440713  | 89440906  |
| chr8 | 89996880  | 89997437  |
| chr8 | 90012716  | 90013154  |
| chr8 | 90723440  | 90724956  |
| chr8 | 91261484  | 91261700  |
| chr8 | 91567121  | 91567553  |
| chr8 | 91567841  | 91568278  |
| chr8 | 92860368  | 92860455  |
| chr8 | 93432650  | 93433400  |
| chr8 | 93468938  | 93469115  |
| chr8 | 93619071  | 93619248  |
| chr8 | 93634169  | 93634294  |
| chr8 | 93981211  | 93981326  |
| chr8 | 94081710  | 94082574  |
| chr8 | 94106335  | 94107000  |
| chr8 | 94123785  | 94124203  |
| chr8 | 95351259  | 95351712  |
| chr8 | 95376995  | 95377279  |
| chr8 | 96334634  | 96334875  |
| chr8 | 96697016  | 96697500  |
| chr8 | 96703998  | 96704267  |
| chr8 | 96796093  | 96796364  |
| chr8 | 96837063  | 96837400  |
| chr8 | 97126130  | 97126429  |
| chr8 | 97138274  | 97138385  |
| chr8 | 97139706  | 97139855  |
| chr8 | 97227523  | 97227661  |
| chr8 | 97392931  | 97393206  |
| chr8 | 98239817  | 98240693  |
| chr8 | 101596362 | 101596516 |
| chr8 | 107696390 | 107696536 |
| chr8 | 107749262 | 107749632 |
| chr8 | 107749676 | 107750150 |
| chr8 | 107822135 | 107822624 |
| chr8 | 107880439 | 107880898 |
| chr8 | 107883049 | 107883280 |
| chr8 | 108129132 | 108129686 |
| chr8 | 108137831 | 108138376 |
| chr8 | 108160484 | 108161518 |

|      |           |           |
|------|-----------|-----------|
| chr8 | 108384547 | 108385421 |
| chr8 | 108535802 | 108536034 |
| chr8 | 108583497 | 108583665 |
| chr8 | 108687501 | 108687893 |
| chr8 | 108707843 | 108708118 |
| chr8 | 108741295 | 108741592 |
| chr8 | 109192614 | 109193424 |
| chr8 | 109193429 | 109194142 |
| chr8 | 109239046 | 109239309 |
| chr8 | 109356079 | 109356338 |
| chr8 | 109459657 | 109460559 |
| chr8 | 109535668 | 109535973 |
| chr8 | 109686299 | 109686696 |
| chr8 | 109824599 | 109824716 |
| chr8 | 109840297 | 109840410 |
| chr8 | 109896145 | 109896529 |
| chr8 | 109898395 | 109898893 |
| chr8 | 109902556 | 109903034 |
| chr8 | 111227643 | 111229135 |
| chr8 | 111238583 | 111239843 |
| chr8 | 111318549 | 111318892 |
| chr8 | 111353601 | 111353724 |
| chr8 | 111461899 | 111462076 |
| chr8 | 111663572 | 111663801 |
| chr8 | 111666949 | 111667091 |
| chr8 | 112302622 | 112303664 |
| chr8 | 112340055 | 112340264 |
| chr8 | 112347034 | 112347243 |
| chr8 | 112363067 | 112363377 |
| chr8 | 112384187 | 112384699 |
| chr8 | 112392478 | 112393214 |
| chr8 | 112465653 | 112465978 |
| chr8 | 113163256 | 113163619 |
| chr8 | 113206457 | 113207042 |
| chr8 | 113444382 | 113444580 |
| chr8 | 113447023 | 113447206 |
| chr8 | 113557745 | 113558210 |
| chr8 | 113579128 | 113579490 |
| chr8 | 113586456 | 113586584 |
| chr8 | 113653645 | 113653836 |
| chr8 | 114060649 | 114061863 |
| chr8 | 114484870 | 114485192 |
| chr8 | 114536437 | 114536647 |

|      |           |           |
|------|-----------|-----------|
| chr8 | 115228062 | 115228389 |
| chr8 | 117045689 | 117046042 |
| chr8 | 117244784 | 117244957 |
| chr8 | 117270981 | 117271425 |
| chr8 | 117338389 | 117338945 |
| chr8 | 117388284 | 117388440 |
| chr8 | 117428934 | 117429350 |
| chr8 | 117517549 | 117517657 |
| chr8 | 119652326 | 119652413 |
| chr8 | 119682146 | 119682463 |
| chr8 | 119717304 | 119717575 |
| chr8 | 119780576 | 119781634 |
| chr8 | 119781683 | 119784151 |
| chr8 | 119810901 | 119812727 |
| chr8 | 119854384 | 119854949 |
| chr8 | 119856136 | 119856604 |
| chr8 | 119880199 | 119880788 |
| chr8 | 119911104 | 119912184 |
| chr8 | 119984294 | 119984709 |
| chr8 | 121371109 | 121371204 |
| chr8 | 122807231 | 122807678 |
| chr8 | 123059552 | 123060781 |
| chr8 | 123061036 | 123062883 |
| chr8 | 123192149 | 123192675 |
| chr8 | 123193209 | 123193336 |
| chr8 | 124474503 | 124475525 |
| chr8 | 124833888 | 124834251 |
| chr8 | 124920041 | 124920273 |
| chr8 | 125566792 | 125566908 |
| chr8 | 125626250 | 125627148 |
| chr8 | 125748843 | 125749193 |
| chr8 | 125899474 | 125899964 |
| chr8 | 125924825 | 125925840 |
| chr8 | 125926142 | 125926635 |
| chr8 | 126026865 | 126027644 |
| chr8 | 126554492 | 126555096 |
| chr8 | 126755252 | 126756534 |
| chr8 | 126756873 | 126757201 |
| chr8 | 126867479 | 126868229 |
| chr8 | 127256055 | 127256998 |
| chr8 | 127696823 | 127697172 |
| chr8 | 128522832 | 128523002 |
| chr8 | 129652693 | 129653086 |

|      |           |           |
|------|-----------|-----------|
| chr8 | 129800310 | 129800433 |
| chr8 | 130003399 | 130003537 |
| chr8 | 130138610 | 130138759 |
| chr8 | 131174942 | 131175029 |
| chr8 | 131209653 | 131210304 |
| chr8 | 131246807 | 131246975 |
| chr8 | 131256620 | 131257105 |
| chr9 | 3417152   | 3417417   |
| chr9 | 4259930   | 4260176   |
| chr9 | 4260537   | 4260826   |
| chr9 | 7212933   | 7213179   |
| chr9 | 13553844  | 13554103  |
| chr9 | 13577759  | 13577954  |
| chr9 | 14576692  | 14576778  |
| chr9 | 14610374  | 14610515  |
| chr9 | 14614518  | 14615077  |
| chr9 | 15110742  | 15111050  |
| chr9 | 15118162  | 15118958  |
| chr9 | 15119189  | 15120397  |
| chr9 | 15120821  | 15121336  |
| chr9 | 15535434  | 15535699  |
| chr9 | 17331201  | 17331330  |
| chr9 | 18103250  | 18103815  |
| chr9 | 20451077  | 20451201  |
| chr9 | 20456610  | 20457403  |
| chr9 | 20693765  | 20694532  |
| chr9 | 20695024  | 20696004  |
| chr9 | 21158017  | 21158476  |
| chr9 | 21172318  | 21173068  |
| chr9 | 21173870  | 21174124  |
| chr9 | 21206565  | 21207702  |
| chr9 | 21238173  | 21238700  |
| chr9 | 21283405  | 21284162  |
| chr9 | 21285494  | 21285896  |
| chr9 | 21296545  | 21297282  |
| chr9 | 21297698  | 21299017  |
| chr9 | 21309674  | 21310289  |
| chr9 | 21392028  | 21393526  |
| chr9 | 21420617  | 21421206  |
| chr9 | 21484750  | 21485275  |
| chr9 | 21552595  | 21552980  |
| chr9 | 21815226  | 21815575  |
| chr9 | 21818368  | 21818705  |



|      |          |          |
|------|----------|----------|
| chr9 | 21875573 | 21875907 |
| chr9 | 22218799 | 22219352 |
| chr9 | 22552622 | 22552919 |
| chr9 | 25060195 | 25060982 |
| chr9 | 25066539 | 25066697 |
| chr9 | 27117884 | 27118175 |
| chr9 | 27141754 | 27142451 |
| chr9 | 27154382 | 27155762 |
| chr9 | 28827846 | 28827963 |
| chr9 | 30234669 | 30235226 |
| chr9 | 30837976 | 30838732 |
| chr9 | 30857654 | 30857858 |
| chr9 | 31088594 | 31088876 |
| chr9 | 31839883 | 31840741 |
| chr9 | 31871149 | 31871254 |
| chr9 | 31981811 | 31982199 |
| chr9 | 32003750 | 32004055 |
| chr9 | 32043987 | 32044074 |
| chr9 | 35112809 | 35113145 |
| chr9 | 35229007 | 35229599 |
| chr9 | 37296701 | 37298274 |
| chr9 | 37307510 | 37308637 |
| chr9 | 37321285 | 37322400 |
| chr9 | 37324107 | 37324499 |
| chr9 | 38202082 | 38202325 |
| chr9 | 40611594 | 40611807 |
| chr9 | 40611911 | 40612384 |
| chr9 | 40612759 | 40613046 |
| chr9 | 43552064 | 43553113 |
| chr9 | 43553166 | 43553857 |
| chr9 | 43611947 | 43614489 |
| chr9 | 43893081 | 43893468 |
| chr9 | 44142770 | 44144286 |
| chr9 | 44187655 | 44187942 |
| chr9 | 44199129 | 44200387 |
| chr9 | 44215782 | 44216133 |
| chr9 | 44233111 | 44233465 |
| chr9 | 44305940 | 44306050 |
| chr9 | 44412905 | 44413596 |
| chr9 | 44416617 | 44416708 |
| chr9 | 45178989 | 45180214 |
| chr9 | 45186768 | 45187462 |
| chr9 | 45203033 | 45204067 |

|      |          |          |
|------|----------|----------|
| chr9 | 45326921 | 45327171 |
| chr9 | 45335406 | 45335505 |
| chr9 | 45396077 | 45396316 |
| chr9 | 45669807 | 45669985 |
| chr9 | 45947950 | 45948062 |
| chr9 | 45948392 | 45948621 |
| chr9 | 47338469 | 47340374 |
| chr9 | 47346484 | 47347030 |
| chr9 | 47347822 | 47347935 |
| chr9 | 47481469 | 47482208 |
| chr9 | 47509591 | 47510630 |
| chr9 | 47517305 | 47517517 |
| chr9 | 47542171 | 47542508 |
| chr9 | 47559095 | 47559557 |
| chr9 | 47640870 | 47641091 |
| chr9 | 47995902 | 47996172 |
| chr9 | 48009904 | 48010025 |
| chr9 | 48830152 | 48830451 |
| chr9 | 48869296 | 48869411 |
| chr9 | 51856377 | 51856932 |
| chr9 | 53345255 | 53345848 |
| chr9 | 54651102 | 54652220 |
| chr9 | 54711569 | 54711874 |
| chr9 | 54748719 | 54748907 |
| chr9 | 54757622 | 54758024 |
| chr9 | 54758092 | 54758195 |
| chr9 | 54765298 | 54765526 |
| chr9 | 54798605 | 54799216 |
| chr9 | 54997208 | 54998475 |
| chr9 | 55000581 | 55001074 |
| chr9 | 55889688 | 55889934 |
| chr9 | 56920743 | 56921411 |
| chr9 | 56924104 | 56925422 |
| chr9 | 56943221 | 56943405 |
| chr9 | 56986999 | 56987721 |
| chr9 | 57369099 | 57369488 |
| chr9 | 57556464 | 57556575 |
| chr9 | 57596252 | 57596697 |
| chr9 | 57787941 | 57788061 |
| chr9 | 57809496 | 57809784 |
| chr9 | 58101076 | 58101520 |
| chr9 | 58112592 | 58112770 |
| chr9 | 58197374 | 58197586 |

|      |          |          |
|------|----------|----------|
| chr9 | 58430097 | 58430748 |
| chr9 | 58461474 | 58462050 |
| chr9 | 58494022 | 58494407 |
| chr9 | 59139365 | 59139822 |
| chr9 | 59140638 | 59141027 |
| chr9 | 59147011 | 59147378 |
| chr9 | 59160658 | 59161578 |
| chr9 | 59387724 | 59388010 |
| chr9 | 59465231 | 59465414 |
| chr9 | 59504352 | 59506757 |
| chr9 | 59521266 | 59522113 |
| chr9 | 59522382 | 59524948 |
| chr9 | 59574969 | 59575172 |
| chr9 | 59598802 | 59599111 |
| chr9 | 60721315 | 60721401 |
| chr9 | 61220519 | 61221311 |
| chr9 | 61247968 | 61248452 |
| chr9 | 62189430 | 62190991 |
| chr9 | 62191003 | 62191663 |
| chr9 | 62981088 | 62981221 |
| chr9 | 63450543 | 63450747 |
| chr9 | 64022591 | 64023100 |
| chr9 | 64023219 | 64023659 |
| chr9 | 64023676 | 64023800 |
| chr9 | 64024383 | 64025101 |
| chr9 | 64129414 | 64129789 |
| chr9 | 64143719 | 64144011 |
| chr9 | 64234071 | 64234378 |
| chr9 | 64234513 | 64235007 |
| chr9 | 64422994 | 64423405 |
| chr9 | 64437128 | 64437263 |
| chr9 | 64585861 | 64585967 |
| chr9 | 64880290 | 64880944 |
| chr9 | 64881776 | 64882120 |
| chr9 | 64983831 | 64984014 |
| chr9 | 65174894 | 65175069 |
| chr9 | 65193933 | 65194385 |
| chr9 | 65194589 | 65194791 |
| chr9 | 65288853 | 65288954 |
| chr9 | 65478175 | 65479359 |
| chr9 | 65507564 | 65508023 |
| chr9 | 65748049 | 65748143 |
| chr9 | 65756800 | 65757634 |

|      |          |          |
|------|----------|----------|
| chr9 | 65777507 | 65777610 |
| chr9 | 65861922 | 65862122 |
| chr9 | 65890105 | 65890344 |
| chr9 | 65907916 | 65908219 |
| chr9 | 65914167 | 65914693 |
| chr9 | 66348538 | 66348767 |
| chr9 | 66601072 | 66601278 |
| chr9 | 66793907 | 66794067 |
| chr9 | 68566078 | 68566210 |
| chr9 | 68601066 | 68601344 |
| chr9 | 68918761 | 68918934 |
| chr9 | 69339274 | 69339529 |
| chr9 | 69860366 | 69860549 |
| chr9 | 69862335 | 69862592 |
| chr9 | 70055526 | 70056403 |
| chr9 | 70066817 | 70067072 |
| chr9 | 70077698 | 70078052 |
| chr9 | 70192773 | 70193272 |
| chr9 | 70210060 | 70210397 |
| chr9 | 70247462 | 70247581 |
| chr9 | 70400929 | 70401182 |
| chr9 | 70402461 | 70402579 |
| chr9 | 70526800 | 70527380 |
| chr9 | 72122701 | 72123486 |
| chr9 | 72379907 | 72381074 |
| chr9 | 72413128 | 72413344 |
| chr9 | 72413729 | 72414047 |
| chr9 | 72466037 | 72466512 |
| chr9 | 72479989 | 72480075 |
| chr9 | 72481252 | 72481387 |
| chr9 | 72510181 | 72511407 |
| chr9 | 72531867 | 72532359 |
| chr9 | 72554816 | 72555160 |
| chr9 | 72563986 | 72564466 |
| chr9 | 72573081 | 72574411 |
| chr9 | 72594854 | 72595928 |
| chr9 | 72596533 | 72597536 |
| chr9 | 74885525 | 74885748 |
| chr9 | 74940452 | 74940635 |
| chr9 | 75068064 | 75068530 |
| chr9 | 75132389 | 75132725 |
| chr9 | 75186167 | 75186384 |
| chr9 | 77602536 | 77603077 |

|      |           |           |
|------|-----------|-----------|
| chr9 | 77765228  | 77765795  |
| chr9 | 77786989  | 77787432  |
| chr9 | 77811478  | 77812133  |
| chr9 | 77818321  | 77818619  |
| chr9 | 77824160  | 77824261  |
| chr9 | 77830520  | 77830943  |
| chr9 | 78371220  | 78371401  |
| chr9 | 79914919  | 79915744  |
| chr9 | 79956016  | 79956112  |
| chr9 | 83740934  | 83741508  |
| chr9 | 83823307  | 83823667  |
| chr9 | 85935038  | 85935123  |
| chr9 | 86916924  | 86917168  |
| chr9 | 88448071  | 88448228  |
| chr9 | 88970166  | 88970273  |
| chr9 | 90246831  | 90246997  |
| chr9 | 92437026  | 92437447  |
| chr9 | 94179332  | 94179415  |
| chr9 | 95772493  | 95772653  |
| chr9 | 96023544  | 96023666  |
| chr9 | 96060516  | 96060799  |
| chr9 | 96097132  | 96097435  |
| chr9 | 96105811  | 96106073  |
| chr9 | 96142728  | 96143224  |
| chr9 | 98464173  | 98464352  |
| chr9 | 98886894  | 98887273  |
| chr9 | 99179459  | 99179584  |
| chr9 | 100498812 | 100499010 |
| chr9 | 100509392 | 100509634 |
| chr9 | 100543708 | 100545173 |
| chr9 | 100604077 | 100604249 |
| chr9 | 100647785 | 100648107 |
| chr9 | 100704737 | 100704927 |
| chr9 | 100731475 | 100731718 |
| chr9 | 100847074 | 100847212 |
| chr9 | 100999800 | 101000287 |
| chr9 | 102030247 | 102030374 |
| chr9 | 102634720 | 102635068 |
| chr9 | 102737395 | 102737752 |
| chr9 | 102737805 | 102738145 |
| chr9 | 102767264 | 102767716 |
| chr9 | 102780561 | 102780850 |
| chr9 | 103014735 | 103015086 |

|      |           |           |
|------|-----------|-----------|
| chr9 | 103061835 | 103062119 |
| chr9 | 103207573 | 103207860 |
| chr9 | 103228536 | 103229464 |
| chr9 | 103229945 | 103230559 |
| chr9 | 103240388 | 103240861 |
| chr9 | 103345144 | 103345786 |
| chr9 | 106073312 | 106073638 |
| chr9 | 106091300 | 106091759 |
| chr9 | 106331959 | 106332105 |
| chr9 | 106724345 | 106725003 |
| chr9 | 107905021 | 107905204 |
| chr9 | 107947780 | 107948399 |
| chr9 | 107948524 | 107949680 |
| chr9 | 108208578 | 108209308 |
| chr9 | 108419602 | 108420421 |
| chr9 | 108435938 | 108436503 |
| chr9 | 108466038 | 108466960 |
| chr9 | 108474108 | 108474644 |
| chr9 | 108564595 | 108564871 |
| chr9 | 108699509 | 108700112 |
| chr9 | 108756672 | 108756854 |
| chr9 | 108941111 | 108941391 |
| chr9 | 108959771 | 108960134 |
| chr9 | 108998386 | 108998571 |
| chr9 | 109778151 | 109778743 |
| chr9 | 109802304 | 109802650 |
| chr9 | 109834200 | 109835764 |
| chr9 | 109849497 | 109849719 |
| chr9 | 109855077 | 109855247 |
| chr9 | 109902707 | 109902880 |
| chr9 | 109905229 | 109905490 |
| chr9 | 109922904 | 109923352 |
| chr9 | 109984235 | 109985629 |
| chr9 | 110097706 | 110097857 |
| chr9 | 110140212 | 110140816 |
| chr9 | 110208567 | 110208846 |
| chr9 | 110434987 | 110435770 |
| chr9 | 110450082 | 110450386 |
| chr9 | 111071324 | 111071425 |
| chr9 | 111073178 | 111073332 |
| chr9 | 113650642 | 113651027 |
| chr9 | 113651186 | 113651487 |
| chr9 | 113693724 | 113693930 |

|      |           |           |
|------|-----------|-----------|
| chr9 | 113747268 | 113747721 |
| chr9 | 113781046 | 113781242 |
| chr9 | 113806763 | 113806915 |
| chr9 | 113840111 | 113841036 |
| chr9 | 113994205 | 113994461 |
| chr9 | 114310418 | 114311326 |
| chr9 | 114598443 | 114598758 |
| chr9 | 114628403 | 114628519 |
| chr9 | 114656414 | 114657291 |
| chr9 | 114948621 | 114949016 |
| chr9 | 114994395 | 114994965 |
| chr9 | 115045701 | 115045813 |
| chr9 | 115083268 | 115083761 |
| chr9 | 115108826 | 115109071 |
| chr9 | 117959531 | 117959958 |
| chr9 | 118542832 | 118542942 |
| chr9 | 119255106 | 119255582 |
| chr9 | 119311180 | 119312859 |
| chr9 | 120037742 | 120038165 |
| chr9 | 120038465 | 120038724 |
| chr9 | 120039515 | 120039845 |
| chr9 | 120480611 | 120481113 |
| chr9 | 120483240 | 120483574 |
| chr9 | 120842605 | 120843746 |
| chr9 | 120849910 | 120850487 |
| chr9 | 120868388 | 120869115 |
| chr9 | 121206830 | 121207611 |
| chr9 | 121244472 | 121244607 |
| chr9 | 121281672 | 121281913 |
| chr9 | 121638522 | 121638823 |
| chr9 | 121665350 | 121665691 |
| chr9 | 122591368 | 122591828 |
| chr9 | 122887653 | 122887982 |
| chr9 | 122901332 | 122901524 |
| chrM | 0         | 2047      |
| chrM | 2177      | 4338      |
| chrM | 10911     | 15559     |
| chrX | 5684000   | 5684174   |
| chrX | 5977754   | 5978037   |
| chrX | 6062379   | 6062519   |
| chrX | 7352108   | 7352314   |
| chrX | 7418991   | 7419765   |
| chrX | 7462916   | 7463011   |

|      |          |          |
|------|----------|----------|
| chrX | 7470219  | 7470468  |
| chrX | 7497065  | 7497192  |
| chrX | 7500150  | 7500410  |
| chrX | 8439377  | 8440108  |
| chrX | 8440844  | 8441439  |
| chrX | 11427642 | 11427745 |
| chrX | 11842271 | 11842394 |
| chrX | 12187497 | 12187727 |
| chrX | 12642841 | 12643261 |
| chrX | 12648173 | 12650259 |
| chrX | 12663835 | 12663978 |
| chrX | 12694032 | 12694242 |
| chrX | 12719222 | 12719378 |
| chrX | 12780634 | 12780914 |
| chrX | 12858935 | 12859194 |
| chrX | 17740399 | 17740501 |
| chrX | 17836276 | 17836414 |
| chrX | 20015408 | 20015865 |
| chrX | 20021580 | 20021785 |
| chrX | 20058652 | 20058799 |
| chrX | 20059565 | 20059663 |
| chrX | 20275672 | 20276044 |
| chrX | 20276352 | 20276857 |
| chrX | 20293973 | 20294370 |
| chrX | 20444736 | 20444936 |
| chrX | 20573716 | 20573801 |
| chrX | 22439084 | 22439183 |
| chrX | 22607674 | 22607771 |
| chrX | 28892743 | 28892975 |
| chrX | 34295002 | 34295176 |
| chrX | 35534320 | 35534608 |
| chrX | 35557125 | 35557222 |
| chrX | 35653731 | 35653865 |
| chrX | 38579056 | 38579145 |
| chrX | 39421567 | 39422070 |
| chrX | 39432879 | 39433079 |
| chrX | 40607265 | 40607448 |
| chrX | 45265630 | 45265807 |
| chrX | 45274105 | 45274207 |
| chrX | 45611398 | 45611655 |
| chrX | 45622991 | 45623639 |
| chrX | 45695284 | 45695379 |
| chrX | 45721606 | 45722337 |



|      |          |          |
|------|----------|----------|
| chrX | 47758923 | 47759125 |
| chrX | 50341524 | 50341789 |
| chrX | 50367098 | 50367607 |
| chrX | 54719616 | 54719791 |
| chrX | 55284160 | 55285011 |
| chrX | 59192083 | 59192217 |
| chrX | 61749786 | 61749994 |
| chrX | 65932082 | 65932271 |
| chrX | 68520815 | 68521279 |
| chrX | 68564376 | 68564544 |
| chrX | 68809191 | 68809735 |
| chrX | 68809928 | 68810347 |
| chrX | 70364849 | 70365096 |
| chrX | 70728971 | 70729134 |
| chrX | 70740130 | 70741282 |
| chrX | 70887855 | 70888517 |
| chrX | 70918585 | 70919451 |
| chrX | 71035470 | 71036075 |
| chrX | 71516287 | 71516840 |
| chrX | 71517403 | 71518063 |
| chrX | 71553052 | 71553598 |
| chrX | 74756196 | 74757580 |
| chrX | 78316009 | 78316256 |
| chrX | 80781369 | 80781509 |
| chrX | 82405881 | 82405969 |
| chrX | 84067379 | 84067475 |
| chrX | 84483689 | 84483816 |
| chrX | 91614633 | 91614733 |
| chrX | 91970303 | 91970404 |
| chrX | 93363032 | 93363281 |
| chrX | 96247454 | 96247753 |
| chrX | 97638696 | 97638787 |
| chrX | 97821491 | 97821777 |
| chrX | 97875181 | 97875371 |
| chrX | 98438134 | 98438242 |
| chrX | 98665398 | 98665916 |
| chrX | 98743659 | 98743895 |
| chrX | 98753461 | 98753669 |
| chrX | 98778909 | 98779139 |
| chrX | 98835600 | 98835940 |
| chrX | 98836018 | 98836223 |
| chrX | 98847582 | 98848321 |
| chrX | 98863318 | 98863680 |

|      |           |           |
|------|-----------|-----------|
| chrX | 98878290  | 98878425  |
| chrX | 98892221  | 98893381  |
| chrX | 98904331  | 98905004  |
| chrX | 98923737  | 98923887  |
| chrX | 99320652  | 99320810  |
| chrX | 100643145 | 100643589 |
| chrX | 100643845 | 100644582 |
| chrX | 100652376 | 100653701 |
| chrX | 100661521 | 100662241 |
| chrX | 100677189 | 100677815 |
| chrX | 102308037 | 102308328 |
| chrX | 103384484 | 103384855 |
| chrX | 108490843 | 108490951 |
| chrX | 109480179 | 109480365 |
| chrX | 113772680 | 113772865 |
| chrX | 113862476 | 113862612 |
| chrX | 120516942 | 120517107 |
| chrX | 125235106 | 125235236 |
| chrX | 126317664 | 126317817 |
| chrX | 126445619 | 126445737 |
| chrX | 126509053 | 126509251 |
| chrX | 126514352 | 126514731 |
| chrX | 130880285 | 130880504 |
| chrX | 130960994 | 130961254 |
| chrX | 132335802 | 132336338 |
| chrX | 132373960 | 132374294 |
| chrX | 133124922 | 133125022 |
| chrX | 136982204 | 136982320 |
| chrX | 138414695 | 138414920 |
| chrX | 139116154 | 139116767 |
| chrX | 139117083 | 139117592 |
| chrX | 139139065 | 139139462 |
| chrX | 140752544 | 140753638 |
| chrX | 140759789 | 140760389 |
| chrX | 140765490 | 140766142 |
| chrX | 140768086 | 140768411 |
| chrX | 140770393 | 140770989 |
| chrX | 141949569 | 141949655 |
| chrX | 147481470 | 147482158 |
| chrX | 147482205 | 147482804 |
| chrX | 147489134 | 147489521 |
| chrX | 147749378 | 147749573 |
| chrX | 147778770 | 147779097 |

|      |           |           |
|------|-----------|-----------|
| chrX | 147779167 | 147779515 |
| chrX | 147779546 | 147779818 |
| chrX | 148237673 | 148238261 |
| chrX | 148238311 | 148238598 |
| chrX | 148272447 | 148272655 |
| chrX | 148278113 | 148278446 |
| chrX | 148293911 | 148294260 |
| chrX | 148331728 | 148331830 |
| chrX | 148341122 | 148341718 |
| chrX | 148362722 | 148362960 |
| chrX | 148368852 | 148369182 |
| chrX | 148615181 | 148615561 |
| chrX | 148707982 | 148708307 |
| chrX | 151413901 | 151414021 |
| chrX | 155693702 | 155694404 |
| chrX | 155695209 | 155695446 |
| chrX | 155852638 | 155852834 |
| chrX | 155887207 | 155887341 |
| chrX | 155912505 | 155912605 |
| chrX | 155970431 | 155971420 |
| chrX | 156016247 | 156016733 |
| chrX | 156016803 | 156017258 |
| chrX | 156022963 | 156023496 |
| chrX | 156967124 | 156967364 |
| chrX | 157204037 | 157204163 |
| chrX | 157553674 | 157554205 |
| chrX | 157584935 | 157585203 |
| chrX | 157600665 | 157601401 |
| chrX | 157640351 | 157640601 |
| chrX | 157642244 | 157642853 |
| chrX | 157669395 | 157670306 |
| chrX | 157671546 | 157671842 |
| chrX | 157683570 | 157683730 |
| chrX | 158507389 | 158507520 |
| chrX | 159198505 | 159198981 |
| chrX | 159377996 | 159378313 |
| chrX | 159378932 | 159379269 |
| chrX | 164068170 | 164068298 |
| chrX | 166415711 | 166417301 |
| chrX | 166421002 | 166422229 |
| chrX | 166426730 | 166428764 |
| chrX | 166437189 | 166437507 |
| chrX | 166649960 | 166650129 |

|      |          |          |
|------|----------|----------|
| chrY | 352612   | 352926   |
| chr1 | 4519097  | 4519230  |
| chr1 | 4847937  | 4848117  |
| chr1 | 4849565  | 4849772  |
| chr1 | 5073237  | 5073455  |
| chr1 | 6204742  | 6205193  |
| chr1 | 7081868  | 7082269  |
| chr1 | 8929074  | 8929522  |
| chr1 | 9918215  | 9918379  |
| chr1 | 10050907 | 10051107 |
| chr1 | 12365037 | 12365157 |
| chr1 | 13059976 | 13060349 |
| chr1 | 13060794 | 13061070 |
| chr1 | 16095506 | 16095867 |
| chr1 | 20888688 | 20888810 |
| chr1 | 24618719 | 24619347 |
| chr1 | 32645456 | 32645547 |
| chr1 | 33479593 | 33479691 |
| chr1 | 34067813 | 34069252 |
| chr1 | 34073727 | 34073819 |
| chr1 | 34117148 | 34117415 |
| chr1 | 34134080 | 34134345 |
| chr1 | 34154170 | 34154445 |
| chr1 | 34170771 | 34170898 |
| chr1 | 34201353 | 34202028 |
| chr1 | 34233888 | 34234367 |
| chr1 | 34244777 | 34247562 |
| chr1 | 34257562 | 34258302 |
| chr1 | 34314560 | 34314919 |
| chr1 | 34364316 | 34364805 |
| chr1 | 34516724 | 34516931 |
| chr1 | 34916572 | 34916680 |
| chr1 | 36125234 | 36126674 |
| chr1 | 36161012 | 36162147 |
| chr1 | 36569121 | 36569720 |
| chr1 | 36582529 | 36582860 |
| chr1 | 37062312 | 37062453 |
| chr1 | 37487029 | 37487270 |
| chr1 | 38081187 | 38081495 |
| chr1 | 39424759 | 39424991 |
| chr1 | 39425138 | 39425719 |
| chr1 | 39425940 | 39426544 |
| chr1 | 39576377 | 39576643 |

|      |          |          |
|------|----------|----------|
| chr1 | 39959032 | 39959880 |
| chr1 | 42754081 | 42754176 |
| chr1 | 43170487 | 43170612 |
| chr1 | 43502639 | 43502818 |
| chr1 | 44023266 | 44023650 |
| chr1 | 44255520 | 44255804 |
| chr1 | 44608840 | 44609020 |
| chr1 | 45405663 | 45405889 |
| chr1 | 45803746 | 45803911 |
| chr1 | 45853070 | 45853428 |
| chr1 | 45853900 | 45854205 |
| chr1 | 46431079 | 46431194 |
| chr1 | 47487756 | 47487841 |
| chr1 | 55145020 | 55145290 |
| chr1 | 59539263 | 59539877 |
| chr1 | 59741835 | 59742138 |
| chr1 | 59748766 | 59749046 |
| chr1 | 59749195 | 59749691 |
| chr1 | 59752430 | 59752555 |
| chr1 | 59761031 | 59761361 |
| chr1 | 59761617 | 59761787 |
| chr1 | 59820410 | 59821084 |
| chr1 | 59883656 | 59883871 |
| chr1 | 60155188 | 60155424 |
| chr1 | 60248958 | 60249108 |
| chr1 | 60291840 | 60291974 |
| chr1 | 60316886 | 60317093 |
| chr1 | 63223673 | 63224022 |
| chr1 | 63225119 | 63225760 |
| chr1 | 63294852 | 63295153 |
| chr1 | 63296612 | 63296707 |
| chr1 | 63320058 | 63320515 |
| chr1 | 63492415 | 63493312 |
| chr1 | 63537421 | 63537789 |
| chr1 | 63542328 | 63542963 |
| chr1 | 63550128 | 63550806 |
| chr1 | 63559030 | 63559412 |
| chr1 | 63606163 | 63606598 |
| chr1 | 63614715 | 63615179 |
| chr1 | 63624043 | 63624753 |
| chr1 | 63638208 | 63638824 |
| chr1 | 64737517 | 64737956 |
| chr1 | 64737974 | 64738373 |

|      |          |          |
|------|----------|----------|
| chr1 | 65285784 | 65285875 |
| chr1 | 65292912 | 65293333 |
| chr1 | 65294181 | 65294266 |
| chr1 | 65323941 | 65324470 |
| chr1 | 66747514 | 66748021 |
| chr1 | 66786303 | 66786576 |
| chr1 | 72272812 | 72273062 |
| chr1 | 72283518 | 72283769 |
| chr1 | 72290439 | 72291165 |
| chr1 | 72301580 | 72301946 |
| chr1 | 72354047 | 72354474 |
| chr1 | 72424534 | 72425422 |
| chr1 | 72427501 | 72427808 |
| chr1 | 72766621 | 72767518 |
| chr1 | 72785389 | 72786246 |
| chr1 | 72794232 | 72794667 |
| chr1 | 72818499 | 72818644 |
| chr1 | 72871064 | 72871924 |
| chr1 | 72895276 | 72895927 |
| chr1 | 72898584 | 72899070 |
| chr1 | 74283078 | 74283741 |
| chr1 | 74298337 | 74298565 |
| chr1 | 74300430 | 74300761 |
| chr1 | 74399166 | 74400179 |
| chr1 | 74552932 | 74553380 |
| chr1 | 74725740 | 74726391 |
| chr1 | 75209390 | 75209664 |
| chr1 | 75240775 | 75241422 |
| chr1 | 75381760 | 75382142 |
| chr1 | 75437174 | 75437948 |
| chr1 | 75532696 | 75532815 |
| chr1 | 80132040 | 80132180 |
| chr1 | 82836040 | 82836946 |
| chr1 | 82870013 | 82870196 |
| chr1 | 84836572 | 84836856 |
| chr1 | 85283088 | 85283318 |
| chr1 | 87690363 | 87691141 |
| chr1 | 87804223 | 87804611 |
| chr1 | 87804793 | 87805215 |
| chr1 | 87978716 | 87978826 |
| chr1 | 87983863 | 87984041 |
| chr1 | 88023248 | 88023619 |
| chr1 | 88063439 | 88063701 |

|      |           |           |
|------|-----------|-----------|
| chr1 | 88203159  | 88203880  |
| chr1 | 88257746  | 88257995  |
| chr1 | 88384441  | 88384655  |
| chr1 | 88423367  | 88426061  |
| chr1 | 88501862  | 88502199  |
| chr1 | 88502414  | 88502747  |
| chr1 | 88702699  | 88702830  |
| chr1 | 88814482  | 88814656  |
| chr1 | 88922252  | 88922494  |
| chr1 | 89110551  | 89111013  |
| chr1 | 89123960  | 89124624  |
| chr1 | 89132349  | 89133023  |
| chr1 | 89223628  | 89224194  |
| chr1 | 89266037  | 89266294  |
| chr1 | 89580387  | 89581307  |
| chr1 | 89604948  | 89605447  |
| chr1 | 89610955  | 89611602  |
| chr1 | 89652568  | 89652820  |
| chr1 | 89673429  | 89673832  |
| chr1 | 89681129  | 89681435  |
| chr1 | 89750236  | 89750785  |
| chr1 | 89760950  | 89761110  |
| chr1 | 89796875  | 89797268  |
| chr1 | 89804591  | 89805198  |
| chr1 | 89839012  | 89839736  |
| chr1 | 91351309  | 91353772  |
| chr1 | 91371278  | 91372148  |
| chr1 | 91402849  | 91403542  |
| chr1 | 91476493  | 91477405  |
| chr1 | 91539522  | 91539755  |
| chr1 | 91548745  | 91548997  |
| chr1 | 91827404  | 91827811  |
| chr1 | 91856711  | 91856843  |
| chr1 | 92914986  | 92915140  |
| chr1 | 94728402  | 94728597  |
| chr1 | 94755002  | 94755446  |
| chr1 | 95255282  | 95255422  |
| chr1 | 95375561  | 95375969  |
| chr1 | 95629935  | 95630018  |
| chr1 | 95673642  | 95673960  |
| chr1 | 97210360  | 97210641  |
| chr1 | 98513674  | 98513780  |
| chr1 | 107586402 | 107586634 |

|      |           |           |
|------|-----------|-----------|
| chr1 | 107694801 | 107695076 |
| chr1 | 108156860 | 108156944 |
| chr1 | 116540814 | 116540924 |
| chr1 | 118643419 | 118643528 |
| chr1 | 120286174 | 120286313 |
| chr1 | 120409310 | 120409523 |
| chr1 | 120545723 | 120546131 |
| chr1 | 120573889 | 120575379 |
| chr1 | 120580141 | 120581158 |
| chr1 | 121318416 | 121318854 |
| chr1 | 121318928 | 121319113 |
| chr1 | 121983987 | 121984304 |
| chr1 | 125101742 | 125101841 |
| chr1 | 129101744 | 129102117 |
| chr1 | 129112023 | 129112266 |
| chr1 | 129228388 | 129228660 |
| chr1 | 129271607 | 129271969 |
| chr1 | 129670965 | 129671618 |
| chr1 | 129698925 | 129699215 |
| chr1 | 129700710 | 129700972 |
| chr1 | 129828183 | 129828383 |
| chr1 | 129999987 | 130000243 |
| chr1 | 130025284 | 130025579 |
| chr1 | 130052348 | 130052673 |
| chr1 | 130079716 | 130079940 |
| chr1 | 130154337 | 130154606 |
| chr1 | 130173892 | 130174164 |
| chr1 | 133175762 | 133175897 |
| chr1 | 133713061 | 133713525 |
| chr1 | 133743895 | 133744523 |
| chr1 | 133807047 | 133807906 |
| chr1 | 133828481 | 133829436 |
| chr1 | 133830631 | 133832339 |
| chr1 | 133904402 | 133904967 |
| chr1 | 134087787 | 134088653 |
| chr1 | 134348206 | 134348371 |
| chr1 | 134373955 | 134374266 |
| chr1 | 134912369 | 134912507 |
| chr1 | 134930532 | 134930659 |
| chr1 | 135027785 | 135028791 |
| chr1 | 136302346 | 136303135 |
| chr1 | 136304154 | 136305236 |
| chr1 | 136307215 | 136308217 |



|      |           |           |
|------|-----------|-----------|
| chr1 | 136377629 | 136377859 |
| chr1 | 136456809 | 136458009 |
| chr1 | 136458020 | 136458511 |
| chr1 | 136522647 | 136522769 |
| chr1 | 136543505 | 136544111 |
| chr1 | 136605750 | 136606043 |
| chr1 | 137006994 | 137007300 |
| chr1 | 137043378 | 137043670 |
| chr1 | 137043813 | 137044281 |
| chr1 | 137051864 | 137052346 |
| chr1 | 137129459 | 137129845 |
| chr1 | 137648547 | 137648714 |
| chr1 | 137665137 | 137665844 |
| chr1 | 138000841 | 138001213 |
| chr1 | 138063723 | 138064182 |
| chr1 | 138394157 | 138394257 |
| chr1 | 138521554 | 138521958 |
| chr1 | 138595219 | 138595570 |
| chr1 | 138618753 | 138619271 |
| chr1 | 141351371 | 141351514 |
| chr1 | 145586598 | 145586938 |
| chr1 | 145626056 | 145626304 |
| chr1 | 153191625 | 153192305 |
| chr1 | 153418631 | 153418861 |
| chr1 | 153602486 | 153602795 |
| chr1 | 153645064 | 153645314 |
| chr1 | 153666635 | 153666735 |
| chr1 | 153667307 | 153667524 |
| chr1 | 154941321 | 154941842 |
| chr1 | 154956610 | 154956963 |
| chr1 | 155284783 | 155284899 |
| chr1 | 155292382 | 155292489 |
| chr1 | 155747111 | 155747245 |
| chr1 | 157010385 | 157010707 |
| chr1 | 157405361 | 157405808 |
| chr1 | 157419401 | 157419693 |
| chr1 | 157801701 | 157801834 |
| chr1 | 157883001 | 157883450 |
| chr1 | 158488974 | 158489334 |
| chr1 | 158489404 | 158489646 |
| chr1 | 158535093 | 158535446 |
| chr1 | 158555476 | 158555695 |
| chr1 | 158571878 | 158572277 |

|      |           |           |
|------|-----------|-----------|
| chr1 | 161270414 | 161270603 |
| chr1 | 162965299 | 162965764 |
| chr1 | 162965838 | 162968651 |
| chr1 | 163099471 | 163099585 |
| chr1 | 164509272 | 164509393 |
| chr1 | 166179175 | 166179711 |
| chr1 | 166313558 | 166313771 |
| chr1 | 167571770 | 167571880 |
| chr1 | 168095627 | 168096153 |
| chr1 | 168096322 | 168096565 |
| chr1 | 169238948 | 169239156 |
| chr1 | 169279178 | 169279287 |
| chr1 | 172958098 | 172958300 |
| chr1 | 172968740 | 172968875 |
| chr1 | 172975115 | 172975241 |
| chr1 | 172996106 | 172996245 |
| chr1 | 172996760 | 172996877 |
| chr1 | 173003740 | 173003882 |
| chr1 | 173004432 | 173004554 |
| chr1 | 173011354 | 173011497 |
| chr1 | 173012005 | 173012123 |
| chr1 | 173032493 | 173032626 |
| chr1 | 173032881 | 173033012 |
| chr1 | 173033164 | 173033291 |
| chr1 | 173041573 | 173041711 |
| chr1 | 173341580 | 173341974 |
| chr1 | 173393250 | 173393625 |
| chr1 | 173599602 | 173599689 |
| chr1 | 174078411 | 174078602 |
| chr1 | 174109322 | 174109583 |
| chr1 | 174124916 | 174125577 |
| chr1 | 174151801 | 174151961 |
| chr1 | 174436691 | 174437478 |
| chr1 | 175320486 | 175320576 |
| chr1 | 175366367 | 175366721 |
| chr1 | 175376577 | 175376949 |
| chr1 | 177834675 | 177834799 |
| chr1 | 178939988 | 178940084 |
| chr1 | 179917573 | 179917762 |
| chr1 | 180567028 | 180567243 |
| chr1 | 182588112 | 182588314 |
| chr1 | 182867297 | 182867409 |
| chr1 | 183081224 | 183081453 |

|       |           |           |
|-------|-----------|-----------|
| chr1  | 183098766 | 183099032 |
| chr1  | 183958878 | 183958967 |
| chr1  | 184695846 | 184696262 |
| chr1  | 184794974 | 184795532 |
| chr1  | 184815181 | 184816459 |
| chr1  | 187028053 | 187028541 |
| chr1  | 187066783 | 187066967 |
| chr1  | 187087625 | 187087985 |
| chr1  | 187094666 | 187094943 |
| chr1  | 187187161 | 187187643 |
| chr1  | 189067781 | 189067949 |
| chr1  | 189120355 | 189120573 |
| chr1  | 189130751 | 189131273 |
| chr1  | 190765310 | 190765405 |
| chr1  | 191552101 | 191553214 |
| chr1  | 191559819 | 191560311 |
| chr1  | 191570303 | 191570644 |
| chr1  | 191601584 | 191601992 |
| chr1  | 193432469 | 193432592 |
| chr1  | 193602787 | 193603552 |
| chr1  | 193735753 | 193736039 |
| chr1  | 194484344 | 194484436 |
| chr1  | 194571761 | 194571936 |
| chr10 | 4541099   | 4541538   |
| chr10 | 4546489   | 4546792   |
| chr10 | 5936673   | 5937017   |
| chr10 | 5972749   | 5972921   |
| chr10 | 6097575   | 6097989   |
| chr10 | 6605921   | 6606011   |
| chr10 | 7309939   | 7310412   |
| chr10 | 7522100   | 7522294   |
| chr10 | 7538616   | 7538827   |
| chr10 | 7676433   | 7676641   |
| chr10 | 9820755   | 9820944   |
| chr10 | 11001032  | 11001282  |
| chr10 | 12083206  | 12083389  |
| chr10 | 12728590  | 12728870  |
| chr10 | 16489023  | 16489116  |
| chr10 | 17775472  | 17776216  |
| chr10 | 17789709  | 17790022  |
| chr10 | 17796094  | 17796277  |
| chr10 | 17810369  | 17810738  |
| chr10 | 18038318  | 18038823  |

|       |          |          |
|-------|----------|----------|
| chr10 | 18049311 | 18049805 |
| chr10 | 18281287 | 18281542 |
| chr10 | 18289872 | 18290281 |
| chr10 | 18298959 | 18299483 |
| chr10 | 18310751 | 18312281 |
| chr10 | 18343226 | 18343378 |
| chr10 | 18564836 | 18565190 |
| chr10 | 19502658 | 19502791 |
| chr10 | 19588766 | 19588857 |
| chr10 | 19654291 | 19654577 |
| chr10 | 19681878 | 19682066 |
| chr10 | 19834573 | 19834827 |
| chr10 | 19868790 | 19869681 |
| chr10 | 19900769 | 19901152 |
| chr10 | 19928284 | 19928367 |
| chr10 | 20032306 | 20033196 |
| chr10 | 20043270 | 20043761 |
| chr10 | 20071588 | 20071798 |
| chr10 | 20766008 | 20766218 |
| chr10 | 21050890 | 21051546 |
| chr10 | 21716777 | 21717366 |
| chr10 | 21718451 | 21719397 |
| chr10 | 22465341 | 22465592 |
| chr10 | 23531477 | 23531564 |
| chr10 | 23884845 | 23884985 |
| chr10 | 24315322 | 24315635 |
| chr10 | 24316231 | 24316444 |
| chr10 | 24591146 | 24591500 |
| chr10 | 24608844 | 24609182 |
| chr10 | 24613825 | 24613926 |
| chr10 | 25079678 | 25080475 |
| chr10 | 25091433 | 25091551 |
| chr10 | 25106406 | 25107032 |
| chr10 | 25210751 | 25211207 |
| chr10 | 25219396 | 25219845 |
| chr10 | 25222257 | 25222750 |
| chr10 | 25242809 | 25243161 |
| chr10 | 27672182 | 27672299 |
| chr10 | 27794670 | 27795383 |
| chr10 | 27821971 | 27822225 |
| chr10 | 27851735 | 27852182 |
| chr10 | 27867832 | 27868169 |
| chr10 | 28113327 | 28113571 |

|       |          |          |
|-------|----------|----------|
| chr10 | 28224753 | 28224963 |
| chr10 | 30213764 | 30213882 |
| chr10 | 30530935 | 30531073 |
| chr10 | 39152188 | 39152279 |
| chr10 | 39185244 | 39185679 |
| chr10 | 39191783 | 39192466 |
| chr10 | 39283806 | 39284004 |
| chr10 | 39346769 | 39346904 |
| chr10 | 39451948 | 39452396 |
| chr10 | 39452433 | 39452826 |
| chr10 | 39471722 | 39472052 |
| chr10 | 39544026 | 39544676 |
| chr10 | 39978270 | 39978593 |
| chr10 | 40069393 | 40070231 |
| chr10 | 40116633 | 40116736 |
| chr10 | 40145527 | 40145929 |
| chr10 | 40178908 | 40179173 |
| chr10 | 40271049 | 40271144 |
| chr10 | 40604135 | 40604489 |
| chr10 | 41233026 | 41233281 |
| chr10 | 41248515 | 41249432 |
| chr10 | 41249445 | 41250327 |
| chr10 | 41250391 | 41250805 |
| chr10 | 42481355 | 42482341 |
| chr10 | 42969326 | 42969658 |
| chr10 | 43007892 | 43008037 |
| chr10 | 43638897 | 43639152 |
| chr10 | 44899158 | 44899402 |
| chr10 | 45595199 | 45595485 |
| chr10 | 45595524 | 45595758 |
| chr10 | 45661739 | 45661843 |
| chr10 | 50470447 | 50470707 |
| chr10 | 51953432 | 51954114 |
| chr10 | 52137381 | 52138173 |
| chr10 | 53129983 | 53130212 |
| chr10 | 53317021 | 53317444 |
| chr10 | 56108523 | 56108753 |
| chr10 | 57206523 | 57206702 |
| chr10 | 57805719 | 57806227 |
| chr10 | 57856073 | 57856179 |
| chr10 | 57909902 | 57910161 |
| chr10 | 57921261 | 57921459 |
| chr10 | 57950911 | 57951064 |

|       |          |          |
|-------|----------|----------|
| chr10 | 57965238 | 57965731 |
| chr10 | 58009269 | 58009478 |
| chr10 | 58786149 | 58786495 |
| chr10 | 58786881 | 58787070 |
| chr10 | 58834127 | 58834723 |
| chr10 | 59181881 | 59181988 |
| chr10 | 59503800 | 59504039 |
| chr10 | 59508544 | 59508832 |
| chr10 | 59533834 | 59533986 |
| chr10 | 59740462 | 59740652 |
| chr10 | 59757280 | 59757662 |
| chr10 | 59764444 | 59765262 |
| chr10 | 60881063 | 60881378 |
| chr10 | 60887650 | 60888051 |
| chr10 | 60980468 | 60980710 |
| chr10 | 61012337 | 61012598 |
| chr10 | 61116649 | 61116865 |
| chr10 | 61143047 | 61143518 |
| chr10 | 61159176 | 61159670 |
| chr10 | 62433924 | 62434218 |
| chr10 | 62706579 | 62707212 |
| chr10 | 62735206 | 62735452 |
| chr10 | 62748002 | 62748321 |
| chr10 | 62763547 | 62763834 |
| chr10 | 62768113 | 62768634 |
| chr10 | 66559104 | 66560368 |
| chr10 | 66569026 | 66570405 |
| chr10 | 66580320 | 66581082 |
| chr10 | 66589337 | 66590372 |
| chr10 | 66682623 | 66683463 |
| chr10 | 68880396 | 68881004 |
| chr10 | 68903964 | 68904266 |
| chr10 | 69559710 | 69560361 |
| chr10 | 69642053 | 69642417 |
| chr10 | 69651815 | 69652232 |
| chr10 | 70810557 | 70810998 |
| chr10 | 70811051 | 70811355 |
| chr10 | 70825086 | 70825416 |
| chr10 | 72136908 | 72137549 |
| chr10 | 74525568 | 74525983 |
| chr10 | 74674877 | 74675297 |
| chr10 | 75398631 | 75398829 |
| chr10 | 75398975 | 75399339 |

|       |          |          |
|-------|----------|----------|
| chr10 | 75399984 | 75400589 |
| chr10 | 75495399 | 75495615 |
| chr10 | 75905639 | 75905840 |
| chr10 | 75938362 | 75938526 |
| chr10 | 75944042 | 75944828 |
| chr10 | 76732083 | 76732225 |
| chr10 | 77060912 | 77061409 |
| chr10 | 77531090 | 77532493 |
| chr10 | 77541766 | 77542188 |
| chr10 | 77776965 | 77777065 |
| chr10 | 79144915 | 79145239 |
| chr10 | 79171213 | 79172161 |
| chr10 | 79174172 | 79174539 |
| chr10 | 79317386 | 79318367 |
| chr10 | 79371937 | 79372071 |
| chr10 | 79425905 | 79426201 |
| chr10 | 79448249 | 79448389 |
| chr10 | 79516368 | 79516956 |
| chr10 | 79517019 | 79517274 |
| chr10 | 79518455 | 79519043 |
| chr10 | 79578552 | 79579141 |
| chr10 | 79580179 | 79580502 |
| chr10 | 79605086 | 79605881 |
| chr10 | 79633462 | 79634274 |
| chr10 | 79634413 | 79635274 |
| chr10 | 79689494 | 79689859 |
| chr10 | 79711898 | 79712019 |
| chr10 | 79740908 | 79741668 |
| chr10 | 79741782 | 79742822 |
| chr10 | 79750240 | 79750677 |
| chr10 | 79755207 | 79755753 |
| chr10 | 79756180 | 79756605 |
| chr10 | 80069899 | 80070733 |
| chr10 | 80085829 | 80086545 |
| chr10 | 80254033 | 80254513 |
| chr10 | 80255008 | 80255680 |
| chr10 | 80266664 | 80267661 |
| chr10 | 80291553 | 80291686 |
| chr10 | 80392895 | 80393055 |
| chr10 | 80568692 | 80568958 |
| chr10 | 80584703 | 80585098 |
| chr10 | 80600527 | 80601619 |
| chr10 | 80611267 | 80612041 |

|       |          |          |
|-------|----------|----------|
| chr10 | 80612350 | 80613058 |
| chr10 | 80639389 | 80640987 |
| chr10 | 80641101 | 80645454 |
| chr10 | 80779678 | 80780079 |
| chr10 | 80827224 | 80827446 |
| chr10 | 80850664 | 80851035 |
| chr10 | 81022237 | 81022798 |
| chr10 | 81022839 | 81023348 |
| chr10 | 81028124 | 81028915 |
| chr10 | 81070874 | 81071098 |
| chr10 | 81121772 | 81121961 |
| chr10 | 81620380 | 81620752 |
| chr10 | 81832674 | 81832834 |
| chr10 | 82323105 | 82324068 |
| chr10 | 82359642 | 82360312 |
| chr10 | 82472049 | 82472330 |
| chr10 | 82658027 | 82658412 |
| chr10 | 82836120 | 82837257 |
| chr10 | 82844841 | 82847277 |
| chr10 | 82855386 | 82855757 |
| chr10 | 82859152 | 82861146 |
| chr10 | 82867666 | 82868855 |
| chr10 | 82876093 | 82878206 |
| chr10 | 82887103 | 82890123 |
| chr10 | 82897198 | 82897796 |
| chr10 | 82912130 | 82912808 |
| chr10 | 82920288 | 82920866 |
| chr10 | 82940572 | 82940971 |
| chr10 | 83025262 | 83025574 |
| chr10 | 83185618 | 83186029 |
| chr10 | 84128580 | 84128948 |
| chr10 | 84174271 | 84174697 |
| chr10 | 84565832 | 84566139 |
| chr10 | 84870129 | 84870572 |
| chr10 | 84929871 | 84930273 |
| chr10 | 84936170 | 84936584 |
| chr10 | 85497987 | 85498222 |
| chr10 | 85763284 | 85763554 |
| chr10 | 86170109 | 86170255 |
| chr10 | 86259171 | 86259553 |
| chr10 | 89208029 | 89208385 |
| chr10 | 89407261 | 89407368 |
| chr10 | 92623529 | 92624421 |



|       |           |           |
|-------|-----------|-----------|
| chr10 | 92624541  | 92624690  |
| chr10 | 92643914  | 92644073  |
| chr10 | 92661400  | 92661605  |
| chr10 | 92691773  | 92691861  |
| chr10 | 92932834  | 92933285  |
| chr10 | 92944301  | 92944463  |
| chr10 | 94051962  | 94052141  |
| chr10 | 94151536  | 94151892  |
| chr10 | 94154898  | 94155280  |
| chr10 | 94157730  | 94157928  |
| chr10 | 94249523  | 94249675  |
| chr10 | 94821102  | 94821199  |
| chr10 | 94977769  | 94978600  |
| chr10 | 94981755  | 94982225  |
| chr10 | 95489677  | 95489912  |
| chr10 | 95592876  | 95592969  |
| chr10 | 96079662  | 96080070  |
| chr10 | 98377327  | 98378110  |
| chr10 | 98378123  | 98378526  |
| chr10 | 98441454  | 98441624  |
| chr10 | 104477328 | 104477524 |
| chr10 | 105280671 | 105280992 |
| chr10 | 107599177 | 107599511 |
| chr10 | 107599570 | 107600165 |
| chr10 | 107616043 | 107616407 |
| chr10 | 107770005 | 107770531 |
| chr10 | 107786718 | 107786906 |
| chr10 | 107800616 | 107800916 |
| chr10 | 107807819 | 107807939 |
| chr10 | 107820823 | 107820955 |
| chr10 | 110910253 | 110910990 |
| chr10 | 110918539 | 110918861 |
| chr10 | 110933385 | 110933695 |
| chr10 | 114428621 | 114428710 |
| chr10 | 114707001 | 114707125 |
| chr10 | 114822043 | 114822351 |
| chr10 | 114822398 | 114823146 |
| chr10 | 114843458 | 114843807 |
| chr10 | 114864790 | 114865122 |
| chr10 | 116018994 | 116019173 |
| chr10 | 118890592 | 118891374 |
| chr10 | 118891478 | 118892624 |
| chr10 | 118913905 | 118914200 |

|       |           |           |
|-------|-----------|-----------|
| chr10 | 118956057 | 118956740 |
| chr10 | 119054973 | 119055128 |
| chr10 | 119135856 | 119135968 |
| chr10 | 119599070 | 119599387 |
| chr10 | 119665445 | 119665809 |
| chr10 | 119667404 | 119667853 |
| chr10 | 119792004 | 119792115 |
| chr10 | 121200276 | 121200378 |
| chr10 | 122115946 | 122116041 |
| chr10 | 122117370 | 122117640 |
| chr10 | 122869624 | 122869717 |
| chr10 | 125403257 | 125403542 |
| chr10 | 126500596 | 126501645 |
| chr10 | 126703430 | 126703867 |
| chr10 | 126718550 | 126718818 |
| chr10 | 126817745 | 126818245 |
| chr10 | 126918703 | 126918874 |
| chr10 | 127456615 | 127456945 |
| chr10 | 127476259 | 127477790 |
| chr10 | 127477827 | 127478634 |
| chr10 | 127496013 | 127496300 |
| chr10 | 127496376 | 127497124 |
| chr10 | 127507357 | 127507550 |
| chr10 | 127513388 | 127513513 |
| chr10 | 127520365 | 127520666 |
| chr10 | 127520940 | 127521324 |
| chr10 | 127522121 | 127522743 |
| chr10 | 127533810 | 127534643 |
| chr10 | 127547863 | 127548310 |
| chr10 | 127552902 | 127553305 |
| chr10 | 127563718 | 127565581 |
| chr10 | 127565672 | 127565962 |
| chr10 | 127669142 | 127669718 |
| chr10 | 127687818 | 127688110 |
| chr10 | 127711130 | 127711526 |
| chr10 | 127774866 | 127775350 |
| chr10 | 127799087 | 127799540 |
| chr10 | 127827849 | 127828385 |
| chr10 | 127831621 | 127832218 |
| chr10 | 127878836 | 127879082 |
| chr10 | 127925002 | 127925559 |
| chr10 | 127927022 | 127927199 |
| chr10 | 128185492 | 128186190 |

|       |           |           |
|-------|-----------|-----------|
| chr10 | 128244128 | 128244501 |
| chr10 | 128268480 | 128268842 |
| chr10 | 128300707 | 128301055 |
| chr11 | 3026950   | 3027727   |
| chr11 | 3059558   | 3060021   |
| chr11 | 3102677   | 3103082   |
| chr11 | 3103245   | 3103464   |
| chr11 | 3131092   | 3131322   |
| chr11 | 3549299   | 3549914   |
| chr11 | 3550262   | 3550514   |
| chr11 | 3583450   | 3584141   |
| chr11 | 3878885   | 3879249   |
| chr11 | 4567377   | 4567622   |
| chr11 | 4634639   | 4635262   |
| chr11 | 4784098   | 4784540   |
| chr11 | 4795379   | 4795876   |
| chr11 | 4892000   | 4892400   |
| chr11 | 5151866   | 5151987   |
| chr11 | 5391005   | 5391199   |
| chr11 | 5689592   | 5690246   |
| chr11 | 6200946   | 6201478   |
| chr11 | 6221165   | 6221649   |
| chr11 | 6231909   | 6232020   |
| chr11 | 6289100   | 6290246   |
| chr11 | 6290419   | 6291935   |
| chr11 | 6303688   | 6303987   |
| chr11 | 6305010   | 6305765   |
| chr11 | 6315892   | 6316833   |
| chr11 | 6463833   | 6464409   |
| chr11 | 6472740   | 6473233   |
| chr11 | 6527916   | 6528272   |
| chr11 | 7769770   | 7769901   |
| chr11 | 9031683   | 9032153   |
| chr11 | 11806820  | 11806930  |
| chr11 | 11807726  | 11808225  |
| chr11 | 12554867  | 12555139  |
| chr11 | 12640234  | 12640374  |
| chr11 | 16490706  | 16490963  |
| chr11 | 16851732  | 16851833  |
| chr11 | 17059503  | 17060189  |
| chr11 | 19824156  | 19826668  |
| chr11 | 19838562  | 19841617  |
| chr11 | 19847169  | 19848573  |

|       |          |          |
|-------|----------|----------|
| chr11 | 19859842 | 19860376 |
| chr11 | 19864880 | 19865577 |
| chr11 | 19882975 | 19883678 |
| chr11 | 19900762 | 19901099 |
| chr11 | 19912506 | 19912942 |
| chr11 | 20058526 | 20058792 |
| chr11 | 20101479 | 20102208 |
| chr11 | 20125531 | 20125944 |
| chr11 | 20443300 | 20444138 |
| chr11 | 20495523 | 20495853 |
| chr11 | 20513222 | 20513622 |
| chr11 | 20532005 | 20532508 |
| chr11 | 20991346 | 20992015 |
| chr11 | 21024561 | 21025002 |
| chr11 | 21042881 | 21043242 |
| chr11 | 21138749 | 21139765 |
| chr11 | 21148217 | 21149240 |
| chr11 | 21171971 | 21172227 |
| chr11 | 22768935 | 22769024 |
| chr11 | 22873162 | 22873401 |
| chr11 | 22902236 | 22902480 |
| chr11 | 23155983 | 23157046 |
| chr11 | 23171404 | 23172273 |
| chr11 | 23206370 | 23207287 |
| chr11 | 23263887 | 23264506 |
| chr11 | 23269496 | 23269863 |
| chr11 | 23622575 | 23622797 |
| chr11 | 29030778 | 29031251 |
| chr11 | 29046816 | 29047064 |
| chr11 | 29073009 | 29073557 |
| chr11 | 29092909 | 29093097 |
| chr11 | 29273652 | 29274291 |
| chr11 | 29432959 | 29433221 |
| chr11 | 29592943 | 29594356 |
| chr11 | 29642051 | 29642707 |
| chr11 | 30283885 | 30284026 |
| chr11 | 30671767 | 30672616 |
| chr11 | 30683114 | 30683707 |
| chr11 | 30729607 | 30729938 |
| chr11 | 30765897 | 30766748 |
| chr11 | 30971722 | 30971917 |
| chr11 | 31318570 | 31318811 |
| chr11 | 32355345 | 32355806 |

|       |          |          |
|-------|----------|----------|
| chr11 | 32542726 | 32543583 |
| chr11 | 32562051 | 32562218 |
| chr11 | 32592558 | 32592864 |
| chr11 | 32593053 | 32593296 |
| chr11 | 33413673 | 33413923 |
| chr11 | 33434763 | 33435347 |
| chr11 | 33449433 | 33450310 |
| chr11 | 33460784 | 33461355 |
| chr11 | 33467613 | 33468310 |
| chr11 | 33468986 | 33471661 |
| chr11 | 33478221 | 33479110 |
| chr11 | 33492523 | 33493743 |
| chr11 | 34712535 | 34712648 |
| chr11 | 34892319 | 34893206 |
| chr11 | 34934543 | 34935046 |
| chr11 | 34935162 | 34935576 |
| chr11 | 35014722 | 35014863 |
| chr11 | 35072704 | 35072926 |
| chr11 | 35094191 | 35094555 |
| chr11 | 35208756 | 35209117 |
| chr11 | 35583430 | 35583893 |
| chr11 | 35589730 | 35590011 |
| chr11 | 36536382 | 36536504 |
| chr11 | 40067044 | 40067381 |
| chr11 | 40327827 | 40327920 |
| chr11 | 40547234 | 40547862 |
| chr11 | 43495501 | 43496084 |
| chr11 | 43522477 | 43522605 |
| chr11 | 44332924 | 44333181 |
| chr11 | 44333246 | 44333830 |
| chr11 | 44352446 | 44352841 |
| chr11 | 45665528 | 45666440 |
| chr11 | 45879144 | 45879522 |
| chr11 | 45926335 | 45926561 |
| chr11 | 45957478 | 45957742 |
| chr11 | 45959911 | 45960666 |
| chr11 | 46250600 | 46250823 |
| chr11 | 48613860 | 48614571 |
| chr11 | 48615059 | 48616224 |
| chr11 | 48616622 | 48617064 |
| chr11 | 48632033 | 48632161 |
| chr11 | 48667152 | 48667258 |
| chr11 | 48669784 | 48669903 |

|       |          |          |
|-------|----------|----------|
| chr11 | 48670129 | 48670255 |
| chr11 | 49017044 | 49017313 |
| chr11 | 49024423 | 49024642 |
| chr11 | 49060739 | 49060832 |
| chr11 | 49526402 | 49526658 |
| chr11 | 49646020 | 49646361 |
| chr11 | 49779217 | 49779407 |
| chr11 | 49977271 | 49977981 |
| chr11 | 49978186 | 49978427 |
| chr11 | 50002287 | 50002647 |
| chr11 | 50038878 | 50039261 |
| chr11 | 50051431 | 50053059 |
| chr11 | 50079937 | 50080997 |
| chr11 | 50084696 | 50085820 |
| chr11 | 50191293 | 50192164 |
| chr11 | 51401841 | 51402120 |
| chr11 | 51863817 | 51864111 |
| chr11 | 51912620 | 51913333 |
| chr11 | 51930475 | 51930638 |
| chr11 | 52045568 | 52046136 |
| chr11 | 52174536 | 52175088 |
| chr11 | 52202037 | 52202623 |
| chr11 | 52498896 | 52499175 |
| chr11 | 53164273 | 53165374 |
| chr11 | 53231018 | 53231245 |
| chr11 | 53351465 | 53351716 |
| chr11 | 53351791 | 53352719 |
| chr11 | 53401930 | 53402557 |
| chr11 | 53913702 | 53915061 |
| chr11 | 53932773 | 53933944 |
| chr11 | 53935794 | 53936831 |
| chr11 | 54251991 | 54252313 |
| chr11 | 54311884 | 54312157 |
| chr11 | 54419921 | 54420273 |
| chr11 | 54467452 | 54467563 |
| chr11 | 54508306 | 54508618 |
| chr11 | 54679955 | 54680361 |
| chr11 | 54723515 | 54723700 |
| chr11 | 54923021 | 54923488 |
| chr11 | 55133255 | 55133345 |
| chr11 | 55283261 | 55284127 |
| chr11 | 55295920 | 55296606 |
| chr11 | 56936946 | 56937073 |

|       |          |          |
|-------|----------|----------|
| chr11 | 57464923 | 57465406 |
| chr11 | 57579501 | 57579587 |
| chr11 | 57615121 | 57615773 |
| chr11 | 57621173 | 57621718 |
| chr11 | 57822371 | 57823646 |
| chr11 | 57846476 | 57846843 |
| chr11 | 57856075 | 57856764 |
| chr11 | 57873463 | 57874813 |
| chr11 | 58121122 | 58122072 |
| chr11 | 58123413 | 58123956 |
| chr11 | 58798130 | 58799331 |
| chr11 | 58800707 | 58801207 |
| chr11 | 59319887 | 59320180 |
| chr11 | 59323416 | 59323510 |
| chr11 | 59553120 | 59553968 |
| chr11 | 59918460 | 59919625 |
| chr11 | 59988979 | 59991049 |
| chr11 | 60230836 | 60231297 |
| chr11 | 60270213 | 60270691 |
| chr11 | 60351375 | 60351984 |
| chr11 | 61827160 | 61827331 |
| chr11 | 62053473 | 62053584 |
| chr11 | 62062496 | 62063018 |
| chr11 | 62080087 | 62080286 |
| chr11 | 62096224 | 62097038 |
| chr11 | 62118243 | 62118697 |
| chr11 | 62134342 | 62134830 |
| chr11 | 62308914 | 62309182 |
| chr11 | 62317211 | 62317437 |
| chr11 | 62365093 | 62365335 |
| chr11 | 62366308 | 62366562 |
| chr11 | 62374009 | 62374116 |
| chr11 | 62374291 | 62374565 |
| chr11 | 62416382 | 62417524 |
| chr11 | 62417926 | 62418354 |
| chr11 | 62590484 | 62590683 |
| chr11 | 62702230 | 62703087 |
| chr11 | 64792576 | 64793118 |
| chr11 | 65439907 | 65440009 |
| chr11 | 67302683 | 67302888 |
| chr11 | 67899712 | 67900099 |
| chr11 | 67924922 | 67925815 |
| chr11 | 67938428 | 67938880 |

|       |          |          |
|-------|----------|----------|
| chr11 | 67960302 | 67960904 |
| chr11 | 68530624 | 68530900 |
| chr11 | 68538518 | 68538788 |
| chr11 | 68553762 | 68554219 |
| chr11 | 68610978 | 68611193 |
| chr11 | 68619913 | 68620012 |
| chr11 | 68715125 | 68715526 |
| chr11 | 68829623 | 68829910 |
| chr11 | 68850496 | 68850620 |
| chr11 | 68853890 | 68854011 |
| chr11 | 68854476 | 68854607 |
| chr11 | 68859195 | 68859845 |
| chr11 | 68886924 | 68887132 |
| chr11 | 68903971 | 68904570 |
| chr11 | 68904825 | 68905711 |
| chr11 | 68923985 | 68924083 |
| chr11 | 68924440 | 68924559 |
| chr11 | 68937737 | 68937875 |
| chr11 | 69182407 | 69182566 |
| chr11 | 69393910 | 69395305 |
| chr11 | 69404784 | 69405291 |
| chr11 | 69446326 | 69447349 |
| chr11 | 69466086 | 69466928 |
| chr11 | 69592929 | 69593322 |
| chr11 | 69715373 | 69715817 |
| chr11 | 69716679 | 69717228 |
| chr11 | 69749220 | 69753684 |
| chr11 | 69778990 | 69779401 |
| chr11 | 69794468 | 69795137 |
| chr11 | 69810352 | 69811166 |
| chr11 | 69820722 | 69820997 |
| chr11 | 69840939 | 69841233 |
| chr11 | 69856332 | 69856531 |
| chr11 | 70340626 | 70340812 |
| chr11 | 70368578 | 70368753 |
| chr11 | 70393815 | 70394361 |
| chr11 | 70419562 | 70420510 |
| chr11 | 70422689 | 70423694 |
| chr11 | 70460824 | 70461505 |
| chr11 | 70515456 | 70516054 |
| chr11 | 70658264 | 70658901 |
| chr11 | 70711656 | 70711902 |
| chr11 | 70749006 | 70749267 |



|       |          |          |
|-------|----------|----------|
| chr11 | 71858372 | 71858947 |
| chr11 | 72420779 | 72422367 |
| chr11 | 72428653 | 72428768 |
| chr11 | 72429155 | 72429266 |
| chr11 | 72480120 | 72480349 |
| chr11 | 72609898 | 72610154 |
| chr11 | 72738489 | 72738814 |
| chr11 | 72774695 | 72775641 |
| chr11 | 72805331 | 72805733 |
| chr11 | 72861288 | 72861768 |
| chr11 | 74133293 | 74133464 |
| chr11 | 74463196 | 74463904 |
| chr11 | 74478582 | 74478846 |
| chr11 | 74600291 | 74600649 |
| chr11 | 74615530 | 74615736 |
| chr11 | 74644209 | 74645092 |
| chr11 | 74649969 | 74650415 |
| chr11 | 74656031 | 74657414 |
| chr11 | 74718853 | 74719109 |
| chr11 | 74739493 | 74739990 |
| chr11 | 74751907 | 74752091 |
| chr11 | 74803774 | 74803883 |
| chr11 | 74814570 | 74815057 |
| chr11 | 74893035 | 74893457 |
| chr11 | 74947400 | 74947727 |
| chr11 | 74976830 | 74977352 |
| chr11 | 75018301 | 75018733 |
| chr11 | 75190465 | 75190571 |
| chr11 | 75201047 | 75201195 |
| chr11 | 75217254 | 75217402 |
| chr11 | 75275916 | 75276302 |
| chr11 | 75276688 | 75276828 |
| chr11 | 75300342 | 75300692 |
| chr11 | 75314286 | 75314799 |
| chr11 | 75386367 | 75386642 |
| chr11 | 75414088 | 75415087 |
| chr11 | 75492813 | 75493485 |
| chr11 | 75546308 | 75547282 |
| chr11 | 75550719 | 75551103 |
| chr11 | 75578178 | 75578588 |
| chr11 | 75578638 | 75579127 |
| chr11 | 76766077 | 76766472 |
| chr11 | 77280812 | 77281111 |

|       |          |          |
|-------|----------|----------|
| chr11 | 77281218 | 77281618 |
| chr11 | 77306796 | 77307864 |
| chr11 | 77319944 | 77321279 |
| chr11 | 77499644 | 77500387 |
| chr11 | 77500435 | 77501526 |
| chr11 | 77599378 | 77600039 |
| chr11 | 77603607 | 77605234 |
| chr11 | 77635068 | 77635802 |
| chr11 | 77672293 | 77672662 |
| chr11 | 77678069 | 77679542 |
| chr11 | 77796247 | 77797328 |
| chr11 | 77797343 | 77798264 |
| chr11 | 77873068 | 77873302 |
| chr11 | 77873651 | 77873970 |
| chr11 | 77908328 | 77908690 |
| chr11 | 77920946 | 77921279 |
| chr11 | 77928490 | 77929500 |
| chr11 | 78062854 | 78063025 |
| chr11 | 78063675 | 78063854 |
| chr11 | 78075260 | 78075978 |
| chr11 | 78086561 | 78087541 |
| chr11 | 78128669 | 78129177 |
| chr11 | 78640230 | 78640775 |
| chr11 | 78644245 | 78644510 |
| chr11 | 78655081 | 78655687 |
| chr11 | 79153091 | 79153988 |
| chr11 | 79176584 | 79176708 |
| chr11 | 79242601 | 79242784 |
| chr11 | 79289826 | 79290089 |
| chr11 | 79291221 | 79292004 |
| chr11 | 79508249 | 79508885 |
| chr11 | 79510329 | 79510759 |
| chr11 | 79518160 | 79518285 |
| chr11 | 79524941 | 79525969 |
| chr11 | 79806579 | 79807564 |
| chr11 | 79845760 | 79847270 |
| chr11 | 79902940 | 79903492 |
| chr11 | 79948000 | 79948444 |
| chr11 | 79968031 | 79968320 |
| chr11 | 79991020 | 79991434 |
| chr11 | 80022836 | 80023096 |
| chr11 | 80079562 | 80079927 |
| chr11 | 80114492 | 80114735 |

|       |          |          |
|-------|----------|----------|
| chr11 | 80196894 | 80197492 |
| chr11 | 80242118 | 80242716 |
| chr11 | 80285454 | 80286553 |
| chr11 | 83084998 | 83085249 |
| chr11 | 83107756 | 83107972 |
| chr11 | 83186274 | 83186556 |
| chr11 | 83216214 | 83216451 |
| chr11 | 83286591 | 83287891 |
| chr11 | 83308957 | 83309527 |
| chr11 | 83318249 | 83318643 |
| chr11 | 83581980 | 83582088 |
| chr11 | 84025536 | 84025716 |
| chr11 | 84071687 | 84071960 |
| chr11 | 84693879 | 84694281 |
| chr11 | 84709538 | 84709757 |
| chr11 | 84720108 | 84720630 |
| chr11 | 85058160 | 85058260 |
| chr11 | 85331946 | 85332099 |
| chr11 | 85364619 | 85364733 |
| chr11 | 85417122 | 85417748 |
| chr11 | 85454096 | 85454482 |
| chr11 | 85519443 | 85519827 |
| chr11 | 85635303 | 85635480 |
| chr11 | 86075676 | 86075775 |
| chr11 | 86923327 | 86923659 |
| chr11 | 86940622 | 86941010 |
| chr11 | 86964512 | 86965087 |
| chr11 | 86970408 | 86970776 |
| chr11 | 86981623 | 86981871 |
| chr11 | 87218530 | 87218836 |
| chr11 | 87236310 | 87236581 |
| chr11 | 87240216 | 87240427 |
| chr11 | 87256602 | 87257007 |
| chr11 | 87261992 | 87262727 |
| chr11 | 87268245 | 87269248 |
| chr11 | 87275686 | 87276102 |
| chr11 | 87284733 | 87285136 |
| chr11 | 87330926 | 87331054 |
| chr11 | 87662992 | 87663086 |
| chr11 | 87861205 | 87862369 |
| chr11 | 88766475 | 88766568 |
| chr11 | 88836967 | 88837278 |
| chr11 | 88860737 | 88861745 |

|       |          |          |
|-------|----------|----------|
| chr11 | 88872167 | 88873355 |
| chr11 | 93746758 | 93748713 |
| chr11 | 93754752 | 93754879 |
| chr11 | 93857404 | 93857560 |
| chr11 | 93860785 | 93860987 |
| chr11 | 94072802 | 94073254 |
| chr11 | 94189350 | 94190198 |
| chr11 | 94491092 | 94491665 |
| chr11 | 94499095 | 94499295 |
| chr11 | 94504501 | 94505314 |
| chr11 | 94781025 | 94781176 |
| chr11 | 94797412 | 94797927 |
| chr11 | 94799834 | 94799958 |
| chr11 | 94803038 | 94803145 |
| chr11 | 94812785 | 94814322 |
| chr11 | 94852234 | 94853029 |
| chr11 | 94866561 | 94866929 |
| chr11 | 94866987 | 94867560 |
| chr11 | 94868017 | 94868260 |
| chr11 | 95186623 | 95186962 |
| chr11 | 95198221 | 95199398 |
| chr11 | 95305451 | 95305736 |
| chr11 | 95508200 | 95508607 |
| chr11 | 95537728 | 95537925 |
| chr11 | 95574305 | 95575133 |
| chr11 | 95624911 | 95625314 |
| chr11 | 95629661 | 95630690 |
| chr11 | 95893991 | 95894254 |
| chr11 | 95901423 | 95901694 |
| chr11 | 96112535 | 96112958 |
| chr11 | 96206889 | 96207009 |
| chr11 | 96650469 | 96650845 |
| chr11 | 96668399 | 96668659 |
| chr11 | 97012724 | 97013118 |
| chr11 | 97224367 | 97224794 |
| chr11 | 97277099 | 97277705 |
| chr11 | 97352846 | 97353056 |
| chr11 | 97361886 | 97362571 |
| chr11 | 97362941 | 97363447 |
| chr11 | 97480904 | 97481226 |
| chr11 | 97524188 | 97526028 |
| chr11 | 97526039 | 97527558 |
| chr11 | 97533888 | 97535410 |

|       |           |           |
|-------|-----------|-----------|
| chr11 | 97539318  | 97540513  |
| chr11 | 97542852  | 97544364  |
| chr11 | 97545745  | 97546684  |
| chr11 | 97568238  | 97568565  |
| chr11 | 97658381  | 97658518  |
| chr11 | 97669894  | 97671203  |
| chr11 | 97686593  | 97687051  |
| chr11 | 97698013  | 97699913  |
| chr11 | 97888308  | 97888811  |
| chr11 | 98064150  | 98064969  |
| chr11 | 98072082  | 98072542  |
| chr11 | 98089447  | 98089611  |
| chr11 | 98219910  | 98220185  |
| chr11 | 98227812  | 98228116  |
| chr11 | 98543904  | 98544124  |
| chr11 | 98556589  | 98557244  |
| chr11 | 98626673  | 98627402  |
| chr11 | 98656422  | 98657794  |
| chr11 | 98698509  | 98698915  |
| chr11 | 98834947  | 98835426  |
| chr11 | 98902529  | 98903170  |
| chr11 | 99122594  | 99122688  |
| chr11 | 99247705  | 99247913  |
| chr11 | 99255604  | 99255689  |
| chr11 | 99717619  | 99717751  |
| chr11 | 100181300 | 100182012 |
| chr11 | 100484207 | 100484403 |
| chr11 | 100932303 | 100932443 |
| chr11 | 100944597 | 100944866 |
| chr11 | 101120615 | 101120822 |
| chr11 | 101177586 | 101177770 |
| chr11 | 101183214 | 101184502 |
| chr11 | 101303718 | 101303943 |
| chr11 | 101466161 | 101466414 |
| chr11 | 101488677 | 101488928 |
| chr11 | 101492130 | 101492854 |
| chr11 | 101503059 | 101503270 |
| chr11 | 101519549 | 101519760 |
| chr11 | 101528458 | 101528930 |
| chr11 | 101609993 | 101610323 |
| chr11 | 102055027 | 102055378 |
| chr11 | 102123425 | 102124090 |
| chr11 | 102149791 | 102150552 |

|       |           |           |
|-------|-----------|-----------|
| chr11 | 102178119 | 102182406 |
| chr11 | 102261094 | 102261286 |
| chr11 | 102429268 | 102429462 |
| chr11 | 102911974 | 102912352 |
| chr11 | 104092813 | 104093270 |
| chr11 | 104172837 | 104173389 |
| chr11 | 104180171 | 104180823 |
| chr11 | 104181198 | 104181691 |
| chr11 | 104187775 | 104187997 |
| chr11 | 104190538 | 104190802 |
| chr11 | 104864677 | 104864799 |
| chr11 | 104988084 | 104988501 |
| chr11 | 105027566 | 105027931 |
| chr11 | 105042833 | 105043435 |
| chr11 | 105043437 | 105043764 |
| chr11 | 105123803 | 105123989 |
| chr11 | 105529026 | 105529130 |
| chr11 | 105585572 | 105585700 |
| chr11 | 105918559 | 105918914 |
| chr11 | 105927939 | 105928240 |
| chr11 | 105946376 | 105946754 |
| chr11 | 106078271 | 106078648 |
| chr11 | 106362228 | 106362883 |
| chr11 | 106586570 | 106586691 |
| chr11 | 106874177 | 106874306 |
| chr11 | 106993099 | 106993221 |
| chr11 | 107419458 | 107419696 |
| chr11 | 107531349 | 107531889 |
| chr11 | 107532379 | 107532718 |
| chr11 | 108357903 | 108358033 |
| chr11 | 109224154 | 109224504 |
| chr11 | 109340278 | 109340391 |
| chr11 | 109340912 | 109341452 |
| chr11 | 109356571 | 109356843 |
| chr11 | 109469800 | 109469887 |
| chr11 | 109512282 | 109513115 |
| chr11 | 109528898 | 109529122 |
| chr11 | 110278604 | 110278898 |
| chr11 | 110321017 | 110321240 |
| chr11 | 114529892 | 114530531 |
| chr11 | 114565686 | 114566194 |
| chr11 | 115024707 | 115024919 |
| chr11 | 115245981 | 115246377 |

|       |           |           |
|-------|-----------|-----------|
| chr11 | 115255959 | 115256648 |
| chr11 | 115274312 | 115274420 |
| chr11 | 115275091 | 115275219 |
| chr11 | 115281763 | 115282377 |
| chr11 | 115439007 | 115439953 |
| chr11 | 115442259 | 115443229 |
| chr11 | 115502039 | 115502133 |
| chr11 | 115652903 | 115653272 |
| chr11 | 115659895 | 115660282 |
| chr11 | 115676019 | 115676354 |
| chr11 | 115676420 | 115676789 |
| chr11 | 115685366 | 115685662 |
| chr11 | 115726236 | 115726546 |
| chr11 | 115749820 | 115749993 |
| chr11 | 115891695 | 115892128 |
| chr11 | 116295728 | 116296409 |
| chr11 | 116533777 | 116534026 |
| chr11 | 116534881 | 116536256 |
| chr11 | 116555501 | 116556359 |
| chr11 | 116780566 | 116780879 |
| chr11 | 116834730 | 116835285 |
| chr11 | 116938543 | 116938932 |
| chr11 | 116982077 | 116983146 |
| chr11 | 117019683 | 117020108 |
| chr11 | 117128689 | 117129081 |
| chr11 | 117193448 | 117194162 |
| chr11 | 117516081 | 117516983 |
| chr11 | 117517077 | 117517567 |
| chr11 | 117593340 | 117593441 |
| chr11 | 117670960 | 117672378 |
| chr11 | 117673713 | 117675561 |
| chr11 | 117848194 | 117848713 |
| chr11 | 117853879 | 117854961 |
| chr11 | 117925728 | 117926567 |
| chr11 | 117926643 | 117929061 |
| chr11 | 117960570 | 117960918 |
| chr11 | 119129398 | 119129597 |
| chr11 | 119310140 | 119310267 |
| chr11 | 119311032 | 119311135 |
| chr11 | 119464711 | 119465166 |
| chr11 | 119468561 | 119469318 |
| chr11 | 119569039 | 119569631 |
| chr11 | 119664906 | 119665231 |

|       |           |           |
|-------|-----------|-----------|
| chr11 | 119684365 | 119684913 |
| chr11 | 119702166 | 119702917 |
| chr11 | 119735512 | 119735868 |
| chr11 | 120466561 | 120466951 |
| chr11 | 120538644 | 120538930 |
| chr11 | 120548316 | 120548922 |
| chr11 | 120569777 | 120570602 |
| chr11 | 120624731 | 120624949 |
| chr11 | 120647193 | 120647419 |
| chr11 | 120818735 | 120819997 |
| chr11 | 121008353 | 121008730 |
| chr11 | 121065846 | 121066261 |
| chr11 | 121082283 | 121082551 |
| chr11 | 121121649 | 121122423 |
| chr11 | 121138532 | 121139135 |
| chr11 | 121291372 | 121291576 |
| chr11 | 121322162 | 121322522 |
| chr11 | 121450435 | 121450536 |
| chr11 | 121454527 | 121454616 |
| chr12 | 3109894   | 3110100   |
| chr12 | 3426922   | 3427793   |
| chr12 | 3438352   | 3438505   |
| chr12 | 3468534   | 3469002   |
| chr12 | 3490117   | 3490433   |
| chr12 | 3758095   | 3758223   |
| chr12 | 3926596   | 3926680   |
| chr12 | 4599868   | 4600409   |
| chr12 | 4653940   | 4654116   |
| chr12 | 4765377   | 4765490   |
| chr12 | 4924265   | 4924876   |
| chr12 | 5649857   | 5650029   |
| chr12 | 6777751   | 6777934   |
| chr12 | 8221574   | 8221845   |
| chr12 | 8681020   | 8681933   |
| chr12 | 8706779   | 8707077   |
| chr12 | 8723094   | 8723237   |
| chr12 | 8723810   | 8724059   |
| chr12 | 8778198   | 8779086   |
| chr12 | 8928864   | 8929143   |
| chr12 | 8934699   | 8934923   |
| chr12 | 8944959   | 8945535   |
| chr12 | 9000654   | 9000891   |
| chr12 | 9017222   | 9017443   |



|       |          |          |
|-------|----------|----------|
| chr12 | 12706868 | 12706979 |
| chr12 | 12877361 | 12877517 |
| chr12 | 12887896 | 12888023 |
| chr12 | 12918796 | 12918976 |
| chr12 | 16817849 | 16818089 |
| chr12 | 16833113 | 16833254 |
| chr12 | 16901647 | 16902546 |
| chr12 | 16932213 | 16932330 |
| chr12 | 16946757 | 16946973 |
| chr12 | 16998637 | 16998758 |
| chr12 | 17273387 | 17273614 |
| chr12 | 17290776 | 17291184 |
| chr12 | 17391337 | 17391943 |
| chr12 | 17552860 | 17553142 |
| chr12 | 17697610 | 17699674 |
| chr12 | 17899962 | 17900133 |
| chr12 | 17910824 | 17911025 |
| chr12 | 17929892 | 17930102 |
| chr12 | 18163014 | 18163186 |
| chr12 | 18394753 | 18394973 |
| chr12 | 19294379 | 19294563 |
| chr12 | 19315497 | 19315773 |
| chr12 | 20202866 | 20203145 |
| chr12 | 20231021 | 20231226 |
| chr12 | 20256423 | 20256563 |
| chr12 | 20318450 | 20318679 |
| chr12 | 22859335 | 22859538 |
| chr12 | 23266536 | 23266703 |
| chr12 | 24809691 | 24809775 |
| chr12 | 25152083 | 25152181 |
| chr12 | 25204526 | 25204630 |
| chr12 | 25393157 | 25393504 |
| chr12 | 25550636 | 25550957 |
| chr12 | 25609425 | 25609566 |
| chr12 | 25730181 | 25730482 |
| chr12 | 29334535 | 29334765 |
| chr12 | 29454810 | 29455115 |
| chr12 | 29470679 | 29470811 |
| chr12 | 29507515 | 29507881 |
| chr12 | 29542055 | 29542828 |
| chr12 | 30623436 | 30623740 |
| chr12 | 31950163 | 31950471 |
| chr12 | 31972362 | 31972507 |

|       |          |          |
|-------|----------|----------|
| chr12 | 31985855 | 31986119 |
| chr12 | 32404169 | 32404428 |
| chr12 | 32521091 | 32521201 |
| chr12 | 33505178 | 33506121 |
| chr12 | 33514415 | 33514746 |
| chr12 | 33639024 | 33639396 |
| chr12 | 37542833 | 37543277 |
| chr12 | 40486055 | 40486368 |
| chr12 | 41172911 | 41173427 |
| chr12 | 41514097 | 41514235 |
| chr12 | 41620290 | 41620384 |
| chr12 | 41853561 | 41853969 |
| chr12 | 41886828 | 41887058 |
| chr12 | 41913222 | 41913646 |
| chr12 | 41933321 | 41933787 |
| chr12 | 41948632 | 41948946 |
| chr12 | 41960833 | 41961190 |
| chr12 | 41968809 | 41968952 |
| chr12 | 41987335 | 41987650 |
| chr12 | 41987837 | 41988346 |
| chr12 | 41995838 | 41995939 |
| chr12 | 42011325 | 42011576 |
| chr12 | 42016302 | 42016582 |
| chr12 | 42074182 | 42075422 |
| chr12 | 42211584 | 42211947 |
| chr12 | 42814828 | 42815079 |
| chr12 | 44844026 | 44844186 |
| chr12 | 52470945 | 52471258 |
| chr12 | 52471533 | 52471892 |
| chr12 | 52521197 | 52521442 |
| chr12 | 53209353 | 53209506 |
| chr12 | 53283133 | 53283303 |
| chr12 | 53604991 | 53605467 |
| chr12 | 53704773 | 53704910 |
| chr12 | 55340230 | 55340376 |
| chr12 | 55433456 | 55433588 |
| chr12 | 55797767 | 55797983 |
| chr12 | 55811293 | 55811501 |
| chr12 | 55815202 | 55815412 |
| chr12 | 55830586 | 55830800 |
| chr12 | 56181596 | 56181810 |
| chr12 | 56950527 | 56950710 |
| chr12 | 57479416 | 57479525 |

|       |          |          |
|-------|----------|----------|
| chr12 | 60129121 | 60129328 |
| chr12 | 60141319 | 60141571 |
| chr12 | 60172875 | 60173253 |
| chr12 | 60235044 | 60235223 |
| chr12 | 60773975 | 60774152 |
| chr12 | 63542744 | 63542827 |
| chr12 | 66066786 | 66067394 |
| chr12 | 66116535 | 66116661 |
| chr12 | 66137400 | 66137873 |
| chr12 | 66200420 | 66200797 |
| chr12 | 66523949 | 66524040 |
| chr12 | 70260279 | 70260630 |
| chr12 | 70298234 | 70299250 |
| chr12 | 70397690 | 70398021 |
| chr12 | 70398269 | 70398567 |
| chr12 | 70400417 | 70400548 |
| chr12 | 70473373 | 70473829 |
| chr12 | 70826007 | 70826332 |
| chr12 | 71031895 | 71032115 |
| chr12 | 71066557 | 71066876 |
| chr12 | 71926514 | 71927279 |
| chr12 | 72047750 | 72047855 |
| chr12 | 72296965 | 72297344 |
| chr12 | 72303546 | 72304237 |
| chr12 | 72329036 | 72329210 |
| chr12 | 72932388 | 72933132 |
| chr12 | 72942395 | 72942513 |
| chr12 | 73052852 | 73053042 |
| chr12 | 73862193 | 73863232 |
| chr12 | 73893203 | 73893514 |
| chr12 | 74095574 | 74095670 |
| chr12 | 74226316 | 74226590 |
| chr12 | 74283918 | 74284186 |
| chr12 | 74306125 | 74306232 |
| chr12 | 75009000 | 75009298 |
| chr12 | 75984898 | 75984982 |
| chr12 | 76772732 | 76773060 |
| chr12 | 77330456 | 77330619 |
| chr12 | 77330700 | 77331862 |
| chr12 | 77356250 | 77357702 |
| chr12 | 77373901 | 77374172 |
| chr12 | 77386042 | 77386691 |
| chr12 | 77407637 | 77408236 |

|       |          |          |
|-------|----------|----------|
| chr12 | 77669778 | 77670252 |
| chr12 | 78674514 | 78675006 |
| chr12 | 79328127 | 79328794 |
| chr12 | 79850004 | 79850596 |
| chr12 | 79978751 | 79978975 |
| chr12 | 80131539 | 80131675 |
| chr12 | 80134226 | 80134534 |
| chr12 | 80428514 | 80429385 |
| chr12 | 80442376 | 80442953 |
| chr12 | 80464207 | 80464773 |
| chr12 | 80524961 | 80525898 |
| chr12 | 80575261 | 80575593 |
| chr12 | 80579224 | 80579997 |
| chr12 | 80601099 | 80601532 |
| chr12 | 80612540 | 80613159 |
| chr12 | 80634521 | 80634839 |
| chr12 | 80659737 | 80660162 |
| chr12 | 80677965 | 80678214 |
| chr12 | 80707169 | 80707850 |
| chr12 | 80735485 | 80736043 |
| chr12 | 80760845 | 80761424 |
| chr12 | 80904829 | 80905105 |
| chr12 | 81537419 | 81537607 |
| chr12 | 81781765 | 81782101 |
| chr12 | 81823385 | 81823665 |
| chr12 | 81891487 | 81892303 |
| chr12 | 81912746 | 81913077 |
| chr12 | 81931453 | 81931816 |
| chr12 | 81951917 | 81952231 |
| chr12 | 81978133 | 81979401 |
| chr12 | 81979482 | 81980130 |
| chr12 | 82012463 | 82012610 |
| chr12 | 82046547 | 82047548 |
| chr12 | 82049108 | 82049521 |
| chr12 | 82120678 | 82121184 |
| chr12 | 82127642 | 82128254 |
| chr12 | 82960918 | 82961765 |
| chr12 | 83095905 | 83096284 |
| chr12 | 83270374 | 83271570 |
| chr12 | 83382184 | 83382291 |
| chr12 | 83384528 | 83384972 |
| chr12 | 83420531 | 83420899 |
| chr12 | 83552265 | 83552408 |

|       |           |           |
|-------|-----------|-----------|
| chr12 | 84973274  | 84974429  |
| chr12 | 84980435  | 84980783  |
| chr12 | 85003532  | 85003972  |
| chr12 | 85009045  | 85009276  |
| chr12 | 85029182  | 85029654  |
| chr12 | 85075481  | 85075993  |
| chr12 | 85481406  | 85481507  |
| chr12 | 85811111  | 85811698  |
| chr12 | 85843923  | 85844056  |
| chr12 | 85855080  | 85855575  |
| chr12 | 86337684  | 86338251  |
| chr12 | 86355812  | 86356485  |
| chr12 | 86391727  | 86392152  |
| chr12 | 87499292  | 87499674  |
| chr12 | 87644335  | 87644530  |
| chr12 | 87811111  | 87813159  |
| chr12 | 87859784  | 87862559  |
| chr12 | 88488240  | 88489196  |
| chr12 | 88496704  | 88497231  |
| chr12 | 91633536  | 91633625  |
| chr12 | 92040095  | 92040194  |
| chr12 | 92828784  | 92829063  |
| chr12 | 96858036  | 96858174  |
| chr12 | 99985288  | 99985664  |
| chr12 | 100001441 | 100001554 |
| chr12 | 100015172 | 100015412 |
| chr12 | 101189666 | 101189820 |
| chr12 | 101437751 | 101437959 |
| chr12 | 101438053 | 101438360 |
| chr12 | 102019272 | 102019602 |
| chr12 | 102106825 | 102107267 |
| chr12 | 103214202 | 103214503 |
| chr12 | 103996188 | 103996582 |
| chr12 | 104013984 | 104014530 |
| chr12 | 106578001 | 106578311 |
| chr12 | 107022954 | 107024385 |
| chr12 | 107025816 | 107026309 |
| chr12 | 107042603 | 107043031 |
| chr12 | 107049229 | 107049455 |
| chr12 | 107248475 | 107248939 |
| chr12 | 107254990 | 107255129 |
| chr12 | 109418024 | 109418372 |
| chr12 | 109440215 | 109441091 |

|       |           |           |
|-------|-----------|-----------|
| chr12 | 110031237 | 110032953 |
| chr12 | 110044685 | 110044931 |
| chr12 | 110050869 | 110051244 |
| chr12 | 110052810 | 110053056 |
| chr12 | 110053546 | 110054027 |
| chr12 | 110132520 | 110132961 |
| chr12 | 110174580 | 110175337 |
| chr12 | 110215732 | 110216511 |
| chr12 | 110782461 | 110788539 |
| chr12 | 110804304 | 110805333 |
| chr12 | 110874088 | 110874396 |
| chr12 | 110884038 | 110884568 |
| chr12 | 110887808 | 110887947 |
| chr12 | 110888704 | 110889459 |
| chr12 | 110889616 | 110889753 |
| chr12 | 110892836 | 110893072 |
| chr12 | 110894478 | 110894676 |
| chr12 | 110918154 | 110918355 |
| chr12 | 110919009 | 110919137 |
| chr12 | 110919705 | 110919896 |
| chr12 | 110923171 | 110923281 |
| chr12 | 110925006 | 110925119 |
| chr12 | 110962965 | 110963583 |
| chr12 | 110975003 | 110975301 |
| chr12 | 111727151 | 111728547 |
| chr12 | 111737486 | 111738407 |
| chr12 | 111748454 | 111748878 |
| chr12 | 111750797 | 111751221 |
| chr12 | 111760896 | 111761268 |
| chr12 | 111773970 | 111774661 |
| chr12 | 111779942 | 111781305 |
| chr12 | 111839682 | 111840242 |
| chr12 | 111855965 | 111856441 |
| chr12 | 111891499 | 111891705 |
| chr12 | 111976248 | 111976904 |
| chr12 | 112083565 | 112083664 |
| chr12 | 112127478 | 112127978 |
| chr12 | 112277997 | 112278721 |
| chr12 | 112314947 | 112315446 |
| chr12 | 112427073 | 112427313 |
| chr12 | 112776448 | 112777505 |
| chr12 | 112779140 | 112779333 |
| chr12 | 112793384 | 112793481 |

|       |           |           |
|-------|-----------|-----------|
| chr12 | 112825358 | 112826004 |
| chr12 | 112864594 | 112864848 |
| chr12 | 112916363 | 112916736 |
| chr12 | 112997096 | 112998066 |
| chr12 | 113027670 | 113029243 |
| chr12 | 113029323 | 113030192 |
| chr12 | 113065334 | 113065612 |
| chr12 | 113273970 | 113274145 |
| chr12 | 113350854 | 113351250 |
| chr12 | 113351820 | 113352894 |
| chr12 | 113842340 | 113843048 |
| chr12 | 113851958 | 113852635 |
| chr12 | 113852858 | 113853764 |
| chr12 | 113960627 | 113961105 |
| chr12 | 113983114 | 113984147 |
| chr12 | 114254969 | 114255473 |
| chr12 | 114336437 | 114337343 |
| chr12 | 114365973 | 114366367 |
| chr12 | 114372772 | 114373563 |
| chr12 | 114395287 | 114395782 |
| chr12 | 114396110 | 114396385 |
| chr12 | 114402178 | 114402361 |
| chr12 | 117276110 | 117276218 |
| chr12 | 117411785 | 117411916 |
| chr12 | 117520261 | 117520635 |
| chr12 | 117643832 | 117644259 |
| chr12 | 118772772 | 118772904 |
| chr12 | 118816307 | 118816490 |
| chr13 | 3477750   | 3478061   |
| chr13 | 3537379   | 3537924   |
| chr13 | 6557746   | 6558014   |
| chr13 | 6958748   | 6958983   |
| chr13 | 8755098   | 8755187   |
| chr13 | 9093082   | 9094027   |
| chr13 | 9366506   | 9366679   |
| chr13 | 9367162   | 9367345   |
| chr13 | 9424881   | 9425113   |
| chr13 | 9451207   | 9451400   |
| chr13 | 10861374  | 10861563  |
| chr13 | 12681989  | 12682106  |
| chr13 | 13560539  | 13560876  |
| chr13 | 13574290  | 13574628  |
| chr13 | 13582304  | 13582471  |

|       |          |          |
|-------|----------|----------|
| chr13 | 13602229 | 13603225 |
| chr13 | 13603247 | 13604000 |
| chr13 | 13604093 | 13604395 |
| chr13 | 14046942 | 14047211 |
| chr13 | 14059768 | 14060162 |
| chr13 | 14156659 | 14156867 |
| chr13 | 14172515 | 14172682 |
| chr13 | 15554994 | 15555165 |
| chr13 | 17532622 | 17532760 |
| chr13 | 17787288 | 17787618 |
| chr13 | 18050164 | 18050344 |
| chr13 | 20681721 | 20681891 |
| chr13 | 21253273 | 21253390 |
| chr13 | 21259491 | 21259599 |
| chr13 | 21261888 | 21262217 |
| chr13 | 21264228 | 21264339 |
| chr13 | 21272809 | 21273233 |
| chr13 | 21292066 | 21292228 |
| chr13 | 21314452 | 21314579 |
| chr13 | 21325911 | 21326036 |
| chr13 | 21332806 | 21332938 |
| chr13 | 21334437 | 21334564 |
| chr13 | 21346084 | 21346206 |
| chr13 | 21351634 | 21351762 |
| chr13 | 21356477 | 21356575 |
| chr13 | 21367850 | 21367951 |
| chr13 | 21371560 | 21371690 |
| chr13 | 21414680 | 21414805 |
| chr13 | 21802442 | 21802565 |
| chr13 | 21802856 | 21802978 |
| chr13 | 21809897 | 21810031 |
| chr13 | 21814152 | 21814267 |
| chr13 | 21827044 | 21827284 |
| chr13 | 21845943 | 21846199 |
| chr13 | 21903759 | 21903994 |
| chr13 | 21947917 | 21948017 |
| chr13 | 21998973 | 21999108 |
| chr13 | 21999813 | 21999928 |
| chr13 | 22003172 | 22003306 |
| chr13 | 22006562 | 22006872 |
| chr13 | 22011126 | 22011225 |
| chr13 | 22063662 | 22063783 |
| chr13 | 22066925 | 22067028 |



|       |          |          |
|-------|----------|----------|
| chr13 | 22118415 | 22118534 |
| chr13 | 22121083 | 22121230 |
| chr13 | 22135090 | 22135320 |
| chr13 | 23377261 | 23377390 |
| chr13 | 23377512 | 23377633 |
| chr13 | 23390649 | 23390771 |
| chr13 | 23391987 | 23392117 |
| chr13 | 23399491 | 23399619 |
| chr13 | 23409354 | 23409461 |
| chr13 | 23488949 | 23489055 |
| chr13 | 23518421 | 23518505 |
| chr13 | 23523280 | 23523406 |
| chr13 | 23528202 | 23528341 |
| chr13 | 23542517 | 23542619 |
| chr13 | 23555400 | 23555526 |
| chr13 | 23558979 | 23559077 |
| chr13 | 23591955 | 23592063 |
| chr13 | 23609065 | 23609188 |
| chr13 | 23609555 | 23609676 |
| chr13 | 23610033 | 23610146 |
| chr13 | 23610916 | 23611034 |
| chr13 | 23611480 | 23611595 |
| chr13 | 23613736 | 23613868 |
| chr13 | 23622953 | 23623395 |
| chr13 | 23626063 | 23626292 |
| chr13 | 23636351 | 23636594 |
| chr13 | 23646905 | 23647089 |
| chr13 | 23647222 | 23647722 |
| chr13 | 23663275 | 23663391 |
| chr13 | 23673461 | 23673887 |
| chr13 | 23830675 | 23830902 |
| chr13 | 23830970 | 23831448 |
| chr13 | 23838640 | 23838871 |
| chr13 | 23848856 | 23849209 |
| chr13 | 23855540 | 23856441 |
| chr13 | 24892993 | 24894812 |
| chr13 | 24923745 | 24924269 |
| chr13 | 34070092 | 34070321 |
| chr13 | 34161831 | 34162033 |
| chr13 | 34255332 | 34255552 |
| chr13 | 35754005 | 35754188 |
| chr13 | 35833184 | 35834392 |
| chr13 | 36239587 | 36239723 |

|       |          |          |
|-------|----------|----------|
| chr13 | 36355216 | 36355527 |
| chr13 | 36372002 | 36372542 |
| chr13 | 36391685 | 36391940 |
| chr13 | 37918095 | 37919843 |
| chr13 | 37965571 | 37965862 |
| chr13 | 38303602 | 38304151 |
| chr13 | 38310902 | 38312020 |
| chr13 | 40999873 | 41000878 |
| chr13 | 41027915 | 41028301 |
| chr13 | 41028542 | 41028899 |
| chr13 | 41054010 | 41054156 |
| chr13 | 42226393 | 42226653 |
| chr13 | 44828511 | 44830219 |
| chr13 | 44842848 | 44844011 |
| chr13 | 44880364 | 44880746 |
| chr13 | 44886024 | 44886223 |
| chr13 | 44896480 | 44896841 |
| chr13 | 44928544 | 44929089 |
| chr13 | 44935933 | 44936305 |
| chr13 | 44981657 | 44981894 |
| chr13 | 44997464 | 44998850 |
| chr13 | 45016123 | 45016977 |
| chr13 | 46764843 | 46765596 |
| chr13 | 49532652 | 49532823 |
| chr13 | 49779604 | 49779849 |
| chr13 | 49829121 | 49829432 |
| chr13 | 49835458 | 49835720 |
| chr13 | 49925994 | 49926181 |
| chr13 | 51196467 | 51196974 |
| chr13 | 51740692 | 51741161 |
| chr13 | 51743559 | 51743753 |
| chr13 | 53305221 | 53305313 |
| chr13 | 54167335 | 54167803 |
| chr13 | 54605311 | 54605742 |
| chr13 | 54692265 | 54692485 |
| chr13 | 54723223 | 54723574 |
| chr13 | 54764372 | 54764756 |
| chr13 | 55206840 | 55207010 |
| chr13 | 55313040 | 55313859 |
| chr13 | 55321988 | 55322435 |
| chr13 | 55368074 | 55368180 |
| chr13 | 55405064 | 55405225 |
| chr13 | 55424661 | 55424746 |

|       |          |          |
|-------|----------|----------|
| chr13 | 55552418 | 55552822 |
| chr13 | 55553077 | 55553611 |
| chr13 | 55572618 | 55573323 |
| chr13 | 55573366 | 55573950 |
| chr13 | 55694522 | 55694704 |
| chr13 | 55698398 | 55699091 |
| chr13 | 55736438 | 55736798 |
| chr13 | 55794483 | 55795071 |
| chr13 | 55802983 | 55803379 |
| chr13 | 58503987 | 58504820 |
| chr13 | 58584959 | 58585199 |
| chr13 | 59704982 | 59705351 |
| chr13 | 60714330 | 60715318 |
| chr13 | 60749062 | 60749443 |
| chr13 | 60839038 | 60839380 |
| chr13 | 62125255 | 62125417 |
| chr13 | 62146474 | 62146609 |
| chr13 | 62231417 | 62231574 |
| chr13 | 62892864 | 62893015 |
| chr13 | 63287097 | 63287363 |
| chr13 | 63344142 | 63344577 |
| chr13 | 63380036 | 63380549 |
| chr13 | 63394232 | 63394373 |
| chr13 | 63401480 | 63402073 |
| chr13 | 63517703 | 63517801 |
| chr13 | 63916721 | 63916956 |
| chr13 | 64263834 | 64264122 |
| chr13 | 65259580 | 65259742 |
| chr13 | 65404829 | 65405198 |
| chr13 | 65760911 | 65761020 |
| chr13 | 66074598 | 66074695 |
| chr13 | 66533128 | 66533319 |
| chr13 | 66694932 | 66695063 |
| chr13 | 66738982 | 66739166 |
| chr13 | 67274821 | 67275009 |
| chr13 | 69751211 | 69751408 |
| chr13 | 69763789 | 69763909 |
| chr13 | 73005905 | 73006012 |
| chr13 | 73604687 | 73604957 |
| chr13 | 73757509 | 73757771 |
| chr13 | 73901938 | 73902363 |
| chr13 | 73952257 | 73954073 |
| chr13 | 76237744 | 76237999 |

|       |           |           |
|-------|-----------|-----------|
| chr13 | 77848268  | 77848387  |
| chr13 | 77996883  | 77996975  |
| chr13 | 78015692  | 78016067  |
| chr13 | 79594247  | 79594370  |
| chr13 | 81024903  | 81025288  |
| chr13 | 81858081  | 81858227  |
| chr13 | 84362155  | 84362398  |
| chr13 | 84417364  | 84417536  |
| chr13 | 85266669  | 85266846  |
| chr13 | 90229440  | 90229670  |
| chr13 | 90229752  | 90229919  |
| chr13 | 90238570  | 90238760  |
| chr13 | 91062755  | 91063266  |
| chr13 | 91403441  | 91403529  |
| chr13 | 91601392  | 91601745  |
| chr13 | 93381116  | 93381538  |
| chr13 | 93868923  | 93869045  |
| chr13 | 94074252  | 94074569  |
| chr13 | 95233732  | 95233984  |
| chr13 | 95283078  | 95283307  |
| chr13 | 95335658  | 95336084  |
| chr13 | 95608852  | 95609194  |
| chr13 | 95749901  | 95750053  |
| chr13 | 96100424  | 96100738  |
| chr13 | 97312616  | 97313156  |
| chr13 | 97348632  | 97348845  |
| chr13 | 97841042  | 97842442  |
| chr13 | 97851805  | 97852779  |
| chr13 | 97859656  | 97860130  |
| chr13 | 97883950  | 97884277  |
| chr13 | 98253785  | 98254497  |
| chr13 | 98254585  | 98256460  |
| chr13 | 98268751  | 98272320  |
| chr13 | 98278575  | 98282887  |
| chr13 | 100123176 | 100123475 |
| chr13 | 100150647 | 100150813 |
| chr13 | 101374323 | 101374432 |
| chr13 | 104186281 | 104186413 |
| chr13 | 104432003 | 104432135 |
| chr13 | 104969061 | 104969320 |
| chr13 | 107817988 | 107818277 |
| chr13 | 107911779 | 107911886 |
| chr13 | 109119023 | 109119404 |

|       |           |           |
|-------|-----------|-----------|
| chr13 | 109461309 | 109461627 |
| chr13 | 110572469 | 110572606 |
| chr13 | 112376938 | 112377260 |
| chr13 | 112381025 | 112381296 |
| chr13 | 112394075 | 112394246 |
| chr13 | 112476533 | 112477604 |
| chr13 | 113254586 | 113254851 |
| chr13 | 113466108 | 113466431 |
| chr13 | 113591135 | 113592059 |
| chr13 | 113606940 | 113607147 |
| chr13 | 113632723 | 113633230 |
| chr13 | 113847485 | 113847648 |
| chr13 | 114083463 | 114083711 |
| chr13 | 114584320 | 114586117 |
| chr13 | 114591473 | 114592478 |
| chr13 | 114605988 | 114607058 |
| chr13 | 114635243 | 114636251 |
| chr13 | 114640643 | 114641239 |
| chr13 | 114678937 | 114679901 |
| chr13 | 114764087 | 114764367 |
| chr13 | 114859049 | 114860258 |
| chr13 | 114898954 | 114899698 |
| chr13 | 120218115 | 120218469 |
| chr13 | 120260063 | 120260327 |
| chr14 | 3049635   | 3049821   |
| chr14 | 4213799   | 4214026   |
| chr14 | 4214433   | 4214611   |
| chr14 | 8650503   | 8651674   |
| chr14 | 8658333   | 8659386   |
| chr14 | 8700088   | 8700399   |
| chr14 | 8705867   | 8706252   |
| chr14 | 8718417   | 8718643   |
| chr14 | 8726674   | 8726880   |
| chr14 | 8736897   | 8737401   |
| chr14 | 8738005   | 8738545   |
| chr14 | 8745450   | 8745740   |
| chr14 | 8755143   | 8756260   |
| chr14 | 8765165   | 8765612   |
| chr14 | 8774561   | 8774887   |
| chr14 | 8782831   | 8783578   |
| chr14 | 8783669   | 8784098   |
| chr14 | 12386049  | 12386713  |
| chr14 | 12386834  | 12387214  |

|       |          |          |
|-------|----------|----------|
| chr14 | 12387249 | 12388266 |
| chr14 | 12572630 | 12572826 |
| chr14 | 12972482 | 12972625 |
| chr14 | 13061612 | 13061841 |
| chr14 | 13128997 | 13129172 |
| chr14 | 15535515 | 15535905 |
| chr14 | 15542586 | 15542768 |
| chr14 | 15549521 | 15549634 |
| chr14 | 15561276 | 15561481 |
| chr14 | 17197753 | 17198159 |
| chr14 | 20570430 | 20570799 |
| chr14 | 20571313 | 20571777 |
| chr14 | 20578919 | 20579124 |
| chr14 | 20587435 | 20588268 |
| chr14 | 20600340 | 20600630 |
| chr14 | 20604537 | 20604831 |
| chr14 | 20617565 | 20617922 |
| chr14 | 20622747 | 20623571 |
| chr14 | 20630172 | 20630464 |
| chr14 | 20630470 | 20631030 |
| chr14 | 21118742 | 21118867 |
| chr14 | 21175059 | 21175291 |
| chr14 | 21187495 | 21187776 |
| chr14 | 21200150 | 21200289 |
| chr14 | 21532803 | 21533900 |
| chr14 | 21540551 | 21540931 |
| chr14 | 21748645 | 21748792 |
| chr14 | 21749241 | 21749604 |
| chr14 | 22069862 | 22070027 |
| chr14 | 22300705 | 22302872 |
| chr14 | 22308100 | 22309010 |
| chr14 | 22317650 | 22321144 |
| chr14 | 22337270 | 22338379 |
| chr14 | 22383554 | 22384017 |
| chr14 | 22386970 | 22387948 |
| chr14 | 22410570 | 22410690 |
| chr14 | 22443735 | 22444868 |
| chr14 | 22444904 | 22445680 |
| chr14 | 22457918 | 22458187 |
| chr14 | 22465405 | 22466351 |
| chr14 | 22468795 | 22469202 |
| chr14 | 22487600 | 22489138 |
| chr14 | 22489273 | 22489785 |

|       |          |          |
|-------|----------|----------|
| chr14 | 22569804 | 22570044 |
| chr14 | 22631939 | 22632108 |
| chr14 | 22662270 | 22662509 |
| chr14 | 23170282 | 23170497 |
| chr14 | 25312706 | 25313157 |
| chr14 | 26426925 | 26427820 |
| chr14 | 27457586 | 27457975 |
| chr14 | 28149323 | 28149699 |
| chr14 | 28242025 | 28242383 |
| chr14 | 28284841 | 28285060 |
| chr14 | 28436830 | 28437017 |
| chr14 | 28467253 | 28467614 |
| chr14 | 28959005 | 28959187 |
| chr14 | 31292915 | 31293153 |
| chr14 | 31362338 | 31362595 |
| chr14 | 31362712 | 31363407 |
| chr14 | 31386511 | 31386817 |
| chr14 | 31467618 | 31467872 |
| chr14 | 31483393 | 31483635 |
| chr14 | 31638676 | 31639787 |
| chr14 | 31645280 | 31645615 |
| chr14 | 31814932 | 31815316 |
| chr14 | 31832403 | 31832831 |
| chr14 | 31932449 | 31932538 |
| chr14 | 31944246 | 31944802 |
| chr14 | 32015555 | 32015650 |
| chr14 | 32321595 | 32321701 |
| chr14 | 32973284 | 32973570 |
| chr14 | 33041538 | 33042065 |
| chr14 | 33047734 | 33047983 |
| chr14 | 33143120 | 33143346 |
| chr14 | 33155330 | 33156130 |
| chr14 | 33338915 | 33339083 |
| chr14 | 33351881 | 33352116 |
| chr14 | 35123881 | 35124384 |
| chr14 | 35124398 | 35124777 |
| chr14 | 35157463 | 35157772 |
| chr14 | 35202925 | 35203523 |
| chr14 | 35316072 | 35316199 |
| chr14 | 35410995 | 35411215 |
| chr14 | 35487106 | 35488066 |
| chr14 | 35514025 | 35514119 |
| chr14 | 35930401 | 35930550 |

|       |          |          |
|-------|----------|----------|
| chr14 | 41789358 | 41789557 |
| chr14 | 41794804 | 41794909 |
| chr14 | 42060974 | 42061111 |
| chr14 | 45839843 | 45840242 |
| chr14 | 45962029 | 45962281 |
| chr14 | 46432480 | 46432578 |
| chr14 | 47917948 | 47918457 |
| chr14 | 47930163 | 47930884 |
| chr14 | 47939431 | 47939710 |
| chr14 | 47939711 | 47940148 |
| chr14 | 48092254 | 48092912 |
| chr14 | 48269464 | 48269773 |
| chr14 | 48741185 | 48741450 |
| chr14 | 48747844 | 48748161 |
| chr14 | 48798306 | 48798450 |
| chr14 | 48810785 | 48810960 |
| chr14 | 49066205 | 49066374 |
| chr14 | 49791992 | 49792572 |
| chr14 | 50682070 | 50682250 |
| chr14 | 51581311 | 51581406 |
| chr14 | 51683553 | 51683689 |
| chr14 | 51708320 | 51708462 |
| chr14 | 51709156 | 51709306 |
| chr14 | 51710321 | 51710436 |
| chr14 | 52688991 | 52689087 |
| chr14 | 52962468 | 52962577 |
| chr14 | 55059571 | 55059762 |
| chr14 | 55136529 | 55136659 |
| chr14 | 55200012 | 55200139 |
| chr14 | 55261671 | 55261856 |
| chr14 | 55512938 | 55513525 |
| chr14 | 55515766 | 55517762 |
| chr14 | 56163179 | 56163413 |
| chr14 | 57031579 | 57032055 |
| chr14 | 57032119 | 57032543 |
| chr14 | 57072058 | 57072298 |
| chr14 | 57093443 | 57093693 |
| chr14 | 57108522 | 57109069 |
| chr14 | 57110336 | 57110752 |
| chr14 | 57287990 | 57288202 |
| chr14 | 58316637 | 58316815 |
| chr14 | 58445089 | 58445246 |
| chr14 | 59277517 | 59277617 |



|       |          |          |
|-------|----------|----------|
| chr14 | 59839765 | 59839868 |
| chr14 | 60084454 | 60084731 |
| chr14 | 60101163 | 60101376 |
| chr14 | 61410559 | 61410842 |
| chr14 | 61422734 | 61423212 |
| chr14 | 61793750 | 61794077 |
| chr14 | 62162472 | 62162578 |
| chr14 | 62967970 | 62968199 |
| chr14 | 63718371 | 63718490 |
| chr14 | 63752045 | 63752365 |
| chr14 | 63761042 | 63761897 |
| chr14 | 64224974 | 64227934 |
| chr14 | 64246392 | 64246845 |
| chr14 | 65307376 | 65307914 |
| chr14 | 65322240 | 65322655 |
| chr14 | 65331250 | 65331560 |
| chr14 | 65372753 | 65372940 |
| chr14 | 65720356 | 65720537 |
| chr14 | 65977462 | 65977890 |
| chr14 | 66593709 | 66593831 |
| chr14 | 68334216 | 68334566 |
| chr14 | 68743083 | 68743324 |
| chr14 | 69955228 | 69955736 |
| chr14 | 70008996 | 70009270 |
| chr14 | 70093648 | 70093960 |
| chr14 | 70094165 | 70094342 |
| chr14 | 75684259 | 75684503 |
| chr14 | 75739983 | 75740420 |
| chr14 | 76244859 | 76245294 |
| chr14 | 76247580 | 76247939 |
| chr14 | 76552570 | 76552703 |
| chr14 | 76814473 | 76816438 |
| chr14 | 76904325 | 76904728 |
| chr14 | 76919344 | 76920263 |
| chr14 | 77070122 | 77071974 |
| chr14 | 77072152 | 77074493 |
| chr14 | 79325701 | 79326030 |
| chr14 | 79340412 | 79340711 |
| chr14 | 79450602 | 79450907 |
| chr14 | 79881471 | 79882072 |
| chr14 | 96844198 | 96844327 |
| chr14 | 96988046 | 96988223 |
| chr14 | 99516047 | 99516621 |

|       |           |           |
|-------|-----------|-----------|
| chr14 | 99529493  | 99529852  |
| chr14 | 99617314  | 99617410  |
| chr14 | 99697903  | 99698906  |
| chr14 | 99700750  | 99701598  |
| chr14 | 102053436 | 102053898 |
| chr14 | 102057888 | 102057981 |
| chr14 | 104088812 | 104089021 |
| chr14 | 105649255 | 105649350 |
| chr14 | 106505909 | 106506298 |
| chr14 | 106506333 | 106506893 |
| chr14 | 115440193 | 115442044 |
| chr14 | 117328468 | 117328648 |
| chr14 | 118536546 | 118536837 |
| chr14 | 118752606 | 118752695 |
| chr14 | 119586482 | 119586669 |
| chr14 | 120756586 | 120756696 |
| chr14 | 120801544 | 120802005 |
| chr14 | 121310363 | 121311190 |
| chr14 | 121342990 | 121343208 |
| chr14 | 121435134 | 121435629 |
| chr14 | 121525054 | 121525243 |
| chr14 | 122277828 | 122278181 |
| chr14 | 122375053 | 122375250 |
| chr14 | 122506319 | 122506747 |
| chr14 | 122526867 | 122527177 |
| chr14 | 122580981 | 122581353 |
| chr14 | 122583122 | 122583687 |
| chr14 | 122634488 | 122634812 |
| chr14 | 122719382 | 122719618 |
| chr14 | 122864132 | 122864564 |
| chr14 | 122875075 | 122875454 |
| chr14 | 123093585 | 123093737 |
| chr15 | 3994444   | 3994576   |
| chr15 | 5068251   | 5068655   |
| chr15 | 6344174   | 6344412   |
| chr15 | 6686574   | 6686782   |
| chr15 | 6716231   | 6716568   |
| chr15 | 7079567   | 7079945   |
| chr15 | 7098517   | 7098972   |
| chr15 | 7136115   | 7136376   |
| chr15 | 7142999   | 7143593   |
| chr15 | 8059330   | 8059546   |
| chr15 | 8109043   | 8109513   |

|       |          |          |
|-------|----------|----------|
| chr15 | 8114629  | 8114985  |
| chr15 | 8119053  | 8119365  |
| chr15 | 8169981  | 8170135  |
| chr15 | 8178020  | 8178258  |
| chr15 | 8206179  | 8206447  |
| chr15 | 9001054  | 9001750  |
| chr15 | 9070343  | 9070444  |
| chr15 | 12047587 | 12048863 |
| chr15 | 12094580 | 12094705 |
| chr15 | 12134832 | 12135620 |
| chr15 | 12141231 | 12141716 |
| chr15 | 12144614 | 12145159 |
| chr15 | 12157675 | 12158444 |
| chr15 | 12165394 | 12165614 |
| chr15 | 12200219 | 12200719 |
| chr15 | 12251654 | 12252199 |
| chr15 | 12763577 | 12764271 |
| chr15 | 21044133 | 21044255 |
| chr15 | 25570825 | 25571462 |
| chr15 | 25685698 | 25686217 |
| chr15 | 25701461 | 25702394 |
| chr15 | 27397297 | 27397547 |
| chr15 | 31539345 | 31539541 |
| chr15 | 33991038 | 33991324 |
| chr15 | 34012461 | 34013282 |
| chr15 | 34072713 | 34073198 |
| chr15 | 34192598 | 34192783 |
| chr15 | 35301339 | 35301564 |
| chr15 | 35711222 | 35711409 |
| chr15 | 36131620 | 36131775 |
| chr15 | 36722880 | 36723137 |
| chr15 | 37291596 | 37292330 |
| chr15 | 39029368 | 39029794 |
| chr15 | 39030096 | 39030450 |
| chr15 | 44264180 | 44264271 |
| chr15 | 44450979 | 44451153 |
| chr15 | 48382852 | 48382947 |
| chr15 | 51709151 | 51709352 |
| chr15 | 52544013 | 52544217 |
| chr15 | 54967648 | 54967824 |
| chr15 | 55013348 | 55013730 |
| chr15 | 55715302 | 55715587 |
| chr15 | 57766392 | 57766651 |

|       |          |          |
|-------|----------|----------|
| chr15 | 57791301 | 57791684 |
| chr15 | 57978168 | 57978378 |
| chr15 | 58765350 | 58765532 |
| chr15 | 59146632 | 59146914 |
| chr15 | 59162288 | 59162564 |
| chr15 | 59213353 | 59213514 |
| chr15 | 59287053 | 59287409 |
| chr15 | 59321457 | 59322085 |
| chr15 | 59363555 | 59363999 |
| chr15 | 61895318 | 61895804 |
| chr15 | 62024054 | 62024403 |
| chr15 | 62031343 | 62031892 |
| chr15 | 62049544 | 62051469 |
| chr15 | 62071508 | 62072131 |
| chr15 | 63857532 | 63857626 |
| chr15 | 64962097 | 64962186 |
| chr15 | 65622592 | 65622759 |
| chr15 | 71624655 | 71624844 |
| chr15 | 72921038 | 72921327 |
| chr15 | 73504395 | 73504598 |
| chr15 | 73581585 | 73582886 |
| chr15 | 74788946 | 74789379 |
| chr15 | 74789608 | 74789773 |
| chr15 | 74917218 | 74917507 |
| chr15 | 75540329 | 75540512 |
| chr15 | 76173951 | 76174988 |
| chr15 | 76233456 | 76234608 |
| chr15 | 76257969 | 76258323 |
| chr15 | 76316106 | 76316357 |
| chr15 | 76370742 | 76371271 |
| chr15 | 76520655 | 76521603 |
| chr15 | 76710465 | 76710669 |
| chr15 | 76734517 | 76735604 |
| chr15 | 76735944 | 76736919 |
| chr15 | 76898220 | 76898357 |
| chr15 | 77839175 | 77839616 |
| chr15 | 77881648 | 77882049 |
| chr15 | 77889151 | 77890069 |
| chr15 | 78267459 | 78268610 |
| chr15 | 78741741 | 78742409 |
| chr15 | 78798367 | 78798938 |
| chr15 | 78835628 | 78835984 |
| chr15 | 78858951 | 78859114 |

|       |          |          |
|-------|----------|----------|
| chr15 | 78963524 | 78963955 |
| chr15 | 78971788 | 78972029 |
| chr15 | 79352104 | 79352384 |
| chr15 | 79536644 | 79537111 |
| chr15 | 79585132 | 79585404 |
| chr15 | 79678482 | 79678878 |
| chr15 | 79722945 | 79723276 |
| chr15 | 79737424 | 79737849 |
| chr15 | 79842782 | 79844083 |
| chr15 | 79844089 | 79845837 |
| chr15 | 79927816 | 79928159 |
| chr15 | 79965017 | 79965676 |
| chr15 | 80080123 | 80081029 |
| chr15 | 80087436 | 80087631 |
| chr15 | 80660637 | 80660972 |
| chr15 | 80720471 | 80720669 |
| chr15 | 80760499 | 80760807 |
| chr15 | 80837306 | 80837843 |
| chr15 | 80840241 | 80840709 |
| chr15 | 80870091 | 80870194 |
| chr15 | 81283729 | 81284005 |
| chr15 | 81415834 | 81417292 |
| chr15 | 81457489 | 81458043 |
| chr15 | 81480885 | 81481380 |
| chr15 | 81498275 | 81498603 |
| chr15 | 81576400 | 81576768 |
| chr15 | 81586035 | 81586615 |
| chr15 | 81624499 | 81624981 |
| chr15 | 81703138 | 81703420 |
| chr15 | 81977676 | 81978861 |
| chr15 | 82000191 | 82000610 |
| chr15 | 82001510 | 82001779 |
| chr15 | 82034168 | 82035913 |
| chr15 | 82980072 | 82980280 |
| chr15 | 84034691 | 84035334 |
| chr15 | 84074400 | 84074753 |
| chr15 | 84129514 | 84130236 |
| chr15 | 84131880 | 84132417 |
| chr15 | 84144227 | 84145434 |
| chr15 | 84145542 | 84146080 |
| chr15 | 84164247 | 84164475 |
| chr15 | 84173092 | 84173355 |
| chr15 | 85036520 | 85036861 |

|       |          |          |
|-------|----------|----------|
| chr15 | 85166719 | 85167474 |
| chr15 | 85228908 | 85229409 |
| chr15 | 85269427 | 85270004 |
| chr15 | 85501550 | 85501847 |
| chr15 | 85577910 | 85578044 |
| chr15 | 85692882 | 85693566 |
| chr15 | 85705877 | 85706845 |
| chr15 | 86232431 | 86232660 |
| chr15 | 88582482 | 88582829 |
| chr15 | 88592112 | 88592223 |
| chr15 | 88606088 | 88606474 |
| chr15 | 88665728 | 88665871 |
| chr15 | 88692869 | 88695489 |
| chr15 | 88695496 | 88696118 |
| chr15 | 88849649 | 88849852 |
| chr15 | 89186202 | 89186638 |
| chr15 | 90054740 | 90055028 |
| chr15 | 92190720 | 92191203 |
| chr15 | 93064791 | 93065071 |
| chr15 | 94503974 | 94504172 |
| chr15 | 95650204 | 95650376 |
| chr15 | 95725386 | 95725882 |
| chr15 | 96117409 | 96117711 |
| chr15 | 96117860 | 96118390 |
| chr15 | 96133810 | 96134144 |
| chr15 | 96143900 | 96144059 |
| chr15 | 96212815 | 96213158 |
| chr15 | 96473093 | 96473491 |
| chr15 | 97214154 | 97214652 |
| chr15 | 97621567 | 97622136 |
| chr15 | 97826319 | 97826629 |
| chr15 | 97946552 | 97946804 |
| chr15 | 98087261 | 98087515 |
| chr15 | 98464916 | 98465740 |
| chr15 | 98638652 | 98638896 |
| chr15 | 98913180 | 98913546 |
| chr15 | 98957029 | 98957571 |
| chr15 | 99017591 | 99017858 |
| chr15 | 99125758 | 99125996 |
| chr15 | 99127018 | 99127606 |
| chr15 | 99140198 | 99140479 |
| chr15 | 99223726 | 99223987 |
| chr15 | 99238803 | 99240275 |

|       |           |           |
|-------|-----------|-----------|
| chr15 | 99803285  | 99803707  |
| chr15 | 99845112  | 99846088  |
| chr15 | 99869135  | 99869614  |
| chr15 | 99896276  | 99896548  |
| chr15 | 99904035  | 99904231  |
| chr15 | 100010161 | 100010397 |
| chr15 | 100067581 | 100068188 |
| chr15 | 100632240 | 100632599 |
| chr15 | 100633152 | 100633362 |
| chr15 | 100644292 | 100644576 |
| chr15 | 100774832 | 100775172 |
| chr15 | 101004501 | 101005676 |
| chr15 | 101055206 | 101055367 |
| chr15 | 101141831 | 101141923 |
| chr15 | 101904300 | 101905026 |
| chr15 | 101907249 | 101907463 |
| chr15 | 101918986 | 101919609 |
| chr15 | 101926141 | 101926904 |
| chr15 | 102126744 | 102127305 |
| chr15 | 102128433 | 102129451 |
| chr15 | 102145759 | 102146182 |
| chr15 | 102221728 | 102221869 |
| chr15 | 102238638 | 102239204 |
| chr15 | 102290778 | 102291498 |
| chr15 | 102300649 | 102301993 |
| chr15 | 102306353 | 102306656 |
| chr15 | 102316311 | 102316946 |
| chr15 | 102324103 | 102324429 |
| chr15 | 102351008 | 102351504 |
| chr15 | 102973104 | 102973336 |
| chr15 | 103129524 | 103130216 |
| chr16 | 3539906   | 3540115   |
| chr16 | 3730410   | 3731091   |
| chr16 | 3732129   | 3732250   |
| chr16 | 3771591   | 3772239   |
| chr16 | 3934746   | 3935261   |
| chr16 | 4595719   | 4596113   |
| chr16 | 4613498   | 4614064   |
| chr16 | 4914715   | 4915135   |
| chr16 | 8478673   | 8478937   |
| chr16 | 8481667   | 8482120   |
| chr16 | 8517081   | 8517222   |
| chr16 | 8642919   | 8643495   |

|       |          |          |
|-------|----------|----------|
| chr16 | 8830244  | 8830660  |
| chr16 | 8830694  | 8831293  |
| chr16 | 8847262  | 8847815  |
| chr16 | 9356553  | 9356796  |
| chr16 | 10170348 | 10170529 |
| chr16 | 10228701 | 10228936 |
| chr16 | 10413795 | 10414168 |
| chr16 | 10832732 | 10832826 |
| chr16 | 10835170 | 10835440 |
| chr16 | 11323218 | 11323324 |
| chr16 | 11369312 | 11369896 |
| chr16 | 11415922 | 11416120 |
| chr16 | 13287928 | 13288049 |
| chr16 | 13300005 | 13300450 |
| chr16 | 13303389 | 13303487 |
| chr16 | 13437411 | 13437626 |
| chr16 | 13553962 | 13554055 |
| chr16 | 13813558 | 13813963 |
| chr16 | 14053800 | 14053949 |
| chr16 | 14361704 | 14362252 |
| chr16 | 15645120 | 15645470 |
| chr16 | 15722658 | 15722859 |
| chr16 | 16870970 | 16871357 |
| chr16 | 16909406 | 16910744 |
| chr16 | 16926171 | 16927166 |
| chr16 | 16983564 | 16984213 |
| chr16 | 17043764 | 17043951 |
| chr16 | 17278043 | 17278722 |
| chr16 | 17632522 | 17632757 |
| chr16 | 17759788 | 17760304 |
| chr16 | 17770338 | 17770699 |
| chr16 | 18066827 | 18067132 |
| chr16 | 18405655 | 18406363 |
| chr16 | 18518317 | 18518463 |
| chr16 | 18836611 | 18836856 |
| chr16 | 18877312 | 18878158 |
| chr16 | 18906914 | 18907229 |
| chr16 | 18912561 | 18912813 |
| chr16 | 20141156 | 20141599 |
| chr16 | 20192214 | 20192797 |
| chr16 | 20207561 | 20207920 |
| chr16 | 20230828 | 20231387 |
| chr16 | 20517304 | 20517799 |



|       |          |          |
|-------|----------|----------|
| chr16 | 20672863 | 20674467 |
| chr16 | 20684263 | 20684629 |
| chr16 | 20692350 | 20692994 |
| chr16 | 20733013 | 20733247 |
| chr16 | 20804979 | 20805072 |
| chr16 | 20888720 | 20888946 |
| chr16 | 21204932 | 21205395 |
| chr16 | 21211044 | 21211717 |
| chr16 | 21216721 | 21217145 |
| chr16 | 21571812 | 21571914 |
| chr16 | 22009554 | 22009835 |
| chr16 | 22010334 | 22010446 |
| chr16 | 22047694 | 22047910 |
| chr16 | 22224347 | 22224448 |
| chr16 | 23050699 | 23050790 |
| chr16 | 23107832 | 23109381 |
| chr16 | 23109971 | 23110797 |
| chr16 | 23110816 | 23112686 |
| chr16 | 24486764 | 24487861 |
| chr16 | 24549256 | 24549381 |
| chr16 | 24682392 | 24682506 |
| chr16 | 24710809 | 24711204 |
| chr16 | 29504713 | 29504799 |
| chr16 | 30600276 | 30600852 |
| chr16 | 30814246 | 30814369 |
| chr16 | 31757533 | 31757910 |
| chr16 | 31798284 | 31798567 |
| chr16 | 32290648 | 32290762 |
| chr16 | 32332314 | 32333182 |
| chr16 | 32410596 | 32410698 |
| chr16 | 32609117 | 32609475 |
| chr16 | 32631021 | 32631497 |
| chr16 | 32631975 | 32632250 |
| chr16 | 32632309 | 32632695 |
| chr16 | 32643989 | 32645498 |
| chr16 | 32667165 | 32667808 |
| chr16 | 32677984 | 32679374 |
| chr16 | 32914212 | 32914447 |
| chr16 | 33002019 | 33002157 |
| chr16 | 33047699 | 33047823 |
| chr16 | 33056546 | 33056930 |
| chr16 | 33341046 | 33341239 |
| chr16 | 33381012 | 33381698 |

|       |          |          |
|-------|----------|----------|
| chr16 | 33394913 | 33395189 |
| chr16 | 33483381 | 33483755 |
| chr16 | 33618531 | 33618746 |
| chr16 | 33829763 | 33830196 |
| chr16 | 33885045 | 33885237 |
| chr16 | 35033242 | 35033808 |
| chr16 | 35587021 | 35587431 |
| chr16 | 35770520 | 35770883 |
| chr16 | 35780872 | 35781106 |
| chr16 | 35802060 | 35802840 |
| chr16 | 35983447 | 35983903 |
| chr16 | 35983993 | 35984242 |
| chr16 | 36075359 | 36076092 |
| chr16 | 36079096 | 36079471 |
| chr16 | 36089036 | 36089973 |
| chr16 | 36875147 | 36875824 |
| chr16 | 36932073 | 36932307 |
| chr16 | 37018610 | 37018770 |
| chr16 | 37083164 | 37083464 |
| chr16 | 37835663 | 37836069 |
| chr16 | 38089286 | 38090237 |
| chr16 | 38158091 | 38158384 |
| chr16 | 38562818 | 38563424 |
| chr16 | 38569437 | 38569854 |
| chr16 | 38572026 | 38572247 |
| chr16 | 38584953 | 38585651 |
| chr16 | 41217858 | 41217994 |
| chr16 | 42876093 | 42876542 |
| chr16 | 42928900 | 42929092 |
| chr16 | 43182616 | 43182710 |
| chr16 | 44139906 | 44140778 |
| chr16 | 44144647 | 44144979 |
| chr16 | 44161374 | 44161709 |
| chr16 | 44174155 | 44174329 |
| chr16 | 47250684 | 47250774 |
| chr16 | 48289869 | 48290601 |
| chr16 | 48440133 | 48440451 |
| chr16 | 48488971 | 48489065 |
| chr16 | 48504017 | 48504233 |
| chr16 | 48516205 | 48516560 |
| chr16 | 48521460 | 48521925 |
| chr16 | 49699314 | 49699612 |
| chr16 | 50487402 | 50487509 |

|       |          |          |
|-------|----------|----------|
| chr16 | 50529033 | 50529537 |
| chr16 | 50540311 | 50540622 |
| chr16 | 52049057 | 52049171 |
| chr16 | 52058541 | 52058678 |
| chr16 | 52190680 | 52190941 |
| chr16 | 55974537 | 55975091 |
| chr16 | 56107219 | 56107336 |
| chr16 | 57121780 | 57122440 |
| chr16 | 57284329 | 57284556 |
| chr16 | 57303948 | 57304371 |
| chr16 | 58728091 | 58728285 |
| chr16 | 62880753 | 62881016 |
| chr16 | 64851834 | 64852497 |
| chr16 | 72663802 | 72664227 |
| chr16 | 72770648 | 72770738 |
| chr16 | 72784169 | 72784256 |
| chr16 | 72824738 | 72825014 |
| chr16 | 78624989 | 78625103 |
| chr16 | 82543472 | 82543613 |
| chr16 | 84774231 | 84775010 |
| chr16 | 84775139 | 84775547 |
| chr16 | 84786535 | 84787023 |
| chr16 | 84811892 | 84812181 |
| chr16 | 84820663 | 84820943 |
| chr16 | 84835578 | 84836126 |
| chr16 | 90220997 | 90221363 |
| chr16 | 90423694 | 90423998 |
| chr16 | 90497440 | 90497676 |
| chr16 | 91496752 | 91497001 |
| chr16 | 91534828 | 91535001 |
| chr16 | 91648242 | 91648785 |
| chr16 | 91655320 | 91656896 |
| chr16 | 91658483 | 91659087 |
| chr16 | 91729634 | 91730555 |
| chr16 | 91740504 | 91741402 |
| chr16 | 91741429 | 91741872 |
| chr16 | 92058566 | 92059500 |
| chr16 | 93686949 | 93687045 |
| chr16 | 93890950 | 93891488 |
| chr16 | 93903378 | 93903700 |
| chr16 | 94592406 | 94593223 |
| chr16 | 94690081 | 94690325 |
| chr16 | 94791322 | 94792764 |

|       |          |          |
|-------|----------|----------|
| chr16 | 94800360 | 94800762 |
| chr16 | 94837362 | 94837687 |
| chr16 | 94848785 | 94849183 |
| chr16 | 94860691 | 94861280 |
| chr16 | 94901575 | 94901875 |
| chr16 | 96303424 | 96303642 |
| chr16 | 96303992 | 96304476 |
| chr16 | 96381128 | 96381480 |
| chr16 | 98236465 | 98236602 |
| chr17 | 3114991  | 3115400  |
| chr17 | 3160816  | 3160985  |
| chr17 | 3188674  | 3188789  |
| chr17 | 3225263  | 3225532  |
| chr17 | 3379807  | 3379901  |
| chr17 | 4995928  | 4996926  |
| chr17 | 5014169  | 5014557  |
| chr17 | 5027861  | 5028124  |
| chr17 | 5136456  | 5136839  |
| chr17 | 5519107  | 5519558  |
| chr17 | 5556129  | 5556335  |
| chr17 | 6107238  | 6107730  |
| chr17 | 7495994  | 7496216  |
| chr17 | 8360458  | 8360565  |
| chr17 | 8371622  | 8372048  |
| chr17 | 8478941  | 8479130  |
| chr17 | 8504181  | 8504427  |
| chr17 | 13112307 | 13112836 |
| chr17 | 13115654 | 13115834 |
| chr17 | 13201127 | 13201313 |
| chr17 | 13897536 | 13898844 |
| chr17 | 13962808 | 13963020 |
| chr17 | 13973042 | 13973146 |
| chr17 | 13999402 | 13999502 |
| chr17 | 14033268 | 14033529 |
| chr17 | 15080254 | 15080613 |
| chr17 | 15098243 | 15098934 |
| chr17 | 15129438 | 15129981 |
| chr17 | 15137396 | 15137576 |
| chr17 | 15146854 | 15147086 |
| chr17 | 15160806 | 15161256 |
| chr17 | 15178219 | 15178472 |
| chr17 | 15191780 | 15192104 |
| chr17 | 15841979 | 15842328 |

|       |          |          |
|-------|----------|----------|
| chr17 | 15845943 | 15846054 |
| chr17 | 17089709 | 17089917 |
| chr17 | 17155187 | 17155422 |
| chr17 | 17165082 | 17165320 |
| chr17 | 17274204 | 17274397 |
| chr17 | 17336889 | 17337116 |
| chr17 | 17378186 | 17378549 |
| chr17 | 17440328 | 17440653 |
| chr17 | 17529110 | 17529328 |
| chr17 | 17535201 | 17535298 |
| chr17 | 17965718 | 17966023 |
| chr17 | 21102456 | 21102687 |
| chr17 | 22564386 | 22564737 |
| chr17 | 23013583 | 23013890 |
| chr17 | 23670919 | 23671043 |
| chr17 | 23677878 | 23678006 |
| chr17 | 23684321 | 23684442 |
| chr17 | 23742507 | 23742971 |
| chr17 | 23818837 | 23819389 |
| chr17 | 23868493 | 23868629 |
| chr17 | 23869419 | 23869982 |
| chr17 | 23940175 | 23941091 |
| chr17 | 23943792 | 23944355 |
| chr17 | 23951974 | 23954869 |
| chr17 | 23954920 | 23958777 |
| chr17 | 23959264 | 23960912 |
| chr17 | 24489316 | 24489597 |
| chr17 | 24551661 | 24552007 |
| chr17 | 24665405 | 24665553 |
| chr17 | 24711360 | 24712764 |
| chr17 | 24806643 | 24807117 |
| chr17 | 24816428 | 24817281 |
| chr17 | 24857056 | 24857572 |
| chr17 | 24857690 | 24857976 |
| chr17 | 25297436 | 25297742 |
| chr17 | 25867909 | 25868231 |
| chr17 | 26012030 | 26012153 |
| chr17 | 26275579 | 26275961 |
| chr17 | 26292981 | 26293123 |
| chr17 | 26305256 | 26305594 |
| chr17 | 26332151 | 26332696 |
| chr17 | 26360446 | 26360646 |
| chr17 | 26389886 | 26390580 |

|       |          |          |
|-------|----------|----------|
| chr17 | 26399729 | 26399874 |
| chr17 | 26406589 | 26406978 |
| chr17 | 26407068 | 26407432 |
| chr17 | 26698510 | 26699235 |
| chr17 | 26700112 | 26701227 |
| chr17 | 26721329 | 26721997 |
| chr17 | 26778980 | 26780317 |
| chr17 | 26781382 | 26782704 |
| chr17 | 26790671 | 26790780 |
| chr17 | 26792510 | 26793364 |
| chr17 | 26968650 | 26968815 |
| chr17 | 27069608 | 27070439 |
| chr17 | 27074211 | 27074828 |
| chr17 | 27078021 | 27078436 |
| chr17 | 27096250 | 27096568 |
| chr17 | 27166165 | 27166869 |
| chr17 | 27194268 | 27194694 |
| chr17 | 27258555 | 27259095 |
| chr17 | 27693568 | 27694908 |
| chr17 | 27985346 | 27985741 |
| chr17 | 27993663 | 27994231 |
| chr17 | 28023297 | 28023777 |
| chr17 | 28046246 | 28047061 |
| chr17 | 28115449 | 28115753 |
| chr17 | 28338730 | 28339064 |
| chr17 | 28465527 | 28467108 |
| chr17 | 28828320 | 28828803 |
| chr17 | 28834282 | 28834475 |
| chr17 | 28906616 | 28907049 |
| chr17 | 28937596 | 28938825 |
| chr17 | 29169622 | 29170153 |
| chr17 | 29170312 | 29171283 |
| chr17 | 29176403 | 29176960 |
| chr17 | 29231062 | 29231831 |
| chr17 | 29423351 | 29423800 |
| chr17 | 29432565 | 29432796 |
| chr17 | 29627650 | 29629031 |
| chr17 | 29687869 | 29688068 |
| chr17 | 29717203 | 29717291 |
| chr17 | 29718160 | 29718576 |
| chr17 | 29733573 | 29734003 |
| chr17 | 29751916 | 29752028 |
| chr17 | 29797670 | 29798421 |

|       |          |          |
|-------|----------|----------|
| chr17 | 29822536 | 29822926 |
| chr17 | 30142024 | 30142470 |
| chr17 | 30192107 | 30192514 |
| chr17 | 30217201 | 30217409 |
| chr17 | 30585905 | 30586094 |
| chr17 | 30773513 | 30773637 |
| chr17 | 31038859 | 31039972 |
| chr17 | 31042662 | 31043452 |
| chr17 | 31075316 | 31075730 |
| chr17 | 31657128 | 31657324 |
| chr17 | 31701835 | 31702583 |
| chr17 | 32174660 | 32175933 |
| chr17 | 32458389 | 32458673 |
| chr17 | 33102934 | 33103229 |
| chr17 | 33133576 | 33133785 |
| chr17 | 33687127 | 33687451 |
| chr17 | 33768036 | 33768388 |
| chr17 | 33954080 | 33955539 |
| chr17 | 33969135 | 33969404 |
| chr17 | 34066529 | 34067028 |
| chr17 | 34067070 | 34067782 |
| chr17 | 34068194 | 34068737 |
| chr17 | 34069319 | 34070069 |
| chr17 | 34081781 | 34082054 |
| chr17 | 34096640 | 34096724 |
| chr17 | 34168816 | 34170130 |
| chr17 | 34256568 | 34256887 |
| chr17 | 34257009 | 34257444 |
| chr17 | 34683999 | 34684287 |
| chr17 | 34719415 | 34719761 |
| chr17 | 34729195 | 34729694 |
| chr17 | 34742825 | 34743644 |
| chr17 | 34749278 | 34750393 |
| chr17 | 34791209 | 34791991 |
| chr17 | 34987403 | 34987697 |
| chr17 | 35031926 | 35032413 |
| chr17 | 35118804 | 35119026 |
| chr17 | 35138020 | 35138812 |
| chr17 | 35237053 | 35237348 |
| chr17 | 35280121 | 35280775 |
| chr17 | 35378746 | 35379381 |
| chr17 | 35379485 | 35380506 |
| chr17 | 35384033 | 35384422 |

|       |          |          |
|-------|----------|----------|
| chr17 | 35385752 | 35388402 |
| chr17 | 35642953 | 35643594 |
| chr17 | 35663687 | 35664009 |
| chr17 | 35978650 | 35978984 |
| chr17 | 35989352 | 35990860 |
| chr17 | 35994889 | 35995791 |
| chr17 | 36053934 | 36054453 |
| chr17 | 36067286 | 36067845 |
| chr17 | 36411729 | 36411998 |
| chr17 | 37139445 | 37141495 |
| chr17 | 37146376 | 37147574 |
| chr17 | 37182806 | 37184036 |
| chr17 | 37185344 | 37185963 |
| chr17 | 37186014 | 37188281 |
| chr17 | 37203918 | 37205056 |
| chr17 | 37209325 | 37210591 |
| chr17 | 37210730 | 37211253 |
| chr17 | 37218642 | 37218995 |
| chr17 | 38134454 | 38134689 |
| chr17 | 38144356 | 38144564 |
| chr17 | 39979934 | 39983356 |
| chr17 | 39985146 | 39985828 |
| chr17 | 45142098 | 45142284 |
| chr17 | 45167939 | 45168204 |
| chr17 | 45408908 | 45408993 |
| chr17 | 45703689 | 45704184 |
| chr17 | 45757618 | 45757734 |
| chr17 | 45823457 | 45823778 |
| chr17 | 46400632 | 46400795 |
| chr17 | 46520930 | 46521352 |
| chr17 | 46541094 | 46541195 |
| chr17 | 46848724 | 46849367 |
| chr17 | 47197548 | 47197651 |
| chr17 | 47303701 | 47304203 |
| chr17 | 47385969 | 47386542 |
| chr17 | 47457118 | 47457349 |
| chr17 | 47730421 | 47730945 |
| chr17 | 47735622 | 47736539 |
| chr17 | 47809440 | 47810042 |
| chr17 | 47874873 | 47875790 |
| chr17 | 47885580 | 47885794 |
| chr17 | 47985777 | 47985952 |
| chr17 | 53618581 | 53619468 |



|       |          |          |
|-------|----------|----------|
| chr17 | 53706939 | 53707037 |
| chr17 | 53761028 | 53761228 |
| chr17 | 55839544 | 55839632 |
| chr17 | 56179875 | 56180102 |
| chr17 | 56235571 | 56236746 |
| chr17 | 56461565 | 56462065 |
| chr17 | 56752821 | 56753613 |
| chr17 | 56839839 | 56840184 |
| chr17 | 56907584 | 56908343 |
| chr17 | 57133073 | 57133374 |
| chr17 | 63849379 | 63849583 |
| chr17 | 64213430 | 64213849 |
| chr17 | 64213851 | 64214034 |
| chr17 | 64229405 | 64229583 |
| chr17 | 64284780 | 64284952 |
| chr17 | 64365343 | 64365810 |
| chr17 | 64389835 | 64389996 |
| chr17 | 64950093 | 64951379 |
| chr17 | 64989266 | 64989423 |
| chr17 | 65053101 | 65053285 |
| chr17 | 65103621 | 65103898 |
| chr17 | 66133070 | 66133458 |
| chr17 | 66435432 | 66435559 |
| chr17 | 66476360 | 66476684 |
| chr17 | 68046644 | 68046997 |
| chr17 | 68103476 | 68103836 |
| chr17 | 68132162 | 68132557 |
| chr17 | 68157095 | 68157542 |
| chr17 | 68171739 | 68171936 |
| chr17 | 71202237 | 71202697 |
| chr17 | 71307384 | 71307506 |
| chr17 | 71574656 | 71574906 |
| chr17 | 71965723 | 71966455 |
| chr17 | 71968051 | 71968369 |
| chr17 | 71980619 | 71980760 |
| chr17 | 71990090 | 71990359 |
| chr17 | 71990660 | 71991496 |
| chr17 | 73267674 | 73267833 |
| chr17 | 73283903 | 73284129 |
| chr17 | 73337152 | 73337268 |
| chr17 | 73567363 | 73567723 |
| chr17 | 73574139 | 73574405 |
| chr17 | 74738333 | 74738774 |

|       |          |          |
|-------|----------|----------|
| chr17 | 74888875 | 74889246 |
| chr17 | 74979609 | 74979942 |
| chr17 | 75016101 | 75016406 |
| chr17 | 75026848 | 75027083 |
| chr17 | 75049158 | 75049551 |
| chr17 | 75058508 | 75058730 |
| chr17 | 75145587 | 75145826 |
| chr17 | 78599749 | 78600349 |
| chr17 | 79060980 | 79061115 |
| chr17 | 79315989 | 79316224 |
| chr17 | 80298449 | 80298591 |
| chr17 | 83750303 | 83750889 |
| chr17 | 83795066 | 83795396 |
| chr17 | 83830304 | 83830606 |
| chr17 | 83868845 | 83869098 |
| chr17 | 84105381 | 84105786 |
| chr17 | 84149539 | 84149743 |
| chr17 | 84261224 | 84261431 |
| chr17 | 84790773 | 84790900 |
| chr17 | 85357345 | 85358297 |
| chr17 | 85365793 | 85366311 |
| chr17 | 85397100 | 85397361 |
| chr17 | 85410201 | 85410555 |
| chr17 | 85592909 | 85593143 |
| chr17 | 86603198 | 86603598 |
| chr17 | 86617527 | 86618308 |
| chr17 | 87153341 | 87153478 |
| chr17 | 88036030 | 88036657 |
| chr17 | 88108715 | 88108879 |
| chr17 | 88245837 | 88245956 |
| chr17 | 88374394 | 88375689 |
| chr17 | 88469728 | 88470236 |
| chr17 | 88602243 | 88602499 |
| chr17 | 88840352 | 88841139 |
| chr17 | 88866587 | 88866817 |
| chr17 | 88906101 | 88906192 |
| chr17 | 89491284 | 89491439 |
| chr17 | 93737194 | 93737562 |
| chr17 | 93752027 | 93752305 |
| chr17 | 95159308 | 95159439 |
| chr18 | 3774663  | 3775014  |
| chr18 | 3789493  | 3789650  |
| chr18 | 3834148  | 3834510  |

|       |          |          |
|-------|----------|----------|
| chr18 | 4389398  | 4389806  |
| chr18 | 4414126  | 4414393  |
| chr18 | 4921311  | 4922372  |
| chr18 | 4960617  | 4960868  |
| chr18 | 4999307  | 4999826  |
| chr18 | 5591874  | 5592991  |
| chr18 | 5593127  | 5593571  |
| chr18 | 5710900  | 5711025  |
| chr18 | 6085368  | 6085502  |
| chr18 | 6490738  | 6490928  |
| chr18 | 6765209  | 6765698  |
| chr18 | 7835173  | 7835307  |
| chr18 | 7868847  | 7869058  |
| chr18 | 7892167  | 7892375  |
| chr18 | 7916018  | 7916184  |
| chr18 | 9965253  | 9965668  |
| chr18 | 9966148  | 9966528  |
| chr18 | 10725559 | 10726453 |
| chr18 | 10814529 | 10814814 |
| chr18 | 11846116 | 11846345 |
| chr18 | 12031215 | 12031471 |
| chr18 | 12306317 | 12306885 |
| chr18 | 12314068 | 12314256 |
| chr18 | 12331833 | 12331946 |
| chr18 | 12759990 | 12760272 |
| chr18 | 12770792 | 12771122 |
| chr18 | 12802225 | 12802739 |
| chr18 | 13027748 | 13028211 |
| chr18 | 13094094 | 13094283 |
| chr18 | 13118245 | 13118475 |
| chr18 | 14881826 | 14881946 |
| chr18 | 20761999 | 20762341 |
| chr18 | 20939273 | 20939527 |
| chr18 | 21102829 | 21102914 |
| chr18 | 24179148 | 24179353 |
| chr18 | 24443211 | 24443331 |
| chr18 | 25215504 | 25215756 |
| chr18 | 25249034 | 25249254 |
| chr18 | 25327589 | 25327754 |
| chr18 | 25384410 | 25384880 |
| chr18 | 25479860 | 25479959 |
| chr18 | 28512682 | 28512846 |
| chr18 | 31963862 | 31964229 |

|       |          |          |
|-------|----------|----------|
| chr18 | 32000162 | 32000607 |
| chr18 | 32053782 | 32054139 |
| chr18 | 32227463 | 32227764 |
| chr18 | 32262926 | 32263434 |
| chr18 | 32402015 | 32402255 |
| chr18 | 32417782 | 32417988 |
| chr18 | 32980359 | 32980481 |
| chr18 | 33954546 | 33955142 |
| chr18 | 34380599 | 34381406 |
| chr18 | 34440529 | 34440686 |
| chr18 | 34936648 | 34937664 |
| chr18 | 34963146 | 34963931 |
| chr18 | 34968378 | 34969160 |
| chr18 | 35278538 | 35279160 |
| chr18 | 35713899 | 35714347 |
| chr18 | 35716587 | 35717037 |
| chr18 | 35720691 | 35723443 |
| chr18 | 35744088 | 35744687 |
| chr18 | 35758288 | 35759108 |
| chr18 | 35767773 | 35768038 |
| chr18 | 35931138 | 35932127 |
| chr18 | 35989605 | 35990619 |
| chr18 | 36123976 | 36124492 |
| chr18 | 36440674 | 36441441 |
| chr18 | 36445831 | 36447122 |
| chr18 | 36479819 | 36480165 |
| chr18 | 36551196 | 36551521 |
| chr18 | 36720193 | 36721141 |
| chr18 | 36758818 | 36758948 |
| chr18 | 36823815 | 36824106 |
| chr18 | 36961517 | 36961710 |
| chr18 | 37972562 | 37973377 |
| chr18 | 38000116 | 38000526 |
| chr18 | 38456435 | 38456732 |
| chr18 | 39273874 | 39274141 |
| chr18 | 39336439 | 39336661 |
| chr18 | 39437634 | 39437943 |
| chr18 | 40952369 | 40952469 |
| chr18 | 41356139 | 41356240 |
| chr18 | 42449085 | 42449202 |
| chr18 | 42671150 | 42672058 |
| chr18 | 42684567 | 42684964 |
| chr18 | 44540225 | 44540837 |

|       |          |          |
|-------|----------|----------|
| chr18 | 45040054 | 45040200 |
| chr18 | 46545753 | 46545954 |
| chr18 | 46901742 | 46902009 |
| chr18 | 47060454 | 47060585 |
| chr18 | 47085000 | 47085174 |
| chr18 | 47143394 | 47143739 |
| chr18 | 47144531 | 47144914 |
| chr18 | 47151766 | 47152272 |
| chr18 | 47161365 | 47162087 |
| chr18 | 47180689 | 47181090 |
| chr18 | 47186137 | 47186404 |
| chr18 | 48206299 | 48206436 |
| chr18 | 49992298 | 49992772 |
| chr18 | 50007576 | 50007719 |
| chr18 | 50016008 | 50016167 |
| chr18 | 50046975 | 50047111 |
| chr18 | 50068921 | 50069054 |
| chr18 | 50139859 | 50140038 |
| chr18 | 50182325 | 50182644 |
| chr18 | 50212923 | 50213401 |
| chr18 | 53336016 | 53336730 |
| chr18 | 53368556 | 53368725 |
| chr18 | 53905723 | 53905824 |
| chr18 | 54021881 | 54022644 |
| chr18 | 56867434 | 56868028 |
| chr18 | 56868149 | 56869009 |
| chr18 | 56912875 | 56913036 |
| chr18 | 57535861 | 57536306 |
| chr18 | 57545145 | 57545505 |
| chr18 | 57550620 | 57551285 |
| chr18 | 58038203 | 58038831 |
| chr18 | 58819369 | 58819635 |
| chr18 | 60332787 | 60332912 |
| chr18 | 60934261 | 60934823 |
| chr18 | 60936631 | 60936951 |
| chr18 | 61714944 | 61715762 |
| chr18 | 61748869 | 61749244 |
| chr18 | 63081996 | 63082221 |
| chr18 | 64088104 | 64088322 |
| chr18 | 65062986 | 65063288 |
| chr18 | 65068730 | 65068979 |
| chr18 | 65085105 | 65085672 |
| chr18 | 65157900 | 65158274 |

|       |          |          |
|-------|----------|----------|
| chr18 | 65172088 | 65172505 |
| chr18 | 65587160 | 65587436 |
| chr18 | 65727464 | 65727628 |
| chr18 | 65827080 | 65827355 |
| chr18 | 66624911 | 66625152 |
| chr18 | 67449160 | 67449711 |
| chr18 | 67450894 | 67451634 |
| chr18 | 67584721 | 67584805 |
| chr18 | 67640466 | 67640695 |
| chr18 | 67875027 | 67875111 |
| chr18 | 67934643 | 67935104 |
| chr18 | 67954145 | 67954562 |
| chr18 | 68000893 | 68001576 |
| chr18 | 68092981 | 68093451 |
| chr18 | 69505763 | 69506043 |
| chr18 | 70117080 | 70117203 |
| chr18 | 70728046 | 70728557 |
| chr18 | 70767492 | 70767785 |
| chr18 | 73732474 | 73732728 |
| chr18 | 73733058 | 73733441 |
| chr18 | 75160190 | 75161295 |
| chr18 | 75161426 | 75161668 |
| chr18 | 75178436 | 75178804 |
| chr18 | 75526891 | 75530915 |
| chr18 | 75550363 | 75552705 |
| chr18 | 76195163 | 76195702 |
| chr18 | 76223941 | 76224074 |
| chr18 | 76231749 | 76232166 |
| chr18 | 76232596 | 76232931 |
| chr18 | 76256584 | 76257034 |
| chr18 | 76425032 | 76425275 |
| chr18 | 76428199 | 76428949 |
| chr18 | 77168831 | 77169090 |
| chr18 | 77277964 | 77279829 |
| chr18 | 77285414 | 77287024 |
| chr18 | 77302830 | 77305477 |
| chr18 | 77313904 | 77314487 |
| chr18 | 77325281 | 77325710 |
| chr18 | 77336035 | 77336505 |
| chr18 | 77380409 | 77380825 |
| chr18 | 77381962 | 77382596 |
| chr18 | 77399039 | 77399141 |
| chr18 | 78012731 | 78013423 |

|       |          |          |
|-------|----------|----------|
| chr18 | 78033037 | 78033612 |
| chr18 | 78730237 | 78730327 |
| chr18 | 80403633 | 80404260 |
| chr18 | 80406301 | 80406597 |
| chr18 | 85110475 | 85110779 |
| chr18 | 85121181 | 85121825 |
| chr18 | 85148121 | 85148520 |
| chr18 | 89170200 | 89170520 |
| chr18 | 89221537 | 89221772 |
| chr18 | 89256025 | 89256377 |
| chr19 | 3205850  | 3206060  |
| chr19 | 3576258  | 3576381  |
| chr19 | 3768889  | 3769225  |
| chr19 | 3851853  | 3852552  |
| chr19 | 3876831  | 3878030  |
| chr19 | 4002767  | 4003487  |
| chr19 | 4153717  | 4154008  |
| chr19 | 4232015  | 4232187  |
| chr19 | 4444042  | 4444400  |
| chr19 | 4482998  | 4483293  |
| chr19 | 4615135  | 4616036  |
| chr19 | 4751945  | 4752073  |
| chr19 | 5367328  | 5367454  |
| chr19 | 5426889  | 5427351  |
| chr19 | 5461635  | 5461898  |
| chr19 | 5493429  | 5494017  |
| chr19 | 5642500  | 5642595  |
| chr19 | 6306633  | 6308530  |
| chr19 | 6318018  | 6318477  |
| chr19 | 6324449  | 6325531  |
| chr19 | 6340115  | 6340326  |
| chr19 | 6353523  | 6353961  |
| chr19 | 6363708  | 6364959  |
| chr19 | 6374720  | 6376780  |
| chr19 | 6516762  | 6516963  |
| chr19 | 7049386  | 7049829  |
| chr19 | 7321196  | 7321302  |
| chr19 | 7342584  | 7343556  |
| chr19 | 7348870  | 7349488  |
| chr19 | 7569255  | 7569469  |
| chr19 | 8798456  | 8800921  |
| chr19 | 8839512  | 8840034  |
| chr19 | 8840053  | 8841259  |

|       |          |          |
|-------|----------|----------|
| chr19 | 8894448  | 8895390  |
| chr19 | 8946008  | 8946331  |
| chr19 | 8967503  | 8967836  |
| chr19 | 8981707  | 8982779  |
| chr19 | 8982884  | 8983506  |
| chr19 | 8990104  | 8991158  |
| chr19 | 9008100  | 9008431  |
| chr19 | 9023313  | 9023713  |
| chr19 | 9041595  | 9041940  |
| chr19 | 9051076  | 9051801  |
| chr19 | 9063781  | 9064104  |
| chr19 | 9076440  | 9077044  |
| chr19 | 9092033  | 9092727  |
| chr19 | 10057129 | 10057578 |
| chr19 | 10059009 | 10059568 |
| chr19 | 10269643 | 10270044 |
| chr19 | 10463621 | 10463741 |
| chr19 | 10480018 | 10480201 |
| chr19 | 10600195 | 10600564 |
| chr19 | 10609717 | 10610053 |
| chr19 | 10680065 | 10680438 |
| chr19 | 10703580 | 10704451 |
| chr19 | 10787258 | 10787739 |
| chr19 | 11769754 | 11769866 |
| chr19 | 12040830 | 12041042 |
| chr19 | 12080523 | 12080650 |
| chr19 | 12086415 | 12086547 |
| chr19 | 12086751 | 12086875 |
| chr19 | 15754511 | 15754625 |
| chr19 | 16207220 | 16208222 |
| chr19 | 16223951 | 16224049 |
| chr19 | 16335734 | 16335848 |
| chr19 | 16392817 | 16393455 |
| chr19 | 16423271 | 16423494 |
| chr19 | 16458129 | 16458450 |
| chr19 | 18663378 | 18663487 |
| chr19 | 18745703 | 18745864 |
| chr19 | 18788031 | 18788290 |
| chr19 | 18807230 | 18807430 |
| chr19 | 21346789 | 21347210 |
| chr19 | 21727774 | 21728421 |
| chr19 | 21852830 | 21853482 |
| chr19 | 21867313 | 21867502 |



|       |          |          |
|-------|----------|----------|
| chr19 | 22011833 | 22011937 |
| chr19 | 22926621 | 22926719 |
| chr19 | 23145558 | 23145671 |
| chr19 | 23215308 | 23217616 |
| chr19 | 23762060 | 23762260 |
| chr19 | 29175894 | 29176548 |
| chr19 | 29181487 | 29181814 |
| chr19 | 29186936 | 29187441 |
| chr19 | 29198467 | 29198905 |
| chr19 | 29207275 | 29207548 |
| chr19 | 30105009 | 30105332 |
| chr19 | 30140456 | 30140840 |
| chr19 | 32463900 | 32464229 |
| chr19 | 32560409 | 32560603 |
| chr19 | 32832153 | 32832990 |
| chr19 | 32875270 | 32875528 |
| chr19 | 34028723 | 34028876 |
| chr19 | 35017146 | 35017396 |
| chr19 | 36908714 | 36909578 |
| chr19 | 36930052 | 36930420 |
| chr19 | 37010878 | 37010981 |
| chr19 | 37026850 | 37027212 |
| chr19 | 37479394 | 37479551 |
| chr19 | 37495264 | 37495555 |
| chr19 | 38129600 | 38129800 |
| chr19 | 38919496 | 38919602 |
| chr19 | 39005897 | 39006255 |
| chr19 | 40194200 | 40194430 |
| chr19 | 40968543 | 40968827 |
| chr19 | 41168373 | 41168568 |
| chr19 | 41558081 | 41558425 |
| chr19 | 41577472 | 41577776 |
| chr19 | 41617442 | 41617558 |
| chr19 | 42056050 | 42057647 |
| chr19 | 42062242 | 42062819 |
| chr19 | 42069073 | 42069403 |
| chr19 | 42075472 | 42075923 |
| chr19 | 42096630 | 42097205 |
| chr19 | 42180245 | 42180399 |
| chr19 | 42222384 | 42223137 |
| chr19 | 42245105 | 42245396 |
| chr19 | 42259933 | 42260381 |
| chr19 | 42264957 | 42266084 |

|       |          |          |
|-------|----------|----------|
| chr19 | 42593362 | 42593644 |
| chr19 | 43514907 | 43515246 |
| chr19 | 43515781 | 43515977 |
| chr19 | 44368577 | 44369021 |
| chr19 | 44377361 | 44381375 |
| chr19 | 44991302 | 44991386 |
| chr19 | 45076691 | 45077362 |
| chr19 | 45093363 | 45093520 |
| chr19 | 45095861 | 45096215 |
| chr19 | 45099119 | 45099372 |
| chr19 | 45469714 | 45469923 |
| chr19 | 45638144 | 45638247 |
| chr19 | 46131450 | 46132344 |
| chr19 | 46138671 | 46139659 |
| chr19 | 46673611 | 46673898 |
| chr19 | 46691779 | 46692169 |
| chr19 | 46858465 | 46859064 |
| chr19 | 46873077 | 46873293 |
| chr19 | 46916957 | 46917589 |
| chr19 | 47132650 | 47132799 |
| chr19 | 47182107 | 47182373 |
| chr19 | 47187955 | 47188307 |
| chr19 | 53217238 | 53217650 |
| chr19 | 53230280 | 53230515 |
| chr19 | 53414810 | 53414946 |
| chr19 | 53438022 | 53438118 |
| chr19 | 54019312 | 54019777 |
| chr19 | 54020180 | 54020332 |
| chr19 | 55421006 | 55421225 |
| chr19 | 55817046 | 55817446 |
| chr19 | 55848965 | 55849118 |
| chr19 | 55924593 | 55924958 |
| chr19 | 56005976 | 56006254 |
| chr19 | 56585829 | 56586202 |
| chr19 | 56586227 | 56586876 |
| chr19 | 56634815 | 56634921 |
| chr19 | 57685782 | 57686238 |
| chr19 | 57697614 | 57697821 |
| chr19 | 58588983 | 58589376 |
| chr19 | 58597656 | 58598490 |
| chr19 | 58631606 | 58632122 |
| chr2  | 3117193  | 3117373  |
| chr2  | 3216286  | 3216616  |

|      |          |          |
|------|----------|----------|
| chr2 | 4437077  | 4437228  |
| chr2 | 4663986  | 4664189  |
| chr2 | 4803158  | 4803396  |
| chr2 | 5884174  | 5884296  |
| chr2 | 6262141  | 6262264  |
| chr2 | 6287032  | 6287121  |
| chr2 | 10348786 | 10349097 |
| chr2 | 10386427 | 10386604 |
| chr2 | 10512571 | 10512985 |
| chr2 | 12849159 | 12849576 |
| chr2 | 13495932 | 13496459 |
| chr2 | 13995767 | 13995945 |
| chr2 | 17986214 | 17986729 |
| chr2 | 17986755 | 17987348 |
| chr2 | 17987536 | 17987626 |
| chr2 | 18013768 | 18013994 |
| chr2 | 18055473 | 18055615 |
| chr2 | 18065920 | 18066277 |
| chr2 | 18106468 | 18107464 |
| chr2 | 18122028 | 18122300 |
| chr2 | 20441129 | 20441548 |
| chr2 | 20442189 | 20442550 |
| chr2 | 20455101 | 20457371 |
| chr2 | 20463108 | 20464669 |
| chr2 | 20474321 | 20475411 |
| chr2 | 20522896 | 20523604 |
| chr2 | 20540770 | 20541203 |
| chr2 | 20550226 | 20550467 |
| chr2 | 20558307 | 20558542 |
| chr2 | 20600575 | 20601138 |
| chr2 | 20609700 | 20610109 |
| chr2 | 20652045 | 20652593 |
| chr2 | 20664987 | 20665884 |
| chr2 | 20711815 | 20712339 |
| chr2 | 20730338 | 20731058 |
| chr2 | 21137123 | 21137457 |
| chr2 | 21137865 | 21138249 |
| chr2 | 22443464 | 22443799 |
| chr2 | 22445177 | 22445503 |
| chr2 | 22969090 | 22969373 |
| chr2 | 23012057 | 23012269 |
| chr2 | 23033930 | 23034073 |
| chr2 | 23034571 | 23034856 |

|      |          |          |
|------|----------|----------|
| chr2 | 24805567 | 24805817 |
| chr2 | 24831093 | 24831714 |
| chr2 | 25118999 | 25119495 |
| chr2 | 25128004 | 25128177 |
| chr2 | 25205874 | 25206596 |
| chr2 | 25284220 | 25285181 |
| chr2 | 25562437 | 25562678 |
| chr2 | 26766330 | 26767142 |
| chr2 | 26767690 | 26768228 |
| chr2 | 26768288 | 26768723 |
| chr2 | 27257441 | 27257564 |
| chr2 | 27370680 | 27371278 |
| chr2 | 27390410 | 27391096 |
| chr2 | 27532888 | 27533906 |
| chr2 | 27741950 | 27742575 |
| chr2 | 27859376 | 27859484 |
| chr2 | 27885486 | 27885769 |
| chr2 | 27892510 | 27893089 |
| chr2 | 28289735 | 28289821 |
| chr2 | 28324709 | 28325030 |
| chr2 | 28325237 | 28325715 |
| chr2 | 28369102 | 28369570 |
| chr2 | 28742518 | 28742670 |
| chr2 | 28791961 | 28792196 |
| chr2 | 28919529 | 28919841 |
| chr2 | 28980627 | 28981179 |
| chr2 | 29024592 | 29024728 |
| chr2 | 29508131 | 29509112 |
| chr2 | 29528442 | 29528739 |
| chr2 | 29557731 | 29558198 |
| chr2 | 29565515 | 29566160 |
| chr2 | 29576978 | 29577227 |
| chr2 | 29745366 | 29746563 |
| chr2 | 29747864 | 29748544 |
| chr2 | 29760506 | 29760873 |
| chr2 | 29780865 | 29781650 |
| chr2 | 29786002 | 29786626 |
| chr2 | 29794782 | 29795270 |
| chr2 | 29802559 | 29802803 |
| chr2 | 29821203 | 29821348 |
| chr2 | 29886595 | 29887008 |
| chr2 | 29921493 | 29923239 |
| chr2 | 30000145 | 30000413 |

|      |          |          |
|------|----------|----------|
| chr2 | 30005714 | 30007002 |
| chr2 | 30150903 | 30151009 |
| chr2 | 30271816 | 30272441 |
| chr2 | 30299149 | 30299906 |
| chr2 | 30302169 | 30302497 |
| chr2 | 30329955 | 30330457 |
| chr2 | 30341406 | 30343569 |
| chr2 | 30350550 | 30351155 |
| chr2 | 30374851 | 30375084 |
| chr2 | 30416050 | 30416221 |
| chr2 | 30663531 | 30664047 |
| chr2 | 31013594 | 31013792 |
| chr2 | 31033840 | 31034213 |
| chr2 | 31072067 | 31072495 |
| chr2 | 31162315 | 31162538 |
| chr2 | 31349041 | 31349659 |
| chr2 | 31359758 | 31361101 |
| chr2 | 31428196 | 31429074 |
| chr2 | 31453445 | 31454037 |
| chr2 | 31559580 | 31560071 |
| chr2 | 31582783 | 31583301 |
| chr2 | 31849938 | 31850590 |
| chr2 | 31891645 | 31891742 |
| chr2 | 31902794 | 31903085 |
| chr2 | 32006546 | 32007211 |
| chr2 | 32014081 | 32016395 |
| chr2 | 32057738 | 32058780 |
| chr2 | 32079379 | 32080260 |
| chr2 | 32087725 | 32088155 |
| chr2 | 32428119 | 32428251 |
| chr2 | 32489083 | 32489374 |
| chr2 | 32489466 | 32489699 |
| chr2 | 32731922 | 32732423 |
| chr2 | 32779354 | 32779913 |
| chr2 | 32817206 | 32818165 |
| chr2 | 32818434 | 32819559 |
| chr2 | 33071637 | 33071899 |
| chr2 | 33833011 | 33833205 |
| chr2 | 34262494 | 34262866 |
| chr2 | 34627611 | 34628409 |
| chr2 | 34631363 | 34631934 |
| chr2 | 34659911 | 34660213 |
| chr2 | 34804942 | 34805060 |

|      |          |          |
|------|----------|----------|
| chr2 | 34806576 | 34806799 |
| chr2 | 35477343 | 35478185 |
| chr2 | 35500371 | 35500489 |
| chr2 | 35516927 | 35518071 |
| chr2 | 35518571 | 35519080 |
| chr2 | 35523990 | 35525135 |
| chr2 | 35583655 | 35584263 |
| chr2 | 35585215 | 35585546 |
| chr2 | 37137569 | 37137722 |
| chr2 | 37307608 | 37308703 |
| chr2 | 37372042 | 37372270 |
| chr2 | 38436973 | 38437132 |
| chr2 | 38883330 | 38883436 |
| chr2 | 39488636 | 39488860 |
| chr2 | 40143402 | 40143496 |
| chr2 | 40143594 | 40143686 |
| chr2 | 41628299 | 41628393 |
| chr2 | 45554105 | 45554776 |
| chr2 | 45565172 | 45565437 |
| chr2 | 48669714 | 48669956 |
| chr2 | 48709001 | 48709137 |
| chr2 | 48805363 | 48805727 |
| chr2 | 48848950 | 48849136 |
| chr2 | 48897915 | 48898207 |
| chr2 | 48996510 | 48996685 |
| chr2 | 49033209 | 49033488 |
| chr2 | 49307069 | 49307231 |
| chr2 | 49539319 | 49539584 |
| chr2 | 51928163 | 51928856 |
| chr2 | 51982356 | 51982978 |
| chr2 | 52716762 | 52717734 |
| chr2 | 52718028 | 52718419 |
| chr2 | 52726916 | 52727621 |
| chr2 | 52732818 | 52733070 |
| chr2 | 53051225 | 53051710 |
| chr2 | 53074578 | 53074700 |
| chr2 | 57034479 | 57034625 |
| chr2 | 58696194 | 58696282 |
| chr2 | 58998831 | 59000297 |
| chr2 | 59011763 | 59012164 |
| chr2 | 59040953 | 59041759 |
| chr2 | 59069893 | 59070378 |
| chr2 | 59084356 | 59085076 |

|      |          |          |
|------|----------|----------|
| chr2 | 59146060 | 59146567 |
| chr2 | 59450151 | 59450870 |
| chr2 | 59650095 | 59650831 |
| chr2 | 59656456 | 59657279 |
| chr2 | 60047983 | 60048654 |
| chr2 | 61549837 | 61550035 |
| chr2 | 62518248 | 62518834 |
| chr2 | 62523271 | 62523759 |
| chr2 | 65243910 | 65244182 |
| chr2 | 65966234 | 65966317 |
| chr2 | 67405315 | 67405514 |
| chr2 | 68708614 | 68708844 |
| chr2 | 69504287 | 69504457 |
| chr2 | 69561047 | 69561782 |
| chr2 | 69699683 | 69700233 |
| chr2 | 69701792 | 69701961 |
| chr2 | 69735470 | 69736019 |
| chr2 | 69762483 | 69762735 |
| chr2 | 69812600 | 69812930 |
| chr2 | 69833513 | 69833658 |
| chr2 | 70499724 | 70499989 |
| chr2 | 70528711 | 70528979 |
| chr2 | 71186021 | 71187481 |
| chr2 | 71188222 | 71188679 |
| chr2 | 71227006 | 71228219 |
| chr2 | 71240487 | 71240694 |
| chr2 | 71254724 | 71255209 |
| chr2 | 71275307 | 71275470 |
| chr2 | 71624990 | 71625993 |
| chr2 | 71694121 | 71694842 |
| chr2 | 71711387 | 71711916 |
| chr2 | 72228713 | 72228878 |
| chr2 | 72817872 | 72818467 |
| chr2 | 72818571 | 72819193 |
| chr2 | 72823298 | 72823629 |
| chr2 | 75497298 | 75498241 |
| chr2 | 75616264 | 75616357 |
| chr2 | 75670488 | 75670902 |
| chr2 | 75685445 | 75685565 |
| chr2 | 75753370 | 75753766 |
| chr2 | 75765897 | 75766295 |
| chr2 | 76208069 | 76208302 |
| chr2 | 76219435 | 76219835 |

|      |           |           |
|------|-----------|-----------|
| chr2 | 80182819  | 80182923  |
| chr2 | 80478049  | 80478146  |
| chr2 | 83484894  | 83485190  |
| chr2 | 83490398  | 83490691  |
| chr2 | 83564585  | 83565091  |
| chr2 | 83646899  | 83647048  |
| chr2 | 84888460  | 84888843  |
| chr2 | 84912757  | 84913164  |
| chr2 | 86682891  | 86682990  |
| chr2 | 90492593  | 90492678  |
| chr2 | 90585795  | 90586121  |
| chr2 | 90607661  | 90608038  |
| chr2 | 90615598  | 90615796  |
| chr2 | 90687425  | 90688019  |
| chr2 | 90780646  | 90781844  |
| chr2 | 90790060  | 90791405  |
| chr2 | 90833076  | 90833276  |
| chr2 | 90856208  | 90856950  |
| chr2 | 90857081  | 90858200  |
| chr2 | 90897302  | 90897879  |
| chr2 | 91116823  | 91117009  |
| chr2 | 91367401  | 91367777  |
| chr2 | 91436201  | 91436390  |
| chr2 | 91570325  | 91570759  |
| chr2 | 91612522  | 91613082  |
| chr2 | 91613351  | 91613836  |
| chr2 | 92024055  | 92024346  |
| chr2 | 92025339  | 92025657  |
| chr2 | 92025687  | 92025912  |
| chr2 | 92131171  | 92131417  |
| chr2 | 92221250  | 92221559  |
| chr2 | 93028052  | 93028389  |
| chr2 | 93032461  | 93032935  |
| chr2 | 93040370  | 93041464  |
| chr2 | 98502405  | 98502689  |
| chr2 | 98506721  | 98507223  |
| chr2 | 98507233  | 98507527  |
| chr2 | 101538303 | 101538527 |
| chr2 | 102738115 | 102738257 |
| chr2 | 103875822 | 103876086 |
| chr2 | 104399834 | 104399936 |
| chr2 | 104400082 | 104400702 |
| chr2 | 104406437 | 104407144 |



|      |           |           |
|------|-----------|-----------|
| chr2 | 104408157 | 104408815 |
| chr2 | 104430902 | 104431288 |
| chr2 | 105750900 | 105751077 |
| chr2 | 106643458 | 106643668 |
| chr2 | 109757763 | 109758568 |
| chr2 | 110058185 | 110058295 |
| chr2 | 112105673 | 112107044 |
| chr2 | 112151019 | 112151216 |
| chr2 | 112201902 | 112202176 |
| chr2 | 112219521 | 112219873 |
| chr2 | 112353505 | 112353623 |
| chr2 | 113128446 | 113128638 |
| chr2 | 113365681 | 113365920 |
| chr2 | 113513063 | 113513174 |
| chr2 | 113929100 | 113929227 |
| chr2 | 115409735 | 115409971 |
| chr2 | 115416509 | 115416825 |
| chr2 | 116946657 | 116947733 |
| chr2 | 117073998 | 117074212 |
| chr2 | 117937626 | 117937893 |
| chr2 | 117938749 | 117939279 |
| chr2 | 117943804 | 117944116 |
| chr2 | 117950760 | 117951211 |
| chr2 | 117951298 | 117951871 |
| chr2 | 117951902 | 117952480 |
| chr2 | 118214410 | 118214780 |
| chr2 | 118263188 | 118263550 |
| chr2 | 118660956 | 118661334 |
| chr2 | 118727182 | 118727702 |
| chr2 | 118872894 | 118873329 |
| chr2 | 119063313 | 119063821 |
| chr2 | 119411207 | 119411468 |
| chr2 | 119456894 | 119456994 |
| chr2 | 119500822 | 119501412 |
| chr2 | 119568272 | 119568530 |
| chr2 | 119706535 | 119706771 |
| chr2 | 119730256 | 119730651 |
| chr2 | 119749152 | 119749855 |
| chr2 | 119761092 | 119761474 |
| chr2 | 119772555 | 119773021 |
| chr2 | 119856423 | 119856536 |
| chr2 | 119859500 | 119859786 |
| chr2 | 120326870 | 120327150 |

|      |           |           |
|------|-----------|-----------|
| chr2 | 120372100 | 120372194 |
| chr2 | 120494685 | 120495105 |
| chr2 | 120495174 | 120495296 |
| chr2 | 120496049 | 120496290 |
| chr2 | 120829824 | 120830089 |
| chr2 | 121239677 | 121240300 |
| chr2 | 121263348 | 121263756 |
| chr2 | 121369288 | 121370173 |
| chr2 | 121692716 | 121693023 |
| chr2 | 121787632 | 121787882 |
| chr2 | 121854647 | 121855169 |
| chr2 | 121973439 | 121973580 |
| chr2 | 122203692 | 122203864 |
| chr2 | 122572917 | 122573316 |
| chr2 | 124930743 | 124930878 |
| chr2 | 125973627 | 125973717 |
| chr2 | 126570111 | 126570439 |
| chr2 | 126834648 | 126834864 |
| chr2 | 127044777 | 127044962 |
| chr2 | 127074059 | 127074341 |
| chr2 | 127255840 | 127257424 |
| chr2 | 128552817 | 128553007 |
| chr2 | 128793385 | 128793962 |
| chr2 | 128814645 | 128814886 |
| chr2 | 128830708 | 128830909 |
| chr2 | 128958984 | 128959415 |
| chr2 | 129024557 | 129024730 |
| chr2 | 129036771 | 129037101 |
| chr2 | 129626468 | 129627230 |
| chr2 | 129654777 | 129655855 |
| chr2 | 129657069 | 129657362 |
| chr2 | 130101226 | 130101525 |
| chr2 | 130101815 | 130103237 |
| chr2 | 130103387 | 130103647 |
| chr2 | 130103700 | 130103889 |
| chr2 | 130276258 | 130276557 |
| chr2 | 130329899 | 130330099 |
| chr2 | 130389751 | 130390086 |
| chr2 | 130499624 | 130499960 |
| chr2 | 131088330 | 131088652 |
| chr2 | 131091197 | 131091449 |
| chr2 | 132088849 | 132089583 |
| chr2 | 132103929 | 132104412 |

|      |           |           |
|------|-----------|-----------|
| chr2 | 132542233 | 132542350 |
| chr2 | 132643901 | 132644219 |
| chr2 | 132834204 | 132834445 |
| chr2 | 134113365 | 134113598 |
| chr2 | 135472529 | 135472793 |
| chr2 | 135485240 | 135485847 |
| chr2 | 136766155 | 136766253 |
| chr2 | 138082792 | 138083075 |
| chr2 | 140221241 | 140221407 |
| chr2 | 140221541 | 140221780 |
| chr2 | 141466238 | 141466365 |
| chr2 | 144463862 | 144464370 |
| chr2 | 146838977 | 146839356 |
| chr2 | 146861388 | 146861614 |
| chr2 | 146871148 | 146871266 |
| chr2 | 150030565 | 150030849 |
| chr2 | 150099792 | 150100357 |
| chr2 | 150105837 | 150106443 |
| chr2 | 150108225 | 150108547 |
| chr2 | 150613733 | 150613881 |
| chr2 | 151336817 | 151336971 |
| chr2 | 151369324 | 151369812 |
| chr2 | 151386399 | 151386625 |
| chr2 | 152098666 | 152098849 |
| chr2 | 152495218 | 152496099 |
| chr2 | 152561990 | 152562184 |
| chr2 | 152987478 | 152987909 |
| chr2 | 153011161 | 153011629 |
| chr2 | 153026054 | 153026318 |
| chr2 | 153035362 | 153036206 |
| chr2 | 153067981 | 153068178 |
| chr2 | 153079840 | 153080395 |
| chr2 | 153171563 | 153172473 |
| chr2 | 153183571 | 153184318 |
| chr2 | 153189077 | 153189488 |
| chr2 | 153190360 | 153190784 |
| chr2 | 153195897 | 153196204 |
| chr2 | 153202858 | 153203141 |
| chr2 | 153205455 | 153205621 |
| chr2 | 153224982 | 153225970 |
| chr2 | 153567146 | 153567389 |
| chr2 | 153571386 | 153571507 |
| chr2 | 154262243 | 154263024 |

|      |           |           |
|------|-----------|-----------|
| chr2 | 154264419 | 154264870 |
| chr2 | 154298463 | 154298887 |
| chr2 | 154326355 | 154326466 |
| chr2 | 154363587 | 154364287 |
| chr2 | 154439295 | 154439628 |
| chr2 | 154441550 | 154441693 |
| chr2 | 154617091 | 154618010 |
| chr2 | 154631813 | 154632410 |
| chr2 | 154692683 | 154692944 |
| chr2 | 155040089 | 155040183 |
| chr2 | 155212718 | 155213153 |
| chr2 | 155791308 | 155791773 |
| chr2 | 155814814 | 155815302 |
| chr2 | 156022549 | 156023132 |
| chr2 | 156100360 | 156100531 |
| chr2 | 156247780 | 156247923 |
| chr2 | 156292014 | 156292400 |
| chr2 | 156338802 | 156339323 |
| chr2 | 156526516 | 156526633 |
| chr2 | 156546651 | 156548428 |
| chr2 | 156688917 | 156689242 |
| chr2 | 157109321 | 157109483 |
| chr2 | 157115191 | 157115403 |
| chr2 | 157116294 | 157116482 |
| chr2 | 157123146 | 157123435 |
| chr2 | 157249611 | 157250709 |
| chr2 | 157287308 | 157288310 |
| chr2 | 157663071 | 157663352 |
| chr2 | 157663418 | 157664147 |
| chr2 | 157748836 | 157748972 |
| chr2 | 158207407 | 158208523 |
| chr2 | 158602852 | 158603657 |
| chr2 | 158629828 | 158630141 |
| chr2 | 158650751 | 158651237 |
| chr2 | 158658990 | 158659265 |
| chr2 | 158675256 | 158676277 |
| chr2 | 158683218 | 158683917 |
| chr2 | 160472040 | 160472273 |
| chr2 | 160472352 | 160472792 |
| chr2 | 160507549 | 160507846 |
| chr2 | 160511865 | 160511991 |
| chr2 | 162218623 | 162219542 |
| chr2 | 162236217 | 162236380 |

|      |           |           |
|------|-----------|-----------|
| chr2 | 162266610 | 162266714 |
| chr2 | 162757824 | 162758234 |
| chr2 | 162760291 | 162760729 |
| chr2 | 162880153 | 162881756 |
| chr2 | 162899236 | 162899729 |
| chr2 | 163820918 | 163821075 |
| chr2 | 163821169 | 163821405 |
| chr2 | 163926667 | 163926843 |
| chr2 | 163953571 | 163953958 |
| chr2 | 164323054 | 164323280 |
| chr2 | 164595410 | 164596003 |
| chr2 | 164664692 | 164665131 |
| chr2 | 165641881 | 165646452 |
| chr2 | 165825368 | 165825600 |
| chr2 | 165867558 | 165867794 |
| chr2 | 165979910 | 165980144 |
| chr2 | 166267393 | 166267480 |
| chr2 | 166619408 | 166619598 |
| chr2 | 166651033 | 166651203 |
| chr2 | 166731529 | 166732275 |
| chr2 | 166888724 | 166889410 |
| chr2 | 166890395 | 166891009 |
| chr2 | 167260215 | 167260427 |
| chr2 | 167274517 | 167277072 |
| chr2 | 167295471 | 167295997 |
| chr2 | 167299716 | 167301533 |
| chr2 | 167757849 | 167758482 |
| chr2 | 167836653 | 167836738 |
| chr2 | 168137287 | 168137589 |
| chr2 | 168784593 | 168784950 |
| chr2 | 168814229 | 168814800 |
| chr2 | 168844895 | 168845447 |
| chr2 | 169134101 | 169134284 |
| chr2 | 172438736 | 172439044 |
| chr2 | 172825613 | 172826173 |
| chr2 | 172838288 | 172839148 |
| chr2 | 173570831 | 173571201 |
| chr2 | 173901861 | 173902474 |
| chr2 | 173937842 | 173938342 |
| chr2 | 173946070 | 173946560 |
| chr2 | 174155466 | 174155913 |
| chr2 | 174155929 | 174156704 |
| chr2 | 174249157 | 174249585 |

|      |           |           |
|------|-----------|-----------|
| chr2 | 176819054 | 176819291 |
| chr2 | 176874656 | 176874907 |
| chr2 | 177500021 | 177500164 |
| chr2 | 177758064 | 177758289 |
| chr2 | 178219136 | 178219362 |
| chr2 | 179151169 | 179151443 |
| chr2 | 179818746 | 179819096 |
| chr2 | 179896854 | 179897093 |
| chr2 | 179909634 | 179909978 |
| chr2 | 179992124 | 179992805 |
| chr2 | 180192413 | 180192651 |
| chr2 | 180330259 | 180330482 |
| chr2 | 180356243 | 180356445 |
| chr2 | 180445435 | 180445684 |
| chr2 | 180452665 | 180453398 |
| chr2 | 180702024 | 180702397 |
| chr2 | 180716490 | 180717592 |
| chr2 | 180717899 | 180720251 |
| chr2 | 180731097 | 180732081 |
| chr2 | 180741943 | 180742657 |
| chr2 | 180751932 | 180752252 |
| chr2 | 181062931 | 181063378 |
| chr2 | 181089174 | 181090061 |
| chr2 | 181244394 | 181244748 |
| chr2 | 181352777 | 181352927 |
| chr3 | 3149508   | 3149612   |
| chr3 | 3198982   | 3199103   |
| chr3 | 4338997   | 4339167   |
| chr3 | 5750902   | 5751112   |
| chr3 | 8429151   | 8429292   |
| chr3 | 8545895   | 8546124   |
| chr3 | 9251285   | 9251738   |
| chr3 | 16083160  | 16083476  |
| chr3 | 16083547  | 16083899  |
| chr3 | 16096950  | 16097391  |
| chr3 | 16098016  | 16098317  |
| chr3 | 16112540  | 16112780  |
| chr3 | 19088316  | 19088669  |
| chr3 | 19090958  | 19091249  |
| chr3 | 19460252  | 19460443  |
| chr3 | 19528405  | 19528494  |
| chr3 | 19528805  | 19529111  |
| chr3 | 19971781  | 19971967  |

|      |          |          |
|------|----------|----------|
| chr3 | 21975567 | 21976399 |
| chr3 | 22019152 | 22019382 |
| chr3 | 22083479 | 22083845 |
| chr3 | 22096517 | 22096704 |
| chr3 | 27137147 | 27137248 |
| chr3 | 30500191 | 30500307 |
| chr3 | 30692353 | 30692848 |
| chr3 | 30754926 | 30755179 |
| chr3 | 30780607 | 30780791 |
| chr3 | 30908684 | 30909084 |
| chr3 | 30949262 | 30949353 |
| chr3 | 30994040 | 30994471 |
| chr3 | 31020138 | 31020319 |
| chr3 | 32296462 | 32296905 |
| chr3 | 32328279 | 32328410 |
| chr3 | 32409497 | 32409694 |
| chr3 | 32409730 | 32410235 |
| chr3 | 32607714 | 32608289 |
| chr3 | 33699115 | 33699544 |
| chr3 | 33919021 | 33920081 |
| chr3 | 33968271 | 33968530 |
| chr3 | 34548931 | 34550839 |
| chr3 | 35653053 | 35653440 |
| chr3 | 35722189 | 35722756 |
| chr3 | 35981777 | 35982072 |
| chr3 | 36886372 | 36886565 |
| chr3 | 37431333 | 37431560 |
| chr3 | 40507952 | 40508183 |
| chr3 | 40603992 | 40604216 |
| chr3 | 40753900 | 40754537 |
| chr3 | 41359682 | 41360478 |
| chr3 | 41360518 | 41360952 |
| chr3 | 41360963 | 41362055 |
| chr3 | 41366613 | 41370929 |
| chr3 | 41393411 | 41394587 |
| chr3 | 41394637 | 41395355 |
| chr3 | 41418324 | 41418937 |
| chr3 | 46114709 | 46114795 |
| chr3 | 48758638 | 48758848 |
| chr3 | 48883636 | 48883747 |
| chr3 | 48901498 | 48901753 |
| chr3 | 48935424 | 48935613 |
| chr3 | 51001061 | 51001250 |

|      |          |          |
|------|----------|----------|
| chr3 | 51028547 | 51029505 |
| chr3 | 51162270 | 51162391 |
| chr3 | 51163328 | 51163440 |
| chr3 | 51220200 | 51221189 |
| chr3 | 51908837 | 51909068 |
| chr3 | 52072382 | 52072954 |
| chr3 | 52073604 | 52073918 |
| chr3 | 52092021 | 52092411 |
| chr3 | 53282754 | 53283012 |
| chr3 | 54539445 | 54539600 |
| chr3 | 54916221 | 54916621 |
| chr3 | 54988169 | 54988386 |
| chr3 | 54996689 | 54996876 |
| chr3 | 55011710 | 55011941 |
| chr3 | 57540058 | 57540223 |
| chr3 | 57594406 | 57594497 |
| chr3 | 58218685 | 58219242 |
| chr3 | 58887820 | 58888222 |
| chr3 | 59235935 | 59236093 |
| chr3 | 59236594 | 59236750 |
| chr3 | 59236814 | 59237041 |
| chr3 | 60360377 | 60360576 |
| chr3 | 65332489 | 65332996 |
| chr3 | 65333039 | 65333287 |
| chr3 | 65481887 | 65482218 |
| chr3 | 66718281 | 66718384 |
| chr3 | 66859879 | 66860034 |
| chr3 | 66869986 | 66870192 |
| chr3 | 67126360 | 67126497 |
| chr3 | 67270323 | 67270599 |
| chr3 | 67406766 | 67407009 |
| chr3 | 68299126 | 68299885 |
| chr3 | 68380583 | 68380879 |
| chr3 | 68808919 | 68810100 |
| chr3 | 69148207 | 69149093 |
| chr3 | 75368651 | 75368768 |
| chr3 | 79399309 | 79399735 |
| chr3 | 80954004 | 80954221 |
| chr3 | 83374613 | 83374803 |
| chr3 | 83506186 | 83506305 |
| chr3 | 84618530 | 84619669 |
| chr3 | 84673103 | 84673389 |
| chr3 | 84734833 | 84734954 |



|      |          |          |
|------|----------|----------|
| chr3 | 85382123 | 85382389 |
| chr3 | 85444285 | 85444960 |
| chr3 | 85775045 | 85775870 |
| chr3 | 85795827 | 85796544 |
| chr3 | 85798628 | 85798839 |
| chr3 | 85802287 | 85802569 |
| chr3 | 85836343 | 85836686 |
| chr3 | 85837556 | 85837775 |
| chr3 | 86122929 | 86123233 |
| chr3 | 86188167 | 86188277 |
| chr3 | 86209766 | 86209920 |
| chr3 | 86261913 | 86262100 |
| chr3 | 86324216 | 86324379 |
| chr3 | 87538300 | 87538421 |
| chr3 | 87718451 | 87719228 |
| chr3 | 87719680 | 87720100 |
| chr3 | 87908409 | 87909647 |
| chr3 | 87924337 | 87924902 |
| chr3 | 87946273 | 87946830 |
| chr3 | 87998103 | 87998207 |
| chr3 | 88101060 | 88101514 |
| chr3 | 88140472 | 88140752 |
| chr3 | 88155252 | 88156558 |
| chr3 | 88165002 | 88165704 |
| chr3 | 88335875 | 88336493 |
| chr3 | 88342334 | 88342803 |
| chr3 | 88357859 | 88358461 |
| chr3 | 88367017 | 88367351 |
| chr3 | 88371826 | 88372363 |
| chr3 | 88382414 | 88382938 |
| chr3 | 88424948 | 88425602 |
| chr3 | 88497851 | 88498114 |
| chr3 | 88589588 | 88589823 |
| chr3 | 88603786 | 88603982 |
| chr3 | 88627119 | 88627343 |
| chr3 | 88644868 | 88644984 |
| chr3 | 88684242 | 88684441 |
| chr3 | 88754582 | 88755197 |
| chr3 | 88788878 | 88789275 |
| chr3 | 88833980 | 88834103 |
| chr3 | 88968731 | 88969233 |
| chr3 | 88973149 | 88973579 |
| chr3 | 88981304 | 88981622 |

|      |          |          |
|------|----------|----------|
| chr3 | 89225823 | 89226278 |
| chr3 | 89243033 | 89243382 |
| chr3 | 89519279 | 89519818 |
| chr3 | 89522522 | 89522801 |
| chr3 | 89577478 | 89577991 |
| chr3 | 89883819 | 89884354 |
| chr3 | 89887030 | 89887528 |
| chr3 | 89892234 | 89893145 |
| chr3 | 89895607 | 89896038 |
| chr3 | 90056249 | 90056388 |
| chr3 | 90063002 | 90063262 |
| chr3 | 90064485 | 90065225 |
| chr3 | 90070433 | 90070764 |
| chr3 | 90083818 | 90084019 |
| chr3 | 90097062 | 90098243 |
| chr3 | 90151179 | 90151448 |
| chr3 | 90417665 | 90417983 |
| chr3 | 90903221 | 90903309 |
| chr3 | 92493280 | 92493510 |
| chr3 | 94251678 | 94252035 |
| chr3 | 94642056 | 94642301 |
| chr3 | 94668051 | 94668288 |
| chr3 | 94764017 | 94764459 |
| chr3 | 94808961 | 94809272 |
| chr3 | 94926527 | 94926827 |
| chr3 | 94976096 | 94976546 |
| chr3 | 94977335 | 94977715 |
| chr3 | 95033382 | 95033601 |
| chr3 | 95238546 | 95238808 |
| chr3 | 95300576 | 95300822 |
| chr3 | 95462446 | 95464086 |
| chr3 | 95481669 | 95482060 |
| chr3 | 95622586 | 95622787 |
| chr3 | 95685693 | 95685913 |
| chr3 | 95908490 | 95909044 |
| chr3 | 95935490 | 95935863 |
| chr3 | 95980283 | 95980463 |
| chr3 | 96052573 | 96052698 |
| chr3 | 96073642 | 96074162 |
| chr3 | 96125998 | 96126117 |
| chr3 | 96132346 | 96132574 |
| chr3 | 96136655 | 96136775 |
| chr3 | 96150591 | 96150719 |

|      |           |           |
|------|-----------|-----------|
| chr3 | 96177941  | 96178156  |
| chr3 | 96186827  | 96186956  |
| chr3 | 96206137  | 96206257  |
| chr3 | 96213987  | 96214233  |
| chr3 | 96226651  | 96226864  |
| chr3 | 96232156  | 96232275  |
| chr3 | 96239891  | 96240017  |
| chr3 | 96254367  | 96254581  |
| chr3 | 96255366  | 96255471  |
| chr3 | 96256414  | 96256540  |
| chr3 | 96283322  | 96283426  |
| chr3 | 96292648  | 96292862  |
| chr3 | 96301699  | 96301829  |
| chr3 | 96361882  | 96365872  |
| chr3 | 96531663  | 96531954  |
| chr3 | 96562480  | 96562630  |
| chr3 | 96961997  | 96962129  |
| chr3 | 96962753  | 96963406  |
| chr3 | 96970211  | 96971029  |
| chr3 | 97817756  | 97818008  |
| chr3 | 97887958  | 97888506  |
| chr3 | 97894260  | 97894362  |
| chr3 | 101150108 | 101150198 |
| chr3 | 101181778 | 101182404 |
| chr3 | 101265426 | 101265684 |
| chr3 | 101276237 | 101276437 |
| chr3 | 102832657 | 102833012 |
| chr3 | 102914009 | 102914813 |
| chr3 | 102949649 | 102950073 |
| chr3 | 103084083 | 103084687 |
| chr3 | 103139725 | 103139997 |
| chr3 | 103231358 | 103231513 |
| chr3 | 103395382 | 103395500 |
| chr3 | 103718719 | 103719040 |
| chr3 | 103798368 | 103798474 |
| chr3 | 104442620 | 104443015 |
| chr3 | 104453253 | 104453506 |
| chr3 | 104668031 | 104668384 |
| chr3 | 104808794 | 104809006 |
| chr3 | 106525028 | 106525328 |
| chr3 | 108115829 | 108116010 |
| chr3 | 108186784 | 108187521 |
| chr3 | 108187781 | 108188537 |

|      |           |           |
|------|-----------|-----------|
| chr3 | 108189062 | 108189558 |
| chr3 | 109666719 | 109666827 |
| chr3 | 116298031 | 116298246 |
| chr3 | 118266034 | 118266181 |
| chr3 | 121129746 | 121130921 |
| chr3 | 121138277 | 121138962 |
| chr3 | 121156181 | 121156795 |
| chr3 | 121160770 | 121161031 |
| chr3 | 121948584 | 121949318 |
| chr3 | 121996571 | 121996823 |
| chr3 | 122142029 | 122142417 |
| chr3 | 122146865 | 122147064 |
| chr3 | 122192732 | 122193419 |
| chr3 | 122201406 | 122201831 |
| chr3 | 122223862 | 122224251 |
| chr3 | 123020762 | 123021077 |
| chr3 | 126808949 | 126809126 |
| chr3 | 127265627 | 127265868 |
| chr3 | 127316912 | 127317024 |
| chr3 | 129213700 | 129213800 |
| chr3 | 129235668 | 129236415 |
| chr3 | 129236426 | 129237807 |
| chr3 | 129246875 | 129248053 |
| chr3 | 129771309 | 129771512 |
| chr3 | 129908387 | 129908514 |
| chr3 | 131807396 | 131807598 |
| chr3 | 132355363 | 132355465 |
| chr3 | 133003459 | 133003866 |
| chr3 | 134436698 | 134436786 |
| chr3 | 134912189 | 134912366 |
| chr3 | 135021820 | 135022103 |
| chr3 | 135027609 | 135027771 |
| chr3 | 135101249 | 135103211 |
| chr3 | 135184465 | 135184558 |
| chr3 | 135193004 | 135193202 |
| chr3 | 136333075 | 136333549 |
| chr3 | 136333632 | 136334089 |
| chr3 | 136358962 | 136359112 |
| chr3 | 136384183 | 136384427 |
| chr3 | 136416584 | 136416682 |
| chr3 | 137378660 | 137378769 |
| chr3 | 137527554 | 137528300 |
| chr3 | 137581587 | 137581962 |

|      |           |           |
|------|-----------|-----------|
| chr3 | 138107274 | 138107362 |
| chr3 | 138115321 | 138115762 |
| chr3 | 138190205 | 138191185 |
| chr3 | 138406216 | 138407631 |
| chr3 | 138413543 | 138414497 |
| chr3 | 142408944 | 142409149 |
| chr3 | 144259782 | 144260398 |
| chr3 | 145651653 | 145651882 |
| chr3 | 148691894 | 148692027 |
| chr3 | 148715517 | 148715820 |
| chr3 | 151271325 | 151271460 |
| chr3 | 151873497 | 151874322 |
| chr3 | 151875436 | 151875952 |
| chr3 | 151892746 | 151893176 |
| chr3 | 152047244 | 152047424 |
| chr3 | 152059128 | 152060180 |
| chr3 | 156225337 | 156225541 |
| chr4 | 3866241   | 3866456   |
| chr4 | 6381091   | 6381276   |
| chr4 | 7318913   | 7318999   |
| chr4 | 8462807   | 8463123   |
| chr4 | 8618017   | 8618508   |
| chr4 | 8618587   | 8619091   |
| chr4 | 8664839   | 8664970   |
| chr4 | 10801208  | 10801340  |
| chr4 | 11083592  | 11084094  |
| chr4 | 11098285  | 11099488  |
| chr4 | 11500248  | 11500841  |
| chr4 | 12022042  | 12022258  |
| chr4 | 12041221  | 12041463  |
| chr4 | 12067593  | 12067832  |
| chr4 | 15192919  | 15194120  |
| chr4 | 15310329  | 15310430  |
| chr4 | 16603068  | 16603209  |
| chr4 | 21749382  | 21749476  |
| chr4 | 21858538  | 21858771  |
| chr4 | 22285152  | 22285549  |
| chr4 | 22324415  | 22324903  |
| chr4 | 24432065  | 24432401  |
| chr4 | 24454225  | 24454427  |
| chr4 | 24520725  | 24521041  |
| chr4 | 24534695  | 24535048  |
| chr4 | 24825457  | 24825660  |

|      |          |          |
|------|----------|----------|
| chr4 | 27627816 | 27627948 |
| chr4 | 27831919 | 27832048 |
| chr4 | 29512415 | 29512780 |
| chr4 | 32051003 | 32051396 |
| chr4 | 32704342 | 32704594 |
| chr4 | 32783765 | 32784642 |
| chr4 | 33051751 | 33051896 |
| chr4 | 33525680 | 33525767 |
| chr4 | 33553349 | 33553526 |
| chr4 | 34497920 | 34498771 |
| chr4 | 40669623 | 40669936 |
| chr4 | 41082550 | 41083379 |
| chr4 | 41321835 | 41321972 |
| chr4 | 41738565 | 41738670 |
| chr4 | 42963050 | 42963645 |
| chr4 | 42970458 | 42970656 |
| chr4 | 43071883 | 43072565 |
| chr4 | 43132418 | 43132689 |
| chr4 | 43395032 | 43395399 |
| chr4 | 43597166 | 43597652 |
| chr4 | 43644517 | 43645034 |
| chr4 | 43682437 | 43682741 |
| chr4 | 43888983 | 43889187 |
| chr4 | 43970694 | 43970941 |
| chr4 | 44363911 | 44364227 |
| chr4 | 44372995 | 44373263 |
| chr4 | 44837739 | 44837991 |
| chr4 | 44851771 | 44852053 |
| chr4 | 44938426 | 44938855 |
| chr4 | 45355613 | 45355848 |
| chr4 | 46463780 | 46464109 |
| chr4 | 46464212 | 46465885 |
| chr4 | 46508027 | 46508209 |
| chr4 | 47366436 | 47366704 |
| chr4 | 48598000 | 48598496 |
| chr4 | 48641695 | 48642585 |
| chr4 | 48694163 | 48694255 |
| chr4 | 49302180 | 49302297 |
| chr4 | 52463686 | 52463857 |
| chr4 | 52494371 | 52494607 |
| chr4 | 53361374 | 53361480 |
| chr4 | 53453279 | 53454444 |
| chr4 | 53849492 | 53849848 |

|      |          |          |
|------|----------|----------|
| chr4 | 53873541 | 53873689 |
| chr4 | 54958533 | 54958970 |
| chr4 | 54960063 | 54960769 |
| chr4 | 54968052 | 54968347 |
| chr4 | 55362948 | 55363741 |
| chr4 | 55383105 | 55383385 |
| chr4 | 57880412 | 57880658 |
| chr4 | 59202162 | 59202625 |
| chr4 | 59213736 | 59214248 |
| chr4 | 59234104 | 59234329 |
| chr4 | 59639218 | 59639353 |
| chr4 | 59639424 | 59639834 |
| chr4 | 61925359 | 61925457 |
| chr4 | 61956459 | 61956652 |
| chr4 | 62021734 | 62021959 |
| chr4 | 62049810 | 62050553 |
| chr4 | 62084976 | 62085071 |
| chr4 | 67685573 | 67685660 |
| chr4 | 74025673 | 74026009 |
| chr4 | 75167453 | 75167545 |
| chr4 | 79649794 | 79649925 |
| chr4 | 82975212 | 82975313 |
| chr4 | 83064995 | 83065087 |
| chr4 | 83334924 | 83335042 |
| chr4 | 84851516 | 84852098 |
| chr4 | 84852615 | 84852813 |
| chr4 | 84865497 | 84865988 |
| chr4 | 84923541 | 84923803 |
| chr4 | 84936251 | 84936388 |
| chr4 | 84983262 | 84983479 |
| chr4 | 85648897 | 85649090 |
| chr4 | 86124445 | 86124565 |
| chr4 | 86451042 | 86451291 |
| chr4 | 87078192 | 87078297 |
| chr4 | 87747741 | 87747995 |
| chr4 | 87811525 | 87811726 |
| chr4 | 87826712 | 87826831 |
| chr4 | 87893455 | 87893738 |
| chr4 | 87997402 | 87997875 |
| chr4 | 88794274 | 88794527 |
| chr4 | 88941209 | 88941404 |
| chr4 | 88948676 | 88949283 |
| chr4 | 88956261 | 88957028 |

|      |           |           |
|------|-----------|-----------|
| chr4 | 89055597  | 89055952  |
| chr4 | 89090940  | 89091155  |
| chr4 | 93001879  | 93002050  |
| chr4 | 93002228  | 93002548  |
| chr4 | 94341974  | 94342104  |
| chr4 | 94745928  | 94746148  |
| chr4 | 95224367  | 95224486  |
| chr4 | 95291579  | 95291866  |
| chr4 | 95476316  | 95476518  |
| chr4 | 95524189  | 95524277  |
| chr4 | 98393931  | 98394314  |
| chr4 | 98399436  | 98399820  |
| chr4 | 98590627  | 98590969  |
| chr4 | 99394680  | 99394980  |
| chr4 | 100754884 | 100755148 |
| chr4 | 101028646 | 101028923 |
| chr4 | 101092451 | 101093370 |
| chr4 | 101125202 | 101125669 |
| chr4 | 101137649 | 101138211 |
| chr4 | 101175326 | 101175726 |
| chr4 | 101181199 | 101181824 |
| chr4 | 101295610 | 101295879 |
| chr4 | 101330656 | 101331015 |
| chr4 | 101331503 | 101331761 |
| chr4 | 102791594 | 102792699 |
| chr4 | 102826177 | 102826298 |
| chr4 | 102836773 | 102836883 |
| chr4 | 103033873 | 103034146 |
| chr4 | 104040590 | 104041036 |
| chr4 | 104519665 | 104519771 |
| chr4 | 104834160 | 104834250 |
| chr4 | 105917870 | 105918771 |
| chr4 | 106040375 | 106040479 |
| chr4 | 106110129 | 106110686 |
| chr4 | 106233649 | 106234003 |
| chr4 | 106260241 | 106261596 |
| chr4 | 106584098 | 106584782 |
| chr4 | 106682317 | 106683105 |
| chr4 | 106851322 | 106851653 |
| chr4 | 107040588 | 107040921 |
| chr4 | 107071010 | 107071528 |
| chr4 | 107174949 | 107175139 |
| chr4 | 107246562 | 107246881 |



|      |           |           |
|------|-----------|-----------|
| chr4 | 107479843 | 107480100 |
| chr4 | 107567386 | 107567663 |
| chr4 | 107838144 | 107838373 |
| chr4 | 108004976 | 108005268 |
| chr4 | 108132621 | 108133188 |
| chr4 | 108252078 | 108252577 |
| chr4 | 108292685 | 108292989 |
| chr4 | 108297735 | 108298085 |
| chr4 | 108513417 | 108513566 |
| chr4 | 108520754 | 108520963 |
| chr4 | 108534455 | 108534684 |
| chr4 | 108673259 | 108673493 |
| chr4 | 108733628 | 108733876 |
| chr4 | 108953000 | 108953562 |
| chr4 | 108984908 | 108985018 |
| chr4 | 108993739 | 108993955 |
| chr4 | 109349201 | 109349387 |
| chr4 | 109352375 | 109352731 |
| chr4 | 109527380 | 109527604 |
| chr4 | 109632307 | 109632438 |
| chr4 | 115411048 | 115411288 |
| chr4 | 116247950 | 116248172 |
| chr4 | 116255096 | 116255375 |
| chr4 | 116719889 | 116720381 |
| chr4 | 116862549 | 116862719 |
| chr4 | 116875132 | 116875305 |
| chr4 | 116883448 | 116883619 |
| chr4 | 117223009 | 117223752 |
| chr4 | 117229171 | 117229436 |
| chr4 | 117230912 | 117231326 |
| chr4 | 117241747 | 117242074 |
| chr4 | 117287873 | 117289429 |
| chr4 | 117316973 | 117317278 |
| chr4 | 117317829 | 117318367 |
| chr4 | 117344594 | 117345015 |
| chr4 | 117422413 | 117422496 |
| chr4 | 118781407 | 118782137 |
| chr4 | 118808810 | 118809978 |
| chr4 | 118905557 | 118906015 |
| chr4 | 118948538 | 118948631 |
| chr4 | 119200619 | 119200709 |
| chr4 | 119212303 | 119212708 |
| chr4 | 119212781 | 119213111 |

|      |           |           |
|------|-----------|-----------|
| chr4 | 119292622 | 119293087 |
| chr4 | 120786830 | 120786917 |
| chr4 | 122726137 | 122726449 |
| chr4 | 122968583 | 122968763 |
| chr4 | 122970391 | 122970659 |
| chr4 | 123341092 | 123341333 |
| chr4 | 124406340 | 124406606 |
| chr4 | 124428916 | 124429533 |
| chr4 | 124442042 | 124442248 |
| chr4 | 124505266 | 124505416 |
| chr4 | 124510923 | 124511286 |
| chr4 | 124515948 | 124516061 |
| chr4 | 125167434 | 125170879 |
| chr4 | 125210167 | 125211692 |
| chr4 | 125240808 | 125242624 |
| chr4 | 125249631 | 125250279 |
| chr4 | 125309768 | 125310307 |
| chr4 | 125310534 | 125310736 |
| chr4 | 125781562 | 125781859 |
| chr4 | 125816437 | 125817141 |
| chr4 | 125825756 | 125826083 |
| chr4 | 126698566 | 126699796 |
| chr4 | 126709819 | 126710574 |
| chr4 | 126754645 | 126755094 |
| chr4 | 126804037 | 126804328 |
| chr4 | 126924669 | 126924953 |
| chr4 | 128561014 | 128561429 |
| chr4 | 128671612 | 128671897 |
| chr4 | 128735394 | 128736102 |
| chr4 | 128881789 | 128882133 |
| chr4 | 129058609 | 129058839 |
| chr4 | 129190879 | 129191250 |
| chr4 | 129497439 | 129498703 |
| chr4 | 129502624 | 129503029 |
| chr4 | 129784927 | 129785094 |
| chr4 | 130055575 | 130055747 |
| chr4 | 130125508 | 130125780 |
| chr4 | 130219316 | 130220431 |
| chr4 | 130227336 | 130227818 |
| chr4 | 130305423 | 130305897 |
| chr4 | 130330807 | 130331882 |
| chr4 | 130337125 | 130337440 |
| chr4 | 130469065 | 130469385 |

|      |           |           |
|------|-----------|-----------|
| chr4 | 130491027 | 130491684 |
| chr4 | 131429403 | 131430747 |
| chr4 | 131837101 | 131837352 |
| chr4 | 131844978 | 131845329 |
| chr4 | 131865249 | 131865573 |
| chr4 | 131865659 | 131866480 |
| chr4 | 131866511 | 131866818 |
| chr4 | 131997964 | 131998067 |
| chr4 | 132195078 | 132195409 |
| chr4 | 132269031 | 132269420 |
| chr4 | 132280136 | 132280588 |
| chr4 | 132333841 | 132334342 |
| chr4 | 132567511 | 132568075 |
| chr4 | 132569000 | 132569914 |
| chr4 | 132576053 | 132577263 |
| chr4 | 132582472 | 132583117 |
| chr4 | 132594362 | 132595714 |
| chr4 | 132603941 | 132604626 |
| chr4 | 132619219 | 132620429 |
| chr4 | 132700606 | 132700904 |
| chr4 | 132701264 | 132701582 |
| chr4 | 132712346 | 132712651 |
| chr4 | 132750221 | 132750792 |
| chr4 | 132925688 | 132926936 |
| chr4 | 132979078 | 132979538 |
| chr4 | 133075064 | 133075376 |
| chr4 | 133513824 | 133514051 |
| chr4 | 133523219 | 133523759 |
| chr4 | 133523874 | 133524604 |
| chr4 | 133843496 | 133843773 |
| chr4 | 134479548 | 134480410 |
| chr4 | 134481630 | 134482393 |
| chr4 | 135412069 | 135412816 |
| chr4 | 135415349 | 135415774 |
| chr4 | 135728634 | 135728947 |
| chr4 | 135866892 | 135867598 |
| chr4 | 136025677 | 136026876 |
| chr4 | 136051085 | 136052093 |
| chr4 | 136085743 | 136085834 |
| chr4 | 136101944 | 136102478 |
| chr4 | 136881470 | 136881563 |
| chr4 | 137024670 | 137026681 |
| chr4 | 137063897 | 137064630 |

|      |           |           |
|------|-----------|-----------|
| chr4 | 137085084 | 137085558 |
| chr4 | 137099054 | 137100075 |
| chr4 | 137103943 | 137104443 |
| chr4 | 137116856 | 137117216 |
| chr4 | 137120677 | 137120978 |
| chr4 | 137125201 | 137126690 |
| chr4 | 137150059 | 137151274 |
| chr4 | 137152813 | 137154233 |
| chr4 | 137158377 | 137160445 |
| chr4 | 137173986 | 137177393 |
| chr4 | 137213173 | 137214646 |
| chr4 | 137549300 | 137550435 |
| chr4 | 137554868 | 137555214 |
| chr4 | 137579082 | 137579329 |
| chr4 | 137591493 | 137591757 |
| chr4 | 137772492 | 137773756 |
| chr4 | 137860726 | 137860924 |
| chr4 | 137866369 | 137867373 |
| chr4 | 137996347 | 137996564 |
| chr4 | 138010241 | 138011139 |
| chr4 | 138092981 | 138093473 |
| chr4 | 138104684 | 138105105 |
| chr4 | 138110396 | 138110641 |
| chr4 | 138115578 | 138116505 |
| chr4 | 138125663 | 138126220 |
| chr4 | 138134381 | 138134830 |
| chr4 | 138748845 | 138750227 |
| chr4 | 138755056 | 138756932 |
| chr4 | 138777895 | 138778415 |
| chr4 | 138822042 | 138823239 |
| chr4 | 138845062 | 138846125 |
| chr4 | 138958390 | 138958596 |
| chr4 | 138987375 | 138987799 |
| chr4 | 139188033 | 139188324 |
| chr4 | 139204252 | 139204688 |
| chr4 | 139506812 | 139506907 |
| chr4 | 140258198 | 140259324 |
| chr4 | 140269556 | 140270899 |
| chr4 | 140276924 | 140277792 |
| chr4 | 140277796 | 140278693 |
| chr4 | 140463376 | 140463583 |
| chr4 | 140561917 | 140562721 |
| chr4 | 140703923 | 140704673 |

|      |           |           |
|------|-----------|-----------|
| chr4 | 140734927 | 140735318 |
| chr4 | 140857158 | 140857725 |
| chr4 | 140857734 | 140858994 |
| chr4 | 140884079 | 140885083 |
| chr4 | 145024486 | 145024955 |
| chr4 | 145028722 | 145029082 |
| chr4 | 145029562 | 145030264 |
| chr4 | 145038965 | 145039161 |
| chr4 | 145109101 | 145109288 |
| chr4 | 145116057 | 145116450 |
| chr4 | 145127862 | 145128104 |
| chr4 | 145184095 | 145184351 |
| chr4 | 145198212 | 145198304 |
| chr4 | 145268048 | 145268348 |
| chr4 | 145381132 | 145381307 |
| chr4 | 145391580 | 145391677 |
| chr4 | 146068430 | 146068618 |
| chr4 | 146140946 | 146141077 |
| chr4 | 146247540 | 146247684 |
| chr4 | 146349175 | 146349409 |
| chr4 | 146514958 | 146515229 |
| chr4 | 146523237 | 146523368 |
| chr4 | 146607807 | 146607916 |
| chr4 | 146616272 | 146616505 |
| chr4 | 146622576 | 146622675 |
| chr4 | 146622925 | 146623080 |
| chr4 | 146693605 | 146693740 |
| chr4 | 146756909 | 146757015 |
| chr4 | 146826829 | 146827207 |
| chr4 | 146831984 | 146832427 |
| chr4 | 146853147 | 146853538 |
| chr4 | 146937898 | 146938284 |
| chr4 | 146944578 | 146944711 |
| chr4 | 147315053 | 147315997 |
| chr4 | 147320547 | 147321074 |
| chr4 | 148179434 | 148179728 |
| chr4 | 148871536 | 148871955 |
| chr4 | 148892604 | 148893025 |
| chr4 | 148960586 | 148961585 |
| chr4 | 148996688 | 148996990 |
| chr4 | 149021485 | 149022059 |
| chr4 | 149191830 | 149191973 |
| chr4 | 149414717 | 149415019 |

|      |           |           |
|------|-----------|-----------|
| chr4 | 149442746 | 149443566 |
| chr4 | 149611362 | 149611642 |
| chr4 | 149655646 | 149656808 |
| chr4 | 149718148 | 149719132 |
| chr4 | 149746170 | 149746384 |
| chr4 | 149910961 | 149911320 |
| chr4 | 149973642 | 149974181 |
| chr4 | 149988689 | 149989938 |
| chr4 | 150028279 | 150028494 |
| chr4 | 150229311 | 150229647 |
| chr4 | 151348738 | 151349188 |
| chr4 | 151488035 | 151488563 |
| chr4 | 151552830 | 151552996 |
| chr4 | 151671230 | 151671547 |
| chr4 | 151699963 | 151700464 |
| chr4 | 151707211 | 151708062 |
| chr4 | 151899077 | 151899432 |
| chr4 | 152527152 | 152527329 |
| chr4 | 153332022 | 153332285 |
| chr4 | 153333521 | 153333778 |
| chr4 | 153523068 | 153523445 |
| chr4 | 153611178 | 153611307 |
| chr4 | 153634630 | 153634911 |
| chr4 | 154282778 | 154282871 |
| chr4 | 154865446 | 154866533 |
| chr4 | 154866575 | 154866788 |
| chr4 | 154876154 | 154876864 |
| chr4 | 154928983 | 154929392 |
| chr4 | 154932307 | 154932566 |
| chr4 | 154963799 | 154963928 |
| chr4 | 154975927 | 154976384 |
| chr4 | 155177762 | 155178134 |
| chr4 | 155193810 | 155194597 |
| chr4 | 155221572 | 155222270 |
| chr4 | 155228768 | 155229140 |
| chr4 | 155230814 | 155231082 |
| chr4 | 155231964 | 155232445 |
| chr4 | 155317999 | 155318242 |
| chr4 | 155327285 | 155327802 |
| chr4 | 155380087 | 155380279 |
| chr4 | 155494092 | 155495406 |
| chr4 | 155610065 | 155610755 |
| chr5 | 3461478   | 3461706   |

|      |          |          |
|------|----------|----------|
| chr5 | 3549597  | 3549828  |
| chr5 | 3578400  | 3578705  |
| chr5 | 3954110  | 3954341  |
| chr5 | 8426209  | 8426479  |
| chr5 | 8808756  | 8809001  |
| chr5 | 8833401  | 8833783  |
| chr5 | 9101023  | 9101291  |
| chr5 | 10193027 | 10193235 |
| chr5 | 18768537 | 18768714 |
| chr5 | 18775997 | 18776959 |
| chr5 | 20389966 | 20390093 |
| chr5 | 20930852 | 20931148 |
| chr5 | 21151805 | 21152023 |
| chr5 | 21295175 | 21295536 |
| chr5 | 22940385 | 22940604 |
| chr5 | 22950512 | 22950799 |
| chr5 | 23181984 | 23182205 |
| chr5 | 23356405 | 23356841 |
| chr5 | 23358025 | 23358144 |
| chr5 | 23979814 | 23980395 |
| chr5 | 24092577 | 24093023 |
| chr5 | 24093579 | 24094020 |
| chr5 | 25266206 | 25266546 |
| chr5 | 25274675 | 25275205 |
| chr5 | 25316536 | 25316787 |
| chr5 | 28397935 | 28398369 |
| chr5 | 28643949 | 28644227 |
| chr5 | 28716105 | 28716345 |
| chr5 | 28744758 | 28745247 |
| chr5 | 29864956 | 29865063 |
| chr5 | 29961603 | 29961731 |
| chr5 | 30969273 | 30969628 |
| chr5 | 30970713 | 30971310 |
| chr5 | 30971635 | 30972863 |
| chr5 | 31190458 | 31190610 |
| chr5 | 31190881 | 31191081 |
| chr5 | 31357157 | 31357425 |
| chr5 | 31475811 | 31475903 |
| chr5 | 31554186 | 31554472 |
| chr5 | 31873746 | 31874244 |
| chr5 | 32040523 | 32040799 |
| chr5 | 32205909 | 32206321 |
| chr5 | 32249597 | 32250234 |

|      |          |          |
|------|----------|----------|
| chr5 | 32438491 | 32439072 |
| chr5 | 32477493 | 32477600 |
| chr5 | 32761434 | 32762122 |
| chr5 | 32913620 | 32913779 |
| chr5 | 32913818 | 32914186 |
| chr5 | 32920196 | 32920632 |
| chr5 | 33073662 | 33073858 |
| chr5 | 33324745 | 33324973 |
| chr5 | 33361798 | 33362350 |
| chr5 | 33678311 | 33679000 |
| chr5 | 33687201 | 33687767 |
| chr5 | 34007879 | 34008137 |
| chr5 | 34679081 | 34679766 |
| chr5 | 34694199 | 34695251 |
| chr5 | 34712432 | 34713539 |
| chr5 | 34763563 | 34763729 |
| chr5 | 34803790 | 34804096 |
| chr5 | 34810894 | 34811225 |
| chr5 | 35104823 | 35105003 |
| chr5 | 35160334 | 35160750 |
| chr5 | 35208111 | 35208370 |
| chr5 | 36325200 | 36325323 |
| chr5 | 36345184 | 36345630 |
| chr5 | 36808167 | 36808353 |
| chr5 | 37259795 | 37260373 |
| chr5 | 37260851 | 37261449 |
| chr5 | 37271423 | 37271985 |
| chr5 | 37296606 | 37297112 |
| chr5 | 38447584 | 38447811 |
| chr5 | 38611711 | 38612129 |
| chr5 | 38623839 | 38624036 |
| chr5 | 38937694 | 38937815 |
| chr5 | 48410630 | 48410853 |
| chr5 | 53196091 | 53196414 |
| chr5 | 53975077 | 53976050 |
| chr5 | 53980023 | 53983275 |
| chr5 | 53993807 | 53994125 |
| chr5 | 53995580 | 53996560 |
| chr5 | 54010070 | 54010906 |
| chr5 | 54033394 | 54033835 |
| chr5 | 54054677 | 54054808 |
| chr5 | 54231128 | 54231327 |
| chr5 | 54389684 | 54390230 |



|      |          |          |
|------|----------|----------|
| chr5 | 60434070 | 60434174 |
| chr5 | 64801953 | 64802342 |
| chr5 | 64808376 | 64808786 |
| chr5 | 64822246 | 64822446 |
| chr5 | 65194681 | 65195717 |
| chr5 | 65928599 | 65929225 |
| chr5 | 65938580 | 65939035 |
| chr5 | 65952334 | 65952967 |
| chr5 | 65953008 | 65953343 |
| chr5 | 65953866 | 65954383 |
| chr5 | 66155720 | 66156110 |
| chr5 | 66179222 | 66179308 |
| chr5 | 66219749 | 66219979 |
| chr5 | 66221004 | 66221187 |
| chr5 | 67067668 | 67068295 |
| chr5 | 67681615 | 67681741 |
| chr5 | 67871083 | 67871843 |
| chr5 | 70117703 | 70117793 |
| chr5 | 70310333 | 70310432 |
| chr5 | 73365699 | 73365869 |
| chr5 | 73684025 | 73684477 |
| chr5 | 73699766 | 73699981 |
| chr5 | 73882763 | 73883077 |
| chr5 | 74489163 | 74489718 |
| chr5 | 74931538 | 74931980 |
| chr5 | 75970988 | 75972197 |
| chr5 | 75990125 | 75991031 |
| chr5 | 75992164 | 75992688 |
| chr5 | 76050293 | 76051051 |
| chr5 | 76052016 | 76052795 |
| chr5 | 76612978 | 76613362 |
| chr5 | 76618765 | 76619077 |
| chr5 | 76997152 | 76997323 |
| chr5 | 77694385 | 77695985 |
| chr5 | 87233284 | 87233933 |
| chr5 | 87239718 | 87239837 |
| chr5 | 88994278 | 88994932 |
| chr5 | 89041521 | 89041792 |
| chr5 | 89149938 | 89150403 |
| chr5 | 89150505 | 89151258 |
| chr5 | 89189961 | 89190200 |
| chr5 | 89965258 | 89965370 |
| chr5 | 92567048 | 92567632 |

|      |           |           |
|------|-----------|-----------|
| chr5 | 93370772  | 93371210  |
| chr5 | 93522499  | 93523083  |
| chr5 | 93539122  | 93539227  |
| chr5 | 96296368  | 96296472  |
| chr5 | 96678371  | 96678989  |
| chr5 | 96687918  | 96688667  |
| chr5 | 97903697  | 97903796  |
| chr5 | 104121192 | 104122273 |
| chr5 | 104132546 | 104132921 |
| chr5 | 104151773 | 104152357 |
| chr5 | 104166482 | 104167859 |
| chr5 | 104182890 | 104183765 |
| chr5 | 104247019 | 104247341 |
| chr5 | 104501331 | 104501579 |
| chr5 | 104864149 | 104864261 |
| chr5 | 104868288 | 104868548 |
| chr5 | 104869305 | 104869686 |
| chr5 | 104869693 | 104870048 |
| chr5 | 104888672 | 104889441 |
| chr5 | 105000773 | 105000874 |
| chr5 | 106010415 | 106010504 |
| chr5 | 106129464 | 106129991 |
| chr5 | 106176361 | 106176984 |
| chr5 | 107922536 | 107922781 |
| chr5 | 108064767 | 108065071 |
| chr5 | 108333317 | 108333730 |
| chr5 | 108334138 | 108334864 |
| chr5 | 108336362 | 108336545 |
| chr5 | 108494277 | 108495185 |
| chr5 | 108526359 | 108527793 |
| chr5 | 108658950 | 108659194 |
| chr5 | 108698088 | 108698574 |
| chr5 | 108746444 | 108746769 |
| chr5 | 109066344 | 109066649 |
| chr5 | 110600008 | 110600251 |
| chr5 | 110660083 | 110660414 |
| chr5 | 110715385 | 110715660 |
| chr5 | 110724075 | 110724701 |
| chr5 | 110734017 | 110734411 |
| chr5 | 110903076 | 110903243 |
| chr5 | 110920823 | 110920995 |
| chr5 | 111186128 | 111186237 |
| chr5 | 111281514 | 111281766 |

|      |           |           |
|------|-----------|-----------|
| chr5 | 111292788 | 111293099 |
| chr5 | 111335962 | 111336194 |
| chr5 | 111816542 | 111817291 |
| chr5 | 112705823 | 112706343 |
| chr5 | 112712486 | 112712893 |
| chr5 | 113473162 | 113473294 |
| chr5 | 113657260 | 113657452 |
| chr5 | 114550372 | 114550631 |
| chr5 | 114557223 | 114557351 |
| chr5 | 114830853 | 114831095 |
| chr5 | 114839227 | 114839361 |
| chr5 | 115050368 | 115050496 |
| chr5 | 115224989 | 115225268 |
| chr5 | 115225793 | 115225894 |
| chr5 | 115461127 | 115461667 |
| chr5 | 115485483 | 115486252 |
| chr5 | 115654579 | 115654804 |
| chr5 | 115737437 | 115737797 |
| chr5 | 115880013 | 115880612 |
| chr5 | 115903915 | 115904184 |
| chr5 | 115918601 | 115919344 |
| chr5 | 115939465 | 115939660 |
| chr5 | 115940260 | 115940462 |
| chr5 | 115957243 | 115957893 |
| chr5 | 115997908 | 115998378 |
| chr5 | 116033368 | 116034065 |
| chr5 | 116041005 | 116041618 |
| chr5 | 116043695 | 116044260 |
| chr5 | 116052155 | 116052980 |
| chr5 | 116295335 | 116295620 |
| chr5 | 116360361 | 116362388 |
| chr5 | 116373668 | 116374754 |
| chr5 | 116424765 | 116425082 |
| chr5 | 116436226 | 116436536 |
| chr5 | 117588440 | 117588869 |
| chr5 | 117723917 | 117724237 |
| chr5 | 117864369 | 117864474 |
| chr5 | 117864744 | 117864873 |
| chr5 | 118488439 | 118488754 |
| chr5 | 118620329 | 118620530 |
| chr5 | 118695534 | 118695861 |
| chr5 | 119010203 | 119011393 |
| chr5 | 119024816 | 119025428 |

|      |           |           |
|------|-----------|-----------|
| chr5 | 119078683 | 119079484 |
| chr5 | 119097971 | 119098446 |
| chr5 | 119108471 | 119109268 |
| chr5 | 119158102 | 119158577 |
| chr5 | 119181241 | 119181367 |
| chr5 | 119186864 | 119186953 |
| chr5 | 120120976 | 120121927 |
| chr5 | 120122014 | 120122493 |
| chr5 | 120130214 | 120131313 |
| chr5 | 120132537 | 120133703 |
| chr5 | 120589888 | 120590165 |
| chr5 | 121063118 | 121063265 |
| chr5 | 121654545 | 121655212 |
| chr5 | 121670259 | 121670438 |
| chr5 | 121848129 | 121848806 |
| chr5 | 122126988 | 122127112 |
| chr5 | 122161863 | 122163462 |
| chr5 | 122261236 | 122262523 |
| chr5 | 122303843 | 122304205 |
| chr5 | 122314601 | 122314691 |
| chr5 | 122325639 | 122325810 |
| chr5 | 122690866 | 122691096 |
| chr5 | 122734749 | 122735279 |
| chr5 | 122804460 | 122804668 |
| chr5 | 122872488 | 122872932 |
| chr5 | 123688484 | 123688607 |
| chr5 | 123823539 | 123823884 |
| chr5 | 123845685 | 123845949 |
| chr5 | 123895614 | 123896149 |
| chr5 | 124078208 | 124078320 |
| chr5 | 124218905 | 124219171 |
| chr5 | 124259257 | 124259663 |
| chr5 | 124269448 | 124269698 |
| chr5 | 124358762 | 124358892 |
| chr5 | 124388276 | 124388440 |
| chr5 | 124435158 | 124435476 |
| chr5 | 124725533 | 124725621 |
| chr5 | 124889979 | 124890687 |
| chr5 | 124895157 | 124896206 |
| chr5 | 124910780 | 124910888 |
| chr5 | 124954099 | 124954320 |
| chr5 | 124991039 | 124991617 |
| chr5 | 125034418 | 125034698 |

|      |           |           |
|------|-----------|-----------|
| chr5 | 125043996 | 125044306 |
| chr5 | 125343299 | 125344056 |
| chr5 | 125889839 | 125889963 |
| chr5 | 125921950 | 125922857 |
| chr5 | 127739846 | 127740056 |
| chr5 | 128180647 | 128180871 |
| chr5 | 129526108 | 129527000 |
| chr5 | 130007197 | 130008135 |
| chr5 | 130036351 | 130036620 |
| chr5 | 130061761 | 130062357 |
| chr5 | 130112162 | 130112907 |
| chr5 | 130231022 | 130231442 |
| chr5 | 130295413 | 130295753 |
| chr5 | 130300317 | 130300601 |
| chr5 | 130418177 | 130418845 |
| chr5 | 130436068 | 130436393 |
| chr5 | 130452828 | 130453522 |
| chr5 | 130698221 | 130698991 |
| chr5 | 130699767 | 130700136 |
| chr5 | 130710916 | 130711048 |
| chr5 | 130734583 | 130734677 |
| chr5 | 130734793 | 130734972 |
| chr5 | 131443504 | 131443646 |
| chr5 | 131511910 | 131512107 |
| chr5 | 131995601 | 131995694 |
| chr5 | 134680359 | 134680545 |
| chr5 | 135410970 | 135412037 |
| chr5 | 135515670 | 135516151 |
| chr5 | 135608156 | 135608830 |
| chr5 | 135608920 | 135609656 |
| chr5 | 135636629 | 135637960 |
| chr5 | 135663116 | 135663953 |
| chr5 | 135720627 | 135721152 |
| chr5 | 135846614 | 135846886 |
| chr5 | 136210807 | 136211191 |
| chr5 | 136254554 | 136254723 |
| chr5 | 136264820 | 136265175 |
| chr5 | 136466234 | 136466333 |
| chr5 | 136470805 | 136470986 |
| chr5 | 136677741 | 136677928 |
| chr5 | 137403709 | 137403798 |
| chr5 | 137463495 | 137463684 |
| chr5 | 137468927 | 137469273 |

|      |           |           |
|------|-----------|-----------|
| chr5 | 137472048 | 137472357 |
| chr5 | 137791268 | 137791913 |
| chr5 | 137951593 | 137951825 |
| chr5 | 137951966 | 137952688 |
| chr5 | 137968374 | 137969198 |
| chr5 | 138081234 | 138082266 |
| chr5 | 138188170 | 138188551 |
| chr5 | 138220255 | 138220713 |
| chr5 | 138542343 | 138542793 |
| chr5 | 138731789 | 138732695 |
| chr5 | 138740806 | 138741332 |
| chr5 | 138741413 | 138742161 |
| chr5 | 138749636 | 138750491 |
| chr5 | 138759189 | 138759577 |
| chr5 | 138765774 | 138766050 |
| chr5 | 138779809 | 138779976 |
| chr5 | 138786092 | 138786586 |
| chr5 | 138890668 | 138890932 |
| chr5 | 138893962 | 138894067 |
| chr5 | 138894700 | 138894988 |
| chr5 | 139676617 | 139677122 |
| chr5 | 139696079 | 139696695 |
| chr5 | 139697008 | 139697261 |
| chr5 | 139716804 | 139717564 |
| chr5 | 139919572 | 139919685 |
| chr5 | 140320882 | 140321161 |
| chr5 | 143590140 | 143590308 |
| chr5 | 143723374 | 143724647 |
| chr5 | 143733706 | 143734458 |
| chr5 | 143734501 | 143734819 |
| chr5 | 144165496 | 144165853 |
| chr5 | 144182224 | 144182885 |
| chr5 | 144383561 | 144383938 |
| chr5 | 144386857 | 144387304 |
| chr5 | 144408015 | 144408240 |
| chr5 | 144861312 | 144861935 |
| chr5 | 144936024 | 144936347 |
| chr5 | 144945699 | 144946645 |
| chr5 | 144947908 | 144948722 |
| chr5 | 145306767 | 145306902 |
| chr5 | 145458114 | 145458708 |
| chr5 | 145532200 | 145532438 |
| chr5 | 145551629 | 145552082 |

|      |           |           |
|------|-----------|-----------|
| chr5 | 145563918 | 145564655 |
| chr5 | 145580217 | 145580561 |
| chr5 | 145614843 | 145615311 |
| chr5 | 145994474 | 145994870 |
| chr5 | 145996074 | 145996627 |
| chr5 | 147042767 | 147042990 |
| chr5 | 147043071 | 147043415 |
| chr5 | 147099736 | 147100257 |
| chr5 | 147196850 | 147197186 |
| chr5 | 147276580 | 147277010 |
| chr5 | 147279819 | 147280126 |
| chr5 | 147646346 | 147646550 |
| chr5 | 147646664 | 147647011 |
| chr5 | 147760728 | 147761024 |
| chr5 | 147889116 | 147889348 |
| chr5 | 148241794 | 148242700 |
| chr5 | 148278879 | 148279129 |
| chr5 | 148296951 | 148297254 |
| chr5 | 149998155 | 149998469 |
| chr5 | 150480843 | 150481491 |
| chr5 | 151065652 | 151065956 |
| chr5 | 151328243 | 151328606 |
| chr5 | 151358399 | 151358693 |
| chr5 | 151476415 | 151476928 |
| chr5 | 151518029 | 151518134 |
| chr5 | 151534608 | 151534891 |
| chr5 | 152196871 | 152197090 |
| chr6 | 3470912   | 3471120   |
| chr6 | 3498370   | 3498804   |
| chr6 | 4485980   | 4486122   |
| chr6 | 4487844   | 4488087   |
| chr6 | 4490616   | 4491175   |
| chr6 | 4551056   | 4551187   |
| chr6 | 4697365   | 4697607   |
| chr6 | 4887691   | 4887929   |
| chr6 | 5111107   | 5111279   |
| chr6 | 6906245   | 6906514   |
| chr6 | 7794865   | 7795451   |
| chr6 | 8460039   | 8460350   |
| chr6 | 10050370  | 10050488  |
| chr6 | 11910353  | 11910446  |
| chr6 | 13019862  | 13020086  |
| chr6 | 13499505  | 13499637  |

|      |          |          |
|------|----------|----------|
| chr6 | 13815788 | 13816157 |
| chr6 | 17386305 | 17386445 |
| chr6 | 17413857 | 17414101 |
| chr6 | 17587056 | 17587637 |
| chr6 | 23469745 | 23469843 |
| chr6 | 28373606 | 28373863 |
| chr6 | 28373918 | 28374168 |
| chr6 | 28376492 | 28376601 |
| chr6 | 28430406 | 28430974 |
| chr6 | 28528425 | 28528821 |
| chr6 | 28695633 | 28695855 |
| chr6 | 28745921 | 28746776 |
| chr6 | 28782066 | 28783089 |
| chr6 | 29298149 | 29298504 |
| chr6 | 29324415 | 29325338 |
| chr6 | 29325392 | 29326612 |
| chr6 | 29338817 | 29338939 |
| chr6 | 29685559 | 29686224 |
| chr6 | 29702414 | 29702699 |
| chr6 | 29760223 | 29760518 |
| chr6 | 29998041 | 29999186 |
| chr6 | 30052362 | 30052741 |
| chr6 | 30070210 | 30070435 |
| chr6 | 30093271 | 30093354 |
| chr6 | 30329133 | 30329230 |
| chr6 | 30373079 | 30373839 |
| chr6 | 30754862 | 30755051 |
| chr6 | 31453074 | 31453338 |
| chr6 | 33201199 | 33201431 |
| chr6 | 33242933 | 33243617 |
| chr6 | 33261347 | 33261649 |
| chr6 | 33292340 | 33292712 |
| chr6 | 33302046 | 33302457 |
| chr6 | 33303900 | 33304182 |
| chr6 | 33309966 | 33311087 |
| chr6 | 33318784 | 33319760 |
| chr6 | 33320176 | 33321152 |
| chr6 | 33332987 | 33333387 |
| chr6 | 33350953 | 33351919 |
| chr6 | 33352120 | 33352989 |
| chr6 | 33370912 | 33371698 |
| chr6 | 33383309 | 33383652 |
| chr6 | 33392827 | 33393054 |



|      |          |          |
|------|----------|----------|
| chr6 | 33396636 | 33397706 |
| chr6 | 33412501 | 33413938 |
| chr6 | 33425394 | 33425530 |
| chr6 | 33427192 | 33427532 |
| chr6 | 33439625 | 33440301 |
| chr6 | 33465382 | 33465839 |
| chr6 | 33505175 | 33505669 |
| chr6 | 33511146 | 33511573 |
| chr6 | 33512914 | 33513112 |
| chr6 | 33538613 | 33539541 |
| chr6 | 33544993 | 33547393 |
| chr6 | 33555968 | 33556755 |
| chr6 | 33568694 | 33569069 |
| chr6 | 33576621 | 33576917 |
| chr6 | 33581618 | 33582299 |
| chr6 | 33582758 | 33583015 |
| chr6 | 33585805 | 33585973 |
| chr6 | 33623046 | 33623188 |
| chr6 | 33633077 | 33633952 |
| chr6 | 33663984 | 33664859 |
| chr6 | 33675305 | 33675402 |
| chr6 | 33713893 | 33714166 |
| chr6 | 33843539 | 33843787 |
| chr6 | 33893880 | 33894009 |
| chr6 | 34640413 | 34640676 |
| chr6 | 35188183 | 35188400 |
| chr6 | 35211246 | 35211548 |
| chr6 | 37756009 | 37756222 |
| chr6 | 37820779 | 37821702 |
| chr6 | 37871660 | 37872137 |
| chr6 | 37898913 | 37899360 |
| chr6 | 38384585 | 38384844 |
| chr6 | 38483925 | 38484057 |
| chr6 | 38501460 | 38502605 |
| chr6 | 38508015 | 38508933 |
| chr6 | 38545934 | 38546159 |
| chr6 | 38553939 | 38554627 |
| chr6 | 38558966 | 38559219 |
| chr6 | 39156820 | 39157022 |
| chr6 | 40421479 | 40421726 |
| chr6 | 42214955 | 42215296 |
| chr6 | 42231583 | 42232096 |
| chr6 | 43286248 | 43286387 |

|      |          |          |
|------|----------|----------|
| chr6 | 44167074 | 44167440 |
| chr6 | 47404656 | 47405215 |
| chr6 | 47545218 | 47545666 |
| chr6 | 47731621 | 47731774 |
| chr6 | 47855299 | 47855638 |
| chr6 | 48239224 | 48239336 |
| chr6 | 48576742 | 48577066 |
| chr6 | 50060581 | 50060884 |
| chr6 | 50516768 | 50517164 |
| chr6 | 51479247 | 51479349 |
| chr6 | 51634669 | 51634752 |
| chr6 | 52054264 | 52054425 |
| chr6 | 53383966 | 53384164 |
| chr6 | 54175017 | 54175427 |
| chr6 | 54767057 | 54767590 |
| chr6 | 54803302 | 54803682 |
| chr6 | 54834066 | 54834281 |
| chr6 | 54987998 | 54988506 |
| chr6 | 56782095 | 56782393 |
| chr6 | 56819156 | 56819441 |
| chr6 | 56828642 | 56829302 |
| chr6 | 58563332 | 58563481 |
| chr6 | 58610276 | 58610523 |
| chr6 | 58626545 | 58626687 |
| chr6 | 58634949 | 58635069 |
| chr6 | 60200810 | 60200931 |
| chr6 | 61130652 | 61130882 |
| chr6 | 64992697 | 64993164 |
| chr6 | 65013903 | 65014512 |
| chr6 | 65017659 | 65017861 |
| chr6 | 65757802 | 65758004 |
| chr6 | 65848740 | 65848928 |
| chr6 | 65858456 | 65858716 |
| chr6 | 66491069 | 66491271 |
| chr6 | 66739651 | 66739743 |
| chr6 | 66846771 | 66846970 |
| chr6 | 66894883 | 66895243 |
| chr6 | 67003239 | 67003508 |
| chr6 | 67217313 | 67218048 |
| chr6 | 67218051 | 67218349 |
| chr6 | 67259353 | 67259593 |
| chr6 | 69466334 | 69466585 |
| chr6 | 70805434 | 70805601 |

|      |          |          |
|------|----------|----------|
| chr6 | 71227617 | 71227760 |
| chr6 | 71444307 | 71444532 |
| chr6 | 71493963 | 71494543 |
| chr6 | 71781646 | 71781860 |
| chr6 | 72756955 | 72757081 |
| chr6 | 72850440 | 72850624 |
| chr6 | 73206712 | 73206818 |
| chr6 | 76582642 | 76582734 |
| chr6 | 81588303 | 81588509 |
| chr6 | 83004872 | 83005492 |
| chr6 | 83065544 | 83066000 |
| chr6 | 83067350 | 83067675 |
| chr6 | 83067734 | 83068132 |
| chr6 | 83138903 | 83139261 |
| chr6 | 83276035 | 83276257 |
| chr6 | 83292155 | 83292698 |
| chr6 | 83864418 | 83865358 |
| chr6 | 83902206 | 83902559 |
| chr6 | 83908866 | 83908954 |
| chr6 | 83909240 | 83909338 |
| chr6 | 83939010 | 83939190 |
| chr6 | 84040536 | 84040631 |
| chr6 | 85056918 | 85057561 |
| chr6 | 85417424 | 85417996 |
| chr6 | 85418105 | 85418348 |
| chr6 | 85537885 | 85538023 |
| chr6 | 85585857 | 85586419 |
| chr6 | 86353885 | 86354010 |
| chr6 | 86415511 | 86415633 |
| chr6 | 86476543 | 86476863 |
| chr6 | 86545372 | 86545598 |
| chr6 | 86888901 | 86889652 |
| chr6 | 86972370 | 86972552 |
| chr6 | 87040458 | 87040829 |
| chr6 | 87930789 | 87931128 |
| chr6 | 88034489 | 88034903 |
| chr6 | 88726930 | 88727422 |
| chr6 | 89713878 | 89713963 |
| chr6 | 90769232 | 90769315 |
| chr6 | 91214652 | 91214926 |
| chr6 | 91423739 | 91424287 |
| chr6 | 91634071 | 91634657 |
| chr6 | 91663277 | 91663607 |

|      |           |           |
|------|-----------|-----------|
| chr6 | 91707394  | 91708537  |
| chr6 | 91851376  | 91851473  |
| chr6 | 91975962  | 91976244  |
| chr6 | 91989289  | 91989726  |
| chr6 | 92041835  | 92042724  |
| chr6 | 92118148  | 92118436  |
| chr6 | 94530163  | 94530587  |
| chr6 | 94537928  | 94538048  |
| chr6 | 96542977  | 96543066  |
| chr6 | 97172297  | 97172583  |
| chr6 | 97680430  | 97680564  |
| chr6 | 98624664  | 98624754  |
| chr6 | 100783884 | 100784499 |
| chr6 | 102298533 | 102298617 |
| chr6 | 102647068 | 102647154 |
| chr6 | 106951444 | 106951583 |
| chr6 | 108163121 | 108163387 |
| chr6 | 108176151 | 108176490 |
| chr6 | 108210283 | 108210661 |
| chr6 | 108224068 | 108224887 |
| chr6 | 108259814 | 108260746 |
| chr6 | 108321071 | 108321608 |
| chr6 | 108322627 | 108323137 |
| chr6 | 108338283 | 108338808 |
| chr6 | 108343811 | 108344143 |
| chr6 | 108365157 | 108365463 |
| chr6 | 108386484 | 108387085 |
| chr6 | 108485765 | 108485919 |
| chr6 | 108733097 | 108733766 |
| chr6 | 108778443 | 108778822 |
| chr6 | 108778945 | 108779369 |
| chr6 | 108789111 | 108789297 |
| chr6 | 108805794 | 108806099 |
| chr6 | 108807273 | 108807629 |
| chr6 | 112555250 | 112555477 |
| chr6 | 113027218 | 113029331 |
| chr6 | 113054934 | 113055195 |
| chr6 | 113262167 | 113262327 |
| chr6 | 113271798 | 113272072 |
| chr6 | 113274322 | 113274612 |
| chr6 | 113294571 | 113294692 |
| chr6 | 113349476 | 113350264 |
| chr6 | 113433513 | 113434059 |

|      |           |           |
|------|-----------|-----------|
| chr6 | 113535405 | 113536284 |
| chr6 | 113554806 | 113555470 |
| chr6 | 113647752 | 113648105 |
| chr6 | 113668668 | 113669493 |
| chr6 | 114600840 | 114601156 |
| chr6 | 114688325 | 114688553 |
| chr6 | 114953060 | 114953155 |
| chr6 | 115499212 | 115500110 |
| chr6 | 115505983 | 115506754 |
| chr6 | 115632567 | 115632651 |
| chr6 | 116288066 | 116288313 |
| chr6 | 117856787 | 117858814 |
| chr6 | 117866555 | 117867695 |
| chr6 | 117900457 | 117900665 |
| chr6 | 119429532 | 119430338 |
| chr6 | 119798361 | 119798583 |
| chr6 | 119852740 | 119853059 |
| chr6 | 120314420 | 120314974 |
| chr6 | 120616665 | 120617427 |
| chr6 | 120700055 | 120700183 |
| chr6 | 120732165 | 120732437 |
| chr6 | 120786450 | 120786696 |
| chr6 | 121144084 | 121144433 |
| chr6 | 121596809 | 121597057 |
| chr6 | 121619969 | 121620069 |
| chr6 | 122258722 | 122259344 |
| chr6 | 122266351 | 122266706 |
| chr6 | 122266942 | 122267594 |
| chr6 | 122657504 | 122658158 |
| chr6 | 122663859 | 122664709 |
| chr6 | 122824838 | 122825091 |
| chr6 | 124426253 | 124426931 |
| chr6 | 124615332 | 124615910 |
| chr6 | 124664639 | 124665846 |
| chr6 | 124781912 | 124782440 |
| chr6 | 124816352 | 124816565 |
| chr6 | 124885168 | 124886056 |
| chr6 | 124915629 | 124915789 |
| chr6 | 124951966 | 124952491 |
| chr6 | 124959187 | 124959550 |
| chr6 | 124975806 | 124976157 |
| chr6 | 125046176 | 125046441 |
| chr6 | 125047019 | 125047313 |

|      |           |           |
|------|-----------|-----------|
| chr6 | 125071546 | 125072333 |
| chr6 | 125079740 | 125080627 |
| chr6 | 125102176 | 125102801 |
| chr6 | 125103074 | 125103560 |
| chr6 | 125171225 | 125172103 |
| chr6 | 125183774 | 125184321 |
| chr6 | 125311287 | 125311501 |
| chr6 | 125543575 | 125543714 |
| chr6 | 128312997 | 128313372 |
| chr6 | 128323226 | 128323997 |
| chr6 | 128400152 | 128400363 |
| chr6 | 128779079 | 128779169 |
| chr6 | 128788466 | 128788591 |
| chr6 | 128789064 | 128789213 |
| chr6 | 129483253 | 129483490 |
| chr6 | 132515033 | 132515128 |
| chr6 | 135033880 | 135034183 |
| chr6 | 135034227 | 135034687 |
| chr6 | 135331089 | 135331647 |
| chr6 | 136489968 | 136490458 |
| chr6 | 136535475 | 136536053 |
| chr6 | 136756834 | 136757207 |
| chr6 | 136757256 | 136757971 |
| chr6 | 137683661 | 137683961 |
| chr6 | 137691119 | 137691483 |
| chr6 | 137735029 | 137735269 |
| chr6 | 137746115 | 137746310 |
| chr6 | 140372407 | 140372676 |
| chr6 | 140392467 | 140393017 |
| chr6 | 140400742 | 140401725 |
| chr6 | 140410358 | 140410849 |
| chr6 | 140448771 | 140449298 |
| chr6 | 140571989 | 140573577 |
| chr6 | 142301389 | 142301488 |
| chr6 | 142335682 | 142336207 |
| chr6 | 143115753 | 143116531 |
| chr6 | 143139195 | 143140653 |
| chr6 | 143154227 | 143154996 |
| chr6 | 143155003 | 143156099 |
| chr6 | 146591165 | 146591629 |
| chr6 | 146851621 | 146851721 |
| chr6 | 146924583 | 146924778 |
| chr6 | 147010269 | 147010505 |

|      |           |           |
|------|-----------|-----------|
| chr6 | 147028746 | 147029135 |
| chr6 | 147040124 | 147040860 |
| chr6 | 148303185 | 148303570 |
| chr6 | 148303710 | 148304226 |
| chr6 | 149257953 | 149258185 |
| chr6 | 149259590 | 149260118 |
| chr6 | 149384912 | 149385163 |
| chr7 | 3217854   | 3219969   |
| chr7 | 3220060   | 3220908   |
| chr7 | 3297393   | 3298841   |
| chr7 | 3314196   | 3314330   |
| chr7 | 3318713   | 3318923   |
| chr7 | 3596880   | 3597760   |
| chr7 | 3597822   | 3598856   |
| chr7 | 3655909   | 3656678   |
| chr7 | 4083507   | 4083739   |
| chr7 | 4088870   | 4089385   |
| chr7 | 4096740   | 4099829   |
| chr7 | 4691741   | 4693618   |
| chr7 | 4697587   | 4698601   |
| chr7 | 4744575   | 4745348   |
| chr7 | 4828930   | 4829441   |
| chr7 | 4870821   | 4871744   |
| chr7 | 4877380   | 4877585   |
| chr7 | 4972174   | 4972781   |
| chr7 | 5013593   | 5014278   |
| chr7 | 5019694   | 5020387   |
| chr7 | 5044430   | 5045000   |
| chr7 | 5048172   | 5049064   |
| chr7 | 6124140   | 6124474   |
| chr7 | 6141414   | 6142098   |
| chr7 | 6937845   | 6938085   |
| chr7 | 7136373   | 7136598   |
| chr7 | 7230729   | 7231220   |
| chr7 | 13493079  | 13493502  |
| chr7 | 13508253  | 13508548  |
| chr7 | 13516143  | 13516248  |
| chr7 | 13563342  | 13563766  |
| chr7 | 13609534  | 13610633  |
| chr7 | 13612912  | 13616064  |
| chr7 | 13616093  | 13616440  |
| chr7 | 16280582  | 16280679  |
| chr7 | 16689567  | 16689942  |

|      |          |          |
|------|----------|----------|
| chr7 | 16715248 | 16715360 |
| chr7 | 16744598 | 16744758 |
| chr7 | 16895485 | 16895891 |
| chr7 | 16897057 | 16897457 |
| chr7 | 16902509 | 16903069 |
| chr7 | 16903304 | 16903577 |
| chr7 | 16985773 | 16987410 |
| chr7 | 16997695 | 16997996 |
| chr7 | 17046601 | 17046725 |
| chr7 | 17057161 | 17057300 |
| chr7 | 17356574 | 17356733 |
| chr7 | 17357453 | 17357543 |
| chr7 | 17366721 | 17367774 |
| chr7 | 17374244 | 17374355 |
| chr7 | 17383230 | 17383621 |
| chr7 | 17416446 | 17417409 |
| chr7 | 17460704 | 17460962 |
| chr7 | 19510808 | 19511066 |
| chr7 | 19589957 | 19590437 |
| chr7 | 19635884 | 19636293 |
| chr7 | 19636395 | 19637851 |
| chr7 | 19661603 | 19662420 |
| chr7 | 19677250 | 19677616 |
| chr7 | 19827477 | 19827567 |
| chr7 | 19846207 | 19846435 |
| chr7 | 19886586 | 19886733 |
| chr7 | 19932061 | 19932344 |
| chr7 | 20162942 | 20163242 |
| chr7 | 20408059 | 20408415 |
| chr7 | 20430008 | 20430719 |
| chr7 | 20559733 | 20560001 |
| chr7 | 24566397 | 24566494 |
| chr7 | 24872871 | 24873085 |
| chr7 | 25193445 | 25193856 |
| chr7 | 25267048 | 25267723 |
| chr7 | 25267891 | 25268292 |
| chr7 | 25288894 | 25289489 |
| chr7 | 25352327 | 25352801 |
| chr7 | 25669656 | 25670321 |
| chr7 | 25670805 | 25671643 |
| chr7 | 25692119 | 25692593 |
| chr7 | 25702974 | 25703451 |
| chr7 | 25703788 | 25704717 |



|      |          |          |
|------|----------|----------|
| chr7 | 25992672 | 25992758 |
| chr7 | 26063819 | 26064938 |
| chr7 | 26066821 | 26068003 |
| chr7 | 26072807 | 26074626 |
| chr7 | 26125723 | 26126229 |
| chr7 | 26149049 | 26149597 |
| chr7 | 26183343 | 26183622 |
| chr7 | 26246546 | 26246713 |
| chr7 | 26272965 | 26273341 |
| chr7 | 26452316 | 26453123 |
| chr7 | 28044410 | 28044871 |
| chr7 | 28338325 | 28338561 |
| chr7 | 28365721 | 28366597 |
| chr7 | 28376709 | 28377468 |
| chr7 | 28642309 | 28642439 |
| chr7 | 28954844 | 28955382 |
| chr7 | 28964882 | 28965540 |
| chr7 | 28971570 | 28972173 |
| chr7 | 28978925 | 28979986 |
| chr7 | 28981534 | 28982089 |
| chr7 | 29136429 | 29136707 |
| chr7 | 29158029 | 29158166 |
| chr7 | 29552169 | 29552515 |
| chr7 | 29595959 | 29596671 |
| chr7 | 29600119 | 29602350 |
| chr7 | 29602787 | 29603068 |
| chr7 | 30650484 | 30650715 |
| chr7 | 30812766 | 30813044 |
| chr7 | 30980008 | 30980247 |
| chr7 | 31102733 | 31103024 |
| chr7 | 31263900 | 31264200 |
| chr7 | 31535909 | 31536609 |
| chr7 | 32016877 | 32016970 |
| chr7 | 35068329 | 35068428 |
| chr7 | 35757156 | 35757457 |
| chr7 | 35779425 | 35779788 |
| chr7 | 36371394 | 36371618 |
| chr7 | 48863259 | 48863641 |
| chr7 | 50338206 | 50338449 |
| chr7 | 50341829 | 50341934 |
| chr7 | 50720712 | 50720835 |
| chr7 | 51503366 | 51503646 |
| chr7 | 51505218 | 51505365 |

|      |          |          |
|------|----------|----------|
| chr7 | 51505497 | 51506114 |
| chr7 | 51724548 | 51724983 |
| chr7 | 52071766 | 52072361 |
| chr7 | 52074097 | 52075640 |
| chr7 | 52082822 | 52085181 |
| chr7 | 52155649 | 52155785 |
| chr7 | 52255818 | 52256145 |
| chr7 | 52273350 | 52273469 |
| chr7 | 52276838 | 52277002 |
| chr7 | 52515383 | 52515723 |
| chr7 | 52814492 | 52814872 |
| chr7 | 52975162 | 52975512 |
| chr7 | 53049343 | 53049906 |
| chr7 | 53128196 | 53128441 |
| chr7 | 53138369 | 53138602 |
| chr7 | 53543248 | 53543681 |
| chr7 | 53705784 | 53705919 |
| chr7 | 54055042 | 54055202 |
| chr7 | 54110526 | 54110881 |
| chr7 | 54669239 | 54669336 |
| chr7 | 57054382 | 57054730 |
| chr7 | 57057335 | 57057428 |
| chr7 | 59243427 | 59243619 |
| chr7 | 60182463 | 60182572 |
| chr7 | 63075565 | 63075751 |
| chr7 | 63097927 | 63098084 |
| chr7 | 63152777 | 63152974 |
| chr7 | 63306036 | 63306263 |
| chr7 | 63319769 | 63319983 |
| chr7 | 63341014 | 63341121 |
| chr7 | 64900892 | 64901109 |
| chr7 | 65654677 | 65654807 |
| chr7 | 66484146 | 66485050 |
| chr7 | 66516811 | 66517058 |
| chr7 | 66523056 | 66523389 |
| chr7 | 69679474 | 69679579 |
| chr7 | 71463972 | 71464151 |
| chr7 | 71702403 | 71702587 |
| chr7 | 73007136 | 73007789 |
| chr7 | 73060608 | 73060832 |
| chr7 | 73254408 | 73255169 |
| chr7 | 73861619 | 73861848 |
| chr7 | 75096773 | 75097783 |

|      |          |          |
|------|----------|----------|
| chr7 | 75240881 | 75241210 |
| chr7 | 79798972 | 79799205 |
| chr7 | 80885636 | 80885862 |
| chr7 | 82600446 | 82600896 |
| chr7 | 86042252 | 86042973 |
| chr7 | 86043119 | 86043605 |
| chr7 | 86418148 | 86418347 |
| chr7 | 86430389 | 86430800 |
| chr7 | 86509470 | 86510182 |
| chr7 | 86577306 | 86577760 |
| chr7 | 86611304 | 86611434 |
| chr7 | 86805878 | 86806502 |
| chr7 | 86831563 | 86831669 |
| chr7 | 86957417 | 86957647 |
| chr7 | 87169738 | 87170419 |
| chr7 | 87170981 | 87171687 |
| chr7 | 87171860 | 87173643 |
| chr7 | 87179250 | 87181281 |
| chr7 | 87189092 | 87190112 |
| chr7 | 87214659 | 87215143 |
| chr7 | 87235697 | 87236250 |
| chr7 | 87424942 | 87425346 |
| chr7 | 88138722 | 88138888 |
| chr7 | 88224657 | 88225083 |
| chr7 | 88301660 | 88301878 |
| chr7 | 88380297 | 88380641 |
| chr7 | 88448844 | 88449642 |
| chr7 | 88669221 | 88669379 |
| chr7 | 88674647 | 88674972 |
| chr7 | 89319727 | 89320616 |
| chr7 | 89368696 | 89368988 |
| chr7 | 89412933 | 89413290 |
| chr7 | 89834940 | 89835066 |
| chr7 | 89843112 | 89843415 |
| chr7 | 89875634 | 89875767 |
| chr7 | 89892027 | 89892262 |
| chr7 | 89919526 | 89920600 |
| chr7 | 89964369 | 89964526 |
| chr7 | 90904545 | 90904819 |
| chr7 | 91040757 | 91040872 |
| chr7 | 94428730 | 94429040 |
| chr7 | 97278774 | 97279661 |
| chr7 | 97295585 | 97295922 |

|      |           |           |
|------|-----------|-----------|
| chr7 | 97590478  | 97590575  |
| chr7 | 97591302  | 97591644  |
| chr7 | 97591820  | 97592449  |
| chr7 | 99891786  | 99892315  |
| chr7 | 100023813 | 100024224 |
| chr7 | 103359150 | 103359441 |
| chr7 | 103361198 | 103362076 |
| chr7 | 103403330 | 103403684 |
| chr7 | 104110249 | 104110505 |
| chr7 | 104728413 | 104729322 |
| chr7 | 104740401 | 104740902 |
| chr7 | 104796177 | 104796495 |
| chr7 | 104937552 | 104937691 |
| chr7 | 104951571 | 104951788 |
| chr7 | 104973737 | 104973839 |
| chr7 | 105241577 | 105241695 |
| chr7 | 105963920 | 105964049 |
| chr7 | 106591461 | 106591590 |
| chr7 | 106646237 | 106646374 |
| chr7 | 107756393 | 107756910 |
| chr7 | 107756933 | 107757414 |
| chr7 | 107961682 | 107962052 |
| chr7 | 107967066 | 107967164 |
| chr7 | 107984675 | 107984971 |
| chr7 | 108147712 | 108147803 |
| chr7 | 108257028 | 108257261 |
| chr7 | 108875365 | 108875987 |
| chr7 | 108889710 | 108890076 |
| chr7 | 109055126 | 109055427 |
| chr7 | 109085927 | 109086566 |
| chr7 | 109118224 | 109118989 |
| chr7 | 109159295 | 109159640 |
| chr7 | 109225753 | 109226050 |
| chr7 | 109416282 | 109416831 |
| chr7 | 109509635 | 109510105 |
| chr7 | 109577560 | 109577789 |
| chr7 | 109620815 | 109621114 |
| chr7 | 110420077 | 110420350 |
| chr7 | 111571786 | 111571924 |
| chr7 | 114353056 | 114353828 |
| chr7 | 114387684 | 114387931 |
| chr7 | 114392138 | 114392666 |
| chr7 | 114416174 | 114416280 |

|      |           |           |
|------|-----------|-----------|
| chr7 | 114514368 | 114515434 |
| chr7 | 114603434 | 114603778 |
| chr7 | 114656811 | 114656956 |
| chr7 | 114835568 | 114835978 |
| chr7 | 116077906 | 116078293 |
| chr7 | 116662713 | 116663163 |
| chr7 | 116663312 | 116663950 |
| chr7 | 116664731 | 116665116 |
| chr7 | 117161834 | 117162814 |
| chr7 | 117166602 | 117166906 |
| chr7 | 117173247 | 117173421 |
| chr7 | 117189734 | 117190214 |
| chr7 | 117199198 | 117199415 |
| chr7 | 117265530 | 117265964 |
| chr7 | 117265988 | 117266388 |
| chr7 | 118174879 | 118175077 |
| chr7 | 119167156 | 119167418 |
| chr7 | 119822871 | 119823971 |
| chr7 | 119828613 | 119829363 |
| chr7 | 119834927 | 119837036 |
| chr7 | 119854284 | 119856490 |
| chr7 | 119903874 | 119905101 |
| chr7 | 119923106 | 119924614 |
| chr7 | 119934302 | 119934519 |
| chr7 | 119998816 | 119999389 |
| chr7 | 120011659 | 120012411 |
| chr7 | 120020306 | 120021063 |
| chr7 | 120046186 | 120046850 |
| chr7 | 120194723 | 120195149 |
| chr7 | 120196501 | 120196744 |
| chr7 | 121558886 | 121559201 |
| chr7 | 121559432 | 121559702 |
| chr7 | 123595927 | 123596016 |
| chr7 | 124525476 | 124525806 |
| chr7 | 124545510 | 124545709 |
| chr7 | 125887146 | 125887366 |
| chr7 | 125905000 | 125905491 |
| chr7 | 125929233 | 125929534 |
| chr7 | 126026674 | 126026827 |
| chr7 | 126978630 | 126978905 |
| chr7 | 127584744 | 127585117 |
| chr7 | 127595070 | 127595417 |
| chr7 | 127602281 | 127602467 |

|      |           |           |
|------|-----------|-----------|
| chr7 | 127821103 | 127821513 |
| chr7 | 127836002 | 127836164 |
| chr7 | 128061025 | 128061158 |
| chr7 | 129222720 | 129223779 |
| chr7 | 129472160 | 129472591 |
| chr7 | 130113457 | 130114421 |
| chr7 | 130125882 | 130126099 |
| chr7 | 130140467 | 130140840 |
| chr7 | 130267665 | 130268108 |
| chr7 | 130294965 | 130295053 |
| chr7 | 130514338 | 130514714 |
| chr7 | 130996516 | 130997234 |
| chr7 | 131126502 | 131127029 |
| chr7 | 131142994 | 131143281 |
| chr7 | 131204814 | 131204970 |
| chr7 | 132219772 | 132219904 |
| chr7 | 132888433 | 132888676 |
| chr7 | 133416097 | 133417030 |
| chr7 | 133632197 | 133632374 |
| chr7 | 133646153 | 133646471 |
| chr7 | 133646534 | 133647181 |
| chr7 | 133967448 | 133967697 |
| chr7 | 134088331 | 134088886 |
| chr7 | 134223015 | 134223129 |
| chr7 | 134342143 | 134342446 |
| chr7 | 134379804 | 134380475 |
| chr7 | 134615558 | 134615867 |
| chr7 | 134628059 | 134628430 |
| chr7 | 134655575 | 134656352 |
| chr7 | 134663088 | 134663384 |
| chr7 | 134671385 | 134671565 |
| chr7 | 134685113 | 134685880 |
| chr7 | 134701771 | 134702929 |
| chr7 | 134721126 | 134721560 |
| chr7 | 134890015 | 134891026 |
| chr7 | 134911262 | 134912566 |
| chr7 | 134920545 | 134921504 |
| chr7 | 134928355 | 134930245 |
| chr7 | 134946288 | 134946571 |
| chr7 | 135051950 | 135052193 |
| chr7 | 135056823 | 135057032 |
| chr7 | 135111003 | 135112166 |
| chr7 | 135116084 | 135116412 |

|      |           |           |
|------|-----------|-----------|
| chr7 | 135125267 | 135125604 |
| chr7 | 135150456 | 135150630 |
| chr7 | 135927384 | 135927531 |
| chr7 | 137789519 | 137790027 |
| chr7 | 137801332 | 137801743 |
| chr7 | 137878689 | 137879218 |
| chr7 | 137897703 | 137897897 |
| chr7 | 138036088 | 138036470 |
| chr7 | 138036484 | 138036713 |
| chr7 | 138038922 | 138039900 |
| chr7 | 138054480 | 138054786 |
| chr7 | 139847229 | 139847605 |
| chr7 | 140122907 | 140123723 |
| chr7 | 141862563 | 141863007 |
| chr7 | 141874531 | 141874967 |
| chr7 | 142081667 | 142082523 |
| chr7 | 142110135 | 142110498 |
| chr7 | 142280803 | 142280926 |
| chr7 | 144086322 | 144087065 |
| chr7 | 144091853 | 144092360 |
| chr7 | 144126053 | 144127078 |
| chr7 | 144177123 | 144177258 |
| chr7 | 144201307 | 144201851 |
| chr7 | 144251822 | 144252147 |
| chr7 | 144629352 | 144630171 |
| chr7 | 144647578 | 144648143 |
| chr7 | 146038300 | 146038881 |
| chr7 | 146063824 | 146064180 |
| chr7 | 146073534 | 146073766 |
| chr7 | 146648458 | 146648955 |
| chr7 | 147107109 | 147107306 |
| chr7 | 147129801 | 147130725 |
| chr7 | 147130738 | 147131015 |
| chr7 | 148043289 | 148043803 |
| chr7 | 148127656 | 148127957 |
| chr7 | 148141830 | 148142004 |
| chr7 | 148246884 | 148247341 |
| chr7 | 148253775 | 148254539 |
| chr7 | 148322016 | 148322316 |
| chr7 | 148340663 | 148341574 |
| chr7 | 148633547 | 148633883 |
| chr7 | 148634553 | 148635031 |
| chr7 | 148656390 | 148656813 |

|      |           |           |
|------|-----------|-----------|
| chr7 | 148750283 | 148750610 |
| chr7 | 148800822 | 148801654 |
| chr7 | 148818405 | 148819003 |
| chr7 | 149719214 | 149719600 |
| chr7 | 150238659 | 150241387 |
| chr7 | 150253220 | 150253839 |
| chr7 | 150324903 | 150325071 |
| chr7 | 150339939 | 150340227 |
| chr7 | 150669999 | 150670105 |
| chr7 | 151033736 | 151034305 |
| chr7 | 152047315 | 152050245 |
| chr7 | 152050333 | 152051258 |
| chr7 | 152173230 | 152173627 |
| chr8 | 3513618   | 3514839   |
| chr8 | 3531714   | 3532072   |
| chr8 | 3537425   | 3538067   |
| chr8 | 3540922   | 3541533   |
| chr8 | 3543945   | 3544211   |
| chr8 | 3604348   | 3605086   |
| chr8 | 4239019   | 4240146   |
| chr8 | 4245826   | 4246680   |
| chr8 | 4328643   | 4329462   |
| chr8 | 4512128   | 4512331   |
| chr8 | 5640030   | 5640315   |
| chr8 | 11346347  | 11346574  |
| chr8 | 11392022  | 11392555  |
| chr8 | 11448246  | 11448912  |
| chr8 | 11449065  | 11449289  |
| chr8 | 11497609  | 11497943  |
| chr8 | 11510784  | 11510882  |
| chr8 | 11511514  | 11511806  |
| chr8 | 11556479  | 11557025  |
| chr8 | 11728442  | 11728732  |
| chr8 | 11758420  | 11759023  |
| chr8 | 11817536  | 11817913  |
| chr8 | 11833828  | 11834636  |
| chr8 | 12666688  | 12666805  |
| chr8 | 12757257  | 12757667  |
| chr8 | 12782859  | 12783307  |
| chr8 | 13131305  | 13131498  |
| chr8 | 13159172  | 13159469  |
| chr8 | 13171016  | 13171520  |
| chr8 | 13174406  | 13174789  |



|      |          |          |
|------|----------|----------|
| chr8 | 13174869 | 13175373 |
| chr8 | 13202265 | 13202482 |
| chr8 | 13338807 | 13339390 |
| chr8 | 13354441 | 13356833 |
| chr8 | 13757698 | 13758174 |
| chr8 | 13837809 | 13837937 |
| chr8 | 13876041 | 13876277 |
| chr8 | 14388467 | 14388591 |
| chr8 | 15027907 | 15028339 |
| chr8 | 18138285 | 18138393 |
| chr8 | 18696752 | 18697674 |
| chr8 | 18735903 | 18736166 |
| chr8 | 18846360 | 18846730 |
| chr8 | 18846773 | 18847123 |
| chr8 | 19698586 | 19699089 |
| chr8 | 19784769 | 19785045 |
| chr8 | 19785128 | 19785388 |
| chr8 | 19801263 | 19801404 |
| chr8 | 23587295 | 23587748 |
| chr8 | 23658438 | 23658781 |
| chr8 | 23969980 | 23970209 |
| chr8 | 23975464 | 23975661 |
| chr8 | 24521867 | 24522495 |
| chr8 | 24522566 | 24523074 |
| chr8 | 26629274 | 26629923 |
| chr8 | 26684311 | 26685149 |
| chr8 | 26712721 | 26713310 |
| chr8 | 26794930 | 26795836 |
| chr8 | 27243778 | 27244005 |
| chr8 | 28148145 | 28148730 |
| chr8 | 28221553 | 28221735 |
| chr8 | 28370706 | 28371427 |
| chr8 | 28371444 | 28372305 |
| chr8 | 32261191 | 32261427 |
| chr8 | 34710123 | 34710376 |
| chr8 | 34764003 | 34764271 |
| chr8 | 35217696 | 35217909 |
| chr8 | 39276254 | 39276387 |
| chr8 | 40068965 | 40069259 |
| chr8 | 40775925 | 40776011 |
| chr8 | 41420538 | 41420679 |
| chr8 | 41597199 | 41597416 |
| chr8 | 41633361 | 41633479 |

|      |          |          |
|------|----------|----------|
| chr8 | 42325249 | 42325648 |
| chr8 | 42326000 | 42326484 |
| chr8 | 42472010 | 42472157 |
| chr8 | 44269852 | 44270845 |
| chr8 | 44274956 | 44275512 |
| chr8 | 44439491 | 44439987 |
| chr8 | 46020628 | 46021055 |
| chr8 | 46023454 | 46023952 |
| chr8 | 46036837 | 46037636 |
| chr8 | 46049464 | 46049626 |
| chr8 | 46137124 | 46137457 |
| chr8 | 46272671 | 46272963 |
| chr8 | 48760796 | 48760993 |
| chr8 | 55162387 | 55163158 |
| chr8 | 59990767 | 59991432 |
| chr8 | 59991607 | 59991773 |
| chr8 | 63384892 | 63385041 |
| chr8 | 70021618 | 70021763 |
| chr8 | 71612847 | 71613066 |
| chr8 | 71801198 | 71801384 |
| chr8 | 71812858 | 71812963 |
| chr8 | 72582877 | 72583314 |
| chr8 | 72608006 | 72608199 |
| chr8 | 72705846 | 72706209 |
| chr8 | 73058685 | 73059234 |
| chr8 | 73222847 | 73223190 |
| chr8 | 73223243 | 73223649 |
| chr8 | 73224530 | 73224790 |
| chr8 | 73430022 | 73430625 |
| chr8 | 73861069 | 73861270 |
| chr8 | 73861338 | 73861562 |
| chr8 | 73883230 | 73883571 |
| chr8 | 73931142 | 73931887 |
| chr8 | 73943908 | 73944460 |
| chr8 | 74022796 | 74023092 |
| chr8 | 74103302 | 74103870 |
| chr8 | 74135096 | 74135493 |
| chr8 | 74148366 | 74149011 |
| chr8 | 74203286 | 74204088 |
| chr8 | 74212107 | 74212775 |
| chr8 | 74212865 | 74213550 |
| chr8 | 74281261 | 74281536 |
| chr8 | 74446720 | 74447017 |

|      |          |          |
|------|----------|----------|
| chr8 | 74561554 | 74561646 |
| chr8 | 74842971 | 74844261 |
| chr8 | 74950693 | 74950905 |
| chr8 | 75250896 | 75251112 |
| chr8 | 77517889 | 77518292 |
| chr8 | 77633463 | 77633853 |
| chr8 | 77640358 | 77641153 |
| chr8 | 77651206 | 77651631 |
| chr8 | 80626977 | 80627362 |
| chr8 | 81107883 | 81108244 |
| chr8 | 81135377 | 81135575 |
| chr8 | 81136151 | 81136252 |
| chr8 | 81182032 | 81182248 |
| chr8 | 81552538 | 81552984 |
| chr8 | 81553077 | 81553536 |
| chr8 | 81818954 | 81819241 |
| chr8 | 82163302 | 82163900 |
| chr8 | 82200427 | 82201093 |
| chr8 | 86181543 | 86181806 |
| chr8 | 86239489 | 86240091 |
| chr8 | 86423788 | 86425531 |
| chr8 | 86450186 | 86453448 |
| chr8 | 86462154 | 86464876 |
| chr8 | 86521719 | 86522213 |
| chr8 | 86939848 | 86940113 |
| chr8 | 86949945 | 86950810 |
| chr8 | 86959684 | 86960181 |
| chr8 | 86967356 | 86968385 |
| chr8 | 86974305 | 86974732 |
| chr8 | 87010950 | 87011316 |
| chr8 | 87095739 | 87096402 |
| chr8 | 87162832 | 87163128 |
| chr8 | 87214394 | 87214768 |
| chr8 | 87406330 | 87406521 |
| chr8 | 87493596 | 87493706 |
| chr8 | 87522155 | 87522530 |
| chr8 | 87551114 | 87551438 |
| chr8 | 87554090 | 87554325 |
| chr8 | 87560788 | 87561533 |
| chr8 | 87561570 | 87562554 |
| chr8 | 87573771 | 87574548 |
| chr8 | 87577300 | 87577941 |
| chr8 | 88364897 | 88365246 |

|      |           |           |
|------|-----------|-----------|
| chr8 | 88386790  | 88386990  |
| chr8 | 88450888  | 88451143  |
| chr8 | 88461358  | 88462014  |
| chr8 | 89440713  | 89440906  |
| chr8 | 89996880  | 89997437  |
| chr8 | 90012716  | 90013154  |
| chr8 | 90723440  | 90724956  |
| chr8 | 91261484  | 91261700  |
| chr8 | 91567121  | 91567553  |
| chr8 | 91567841  | 91568278  |
| chr8 | 92860368  | 92860455  |
| chr8 | 93432650  | 93433400  |
| chr8 | 93468938  | 93469115  |
| chr8 | 93619071  | 93619248  |
| chr8 | 93634169  | 93634294  |
| chr8 | 93981211  | 93981326  |
| chr8 | 94081710  | 94082574  |
| chr8 | 94106335  | 94107000  |
| chr8 | 94123785  | 94124203  |
| chr8 | 95351259  | 95351712  |
| chr8 | 95376995  | 95377279  |
| chr8 | 96334634  | 96334875  |
| chr8 | 96697016  | 96697500  |
| chr8 | 96703998  | 96704267  |
| chr8 | 96796093  | 96796364  |
| chr8 | 96837063  | 96837400  |
| chr8 | 97126130  | 97126429  |
| chr8 | 97138274  | 97138385  |
| chr8 | 97139706  | 97139855  |
| chr8 | 97227523  | 97227661  |
| chr8 | 97392931  | 97393206  |
| chr8 | 98239817  | 98240693  |
| chr8 | 101596362 | 101596516 |
| chr8 | 107696390 | 107696536 |
| chr8 | 107749262 | 107749632 |
| chr8 | 107749676 | 107750150 |
| chr8 | 107822135 | 107822624 |
| chr8 | 107880439 | 107880898 |
| chr8 | 107883049 | 107883280 |
| chr8 | 108129132 | 108129686 |
| chr8 | 108137831 | 108138376 |
| chr8 | 108160484 | 108161518 |
| chr8 | 108384547 | 108385421 |

|      |           |           |
|------|-----------|-----------|
| chr8 | 108535802 | 108536034 |
| chr8 | 108583497 | 108583665 |
| chr8 | 108687501 | 108687893 |
| chr8 | 108707843 | 108708118 |
| chr8 | 108741295 | 108741592 |
| chr8 | 109192614 | 109193424 |
| chr8 | 109193429 | 109194142 |
| chr8 | 109239046 | 109239309 |
| chr8 | 109356079 | 109356338 |
| chr8 | 109459657 | 109460559 |
| chr8 | 109535668 | 109535973 |
| chr8 | 109686299 | 109686696 |
| chr8 | 109824599 | 109824716 |
| chr8 | 109840297 | 109840410 |
| chr8 | 109896145 | 109896529 |
| chr8 | 109898395 | 109898893 |
| chr8 | 109902556 | 109903034 |
| chr8 | 111227643 | 111229135 |
| chr8 | 111238583 | 111239843 |
| chr8 | 111318549 | 111318892 |
| chr8 | 111353601 | 111353724 |
| chr8 | 111461899 | 111462076 |
| chr8 | 111663572 | 111663801 |
| chr8 | 111666949 | 111667091 |
| chr8 | 112302622 | 112303664 |
| chr8 | 112340055 | 112340264 |
| chr8 | 112347034 | 112347243 |
| chr8 | 112363067 | 112363377 |
| chr8 | 112384187 | 112384699 |
| chr8 | 112392478 | 112393214 |
| chr8 | 112465653 | 112465978 |
| chr8 | 113163256 | 113163619 |
| chr8 | 113206457 | 113207042 |
| chr8 | 113444382 | 113444580 |
| chr8 | 113447023 | 113447206 |
| chr8 | 113557745 | 113558210 |
| chr8 | 113579128 | 113579490 |
| chr8 | 113586456 | 113586584 |
| chr8 | 113653645 | 113653836 |
| chr8 | 114060649 | 114061863 |
| chr8 | 114484870 | 114485192 |
| chr8 | 114536437 | 114536647 |
| chr8 | 115228062 | 115228389 |

|      |           |           |
|------|-----------|-----------|
| chr8 | 117045689 | 117046042 |
| chr8 | 117244784 | 117244957 |
| chr8 | 117270981 | 117271425 |
| chr8 | 117338389 | 117338945 |
| chr8 | 117388284 | 117388440 |
| chr8 | 117428934 | 117429350 |
| chr8 | 117517549 | 117517657 |
| chr8 | 119652326 | 119652413 |
| chr8 | 119682146 | 119682463 |
| chr8 | 119717304 | 119717575 |
| chr8 | 119780576 | 119781634 |
| chr8 | 119781683 | 119784151 |
| chr8 | 119810901 | 119812727 |
| chr8 | 119854384 | 119854949 |
| chr8 | 119856136 | 119856604 |
| chr8 | 119880199 | 119880788 |
| chr8 | 119911104 | 119912184 |
| chr8 | 119984294 | 119984709 |
| chr8 | 121371109 | 121371204 |
| chr8 | 122807231 | 122807678 |
| chr8 | 123059552 | 123060781 |
| chr8 | 123061036 | 123062883 |
| chr8 | 123192149 | 123192675 |
| chr8 | 123193209 | 123193336 |
| chr8 | 124474503 | 124475525 |
| chr8 | 124833888 | 124834251 |
| chr8 | 124920041 | 124920273 |
| chr8 | 125566792 | 125566908 |
| chr8 | 125626250 | 125627148 |
| chr8 | 125748843 | 125749193 |
| chr8 | 125899474 | 125899964 |
| chr8 | 125924825 | 125925840 |
| chr8 | 125926142 | 125926635 |
| chr8 | 126026865 | 126027644 |
| chr8 | 126554492 | 126555096 |
| chr8 | 126755252 | 126756534 |
| chr8 | 126756873 | 126757201 |
| chr8 | 126867479 | 126868229 |
| chr8 | 127256055 | 127256998 |
| chr8 | 127696823 | 127697172 |
| chr8 | 128522832 | 128523002 |
| chr8 | 129652693 | 129653086 |
| chr8 | 129800310 | 129800433 |

|      |           |           |
|------|-----------|-----------|
| chr8 | 130003399 | 130003537 |
| chr8 | 130138610 | 130138759 |
| chr8 | 131174942 | 131175029 |
| chr8 | 131209653 | 131210304 |
| chr8 | 131246807 | 131246975 |
| chr8 | 131256620 | 131257105 |
| chr9 | 3417152   | 3417417   |
| chr9 | 4259930   | 4260176   |
| chr9 | 4260537   | 4260826   |
| chr9 | 7212933   | 7213179   |
| chr9 | 13553844  | 13554103  |
| chr9 | 13577759  | 13577954  |
| chr9 | 14576692  | 14576778  |
| chr9 | 14610374  | 14610515  |
| chr9 | 14614518  | 14615077  |
| chr9 | 15110742  | 15111050  |
| chr9 | 15118162  | 15118958  |
| chr9 | 15119189  | 15120397  |
| chr9 | 15120821  | 15121336  |
| chr9 | 15535434  | 15535699  |
| chr9 | 17331201  | 17331330  |
| chr9 | 18103250  | 18103815  |
| chr9 | 20451077  | 20451201  |
| chr9 | 20456610  | 20457403  |
| chr9 | 20693765  | 20694532  |
| chr9 | 20695024  | 20696004  |
| chr9 | 21158017  | 21158476  |
| chr9 | 21172318  | 21173068  |
| chr9 | 21173870  | 21174124  |
| chr9 | 21206565  | 21207702  |
| chr9 | 21238173  | 21238700  |
| chr9 | 21283405  | 21284162  |
| chr9 | 21285494  | 21285896  |
| chr9 | 21296545  | 21297282  |
| chr9 | 21297698  | 21299017  |
| chr9 | 21309674  | 21310289  |
| chr9 | 21392028  | 21393526  |
| chr9 | 21420617  | 21421206  |
| chr9 | 21484750  | 21485275  |
| chr9 | 21552595  | 21552980  |
| chr9 | 21815226  | 21815575  |
| chr9 | 21818368  | 21818705  |
| chr9 | 21875573  | 21875907  |

|      |          |          |
|------|----------|----------|
| chr9 | 22218799 | 22219352 |
| chr9 | 22552622 | 22552919 |
| chr9 | 25060195 | 25060982 |
| chr9 | 25066539 | 25066697 |
| chr9 | 27117884 | 27118175 |
| chr9 | 27141754 | 27142451 |
| chr9 | 27154382 | 27155762 |
| chr9 | 28827846 | 28827963 |
| chr9 | 30234669 | 30235226 |
| chr9 | 30837976 | 30838732 |
| chr9 | 30857654 | 30857858 |
| chr9 | 31088594 | 31088876 |
| chr9 | 31839883 | 31840741 |
| chr9 | 31871149 | 31871254 |
| chr9 | 31981811 | 31982199 |
| chr9 | 32003750 | 32004055 |
| chr9 | 32043987 | 32044074 |
| chr9 | 35112809 | 35113145 |
| chr9 | 35229007 | 35229599 |
| chr9 | 37296701 | 37298274 |
| chr9 | 37307510 | 37308637 |
| chr9 | 37321285 | 37322400 |
| chr9 | 37324107 | 37324499 |
| chr9 | 38202082 | 38202325 |
| chr9 | 40611594 | 40611807 |
| chr9 | 40611911 | 40612384 |
| chr9 | 40612759 | 40613046 |
| chr9 | 43552064 | 43553113 |
| chr9 | 43553166 | 43553857 |
| chr9 | 43611947 | 43614489 |
| chr9 | 43893081 | 43893468 |
| chr9 | 44142770 | 44144286 |
| chr9 | 44187655 | 44187942 |
| chr9 | 44199129 | 44200387 |
| chr9 | 44215782 | 44216133 |
| chr9 | 44233111 | 44233465 |
| chr9 | 44305940 | 44306050 |
| chr9 | 44412905 | 44413596 |
| chr9 | 44416617 | 44416708 |
| chr9 | 45178989 | 45180214 |
| chr9 | 45186768 | 45187462 |
| chr9 | 45203033 | 45204067 |
| chr9 | 45326921 | 45327171 |



|      |          |          |
|------|----------|----------|
| chr9 | 45335406 | 45335505 |
| chr9 | 45396077 | 45396316 |
| chr9 | 45669807 | 45669985 |
| chr9 | 45947950 | 45948062 |
| chr9 | 45948392 | 45948621 |
| chr9 | 47338469 | 47340374 |
| chr9 | 47346484 | 47347030 |
| chr9 | 47347822 | 47347935 |
| chr9 | 47481469 | 47482208 |
| chr9 | 47509591 | 47510630 |
| chr9 | 47517305 | 47517517 |
| chr9 | 47542171 | 47542508 |
| chr9 | 47559095 | 47559557 |
| chr9 | 47640870 | 47641091 |
| chr9 | 47995902 | 47996172 |
| chr9 | 48009904 | 48010025 |
| chr9 | 48830152 | 48830451 |
| chr9 | 48869296 | 48869411 |
| chr9 | 51856377 | 51856932 |
| chr9 | 53345255 | 53345848 |
| chr9 | 54651102 | 54652220 |
| chr9 | 54711569 | 54711874 |
| chr9 | 54748719 | 54748907 |
| chr9 | 54757622 | 54758024 |
| chr9 | 54758092 | 54758195 |
| chr9 | 54765298 | 54765526 |
| chr9 | 54798605 | 54799216 |
| chr9 | 54997208 | 54998475 |
| chr9 | 55000581 | 55001074 |
| chr9 | 55889688 | 55889934 |
| chr9 | 56920743 | 56921411 |
| chr9 | 56924104 | 56925422 |
| chr9 | 56943221 | 56943405 |
| chr9 | 56986999 | 56987721 |
| chr9 | 57369099 | 57369488 |
| chr9 | 57556464 | 57556575 |
| chr9 | 57596252 | 57596697 |
| chr9 | 57787941 | 57788061 |
| chr9 | 57809496 | 57809784 |
| chr9 | 58101076 | 58101520 |
| chr9 | 58112592 | 58112770 |
| chr9 | 58197374 | 58197586 |
| chr9 | 58430097 | 58430748 |

|      |          |          |
|------|----------|----------|
| chr9 | 58461474 | 58462050 |
| chr9 | 58494022 | 58494407 |
| chr9 | 59139365 | 59139822 |
| chr9 | 59140638 | 59141027 |
| chr9 | 59147011 | 59147378 |
| chr9 | 59160658 | 59161578 |
| chr9 | 59387724 | 59388010 |
| chr9 | 59465231 | 59465414 |
| chr9 | 59504352 | 59506757 |
| chr9 | 59521266 | 59522113 |
| chr9 | 59522382 | 59524948 |
| chr9 | 59574969 | 59575172 |
| chr9 | 59598802 | 59599111 |
| chr9 | 60721315 | 60721401 |
| chr9 | 61220519 | 61221311 |
| chr9 | 61247968 | 61248452 |
| chr9 | 62189430 | 62190991 |
| chr9 | 62191003 | 62191663 |
| chr9 | 62981088 | 62981221 |
| chr9 | 63450543 | 63450747 |
| chr9 | 64022591 | 64023100 |
| chr9 | 64023219 | 64023659 |
| chr9 | 64023676 | 64023800 |
| chr9 | 64024383 | 64025101 |
| chr9 | 64129414 | 64129789 |
| chr9 | 64143719 | 64144011 |
| chr9 | 64234071 | 64234378 |
| chr9 | 64234513 | 64235007 |
| chr9 | 64422994 | 64423405 |
| chr9 | 64437128 | 64437263 |
| chr9 | 64585861 | 64585967 |
| chr9 | 64880290 | 64880944 |
| chr9 | 64881776 | 64882120 |
| chr9 | 64983831 | 64984014 |
| chr9 | 65174894 | 65175069 |
| chr9 | 65193933 | 65194385 |
| chr9 | 65194589 | 65194791 |
| chr9 | 65288853 | 65288954 |
| chr9 | 65478175 | 65479359 |
| chr9 | 65507564 | 65508023 |
| chr9 | 65748049 | 65748143 |
| chr9 | 65756800 | 65757634 |
| chr9 | 65777507 | 65777610 |

|      |          |          |
|------|----------|----------|
| chr9 | 65861922 | 65862122 |
| chr9 | 65890105 | 65890344 |
| chr9 | 65907916 | 65908219 |
| chr9 | 65914167 | 65914693 |
| chr9 | 66348538 | 66348767 |
| chr9 | 66601072 | 66601278 |
| chr9 | 66793907 | 66794067 |
| chr9 | 68566078 | 68566210 |
| chr9 | 68601066 | 68601344 |
| chr9 | 68918761 | 68918934 |
| chr9 | 69339274 | 69339529 |
| chr9 | 69860366 | 69860549 |
| chr9 | 69862335 | 69862592 |
| chr9 | 70055526 | 70056403 |
| chr9 | 70066817 | 70067072 |
| chr9 | 70077698 | 70078052 |
| chr9 | 70192773 | 70193272 |
| chr9 | 70210060 | 70210397 |
| chr9 | 70247462 | 70247581 |
| chr9 | 70400929 | 70401182 |
| chr9 | 70402461 | 70402579 |
| chr9 | 70526800 | 70527380 |
| chr9 | 72122701 | 72123486 |
| chr9 | 72379907 | 72381074 |
| chr9 | 72413128 | 72413344 |
| chr9 | 72413729 | 72414047 |
| chr9 | 72466037 | 72466512 |
| chr9 | 72479989 | 72480075 |
| chr9 | 72481252 | 72481387 |
| chr9 | 72510181 | 72511407 |
| chr9 | 72531867 | 72532359 |
| chr9 | 72554816 | 72555160 |
| chr9 | 72563986 | 72564466 |
| chr9 | 72573081 | 72574411 |
| chr9 | 72594854 | 72595928 |
| chr9 | 72596533 | 72597536 |
| chr9 | 74885525 | 74885748 |
| chr9 | 74940452 | 74940635 |
| chr9 | 75068064 | 75068530 |
| chr9 | 75132389 | 75132725 |
| chr9 | 75186167 | 75186384 |
| chr9 | 77602536 | 77603077 |
| chr9 | 77765228 | 77765795 |

|      |           |           |
|------|-----------|-----------|
| chr9 | 77786989  | 77787432  |
| chr9 | 77811478  | 77812133  |
| chr9 | 77818321  | 77818619  |
| chr9 | 77824160  | 77824261  |
| chr9 | 77830520  | 77830943  |
| chr9 | 78371220  | 78371401  |
| chr9 | 79914919  | 79915744  |
| chr9 | 79956016  | 79956112  |
| chr9 | 83740934  | 83741508  |
| chr9 | 83823307  | 83823667  |
| chr9 | 85935038  | 85935123  |
| chr9 | 86916924  | 86917168  |
| chr9 | 88448071  | 88448228  |
| chr9 | 88970166  | 88970273  |
| chr9 | 90246831  | 90246997  |
| chr9 | 92437026  | 92437447  |
| chr9 | 94179332  | 94179415  |
| chr9 | 95772493  | 95772653  |
| chr9 | 96023544  | 96023666  |
| chr9 | 96060516  | 96060799  |
| chr9 | 96097132  | 96097435  |
| chr9 | 96105811  | 96106073  |
| chr9 | 96142728  | 96143224  |
| chr9 | 98464173  | 98464352  |
| chr9 | 98886894  | 98887273  |
| chr9 | 99179459  | 99179584  |
| chr9 | 100498812 | 100499010 |
| chr9 | 100509392 | 100509634 |
| chr9 | 100543708 | 100545173 |
| chr9 | 100604077 | 100604249 |
| chr9 | 100647785 | 100648107 |
| chr9 | 100704737 | 100704927 |
| chr9 | 100731475 | 100731718 |
| chr9 | 100847074 | 100847212 |
| chr9 | 100999800 | 101000287 |
| chr9 | 102030247 | 102030374 |
| chr9 | 102634720 | 102635068 |
| chr9 | 102737395 | 102737752 |
| chr9 | 102737805 | 102738145 |
| chr9 | 102767264 | 102767716 |
| chr9 | 102780561 | 102780850 |
| chr9 | 103014735 | 103015086 |
| chr9 | 103061835 | 103062119 |

|      |           |           |
|------|-----------|-----------|
| chr9 | 103207573 | 103207860 |
| chr9 | 103228536 | 103229464 |
| chr9 | 103229945 | 103230559 |
| chr9 | 103240388 | 103240861 |
| chr9 | 103345144 | 103345786 |
| chr9 | 106073312 | 106073638 |
| chr9 | 106091300 | 106091759 |
| chr9 | 106331959 | 106332105 |
| chr9 | 106724345 | 106725003 |
| chr9 | 107905021 | 107905204 |
| chr9 | 107947780 | 107948399 |
| chr9 | 107948524 | 107949680 |
| chr9 | 108208578 | 108209308 |
| chr9 | 108419602 | 108420421 |
| chr9 | 108435938 | 108436503 |
| chr9 | 108466038 | 108466960 |
| chr9 | 108474108 | 108474644 |
| chr9 | 108564595 | 108564871 |
| chr9 | 108699509 | 108700112 |
| chr9 | 108756672 | 108756854 |
| chr9 | 108941111 | 108941391 |
| chr9 | 108959771 | 108960134 |
| chr9 | 108998386 | 108998571 |
| chr9 | 109778151 | 109778743 |
| chr9 | 109802304 | 109802650 |
| chr9 | 109834200 | 109835764 |
| chr9 | 109849497 | 109849719 |
| chr9 | 109855077 | 109855247 |
| chr9 | 109902707 | 109902880 |
| chr9 | 109905229 | 109905490 |
| chr9 | 109922904 | 109923352 |
| chr9 | 109984235 | 109985629 |
| chr9 | 110097706 | 110097857 |
| chr9 | 110140212 | 110140816 |
| chr9 | 110208567 | 110208846 |
| chr9 | 110434987 | 110435770 |
| chr9 | 110450082 | 110450386 |
| chr9 | 111071324 | 111071425 |
| chr9 | 111073178 | 111073332 |
| chr9 | 113650642 | 113651027 |
| chr9 | 113651186 | 113651487 |
| chr9 | 113693724 | 113693930 |
| chr9 | 113747268 | 113747721 |

|      |           |           |
|------|-----------|-----------|
| chr9 | 113781046 | 113781242 |
| chr9 | 113806763 | 113806915 |
| chr9 | 113840111 | 113841036 |
| chr9 | 113994205 | 113994461 |
| chr9 | 114310418 | 114311326 |
| chr9 | 114598443 | 114598758 |
| chr9 | 114628403 | 114628519 |
| chr9 | 114656414 | 114657291 |
| chr9 | 114948621 | 114949016 |
| chr9 | 114994395 | 114994965 |
| chr9 | 115045701 | 115045813 |
| chr9 | 115083268 | 115083761 |
| chr9 | 115108826 | 115109071 |
| chr9 | 117959531 | 117959958 |
| chr9 | 118542832 | 118542942 |
| chr9 | 119255106 | 119255582 |
| chr9 | 119311180 | 119312859 |
| chr9 | 120037742 | 120038165 |
| chr9 | 120038465 | 120038724 |
| chr9 | 120039515 | 120039845 |
| chr9 | 120480611 | 120481113 |
| chr9 | 120483240 | 120483574 |
| chr9 | 120842605 | 120843746 |
| chr9 | 120849910 | 120850487 |
| chr9 | 120868388 | 120869115 |
| chr9 | 121206830 | 121207611 |
| chr9 | 121244472 | 121244607 |
| chr9 | 121281672 | 121281913 |
| chr9 | 121638522 | 121638823 |
| chr9 | 121665350 | 121665691 |
| chr9 | 122591368 | 122591828 |
| chr9 | 122887653 | 122887982 |
| chr9 | 122901332 | 122901524 |
| chrM | 0         | 2047      |
| chrM | 2177      | 4338      |
| chrM | 10911     | 15559     |
| chrX | 5684000   | 5684174   |
| chrX | 5977754   | 5978037   |
| chrX | 6062379   | 6062519   |
| chrX | 7352108   | 7352314   |
| chrX | 7418991   | 7419765   |
| chrX | 7462916   | 7463011   |
| chrX | 7470219   | 7470468   |

|      |          |          |
|------|----------|----------|
| chrX | 7497065  | 7497192  |
| chrX | 7500150  | 7500410  |
| chrX | 8439377  | 8440108  |
| chrX | 8440844  | 8441439  |
| chrX | 11427642 | 11427745 |
| chrX | 11842271 | 11842394 |
| chrX | 12187497 | 12187727 |
| chrX | 12642841 | 12643261 |
| chrX | 12648173 | 12650259 |
| chrX | 12663835 | 12663978 |
| chrX | 12694032 | 12694242 |
| chrX | 12719222 | 12719378 |
| chrX | 12780634 | 12780914 |
| chrX | 12858935 | 12859194 |
| chrX | 17740399 | 17740501 |
| chrX | 17836276 | 17836414 |
| chrX | 20015408 | 20015865 |
| chrX | 20021580 | 20021785 |
| chrX | 20058652 | 20058799 |
| chrX | 20059565 | 20059663 |
| chrX | 20275672 | 20276044 |
| chrX | 20276352 | 20276857 |
| chrX | 20293973 | 20294370 |
| chrX | 20444736 | 20444936 |
| chrX | 20573716 | 20573801 |
| chrX | 22439084 | 22439183 |
| chrX | 22607674 | 22607771 |
| chrX | 28892743 | 28892975 |
| chrX | 34295002 | 34295176 |
| chrX | 35534320 | 35534608 |
| chrX | 35557125 | 35557222 |
| chrX | 35653731 | 35653865 |
| chrX | 38579056 | 38579145 |
| chrX | 39421567 | 39422070 |
| chrX | 39432879 | 39433079 |
| chrX | 40607265 | 40607448 |
| chrX | 45265630 | 45265807 |
| chrX | 45274105 | 45274207 |
| chrX | 45611398 | 45611655 |
| chrX | 45622991 | 45623639 |
| chrX | 45695284 | 45695379 |
| chrX | 45721606 | 45722337 |
| chrX | 47758923 | 47759125 |

|      |          |          |
|------|----------|----------|
| chrX | 50341524 | 50341789 |
| chrX | 50367098 | 50367607 |
| chrX | 54719616 | 54719791 |
| chrX | 55284160 | 55285011 |
| chrX | 59192083 | 59192217 |
| chrX | 61749786 | 61749994 |
| chrX | 65932082 | 65932271 |
| chrX | 68520815 | 68521279 |
| chrX | 68564376 | 68564544 |
| chrX | 68809191 | 68809735 |
| chrX | 68809928 | 68810347 |
| chrX | 70364849 | 70365096 |
| chrX | 70728971 | 70729134 |
| chrX | 70740130 | 70741282 |
| chrX | 70887855 | 70888517 |
| chrX | 70918585 | 70919451 |
| chrX | 71035470 | 71036075 |
| chrX | 71516287 | 71516840 |
| chrX | 71517403 | 71518063 |
| chrX | 71553052 | 71553598 |
| chrX | 74756196 | 74757580 |
| chrX | 78316009 | 78316256 |
| chrX | 80781369 | 80781509 |
| chrX | 82405881 | 82405969 |
| chrX | 84067379 | 84067475 |
| chrX | 84483689 | 84483816 |
| chrX | 91614633 | 91614733 |
| chrX | 91970303 | 91970404 |
| chrX | 93363032 | 93363281 |
| chrX | 96247454 | 96247753 |
| chrX | 97638696 | 97638787 |
| chrX | 97821491 | 97821777 |
| chrX | 97875181 | 97875371 |
| chrX | 98438134 | 98438242 |
| chrX | 98665398 | 98665916 |
| chrX | 98743659 | 98743895 |
| chrX | 98753461 | 98753669 |
| chrX | 98778909 | 98779139 |
| chrX | 98835600 | 98835940 |
| chrX | 98836018 | 98836223 |
| chrX | 98847582 | 98848321 |
| chrX | 98863318 | 98863680 |
| chrX | 98878290 | 98878425 |



|      |           |           |
|------|-----------|-----------|
| chrX | 98892221  | 98893381  |
| chrX | 98904331  | 98905004  |
| chrX | 98923737  | 98923887  |
| chrX | 99320652  | 99320810  |
| chrX | 100643145 | 100643589 |
| chrX | 100643845 | 100644582 |
| chrX | 100652376 | 100653701 |
| chrX | 100661521 | 100662241 |
| chrX | 100677189 | 100677815 |
| chrX | 102308037 | 102308328 |
| chrX | 103384484 | 103384855 |
| chrX | 108490843 | 108490951 |
| chrX | 109480179 | 109480365 |
| chrX | 113772680 | 113772865 |
| chrX | 113862476 | 113862612 |
| chrX | 120516942 | 120517107 |
| chrX | 125235106 | 125235236 |
| chrX | 126317664 | 126317817 |
| chrX | 126445619 | 126445737 |
| chrX | 126509053 | 126509251 |
| chrX | 126514352 | 126514731 |
| chrX | 130880285 | 130880504 |
| chrX | 130960994 | 130961254 |
| chrX | 132335802 | 132336338 |
| chrX | 132373960 | 132374294 |
| chrX | 133124922 | 133125022 |
| chrX | 136982204 | 136982320 |
| chrX | 138414695 | 138414920 |
| chrX | 139116154 | 139116767 |
| chrX | 139117083 | 139117592 |
| chrX | 139139065 | 139139462 |
| chrX | 140752544 | 140753638 |
| chrX | 140759789 | 140760389 |
| chrX | 140765490 | 140766142 |
| chrX | 140768086 | 140768411 |
| chrX | 140770393 | 140770989 |
| chrX | 141949569 | 141949655 |
| chrX | 147481470 | 147482158 |
| chrX | 147482205 | 147482804 |
| chrX | 147489134 | 147489521 |
| chrX | 147749378 | 147749573 |
| chrX | 147778770 | 147779097 |
| chrX | 147779167 | 147779515 |

|      |           |           |
|------|-----------|-----------|
| chrX | 147779546 | 147779818 |
| chrX | 148237673 | 148238261 |
| chrX | 148238311 | 148238598 |
| chrX | 148272447 | 148272655 |
| chrX | 148278113 | 148278446 |
| chrX | 148293911 | 148294260 |
| chrX | 148331728 | 148331830 |
| chrX | 148341122 | 148341718 |
| chrX | 148362722 | 148362960 |
| chrX | 148368852 | 148369182 |
| chrX | 148615181 | 148615561 |
| chrX | 148707982 | 148708307 |
| chrX | 151413901 | 151414021 |
| chrX | 155693702 | 155694404 |
| chrX | 155695209 | 155695446 |
| chrX | 155852638 | 155852834 |
| chrX | 155887207 | 155887341 |
| chrX | 155912505 | 155912605 |
| chrX | 155970431 | 155971420 |
| chrX | 156016247 | 156016733 |
| chrX | 156016803 | 156017258 |
| chrX | 156022963 | 156023496 |
| chrX | 156967124 | 156967364 |
| chrX | 157204037 | 157204163 |
| chrX | 157553674 | 157554205 |
| chrX | 157584935 | 157585203 |
| chrX | 157600665 | 157601401 |
| chrX | 157640351 | 157640601 |
| chrX | 157642244 | 157642853 |
| chrX | 157669395 | 157670306 |
| chrX | 157671546 | 157671842 |
| chrX | 157683570 | 157683730 |
| chrX | 158507389 | 158507520 |
| chrX | 159198505 | 159198981 |
| chrX | 159377996 | 159378313 |
| chrX | 159378932 | 159379269 |
| chrX | 164068170 | 164068298 |
| chrX | 166415711 | 166417301 |
| chrX | 166421002 | 166422229 |
| chrX | 166426730 | 166428764 |
| chrX | 166437189 | 166437507 |
| chrX | 166649960 | 166650129 |
| chrY | 352612    | 352926    |
